# Supplementary material for: High-Throughput, Kingdom-Wide Prediction and Annotation of Bacterial Non-Coding RNAs
Source: PLoS One. 2008 Sep 12;3(9):e3197. doi: 10.1371/journal.pone.0003197 (PMC2527527; doi:10.1371/journal.pone.0003197)
Supplement: Table S1 — A summary of the numbers and types of loci identified in each of the 932 replicons included in the SIPHT search (0.29 MB XLS) [file pone.0003197.s001.xls]

## Sheet: Sheet1
species	replicon	family	access_# ber	Total loci predicted	Total loci minus HR loci	# Known	# Known-HR loci	# Known QZ loci	# Known HR loci	# Known loci w/ homology to known regRNAs	# Known loci w/ conserved synteny	# Known UTR loci	# Known loci w/ TFBSs	# Known RS loci	Total length known loci sequence	# Candidate	# Candidate-HR loci	# Candidate QZ loci	# Candidate HR loci	# Candidate loci w/ homology to known regRNAs	# Candidate loci w/ conserved synteny	# Candidate UTR loci	# Candidate RS loci	# Candidate loci w/ TFBSs	Total length candidate loci sequence	Total length all loci sequence	replicon size	Total IGR	Total conserved IGR	total IGR terms
Acidiphilium_cryptum_JF-5	plasmid_pACRY01	Alphaproteobacteria	NC_009467	1	1	0	0	0	0	0	0	0	0	0	0	1	1	0	0	0	0	0	0	0	94	94	203589	28038	5844	13
Acidiphilium_cryptum_JF-5	plasmid_pACRY02	Alphaproteobacteria	NC_009468	0	0	0	0	0	0	0	0	0	0	0	0	0	0	0	0	0	0	0	0	0	0	0	187422	32592	4541	10
Acidiphilium_cryptum_JF-5	plasmid_pACRY03	Alphaproteobacteria	NC_009469	0	0	0	0	0	0	0	0	0	0	0	0	0	0	0	0	0	0	0	0	0	0	0	88953	12157	0	8
Acidiphilium_cryptum_JF-5	plasmid_pACRY04	Alphaproteobacteria	NC_009470	0	0	0	0	0	0	0	0	0	0	0	0	0	0	0	0	0	0	0	0	0	0	0	37415	6141	408	4
Acidiphilium_cryptum_JF-5	plasmid_pACRY05	Alphaproteobacteria	NC_009471	0	0	0	0	0	0	0	0	0	0	0	0	0	0	0	0	0	0	0	0	0	0	0	37155	6150	1542	7
Acidiphilium_cryptum_JF-5	plasmid_pACRY06	Alphaproteobacteria	NC_009472	0	0	0	0	0	0	0	0	0	0	0	0	0	0	0	0	0	0	0	0	0	0	0	8781	1582	0	3
Acidiphilium_cryptum_JF-5	plasmid_pACRY07	Alphaproteobacteria	NC_009473	0	0	0	0	0	0	0	0	0	0	0	0	0	0	0	0	0	0	0	0	0	0	0	5629	1193	0	0
Acidiphilium_cryptum_JF-5	plasmid_pACRY08	Alphaproteobacteria	NC_009474	0	0	0	0	0	0	0	0	0	0	0	0	0	0	0	0	0	0	0	0	0	0	0	4909	272	0	0
Acidiphilium_cryptum_JF-5	chromosome	Alphaproteobacteria	NC_009484	2	2	0	0	0	0	0	0	0	0	0	0	2	2	0	0	2	0	0	0	0	125	125	3389227	251138	15672	192
Acidobacteria_bacterium_Ellin345	chromosome	Acidobacteria	NC_008009	1	1	0	0	0	0	0	0	0	0	0	0	1	1	0	0	0	0	0	0	0	496	496	5650368	557522	8484	441
Acidothermus_cellulolyticus_11B	chromosome	Actinobacteria	NC_008578	2	2	0	0	0	0	0	0	0	0	0	0	2	2	0	0	2	0	1	0	0	347	347	2443540	237127	4472	70
Acidovorax_avenae_citrulli_AAC00-1	chromosome	Betaproteobacteria	NC_008752	31	28	0	0	0	0	0	0	0	0	0	0	31	28	3	3	1	7	7	2	1	5274	5274	5352772	494600	65667	578
Acidovorax_JS42	plasmid_pAOVO01	Betaproteobacteria	NC_008765	0	0	0	0	0	0	0	0	0	0	0	0	0	0	0	0	0	0	0	0	0	0	0	72689	6984	170	8
Acidovorax_JS42	plasmid_pAOVO02	Betaproteobacteria	NC_008766	7	7	0	0	0	0	0	0	0	0	0	0	7	7	0	0	0	2	0	0	0	1340	1340	63609	7387	5466	12
Acidovorax_JS42	chromosome	Betaproteobacteria	NC_008782	54	37	0	0	0	0	0	0	0	0	0	0	54	37	3	17	2	4	11	4	2	10912	10912	4448856	405088	129306	547
Acinetobacter_baumannii_ATCC_17978	plasmid_pAB1	Gammaproteobacteria	NC_009083	0	0	0	0	0	0	0	0	0	0	0	0	0	0	0	0	0	0	0	0	0	0	0	13408	3439	353	4
Acinetobacter_baumannii_ATCC_17978	plasmid_pAB2	Gammaproteobacteria	NC_009084	0	0	0	0	0	0	0	0	0	0	0	0	0	0	0	0	0	0	0	0	0	0	0	11302	188	0	0
Acinetobacter_baumannii_ATCC_17978	chromosome	Gammaproteobacteria	NC_009085	26	26	0	0	0	0	0	0	0	0	0	0	26	26	4	0	1	2	0	0	11	5536	5536	3976747	768971	87057	436
Acinetobacter_sp_ADP1	chromosome	Gammaproteobacteria	NC_005966	33	27	1	1	0	0	1	0	0	0	0	402	32	26	3	6	2	3	3	0	14	7234	7636	3598621	389738	46788	356
Actinobacillus_pleuropneumoniae_L20	chromosome	Gammaproteobacteria	NC_009053	19	19	0	0	0	0	0	0	0	0	0	0	19	19	2	0	2	3	6	1	10	3591	3591	2274482	242576	34935	345
Actinobacillus_succinogenes_130Z	chromosome	Gammaproteobacteria	NC_009655	18	18	0	0	0	0	0	0	0	0	0	0	18	18	1	0	3	1	1	3	10	2566	2566	2319663	229280	25162	307
Aeromonas_hydrophila_ATCC_7966	chromosome	Gammaproteobacteria	NC_008570	236	236	0	0	0	0	0	0	0	0	0	0	236	236	39	0	18	22	41	1	18	41698	41698	4744448	506034	202409	881
Aeromonas_salmonicida_A449	chromosome	Gammaproteobacteria	NC_009348	230	230	0	0	0	0	0	0	0	0	0	0	230	230	35	0	9	21	32	1	13	40184	40184	4702402	545081	286001	928
Aeromonas_salmonicida_A449	plasmid_4	Gammaproteobacteria	NC_009349	0	0	0	0	0	0	0	0	0	0	0	0	0	0	0	0	0	0	0	0	0	0	0	166749	20588	3550	29
Aeromonas_salmonicida_A449	plasmid_5	Gammaproteobacteria	NC_009350	1	1	0	0	0	0	0	0	0	0	0	0	1	1	0	0	0	0	0	0	0	80	80	155098	24983	7039	24
Agrobacterium_tumefaciens_C58_Cereon	chromosome_1_circular	Alphaproteobacteria	NC_003062	18	18	2	2	0	0	1	0	1	0	0	221	16	16	1	0	2	0	3	1	1	2485	2706	2841581	295035	21154	420
Agrobacterium_tumefaciens_C58_Cereon	chromosome_linear	Alphaproteobacteria	NC_003063	4	4	2	2	0	0	2	0	0	0	0	466	2	2	0	0	1	0	0	0	0	533	999	2074782	174086	7957	169
Agrobacterium_tumefaciens_C58_Cereon	plasmid_AT	Alphaproteobacteria	NC_003064	1	1	0	0	0	0	0	0	0	0	0	0	1	1	0	0	0	0	1	0	0	140	140	542869	72004	1721	32
Agrobacterium_tumefaciens_C58_Cereon	plasmid_Ti	Alphaproteobacteria	NC_003065	1	1	0	0	0	0	0	0	0	0	0	0	1	1	0	0	0	0	0	0	0	57	57	214233	28587	4491	13
Alcanivorax_borkumensis_SK2	chromosome	Gammaproteobacteria	NC_008260	2	2	0	0	0	0	0	0	0	0	0	0	2	2	0	0	0	0	1	0	0	194	194	3120143	358563	6400	443
Alkalilimnicola_ehrlichei_MLHE-1	chromosome	Gammaproteobacteria	NC_008340	2	2	0	0	0	0	0	0	0	0	0	0	2	2	0	0	2	0	0	0	0	245	245	3275944	279122	12335	247
Alkaliphilus_metalliredigens_QYMF	chromosome	Firmicutes	NC_009633	16	16	0	0	0	0	0	0	0	0	0	0	16	16	1	0	11	4	2	1	8	4686	4686	4929566	660176	32655	794
Anabaena_variabilis_ATCC_29413	plasmid_A	Cyanobacteria	NC_007410	4	4	0	0	0	0	0	0	0	0	0	0	4	4	0	0	0	0	0	0	2	880	880	366354	50810	13689	23
Anabaena_variabilis_ATCC_29413	plasmid_B	Cyanobacteria	NC_007411	0	0	0	0	0	0	0	0	0	0	0	0	0	0	0	0	0	0	0	0	0	0	0	35762	4881	197	1
Anabaena_variabilis_ATCC_29413	plasmid_C	Cyanobacteria	NC_007412	2	2	0	0	0	0	0	0	0	0	0	0	2	2	0	0	0	0	0	0	0	209	209	300758	39142	8009	9
Anabaena_variabilis_ATCC_29413	chromosome	Cyanobacteria	NC_007413	317	200	0	0	0	0	0	0	0	0	0	0	317	200	17	117	3	4	27	10	70	54482	54482	6365727	1031630	655964	668
Anaeromyxobacter_dehalogenans_2CP-C	chromosome	Deltaproteobacteria	NC_007760	11	11	0	0	0	0	0	0	0	0	0	0	11	11	2	0	1	7	4	1	1	2988	2988	5013479	414504	23687	148
Anaeromyxobacter_Fw109-5	chromosome	Deltaproteobacteria	NC_009675	6	6	0	0	0	0	0	0	0	0	0	0	6	6	1	0	0	2	3	0	1	1833	1833	5277990	489031	40430	197
Anaplasma_marginale_St_Maries	chromosome	Alphaproteobacteria	NC_004842	1	1	0	0	0	0	0	0	0	0	0	0	1	1	0	0	0	0	1	0	0	161	161	1197687	143879	3358	46
Anaplasma_phagocytophilum_HZ	chromosome	Alphaproteobacteria	NC_007797	0	0	0	0	0	0	0	0	0	0	0	0	0	0	0	0	0	0	0	0	0	0	0	1471282	266806	13662	32
Aquifex_aeolicus	chromosome	Aquificae	NC_000918	0	0	0	0	0	0	0	0	0	0	0	0	0	0	0	0	0	0	0	0	0	0	0	1551335	91261	0	21
Aquifex_aeolicus	plasmid_ece1	Aquificae	NC_001880	0	0	0	0	0	0	0	0	0	0	0	0	0	0	0	0	0	0	0	0	0	0	0	39456	7847	0	4
Arthrobacter_aurescens_TC1	chromosome	Actinobacteria	NC_008711	25	17	0	0	0	0	0	0	0	0	0	0	25	17	1	8	2	2	2	0	0	4053	4053	4597686	384365	62015	360
Arthrobacter_aurescens_TC1	plasmid_TC1	Actinobacteria	NC_008712	1	1	0	0	0	0	0	0	0	0	0	0	1	1	0	0	0	0	0	0	0	137	137	328237	37799	6289	25
Arthrobacter_aurescens_TC1	plasmid_TC2	Actinobacteria	NC_008713	0	0	0	0	0	0	0	0	0	0	0	0	0	0	0	0	0	0	0	0	0	0	0	300725	45384	3988	23
Arthrobacter_FB24	plasmid_1	Actinobacteria	NC_008537	2	2	0	0	0	0	0	0	0	0	0	0	2	2	0	0	0	0	0	0	0	561	561	159538	23108	569	19
Arthrobacter_FB24	plasmid_2	Actinobacteria	NC_008538	1	1	0	0	0	0	0	0	0	0	0	0	1	1	0	0	0	0	0	0	0	213	213	115507	15856	1182	15
Arthrobacter_FB24	plasmid_3	Actinobacteria	NC_008539	1	1	0	0	0	0	0	0	0	0	0	0	1	1	0	0	0	0	0	0	0	318	318	96488	13717	1259	5
Arthrobacter_FB24	chromosome_1	Actinobacteria	NC_008541	24	24	0	0	0	0	0	0	0	0	0	0	24	24	1	0	4	1	3	0	0	4872	4872	4698945	432701	36483	463
Aster_yellows_witches-broom_phytoplasma_AYWB	chromosome	Firmicutes	NC_007716	7	4	0	0	0	0	0	0	0	0	0	0	7	4	0	3	3	0	6	3	3	1153	1153	706569	127236	11971	84
Aster_yellows_witches-broom_phytoplasma_AYWB	plasmid_pAYWB-I	Firmicutes	NC_007717	1	1	0	0	0	0	0	0	0	0	0	0	1	1	0	0	0	0	0	0	0	202	202	3972	982	317	5
Aster_yellows_witches-broom_phytoplasma_AYWB	plasmid_pAYWB-II	Firmicutes	NC_007718	0	0	0	0	0	0	0	0	0	0	0	0	0	0	0	0	0	0	0	0	0	0	0	4009	1587	0	2
Aster_yellows_witches-broom_phytoplasma_AYWB	plasmid_pAYWB-III	Firmicutes	NC_007719	0	0	0	0	0	0	0	0	0	0	0	0	0	0	0	0	0	0	0	0	0	0	0	5104	340	0	1
Aster_yellows_witches-broom_phytoplasma_AYWB	plasmid_pAYWB-IV	Firmicutes	NC_007720	0	0	0	0	0	0	0	0	0	0	0	0	0	0	0	0	0	0	0	0	0	0	0	4316	1025	571	3
Azoarcus_BH72	chromosome	Betaproteobacteria	NC_008702	8	8	0	0	0	0	0	0	0	0	0	0	8	8	1	0	2	0	2	0	3	1601	1601	4376040	346910	5243	384
Azoarcus_sp_EbN1	chromosome	Betaproteobacteria	NC_006513	2	2	1	1	0	0	0	0	1	0	1	132	1	1	1	0	0	0	0	0	1	270	402	4296230	368810	8236	342
Azoarcus_sp_EbN1	plasmid_1	Betaproteobacteria	NC_006823	0	0	0	0	0	0	0	0	0	0	0	0	0	0	0	0	0	0	0	0	0	0	0	207355	22543	638	17
Azoarcus_sp_EbN1	plasmid_2	Betaproteobacteria	NC_006824	1	1	0	0	0	0	0	0	0	0	0	0	1	1	0	0	0	0	0	0	0	74	74	223670	33225	3603	18
Bacillus_amyloliquefaciens_FZB42	chromosome	Firmicutes	NC_009725	128	123	0	0	0	0	0	0	0	0	0	0	128	123	24	5	48	43	34	19	54	26843	26843	3918589	407471	112657	598
Bacillus_anthracis_Ames	chromosome	Firmicutes	NC_003997	744	656	59	35	11	24	55	52	27	36	32	15165	685	621	53	64	46	18	86	21	241	109088	124253	5227293	721584	621656	1064
Bacillus_anthracis_Ames_0581	plasmid_pXO1	Firmicutes	NC_007322	15	15	0	0	0	0	0	0	0	0	0	0	15	15	2	0	1	0	6	0	7	2636	2636	181677	36745	15962	50
Bacillus_anthracis_Ames_0581	plasmid_pXO2	Firmicutes	NC_007323	4	4	0	0	0	0	0	0	0	0	0	0	4	4	1	0	1	0	0	0	3	666	666	94830	16181	11931	16
Bacillus_anthracis_Ames_0581	chromosome	Firmicutes	NC_007530	746	657	60	36	12	24	56	53	28	37	32	15226	686	621	53	65	45	17	85	21	241	109470	124696	5227419	721356	621190	1066
Bacillus_anthracis_str_Sterne	chromosome	Firmicutes	NC_005945	829	735	65	38	13	27	61	59	31	41	34	16324	764	697	64	67	54	23	89	28	266	131842	148166	5228663	752847	581810	1170
Bacillus_cereus_ATCC_10987	chromosome	Firmicutes	NC_003909	502	418	48	26	11	22	44	43	19	29	22	11439	454	392	33	62	28	17	69	22	158	77630	89069	5224283	680093	408230	988
Bacillus_cereus_ATCC_10987	plasmid_pBc10987	Firmicutes	NC_005707	13	13	0	0	0	0	0	0	0	0	0	0	13	13	2	0	1	0	5	3	9	2821	2821	208369	38084	9338	56
Bacillus_cereus_ATCC14579	plasmid_pBClin15	Firmicutes	NC_004721	0	0	0	0	0	0	0	0	0	0	0	0	0	0	0	0	0	0	0	0	0	0	0	15274	1848	0	1
Bacillus_cereus_ATCC14579	chromosome	Firmicutes	NC_004722	515	443	53	29	14	24	50	47	20	30	30	13755	462	414	42	48	49	19	54	19	158	85341	99096	5411809	773711	495192	1108
Bacillus_cereus_cytotoxis_NVH_391-98	plasmid_pBC9801	Firmicutes	NC_009673	0	0	0	0	0	0	0	0	0	0	0	0	0	0	0	0	0	0	0	0	0	0	0	7135	1842	0	0
Bacillus_cereus_cytotoxis_NVH_391-98	chromosome	Firmicutes	NC_009674	239	206	0	0	0	0	0	0	0	0	0	0	239	206	25	33	60	36	41	32	104	47858	47858	4087024	636459	229076	870
Bacillus_cereus_ZK	chromosome	Firmicutes	NC_006274	785	697	60	36	13	24	55	53	27	36	31	15305	725	661	59	64	52	27	85	24	254	131816	147121	5300915	754776	560792	1161
Bacillus_cereus_ZK	plasmid_pE33L466	Firmicutes	NC_007103	30	30	0	0	0	0	0	0	0	0	0	0	30	30	1	0	4	0	7	2	12	5210	5210	466370	109228	42398	147
Bacillus_cereus_ZK	plasmid_pE33L5	Firmicutes	NC_007104	1	1	0	0	0	0	0	0	0	0	0	0	1	1	0	0	0	0	0	0	1	431	431	5108	2121	394	4
Bacillus_cereus_ZK	plasmid_pE33L54	Firmicutes	NC_007105	6	6	0	0	0	0	0	0	0	0	0	0	6	6	0	0	0	0	2	0	3	1395	1395	53501	12393	4392	22
Bacillus_cereus_ZK	plasmid_pE33L8	Firmicutes	NC_007106	0	0	0	0	0	0	0	0	0	0	0	0	0	0	0	0	0	0	0	0	0	0	0	8191	3338	255	8
Bacillus_cereus_ZK	plasmid_pE33L9	Firmicutes	NC_007107	0	0	0	0	0	0	0	0	0	0	0	0	0	0	0	0	0	0	0	0	0	0	0	9150	3575	0	7
Bacillus_clausii_KSM-K16	chromosome	Firmicutes	NC_006582	17	17	9	9	0	0	9	6	3	0	4	2272	8	8	0	0	6	2	2	0	3	2401	4673	4303871	526891	23220	749
Bacillus_halodurans	chromosome	Firmicutes	NC_002570	34	19	13	13	5	0	13	10	1	1	8	3234	21	6	8	15	2	1	3	2	1	2978	6212	4202352	555446	33433	585
Bacillus_licheniformis_ATCC_14580	chromosome	Firmicutes	NC_006270	104	75	28	27	7	1	26	24	16	14	15	6230	76	48	13	28	12	9	10	3	21	15339	21569	4222334	502042	59812	770
Bacillus_licheniformis_DSM_13	chromosome	Firmicutes	NC_006322	93	68	30	29	9	1	28	28	16	14	17	6555	63	39	11	24	12	11	10	3	18	12635	19190	4222645	486459	51952	733
Bacillus_subtilis	chromosome	Firmicutes	NC_000964	156	137	40	34	13	6	35	31	20	22	23	9481	116	103	14	13	7	8	15	3	44	24932	34413	4214630	471636	120627	647
Bacillus_thuringiensis_Al_Hakam	plasmid_pALH1	Firmicutes	NC_008598	6	6	0	0	0	0	0	0	0	0	0	0	6	6	0	0	2	0	1	0	3	1331	1331	55939	10913	6416	16
Bacillus_thuringiensis_Al_Hakam	chromosome	Firmicutes	NC_008600	749	657	0	0	0	0	0	0	0	0	0	0	749	657	72	92	100	43	101	50	282	140694	140694	5257091	769198	547341	1197
Bacillus_thuringiensis_konkukian	chromosome	Firmicutes	NC_005957	806	705	66	36	13	30	62	60	30	40	36	16016	740	669	65	71	53	22	91	43	254	123833	139849	5237682	746385	570955	1196
Bacillus_thuringiensis_konkukian	plasmid_pBT9727	Firmicutes	NC_006578	4	4	0	0	0	0	0	0	0	0	0	0	4	4	0	0	0	0	1	0	2	959	959	77112	13902	4300	26
Bacteroides_fragilis_NCTC_9434	chromosome	Bacteroidetes/Chlorobi	NC_003228	46	38	0	0	0	0	0	0	0	0	0	0	46	38	7	8	3	1	7	1	21	8778	8778	5205140	492930	39776	489
Bacteroides_fragilis_NCTC_9434	plasmid_pBF9343	Bacteroidetes/Chlorobi	NC_006873	0	0	0	0	0	0	0	0	0	0	0	0	0	0	0	0	0	0	0	0	0	0	0	36560	2183	0	3
Bacteroides_fragilis_YCH46	plasmid_pBFY46	Bacteroidetes/Chlorobi	NC_006297	2	2	0	0	0	0	0	0	0	0	0	0	2	2	0	0	0	0	1	0	0	144	144	33716	3048	135	8
Bacteroides_fragilis_YCH46	chromosome	Bacteroidetes/Chlorobi	NC_006347	47	40	0	0	0	0	0	0	0	0	0	0	47	40	6	7	2	1	6	2	19	9040	9040	5277274	475018	36919	470
Bacteroides_thetaiotaomicron_VPI-5482	chromosome	Bacteroidetes/Chlorobi	NC_004663	55	43	0	0	0	0	0	0	0	0	0	0	55	43	8	12	2	1	10	4	17	9949	9949	6260361	600895	52163	730
Bacteroides_thetaiotaomicron_VPI-5482	plasmid_p5482	Bacteroidetes/Chlorobi	NC_004703	2	2	0	0	0	0	0	0	0	0	0	0	2	2	0	0	0	0	1	0	1	662	662	33038	5597	1721	5
Bacteroides_vulgatus_ATCC_8482	chromosome	Bacteroidetes/Chlorobi	NC_009614	73	37	0	0	0	0	0	0	0	0	0	0	73	37	1	36	6	1	11	14	13	12852	12852	5163189	524111	42036	563
Bartonella_bacilliformis_KC583	chromosome	Alphaproteobacteria	NC_008783	5	5	0	0	0	0	0	0	0	0	0	0	5	5	0	0	1	0	2	0	2	1166	1166	1445021	217431	38420	58
Bartonella_henselae_Houston-1	chromosome	Alphaproteobacteria	NC_005956	21	21	0	0	0	0	0	0	0	0	0	0	21	21	2	0	2	0	4	0	12	4260	4260	1931047	236156	261043	72
Bartonella_quintana_Toulouse	chromosome	Alphaproteobacteria	NC_005955	19	19	0	0	0	0	0	0	0	0	0	0	19	19	1	0	1	1	3	0	9	3781	3781	1581384	195134	236814	57
Baumannia_cicadellinicola_Homalodisca_coagulata	chromosome_1_linear	Gammaproteobacteria	NC_007984	0	0	0	0	0	0	0	0	0	0	0	0	0	0	0	0	0	0	0	0	0	0	0	686194	74881	10026	22
Bdellovibrio_bacteriovorus	chromosome	Deltaproteobacteria	NC_005363	0	0	0	0	0	0	0	0	0	0	0	0	0	0	0	0	0	0	0	0	0	0	0	3782950	257150	0	413
Bifidobacterium_adolescentis_ATCC_15703	chromosome	Actinobacteria	NC_008618	4	4	0	0	0	0	0	0	0	0	0	0	4	4	0	0	0	0	1	0	0	948	948	2089645	235666	17751	352
Bifidobacterium_longum	chromosome	Actinobacteria	NC_004307	6	6	0	0	0	0	0	0	0	0	0	0	6	6	0	0	0	0	3	0	0	1429	1429	2256640	253322	43405	300
Bifidobacterium_longum	plasmid_pBLO1	Actinobacteria	NC_004943	0	0	0	0	0	0	0	0	0	0	0	0	0	0	0	0	0	0	0	0	0	0	0	3626	1037	0	0
Bordetella_bronchiseptica	chromosome	Betaproteobacteria	NC_002927	330	255	4	3	1	1	2	3	2	0	0	914	326	252	57	74	4	70	85	11	16	46375	47289	5339179	393621	282535	545
Bordetella_parapertussis	chromosome	Betaproteobacteria	NC_002928	270	227	3	2	1	1	2	2	1	0	0	792	267	225	38	42	6	53	67	8	13	38629	39421	4773551	353890	470959	433
Bordetella_pertussis	chromosome	Betaproteobacteria	NC_002929	215	178	2	1	0	1	1	1	0	0	0	707	213	177	36	36	1	40	52	5	10	29732	30439	4086189	361435	513264	371
Borrelia_afzelii_PKo	plasmid_cp30	Spirochaetes	NC_008273	0	0	0	0	0	0	0	0	0	0	0	0	0	0	0	0	0	0	0	0	0	0	0	30017	2806	1856	3
Borrelia_afzelii_PKo	plasmid_cp27	Spirochaetes	NC_008274	0	0	0	0	0	0	0	0	0	0	0	0	0	0	0	0	0	0	0	0	0	0	0	26533	3469	0	5
Borrelia_afzelii_PKo	chromosome_1_linear	Spirochaetes	NC_008277	0	0	0	0	0	0	0	0	0	0	0	0	0	0	0	0	0	0	0	0	0	0	0	905394	48311	1502	11
Borrelia_afzelii_PKo	plasmid_lp60	Spirochaetes	NC_008564	0	0	0	0	0	0	0	0	0	0	0	0	0	0	0	0	0	0	0	0	0	0	0	59958	11171	0	19
Borrelia_afzelii_PKo	plasmid_lp60-2	Spirochaetes	NC_008565	0	0	0	0	0	0	0	0	0	0	0	0	0	0	0	0	0	0	0	0	0	0	0	59804	16545	721	7
Borrelia_afzelii_PKo	plasmid_lp34	Spirochaetes	NC_008566	1	1	0	0	0	0	0	0	0	0	0	0	1	1	0	0	0	0	0	0	0	93	93	34273	9037	523	5
Borrelia_afzelii_PKo	plasmid_lp32	Spirochaetes	NC_008567	0	0	0	0	0	0	0	0	0	0	0	0	0	0	0	0	0	0	0	0	0	0	0	32368	10446	0	3
Borrelia_afzelii_PKo	plasmid_lp28	Spirochaetes	NC_008568	0	0	0	0	0	0	0	0	0	0	0	0	0	0	0	0	0	0	0	0	0	0	0	28533	7523	505	4
Borrelia_afzelii_PKo	plasmid_lp25	Spirochaetes	NC_008569	0	0	0	0	0	0	0	0	0	0	0	0	0	0	0	0	0	0	0	0	0	0	0	24794	2909	0	1
Borrelia_burgdorferi	plasmid_cp32-1	Spirochaetes	NC_000948	0	0	0	0	0	0	0	0	0	0	0	0	0	0	0	0	0	0	0	0	0	0	0	30750	2373	430	3
Borrelia_burgdorferi	plasmid_cp32-3	Spirochaetes	NC_000949	0	0	0	0	0	0	0	0	0	0	0	0	0	0	0	0	0	0	0	0	0	0	0	30223	2245	431	3
Borrelia_burgdorferi	plasmid_cp32-4	Spirochaetes	NC_000950	0	0	0	0	0	0	0	0	0	0	0	0	0	0	0	0	0	0	0	0	0	0	0	30299	2871	0	2
Borrelia_burgdorferi	plasmid_cp32-6	Spirochaetes	NC_000951	0	0	0	0	0	0	0	0	0	0	0	0	0	0	0	0	0	0	0	0	0	0	0	29838	2167	418	1
Borrelia_burgdorferi	plasmid_cp32-7	Spirochaetes	NC_000952	0	0	0	0	0	0	0	0	0	0	0	0	0	0	0	0	0	0	0	0	0	0	0	30800	1989	431	1
Borrelia_burgdorferi	plasmid_cp32-8	Spirochaetes	NC_000953	0	0	0	0	0	0	0	0	0	0	0	0	0	0	0	0	0	0	0	0	0	0	0	30885	2321	418	3
Borrelia_burgdorferi	plasmid_cp32-9	Spirochaetes	NC_000954	0	0	0	0	0	0	0	0	0	0	0	0	0	0	0	0	0	0	0	0	0	0	0	30651	4164	1849	3
Borrelia_burgdorferi	plasmid_lp21	Spirochaetes	NC_000955	0	0	0	0	0	0	0	0	0	0	0	0	0	0	0	0	0	0	0	0	0	0	0	18753	1612	0	1
Borrelia_burgdorferi	plasmid_lp56	Spirochaetes	NC_000956	0	0	0	0	0	0	0	0	0	0	0	0	0	0	0	0	0	0	0	0	0	0	0	52971	7659	276	10
Borrelia_burgdorferi	plasmid_lp5	Spirochaetes	NC_000957	0	0	0	0	0	0	0	0	0	0	0	0	0	0	0	0	0	0	0	0	0	0	0	5228	1523	0	2
Borrelia_burgdorferi	chromosome_1_linear	Spirochaetes	NC_001318	1	1	0	0	0	0	0	0	0	0	0	0	1	1	0	0	1	0	1	0	1	260	260	910724	49628	1824	13
Borrelia_burgdorferi	plasmid_lp17	Spirochaetes	NC_001849	0	0	0	0	0	0	0	0	0	0	0	0	0	0	0	0	0	0	0	0	0	0	0	16823	6797	155	2
Borrelia_burgdorferi	plasmid_lp25	Spirochaetes	NC_001850	0	0	0	0	0	0	0	0	0	0	0	0	0	0	0	0	0	0	0	0	0	0	0	24177	8268	0	5
Borrelia_burgdorferi	plasmid_lp28-1	Spirochaetes	NC_001851	0	0	0	0	0	0	0	0	0	0	0	0	0	0	0	0	0	0	0	0	0	0	0	26921	6258	8533	1
Borrelia_burgdorferi	plasmid_lp28-2	Spirochaetes	NC_001852	0	0	0	0	0	0	0	0	0	0	0	0	0	0	0	0	0	0	0	0	0	0	0	29766	2344	1229	4
Borrelia_burgdorferi	plasmid_lp28-3	Spirochaetes	NC_001853	0	0	0	0	0	0	0	0	0	0	0	0	0	0	0	0	0	0	0	0	0	0	0	28601	9644	0	5
Borrelia_burgdorferi	plasmid_lp28-4	Spirochaetes	NC_001854	0	0	0	0	0	0	0	0	0	0	0	0	0	0	0	0	0	0	0	0	0	0	0	27323	8926	0	9
Borrelia_burgdorferi	plasmid_lp36	Spirochaetes	NC_001855	0	0	0	0	0	0	0	0	0	0	0	0	0	0	0	0	0	0	0	0	0	0	0	36849	9891	0	3
Borrelia_burgdorferi	plasmid_lp38	Spirochaetes	NC_001856	0	0	0	0	0	0	0	0	0	0	0	0	0	0	0	0	0	0	0	0	0	0	0	38829	12723	1541	7
Borrelia_burgdorferi	plasmid_lp54	Spirochaetes	NC_001857	0	0	0	0	0	0	0	0	0	0	0	0	0	0	0	0	0	0	0	0	0	0	0	53561	8961	0	12
Borrelia_burgdorferi	plasmid_cp26	Spirochaetes	NC_001903	0	0	0	0	0	0	0	0	0	0	0	0	0	0	0	0	0	0	0	0	0	0	0	26498	3185	0	5
Borrelia_burgdorferi	plasmid_cp9	Spirochaetes	NC_001904	0	0	0	0	0	0	0	0	0	0	0	0	0	0	0	0	0	0	0	0	0	0	0	9386	2250	0	2
Borrelia_garinii_PBi	plasmid_cp26	Spirochaetes	NC_006128	0	0	0	0	0	0	0	0	0	0	0	0	0	0	0	0	0	0	0	0	0	0	0	27108	3147	0	7
Borrelia_garinii_PBi	plasmid_lp54	Spirochaetes	NC_006129	0	0	0	0	0	0	0	0	0	0	0	0	0	0	0	0	0	0	0	0	0	0	0	55560	14470	0	20
Borrelia_garinii_PBi	chromosome_1_linear	Spirochaetes	NC_006156	0	0	0	0	0	0	0	0	0	0	0	0	0	0	0	0	0	0	0	0	0	0	0	904246	54595	2954	14
Bradyrhizobium_BTAi1	plasmid_pBBta01	Alphaproteobacteria	NC_009475	3	3	0	0	0	0	0	0	0	0	0	0	3	3	0	0	0	0	0	0	0	405	405	228826	35423	9772	12
Bradyrhizobium_BTAi1	chromosome	Alphaproteobacteria	NC_009485	216	190	0	0	0	0	0	0	0	0	0	0	216	190	19	26	3	27	43	7	7	35892	35892	8264687	1062490	389466	724
Bradyrhizobium_japonicum	chromosome	Alphaproteobacteria	NC_004463	48	48	4	4	0	0	1	0	3	3	0	666	44	44	4	0	2	8	6	0	1	7674	8340	9105828	1093080	73400	803
Bradyrhizobium_ORS278	chromosome	Alphaproteobacteria	NC_009445	234	199	0	0	0	0	0	0	0	0	0	0	234	199	21	35	1	26	32	14	5	38554	38554	7456587	972394	409990	678
Brucella_abortus_9-941	chromosome_1	Alphaproteobacteria	NC_006932	258	215	2	2	0	0	1	0	1	0	0	433	256	213	63	43	2	12	49	12	25	39394	39827	2124241	257976	346312	325
Brucella_abortus_9-941	chromosome_2	Alphaproteobacteria	NC_006933	107	96	3	3	0	0	2	0	0	0	0	578	104	93	16	11	0	0	14	5	5	13716	14294	1162204	116100	184440	144
Brucella_melitensis	chromosome_1	Alphaproteobacteria	NC_003317	264	214	1	1	0	0	0	0	1	0	0	145	263	213	65	50	3	10	47	12	25	42316	42461	2117144	287587	226404	364
Brucella_melitensis	chromosome_2	Alphaproteobacteria	NC_003318	102	96	3	3	0	0	2	0	0	0	0	576	99	93	13	6	0	2	11	3	7	13776	14352	1177787	134795	102985	146
Brucella_melitensis_biovar_Abortus	chromosome_1	Alphaproteobacteria	NC_007618	243	206	0	0	0	0	0	0	0	0	0	0	243	206	63	37	5	14	46	9	21	37210	37210	2121359	258060	347582	315
Brucella_melitensis_biovar_Abortus	chromosome_2	Alphaproteobacteria	NC_007624	87	83	0	0	0	0	0	0	0	0	0	0	87	83	13	4	1	1	15	3	4	11780	11780	1156948	113762	193638	124
Brucella_ovis	chromosome_2	Alphaproteobacteria	NC_009504	97	91	0	0	0	0	0	0	0	0	0	0	97	91	14	6	0	3	16	4	5	13988	13988	1164220	125341	173883	139
Brucella_ovis	chromosome_1	Alphaproteobacteria	NC_009505	257	216	0	0	0	0	0	0	0	0	0	0	257	216	63	41	6	15	51	8	27	39085	39085	2111370	257023	301443	329
Brucella_suis_1330	chromosome_1	Alphaproteobacteria	NC_004310	245	196	2	2	0	0	1	0	1	0	0	433	243	194	57	49	3	11	47	9	24	36866	37299	2107794	246464	267690	320
Brucella_suis_1330	chromosome_2	Alphaproteobacteria	NC_004311	101	93	3	3	0	0	2	0	0	0	0	577	98	90	14	8	0	0	16	3	5	13185	13762	1207381	118246	141895	142
Buchnera_aphidicola	chromosome	Gammaproteobacteria	NC_004545	0	0	0	0	0	0	0	0	0	0	0	0	0	0	0	0	0	0	0	0	0	0	0	615980	88919	1016	23
Buchnera_aphidicola	plasmid_pBBp1	Gammaproteobacteria	NC_004555	0	0	0	0	0	0	0	0	0	0	0	0	0	0	0	0	0	0	0	0	0	0	0	2399	320	0	0
Buchnera_aphidicola_Cc_Cinara_cedri	chromosome	Gammaproteobacteria	NC_008513	0	0	0	0	0	0	0	0	0	0	0	0	0	0	0	0	0	0	0	0	0	0	0	416380	48501	0	38
Buchnera_aphidicola_Sg	chromosome	Gammaproteobacteria	NC_004061	1	1	0	0	0	0	0	0	0	0	0	0	1	1	0	0	0	0	1	0	1	50	50	641454	62167	7337	29
Buchnera_sp	plasmid_pTrp	Gammaproteobacteria	NC_002252	0	0	0	0	0	0	0	0	0	0	0	0	0	0	0	0	0	0	0	0	0	0	0	7258	1	0	0
Buchnera_sp	plasmid_pLeu	Gammaproteobacteria	NC_002253	0	0	0	0	0	0	0	0	0	0	0	0	0	0	0	0	0	0	0	0	0	0	0	7786	1195	0	0
Buchnera_sp	chromosome	Gammaproteobacteria	NC_002528	0	0	0	0	0	0	0	0	0	0	0	0	0	0	0	0	0	0	0	0	0	0	0	640681	67420	1012	29
Burkholderia_383	chromosome_3	Betaproteobacteria	NC_007509	11	11	0	0	0	0	0	0	0	0	0	0	11	11	0	0	0	0	1	0	0	1382	1382	1395069	182364	31878	114
Burkholderia_383	chromosome_1	Gammaproteobacteria	NC_007510	295	294	1	1	0	0	0	0	0	0	0	122	294	293	57	1	8	42	90	7	14	42407	42529	3694126	420089	227155	667
Burkholderia_383	chromosome_2	Betaproteobacteria	NC_007511	121	121	0	0	0	0	0	0	0	0	0	0	121	121	18	0	3	28	27	3	7	18727	18727	3587082	419836	162497	378
Burkholderia_cenocepacia_AU_1054	chromosome_1	Betaproteobacteria	NC_008060	283	281	0	0	0	0	0	0	0	0	0	0	283	281	54	2	6	63	68	10	12	40820	40820	3294563	359712	209583	616
Burkholderia_cenocepacia_AU_1054	chromosome_2	Betaproteobacteria	NC_008061	118	118	0	0	0	0	0	0	0	0	0	0	118	118	19	0	0	30	29	2	5	17689	17689	2788459	334263	178253	313
Burkholderia_cenocepacia_AU_1054	chromosome_3	Betaproteobacteria	NC_008062	55	55	0	0	0	0	0	0	0	0	0	0	55	55	13	0	0	8	12	1	2	7321	7321	1196094	131289	73819	161
Burkholderia_cenocepacia_HI2424	chromosome_1	Betaproteobacteria	NC_008542	334	329	0	0	0	0	0	0	0	0	0	0	334	329	65	5	5	69	91	14	17	47654	47654	3483902	394681	225867	716
Burkholderia_cenocepacia_HI2424	chromosome_2	Betaproteobacteria	NC_008543	120	120	0	0	0	0	0	0	0	0	0	0	120	120	18	0	0	34	35	2	6	17853	17853	2998664	358764	163201	323
Burkholderia_cenocepacia_HI2424	chromosome_3	Betaproteobacteria	NC_008544	13	13	0	0	0	0	0	0	0	0	0	0	13	13	2	0	1	4	2	0	0	2515	2515	1055417	113246	36853	85
Burkholderia_cenocepacia_HI2424	plasmid_1	Betaproteobacteria	NC_008545	2	2	0	0	0	0	0	0	0	0	0	0	2	2	0	0	0	0	1	0	0	629	629	164857	20926	3256	17
Burkholderia_cepacia_AMMD	plasmid_1	Betaproteobacteria	NC_008385	5	5	0	0	0	0	0	0	0	0	0	0	5	5	3	0	0	1	1	0	0	540	540	43581	3146	2894	8
Burkholderia_cepacia_AMMD	chromosome_1	Betaproteobacteria	NC_008390	278	278	0	0	0	0	0	0	0	0	0	0	278	278	54	0	8	44	68	12	16	38920	38920	3556545	403046	219272	659
Burkholderia_cepacia_AMMD	chromosome_2	Betaproteobacteria	NC_008391	112	112	0	0	0	0	0	0	0	0	0	0	112	112	14	0	0	32	29	2	9	18649	18649	2646969	326225	138264	309
Burkholderia_cepacia_AMMD	chromosome_3	Betaproteobacteria	NC_008392	25	25	0	0	0	0	0	0	0	0	0	0	25	25	0	0	0	3	5	0	1	3629	3629	1281472	138606	35706	104
Burkholderia_mallei_ATCC_23344	chromosome_1	Betaproteobacteria	NC_006348	478	320	9	8	2	1	3	5	1	1	1	1354	469	312	116	157	12	94	119	69	20	71432	72786	3510148	434737	534317	761
Burkholderia_mallei_ATCC_23344	chromosome_2	Betaproteobacteria	NC_006349	162	135	0	0	0	0	0	0	0	0	0	0	162	135	19	27	2	43	36	18	3	25352	25352	2325379	279335	326227	292
Burkholderia_mallei_NCTC_10229	chromosome_1	Betaproteobacteria	NC_008835	148	129	0	0	0	0	0	0	0	0	0	0	148	129	17	19	0	30	35	11	3	22534	22534	2284095	274555	250984	266
Burkholderia_mallei_NCTC_10229	chromosome_2	Betaproteobacteria	NC_008836	453	324	0	0	0	0	0	0	0	0	0	0	453	324	120	129	12	98	96	49	16	71788	71788	3458208	435057	332095	731
Burkholderia_mallei_NCTC_10247	chromosome_1	Betaproteobacteria	NC_009079	151	136	0	0	0	0	0	0	0	0	0	0	151	136	19	15	1	28	39	15	4	22741	22741	2352693	265353	210710	264
Burkholderia_mallei_NCTC_10247	chromosome_2	Betaproteobacteria	NC_009080	443	325	0	0	0	0	0	0	0	0	0	0	443	325	121	118	13	94	94	52	21	70790	70790	3495687	436922	322771	729
Burkholderia_mallei_SAVP1	chromosome_1	Betaproteobacteria	NC_008784	117	111	0	0	0	0	0	0	0	0	0	0	117	111	17	6	1	27	27	8	3	18011	18011	1734922	195755	160255	214
Burkholderia_mallei_SAVP1	chromosome_2	Betaproteobacteria	NC_008785	18	18	0	0	0	0	0	0	0	0	0	0	18	18	0	0	1	3	2	0	2	2983	2983	3497479	423985	322047	714
Burkholderia_pseudomallei_668	chromosome_1	Betaproteobacteria	NC_009074	405	336	0	0	0	0	0	0	0	0	0	0	405	336	111	69	13	87	81	33	19	62731	62731	3912947	448311	285846	696
Burkholderia_pseudomallei_668	chromosome_2	Betaproteobacteria	NC_009075	130	125	0	0	0	0	0	0	0	0	0	0	130	125	20	5	2	23	36	11	2	19562	19562	3127456	305015	171054	302
Burkholderia_pseudomallei_1106a	chromosome_1	Betaproteobacteria	NC_009076	408	336	0	0	0	0	0	0	0	0	0	0	408	336	113	72	13	88	90	30	24	61450	61450	3988455	459816	294860	685
Burkholderia_pseudomallei_1106a	chromosome_2	Betaproteobacteria	NC_009078	136	135	0	0	0	0	0	0	0	0	0	0	136	135	21	1	1	22	36	13	2	21099	21099	3100794	322059	189434	299
Burkholderia_pseudomallei_1710b	chromosome_1	Betaproteobacteria	NC_007434	455	332	0	0	0	0	0	0	0	0	0	0	455	332	116	123	9	132	94	51	23	75599	75599	4126292	463737	393097	767
Burkholderia_pseudomallei_1710b	chromosome_2	Betaproteobacteria	NC_007435	185	143	0	0	0	0	0	0	0	0	0	0	185	143	28	42	3	55	31	21	5	31191	31191	3181762	363147	306525	343
Burkholderia_pseudomallei_K96243	chromosome_1	Betaproteobacteria	NC_006350	550	362	7	6	2	1	4	4	2	2	2	1327	543	356	123	187	9	147	95	71	26	91596	92923	4074542	570404	454767	880
Burkholderia_pseudomallei_K96243	chromosome_2	Betaproteobacteria	NC_006351	212	126	0	0	0	0	0	0	0	0	0	0	212	126	32	86	4	52	40	27	4	34799	34799	3173005	450347	391814	375
Burkholderia_thailandensis_E264	chromosome_2	Betaproteobacteria	NC_007650	147	123	0	0	0	0	0	0	0	0	0	0	147	123	20	24	1	38	30	13	2	24337	24337	2914771	338809	194656	332
Burkholderia_thailandensis_E264	chromosome_1	Betaproteobacteria	NC_007651	349	336	1	1	0	0	0	0	0	0	0	96	348	335	72	13	2	88	88	23	25	54360	54456	3809201	434604	251905	759
Burkholderia_vietnamiensis_G4	plasmid_pBVIE05	Betaproteobacteria	NC_009226	0	0	0	0	0	0	0	0	0	0	0	0	0	0	0	0	0	0	0	0	0	0	0	88096	8261	0	11
Burkholderia_vietnamiensis_G4	plasmid_pBVIE02	Betaproteobacteria	NC_009227	3	3	0	0	0	0	0	0	0	0	0	0	3	3	1	0	0	0	2	0	1	700	700	265616	34807	5193	30
Burkholderia_vietnamiensis_G4	plasmid_pBVIE04	Betaproteobacteria	NC_009228	1	1	0	0	0	0	0	0	0	0	0	0	1	1	0	0	0	0	0	0	0	82	82	107231	13178	2423	9
Burkholderia_vietnamiensis_G4	plasmid_pBVIE03	Betaproteobacteria	NC_009229	0	0	0	0	0	0	0	0	0	0	0	0	0	0	0	0	0	0	0	0	0	0	0	226679	26297	143	20
Burkholderia_vietnamiensis_G4	plasmid_pBVIE01	Betaproteobacteria	NC_009230	1	1	0	0	0	0	0	0	0	0	0	0	1	1	0	0	0	0	0	0	0	53	53	397868	57794	926	75
Burkholderia_vietnamiensis_G4	chromosome_3	Betaproteobacteria	NC_009254	17	17	0	0	0	0	0	0	0	0	0	0	17	17	1	0	1	3	3	0	1	2803	2803	1241007	159708	36150	104
Burkholderia_vietnamiensis_G4	chromosome_2	Betaproteobacteria	NC_009255	103	103	0	0	0	0	0	0	0	0	0	0	103	103	13	0	0	25	26	8	4	16224	16224	2411759	319700	120659	297
Burkholderia_vietnamiensis_G4	chromosome_1	Betaproteobacteria	NC_009256	251	250	0	0	0	0	0	0	0	0	0	0	251	250	49	1	6	51	68	15	14	35339	35339	3652814	442528	216897	691
Burkholderia_xenovorans_LB400	chromosome_1	Betaproteobacteria	NC_007951	41	41	1	1	0	0	0	0	0	0	0	123	40	40	9	0	3	4	7	0	12	6687	6810	4895836	612044	59191	800
Burkholderia_xenovorans_LB400	chromosome_2	Betaproteobacteria	NC_007952	4	4	0	0	0	0	0	0	0	0	0	0	4	4	0	0	0	0	1	0	0	905	905	3363523	398505	25904	368
Burkholderia_xenovorans_LB400	chromosome_3	Betaproteobacteria	NC_007953	4	4	0	0	0	0	0	0	0	0	0	0	4	4	1	0	0	0	1	0	0	761	761	1471779	176751	26623	93
Caldicellulosiruptor_saccharolyticus_DSM_8903	chromosome	Firmicutes	NC_009437	7	7	0	0	0	0	0	0	0	0	0	0	7	7	0	0	1	0	1	0	2	794	794	2970275	275689	47156	224
Campylobacter_curvus_525_92	chromosome	Epsilonproteobacteria	NC_009715	1	1	0	0	0	0	0	0	0	0	0	0	1	1	0	0	0	0	0	0	0	166	166	1971264	142235	48111	66
Campylobacter_fetus_82-40	chromosome	Epsilonproteobacteria	NC_008599	2	2	0	0	0	0	0	0	0	0	0	0	2	2	1	0	1	0	0	0	1	597	597	1773615	118502	10552	51
Campylobacter_hominis_ATCC_BAA-381	plasmid_pCH4	Epsilonproteobacteria	NC_009713	0	0	0	0	0	0	0	0	0	0	0	0	0	0	0	0	0	0	0	0	0	0	0	3678	283	0	1
Campylobacter_hominis_ATCC_BAA-381	chromosome	Epsilonproteobacteria	NC_009714	0	0	0	0	0	0	0	0	0	0	0	0	0	0	0	0	0	0	0	0	0	0	0	1711273	180743	26765	85
Campylobacter_jejuni	chromosome	Epsilonproteobacteria	NC_002163	1	1	0	0	0	0	0	0	0	0	0	0	1	1	0	0	1	0	0	0	0	80	80	1641481	73963	6979	26
Campylobacter_jejuni_81-176	plasmid_pVir	Epsilonproteobacteria	NC_008770	0	0	0	0	0	0	0	0	0	0	0	0	0	0	0	0	0	0	0	0	0	0	0	37473	4429	0	4
Campylobacter_jejuni_81-176	chromosome	Epsilonproteobacteria	NC_008787	1	1	0	0	0	0	0	0	0	0	0	0	1	1	0	0	1	0	0	0	0	80	80	1616554	85467	3108	32
Campylobacter_jejuni_81-176	plasmid_pTet	Epsilonproteobacteria	NC_008790	2	2	0	0	0	0	0	0	0	0	0	0	2	2	0	0	0	0	1	0	1	359	359	45025	3480	702	3
Campylobacter_jejuni_doylei_269_97	chromosome	Epsilonproteobacteria	NC_009707	0	0	0	0	0	0	0	0	0	0	0	0	0	0	0	0	0	0	0	0	0	0	0	1845106	133560	46986	49
Campylobacter_jejuni_RM1221	chromosome	Epsilonproteobacteria	NC_003912	2	2	0	0	0	0	0	0	0	0	0	0	2	2	0	0	1	0	0	0	0	298	298	1777831	90745	16118	30
Candidatus_Blochmannia_floridanus	chromosome	Gammaproteobacteria	NC_005061	0	0	0	0	0	0	0	0	0	0	0	0	0	0	0	0	0	0	0	0	0	0	0	705557	99355	1234	24
Candidatus_Blochmannia_pennsylvanicus_BPEN	chromosome	Gammaproteobacteria	NC_007292	0	0	0	0	0	0	0	0	0	0	0	0	0	0	0	0	0	0	0	0	0	0	0	791654	135892	4026	30
Candidatus_Carsonella_ruddii	chromosome	Gammaproteobacteria	NC_008512	0	0	0	0	0	0	0	0	0	0	0	0	0	0	0	0	0	0	0	0	0	0	0	159662	4220	0	2
Candidatus_Pelagibacter_ubique_HTCC1062	chromosome	Alphaproteobacteria	NC_007205	0	0	0	0	0	0	0	0	0	0	0	0	0	0	0	0	0	0	0	0	0	0	0	1308759	49336	640	14
Candidatus_Ruthia_magnifica_Cm_Calyptogena_magnifica_	chromosome	Gammaproteobacteria	NC_008610	3	3	0	0	0	0	0	0	0	0	0	0	3	3	0	0	0	0	1	0	0	416	416	1160782	108446	27946	23
Candidatus_Vesicomyosocius_okutanii_HA	chromosome	Gammaproteobacteria	NC_009465	1	1	0	0	0	0	0	0	0	0	0	0	1	1	0	0	0	0	1	0	1	175	175	1022154	121502	7380	26
Carboxydothermus_hydrogenoformans_Z-2901	chromosome	Firmicutes	NC_007503	4	4	0	0	0	0	0	0	0	0	0	0	4	4	2	0	4	1	1	0	2	1192	1192	2401520	177831	22840	288
Caulobacter_crescentus	chromosome	Alphaproteobacteria	NC_002696	5	5	0	0	0	0	0	0	0	0	0	0	5	5	0	0	2	2	2	1	0	870	870	4016947	352432	17444	428
Chlamydia_muridarum	plasmid_pMoPn	Chlamydiae/Verrucomicrobia	NC_002182	0	0	0	0	0	0	0	0	0	0	0	0	0	0	0	0	0	0	0	0	0	0	0	7501	430	139	0
Chlamydia_muridarum	chromosome	Chlamydiae/Verrucomicrobia	NC_002620	18	18	0	0	0	0	0	0	0	0	0	0	18	18	0	0	1	2	4	0	3	3088	3088	1072950	89781	41757	51
Chlamydia_trachomatis	chromosome	Chlamydiae/Verrucomicrobia	NC_000117	16	16	2	2	0	0	2	0	1	0	0	235	14	14	0	0	0	0	2	0	1	2148	2383	1042519	92541	36816	62
Chlamydia_trachomatis_A_HAR-13	chromosome	Chlamydiae/Verrucomicrobia	NC_007429	17	17	0	0	0	0	0	0	0	0	0	0	17	17	0	0	2	2	2	0	2	2506	2506	1044459	92301	36126	66
Chlamydia_trachomatis_A_HAR-13	plasmid_pCTA	Chlamydiae/Verrucomicrobia	NC_007430	0	0	0	0	0	0	0	0	0	0	0	0	0	0	0	0	0	0	0	0	0	0	0	7510	603	138	0
Chlamydophila_abortus_S26_3	chromosome	Chlamydiae/Verrucomicrobia	NC_004552	10	10	0	0	0	0	0	0	0	0	0	0	10	10	2	0	2	1	2	0	0	1339	1339	1144377	99181	52870	32
Chlamydophila_caviae	chromosome	Chlamydiae/Verrucomicrobia	NC_003361	10	10	0	0	0	0	0	0	0	0	0	0	10	10	4	0	1	2	4	0	1	1492	1492	1173390	103467	52320	51
Chlamydophila_caviae	plasmid_pCpGP1	Chlamydiae/Verrucomicrobia	NC_004720	0	0	0	0	0	0	0	0	0	0	0	0	0	0	0	0	0	0	0	0	0	0	0	7966	1769	0	0
Chlamydophila_felis_Fe_C-56	chromosome	Chlamydiae/Verrucomicrobia	NC_007899	9	9	0	0	0	0	0	0	0	0	0	0	9	9	2	0	0	0	2	0	1	1047	1047	1166239	96655	44202	33
Chlamydophila_felis_Fe_C-56	plasmid_pCfe1	Chlamydiae/Verrucomicrobia	NC_007900	0	0	0	0	0	0	0	0	0	0	0	0	0	0	0	0	0	0	0	0	0	0	0	7552	306	0	1
Chlamydophila_pneumoniae_AR39	chromosome	Chlamydiae/Verrucomicrobia	NC_002179	2	2	0	0	0	0	0	0	0	0	0	0	2	2	1	0	0	0	0	0	0	498	498	1229853	109094	14821	58
Chlamydophila_pneumoniae_CWL029	chromosome	Chlamydiae/Verrucomicrobia	NC_000922	2	2	0	0	0	0	0	0	0	0	0	0	2	2	0	0	0	0	0	0	0	601	601	1230230	116820	14140	55
Chlamydophila_pneumoniae_J138	chromosome	Chlamydiae/Verrucomicrobia	NC_002491	1	1	0	0	0	0	0	0	0	0	0	0	1	1	0	0	0	0	0	0	0	266	266	1226565	118797	5968	58
Chlamydophila_pneumoniae_TW_183	chromosome	Chlamydiae/Verrucomicrobia	NC_005043	2	2	0	0	0	0	0	0	0	0	0	0	2	2	1	0	0	0	0	0	0	498	498	1225935	109657	5197	61
Chlorobium_chlorochromatii_CaD3	chromosome	Bacteroidetes/Chlorobi	NC_007514	2	2	0	0	0	0	0	0	0	0	0	0	2	2	0	0	1	0	0	0	0	665	665	2572079	268921	10969	312
Chlorobium_phaeobacteroides_DSM_266	chromosome	Bacteroidetes/Chlorobi	NC_008639	12	12	0	0	0	0	0	0	0	0	0	0	12	12	1	0	3	0	1	0	5	2415	2415	3133902	380621	28241	294
Chlorobium_tepidum_TLS	chromosome	Bacteroidetes/Chlorobi	NC_002932	4	4	1	1	0	0	0	0	0	0	0	89	3	3	0	0	0	0	0	0	1	825	914	2154946	223811	18059	236
Chromobacterium_violaceum	chromosome	Betaproteobacteria	NC_005085	10	10	1	1	0	0	1	0	0	0	0	185	9	9	0	0	0	2	0	0	1	2233	2418	4751080	479620	14734	705
Chromohalobacter_salexigens_DSM_3043	chromosome	Gammaproteobacteria	NC_007963	6	6	0	0	0	0	0	0	0	0	0	0	6	6	0	0	4	0	2	0	0	1017	1017	3696649	337574	13497	375
Clavibacter_michiganensis_NCPPB_382	plasmid_pCM1	Actinobacteria	NC_009478	0	0	0	0	0	0	0	0	0	0	0	0	0	0	0	0	0	0	0	0	0	0	0	27357	3969	1146	0
Clavibacter_michiganensis_NCPPB_382	plasmid_pCM2	Actinobacteria	NC_009479	0	0	0	0	0	0	0	0	0	0	0	0	0	0	0	0	0	0	0	0	0	0	0	69989	13222	6311	3
Clavibacter_michiganensis_NCPPB_382	chromosome	Actinobacteria	NC_009480	3	3	0	0	0	0	0	0	0	0	0	0	3	3	0	0	2	1	0	0	0	924	924	3297891	271673	29313	60
Clostridium_acetobutylicum	plasmid_pSOL1	Firmicutes	NC_001988	2	2	0	0	0	0	0	0	0	0	0	0	2	2	0	0	0	0	0	0	2	583	583	192000	27626	831	26
Clostridium_acetobutylicum	chromosome	Firmicutes	NC_003030	18	18	13	13	2	0	13	12	6	9	13	3814	5	5	0	0	1	0	1	0	4	891	4705	3940880	466683	28004	377
Clostridium_beijerinckii_NCIMB_8052	chromosome	Firmicutes	NC_009617	31	30	0	0	0	0	0	0	0	0	0	0	31	30	2	1	22	5	4	4	21	8145	8145	6000632	1050580	39759	1041
Clostridium_botulinum_A	chromosome	Firmicutes	NC_009495	54	24	0	0	0	0	0	0	0	0	0	0	54	24	4	30	19	11	13	12	29	11345	11345	3886916	624943	46547	678
Clostridium_botulinum_A	plasmid_pBOT3502	Firmicutes	NC_009496	0	0	0	0	0	0	0	0	0	0	0	0	0	0	0	0	0	0	0	0	0	0	0	16344	3173	0	4
Clostridium_botulinum_A_ATCC_19397	chromosome	Firmicutes	NC_009697	60	30	0	0	0	0	0	0	0	0	0	0	60	30	3	30	22	14	16	12	31	12267	12267	3863450	631080	54484	682
Clostridium_botulinum_A_Hall	chromosome	Firmicutes	NC_009698	60	30	0	0	0	0	0	0	0	0	0	0	60	30	3	30	22	14	17	12	29	12146	12146	3760560	618385	63803	673
Clostridium_botulinum_F_Langeland	chromosome	Firmicutes	NC_009699	68	28	0	0	0	0	0	0	0	0	0	0	68	28	3	40	20	14	6	11	36	14275	14275	3995387	659274	61645	733
Clostridium_botulinum_F_Langeland	plasmid_pCLI	Firmicutes	NC_009700	0	0	0	0	0	0	0	0	0	0	0	0	0	0	0	0	0	0	0	0	0	0	0	17531	4560	0	5
Clostridium_difficile_630	plasmid_pCD630	Firmicutes	NC_008226	0	0	0	0	0	0	0	0	0	0	0	0	0	0	0	0	0	0	0	0	0	0	0	7881	0	0	0
Clostridium_difficile_630	chromosome	Firmicutes	NC_009089	2	2	0	0	0	0	0	0	0	0	0	0	2	2	0	0	2	2	2	0	1	548	548	4290252	59122	36547	62
Clostridium_kluyveri_DSM_555	plasmid_pCKL555A	Firmicutes	NC_009466	0	0	0	0	0	0	0	0	0	0	0	0	0	0	0	0	0	0	0	0	0	0	0	59182	6816	0	4
Clostridium_kluyveri_DSM_555	chromosome	Firmicutes	NC_009706	46	35	0	0	0	0	0	0	0	0	0	0	46	35	4	11	29	11	7	11	34	10816	10816	3964618	557416	41035	483
Clostridium_novyi_NT	chromosome	Firmicutes	NC_008593	26	26	0	0	0	0	0	0	0	0	0	0	26	26	8	0	14	6	6	4	20	5492	5492	2547720	275604	22320	379
Clostridium_perfringens	plasmid_pCP13	Firmicutes	NC_003042	0	0	0	0	0	0	0	0	0	0	0	0	0	0	0	0	0	0	0	0	0	0	0	54310	8319	0	20
Clostridium_perfringens	chromosome	Firmicutes	NC_003366	18	18	12	12	1	0	9	6	3	5	8	3572	6	6	0	0	2	1	1	0	6	1500	5072	3031430	438796	11892	496
Clostridium_perfringens_ATCC_13124	chromosome	Firmicutes	NC_008261	17	17	0	0	0	0	0	0	0	0	0	0	17	17	1	0	10	5	3	2	15	4443	4443	3256683	466377	25141	536
Clostridium_perfringens_SM101	chromosome	Firmicutes	NC_008262	14	14	0	0	0	0	0	0	0	0	0	0	14	14	1	0	9	2	1	3	11	4048	4048	2897393	445749	31933	451
Clostridium_perfringens_SM101	plasmid_1	Firmicutes	NC_008263	0	0	0	0	0	0	0	0	0	0	0	0	0	0	0	0	0	0	0	0	0	0	0	12397	1945	0	1
Clostridium_perfringens_SM101	plasmid_2	Firmicutes	NC_008264	0	0	0	0	0	0	0	0	0	0	0	0	0	0	0	0	0	0	0	0	0	0	0	12206	3691	0	2
Clostridium_perfringens_SM101	phage	Firmicutes	NC_008265	0	0	0	0	0	0	0	0	0	0	0	0	0	0	0	0	0	0	0	0	0	0	0	38092	4345	4632	7
Clostridium_tetani_E88	chromosome	Firmicutes	NC_004557	45	33	18	15	5	3	14	13	10	9	15	4720	27	18	1	9	13	2	9	4	21	6466	11186	2799251	328101	40790	364
Clostridium_tetani_E88	plasmid_pE88	Firmicutes	NC_004565	0	0	0	0	0	0	0	0	0	0	0	0	0	0	0	0	0	0	0	0	0	0	0	74082	12949	0	10
Clostridium_thermocellum_ATCC_27405	chromosome	Firmicutes	NC_009012	6	6	0	0	0	0	0	0	0	0	0	0	6	6	2	0	4	0	1	0	5	1468	1468	3843301	507427	36129	531
Colwellia_psychrerythraea_34H	chromosome	Gammaproteobacteria	NC_003910	8	7	1	1	0	0	1	0	0	0	0	72	7	6	2	1	2	1	1	1	3	2152	2224	5373180	739585	32684	747
Corynebacterium_diphtheriae	chromosome	Actinobacteria	NC_002935	6	6	1	1	0	0	1	0	1	0	0	279	5	5	0	0	0	0	1	0	1	694	973	2488635	222394	27461	161
Corynebacterium_efficiens_YS-314	chromosome	Actinobacteria	NC_004369	20	20	2	2	0	0	1	0	0	0	0	461	18	18	0	0	1	1	4	1	0	3630	4091	3147090	269234	28306	277
Corynebacterium_glutamicum_ATCC_13032_Bielefeld	chromosome	Actinobacteria	NC_006958	17	17	2	2	0	0	0	0	1	0	0	460	15	15	1	0	0	1	3	0	0	3064	3524	3282708	363954	16916	378
Corynebacterium_glutamicum_ATCC_13032_Kitasato	chromosome	Actinobacteria	NC_003450	18	18	2	2	0	0	0	0	1	0	0	462	16	16	1	0	0	1	3	0	0	3352	3814	3309401	394148	19344	408
Corynebacterium_glutamicum_R	chromosome	Actinobacteria	NC_009342	16	16	0	0	0	0	0	0	0	0	0	0	16	16	3	0	0	1	5	0	0	3166	3166	3314179	290301	33495	287
Corynebacterium_glutamicum_R	plasmid_pCGR1	Actinobacteria	NC_009343	0	0	0	0	0	0	0	0	0	0	0	0	0	0	0	0	0	0	0	0	0	0	0	49120	6169	0	5
Corynebacterium_jeikeium_K411	plasmid_pKW4	Actinobacteria	NC_003080	0	0	0	0	0	0	0	0	0	0	0	0	0	0	0	0	0	0	0	0	0	0	0	14323	4098	0	1
Corynebacterium_jeikeium_K411	chromosome	Actinobacteria	NC_007164	5	5	1	1	1	0	1	0	0	0	0	282	4	4	0	0	1	0	1	0	0	646	928	2462499	227240	10058	208
Coxiella_burnetii	chromosome	Gammaproteobacteria	NC_002971	0	0	0	0	0	0	0	0	0	0	0	0	0	0	0	0	0	0	0	0	0	0	0	1995281	200315	30498	125
Coxiella_burnetii	plasmid_pQpH1	Gammaproteobacteria	NC_004704	0	0	0	0	0	0	0	0	0	0	0	0	0	0	0	0	0	0	0	0	0	0	0	37393	7726	325	2
Coxiella_burnetii_Dugway_7E9-12	plasmid_pQpDG	Gammaproteobacteria	NC_009726	0	0	0	0	0	0	0	0	0	0	0	0	0	0	0	0	0	0	0	0	0	0	0	54179	9649	0	2
Coxiella_burnetii_Dugway_7E9-12	chromosome	Gammaproteobacteria	NC_009727	0	0	0	0	0	0	0	0	0	0	0	0	0	0	0	0	0	0	0	0	0	0	0	2158758	210075	33769	139
Cyanobacteria_bacterium_Yellowstone_A-Prime	chromosome	Cyanobacteria	NC_007775	0	0	0	0	0	0	0	0	0	0	0	0	0	0	0	0	0	0	0	0	0	0	0	2932766	365443	15431	190
Cyanobacteria_bacterium_Yellowstone_B-Prime	chromosome	Cyanobacteria	NC_007776	0	0	0	0	0	0	0	0	0	0	0	0	0	0	0	0	0	0	0	0	0	0	0	3046682	401157	6429	199
Cytophaga_hutchinsonii_ATCC_33406	chromosome	Bacteroidetes/Chlorobi	NC_008255	0	0	0	0	0	0	0	0	0	0	0	0	0	0	0	0	0	0	0	0	0	0	0	4433218	412039	4008	545
Dechloromonas_aromatica_RCB	chromosome	Betaproteobacteria	NC_007298	4	4	2	2	0	0	0	1	1	0	1	331	2	2	0	0	1	0	0	0	0	236	567	4501104	331901	13595	428
Dehalococcoides_BAV1	chromosome	Chloroflexi	NC_009455	61	61	0	0	0	0	0	0	0	0	0	0	61	61	4	0	3	3	14	1	24	10231	10231	1341892	122596	70077	117
Dehalococcoides_CBDB1	chromosome	Chloroflexi	NC_007356	56	56	5	5	2	0	3	0	2	0	2	1193	51	51	3	0	0	4	13	1	20	8202	9395	1395502	129653	74797	127
Dehalococcoides_ethenogenes_195	chromosome	Chloroflexi	NC_002936	29	29	0	0	0	0	0	0	0	0	0	0	29	29	1	0	2	1	14	1	14	6127	6127	1469720	127639	44514	131
Deinococcus_geothermalis_DSM_11300	plasmid_1	Deinococcus-Thermus	NC_008010	0	0	0	0	0	0	0	0	0	0	0	0	0	0	0	0	0	0	0	0	0	0	0	574127	53584	3021	29
Deinococcus_geothermalis_DSM_11300	chromosome	Deinococcus-Thermus	NC_008025	5	5	0	0	0	0	0	0	0	0	0	0	5	5	1	0	4	1	0	0	1	1421	1421	2467205	214733	6359	187
Deinococcus_radiodurans	plasmid_MP1	Deinococcus-Thermus	NC_000958	0	0	0	0	0	0	0	0	0	0	0	0	0	0	0	0	0	0	0	0	0	0	0	177466	18169	3086	13
Deinococcus_radiodurans	plasmid_CP1	Deinococcus-Thermus	NC_000959	0	0	0	0	0	0	0	0	0	0	0	0	0	0	0	0	0	0	0	0	0	0	0	45704	6051	910	1
Deinococcus_radiodurans	chromosome_1	Deinococcus-Thermus	NC_001263	3	3	3	3	0	0	2	0	0	0	0	418	0	0	0	0	0	0	0	0	0	0	418	2648638	242952	12012	337
Deinococcus_radiodurans	chromosome_2	Deinococcus-Thermus	NC_001264	1	1	1	1	0	0	1	1	0	0	1	232	0	0	0	0	0	0	0	0	0	0	232	412348	30041	1551	41
Desulfitobacterium_hafniense_Y51	chromosome	Firmicutes	NC_007907	7	7	0	0	0	0	0	0	0	0	0	0	7	7	0	0	1	1	1	0	0	1623	1623	5727534	774337	23843	1138
Desulfotalea_psychrophila_LSv54	chromosome	Deltaproteobacteria	NC_006138	4	4	1	1	0	0	1	0	0	0	0	411	3	3	0	0	1	0	0	0	1	225	636	3523383	456770	2946	379
Desulfotalea_psychrophila_LSv54	plasmid_large	Deltaproteobacteria	NC_006139	0	0	0	0	0	0	0	0	0	0	0	0	0	0	0	0	0	0	0	0	0	0	0	121587	17084	712	4
Desulfotalea_psychrophila_LSv54	plasmid_small	Deltaproteobacteria	NC_006140	0	0	0	0	0	0	0	0	0	0	0	0	0	0	0	0	0	0	0	0	0	0	0	14664	4000	0	2
Desulfotomaculum_reducens_MI-1	chromosome	Firmicutes	NC_009253	14	14	0	0	0	0	0	0	0	0	0	0	14	14	2	0	11	1	1	2	3	3268	3268	3608104	481408	31184	674
Desulfovibrio_desulfuricans_G20	chromosome	Deltaproteobacteria	NC_007519	5	5	0	0	0	0	0	0	0	0	0	0	5	5	0	0	0	0	2	0	0	755	755	3730232	329696	7731	756
Desulfovibrio_vulgaris_DP4	plasmid_pDVUL01	Deltaproteobacteria	NC_008741	0	0	0	0	0	0	0	0	0	0	0	0	0	0	0	0	0	0	0	0	0	0	0	198504	19816	3240	8
Desulfovibrio_vulgaris_DP4	chromosome	Deltaproteobacteria	NC_008751	2	2	0	0	0	0	0	0	0	0	0	0	2	2	0	0	1	0	0	0	1	529	529	3462887	452261	2125	640
Desulfovibrio_vulgaris_Hildenborough	chromosome	Deltaproteobacteria	NC_002937	1	1	1	1	0	0	1	0	0	0	0	182	0	0	0	0	0	0	0	0	0	0	182	3570858	437168	15766	593
Desulfovibrio_vulgaris_Hildenborough	megaplasmid	Deltaproteobacteria	NC_005863	0	0	0	0	0	0	0	0	0	0	0	0	0	0	0	0	0	0	0	0	0	0	0	202301	26672	2108	8
Dichelobacter_nodosus_VCS1703A	chromosome	Gammaproteobacteria	NC_009446	5	5	0	0	0	0	0	0	0	0	0	0	5	5	0	0	2	0	0	0	1	572	572	1389350	96845	7505	128
Ehrlichia_canis_Jake	chromosome	Alphaproteobacteria	NC_007354	0	0	0	0	0	0	0	0	0	0	0	0	0	0	0	0	0	0	0	0	0	0	0	1315030	238942	14643	10
Ehrlichia_chaffeensis_Arkansas	chromosome	Alphaproteobacteria	NC_007799	2	2	0	0	0	0	0	0	0	0	0	0	2	2	0	0	1	0	1	0	1	373	373	1176248	219119	5688	15
Ehrlichia_ruminantium_Gardel	chromosome	Alphaproteobacteria	NC_006831	0	0	0	0	0	0	0	0	0	0	0	0	0	0	0	0	0	0	0	0	0	0	0	1499920	193045	5565	13
Ehrlichia_ruminantium_str._Welgevonden	chromosome	Alphaproteobacteria	NC_006832	0	0	0	0	0	0	0	0	0	0	0	0	0	0	0	0	0	0	0	0	0	0	0	1512977	195232	4300	15
Ehrlichia_ruminantium_Welgevonden	chromosome	Alphaproteobacteria	NC_005295	0	0	0	0	0	0	0	0	0	0	0	0	0	0	0	0	0	0	0	0	0	0	0	1516355	167417	7124	12
Enterobacter_638	plasmid_pENTE01	Gammaproteobacteria	NC_009425	7	7	0	0	0	0	0	0	0	0	0	0	7	7	2	0	0	0	0	0	0	1066	1066	157749	21159	4106	20
Enterobacter_638	chromosome	Gammaproteobacteria	NC_009436	108	107	0	0	0	0	0	0	0	0	0	0	108	107	13	1	33	27	19	3	21	16806	16806	4518712	485771	146087	588
Enterococcus_faecalis_V583	chromosome	Firmicutes	NC_004668	14	14	6	6	0	0	6	4	1	3	2	1314	8	8	0	0	0	0	1	0	2	1550	2864	3218031	341825	47004	482
Enterococcus_faecalis_V583	plasmid_pTEF1	Firmicutes	NC_004669	2	2	0	0	0	0	0	0	0	0	0	0	2	2	0	0	0	0	0	0	1	520	520	66320	10690	1009	22
Enterococcus_faecalis_V583	plasmid_pTEF3	Firmicutes	NC_004670	0	0	0	0	0	0	0	0	0	0	0	0	0	0	0	0	0	0	0	0	0	0	0	17963	3216	886	5
Enterococcus_faecalis_V583	plasmid_pTEF2	Firmicutes	NC_004671	1	1	0	0	0	0	0	0	0	0	0	0	1	1	0	0	0	0	0	0	0	295	295	57660	6815	291	13
Erwinia_carotovora_atroseptica_SCRI1043	chromosome	Gammaproteobacteria	NC_004547	50	39	6	6	3	0	5	3	0	0	1	1005	44	33	6	11	7	6	6	1	3	5897	6902	5064019	312506	97787	303
Erythrobacter_litoralis_HTCC2594	chromosome	Alphaproteobacteria	NC_007722	2	2	0	0	0	0	0	0	0	0	0	0	2	2	1	0	0	0	0	0	0	591	591	3052398	223396	6241	190
Escherichia_coli_536	chromosome	Gammaproteobacteria	NC_008253	309	254	0	0	0	0	0	0	0	0	0	0	309	254	44	55	100	54	73	10	60	45463	45463	4938920	516518	372810	518
Escherichia_coli_APEC_O1	chromosome	Gammaproteobacteria	NC_008563	350	298	0	0	0	0	0	0	0	0	0	0	350	298	52	52	100	47	72	14	56	53336	53336	5082025	572002	407994	631
Escherichia_coli_CFT073	chromosome	Gammaproteobacteria	NC_004431	349	246	29	28	10	1	28	25	5	2	11	5169	320	218	38	102	71	21	62	10	51	43398	48567	5231428	515086	358909	608
Escherichia_coli_K12	chromosome	Gammaproteobacteria	NC_000913	401	308	54	52	9	2	42	4	9	1	22	10284	347	256	65	91	101	5	57	15	41	52065	62349	4639675	512651	485417	578
Escherichia_coli_O157H7	plasmid_pOSAK1	Gammaproteobacteria	NC_002127	0	0	0	0	0	0	0	0	0	0	0	0	0	0	0	0	0	0	0	0	0	0	0	3306	1562	1327	1
Escherichia_coli_O157H7	plasmid_pO157	Gammaproteobacteria	NC_002128	3	3	0	0	0	0	0	0	0	0	0	0	3	3	0	0	0	0	0	0	0	629	629	92721	12800	10963	16
Escherichia_coli_O157H7	chromosome	Gammaproteobacteria	NC_002695	403	331	30	30	9	0	29	29	3	0	11	5101	373	301	69	72	77	29	74	19	58	54683	59784	5498450	596124	493118	653
Escherichia_coli_O157H7_EDL933	chromosome	Gammaproteobacteria	NC_002655	434	350	33	33	9	0	32	31	4	1	12	5783	401	317	73	84	81	31	80	22	67	60884	66667	5528445	646005	443416	705
Escherichia_coli_O157H7_EDL933	plasmid_pO157	Gammaproteobacteria	NC_007414	6	6	0	0	0	0	0	0	0	0	0	0	6	6	0	0	0	0	0	0	0	786	786	92077	12910	5632	18
Escherichia_coli_UTI89	plasmid_pUTI89	Gammaproteobacteria	NC_007941	7	7	0	0	0	0	0	0	0	0	0	0	7	7	0	0	0	0	1	0	2	1132	1132	114230	13820	12481	21
Escherichia_coli_UTI89	chromosome	Gammaproteobacteria	NC_007946	282	235	0	0	0	0	0	0	0	0	0	0	282	235	35	47	92	43	66	10	44	39942	39942	5065741	456194	316909	524
Fervidobacterium_nodosum_Rt17-B1	chromosome	Thermotogae	NC_009718	0	0	0	0	0	0	0	0	0	0	0	0	0	0	0	0	0	0	0	0	0	0	0	1948941	55943	29822	77
Flavobacterium_johnsoniae_UW101	chromosome	Bacteroidetes/Chlorobi	NC_009441	10	10	0	0	0	0	0	0	0	0	0	0	10	10	1	0	2	1	1	0	6	2347	2347	6096872	676086	15204	886
Flavobacterium_psychrophilum_JIP02_86	chromosome	Bacteroidetes/Chlorobi	NC_009613	4	4	0	0	0	0	0	0	0	0	0	0	4	4	1	0	1	2	1	0	2	919	919	2861988	297039	34862	313
Francisella_tularensis_FSC_198	chromosome	Gammaproteobacteria	NC_008245	0	0	0	0	0	0	0	0	0	0	0	0	0	0	0	0	0	0	0	0	0	0	0	1892616	164713	58478	11
Francisella_tularensis_holarctica	chromosome	Gammaproteobacteria	NC_007880	0	0	0	0	0	0	0	0	0	0	0	0	0	0	0	0	0	0	0	0	0	0	0	1895994	188646	43329	13
Francisella_tularensis_holarctica_OSU18	chromosome_1_linear	Gammaproteobacteria	NC_008369	0	0	0	0	0	0	0	0	0	0	0	0	0	0	0	0	0	0	0	0	0	0	0	1895727	158472	98357	13
Francisella_tularensis_novicida_U112	chromosome	Gammaproteobacteria	NC_008601	0	0	0	0	0	0	0	0	0	0	0	0	0	0	0	0	0	0	0	0	0	0	0	1910031	153665	17630	29
Francisella_tularensis_tularensis	chromosome_1_linear	Gammaproteobacteria	NC_006570	0	0	0	0	0	0	0	0	0	0	0	0	0	0	0	0	0	0	0	0	0	0	0	1892819	165471	58477	11
Francisella_tularensis_WY96-3417	chromosome	Gammaproteobacteria	NC_009257	0	0	0	0	0	0	0	0	0	0	0	0	0	0	0	0	0	0	0	0	0	0	0	1898476	159828	50891	8
Frankia_alni_ACN14a	chromosome	Actinobacteria	NC_008278	21	21	0	0	0	0	0	0	0	0	0	0	21	21	0	0	1	7	1	0	0	4663	4663	7497934	974262	100817	266
Frankia_CcI3	chromosome	Actinobacteria	NC_007777	23	23	0	0	0	0	0	0	0	0	0	0	23	23	0	0	1	4	1	0	0	4153	4153	5433628	721963	109630	227
Fusobacterium_nucleatum	chromosome	Fusobacteria	NC_003454	0	0	0	0	0	0	0	0	0	0	0	0	0	0	0	0	0	0	0	0	0	0	0	2174500	186316	16449	89
Geobacillus_kaustophilus_HTA426	plasmid_pHTA426	Firmicutes	NC_006509	1	1	0	0	0	0	0	0	0	0	0	0	1	1	0	0	0	0	0	0	0	252	252	47890	6665	2077	4
Geobacillus_kaustophilus_HTA426	chromosome	Firmicutes	NC_006510	129	119	23	23	8	0	17	17	10	11	15	4918	106	96	7	10	6	5	12	2	17	15741	20659	3544776	455292	95878	731
Geobacillus_thermodenitrificans_NG80-2	chromosome	Firmicutes	NC_009328	121	112	0	0	0	0	0	0	0	0	0	0	121	112	18	9	31	24	29	8	30	21336	21336	3550319	464212	102741	739
Geobacillus_thermodenitrificans_NG80-2	plasmid_pLW1071	Firmicutes	NC_009329	3	3	0	0	0	0	0	0	0	0	0	0	3	3	0	0	0	0	1	0	0	563	563	57693	8580	1377	9
Geobacter_metallireducens_GS-15	plasmid_unnamed	Deltaproteobacteria	NC_007515	0	0	0	0	0	0	0	0	0	0	0	0	0	0	0	0	0	0	0	0	0	0	0	13762	3708	0	7
Geobacter_metallireducens_GS-15	chromosome	Deltaproteobacteria	NC_007517	24	21	2	2	0	0	0	0	0	0	1	270	22	19	2	3	4	2	6	2	11	4490	4760	3997420	338220	20539	419
Geobacter_sulfurreducens	chromosome	Deltaproteobacteria	NC_002939	21	21	5	5	2	0	4	2	2	0	2	1140	16	16	2	0	0	0	3	2	5	3136	4276	3814139	327109	40712	399
Geobacter_uraniumreducens_Rf4	chromosome	Deltaproteobacteria	NC_009483	44	36	0	0	0	0	0	0	0	0	0	0	44	36	5	8	5	1	6	1	14	9052	9052	5136364	611750	34717	725
Gloeobacter_violaceus	chromosome	Cyanobacteria	NC_005125	0	0	0	0	0	0	0	0	0	0	0	0	0	0	0	0	0	0	0	0	0	0	0	4659019	452684	1102	312
Gluconobacter_oxydans_621H	plasmid_pGOX1	Alphaproteobacteria	NC_006672	0	0	0	0	0	0	0	0	0	0	0	0	0	0	0	0	0	0	0	0	0	0	0	163186	20540	0	13
Gluconobacter_oxydans_621H	plasmid_pGOX2	Alphaproteobacteria	NC_006673	1	1	0	0	0	0	0	0	0	0	0	0	1	1	0	0	0	0	0	0	0	90	90	26568	7536	420	3
Gluconobacter_oxydans_621H	plasmid_pGOX3	Alphaproteobacteria	NC_006674	0	0	0	0	0	0	0	0	0	0	0	0	0	0	0	0	0	0	0	0	0	0	0	14547	2830	0	0
Gluconobacter_oxydans_621H	plasmid_pGOX4	Alphaproteobacteria	NC_006675	0	0	0	0	0	0	0	0	0	0	0	0	0	0	0	0	0	0	0	0	0	0	0	13223	4003	0	0
Gluconobacter_oxydans_621H	plasmid_pGOX5	Alphaproteobacteria	NC_006676	0	0	0	0	0	0	0	0	0	0	0	0	0	0	0	0	0	0	0	0	0	0	0	2687	1267	0	1
Gluconobacter_oxydans_621H	chromosome	Alphaproteobacteria	NC_006677	5	5	0	0	0	0	0	0	0	0	0	0	5	5	0	0	0	0	0	0	0	844	844	2702173	248821	6166	252
Gramella_forsetii_KT0803	chromosome	Bacteroidetes/Chlorobi	NC_008571	2	2	0	0	0	0	0	0	0	0	0	0	2	2	0	0	0	0	0	0	0	515	515	3798465	344379	2129	293
Granulobacter_bethesdensis_CGDNIH1	chromosome	Alphaproteobacteria	NC_008343	5	5	0	0	0	0	0	0	0	0	0	0	5	5	0	0	0	0	0	0	0	1147	1147	2708355	199634	8299	234
Haemophilus_ducreyi_35000HP	chromosome	Gammaproteobacteria	NC_002940	15	15	3	3	0	0	3	0	1	0	1	626	12	12	0	0	2	1	2	1	7	2247	2873	1698955	157855	50411	182
Haemophilus_influenzae	chromosome	Gammaproteobacteria	NC_000907	6	6	0	0	0	0	0	0	0	0	0	0	6	6	0	0	2	2	1	0	3	2105	2105	1830138	181445	43049	274
Haemophilus_influenzae_86_028NP	chromosome	Gammaproteobacteria	NC_007146	18	18	1	1	0	0	1	0	0	0	1	286	17	17	5	0	0	1	2	2	7	2370	2656	1913428	183275	28233	318
Haemophilus_influenzae_PittEE	chromosome	Gammaproteobacteria	NC_009566	12	12	0	0	0	0	0	0	0	0	0	0	12	12	0	0	1	2	3	1	10	2165	2165	1813033	176785	94025	242
Haemophilus_influenzae_PittGG	chromosome	Gammaproteobacteria	NC_009567	6	6	0	0	0	0	0	0	0	0	0	0	6	6	0	0	1	3	0	0	3	1248	1248	1887192	187275	117767	260
Haemophilus_somnus_129PT	plasmid_pHS129	Gammaproteobacteria	NC_006298	0	0	0	0	0	0	0	0	0	0	0	0	0	0	0	0	0	0	0	0	0	0	0	5178	627	0	0
Haemophilus_somnus_129PT	chromosome	Gammaproteobacteria	NC_008309	10	10	0	0	0	0	0	0	0	0	0	0	10	10	1	0	3	2	1	1	7	2434	2434	2007700	200167	17937	221
Hahella_chejuensis_KCTC_2396	chromosome	Gammaproteobacteria	NC_007645	15	7	0	0	0	0	0	0	0	0	0	0	15	7	2	8	2	0	2	0	0	1753	1753	7215267	801766	21355	657
Halorhodospira_halophila_SL1	chromosome	Gammaproteobacteria	NC_008789	0	0	0	0	0	0	0	0	0	0	0	0	0	0	0	0	0	0	0	0	0	0	0	2678452	185398	12793	138
Helicobacter_acinonychis_Sheeba	chromosome	Epsilonproteobacteria	NC_008229	12	8	0	0	0	0	0	0	0	0	0	0	12	8	0	4	0	0	2	0	5	1824	1824	1553927	143612	34958	45
Helicobacter_acinonychis_Sheeba	plasmid_pHac1	Epsilonproteobacteria	NC_008230	0	0	0	0	0	0	0	0	0	0	0	0	0	0	0	0	0	0	0	0	0	0	0	3661	1042	584	0
Helicobacter_hepaticus	chromosome	Epsilonproteobacteria	NC_004917	0	0	0	0	0	0	0	0	0	0	0	0	0	0	0	0	0	0	0	0	0	0	0	1799146	115110	1617	9
Helicobacter_pylori_26695	chromosome	Epsilonproteobacteria	NC_000915	10	10	0	0	0	0	0	0	0	0	0	0	10	10	1	0	0	0	0	0	2	1668	1668	1667867	133372	25036	46
Helicobacter_pylori_HPAG1	chromosome	Epsilonproteobacteria	NC_008086	6	6	0	0	0	0	0	0	0	0	0	0	6	6	1	0	1	0	1	0	0	949	949	1596366	119671	19438	42
Helicobacter_pylori_HPAG1	plasmid_pHPAG1	Epsilonproteobacteria	NC_008087	0	0	0	0	0	0	0	0	0	0	0	0	0	0	0	0	0	0	0	0	0	0	0	9370	1661	1141	0
Helicobacter_pylori_J99	chromosome	Epsilonproteobacteria	NC_000921	11	11	0	0	0	0	0	0	0	0	0	0	11	11	0	0	0	0	2	1	3	2272	2272	1643831	136597	27714	44
Herminiimonas_arsenicoxydans	chromosome	Other-Bacteria	NC_009138	64	53	0	0	0	0	0	0	0	0	0	0	64	53	13	11	4	6	15	0	16	11547	11547	3424307	386133	54105	557
Hyphomonas_neptunium_ATCC_15444	chromosome	Alphaproteobacteria	NC_008358	2	2	0	0	0	0	0	0	0	0	0	0	2	2	0	0	1	1	0	0	0	236	236	3705021	325357	12693	312
Idiomarina_loihiensis_L2TR	chromosome	Gammaproteobacteria	NC_006512	1	1	1	1	0	0	1	0	0	0	0	125	0	0	0	0	0	0	0	0	0	0	125	2839318	193906	4782	173
Jannaschia_CCS1	plasmid_plasmid1	Alphaproteobacteria	NC_007801	0	0	0	0	0	0	0	0	0	0	0	0	0	0	0	0	0	0	0	0	0	0	0	86072	8613	312	1
Jannaschia_CCS1	chromosome	Alphaproteobacteria	NC_007802	4	4	0	0	0	0	0	0	0	0	0	0	4	4	0	0	1	0	0	0	0	925	925	4317977	389512	5110	302
Janthinobacterium_Marseille	chromosome	Betaproteobacteria	NC_009659	56	45	0	0	0	0	0	0	0	0	0	0	56	45	11	11	5	4	13	0	13	12113	12113	4110251	408980	46646	527
Kineococcus_radiotolerans_SRS30216	plasmid_pKRAD02	Actinobacteria	NC_009660	0	0	0	0	0	0	0	0	0	0	0	0	0	0	0	0	0	0	0	0	0	0	0	12917	3120	0	1
Kineococcus_radiotolerans_SRS30216	chromosome	Actinobacteria	NC_009664	1	1	0	0	0	0	0	0	0	0	0	0	1	1	0	0	0	0	0	0	0	318	318	4761183	400246	19757	64
Klebsiella_pneumoniae_MGH_78579	chromosome	Gammaproteobacteria	NC_009648	135	135	0	0	0	0	0	0	0	0	0	0	135	135	21	0	44	36	22	2	25	22387	22387	5315120	602565	162013	650
Klebsiella_pneumoniae_MGH_78580	plasmid_pKPN3	Gammaproteobacteria	NC_009649	2	2	0	0	0	0	0	0	0	0	0	0	2	2	0	0	0	0	0	0	0	548	548	175879	26612	18589	17
Klebsiella_pneumoniae_MGH_78581	plasmid_pKPN4	Gammaproteobacteria	NC_009650	6	6	0	0	0	0	0	0	0	0	0	0	6	6	0	0	0	0	0	0	0	1312	1312	107576	14492	7225	22
Klebsiella_pneumoniae_MGH_78582	plasmid_pKPN5	Gammaproteobacteria	NC_009651	9	9	0	0	0	0	0	0	0	0	0	0	9	9	0	0	0	0	0	0	0	924	924	88582	19288	8986	22
Klebsiella_pneumoniae_MGH_78583	plasmid_pKPN6	Gammaproteobacteria	NC_009652	0	0	0	0	0	0	0	0	0	0	0	0	0	0	0	0	0	0	0	0	0	0	0	4259	1520	921	2
Klebsiella_pneumoniae_MGH_78584	plasmid_pKPN7	Gammaproteobacteria	NC_009653	1	1	0	0	0	0	0	0	0	0	0	0	1	1	0	0	0	0	0	0	0	296	296	3478	1764	1050	2
Lactobacillus_acidophilus_NCFM	chromosome	Firmicutes	NC_006814	43	43	14	14	5	0	11	10	8	5	6	2862	29	29	6	0	8	7	17	8	15	6695	9557	1993564	197736	22186	304
Lactobacillus_brevis_ATCC_367	chromosome	Firmicutes	NC_008497	15	15	0	0	0	0	0	0	0	0	0	0	15	15	4	0	6	3	4	3	1	2468	2468	2291220	284732	17547	431
Lactobacillus_brevis_ATCC_367	plasmid_1	Firmicutes	NC_008498	0	0	0	0	0	0	0	0	0	0	0	0	0	0	0	0	0	0	0	0	0	0	0	13413	4819	1334	4
Lactobacillus_brevis_ATCC_367	plasmid_2	Firmicutes	NC_008499	5	5	0	0	0	0	0	0	0	0	0	0	5	5	1	0	0	0	0	0	1	803	803	35595	4846	8338	9
Lactobacillus_casei_ATCC_334	plasmid_1	Firmicutes	NC_008502	2	2	0	0	0	0	0	0	0	0	0	0	2	2	0	0	0	0	0	0	0	271	271	29061	6610	3643	8
Lactobacillus_casei_ATCC_334	chromosome	Firmicutes	NC_008526	5	5	0	0	0	0	0	0	0	0	0	0	5	5	1	0	0	0	2	0	0	687	687	2895264	398231	30026	603
Lactobacillus_delbrueckii_bulgaricus	chromosome	Firmicutes	NC_008054	14	14	0	0	0	0	0	0	0	0	0	0	14	14	5	0	7	6	7	0	6	2564	2564	1864998	189702	59567	289
Lactobacillus_delbrueckii_bulgaricus_ATCC_BAA-365	chromosome	Firmicutes	NC_008529	17	17	0	0	0	0	0	0	0	0	0	0	17	17	6	0	6	6	7	1	6	2822	2822	1856951	209442	47971	308
Lactobacillus_gasseri_ATCC_33323	chromosome	Firmicutes	NC_008530	67	67	0	0	0	0	0	0	0	0	0	0	67	67	11	0	18	18	36	12	21	14572	14572	1894360	158038	53896	230
Lactobacillus_johnsonii_NCC_533	chromosome	Firmicutes	NC_005362	78	78	14	14	5	0	10	10	10	2	4	2917	64	64	9	0	12	13	29	11	17	13183	16100	1992676	177314	37625	287
Lactobacillus_plantarum	chromosome	Firmicutes	NC_004567	30	24	8	8	2	0	5	6	2	0	1	1503	22	16	0	6	2	0	6	3	2	3500	5003	3308274	457355	33578	766
Lactobacillus_plantarum	plasmid_pWCFS101	Firmicutes	NC_006375	0	0	0	0	0	0	0	0	0	0	0	0	0	0	0	0	0	0	0	0	0	0	0	1917	624	0	2
Lactobacillus_plantarum	plasmid_pWCFS102	Firmicutes	NC_006376	0	0	0	0	0	0	0	0	0	0	0	0	0	0	0	0	0	0	0	0	0	0	0	2365	933	0	1
Lactobacillus_plantarum	plasmid_pWCFS103	Firmicutes	NC_006377	1	1	0	0	0	0	0	0	0	0	0	0	1	1	0	0	0	0	0	0	0	91	91	36069	4541	2438	7
Lactobacillus_reuteri_F275	chromosome	Firmicutes	NC_009513	40	18	0	0	0	0	0	0	0	0	0	0	40	18	4	22	7	7	11	5	5	6982	6982	1999618	223287	25085	318
Lactobacillus_sakei_23K	chromosome	Firmicutes	NC_007576	5	5	0	0	0	0	0	0	0	0	0	0	5	5	2	0	3	3	2	1	2	919	919	1884661	208485	5422	322
Lactobacillus_salivarius_UCC118	plasmid_pSF118-20	Firmicutes	NC_006529	1	1	0	0	0	0	0	0	0	0	0	0	1	1	0	0	0	0	0	0	0	356	356	20417	5068	1160	10
Lactobacillus_salivarius_UCC118	plasmid_pSF118-44	Firmicutes	NC_006530	3	3	0	0	0	0	0	0	0	0	0	0	3	3	0	0	0	0	0	0	0	843	843	44013	10334	3415	10
Lactobacillus_salivarius_UCC118	chromosome	Firmicutes	NC_007929	6	6	0	0	0	0	0	0	0	0	0	0	6	6	0	0	3	3	3	0	2	1313	1313	1827111	169651	30123	174
Lactobacillus_salivarius_UCC118	plasmid_pMP118	Firmicutes	NC_007930	0	0	0	0	0	0	0	0	0	0	0	0	0	0	0	0	0	0	0	0	0	0	0	242436	26234	10422	36
Lactococcus_lactis	chromosome	Firmicutes	NC_002662	8	8	4	4	0	0	3	2	0	0	4	1037	4	4	0	0	2	0	3	1	4	904	1941	2365589	280462	10715	333
Lactococcus_lactis_cremoris_MG1363	chromosome	Firmicutes	NC_009004	13	13	0	0	0	0	0	0	0	0	0	0	13	13	2	0	6	2	1	0	4	2312	2312	2529478	327557	55428	366
Lactococcus_lactis_cremoris_SK11	plasmid_1	Firmicutes	NC_008503	0	0	0	0	0	0	0	0	0	0	0	0	0	0	0	0	0	0	0	0	0	0	0	14041	3841	288	2
Lactococcus_lactis_cremoris_SK11	plasmid_2	Firmicutes	NC_008504	0	0	0	0	0	0	0	0	0	0	0	0	0	0	0	0	0	0	0	0	0	0	0	9554	280	252	0
Lactococcus_lactis_cremoris_SK11	plasmid_3	Firmicutes	NC_008505	3	3	0	0	0	0	0	0	0	0	0	0	3	3	0	0	0	0	0	0	2	667	667	74750	15562	4628	20
Lactococcus_lactis_cremoris_SK11	plasmid_4	Firmicutes	NC_008506	2	2	0	0	0	0	0	0	0	0	0	0	2	2	0	0	0	0	0	0	1	342	342	47208	6369	427	12
Lactococcus_lactis_cremoris_SK11	plasmid_5	Firmicutes	NC_008507	0	0	0	0	0	0	0	0	0	0	0	0	0	0	0	0	0	0	0	0	0	0	0	14206	1654	561	2
Lactococcus_lactis_cremoris_SK11	chromosome	Firmicutes	NC_008527	3	3	0	0	0	0	0	0	0	0	0	0	3	3	1	0	2	1	0	0	3	779	779	2438589	295336	39206	358
Lawsonia_intracellularis_PHE_MN1-00	chromosome	Deltaproteobacteria	NC_008011	4	4	0	0	0	0	0	0	0	0	0	0	4	4	0	0	2	0	0	0	0	1136	1136	1457619	185100	8189	93
Lawsonia_intracellularis_PHE_MN1-00	plasmid_1	Deltaproteobacteria	NC_008012	0	0	0	0	0	0	0	0	0	0	0	0	0	0	0	0	0	0	0	0	0	0	0	27048	5145	0	3
Lawsonia_intracellularis_PHE_MN1-00	plasmid_2	Deltaproteobacteria	NC_008013	0	0	0	0	0	0	0	0	0	0	0	0	0	0	0	0	0	0	0	0	0	0	0	39794	4132	3811	1
Lawsonia_intracellularis_PHE_MN1-00	plasmid_3	Deltaproteobacteria	NC_008014	0	0	0	0	0	0	0	0	0	0	0	0	0	0	0	0	0	0	0	0	0	0	0	194553	25694	0	19
Legionella_pneumophila_Corby	chromosome	Gammaproteobacteria	NC_009494	0	0	0	0	0	0	0	0	0	0	0	0	0	0	0	0	0	0	0	0	0	0	0	3576470	391014	39092	95
Legionella_pneumophila_Lens	plasmid_pLPL	Gammaproteobacteria	NC_006366	0	0	0	0	0	0	0	0	0	0	0	0	0	0	0	0	0	0	0	0	0	0	0	59832	7586	3449	0
Legionella_pneumophila_Lens	chromosome	Gammaproteobacteria	NC_006369	0	0	0	0	0	0	0	0	0	0	0	0	0	0	0	0	0	0	0	0	0	0	0	3345687	374485	15259	103
Legionella_pneumophila_Paris	plasmid_pLPP	Gammaproteobacteria	NC_006365	0	0	0	0	0	0	0	0	0	0	0	0	0	0	0	0	0	0	0	0	0	0	0	131885	9902	333	4
Legionella_pneumophila_Paris	chromosome	Gammaproteobacteria	NC_006368	0	0	0	0	0	0	0	0	0	0	0	0	0	0	0	0	0	0	0	0	0	0	0	3503610	393102	11955	119
Legionella_pneumophila_Philadelphia_1	chromosome	Gammaproteobacteria	NC_002942	0	0	0	0	0	0	0	0	0	0	0	0	0	0	0	0	0	0	0	0	0	0	0	3397754	377454	6691	95
Leifsonia_xyli_xyli_CTCB0	chromosome	Actinobacteria	NC_006087	17	17	1	1	0	0	0	0	0	0	0	66	16	16	0	0	0	1	2	0	0	3576	3642	2584158	351132	364792	137
Leptospira_borgpetersenii_serovar_Hardjo-bovis_JB197	chromosome_1	Spirochaetes	NC_008510	34	21	0	0	0	0	0	0	0	0	0	0	34	21	3	13	0	1	5	1	5	7538	7538	3576473	517828	248845	162
Leptospira_borgpetersenii_serovar_Hardjo-bovis_JB197	chromosome_2	Spirochaetes	NC_008511	4	4	0	0	0	0	0	0	0	0	0	0	4	4	0	0	0	0	0	0	1	824	824	299762	43715	22264	21
Leptospira_borgpetersenii_serovar_Hardjo-bovis_L550	chromosome_1	Spirochaetes	NC_008508	28	21	0	0	0	0	0	0	0	0	0	0	28	21	1	7	0	2	3	0	4	6794	6794	3614446	366910	255016	129
Leptospira_borgpetersenii_serovar_Hardjo-bovis_L550	chromosome_2	Spirochaetes	NC_008509	4	4	0	0	0	0	0	0	0	0	0	0	4	4	0	0	0	0	0	0	1	824	824	317336	45432	26628	25
Leptospira_interrogans_serovar_Copenhageni	chromosome_1	Spirochaetes	NC_005823	16	16	0	0	0	0	0	0	0	0	0	0	16	16	2	0	1	0	3	0	1	3015	3015	4277185	613726	231922	156
Leptospira_interrogans_serovar_Copenhageni	chromosome_2	Spirochaetes	NC_005824	1	1	0	0	0	0	0	0	0	0	0	0	1	1	0	0	0	0	0	0	0	106	106	350181	42285	16838	12
Leptospira_interrogans_serovar_Lai	chromosome_1	Spirochaetes	NC_004342	21	21	0	0	0	0	0	0	0	0	0	0	21	21	2	0	0	0	3	0	1	4001	4001	4332241	756884	160652	175
Leptospira_interrogans_serovar_Lai	chromosome_2	Spirochaetes	NC_004343	1	1	0	0	0	0	0	0	0	0	0	0	1	1	0	0	0	0	0	0	0	106	106	358943	59148	10220	12
Leuconostoc_mesenteroides_ATCC_8293	plasmid_pLEUM1	Firmicutes	NC_008496	3	3	0	0	0	0	0	0	0	0	0	0	3	3	0	0	2	0	0	0	1	539	539	37367	8937	2051	11
Leuconostoc_mesenteroides_ATCC_8293	chromosome	Firmicutes	NC_008531	6	6	0	0	0	0	0	0	0	0	0	0	6	6	1	0	5	2	2	0	3	1662	1662	2038396	194659	4153	222
Listeria_innocua	chromosome	Firmicutes	NC_003212	115	115	20	20	3	0	19	19	7	5	9	4820	95	95	9	0	18	9	22	4	19	16035	20855	3011208	287471	174689	220
Listeria_innocua	plasmid_pLI100	Firmicutes	NC_003383	2	2	0	0	0	0	0	0	0	0	0	0	2	2	0	0	1	0	0	0	2	470	470	81905	10885	3076	13
Listeria_monocytogenes	chromosome	Firmicutes	NC_003210	124	122	23	23	3	0	21	13	9	4	10	5756	101	99	8	2	15	8	20	2	22	17777	23533	2944528	287442	164586	236
Listeria_monocytogenes_4b_F2365	chromosome	Firmicutes	NC_002973	94	94	6	6	1	0	6	6	4	1	3	1560	88	88	5	0	25	20	24	5	20	16092	17652	2905187	270670	164006	217
Listeria_welshimeri_serovar_6b_SLCC5334	chromosome	Firmicutes	NC_008555	100	100	0	0	0	0	0	0	0	0	0	0	100	100	8	0	32	26	29	3	26	18594	18594	2814130	281094	142536	204
Magnetococcus_MC-1	chromosome	Other_Bacteria	NC_008576	3	3	0	0	0	0	0	0	0	0	0	0	3	3	2	0	1	0	1	0	0	448	448	4719581	543296	19848	657
Magnetospirillum_magneticum_AMB-1	chromosome	Alphaproteobacteria	NC_007626	1	1	0	0	0	0	0	0	0	0	0	0	1	1	0	0	0	0	1	0	0	226	226	4967148	409232	29756	446
Mannheimia_succiniciproducens_MBEL55E	chromosome	Gammaproteobacteria	NC_006300	7	7	3	3	0	0	3	1	1	0	2	537	4	4	0	0	0	2	1	0	4	630	1167	2314078	207398	20166	331
Maricaulis_maris_MCS10	chromosome	Alphaproteobacteria	NC_008347	0	0	0	0	0	0	0	0	0	0	0	0	0	0	0	0	0	0	0	0	0	0	0	3368780	300499	8989	267
Marinobacter_aquaeolei_VT8	plasmid_pMAQU01	Gammaproteobacteria	NC_008738	1	1	0	0	0	0	0	0	0	0	0	0	1	1	0	0	0	0	0	0	0	264	264	239623	30788	452	25
Marinobacter_aquaeolei_VT8	plasmid_pMAQU02	Gammaproteobacteria	NC_008739	0	0	0	0	0	0	0	0	0	0	0	0	0	0	0	0	0	0	0	0	0	0	0	213290	30504	2521	13
Marinobacter_aquaeolei_VT8	chromosome	Gammaproteobacteria	NC_008740	3	3	0	0	0	0	0	0	0	0	0	0	3	3	3	0	2	0	1	0	1	294	294	4326849	355005	23088	312
Marinomonas_MWYL1	chromosome	Gammaproteobacteria	NC_009654	3	3	0	0	0	0	0	0	0	0	0	0	3	3	0	0	2	0	0	0	1	626	626	5100344	526608	20501	626
Mesoplasma_florum_L1	chromosome	Firmicutes	NC_006055	0	0	0	0	0	0	0	0	0	0	0	0	0	0	0	0	0	0	0	0	0	0	0	793224	42526	1360	26
Mesorhizobium_BNC1	plasmid_1	Alphaproteobacteria	NC_008242	3	3	0	0	0	0	0	0	0	0	0	0	3	3	0	0	0	0	0	0	0	541	541	343931	38556	12590	29
Mesorhizobium_BNC1	plasmid_2	Alphaproteobacteria	NC_008243	1	1	0	0	0	0	0	0	0	0	0	0	1	1	0	0	1	0	0	0	0	143	143	131247	11775	879	7
Mesorhizobium_BNC1	plasmid_3	Alphaproteobacteria	NC_008244	1	1	0	0	0	0	0	0	0	0	0	0	1	1	0	0	0	0	0	0	0	143	143	47561	6697	152	5
Mesorhizobium_BNC1	chromosome	Alphaproteobacteria	NC_008254	19	19	0	0	0	0	0	0	0	0	0	0	19	19	0	0	2	0	2	2	0	3250	3250	4412446	431336	21057	351
Mesorhizobium_loti	chromosome	Alphaproteobacteria	NC_002678	18	18	1	1	0	0	1	0	0	0	0	229	17	17	2	0	2	2	2	0	0	3530	3759	7036071	822277	37977	689
Mesorhizobium_loti	plasmid_pMLa	Alphaproteobacteria	NC_002679	1	1	0	0	0	0	0	0	0	0	0	0	1	1	0	0	1	0	0	0	0	180	180	351911	50791	4214	25
Mesorhizobium_loti	plasmid_pMLb	Alphaproteobacteria	NC_002682	1	1	0	0	0	0	0	0	0	0	0	0	1	1	0	0	0	0	0	0	0	141	141	208315	41458	945	20
Methylibium_petroleiphilum_PM1	chromosome	Betaproteobacteria	NC_008825	11	11	0	0	0	0	0	0	0	0	0	0	11	11	0	0	2	5	2	0	1	2242	2242	4044195	306083	45259	198
Methylibium_petroleiphilum_PM1	plasmid_RPME01	Betaproteobacteria	NC_008826	0	0	0	0	0	0	0	0	0	0	0	0	0	0	0	0	0	0	0	0	0	0	0	599444	67677	8754	41
Methylobacillus_flagellatus_KT	chromosome	Betaproteobacteria	NC_007947	4	4	0	0	0	0	0	0	0	0	0	0	4	4	0	0	2	0	1	0	0	835	835	2971517	263039	13940	296
Methylococcus_capsulatus_Bath	chromosome	Gammaproteobacteria	NC_002977	4	4	0	0	0	0	0	0	0	0	0	0	4	4	0	0	1	0	0	0	0	541	541	3304561	280967	24283	277
Moorella_thermoacetica_ATCC_39073	chromosome	Firmicutes	NC_007644	5	5	0	0	0	0	0	0	0	0	0	0	5	5	1	0	4	2	3	0	3	1361	1361	2628784	295152	20875	458
Mycobacterium_avium_104	chromosome	Actinobacteria	NC_008595	25	18	0	0	0	0	0	0	0	0	0	0	25	18	0	7	3	1	1	0	0	2591	2591	5475491	415021	206829	195
Mycobacterium_avium_paratuberculosis	chromosome	Actinobacteria	NC_002944	21	21	0	0	0	0	0	0	0	0	0	0	21	21	0	0	1	6	3	0	0	3728	3728	4829781	374842	44316	167
Mycobacterium_bovis	chromosome	Actinobacteria	NC_002945	106	104	1	1	0	0	0	0	0	0	0	155	105	103	1	2	2	8	26	1	1	17379	17534	4345492	374676	332334	141
Mycobacterium_bovis_BCG_Pasteur_1173P2	chromosome	Actinobacteria	NC_008769	100	98	0	0	0	0	0	0	0	0	0	0	100	98	1	2	2	6	25	2	1	16555	16555	4374522	370859	330481	134
Mycobacterium_gilvum_PYR-GCK	chromosome	Actinobacteria	NC_009338	34	34	0	0	0	0	0	0	0	0	0	0	34	34	1	0	2	3	9	2	0	6344	6344	5619607	377863	106987	135
Mycobacterium_gilvum_PYR-GCK	plasmid_pMFLV01	Actinobacteria	NC_009339	7	7	0	0	0	0	0	0	0	0	0	0	7	7	0	0	0	0	2	0	0	1235	1235	321253	49949	23830	17
Mycobacterium_gilvum_PYR-GCK	plasmid_pMFLV02	Actinobacteria	NC_009340	0	0	0	0	0	0	0	0	0	0	0	0	0	0	0	0	0	0	0	0	0	0	0	25309	4746	393	2
Mycobacterium_gilvum_PYR-GCK	plasmid_pMFLV03	Actinobacteria	NC_009341	0	0	0	0	0	0	0	0	0	0	0	0	0	0	0	0	0	0	0	0	0	0	0	16660	2403	405	1
Mycobacterium_JLS	chromosome	Actinobacteria	NC_009077	49	49	0	0	0	0	0	0	0	0	0	0	49	49	2	0	0	7	12	1	0	7865	7865	6048425	380558	231783	125
Mycobacterium_KMS	plasmid_pMKMS01	Actinobacteria	NC_008703	6	6	0	0	0	0	0	0	0	0	0	0	6	6	0	0	0	0	1	0	0	1221	1221	302089	43649	29999	19
Mycobacterium_KMS	plasmid_pMKMS02	Actinobacteria	NC_008704	5	5	0	0	0	0	0	0	0	0	0	0	5	5	0	0	0	1	0	0	0	832	832	216763	24654	19286	7
Mycobacterium_KMS	chromosome	Actinobacteria	NC_008705	71	71	0	0	0	0	0	0	0	0	0	0	71	71	4	0	0	8	15	3	1	12734	12734	5737227	359877	279904	110
Mycobacterium_leprae	chromosome	Actinobacteria	NC_002677	7	7	0	0	0	0	0	0	0	0	0	0	7	7	0	0	0	1	0	0	0	1233	1233	3268203	183533	340516	57
Mycobacterium_MCS	chromosome	Actinobacteria	NC_008146	71	71	0	0	0	0	0	0	0	0	0	0	71	71	3	0	0	9	11	1	0	12695	12695	5705448	366306	269205	119
Mycobacterium_MCS	plasmid_Plasmid1	Actinobacteria	NC_008147	5	5	0	0	0	0	0	0	0	0	0	0	5	5	0	0	0	1	0	0	0	585	585	215075	23624	22770	9
Mycobacterium_smegmatis_MC2_155	chromosome	Actinobacteria	NC_008596	20	20	0	0	0	0	0	0	0	0	0	0	20	20	1	0	3	4	1	0	1	2898	2898	6988209	457862	169959	186
Mycobacterium_tuberculosis_CDC1551	chromosome	Actinobacteria	NC_002755	75	72	0	0	0	0	0	0	0	0	0	0	75	72	1	3	1	4	23	0	1	11314	11314	4403837	316817	295062	117
Mycobacterium_tuberculosis_F11	chromosome	Actinobacteria	NC_009565	92	88	0	0	0	0	0	0	0	0	0	0	92	88	1	4	2	6	23	2	2	15456	15456	4424435	376326	294692	148
Mycobacterium_tuberculosis_H37Ra	chromosome	Actinobacteria	NC_009525	95	93	0	0	0	0	0	0	0	0	0	0	95	93	0	2	2	5	27	1	2	16458	16458	4419977	370059	293730	136
Mycobacterium_tuberculosis_H37Rv	chromosome	Actinobacteria	NC_000962	102	100	0	0	0	0	0	0	0	0	0	0	102	100	1	2	2	5	27	1	2	17789	17789	4411532	377921	315426	141
Mycobacterium_ulcerans_Agy99	chromosome	Actinobacteria	NC_008611	39	39	0	0	0	0	0	0	0	0	0	0	39	39	0	0	1	1	8	0	0	5600	5600	5631606	556981	841623	195
Mycobacterium_vanbaalenii_PYR-1	chromosome	Actinobacteria	NC_008726	31	24	0	0	0	0	0	0	0	0	0	0	31	24	1	7	0	2	14	7	0	5355	5355	6491865	459555	127265	177
Mycoplasma_agalactiae_PG2	chromosome	Firmicutes	NC_009497	1	1	0	0	0	0	0	0	0	0	0	0	1	1	0	0	0	0	0	0	0	89	89	877438	93460	2815	50
Mycoplasma_capricolum_ATCC_27343	chromosome	Firmicutes	NC_007633	4	4	0	0	0	0	0	0	0	0	0	0	4	4	0	0	1	1	2	0	2	887	887	1010023	83461	3491	67
Mycoplasma_gallisepticum	chromosome	Firmicutes	NC_004829	1	1	0	0	0	0	0	0	0	0	0	0	1	1	0	0	0	0	0	0	1	275	275	996422	65879	5745	77
Mycoplasma_genitalium	chromosome	Firmicutes	NC_000908	1	1	1	1	0	0	1	0	0	0	0	229	0	0	0	0	0	0	0	0	0	0	229	580076	23252	2495	7
Mycoplasma_hyopneumoniae_232	chromosome	Firmicutes	NC_006360	0	0	0	0	0	0	0	0	0	0	0	0	0	0	0	0	0	0	0	0	0	0	0	892758	78382	0	58
Mycoplasma_hyopneumoniae_7448	chromosome	Firmicutes	NC_007332	1	1	0	0	0	0	0	0	0	0	0	0	1	1	0	0	0	0	1	0	0	67	67	920079	89413	4457	68
Mycoplasma_hyopneumoniae_J	chromosome	Firmicutes	NC_007295	1	1	0	0	0	0	0	0	0	0	0	0	1	1	0	0	0	0	0	0	0	106	106	897405	92946	5710	56
Mycoplasma_mobile_163K	chromosome	Firmicutes	NC_006908	0	0	0	0	0	0	0	0	0	0	0	0	0	0	0	0	0	0	0	0	0	0	0	777079	51558	6047	23
Mycoplasma_mycoides	chromosome	Firmicutes	NC_005364	4	4	1	1	0	0	0	0	1	0	0	182	3	3	0	0	0	0	0	0	0	163	345	1211703	134595	44325	87
Mycoplasma_penetrans	chromosome	Firmicutes	NC_004432	0	0	0	0	0	0	0	0	0	0	0	0	0	0	0	0	0	0	0	0	0	0	0	1358633	143270	289	143
Mycoplasma_pneumoniae	chromosome	Firmicutes	NC_000912	1	1	1	1	0	0	1	0	0	0	0	190	0	0	0	0	0	0	0	0	0	0	190	816394	78480	3452	35
Mycoplasma_pulmonis	chromosome	Firmicutes	NC_002771	1	1	1	1	0	0	1	0	0	0	1	372	0	0	0	0	0	0	0	0	0	0	372	963879	83001	888	53
Mycoplasma_synoviae_53	chromosome	Firmicutes	NC_007294	2	2	1	1	0	0	0	0	0	0	1	443	1	1	0	0	0	0	0	0	0	71	514	799476	58461	2541	78
Myxococcus_xanthus_DK_1622	chromosome	Deltaproteobacteria	NC_008095	2	2	0	0	0	0	0	0	0	0	0	0	2	2	0	0	2	0	0	0	0	531	531	9139763	706061	76752	370
Neisseria_gonorrhoeae_FA_1090	chromosome	Betaproteobacteria	NC_002946	287	158	1	1	1	0	0	0	0	0	1	218	286	157	28	129	5	11	38	19	53	49982	50200	2153922	259704	274425	502
Neisseria_meningitidis_FAM18	chromosome	Betaproteobacteria	NC_008767	256	109	0	0	0	0	0	0	0	0	0	0	256	109	28	147	7	9	27	8	66	51741	51741	2194961	284001	262120	508
Neisseria_meningitidis_MC58	chromosome	Betaproteobacteria	NC_003112	252	115	3	3	1	0	2	0	0	0	3	850	249	112	25	137	6	10	32	8	46	47780	48630	2272360	295090	292245	524
Neisseria_meningitidis_Z2491	chromosome	Betaproteobacteria	NC_003116	16	14	0	0	0	0	0	0	0	0	0	0	16	14	1	2	0	1	3	3	5	3178	3178	2184406	20752	276373	34
Neorickettsia_sennetsu_Miyayama	chromosome	Alphaproteobacteria	NC_007798	0	0	0	0	0	0	0	0	0	0	0	0	0	0	0	0	0	0	0	0	0	0	0	859006	99453	1959	9
Nitratiruptor_SB155-2	chromosome	Epsilonproteobacteria	NC_009662	3	3	0	0	0	0	0	0	0	0	0	0	3	3	0	0	2	0	1	0	1	705	705	1877931	80109	6063	23
Nitrobacter_hamburgensis_X14	plasmid_1	Alphaproteobacteria	NC_007959	2	2	0	0	0	0	0	0	0	0	0	0	2	2	0	0	0	0	0	0	0	376	376	294829	36392	29989	23
Nitrobacter_hamburgensis_X14	plasmid_2	Alphaproteobacteria	NC_007960	3	3	0	0	0	0	0	0	0	0	0	0	3	3	0	0	0	0	1	0	0	374	374	188318	24275	4150	17
Nitrobacter_hamburgensis_X14	plasmid_3	Alphaproteobacteria	NC_007961	2	2	0	0	0	0	0	0	0	0	0	0	2	2	0	0	0	0	0	0	0	548	548	121408	14855	10937	12
Nitrobacter_hamburgensis_X14	chromosome	Alphaproteobacteria	NC_007964	118	79	0	0	0	0	0	0	0	0	0	0	118	79	11	39	1	6	19	10	6	20058	20058	4406967	636695	199756	531
Nitrobacter_winogradskyi_Nb-255	chromosome	Alphaproteobacteria	NC_007406	105	61	0	0	0	0	0	0	0	0	0	0	105	61	3	44	2	9	19	8	2	19859	19859	3402093	488898	134707	394
Nitrosococcus_oceani_ATCC_19707	plasmid_A	Gammaproteobacteria	NC_007483	0	0	0	0	0	0	0	0	0	0	0	0	0	0	0	0	0	0	0	0	0	0	0	40420	8122	0	8
Nitrosococcus_oceani_ATCC_19707	chromosome	Gammaproteobacteria	NC_007484	0	0	0	0	0	0	0	0	0	0	0	0	0	0	0	0	0	0	0	0	0	0	0	3481691	404501	20446	195
Nitrosomonas_europaea	chromosome	Betaproteobacteria	NC_004757	22	22	4	4	1	0	2	2	1	0	0	748	18	18	0	0	1	0	3	2	1	3719	4467	2812094	294429	55803	136
Nitrosomonas_eutropha_C71	plasmid_Plasmid1	Betaproteobacteria	NC_008341	1	1	0	0	0	0	0	0	0	0	0	0	1	1	0	0	0	0	0	0	0	229	229	65132	7438	783	3
Nitrosomonas_eutropha_C71	plasmid_Plasmid2	Betaproteobacteria	NC_008342	0	0	0	0	0	0	0	0	0	0	0	0	0	0	0	0	0	0	0	0	0	0	0	55635	10442	1462	8
Nitrosomonas_eutropha_C71	chromosome	Betaproteobacteria	NC_008344	25	25	0	0	0	0	0	0	0	0	0	0	25	25	3	0	1	1	1	0	6	4890	4890	2661057	313270	60881	130
Nitrosospira_multiformis_ATCC_25196	chromosome_1	Betaproteobacteria	NC_007614	3	3	0	0	0	0	0	0	0	0	0	0	3	3	0	0	3	1	1	0	2	726	726	3184243	416188	2706	232
Nitrosospira_multiformis_ATCC_25196	plasmid_1	Alphaproteobacteria	NC_007615	0	0	0	0	0	0	0	0	0	0	0	0	0	0	0	0	0	0	0	0	0	0	0	18871	3149	0	0
Nitrosospira_multiformis_ATCC_25196	plasmid_2	Alphaproteobacteria	NC_007616	0	0	0	0	0	0	0	0	0	0	0	0	0	0	0	0	0	0	0	0	0	0	0	17036	2996	0	2
Nitrosospira_multiformis_ATCC_25196	plasmid_3	Alphaproteobacteria	NC_007617	0	0	0	0	0	0	0	0	0	0	0	0	0	0	0	0	0	0	0	0	0	0	0	14159	3000	0	2
Nocardia_farcinica_IFM10152	chromosome	Actinobacteria	NC_006361	8	8	1	1	0	0	0	0	0	0	0	262	7	7	0	0	1	2	3	0	0	2073	2335	6021225	517133	18767	218
Nocardia_farcinica_IFM10152	plasmid_pNF1	Actinobacteria	NC_006362	0	0	0	0	0	0	0	0	0	0	0	0	0	0	0	0	0	0	0	0	0	0	0	184026	19126	4072	10
Nocardia_farcinica_IFM10152	plasmid_pNF2	Actinobacteria	NC_006363	0	0	0	0	0	0	0	0	0	0	0	0	0	0	0	0	0	0	0	0	0	0	0	87093	11508	0	6
Nocardioides_JS614	plasmid_pNOCA01	Actinobacteria	NC_008697	0	0	0	0	0	0	0	0	0	0	0	0	0	0	0	0	0	0	0	0	0	0	0	307814	35922	4883	15
Nocardioides_JS614	chromosome	Actinobacteria	NC_008699	2	2	0	0	0	0	0	0	0	0	0	0	2	2	0	0	0	0	0	0	0	383	383	4985871	378765	37290	119
Nostoc_sp	plasmid_pCC7120beta	Cyanobacteria	NC_003240	2	2	0	0	0	0	0	0	0	0	0	0	2	2	0	0	1	0	0	0	0	209	209	186614	27475	5241	13
Nostoc_sp	plasmid_pCC7120zeta	Cyanobacteria	NC_003241	0	0	0	0	0	0	0	0	0	0	0	0	0	0	0	0	0	0	0	0	0	0	0	5584	863	0	1
Nostoc_sp	plasmid_pCC7120gamma	Cyanobacteria	NC_003267	0	0	0	0	0	0	0	0	0	0	0	0	0	0	0	0	0	0	0	0	0	0	0	101965	16281	913	6
Nostoc_sp	plasmid_pCC7120epsilon	Cyanobacteria	NC_003270	0	0	0	0	0	0	0	0	0	0	0	0	0	0	0	0	0	0	0	0	0	0	0	40340	7139	185	2
Nostoc_sp	chromosome	Cyanobacteria	NC_003272	268	203	2	2	0	0	0	0	1	0	1	685	266	201	15	65	5	2	33	14	64	45663	46348	6413771	941633	631049	519
Nostoc_sp	plasmid_pCC7120delta	Cyanobacteria	NC_003273	0	0	0	0	0	0	0	0	0	0	0	0	0	0	0	0	0	0	0	0	0	0	0	55414	12580	976	9
Nostoc_sp	plasmid_pCC7120alpha	Cyanobacteria	NC_003276	2	2	0	0	0	0	0	0	0	0	0	0	2	2	0	0	0	0	0	0	1	439	439	408101	63308	11239	21
Novosphingobium_aromaticivorans_DSM_12444	chromosome	Alphaproteobacteria	NC_007794	8	8	0	0	0	0	0	0	0	0	0	0	8	8	0	0	0	0	3	0	0	1630	1630	3561584	279263	9535	267
Novosphingobium_aromaticivorans_DSM_12444	plasmid_pNL1	Alphaproteobacteria	NC_009426	0	0	0	0	0	0	0	0	0	0	0	0	0	0	0	0	0	0	0	0	0	0	0	184462	11984	5345	5
Novosphingobium_aromaticivorans_DSM_12444	plasmid_pNL2	Alphaproteobacteria	NC_009427	0	0	0	0	0	0	0	0	0	0	0	0	0	0	0	0	0	0	0	0	0	0	0	487268	28234	0	20
Oceanobacillus_iheyensis	chromosome	Firmicutes	NC_004193	21	21	11	11	1	0	11	9	3	4	9	2261	10	10	3	0	2	1	1	1	3	1685	3946	3630528	499860	22539	485
Ochrobactrum_anthropi_ATCC_49188	chromosome_1	Alphaproteobacteria	NC_009667	92	92	0	0	0	0	0	0	0	0	0	0	92	92	9	0	2	7	16	3	6	15720	15720	2887297	354660	112612	401
Ochrobactrum_anthropi_ATCC_49188	chromosome_2	Alphaproteobacteria	NC_009668	19	19	0	0	0	0	0	0	0	0	0	0	19	19	0	0	4	1	4	0	0	3648	3648	1895911	183974	27287	136
Ochrobactrum_anthropi_ATCC_49188	plasmid_pOANT01	Alphaproteobacteria	NC_009669	3	3	0	0	0	0	0	0	0	0	0	0	3	3	0	0	0	0	0	0	0	436	436	170351	22314	6035	18
Ochrobactrum_anthropi_ATCC_49188	plasmid_pOANT02	Alphaproteobacteria	NC_009670	2	2	0	0	0	0	0	0	0	0	0	0	2	2	0	0	1	0	1	0	0	424	424	101491	14910	2826	9
Ochrobactrum_anthropi_ATCC_49188	plasmid_pOANT03	Alphaproteobacteria	NC_009671	0	0	0	0	0	0	0	0	0	0	0	0	0	0	0	0	0	0	0	0	0	0	0	93589	14191	0	6
Ochrobactrum_anthropi_ATCC_49188	plasmid_pOANT04	Alphaproteobacteria	NC_009672	0	0	0	0	0	0	0	0	0	0	0	0	0	0	0	0	0	0	0	0	0	0	0	57138	4140	0	8
Oenococcus_oeni_PSU-1	chromosome	Firmicutes	NC_008528	8	8	0	0	0	0	0	0	0	0	0	0	8	8	0	0	1	0	0	0	1	1227	1227	1780517	178679	28534	146
Onion_yellows_phytoplasma	chromosome	Firmicutes	NC_005303	8	7	0	0	0	0	0	0	0	0	0	0	8	7	0	1	1	0	5	5	3	1525	1525	860631	161696	26163	112
Orientia_tsutsugamushi_Boryong	chromosome	Alphaproteobacteria	NC_009488	0	0	0	0	0	0	0	0	0	0	0	0	0	0	0	0	0	0	0	0	0	0	0	2127051	172556	337852	23
Parabacteroides_distasonis_ATCC_8503	chromosome	Bacteroidetes/Chlorobi	NC_009615	12	12	0	0	0	0	0	0	0	0	0	0	12	12	1	0	0	0	0	0	6	2435	2435	4811379	410249	15547	381
Parachlamydia_sp_UWE25	chromosome	Chlamydiae/Verrucomicrobia	NC_005861	0	0	0	0	0	0	0	0	0	0	0	0	0	0	0	0	0	0	0	0	0	0	0	2414465	285434	5355	69
Paracoccus_denitrificans_PD1222	chromosome_1	Alphaproteobacteria	NC_008686	4	4	0	0	0	0	0	0	0	0	0	0	4	4	1	0	1	0	0	0	0	1059	1059	2852282	239161	28505	238
Paracoccus_denitrificans_PD1222	chromosome_2	Alphaproteobacteria	NC_008687	2	2	0	0	0	0	0	0	0	0	0	0	2	2	0	0	1	0	0	0	0	280	280	1730097	148791	14151	139
Paracoccus_denitrificans_PD1222	plasmid_1	Alphaproteobacteria	NC_008688	0	0	0	0	0	0	0	0	0	0	0	0	0	0	0	0	0	0	0	0	0	0	0	653815	47542	953	34
Parvibaculum_lavamentivorans_DS-1	chromosome	Alphaproteobacteria	NC_009719	16	16	0	0	0	0	0	0	0	0	0	0	16	16	0	0	0	0	3	0	2	2417	2417	3914745	354665	18772	451
Pasteurella_multocida	chromosome	Gammaproteobacteria	NC_002663	12	12	3	3	0	0	3	2	1	0	2	494	9	9	2	0	1	1	2	0	4	1844	2338	2257487	209441	17223	242
Pediococcus_pentosaceus_ATCC_25745	chromosome	Firmicutes	NC_008525	11	11	0	0	0	0	0	0	0	0	0	0	11	11	0	0	5	3	6	1	3	2332	2332	1832387	177068	8236	217
Pelobacter_carbinolicus	chromosome	Deltaproteobacteria	NC_007498	12	5	0	0	0	0	0	0	0	0	0	0	12	5	1	7	3	1	2	1	0	2415	2415	3665893	421213	20745	584
Pelobacter_propionicus_DSM_2379	plasmid_pPRO1	Deltaproteobacteria	NC_008607	0	0	0	0	0	0	0	0	0	0	0	0	0	0	0	0	0	0	0	0	0	0	0	202397	26629	0	20
Pelobacter_propionicus_DSM_2379	plasmid_pPRO2	Deltaproteobacteria	NC_008608	0	0	0	0	0	0	0	0	0	0	0	0	0	0	0	0	0	0	0	0	0	0	0	30722	3192	544	1
Pelobacter_propionicus_DSM_2379	chromosome	Deltaproteobacteria	NC_008609	12	12	0	0	0	0	0	0	0	0	0	0	12	12	5	0	6	2	3	3	5	2767	2767	4008000	413794	19862	502
Pelodictyon_luteolum_DSM_273	chromosome	Bacteroidetes/Chlorobi	NC_007512	9	9	0	0	0	0	0	0	0	0	0	0	9	9	0	0	1	1	2	0	1	1649	1649	2364842	210585	22843	256
Pelotomaculum_thermopropionicum_SI	chromosome	Firmicutes	NC_009454	12	12	0	0	0	0	0	0	0	0	0	0	12	12	1	0	4	2	0	0	0	1972	1972	3025375	378565	46607	560
Photobacterium_profundum_SS9	plasmid_megaplasmid	Gammaproteobacteria	NC_005871	2	2	0	0	0	0	0	0	0	0	0	0	2	2	0	0	0	0	0	0	1	334	334	80033	13331	5771	14
Photobacterium_profundum_SS9	chromosome_1	Gammaproteobacteria	NC_006370	35	14	1	1	1	0	1	0	0	0	0	239	34	13	8	21	0	2	0	1	5	8519	8758	4085304	596490	62960	837
Photobacterium_profundum_SS9	chromosome_2	Gammaproteobacteria	NC_006371	16	16	0	0	0	0	0	0	0	0	0	0	16	16	2	0	0	0	1	1	5	3131	3131	2237943	386195	36031	347
Photorhabdus_luminescens	chromosome	Gammaproteobacteria	NC_005126	27	27	11	11	1	0	7	9	4	0	7	1710	16	16	0	0	5	1	1	0	2	2872	4582	5688987	781020	116518	485
Pirellula_sp	chromosome	Planctomycetes	NC_005027	2	2	1	1	0	0	1	0	0	0	0	122	1	1	0	0	0	0	0	0	0	196	318	7145576	362840	928	330
Polaromonas_JS666	chromosome	Betaproteobacteria	NC_007948	55	35	0	0	0	0	0	0	0	0	0	0	55	35	5	20	2	3	6	2	3	10509	10509	5200264	570164	43702	609
Polaromonas_JS666	plasmid_1	Betaproteobacteria	NC_007949	0	0	0	0	0	0	0	0	0	0	0	0	0	0	0	0	0	0	0	0	0	0	0	360405	52718	2402	31
Polaromonas_JS666	plasmid_2	Betaproteobacteria	NC_007950	0	0	0	0	0	0	0	0	0	0	0	0	0	0	0	0	0	0	0	0	0	0	0	338007	37497	9701	33
Polaromonas_naphthalenivorans_CJ2	plasmid_pPNAP01	Betaproteobacteria	NC_008757	1	1	0	0	0	0	0	0	0	0	0	0	1	1	0	0	0	0	0	0	0	60	60	353291	46290	9149	48
Polaromonas_naphthalenivorans_CJ2	plasmid_pPNAP02	Betaproteobacteria	NC_008758	0	0	0	0	0	0	0	0	0	0	0	0	0	0	0	0	0	0	0	0	0	0	0	190172	26882	4377	11
Polaromonas_naphthalenivorans_CJ2	plasmid_pPNAP03	Betaproteobacteria	NC_008759	0	0	0	0	0	0	0	0	0	0	0	0	0	0	0	0	0	0	0	0	0	0	0	171866	32791	795	16
Polaromonas_naphthalenivorans_CJ2	plasmid_pPNAP04	Betaproteobacteria	NC_008760	1	1	0	0	0	0	0	0	0	0	0	0	1	1	0	0	0	0	0	0	0	105	105	143747	23905	4831	21
Polaromonas_naphthalenivorans_CJ2	plasmid_pPNAP05	Betaproteobacteria	NC_008761	0	0	0	0	0	0	0	0	0	0	0	0	0	0	0	0	0	0	0	0	0	0	0	58808	8813	181	6
Polaromonas_naphthalenivorans_CJ2	plasmid_pPNAP06	Betaproteobacteria	NC_008762	2	2	0	0	0	0	0	0	0	0	0	0	2	2	0	0	0	0	0	0	0	494	494	21611	4129	700	4
Polaromonas_naphthalenivorans_CJ2	plasmid_pPNAP07	Betaproteobacteria	NC_008763	0	0	0	0	0	0	0	0	0	0	0	0	0	0	0	0	0	0	0	0	0	0	0	9898	3703	0	3
Polaromonas_naphthalenivorans_CJ2	plasmid_pPNAP08	Betaproteobacteria	NC_008764	0	0	0	0	0	0	0	0	0	0	0	0	0	0	0	0	0	0	0	0	0	0	0	6459	1477	0	1
Polaromonas_naphthalenivorans_CJ2	chromosome	Betaproteobacteria	NC_008781	29	26	0	0	0	0	0	0	0	0	0	0	29	26	3	3	1	10	4	0	3	4504	4504	4410291	392688	36200	555
Polynucleobacter_QLW-P1DMWA-1	chromosome	Betaproteobacteria	NC_009379	3	3	0	0	0	0	0	0	0	0	0	0	3	3	1	0	1	0	0	0	0	553	553	2159490	141838	1646	152
Porphyromonas_gingivalis_W83	chromosome	Bacteroidetes/Chlorobi	NC_002950	0	0	0	0	0	0	0	0	0	0	0	0	0	0	0	0	0	0	0	0	0	0	0	2343476	257918	14991	314
Prochlorococcus_marinus_AS9601	chromosome	Cyanobacteria	NC_008816	1	1	0	0	0	0	0	0	0	0	0	0	1	1	0	0	0	0	0	0	0	259	259	1669886	140478	1954	29
Prochlorococcus_marinus_CCMP1375	chromosome	Cyanobacteria	NC_005042	0	0	0	0	0	0	0	0	0	0	0	0	0	0	0	0	0	0	0	0	0	0	0	1751080	185439	1877	83
Prochlorococcus_marinus_MED4	chromosome	Cyanobacteria	NC_005072	1	1	0	0	0	0	0	0	0	0	0	0	1	1	0	0	0	0	0	0	0	264	264	1657990	155284	1341	33
Prochlorococcus_marinus_MIT_9301	chromosome	Cyanobacteria	NC_009091	1	1	0	0	0	0	0	0	0	0	0	0	1	1	0	0	0	0	0	0	1	259	259	1641879	140749	749	43
Prochlorococcus_marinus_MIT_9303	chromosome	Cyanobacteria	NC_008820	2	2	0	0	0	0	0	0	0	0	0	0	2	2	0	0	0	0	0	0	1	462	462	2682675	349752	8438	148
Prochlorococcus_marinus_MIT_9312	chromosome	Cyanobacteria	NC_007577	1	1	0	0	0	0	0	0	0	0	0	0	1	1	0	0	0	0	0	0	0	259	259	1709204	163405	3677	38
Prochlorococcus_marinus_MIT_9515	chromosome	Cyanobacteria	NC_008817	1	1	0	0	0	0	0	0	0	0	0	0	1	1	0	0	0	0	0	0	0	261	261	1704176	181428	1035	46
Prochlorococcus_marinus_MIT9313	chromosome	Cyanobacteria	NC_005071	1	1	0	0	0	0	0	0	0	0	0	0	1	1	0	0	0	0	0	0	0	161	161	2410873	321251	6622	160
Prochlorococcus_marinus_NATL1A	chromosome	Cyanobacteria	NC_008819	2	2	0	0	0	0	0	0	0	0	0	0	2	2	0	0	0	0	0	0	0	308	308	1864731	228945	2206	95
Prochlorococcus_marinus_NATL2A	chromosome	Cyanobacteria	NC_007335	2	2	0	0	0	0	0	0	0	0	0	0	2	2	0	0	0	0	0	0	0	407	407	1842899	219449	5124	83
Propionibacterium_acnes_KPA171202	chromosome	Actinobacteria	NC_006085	0	0	0	0	0	0	0	0	0	0	0	0	0	0	0	0	0	0	0	0	0	0	0	2560265	234960	4986	104
Prosthecochloris_vibrioformis_DSM_265	chromosome	Bacteroidetes/Chlorobi	NC_009337	10	10	0	0	0	0	0	0	0	0	0	0	10	10	0	0	1	0	2	0	3	1964	1964	1966858	151051	17914	158
Pseudoalteromonas_atlantica_T6c	chromosome	Gammaproteobacteria	NC_008228	7	7	0	0	0	0	0	0	0	0	0	0	7	7	0	0	1	0	1	0	0	1704	1704	5187005	621633	18863	637
Pseudoalteromonas_haloplanktis_TAC125	chromosome_1	Gammaproteobacteria	NC_007481	34	5	0	0	0	0	0	0	0	0	0	0	34	5	3	29	2	3	2	1	6	5287	5287	3214944	350992	17538	524
Pseudoalteromonas_haloplanktis_TAC125	chromosome_2	Gammaproteobacteria	NC_007482	3	3	0	0	0	0	0	0	0	0	0	0	3	3	1	0	0	0	0	0	1	437	437	635328	77980	3222	104
Pseudomonas_aeruginosa	chromosome	Gammaproteobacteria	NC_002516	32	32	17	17	5	0	16	0	2	0	3	2998	15	15	0	0	5	2	0	0	0	2834	5832	6264404	620880	40053	606
Pseudomonas_aeruginosa_PA7	chromosome	Gammaproteobacteria	NC_009656	35	35	0	0	0	0	0	0	0	0	0	0	35	35	2	0	14	14	2	0	3	6009	6009	6588339	619210	41556	640
Pseudomonas_aeruginosa_UCBPP-PA14	chromosome	Gammaproteobacteria	NC_008463	35	35	0	0	0	0	0	0	0	0	0	0	35	35	6	0	19	16	2	0	5	5717	5717	6537648	627297	55880	622
Pseudomonas_entomophila_L48	chromosome	Gammaproteobacteria	NC_008027	182	132	1	1	0	0	1	0	0	0	0	103	181	131	18	50	18	33	38	16	5	26016	26119	5888780	600260	169448	711
Pseudomonas_fluorescens_Pf-5	chromosome	Gammaproteobacteria	NC_004129	76	72	11	11	4	0	11	11	1	0	2	2007	65	61	4	4	7	16	4	1	3	10149	12156	7074893	685320	80068	774
Pseudomonas_fluorescens_PfO-1	chromosome	Gammaproteobacteria	NC_007492	58	58	0	0	0	0	0	0	0	0	0	0	58	58	6	0	19	20	11	1	7	10608	10608	6438405	600447	61841	779
Pseudomonas_mendocina_ymp	chromosome	Gammaproteobacteria	NC_009439	45	45	0	0	0	0	0	0	0	0	0	0	45	45	5	0	16	15	5	3	7	7648	7648	5072807	480668	52206	540
Pseudomonas_putida_F1	chromosome	Gammaproteobacteria	NC_009512	158	112	0	0	0	0	0	0	0	0	0	0	158	112	18	46	21	27	25	17	12	24216	24216	5959964	608922	151676	680
Pseudomonas_putida_KT2440	chromosome	Gammaproteobacteria	NC_002947	133	127	12	12	6	0	10	9	1	0	3	2494	121	115	11	6	4	11	22	2	4	17597	20091	6181863	591424	187927	605
Pseudomonas_stutzeri_A1501	chromosome	Gammaproteobacteria	NC_009434	30	30	0	0	0	0	0	0	0	0	0	0	30	30	7	0	10	10	4	0	3	5206	5206	4567418	432840	64325	391
Pseudomonas_syringae_phaseolicola_1448A	chromosome	Gammaproteobacteria	NC_005773	53	53	9	9	5	0	9	7	2	0	4	2090	44	44	4	0	5	7	8	0	4	6642	8732	5928787	630937	153773	628
Pseudomonas_syringae_phaseolicola_1448A	plasmid_large_plasmid	Gammaproteobacteria	NC_007274	0	0	0	0	0	0	0	0	0	0	0	0	0	0	0	0	0	0	0	0	0	0	0	131950	26340	16600	9
Pseudomonas_syringae_phaseolicola_1448A	plasmid_small_plasmid	Gammaproteobacteria	NC_007275	0	0	0	0	0	0	0	0	0	0	0	0	0	0	0	0	0	0	0	0	0	0	0	51711	6504	0	8
Pseudomonas_syringae_pv_B728a	chromosome	Gammaproteobacteria	NC_007005	59	59	13	13	4	0	12	8	2	0	6	2648	46	46	4	0	5	10	4	0	3	8258	10906	6093698	660519	70348	637
Pseudomonas_syringae_tomato_DC3000	chromosome	Gammaproteobacteria	NC_004578	55	55	9	9	3	0	9	5	0	0	5	1674	46	46	4	0	4	10	4	0	3	6645	8319	6397126	685554	114658	669
Pseudomonas_syringae_tomato_DC3000	plasmid_pDC3000B	Gammaproteobacteria	NC_004632	0	0	0	0	0	0	0	0	0	0	0	0	0	0	0	0	0	0	0	0	0	0	0	67473	7543	2646	6
Pseudomonas_syringae_tomato_DC3000	plasmid_pDC3000A	Gammaproteobacteria	NC_004633	0	0	0	0	0	0	0	0	0	0	0	0	0	0	0	0	0	0	0	0	0	0	0	73661	10202	1485	5
Psychrobacter_arcticum_273-4	chromosome	Gammaproteobacteria	NC_007204	281	162	1	1	0	0	1	0	0	0	0	175	280	161	38	119	6	6	27	7	71	44843	45018	2650701	458206	305339	616
Psychrobacter_cryohalolentis_K5	plasmid_1	Gammaproteobacteria	NC_007968	0	0	0	0	0	0	0	0	0	0	0	0	0	0	0	0	0	0	0	0	0	0	0	41221	11867	358	10
Psychrobacter_cryohalolentis_K5	chromosome	Gammaproteobacteria	NC_007969	244	211	0	0	0	0	0	0	0	0	0	0	244	211	35	33	4	5	38	4	55	34015	34015	3059876	479334	252466	735
Psychrobacter_PRwf-1	plasmid_pRWF101	Gammaproteobacteria	NC_009516	0	0	0	0	0	0	0	0	0	0	0	0	0	0	0	0	0	0	0	0	0	0	0	13956	3637	0	2
Psychrobacter_PRwf-1	plasmid_pRWF102	Gammaproteobacteria	NC_009517	0	0	0	0	0	0	0	0	0	0	0	0	0	0	0	0	0	0	0	0	0	0	0	2117	982	0	1
Psychrobacter_PRwf-1	chromosome	Gammaproteobacteria	NC_009524	2	2	0	0	0	0	0	0	0	0	0	0	2	2	0	0	1	0	0	0	1	310	310	2978976	448219	17330	763
Psychromonas_ingrahamii_37	chromosome	Gammaproteobacteria	NC_008709	10	10	0	0	0	0	0	0	0	0	0	0	10	10	0	0	1	3	1	0	1	2054	2054	4559598	715605	48266	551
Pyrobaculum_aerophilum	chromosome	Firmicutes	NC_003364	0	0	0	0	0	0	0	0	0	0	0	0	0	0	0	0	0	0	0	0	0	0	0	2222430	229003	4061	95
Ralstonia_eutropha_H16	chromosome_1	Betaproteobacteria	NC_008313	48	48	1	1	0	0	0	1	0	0	0	237	47	47	9	0	1	13	11	0	8	7595	7832	4052032	435102	53282	462
Ralstonia_eutropha_H16	chromosome_2	Betaproteobacteria	NC_008314	6	6	0	0	0	0	0	0	0	0	0	0	6	6	0	0	1	1	1	0	1	1715	1715	2912490	306163	15093	268
Ralstonia_eutropha_JMP134	plasmid_megaplasmid	Betaproteobacteria	NC_007336	0	0	0	0	0	0	0	0	0	0	0	0	0	0	0	0	0	0	0	0	0	0	0	634917	80357	6544	49
Ralstonia_eutropha_JMP134	plasmid_1	Betaproteobacteria	NC_007337	4	4	0	0	0	0	0	0	0	0	0	0	4	4	2	0	0	1	1	0	0	393	393	87688	5021	3724	8
Ralstonia_eutropha_JMP134	chromosome_1	Betaproteobacteria	NC_007347	43	43	4	4	2	0	1	1	1	0	1	886	39	39	7	0	1	7	5	2	9	6961	7847	3806533	387552	36941	479
Ralstonia_eutropha_JMP134	chromosome_2	Betaproteobacteria	NC_007348	13	13	1	1	0	0	0	0	0	0	0	152	12	12	0	0	0	4	4	2	4	2222	2374	2726152	294463	14534	226
Ralstonia_metallidurans_CH34	plasmid_plasmid_1	Betaproteobacteria	NC_007971	0	0	0	0	0	0	0	0	0	0	0	0	0	0	0	0	0	0	0	0	0	0	0	233720	42203	1233	34
Ralstonia_metallidurans_CH34	plasmid_plasmid_2	Betaproteobacteria	NC_007972	2	2	0	0	0	0	0	0	0	0	0	0	2	2	0	0	0	0	0	0	0	162	162	171459	19895	1037	22
Ralstonia_metallidurans_CH34	chromosome_1	Betaproteobacteria	NC_007973	71	71	1	1	0	0	0	0	0	0	0	232	70	70	11	0	2	10	15	2	13	11519	11751	3928089	383173	65633	504
Ralstonia_metallidurans_CH34	chromosome_2	Betaproteobacteria	NC_007974	9	9	0	0	0	0	0	0	0	0	0	0	9	9	0	0	0	0	5	0	2	1843	1843	2580084	271357	19979	267
Ralstonia_solanacearum	chromosome	Betaproteobacteria	NC_003295	23	23	2	2	2	0	0	0	1	0	0	433	21	21	1	0	0	0	3	1	5	3617	4050	3716413	395040	34515	498
Ralstonia_solanacearum	plasmid_pGMI1000MP	Betaproteobacteria	NC_003296	1	1	0	0	0	0	0	0	0	0	0	0	1	1	0	0	0	0	1	0	0	128	128	2094509	242601	29253	193
Rhizobium_etli_CFN_42	plasmid_symbiotic_plasmid_p42d	Alphaproteobacteria	NC_004041	7	7	0	0	0	0	0	0	0	0	0	0	7	7	1	0	2	0	2	0	1	1422	1422	371254	64164	11749	30
Rhizobium_etli_CFN_42	chromosome	Alphaproteobacteria	NC_007761	161	161	0	0	0	0	0	0	0	0	0	0	161	161	12	0	10	15	31	2	12	31265	31265	4381608	548779	215044	474
Rhizobium_etli_CFN_42	plasmid_p42a	Alphaproteobacteria	NC_007762	0	0	0	0	0	0	0	0	0	0	0	0	0	0	0	0	0	0	0	0	0	0	0	194229	30271	9743	17
Rhizobium_etli_CFN_42	plasmid_p42b	Alphaproteobacteria	NC_007763	5	5	0	0	0	0	0	0	0	0	0	0	5	5	0	0	0	0	1	0	1	566	566	184338	14613	8925	17
Rhizobium_etli_CFN_42	plasmid_p42c	Alphaproteobacteria	NC_007764	3	3	0	0	0	0	0	0	0	0	0	0	3	3	0	0	0	0	0	0	0	760	760	250948	24038	3880	13
Rhizobium_etli_CFN_42	plasmid_p42e	Alphaproteobacteria	NC_007765	7	7	0	0	0	0	0	0	0	0	0	0	7	7	1	0	1	0	0	0	0	1528	1528	505334	50139	14706	31
Rhizobium_etli_CFN_42	plasmid_p42f	Alphaproteobacteria	NC_007766	6	6	0	0	0	0	0	0	0	0	0	0	6	6	1	0	0	0	1	0	1	851	851	642517	73015	11436	43
Rhizobium_leguminosarum_bv_viciae_3841	chromosome_2	Alphaproteobacteria	NC_008378	12	12	0	0	0	0	0	0	0	0	0	0	12	12	1	0	0	0	3	2	1	1391	1391	870021	69717	13959	54
Rhizobium_leguminosarum_bv_viciae_3841	plasmid_pRL9	Alphaproteobacteria	NC_008379	4	4	0	0	0	0	0	0	0	0	0	0	4	4	0	0	0	0	0	0	0	597	597	352782	33893	7396	21
Rhizobium_leguminosarum_bv_viciae_3841	chromosome	Alphaproteobacteria	NC_008380	165	165	0	0	0	0	0	0	0	0	0	0	165	165	12	0	11	15	37	1	11	30805	30805	5057142	629057	217559	546
Rhizobium_leguminosarum_bv_viciae_3841	plasmid_pRL10	Alphaproteobacteria	NC_008381	5	5	0	0	0	0	0	0	0	0	0	0	5	5	1	0	0	0	2	0	0	1300	1300	488135	56843	23897	28
Rhizobium_leguminosarum_bv_viciae_3841	plasmid_pRL7	Alphaproteobacteria	NC_008382	5	5	0	0	0	0	0	0	0	0	0	0	5	5	0	0	0	0	1	0	0	735	735	151564	27480	14098	14
Rhizobium_leguminosarum_bv_viciae_3841	plasmid_pRL8	Alphaproteobacteria	NC_008383	0	0	0	0	0	0	0	0	0	0	0	0	0	0	0	0	0	0	0	0	0	0	0	147463	17200	3760	11
Rhizobium_leguminosarum_bv_viciae_3841	plasmid_pRL11	Alphaproteobacteria	NC_008384	4	4	0	0	0	0	0	0	0	0	0	0	4	4	0	0	1	0	0	0	0	995	995	684202	74624	12731	42
Rhodobacter_sphaeroides_2_4_1	plasmid_B	Alphaproteobacteria	NC_007488	0	0	0	0	0	0	0	0	0	0	0	0	0	0	0	0	0	0	0	0	0	0	0	114178	8542	3958	6
Rhodobacter_sphaeroides_2_4_1	plasmid_C	Alphaproteobacteria	NC_007489	0	0	0	0	0	0	0	0	0	0	0	0	0	0	0	0	0	0	0	0	0	0	0	105284	15764	4517	9
Rhodobacter_sphaeroides_2_4_1	plasmid_D	Alphaproteobacteria	NC_007490	0	0	0	0	0	0	0	0	0	0	0	0	0	0	0	0	0	0	0	0	0	0	0	100828	15000	5541	9
Rhodobacter_sphaeroides_2_4_1	chromosome_1	Alphaproteobacteria	NC_007493	5	5	0	0	0	0	0	0	0	0	0	0	5	5	0	0	0	0	1	0	0	1181	1181	3188609	321777	18645	221
Rhodobacter_sphaeroides_2_4_1	chromosome_2	Alphaproteobacteria	NC_007494	2	2	0	0	0	0	0	0	0	0	0	0	2	2	0	0	0	0	0	0	0	402	402	943016	100418	12550	58
Rhodobacter_sphaeroides_2_4_1	plasmid_A	Alphaproteobacteria	NC_009007	0	0	0	0	0	0	0	0	0	0	0	0	0	0	0	0	0	0	0	0	0	0	0	114045	12485	3820	6
Rhodobacter_sphaeroides_2_4_1	plasmid_E	Alphaproteobacteria	NC_009008	0	0	0	0	0	0	0	0	0	0	0	0	0	0	0	0	0	0	0	0	0	0	0	37100	4514	1317	3
Rhodobacter_sphaeroides_ATCC_17025	chromosome	Alphaproteobacteria	NC_009428	3	3	0	0	0	0	0	0	0	0	0	0	3	3	0	0	1	0	1	0	0	655	655	3217726	285428	31340	211
Rhodobacter_sphaeroides_ATCC_17025	plasmid_pRSPA01	Alphaproteobacteria	NC_009429	3	3	0	0	0	0	0	0	0	0	0	0	3	3	0	0	1	0	0	0	0	493	493	877879	89044	32773	41
Rhodobacter_sphaeroides_ATCC_17025	plasmid_pRSPA02	Alphaproteobacteria	NC_009430	0	0	0	0	0	0	0	0	0	0	0	0	0	0	0	0	0	0	0	0	0	0	0	289489	41709	1893	22
Rhodobacter_sphaeroides_ATCC_17025	plasmid_pRSPA03	Alphaproteobacteria	NC_009431	0	0	0	0	0	0	0	0	0	0	0	0	0	0	0	0	0	0	0	0	0	0	0	121962	15291	1845	6
Rhodobacter_sphaeroides_ATCC_17025	plasmid_pRSPA04	Alphaproteobacteria	NC_009432	0	0	0	0	0	0	0	0	0	0	0	0	0	0	0	0	0	0	0	0	0	0	0	36198	5909	2064	9
Rhodobacter_sphaeroides_ATCC_17025	plasmid_pRSPA05	Alphaproteobacteria	NC_009433	0	0	0	0	0	0	0	0	0	0	0	0	0	0	0	0	0	0	0	0	0	0	0	13873	2092	0	0
Rhodobacter_sphaeroides_ATCC_17029	plasmid_pRSPH01	Alphaproteobacteria	NC_009040	0	0	0	0	0	0	0	0	0	0	0	0	0	0	0	0	0	0	0	0	0	0	0	122606	14145	1394	6
Rhodobacter_sphaeroides_ATCC_17029	chromosome_1	Alphaproteobacteria	NC_009049	2	2	0	0	0	0	0	0	0	0	0	0	2	2	0	0	0	0	1	0	0	554	554	3147721	313673	9245	204
Rhodobacter_sphaeroides_ATCC_17029	chromosome_2	Alphaproteobacteria	NC_009050	2	2	0	0	0	0	0	0	0	0	0	0	2	2	0	0	0	0	0	0	0	180	180	1219053	119605	18129	71
Rhodococcus_RHA1	chromosome	Actinobacteria	NC_008268	7	7	0	0	0	0	0	0	0	0	0	0	7	7	0	0	0	0	3	0	0	1498	1498	7804765	637714	32354	256
Rhodococcus_RHA1	plasmid_pRHL1	Actinobacteria	NC_008269	1	1	0	0	0	0	0	0	0	0	0	0	1	1	0	0	0	0	0	0	0	187	187	1123075	178635	8194	52
Rhodococcus_RHA1	plasmid_pRHL2	Actinobacteria	NC_008270	0	0	0	0	0	0	0	0	0	0	0	0	0	0	0	0	0	0	0	0	0	0	0	442536	67812	1747	21
Rhodococcus_RHA1	plasmid_pRHL3	Actinobacteria	NC_008271	0	0	0	0	0	0	0	0	0	0	0	0	0	0	0	0	0	0	0	0	0	0	0	332361	47609	2445	22
Rhodoferax_ferrireducens_T118	plasmid_plasmid1	Betaproteobacteria	NC_007901	0	0	0	0	0	0	0	0	0	0	0	0	0	0	0	0	0	0	0	0	0	0	0	257447	35969	347	64
Rhodoferax_ferrireducens_T118	chromosome	Betaproteobacteria	NC_007908	5	5	0	0	0	0	0	0	0	0	0	0	5	5	1	0	2	0	2	0	0	1316	1316	4712337	417132	22662	337
Rhodopseudomonas_palustris_BisA53	chromosome	Alphaproteobacteria	NC_008435	32	26	0	0	0	0	0	0	0	0	0	0	32	26	3	6	3	4	2	0	1	5593	5593	5505494	675393	56875	629
Rhodopseudomonas_palustris_BisB5	chromosome	Alphaproteobacteria	NC_007958	36	36	0	0	0	0	0	0	0	0	0	0	36	36	2	0	2	4	6	0	6	7032	7032	4892717	591855	42282	499
Rhodopseudomonas_palustris_BisB18	chromosome	Alphaproteobacteria	NC_007925	36	25	0	0	0	0	0	0	0	0	0	0	36	25	2	11	2	4	3	1	6	7172	7172	5513844	710115	66932	628
Rhodopseudomonas_palustris_CGA009	chromosome	Alphaproteobacteria	NC_005296	34	34	3	3	0	0	0	0	1	2	1	445	31	31	2	0	0	4	5	0	3	5268	5713	5459213	648681	47090	541
Rhodopseudomonas_palustris_CGA009	plasmid_pRPA	Alphaproteobacteria	NC_005297	0	0	0	0	0	0	0	0	0	0	0	0	0	0	0	0	0	0	0	0	0	0	0	8427	1909	0	3
Rhodopseudomonas_palustris_HaA2	chromosome	Alphaproteobacteria	NC_007778	23	23	0	0	0	0	0	0	0	0	0	0	23	23	2	0	1	6	3	1	5	3690	3690	5331656	632786	32068	502
Rhodospirillum_rubrum_ATCC_11170	plasmid_unnamed	Alphaproteobacteria	NC_007641	0	0	0	0	0	0	0	0	0	0	0	0	0	0	0	0	0	0	0	0	0	0	0	53732	7092	660	4
Rhodospirillum_rubrum_ATCC_11170	chromosome	Alphaproteobacteria	NC_007643	4	4	0	0	0	0	0	0	0	0	0	0	4	4	0	0	0	0	1	0	1	1165	1165	4352825	439565	22683	619
Rickettsia_bellii_RML369-C	chromosome	Alphaproteobacteria	NC_007940	35	1	0	0	0	0	0	0	0	0	0	0	35	1	0	34	0	1	1	4	13	4987	4987	1522076	211549	47757	107
Rickettsia_conorii	chromosome	Alphaproteobacteria	NC_003103	28	8	0	0	0	0	0	0	0	0	0	0	28	8	0	20	0	0	3	5	6	5052	5052	1268755	226184	61346	84
Rickettsia_felis_URRWXCal2	chromosome	Alphaproteobacteria	NC_007109	68	5	0	0	0	0	0	0	0	0	0	0	68	5	0	63	0	0	3	4	16	10622	10622	1485148	220508	88242	104
Rickettsia_felis_URRWXCal2	plasmid_pRF	Alphaproteobacteria	NC_007110	0	0	0	0	0	0	0	0	0	0	0	0	0	0	0	0	0	0	0	0	0	0	0	62829	12102	1143	1
Rickettsia_felis_URRWXCal2	plasmid_pRFdelta	Alphaproteobacteria	NC_007111	0	0	0	0	0	0	0	0	0	0	0	0	0	0	0	0	0	0	0	0	0	0	0	39263	7457	305	0
Rickettsia_prowazekii	chromosome	Alphaproteobacteria	NC_000963	1	1	0	0	0	0	0	0	0	0	0	0	1	1	0	0	0	0	1	0	0	105	105	1111523	137988	46121	13
Rickettsia_typhi_wilmington	chromosome	Alphaproteobacteria	NC_006142	1	1	0	0	0	0	0	0	0	0	0	0	1	1	0	0	0	0	0	0	0	99	99	1111496	148178	32495	11
Roseiflexus_RS-1	chromosome	Chloroflexi	NC_009523	6	6	0	0	0	0	0	0	0	0	0	0	6	6	0	0	0	0	0	0	0	1539	1539	5801598	650437	60977	413
Roseobacter_denitrificans_OCh_114	chromosome	Alphaproteobacteria	NC_008209	7	7	0	0	0	0	0	0	0	0	0	0	7	7	1	0	1	1	2	1	0	1121	1121	4133097	364619	25860	333
Roseobacter_denitrificans_OCh_114	plasmid_pTB1	Alphaproteobacteria	NC_008386	0	0	0	0	0	0	0	0	0	0	0	0	0	0	0	0	0	0	0	0	0	0	0	106469	13357	367	7
Roseobacter_denitrificans_OCh_114	plasmid_pTB2	Alphaproteobacteria	NC_008387	0	0	0	0	0	0	0	0	0	0	0	0	0	0	0	0	0	0	0	0	0	0	0	69269	8841	0	2
Roseobacter_denitrificans_OCh_114	plasmid_pTB3	Alphaproteobacteria	NC_008388	0	0	0	0	0	0	0	0	0	0	0	0	0	0	0	0	0	0	0	0	0	0	0	16575	2123	0	0
Roseobacter_denitrificans_OCh_114	plasmid_pTB4	Alphaproteobacteria	NC_008389	0	0	0	0	0	0	0	0	0	0	0	0	0	0	0	0	0	0	0	0	0	0	0	5824	2680	0	0
Rubrobacter_xylanophilus_DSM_9941	chromosome	Actinobacteria	NC_008148	4	4	0	0	0	0	0	0	0	0	0	0	4	4	0	0	4	1	1	0	1	1212	1212	3225748	201528	28144	134
Saccharophagus_degradans_2-40	chromosome	Gammaproteobacteria	NC_007912	2	2	0	0	0	0	0	0	0	0	0	0	2	2	0	0	2	2	0	1	1	389	389	5057531	598714	10565	602
Saccharopolyspora_erythraea_NRRL_2338	chromosome	Actinobacteria	NC_009142	2	2	0	0	0	0	0	0	0	0	0	0	2	2	0	0	0	0	0	0	0	307	307	8212805	1082950	63322	494
Salinibacter_ruber_DSM_13855	chromosome	Bacteroidetes/Chlorobi	NC_007677	3	3	0	0	0	0	0	0	0	0	0	0	3	3	1	0	2	0	0	0	0	574	574	3551823	419071	4593	290
Salinibacter_ruber_DSM_13855	plasmid_pSR35	Bacteroidetes/Chlorobi	NC_007678	0	0	0	0	0	0	0	0	0	0	0	0	0	0	0	0	0	0	0	0	0	0	0	35505	5290	0	7
Salinispora_tropica_CNB-440	chromosome	Actinobacteria	NC_009380	2	2	0	0	0	0	0	0	0	0	0	0	2	2	0	0	1	1	1	0	0	393	393	5183331	542247	16230	193
Salmonella_enterica_Choleraesuis	plasmid_pSCV50	Gammaproteobacteria	NC_006855	2	2	0	0	0	0	0	0	0	0	0	0	2	2	0	0	0	0	0	0	0	349	349	49558	9045	8774	4
Salmonella_enterica_Choleraesuis	plasmid_pSC138	Gammaproteobacteria	NC_006856	6	6	0	0	0	0	0	0	0	0	0	0	6	6	0	0	0	0	0	0	0	604	604	138742	17727	8011	23
Salmonella_enterica_Choleraesuis	chromosome	Gammaproteobacteria	NC_006905	368	341	26	26	6	0	21	20	6	1	8	4258	342	315	60	27	38	27	59	8	44	48402	52660	4755700	522666	554080	552
Salmonella_enterica_Paratypi_ATCC_9150	chromosome	Gammaproteobacteria	NC_006511	369	311	25	25	8	0	21	19	4	1	5	4184	344	286	66	58	56	25	69	8	36	46970	51154	4585229	498829	595657	513
Salmonella_typhi	chromosome	Gammaproteobacteria	NC_003198	425	303	27	25	10	2	24	22	6	2	10	4038	398	278	59	120	49	32	68	14	38	51947	55985	4809037	530548	607594	579
Salmonella_typhi	plasmid_pHCM1	Gammaproteobacteria	NC_003384	0	0	0	0	0	0	0	0	0	0	0	0	0	0	0	0	0	0	0	0	0	0	0	218160	33480	8797	24
Salmonella_typhi	plasmid_pHCM2	Gammaproteobacteria	NC_003385	5	5	0	0	0	0	0	0	0	0	0	0	5	5	2	0	0	0	1	0	0	977	977	106516	12881	4155	15
Salmonella_typhi_Ty2	chromosome	Gammaproteobacteria	NC_004631	453	333	28	26	9	2	25	24	4	2	11	4381	425	307	61	118	50	28	83	11	41	55901	60282	4791961	542543	623081	606
Salmonella_typhimurium_LT2	chromosome	Gammaproteobacteria	NC_003197	410	355	54	52	11	2	27	26	7	1	17	9667	356	303	66	53	53	26	59	8	32	48014	57681	4857432	545281	494782	578
Salmonella_typhimurium_LT2	plasmid_pSLT	Gammaproteobacteria	NC_003277	5	5	0	0	0	0	0	0	0	0	0	0	5	5	0	0	0	0	1	0	0	490	490	93939	14734	12454	15
Shewanella_amazonensis_SB2B	chromosome	Gammaproteobacteria	NC_008700	63	49	0	0	0	0	0	0	0	0	0	0	63	49	12	14	8	12	7	0	12	10914	10914	4306142	441097	43619	867
Shewanella_ANA-3	plasmid_1	Gammaproteobacteria	NC_008573	1	1	0	0	0	0	0	0	0	0	0	0	1	1	0	0	0	0	0	0	0	128	128	278942	38160	7985	21
Shewanella_ANA-3	chromosome_1	Gammaproteobacteria	NC_008577	526	495	0	0	0	0	0	0	0	0	0	0	526	495	116	31	17	25	84	4	55	73947	73947	4972204	598968	456621	907
Shewanella_baltica_OS155	plasmid_pSbal01	Gammaproteobacteria	NC_009035	4	4	0	0	0	0	0	0	0	0	0	0	4	4	0	0	0	0	1	0	0	541	541	116763	14362	6115	27
Shewanella_baltica_OS155	plasmid_pSbal02	Gammaproteobacteria	NC_009036	1	1	0	0	0	0	0	0	0	0	0	0	1	1	1	0	0	0	0	0	0	188	188	74000	12799	3468	4
Shewanella_baltica_OS155	plasmid_pSbal03	Gammaproteobacteria	NC_009037	1	1	0	0	0	0	0	0	0	0	0	0	1	1	0	0	0	0	0	0	1	162	162	16762	1396	1080	4
Shewanella_baltica_OS155	plasmid_pSbal04	Gammaproteobacteria	NC_009038	0	0	0	0	0	0	0	0	0	0	0	0	0	0	0	0	0	0	0	0	0	0	0	7995	2149	0	3
Shewanella_baltica_OS155	chromosome	Gammaproteobacteria	NC_009052	250	216	0	0	0	0	0	0	0	0	0	0	250	216	30	34	11	13	35	0	34	35898	35898	5127376	703237	324257	1089
Shewanella_baltica_OS185	plasmid_pS18501	Gammaproteobacteria	NC_009661	2	2	0	0	0	0	0	0	0	0	0	0	2	2	0	0	0	0	0	0	0	154	154	83224	14263	4002	12
Shewanella_baltica_OS185	chromosome	Gammaproteobacteria	NC_009665	244	225	0	0	0	0	0	0	0	0	0	0	244	225	31	19	11	13	33	5	36	33587	33587	5229686	692532	330242	1083
Shewanella_denitrificans_OS217	chromosome	Gammaproteobacteria	NC_007954	68	68	0	0	0	0	0	0	0	0	0	0	68	68	20	0	6	7	10	0	18	10949	10949	4545906	588655	103192	747
Shewanella_frigidimarina_NCIMB_400	chromosome	Gammaproteobacteria	NC_008345	67	49	0	0	0	0	0	0	0	0	0	0	67	49	14	18	7	10	6	1	17	11522	11522	4845257	655191	86996	896
Shewanella_loihica_PV-4	chromosome	Gammaproteobacteria	NC_009092	53	53	0	0	0	0	0	0	0	0	0	0	53	53	11	0	4	8	8	2	13	9474	9474	4602594	561157	67671	887
Shewanella_MR-4	chromosome	Gammaproteobacteria	NC_008321	622	593	0	0	0	0	0	0	0	0	0	0	622	593	160	29	15	29	102	3	57	84450	84450	4706287	584521	508800	884
Shewanella_MR-7	plasmid_Plasmid1	Gammaproteobacteria	NC_008320	0	0	0	0	0	0	0	0	0	0	0	0	0	0	0	0	0	0	0	0	0	0	0	6499	2822	0	4
Shewanella_MR-7	chromosome	Gammaproteobacteria	NC_008322	627	605	0	0	0	0	0	0	0	0	0	0	627	605	157	22	16	26	107	6	61	84109	84109	4792610	597487	510374	911
Shewanella_oneidensis	chromosome	Gammaproteobacteria	NC_004347	301	250	3	3	0	0	1	1	0	0	1	429	298	247	51	51	4	15	42	5	47	48396	48825	4969803	668726	424885	834
Shewanella_oneidensis	plasmid_pMR-1	Gammaproteobacteria	NC_004349	3	3	0	0	0	0	0	0	0	0	0	0	3	3	0	0	0	0	1	0	0	290	290	161613	26185	18154	9
Shewanella_putrefaciens_CN-32	chromosome	Gammaproteobacteria	NC_009438	526	513	0	0	0	0	0	0	0	0	0	0	526	513	130	13	11	19	101	2	81	73305	73305	4659220	582673	510438	738
Shewanella_W3-18-1	chromosome	Gammaproteobacteria	NC_008750	507	502	0	0	0	0	0	0	0	0	0	0	507	502	123	5	9	19	80	2	84	69302	69302	4708380	587195	511396	712
Shigella_boydii_Sb227	plasmid_pSB4_227	Gammaproteobacteria	NC_007608	11	11	0	0	0	0	0	0	0	0	0	0	11	11	0	0	0	0	2	0	2	1567	1567	126697	30625	29466	20
Shigella_boydii_Sb227	chromosome	Gammaproteobacteria	NC_007613	381	309	0	0	0	0	0	0	0	0	0	0	381	309	71	72	99	45	70	11	58	54356	54356	4519823	563993	689528	551
Shigella_dysenteriae	chromosome	Gammaproteobacteria	NC_007606	376	310	0	0	0	0	0	0	0	0	0	0	376	310	69	66	102	49	65	12	52	54126	54126	4369232	615423	772531	514
Shigella_dysenteriae	plasmid_pSD1_197	Gammaproteobacteria	NC_007607	20	20	0	0	0	0	0	0	0	0	0	0	20	20	2	0	0	0	4	0	4	3336	3336	182726	38783	38532	26
Shigella_dysenteriae	plasmid_pSD197_spA	Gammaproteobacteria	NC_009344	0	0	0	0	0	0	0	0	0	0	0	0	0	0	0	0	0	0	0	0	0	0	0	8953	2251	495	2
Shigella_flexneri_2a	chromosome	Gammaproteobacteria	NC_004337	370	309	27	27	8	0	26	26	6	1	8	4842	343	282	52	61	70	22	60	8	46	49637	54479	4607203	567930	676515	537
Shigella_flexneri_2a	plasmid_pCP301	Gammaproteobacteria	NC_004851	16	16	0	0	0	0	0	0	0	0	0	0	16	16	2	0	0	0	2	0	1	2295	2295	221618	42191	43968	27
Shigella_flexneri_2a_2457T	chromosome	Gammaproteobacteria	NC_004741	390	325	29	29	8	0	28	26	6	1	7	4897	361	296	61	65	72	23	78	12	46	53035	57932	4599354	567223	770769	558
Shigella_flexneri_5_8401	chromosome	Gammaproteobacteria	NC_008258	388	315	0	0	0	0	0	0	0	0	0	0	388	315	70	73	95	45	78	15	52	57232	57232	4574284	549947	636129	541
Shigella_sonnei_Ss046	chromosome	Gammaproteobacteria	NC_007384	405	332	0	0	0	0	0	0	0	0	0	0	405	332	74	73	110	55	71	16	67	60473	60473	4825265	584807	732061	579
Shigella_sonnei_Ss046	plasmid_pSS_046	Gammaproteobacteria	NC_007385	17	17	0	0	0	0	0	0	0	0	0	0	17	17	1	0	0	0	2	0	2	2352	2352	214396	41835	40164	22
Shigella_sonnei_Ss046	plasmid_pSS046_spA	Gammaproteobacteria	NC_009345	0	0	0	0	0	0	0	0	0	0	0	0	0	0	0	0	0	0	0	0	0	0	0	8401	666	1858	1
Shigella_sonnei_Ss046	plasmid_pSS046_spB	Gammaproteobacteria	NC_009346	1	1	0	0	0	0	0	0	0	0	0	0	1	1	0	0	0	0	0	0	1	147	147	5153	1373	1151	1
Shigella_sonnei_Ss046	plasmid_pSS046_spC	Gammaproteobacteria	NC_009347	0	0	0	0	0	0	0	0	0	0	0	0	0	0	0	0	0	0	0	0	0	0	0	2101	1134	0	0
Silicibacter_pomeroyi_DSS-3	chromosome	Alphaproteobacteria	NC_003911	11	11	0	0	0	0	0	0	0	0	0	0	11	11	0	0	1	1	2	0	0	1904	1904	4109442	340819	30744	367
Silicibacter_pomeroyi_DSS-3	plasmid_megaplasmid	Alphaproteobacteria	NC_006569	0	0	0	0	0	0	0	0	0	0	0	0	0	0	0	0	0	0	0	0	0	0	0	491611	38466	823	23
Silicibacter_TM1040	plasmid_unnamed	Alphaproteobacteria	NC_008042	0	0	0	0	0	0	0	0	0	0	0	0	0	0	0	0	0	0	0	0	0	0	0	130973	16805	1176	10
Silicibacter_TM1040	plasmid_mega_plasmid	Alphaproteobacteria	NC_008043	1	1	0	0	0	0	0	0	0	0	0	0	1	1	0	0	1	1	1	0	0	160	160	821788	81650	3721	82
Silicibacter_TM1040	chromosome	Alphaproteobacteria	NC_008044	7	7	0	0	0	0	0	0	0	0	0	0	7	7	2	0	1	1	0	0	1	1056	1056	3200938	343377	4653	521
Sinorhizobium_medicae_WSM419	plasmid_pSMED01	Alphaproteobacteria	NC_009620	17	17	0	0	0	0	0	0	0	0	0	0	17	17	1	0	1	0	3	0	1	3519	3519	1570951	157648	48959	103
Sinorhizobium_medicae_WSM419	plasmid_pSMED02	Alphaproteobacteria	NC_009621	16	16	0	0	0	0	0	0	0	0	0	0	16	16	1	0	1	0	2	0	1	2864	2864	1245408	154903	78285	79
Sinorhizobium_medicae_WSM419	plasmid_pSMED03	Alphaproteobacteria	NC_009622	4	4	0	0	0	0	0	0	0	0	0	0	4	4	0	0	0	0	0	0	0	755	755	219313	23631	12319	20
Sinorhizobium_medicae_WSM419	chromosome	Alphaproteobacteria	NC_009636	148	148	0	0	0	0	0	0	0	0	0	0	148	148	16	0	11	10	35	2	4	23929	23929	3781904	445056	198825	389
Sinorhizobium_meliloti	plasmid_pSymA	Alphaproteobacteria	NC_003037	14	14	0	0	0	0	0	0	0	0	0	0	14	14	1	0	1	1	3	0	0	2775	2775	1354226	206630	46933	88
Sinorhizobium_meliloti	chromosome	Alphaproteobacteria	NC_003047	188	156	13	13	0	0	3	0	4	0	2	2009	175	143	19	32	3	3	27	5	4	29477	31486	3654135	470125	221613	452
Sinorhizobium_meliloti	plasmid_pSymB	Alphaproteobacteria	NC_003078	30	30	1	1	0	0	1	0	0	0	0	179	29	29	0	0	0	1	7	0	2	5304	5483	1683333	171342	44494	130
Sodalis_glossinidius_morsitans	chromosome	Gammaproteobacteria	NC_007712	24	24	0	0	0	0	0	0	0	0	0	0	24	24	7	0	4	4	3	0	5	4781	4781	4171146	380481	448656	296
Sodalis_glossinidius_morsitans	plasmid_pSG1	Gammaproteobacteria	NC_007713	1	1	0	0	0	0	0	0	0	0	0	0	1	1	0	0	0	0	0	0	0	198	198	83306	7400	6184	4
Sodalis_glossinidius_morsitans	plasmid_pSG2	Gammaproteobacteria	NC_007714	0	0	0	0	0	0	0	0	0	0	0	0	0	0	0	0	0	0	0	0	0	0	0	27240	2391	3619	3
Sodalis_glossinidius_morsitans	plasmid_pSG3	Gammaproteobacteria	NC_007715	0	0	0	0	0	0	0	0	0	0	0	0	0	0	0	0	0	0	0	0	0	0	0	10810	788	0	0
Solibacter_usitatus_Ellin6076	chromosome	Acidobacteria	NC_008536	3	3	0	0	0	0	0	0	0	0	0	0	3	3	0	0	1	0	0	0	0	178	178	9965640	791397	30715	463
Sphingomonas_wittichii_RW1	plasmid_pSWIT01	Alphaproteobacteria	NC_009507	0	0	0	0	0	0	0	0	0	0	0	0	0	0	0	0	0	0	0	0	0	0	0	310228	38839	2400	25
Sphingomonas_wittichii_RW1	plasmid_pSWIT02	Alphaproteobacteria	NC_009508	0	0	0	0	0	0	0	0	0	0	0	0	0	0	0	0	0	0	0	0	0	0	0	222757	29173	4969	16
Sphingomonas_wittichii_RW1	chromosome	Alphaproteobacteria	NC_009511	8	8	0	0	0	0	0	0	0	0	0	0	8	8	0	0	1	1	0	0	0	998	998	5382261	416717	15603	355
Sphingopyxis_alaskensis_RB2256	plasmid_F_plasmid	Alphaproteobacteria	NC_008036	0	0	0	0	0	0	0	0	0	0	0	0	0	0	0	0	0	0	0	0	0	0	0	28543	3473	303	1
Sphingopyxis_alaskensis_RB2256	chromosome	Alphaproteobacteria	NC_008048	4	4	0	0	0	0	0	0	0	0	0	0	4	4	0	0	0	0	3	0	0	386	386	3345170	297359	22281	324
Staphylococcus_aureus_aureus_MRSA252	chromosome	Firmicutes	NC_002952	66	37	15	15	2	0	13	13	8	3	9	4050	51	22	3	29	2	4	2	0	10	6994	11044	2902619	410408	80670	414
Staphylococcus_aureus_aureus_MSSA476	chromosome	Firmicutes	NC_002953	58	39	16	16	2	0	14	14	9	3	9	4216	42	23	2	19	9	5	2	0	14	7239	11455	2799802	397718	73137	418
Staphylococcus_aureus_aureus_MSSA476	plasmid_pSAS	Firmicutes	NC_005951	3	3	0	0	0	0	0	0	0	0	0	0	3	3	0	0	1	0	0	0	1	299	299	20652	2248	4695	7
Staphylococcus_aureus_COL	chromosome	Firmicutes	NC_002951	71	45	17	17	3	0	15	16	10	5	10	4544	54	28	6	26	12	3	1	0	12	8413	12957	2809422	407713	62995	434
Staphylococcus_aureus_COL	plasmid_pT181	Firmicutes	NC_006629	1	1	0	0	0	0	0	0	0	0	0	0	1	1	0	0	0	0	0	0	0	55	55	4440	870	681	1
Staphylococcus_aureus_JH1	plasmid_pSJH101	Firmicutes	NC_009619	3	3	0	0	0	0	0	0	0	0	0	0	3	3	0	0	0	0	0	0	1	304	304	30429	4507	2839	6
Staphylococcus_aureus_JH1	chromosome	Firmicutes	NC_009632	65	44	0	0	0	0	0	0	0	0	0	0	65	44	4	21	21	18	11	4	21	12049	12049	2906507	403944	58661	442
Staphylococcus_aureus_JH9	plasmid_pSJH901	Firmicutes	NC_009477	4	4	0	0	0	0	0	0	0	0	0	0	4	4	1	0	2	0	0	0	2	407	407	30429	4321	3431	8
Staphylococcus_aureus_JH9	chromosome	Firmicutes	NC_009487	65	43	0	0	0	0	0	0	0	0	0	0	65	43	5	22	21	18	11	4	24	12224	12224	2906700	412201	53344	450
Staphylococcus_aureus_Mu50	chromosome	Firmicutes	NC_002758	63	50	15	15	3	0	13	13	9	4	9	3940	48	35	3	13	7	6	2	2	15	9243	13183	2878529	422620	49854	453
Staphylococcus_aureus_Mu50	plasmid_VRSAp	Firmicutes	NC_002774	3	3	0	0	0	0	0	0	0	0	0	0	3	3	0	0	1	0	0	0	1	429	429	25107	5252	1625	9
Staphylococcus_aureus_MW2	chromosome	Firmicutes	NC_003923	59	40	15	15	3	0	13	13	9	3	9	4054	44	25	4	19	7	5	2	0	12	7452	11506	2820462	414628	46088	441
Staphylococcus_aureus_N315	chromosome	Firmicutes	NC_002745	61	47	14	14	2	0	12	11	8	2	8	3596	47	33	2	14	5	5	1	2	11	8755	12351	2814816	416485	54683	440
Staphylococcus_aureus_N315	plasmid_pN315	Firmicutes	NC_003140	5	5	0	0	0	0	0	0	0	0	0	0	5	5	2	0	2	0	0	0	3	581	581	24653	4420	3078	10
Staphylococcus_aureus_NCTC_8325	chromosome	Firmicutes	NC_007795	52	32	0	0	0	0	0	0	0	0	0	0	52	32	6	20	19	16	9	2	18	9613	9613	2821361	394430	36920	409
Staphylococcus_aureus_Newman	chromosome	Firmicutes	NC_009641	61	39	0	0	0	0	0	0	0	0	0	0	61	39	6	22	23	18	14	4	25	11675	11675	2878897	428002	46068	451
Staphylococcus_aureus_RF122	chromosome	Firmicutes	NC_007622	32	32	0	0	0	0	0	0	0	0	0	0	32	32	3	0	14	15	8	2	16	6676	6676	2742531	393112	74910	392
Staphylococcus_aureus_USA300	plasmid_pUSA01	Firmicutes	NC_007790	0	0	0	0	0	0	0	0	0	0	0	0	0	0	0	0	0	0	0	0	0	0	0	3125	1029	800	0
Staphylococcus_aureus_USA300	plasmid_pUSA02	Firmicutes	NC_007791	0	0	0	0	0	0	0	0	0	0	0	0	0	0	0	0	0	0	0	0	0	0	0	4439	869	711	0
Staphylococcus_aureus_USA300	plasmid_pUSA03	Firmicutes	NC_007792	0	0	0	0	0	0	0	0	0	0	0	0	0	0	0	0	0	0	0	0	0	0	0	37136	4593	570	4
Staphylococcus_aureus_USA300	chromosome	Firmicutes	NC_007793	79	51	0	0	0	0	0	0	0	0	0	0	79	51	8	28	25	19	10	3	27	13505	13505	2872769	431995	75188	447
Staphylococcus_epidermidis_ATCC_12228	chromosome	Firmicutes	NC_004461	116	54	17	17	4	0	15	15	9	4	12	4299	99	37	4	62	11	5	7	3	27	12234	16533	2499279	376301	74354	543
Staphylococcus_epidermidis_ATCC_12228	plasmid_pSE-12228-06	Firmicutes	NC_005003	2	2	0	0	0	0	0	0	0	0	0	0	2	2	0	0	0	0	0	0	0	446	446	6585	1687	479	4
Staphylococcus_epidermidis_ATCC_12228	plasmid_pSE-12228-05	Firmicutes	NC_005004	2	2	0	0	0	0	0	0	0	0	0	0	2	2	1	0	1	0	0	0	1	209	209	24365	3330	2364	11
Staphylococcus_epidermidis_ATCC_12228	plasmid_pSE-12228-04	Firmicutes	NC_005005	4	4	0	0	0	0	0	0	0	0	0	0	4	4	0	0	0	0	0	0	1	535	535	17261	4237	1569	7
Staphylococcus_epidermidis_ATCC_12228	plasmid_pSE-12228-03	Firmicutes	NC_005006	0	0	0	0	0	0	0	0	0	0	0	0	0	0	0	0	0	0	0	0	0	0	0	8007	1169	0	3
Staphylococcus_epidermidis_ATCC_12228	plasmid_pSE-12228-02	Firmicutes	NC_005007	0	0	0	0	0	0	0	0	0	0	0	0	0	0	0	0	0	0	0	0	0	0	0	4679	1450	726	3
Staphylococcus_epidermidis_ATCC_12228	plasmid_pSE-12228-01	Firmicutes	NC_005008	0	0	0	0	0	0	0	0	0	0	0	0	0	0	0	0	0	0	0	0	0	0	0	4439	869	711	0
Staphylococcus_epidermidis_RP62A	chromosome	Firmicutes	NC_002976	127	63	17	17	3	0	14	14	7	5	12	4244	110	46	3	64	11	4	8	3	27	15152	19396	2616530	373081	87824	525
Staphylococcus_epidermidis_RP62A	plasmid_pSERP	Firmicutes	NC_006663	1	1	0	0	0	0	0	0	0	0	0	0	1	1	0	0	0	0	0	0	0	136	136	27310	4148	1550	11
Staphylococcus_haemolyticus	chromosome	Firmicutes	NC_007168	74	59	14	14	3	0	12	12	11	6	5	3335	60	45	3	15	5	4	9	2	15	9488	12823	2685015	347520	49402	448
Staphylococcus_saprophyticus	chromosome	Firmicutes	NC_007350	38	38	18	18	3	0	15	17	10	9	9	3879	20	20	0	0	5	4	1	0	7	3574	7453	2516575	372054	27571	584
Staphylococcus_saprophyticus	plasmid_pSSP1	Firmicutes	NC_007351	1	1	0	0	0	0	0	0	0	0	0	0	1	1	0	0	0	0	1	0	0	68	68	38454	6064	1928	10
Staphylococcus_saprophyticus	plasmid_pSSP2	Firmicutes	NC_007352	1	1	0	0	0	0	0	0	0	0	0	0	1	1	0	0	0	0	0	0	1	108	108	22870	5259	2079	4
Streptococcus_agalactiae_2603	chromosome	Firmicutes	NC_004116	34	34	3	3	1	0	1	2	3	0	1	346	31	31	3	0	2	2	7	0	5	5396	5742	2160267	205164	37143	243
Streptococcus_agalactiae_A909	chromosome	Firmicutes	NC_007432	32	32	0	0	0	0	0	0	0	0	0	0	32	32	3	0	6	5	11	0	9	5767	5767	2127839	217844	39398	263
Streptococcus_agalactiae_NEM316	chromosome	Firmicutes	NC_004368	29	29	4	4	1	0	2	3	4	0	1	576	25	25	3	0	1	1	5	0	5	4257	4833	2211485	215408	32984	265
Streptococcus_mutans	chromosome	Firmicutes	NC_004350	18	18	4	4	2	0	0	2	4	0	2	707	14	14	1	0	1	3	0	0	6	1987	2694	2030921	256696	17187	261
Streptococcus_pneumoniae_D39	chromosome	Firmicutes	NC_008533	53	44	0	0	0	0	0	0	0	0	0	0	53	44	3	9	8	3	9	6	14	6851	6851	2046115	236990	62202	263
Streptococcus_pneumoniae_R6	chromosome	Firmicutes	NC_003098	28	28	4	4	0	0	4	2	3	0	3	1010	24	24	3	0	4	0	3	2	6	3357	4367	2038615	235122	22261	264
Streptococcus_pneumoniae_TIGR4	chromosome	Firmicutes	NC_003028	66	38	1	1	0	0	1	1	1	0	0	111	65	37	6	28	3	0	11	9	17	7821	7932	2160837	247772	68397	307
Streptococcus_pyogenes_M1_GAS	chromosome	Firmicutes	NC_002737	29	25	3	3	0	0	2	2	3	0	1	349	26	22	1	4	2	1	3	1	2	5329	5678	1852441	221931	41810	266
Streptococcus_pyogenes_Manfredo	chromosome	Firmicutes	NC_009332	25	25	0	0	0	0	0	0	0	0	0	0	25	25	1	0	4	3	5	2	7	5141	5141	1841271	210567	34890	264
Streptococcus_pyogenes_MGAS315	chromosome	Firmicutes	NC_004070	29	27	5	5	1	0	3	4	4	0	3	843	24	22	1	2	1	1	4	1	2	4947	5790	1900521	231574	25978	286
Streptococcus_pyogenes_MGAS2096	chromosome	Firmicutes	NC_008023	21	21	0	0	0	0	0	0	0	0	0	0	21	21	3	0	3	3	7	2	4	4109	4109	1860355	206455	17444	269
Streptococcus_pyogenes_MGAS5005	chromosome	Firmicutes	NC_007297	20	20	3	3	0	0	2	2	3	0	1	349	17	17	1	0	1	2	2	0	2	3358	3707	1838554	213935	18982	257
Streptococcus_pyogenes_MGAS6180	chromosome	Firmicutes	NC_007296	24	24	3	3	0	0	2	2	3	0	1	349	21	21	1	0	4	1	3	1	3	3899	4248	1897573	215103	22049	287
Streptococcus_pyogenes_MGAS8232	chromosome	Firmicutes	NC_003485	24	21	3	3	0	0	2	2	2	0	2	476	21	18	1	3	1	1	3	0	4	4102	4578	1895017	223382	31352	280
Streptococcus_pyogenes_MGAS9429	chromosome	Firmicutes	NC_008021	18	18	0	0	0	0	0	0	0	0	0	0	18	18	2	0	3	3	5	2	2	2930	2930	1836467	198134	15857	255
Streptococcus_pyogenes_MGAS10270	chromosome	Firmicutes	NC_008022	26	26	0	0	0	0	0	0	0	0	0	0	26	26	4	0	3	3	7	1	3	4756	4756	1928252	215351	19604	279
Streptococcus_pyogenes_MGAS10394	chromosome	Firmicutes	NC_006086	22	22	3	3	0	0	2	2	3	0	1	349	19	19	1	0	4	2	3	2	5	4029	4378	1899877	209888	18578	268
Streptococcus_pyogenes_MGAS10750	chromosome	Firmicutes	NC_008024	25	25	0	0	0	0	0	0	0	0	0	0	25	25	3	0	3	3	7	1	4	4482	4482	1937111	212951	19283	264
Streptococcus_pyogenes_SSI-1	chromosome	Firmicutes	NC_004606	24	24	4	4	1	0	3	2	2	0	2	628	20	20	0	0	1	1	1	1	2	3942	4570	1894275	234093	31297	278
Streptococcus_sanguinis_SK36	chromosome	Firmicutes	NC_009009	34	34	0	0	0	0	0	0	0	0	0	0	34	34	5	0	11	3	7	3	12	6803	6803	2388435	235539	20244	325
Streptococcus_suis_05ZYH33	chromosome	Firmicutes	NC_009442	23	17	0	0	0	0	0	0	0	0	0	0	23	17	3	6	2	2	5	0	8	3178	3178	2096309	234836	15023	319
Streptococcus_suis_98HAH33	chromosome	Firmicutes	NC_009443	24	18	0	0	0	0	0	0	0	0	0	0	24	18	2	6	2	2	5	1	8	3216	3216	2095698	235094	14832	326
Streptococcus_thermophilus_CNRZ1066	chromosome	Firmicutes	NC_006449	31	29	3	3	3	0	1	2	1	1	2	528	28	26	2	2	4	2	4	3	7	3840	4368	1796226	245688	23196	281
Streptococcus_thermophilus_LMD-9	plasmid_1	Firmicutes	NC_008500	0	0	0	0	0	0	0	0	0	0	0	0	0	0	0	0	0	0	0	0	0	0	0	4449	2027	0	0
Streptococcus_thermophilus_LMD-9	plasmid_2	Firmicutes	NC_008501	0	0	0	0	0	0	0	0	0	0	0	0	0	0	0	0	0	0	0	0	0	0	0	3361	292	0	0
Streptococcus_thermophilus_LMD-9	chromosome	Firmicutes	NC_008532	36	29	0	0	0	0	0	0	0	0	0	0	36	29	1	7	4	4	9	5	11	6817	6817	1856368	233411	86822	247
Streptococcus_thermophilus_LMG_18311	chromosome	Firmicutes	NC_006448	36	28	3	3	3	0	1	2	1	1	2	528	33	25	2	8	4	2	7	5	8	5069	5597	1796846	247732	28230	281
Streptomyces_avermitilis	chromosome_1_linear	Actinobacteria	NC_003155	65	65	3	3	0	0	1	1	1	0	0	717	62	62	2	0	2	14	6	0	0	9762	10479	9025608	1092970	174699	521
Streptomyces_avermitilis	plasmid_SAP1	Actinobacteria	NC_004719	0	0	0	0	0	0	0	0	0	0	0	0	0	0	0	0	0	0	0	0	0	0	0	94287	10520	865	9
Streptomyces_coelicolor	chromosome_1_linear	Actinobacteria	NC_003888	74	74	3	3	0	0	1	1	1	0	0	594	71	71	2	0	2	24	16	0	0	11678	12272	8667507	882750	166317	401
Streptomyces_coelicolor	plasmid_SCP1	Actinobacteria	NC_003903	0	0	0	0	0	0	0	0	0	0	0	0	0	0	0	0	0	0	0	0	0	0	0	356023	58270	11675	25
Streptomyces_coelicolor	plasmid_SCP2	Actinobacteria	NC_003904	0	0	0	0	0	0	0	0	0	0	0	0	0	0	0	0	0	0	0	0	0	0	0	31317	4763	931	2
Sulfurovum_NBC37-1	chromosome	Epsilonproteobacteria	NC_009663	0	0	0	0	0	0	0	0	0	0	0	0	0	0	0	0	0	0	0	0	0	0	0	2562277	208103	6705	81
Symbiobacterium_thermophilum_IAM14863	chromosome	Actinobacteria	NC_006177	7	4	1	1	0	0	1	0	0	0	0	54	6	3	1	3	0	0	1	0	0	811	865	3566135	390111	22547	413
Synechococcus_CC9311	chromosome	Cyanobacteria	NC_008319	8	8	0	0	0	0	0	0	0	0	0	0	8	8	0	0	1	0	2	1	0	1371	1371	2606748	286176	9854	153
Synechococcus_CC9605	chromosome	Cyanobacteria	NC_007516	21	21	0	0	0	0	0	0	0	0	0	0	21	21	0	0	1	0	5	1	2	4149	4149	2510659	238170	33105	185
Synechococcus_CC9902	chromosome	Cyanobacteria	NC_007513	12	12	0	0	0	0	0	0	0	0	0	0	12	12	1	0	0	0	1	0	0	1774	1774	2234828	204161	22589	125
Synechococcus_elongatus_PCC_6301	chromosome	Cyanobacteria	NC_006576	0	0	0	0	0	0	0	0	0	0	0	0	0	0	0	0	0	0	0	0	0	0	0	2696255	144300	1471	92
Synechococcus_elongatus_PCC_7942	plasmid_1	Cyanobacteria	NC_007595	0	0	0	0	0	0	0	0	0	0	0	0	0	0	0	0	0	0	0	0	0	0	0	46366	9357	0	2
Synechococcus_elongatus_PCC_7942	chromosome	Cyanobacteria	NC_007604	2	2	0	0	0	0	0	0	0	0	0	0	2	2	0	0	1	0	1	0	0	485	485	2695903	276502	1105	196
Synechococcus_RCC307	chromosome	Cyanobacteria	NC_009482	1	1	0	0	0	0	0	0	0	0	0	0	1	1	0	0	1	0	0	0	0	306	306	2224914	127360	2470	119
Synechococcus_sp_WH8102	chromosome	Cyanobacteria	NC_005070	21	21	0	0	0	0	0	0	0	0	0	0	21	21	1	0	1	1	2	0	0	4022	4022	2434428	194239	31690	117
Synechococcus_WH_7803	chromosome	Cyanobacteria	NC_009481	2	2	0	0	0	0	0	0	0	0	0	0	2	2	0	0	0	0	0	0	0	412	412	2366980	153414	7673	100
Synechocystis_PCC6803	chromosome	Cyanobacteria	NC_000911	1	1	0	0	0	0	0	0	0	0	0	0	1	1	0	0	0	0	0	0	0	135	135	3573470	451801	3940	231
Synechocystis_PCC6803	plasmid_pSYSM	Cyanobacteria	NC_005229	0	0	0	0	0	0	0	0	0	0	0	0	0	0	0	0	0	0	0	0	0	0	0	119895	19622	0	4
Synechocystis_PCC6803	plasmid_pSYSA	Cyanobacteria	NC_005230	0	0	0	0	0	0	0	0	0	0	0	0	0	0	0	0	0	0	0	0	0	0	0	103307	13193	2684	4
Synechocystis_PCC6803	plasmid_pSYSG	Cyanobacteria	NC_005231	0	0	0	0	0	0	0	0	0	0	0	0	0	0	0	0	0	0	0	0	0	0	0	44343	6559	0	2
Synechocystis_PCC6803	plasmid_pSYSX	Cyanobacteria	NC_005232	0	0	0	0	0	0	0	0	0	0	0	0	0	0	0	0	0	0	0	0	0	0	0	106004	12866	0	10
Syntrophobacter_fumaroxidans_MPOB	chromosome	Deltaproteobacteria	NC_008554	2	2	0	0	0	0	0	0	0	0	0	0	2	2	0	0	0	0	1	0	0	186	186	4990251	763038	17841	784
Syntrophomonas_wolfei_Goettingen	chromosome	Firmicutes	NC_008346	7	7	0	0	0	0	0	0	0	0	0	0	7	7	0	0	3	2	1	0	1	1117	1117	2936195	421316	28736	456
Syntrophus_aciditrophicus_SB	chromosome	Deltaproteobacteria	NC_007759	3	3	0	0	0	0	0	0	0	0	0	0	3	3	0	0	1	1	0	0	0	802	802	3179300	344274	5698	256
Thermoanaerobacter_tengcongensis	chromosome	Firmicutes	NC_003869	14	14	2	2	0	0	2	0	1	0	1	650	12	12	2	0	2	2	2	1	1	2467	3117	2689445	232607	63705	243
Thermobifida_fusca_YX	chromosome	Actinobacteria	NC_007333	6	6	1	1	0	0	1	0	0	0	0	273	5	5	0	0	1	0	0	0	0	585	858	3642249	489973	7630	331
Thermosipho_melanesiensis_BI429	chromosome	Thermotogae	NC_009616	6	6	0	0	0	0	0	0	0	0	0	0	6	6	0	0	3	0	1	0	3	945	945	1915238	107769	26337	157
Thermosynechococcus_elongatus	chromosome	Cyanobacteria	NC_004113	0	0	0	0	0	0	0	0	0	0	0	0	0	0	0	0	0	0	0	0	0	0	0	2593857	6897	23901	2
Thermotoga_maritima	chromosome	Thermotogae	NC_000853	19	19	2	2	0	0	1	1	1	0	1	367	17	17	1	0	2	1	6	1	5	3000	3367	1860725	74610	40915	70
Thermotoga_petrophila_RKU-1	chromosome	Thermotogae	NC_009486	9	9	0	0	0	0	0	0	0	0	0	0	9	9	1	0	2	1	5	1	4	1847	1847	1823511	25385	41346	31
Thermus_thermophilus_HB8	chromosome	Deinococcus-Thermus	NC_006461	2	2	2	2	0	0	2	0	0	0	1	624	0	0	0	0	0	0	0	0	0	0	624	1849742	73456	897	145
Thermus_thermophilus_HB8	plasmid_pTT27	Deinococcus-Thermus	NC_006462	0	0	0	0	0	0	0	0	0	0	0	0	0	0	0	0	0	0	0	0	0	0	0	256992	21663	3719	22
Thermus_thermophilus_HB8	plasmid_pTT8	Deinococcus-Thermus	NC_006463	0	0	0	0	0	0	0	0	0	0	0	0	0	0	0	0	0	0	0	0	0	0	0	9322	1065	0	2
Thermus_thermophilus_HB27	chromosome	Deinococcus-Thermus	NC_005835	2	2	2	2	0	0	2	0	1	0	1	624	0	0	0	0	0	0	0	0	0	0	624	1894877	77881	897	133
Thermus_thermophilus_HB27	plasmid_pTT27	Deinococcus-Thermus	NC_005838	1	1	0	0	0	0	0	0	0	0	0	0	1	1	0	0	0	0	0	0	0	375	375	232605	21996	1660	14
Thiobacillus_denitrificans_ATCC_25259	chromosome	Betaproteobacteria	NC_007404	2	2	0	0	0	0	0	0	0	0	0	0	2	2	0	0	2	0	0	0	0	373	373	2909809	206114	4485	307
Thiomicrospira_crunogena_XCL-2	chromosome	Gammaproteobacteria	NC_007520	0	0	0	0	0	0	0	0	0	0	0	0	0	0	0	0	0	0	0	0	0	0	0	2427734	217268	2294	236
Thiomicrospira_denitrificans_ATCC_33889	chromosome	Epsilonproteobacteria	NC_007575	0	0	0	0	0	0	0	0	0	0	0	0	0	0	0	0	0	0	0	0	0	0	0	2201561	135207	949	45
Treponema_denticola_ATCC_35405	chromosome	Spirochaetes	NC_002967	0	0	0	0	0	0	0	0	0	0	0	0	0	0	0	0	0	0	0	0	0	0	0	2843201	199539	8192	179
Treponema_pallidum	chromosome	Spirochaetes	NC_000919	0	0	0	0	0	0	0	0	0	0	0	0	0	0	0	0	0	0	0	0	0	0	0	1138011	63919	359	36
Trichodesmium_erythraeum_IMS101	chromosome	Cyanobacteria	NC_008312	1	1	0	0	0	0	0	0	0	0	0	0	1	1	0	0	0	0	0	0	1	130	130	7750108	1314870	164986	249
Tropheryma_whipplei_TW08_27	chromosome	Actinobacteria	NC_004551	0	0	0	0	0	0	0	0	0	0	0	0	0	0	0	0	0	0	0	0	0	0	0	925938	78620	1587	17
Tropheryma_whipplei_Twist	chromosome	Actinobacteria	NC_004572	0	0	0	0	0	0	0	0	0	0	0	0	0	0	0	0	0	0	0	0	0	0	0	927303	70532	964	12
Ureaplasma_urealyticum	chromosome	Firmicutes	NC_002162	1	1	1	1	0	0	1	0	0	0	0	395	0	0	0	0	0	0	0	0	0	0	395	751719	53304	555	42
Verminephrobacter_eiseniae_EF01-2	plasmid_pVEIS01	Betaproteobacteria	NC_008771	0	0	0	0	0	0	0	0	0	0	0	0	0	0	0	0	0	0	0	0	0	0	0	31194	4685	0	3
Verminephrobacter_eiseniae_EF01-2	chromosome	Betaproteobacteria	NC_008786	11	11	0	0	0	0	0	0	0	0	0	0	11	11	1	0	1	2	2	0	0	1705	1705	5566749	522899	63583	410
Vibrio_cholerae	chromosome_1	Gammaproteobacteria	NC_002505	41	27	25	16	4	9	18	3	10	2	5	5089	16	11	1	5	7	1	0	0	2	2829	7918	2961149	276932	62451	482
Vibrio_cholerae	chromosome_2	Gammaproteobacteria	NC_002506	37	15	9	8	0	1	6	0	0	0	4	1670	28	7	0	21	4	0	4	0	2	3418	5088	1072315	134298	46518	169
Vibrio_cholerae_O395	chromosome_1	Gammaproteobacteria	NC_009456	27	10	0	0	0	0	0	0	0	0	0	0	27	10	0	17	10	4	3	0	6	4247	4247	1108250	137938	28184	180
Vibrio_cholerae_O395	chromosome_2	Gammaproteobacteria	NC_009457	52	36	0	0	0	0	0	0	0	0	0	0	52	36	6	16	28	14	11	3	9	10808	10808	3024069	305935	52366	533
Vibrio_fischeri_ES114	chromosome_1	Gammaproteobacteria	NC_006840	41	29	5	5	1	0	5	3	0	0	3	840	36	24	6	12	5	4	4	0	6	7692	8532	2906179	335221	46987	431
Vibrio_fischeri_ES114	chromosome_2	Gammaproteobacteria	NC_006841	8	8	0	0	0	0	0	0	0	0	0	0	8	8	0	0	1	0	2	1	3	1121	1121	1332022	152034	5273	147
Vibrio_fischeri_ES114	plasmid_pES100	Gammaproteobacteria	NC_006842	0	0	0	0	0	0	0	0	0	0	0	0	0	0	0	0	0	0	0	0	0	0	0	45849	6024	1281	2
Vibrio_parahaemolyticus	chromosome_1	Gammaproteobacteria	NC_004603	55	55	9	9	1	0	8	4	3	0	5	1730	46	46	5	0	3	5	7	0	11	7384	9114	3288558	376287	81500	605
Vibrio_parahaemolyticus	chromosome_2	Gammaproteobacteria	NC_004605	18	18	5	5	2	0	5	4	0	1	5	1349	13	13	2	0	4	3	1	0	4	2709	4058	1877212	224783	23236	306
Vibrio_vulnificus_CMCP6	chromosome_1	Gammaproteobacteria	NC_004459	68	60	8	8	2	0	7	6	0	0	2	1760	60	52	5	8	5	5	12	2	9	9061	10821	3281945	391170	135668	559
Vibrio_vulnificus_CMCP6	chromosome_2	Gammaproteobacteria	NC_004460	14	14	4	4	1	0	4	4	1	1	3	893	10	10	2	0	2	3	0	0	2	2118	3011	1844853	235310	19878	279
Vibrio_vulnificus_YJ016	plasmid_pYJ016	Gammaproteobacteria	NC_005128	2	2	0	0	0	0	0	0	0	0	0	0	2	2	0	0	0	0	0	0	1	256	256	48508	7065	563	6
Vibrio_vulnificus_YJ016	chromosome_1	Gammaproteobacteria	NC_005139	74	51	7	7	1	0	7	5	1	0	2	1430	67	44	8	23	4	5	11	2	7	9421	10851	3354505	359776	107986	536
Vibrio_vulnificus_YJ016	chromosome_2	Gammaproteobacteria	NC_005140	13	13	3	3	1	0	3	0	1	1	3	774	10	10	3	0	2	3	0	0	1	2073	2847	1857073	192371	21725	287
Wigglesworthia_brevipalpis	plasmid_pWb1	Gammaproteobacteria	NC_003425	0	0	0	0	0	0	0	0	0	0	0	0	0	0	0	0	0	0	0	0	0	0	0	5280	1019	0	0
Wigglesworthia_brevipalpis	chromosome	Gammaproteobacteria	NC_004344	0	0	0	0	0	0	0	0	0	0	0	0	0	0	0	0	0	0	0	0	0	0	0	697724	73159	991	18
Wolbachia_endosymbiont_of_Brugia_malayi_TRS	chromosome	Alphaproteobacteria	NC_006833	0	0	0	0	0	0	0	0	0	0	0	0	0	0	0	0	0	0	0	0	0	0	0	1080084	172319	16011	15
Wolbachia_endosymbiont_of_Drosophila_melanogaster	chromosome	Alphaproteobacteria	NC_002978	1	1	0	0	0	0	0	0	0	0	0	0	1	1	0	0	1	0	0	0	0	171	171	1267782	163364	21391	59
Wolinella_succinogenes	chromosome	Epsilonproteobacteria	NC_005090	1	1	0	0	0	0	0	0	0	0	0	0	1	1	0	0	0	0	1	0	0	423	423	2110355	111981	4692	49
Xanthobacter_autotrophicus_Py2	plasmid_pXAUT01	Alphaproteobacteria	NC_009717	5	5	0	0	0	0	0	0	0	0	0	0	5	5	0	0	0	0	0	0	0	813	813	316164	44562	7917	22
Xanthobacter_autotrophicus_Py2	chromosome	Alphaproteobacteria	NC_009720	18	12	0	0	0	0	0	0	0	0	0	0	18	12	0	6	0	0	0	0	0	3010	3010	5308934	596086	38691	592
Xanthomonas_campestris	chromosome	Gammaproteobacteria	NC_003902	205	142	2	2	0	0	1	0	0	0	1	740	203	140	22	63	1	33	32	6	6	37656	38396	5076188	694063	214712	587
Xanthomonas_campestris_8004	chromosome	Gammaproteobacteria	NC_007086	191	123	2	2	0	0	1	0	0	0	1	741	189	121	23	68	1	25	22	3	7	34342	35083	5148708	694054	223194	595
Xanthomonas_campestris_vesicatoria_85-10	plasmid_pXCV2	Gammaproteobacteria	NC_007504	0	0	0	0	0	0	0	0	0	0	0	0	0	0	0	0	0	0	0	0	0	0	0	1852	355	0	0
Xanthomonas_campestris_vesicatoria_85-10	plasmid_pXCV19	Gammaproteobacteria	NC_007505	0	0	0	0	0	0	0	0	0	0	0	0	0	0	0	0	0	0	0	0	0	0	0	19146	1881	214	2
Xanthomonas_campestris_vesicatoria_85-10	plasmid_pXCV38	Gammaproteobacteria	NC_007506	1	1	0	0	0	0	0	0	0	0	0	0	1	1	0	0	0	0	0	0	0	389	389	38116	4487	927	2
Xanthomonas_campestris_vesicatoria_85-10	plasmid_pXCV183	Gammaproteobacteria	NC_007507	1	1	0	0	0	0	0	0	0	0	0	0	1	1	0	0	0	0	0	0	0	123	123	182572	23215	1549	10
Xanthomonas_campestris_vesicatoria_85-10	chromosome	Gammaproteobacteria	NC_007508	358	325	0	0	0	0	0	0	0	0	0	0	358	325	57	33	4	33	68	14	8	60284	60284	5178466	623878	391960	608
Xanthomonas_citri	chromosome	Gammaproteobacteria	NC_003919	334	302	2	2	1	0	1	1	0	0	1	443	332	300	59	32	0	34	48	8	5	56192	56635	5175554	676322	440130	549
Xanthomonas_citri	plasmid_pXAC33	Gammaproteobacteria	NC_003921	3	3	0	0	0	0	0	0	0	0	0	0	3	3	0	0	0	0	0	0	0	999	999	33700	5267	2171	6
Xanthomonas_citri	plasmid_pXAC64	Gammaproteobacteria	NC_003922	2	2	0	0	0	0	0	0	0	0	0	0	2	2	0	0	0	0	0	0	0	227	227	64920	9010	3336	5
Xanthomonas_oryzae_KACC10331	chromosome	Gammaproteobacteria	NC_006834	265	183	1	1	1	0	0	1	0	0	1	241	264	182	21	82	4	24	46	8	4	49335	49576	4941439	640497	495460	544
Xanthomonas_oryzae_MAFF_311018	chromosome	Gammaproteobacteria	NC_007705	289	212	0	0	0	0	0	0	0	0	0	0	289	212	29	77	3	23	54	9	6	53024	53024	4940217	737175	351065	605
Xylella_fastidiosa	chromosome	Gammaproteobacteria	NC_002488	5	5	0	0	0	0	0	0	0	0	0	0	5	5	0	0	0	0	2	0	0	723	723	2679306	378852	13560	168
Xylella_fastidiosa	plasmid_pXF1.3	Gammaproteobacteria	NC_002489	0	0	0	0	0	0	0	0	0	0	0	0	0	0	0	0	0	0	0	0	0	0	0	1286	177	0	1
Xylella_fastidiosa	plasmid_pXF51	Gammaproteobacteria	NC_002490	0	0	0	0	0	0	0	0	0	0	0	0	0	0	0	0	0	0	0	0	0	0	0	51158	6395	0	3
Xylella_fastidiosa_Temecula1	plasmid_pXFPD1.3	Gammaproteobacteria	NC_004554	0	0	0	0	0	0	0	0	0	0	0	0	0	0	0	0	0	0	0	0	0	0	0	1346	414	0	2
Xylella_fastidiosa_Temecula1	chromosome	Gammaproteobacteria	NC_004556	2	2	1	1	1	0	1	0	0	0	0	63	1	1	0	0	0	0	0	0	0	178	241	2519802	365536	34288	128
Yersinia_enterocolitica_8081	plasmid_pYVe8081	Gammaproteobacteria	NC_008791	6	6	0	0	0	0	0	0	0	0	0	0	6	6	0	0	0	0	0	0	2	1353	1353	67721	8754	13552	11
Yersinia_enterocolitica_8081	chromosome	Gammaproteobacteria	NC_008800	106	53	0	0	0	0	0	0	0	0	0	0	106	53	21	53	22	11	9	4	13	18222	18222	4615899	216155	297261	251
Yersinia_pestis_Antiqua	plasmid_pMT	Gammaproteobacteria	NC_008120	9	9	0	0	0	0	0	0	0	0	0	0	9	9	1	0	0	0	2	1	0	892	892	96471	14085	5616	15
Yersinia_pestis_Antiqua	plasmid_pPCP	Gammaproteobacteria	NC_008121	0	0	0	0	0	0	0	0	0	0	0	0	0	0	0	0	0	0	0	0	0	0	0	10777	1716	1376	2
Yersinia_pestis_Antiqua	plasmid_pCD	Gammaproteobacteria	NC_008122	5	5	0	0	0	0	0	0	0	0	0	0	5	5	0	0	0	0	1	0	1	658	658	70299	12029	13573	5
Yersinia_pestis_Antiqua	chromosome	Gammaproteobacteria	NC_008150	706	409	0	0	0	0	0	0	0	0	0	0	706	409	100	297	37	42	102	18	72	93556	93556	4702289	679091	636196	909
Yersinia_pestis_biovar_Mediaevails	chromosome	Gammaproteobacteria	NC_005810	635	399	16	11	4	5	14	11	3	5	5	2841	619	388	95	231	18	27	114	33	63	83335	86176	4595065	633012	655765	802
Yersinia_pestis_biovar_Mediaevails	plasmid_pCD1	Gammaproteobacteria	NC_005813	5	5	0	0	0	0	0	0	0	0	0	0	5	5	0	0	0	0	0	0	2	890	890	70159	12817	14094	7
Yersinia_pestis_biovar_Mediaevails	plasmid_pCRY	Gammaproteobacteria	NC_005814	1	1	0	0	0	0	0	0	0	0	0	0	1	1	0	0	0	0	0	0	0	323	323	21742	2608	468	2
Yersinia_pestis_biovar_Mediaevails	plasmid_pMT1	Gammaproteobacteria	NC_005815	7	7	0	0	0	0	0	0	0	0	0	0	7	7	2	0	0	0	2	1	1	689	689	106642	11470	6553	17
Yersinia_pestis_biovar_Mediaevails	plasmid_pPCP1	Gammaproteobacteria	NC_005816	1	1	0	0	0	0	0	0	0	0	0	0	1	1	0	0	0	0	0	0	1	150	150	9609	1509	1004	2
Yersinia_pestis_CO92	plasmid_pCD1	Gammaproteobacteria	NC_003131	1	1	0	0	0	0	0	0	0	0	0	0	1	1	0	0	0	0	0	0	1	400	400	70305	7562	18033	1
Yersinia_pestis_CO92	plasmid_pPCP1	Gammaproteobacteria	NC_003132	0	0	0	0	0	0	0	0	0	0	0	0	0	0	0	0	0	0	0	0	0	0	0	9612	661	1378	0
Yersinia_pestis_CO92	plasmid_pMT1	Gammaproteobacteria	NC_003134	10	10	0	0	0	0	0	0	0	0	0	0	10	10	2	0	0	0	2	1	0	1156	1156	96210	12012	6351	16
Yersinia_pestis_CO92	chromosome	Gammaproteobacteria	NC_003143	699	399	20	13	5	7	19	9	3	0	6	3288	679	386	96	293	19	31	95	18	64	88698	91986	4653728	673964	714758	892
Yersinia_pestis_KIM	chromosome	Gammaproteobacteria	NC_004088	645	397	17	13	3	4	16	11	0	4	5	3319	628	384	94	244	18	30	88	27	68	84694	88013	4600755	657571	657022	839
Yersinia_pestis_KIM	plasmid_pMT-1	Gammaproteobacteria	NC_004838	13	13	0	0	0	0	0	0	0	0	0	0	13	13	2	0	0	0	4	1	0	1427	1427	100990	11916	4707	18
Yersinia_pestis_Nepal516	plasmid_pMT	Gammaproteobacteria	NC_008118	9	9	0	0	0	0	0	0	0	0	0	0	9	9	1	0	0	0	2	1	0	885	885	100918	15664	6762	17
Yersinia_pestis_Nepal516	plasmid_pPCP	Gammaproteobacteria	NC_008119	0	0	0	0	0	0	0	0	0	0	0	0	0	0	0	0	0	0	0	0	0	0	0	10778	1705	1376	2
Yersinia_pestis_Nepal516	chromosome	Gammaproteobacteria	NC_008149	699	414	0	0	0	0	0	0	0	0	0	0	699	414	100	285	36	46	101	18	71	92504	92504	4534590	669847	626852	893
Yersinia_pestis_Pestoides_F	plasmid_CD	Gammaproteobacteria	NC_009377	4	4	0	0	0	0	0	0	0	0	0	0	4	4	0	0	0	0	1	0	0	529	529	71507	12321	14355	5
Yersinia_pestis_Pestoides_F	plasmid_MT	Gammaproteobacteria	NC_009378	13	13	0	0	0	0	0	0	0	0	0	0	13	13	2	0	0	0	1	1	1	1278	1278	137010	17868	7733	23
Yersinia_pestis_Pestoides_F	chromosome	Gammaproteobacteria	NC_009381	665	402	0	0	0	0	0	0	0	0	0	0	665	402	98	263	37	44	100	17	63	89146	89146	4517345	666448	666977	852
Yersinia_pseudotuberculosis_IP_31758	plasmid_plasmid_59kb	Gammaproteobacteria	NC_009704	0	0	0	0	0	0	0	0	0	0	0	0	0	0	0	0	0	0	0	0	0	0	0	58679	8676	434	8
Yersinia_pseudotuberculosis_IP_31758	plasmid_plasmid_153kb	Gammaproteobacteria	NC_009705	0	0	0	0	0	0	0	0	0	0	0	0	0	0	0	0	0	0	0	0	0	0	0	153140	23042	0	21
Yersinia_pseudotuberculosis_IP_31758	chromosome	Gammaproteobacteria	NC_009708	529	405	0	0	0	0	0	0	0	0	0	0	529	405	83	124	26	34	80	19	54	76583	76583	4723306	692752	637022	716
Yersinia_pseudotuberculosis_IP32953	plasmid_pYV	Gammaproteobacteria	NC_006153	7	7	0	0	0	0	0	0	0	0	0	0	7	7	0	0	0	0	1	0	2	1171	1171	68525	11040	13623	7
Yersinia_pseudotuberculosis_IP32953	plasmid_pYptb32953	Gammaproteobacteria	NC_006154	0	0	0	0	0	0	0	0	0	0	0	0	0	0	0	0	0	0	0	0	0	0	0	27702	4317	231	2
Yersinia_pseudotuberculosis_IP32953	chromosome	Gammaproteobacteria	NC_006155	527	436	15	15	3	0	13	9	0	0	5	2426	512	421	82	91	12	24	92	6	61	75966	78392	4744671	689387	673416	696
Zymomonas_mobilis_ZM4	chromosome	Alphaproteobacteria	NC_006526	4	4	1	1	0	0	1	0	0	0	0	57	3	3	1	0	0	0	0	0	0	707	764	2056416	239268	17956	238
Total				47273	38913	1674	1448	375	226	1398	1166	573	439	740	361688	45599	37465	6561	8134	3962	4722	8028	1978	6893	7254799	7616487	1880584646	206768646	65602178	202270
