# Supplementary material for: High-Throughput, Kingdom-Wide Prediction and Annotation of Bacterial Non-Coding RNAs
Source: PLoS One. 2008 Sep 12;3(9):e3197. doi: 10.1371/journal.pone.0003197 (PMC2527527; doi:10.1371/journal.pone.0003197)
Supplement: Table S2 — All predicted loci with homology to previously predicted and/or confirmed ncRNAs in our database (5.43 MB XLS) [file pone.0003197.s002.xls]

Acidiphilium_cryptum_JF-5	|	Candidate_1_NC_009484	|	Acry_2885		N-acetylmuramoyl-L-alanine amidase, family 2	*	>>>	185	|	3151449	3151523	<<<	74	|	271	>>>	Acry_2886	DNA gyrase, B subunit	*	candidate	387	2.9e-16	F		181	RNA	Escherichia_coli_K12_chromosome<>Mycobacterium_tuberculosis_H37Rv_chromosome<>Vibrio_cholerae_chromosome_1<>Pseudomonas_aeruginosa_chromosome<>Escherichia_coli_O157H7_EDL933_chromosome<>Mycobacterium_leprae_chromosome<>Mesorhizobium_loti_chromosome<>Escherichia_coli_O157H7_chromosome<>Caulobacter_crescentus_chromosome<>Mycobacterium_tuberculosis_CDC1551_chromosome<>Corynebacterium_diphtheriae_chr…	NC_003047_RNaseP_bact_a(-)_-_(hom|rev)|NC_002516_P28_yes(+)_+_(hom)|NC_000913_rnpB(-)_-_(hom|rev)|NC_002505_rnpB(-)_-_(hom|rev)|NC_003112_RNaseP_bact_a(-)_-_(hom|rev)|NC_005072_RNaseP_bact_a(+)_+_(hom|rev)	1	Candidate_2_NC_009484(tandem)	-	-	-	-
Acidiphilium_cryptum_JF-5	|	Candidate_2_NC_009484	|	Acry_2885		N-acetylmuramoyl-L-alanine amidase, family 2	*	>>>	235	|	3151499	3151550	<<<	51	|	244	>>>	Acry_2886	DNA gyrase, B subunit	*	candidate	492	1.2e-16	F		118	RNA	Mycobacterium_tuberculosis_H37Rv_chromosome<>Vibrio_cholerae_chromosome_1<>Mycobacterium_leprae_chromosome<>Mesorhizobium_loti_chromosome<>Caulobacter_crescentus_chromosome<>Mycobacterium_tuberculosis_CDC1551_chromosome<>Corynebacterium_diphtheriae_chromosome<>Desulfovibrio_vulgaris_Hildenborough_chromosome<>Mycobacterium_bovis_chromosome<>Pseudomonas_putida_KT2440_chromosome<>Methylococcus_capsu…	NC_003047_RNaseP_bact_a(-)_-_(hom|rev)|NC_002516_P28_yes(+)_+_(hom)|NC_000913_rnpB(-)_-_(hom|rev)|NC_002505_rnpB(-)_-_(hom|rev)|NC_003112_RNaseP_bact_a(-)_-_(hom|rev)|NC_005072_RNaseP_bact_a(+)_+_(hom|rev)	1	Candidate_1_NC_009484(tandem)	-	-	-	-
Acidothermus_cellulolyticus_11B	|	Candidate_1_NC_008578	|	Acel_1274		riboflavin biosynthesis protein RibD	*	<<<	-1	|	1421943	1422164	<<<	221	|	88	<<<	Acel_1275	diguanylate cyclase	*	candidate	503	3.7e-17	T		4	RNA	Streptomyces_avermitilis_chromosome_1_linear<>Streptomyces_coelicolor_chromosome_1_linear<>Frankia_CcI3_chromosome<>Frankia_alni_ACN14a_chromosome	NC_000913_SroG(-)_-_(hom)|NC_003047_RFN(+)_+_(hom)	0	-	-	5	-	-
Acidothermus_cellulolyticus_11B	|	Candidate_2_NC_008578	|	Acel_0905		Mannitol dehydrogenase, C-terminal domain	*	>>>	134	|	999621	999747	<<<	126	|	297	>>>	Acel_0906	Extracellular ligand-binding receptor	*	candidate	208	8.3e-17	F		107	RNA	Escherichia_coli_K12_chromosome<>Vibrio_cholerae_chromosome_1<>Escherichia_coli_O157H7_chromosome<>Desulfovibrio_vulgaris_Hildenborough_chromosome<>Agrobacterium_tumefaciens_C58_Cereon_chromosome_1_circular<>Yersinia_pestis_CO92_chromosome<>Streptomyces_avermitilis_chromosome_1_linear<>Salmonella_typhimurium_LT2_chromosome<>Salmonella_typhi_chromosome<>Agrobacterium_tumefaciens_C58_UWash_chromoso…	NC_000913_rnpB(-)_-_(hom|rev)|NC_002505_rnpB(-)_-_(hom|rev)|NC_003047_RNaseP_bact_a(-)_-_(hom|rev)|NC_003112_RNaseP_bact_a(-)_-_(hom|rev)|NC_002516_P28_yes(+)_+_(hom)	0	-	-	-	-	-
Acidovorax_avenae_citrulli_AAC00-1	|	Candidate_17_NC_008752	|	Aave_3276		hypothetical protein	*	<<<	82	|	3621537	3621707	<<<	170	|	268	<<<	Aave_3277	phosphoglycolate phosphatase	*	candidate	299	5e-19	Y		29	RNA	Ralstonia_solanacearum_chromosome<>Nitrosomonas_europaea_chromosome<>Chromobacterium_violaceum_chromosome<>Burkholderia_mallei_ATCC_23344_chromosome_1<>Burkholderia_pseudomallei_K96243_chromosome_1<>Burkholderia_pseudomallei_1710b_chromosome_1<>Burkholderia_383_chromosome_1<>Nitrosospira_multiformis_ATCC_25196_chromosome_1<>Burkholderia_thailandensis_E264_chromosome_1<>Rhodoferax_ferrireducens_T1…	NC_000913_tmRNA(+)_+_(hom)|NC_002505_tmRNA(-)_-_(hom)	0	-	-	-	-	-
Acidovorax_JS42	|	Candidate_29_NC_008782	|	Ajs_2460		phage integrase family protein	*	<<<	157	|	2618092	2618328	<<<	236	|	202	<<<	Ajs_2461	phosphoglycolate phosphatase	*	candidate	363	4.4e-25	T		26	RNA	Chromobacterium_violaceum_chromosome<>Burkholderia_mallei_ATCC_23344_chromosome_1<>Burkholderia_pseudomallei_K96243_chromosome_1<>Ralstonia_eutropha_JMP134_chromosome_1<>Burkholderia_pseudomallei_1710b_chromosome_1<>Burkholderia_383_chromosome_1<>Burkholderia_thailandensis_E264_chromosome_1<>Rhodoferax_ferrireducens_T118_chromosome<>Polaromonas_JS666_chromosome<>Burkholderia_xenovorans_LB400_chro…	NC_000913_tmRNA(+)_+_(hom)|NC_002505_tmRNA(-)_-_(hom)	0	-	-	-	-	-
Acidovorax_JS42	|	Candidate_36_NC_008782	|	Ajs_1095		hypothetical protein	*	<<<	229	|	1149822	1149895	<<<	73	|	55	>>>	Ajs_1096	TonB-dependent receptor	*	candidate	713	9.2e-27	F		4	RNA	Rhodoferax_ferrireducens_T118_chromosome<>Polaromonas_JS666_chromosome<>Polaromonas_naphthalenivorans_CJ2_chromosome<>Verminephrobacter_eiseniae_EF01-2_chromosome	NC_002516_Cobalamin2(+)_+_(hom|rev)	0	-	-	-	-	-
Acinetobacter_baumannii_ATCC_17978	|	Candidate_16_NC_009085	|	A1S_0910		gamma-glutamyltranspeptidase precursor	*	>>>	175	|	1055807	1056197	>>>	390	|	204	>>>	A1S_0911	hypothetical protein	*	candidate	577	1e-20	Z		30	RNA	Pseudomonas_aeruginosa_chromosome<>Shewanella_oneidensis_chromosome<>Idiomarina_loihiensis_L2TR_chromosome<>Psychrobacter_arcticum_273-4_chromosome<>Ralstonia_eutropha_JMP134_chromosome_1<>Pseudoalteromonas_haloplanktis_TAC125_chromosome_1<>Nitrosococcus_oceani_ATCC_19707_chromosome<>Hahella_chejuensis_KCTC_2396_chromosome<>Methylobacillus_flagellatus_KT_chromosome<>Psychrobacter_cryohalolentis_K…	NC_002516_tmRNA(-)_-_(hom)|NC_003112_tmRNA(-)_-_(hom)|NC_000913_tmRNA(+)_+_(hom)|NC_002745_tmRNA(+)_+_(hom)|NC_002505_tmRNA(-)_-_(hom)	1	Candidate_14_NC_009085(tandem)	-	-	-	-E.coli_sig70_3(7.55|-427)
Acinetobacter_sp_ADP1	|	Candidate_5_NC_005966	|	ACIAD2911		aspartate 1-decarboxylase precursor	*	>>>	17	|	2846942	2847312	<<<	370	|	0	>>>	ACIAD2913	3,4 dihydroxy-2-butanone-4-phosphate synthase	*	candidate	599	6.9e-21	R		1	RNA	Acinetobacter_baumannii_ATCC_17978_chromosome	NC_000913_SroG(-)_-_(hom|rev)|NC_003047_RFN(+)_+_(hom|rev)|NC_002506_RFN(-)_-_(hom|rev)|NC_002516_RFN(-)_-_(hom|rev)	0	-	-	-	-	-
Acinetobacter_sp_ADP1	|	Candidate_25_NC_005966	|	ACIAD3045		hypothetical protein	*	<<<	2	|	2975474	2975679	>>>	205	|	11	<<<	ACIAD3046	50S ribosomal protein L20	*	candidate	568	6.3e-20	X		1	RNA	Acinetobacter_baumannii_ATCC_17978_chromosome	NC_005072_yfr4(+)_+_(hom)	0	-	-	-	-	-
Acinetobacter_sp_ADP1	|	tmRNA_NC_005966	|	ACIAD0930		glycerol kinase	*	<<<	132	|	914850	915252	>>>	402	|	207	<<<	ACIAD0931	hypothetical protein	*	tmRNA	712	1e-26	F		32	RNA	Pseudomonas_aeruginosa_chromosome<>Coxiella_burnetii_chromosome<>Salmonella_typhimurium_LT2_chromosome<>Salmonella_typhi_chromosome<>Shewanella_oneidensis_chromosome<>Idiomarina_loihiensis_L2TR_chromosome<>Psychrobacter_arcticum_273-4_chromosome<>Ralstonia_eutropha_JMP134_chromosome_1<>Nitrosococcus_oceani_ATCC_19707_chromosome<>Thiomicrospira_crunogena_XCL-2_chromosome<>Hahella_chejuensis_KCTC_2…	NC_002516_tmRNA(-)_-_(hom)|NC_000913_tmRNA(+)_+_(hom)|NC_003112_tmRNA(-)_-_(hom)|NC_002745_tmRNA(+)_+_(hom)|NC_002505_tmRNA(-)_-_(hom)	0	-	-	-	-	-
Actinobacillus_pleuropneumoniae_L20	|	Candidate_3_NC_009053	|	APL_0525		hypothetical protein	*	>>>	790	|	599947	600097	>>>	150	|	19	>>>	APL_0526	hypothetical protein	*	candidate	206	1.7e-28	B		117	RNA	Haemophilus_influenzae_chromosome<>Escherichia_coli_K12_chromosome<>Xylella_fastidiosa_chromosome<>Pseudomonas_aeruginosa_chromosome<>Pasteurella_multocida_chromosome<>Mesorhizobium_loti_chromosome<>Escherichia_coli_O157H7_chromosome<>Pseudomonas_putida_KT2440_chromosome<>Coxiella_burnetii_chromosome<>Clostridium_acetobutylicum_chromosome<>Neisseria_meningitidis_Z2491_chromosome<>Yersinia_pestis_…	NC_000913_rnpB(-)_-_(hom)|NC_002516_P28_yes(+)_+_(hom|rev)|NC_003112_RNaseP_bact_a(-)_-_(hom)|NC_002505_rnpB(-)_-_(hom)|NC_005072_RNaseP_bact_a(+)_+_(hom)	1	Candidate_2_NC_009053(tandem)	-	5	RS	-
Actinobacillus_pleuropneumoniae_L20	|	Candidate_10_NC_009053	|	APL_0130		putative GTPase EngC	*	<<<	203	|	146331	146604	<<<	273	|	32	>>>	APL_0131	glycine cleavage system transcriptional	*	candidate	1054	4.4e-42	X		1	RNA	Haemophilus_ducreyi_35000HP_chromosome	NC_000913_gcvB_IS145(+)_+_(hom)	0	-	-	-	-	-E.coli_sig70_2(10.96|-202)
Actinobacillus_succinogenes_130Z	|	Candidate_1_NC_009655	|	Asuc_1258		phage integrase family protein	*	<<<	85	|	1402568	1402625	>>>	57	|	463	<<<	Asuc_1259	protein of unknown function DUF440	*	candidate	506	2.2e-17	R		11	-	Pasteurella_multocida_chromosome<>Oceanobacillus_iheyensis_chromosome<>Salmonella_typhi_Ty2_chromosome<>Vibrio_vulnificus_YJ016_chromosome_1<>Mannheimia_succiniciproducens_MBEL55E_chromosome<>Nitrosospira_multiformis_ATCC_25196_chromosome_1<>Haemophilus_somnus_129PT_chromosome<>Shewanella_MR-7_chromosome<>Nitrosomonas_eutropha_C71_chromosome<>Shewanella_ANA-3_chromosome_1<>Yersinia_enterocolitica…	NC_003112_tmRNA(-)_-_(hom|rev)	0	Candidate_9_NC_009655(anti)	-	-	-	-
Actinobacillus_succinogenes_130Z	|	Candidate_9_NC_009655	|	Asuc_1258		phage integrase family protein	*	<<<	118	|	1402601	1402846	<<<	245	|	242	<<<	Asuc_1259	protein of unknown function DUF440	*	candidate	315	3.2e-26	T		64	-	Haemophilus_influenzae_chromosome<>Escherichia_coli_K12_chromosome<>Vibrio_cholerae_chromosome_1<>Buchnera_sp_chromosome<>Pasteurella_multocida_chromosome<>Haemophilus_ducreyi_35000HP_chromosome<>Neisseria_gonorrhoeae_FA_1090_chromosome<>Neisseria_meningitidis_MC58_chromosome<>Neisseria_meningitidis_Z2491_chromosome<>Yersinia_pestis_CO92_chromosome<>Salmonella_typhimurium_LT2_chromosome<>Salmonel…	NC_000913_tmRNA(+)_+_(hom)|NC_002505_tmRNA(-)_-_(hom)|NC_003112_tmRNA(-)_-_(hom)|NC_002745_tmRNA(+)_+_(hom)	0	Candidate_1_NC_009655(anti)	-	-	-	-
Actinobacillus_succinogenes_130Z	|	Candidate_15_NC_009655	|	Asuc_1670		cytochrome c class I	*	>>>	51	|	1833820	1833898	<<<	78	|	540	>>>	Asuc_1671	KpsF/GutQ family protein	*	candidate	137	7.3e-39	X		138	RNA	Haemophilus_influenzae_chromosome<>Escherichia_coli_K12_chromosome<>Xylella_fastidiosa_chromosome<>Pseudomonas_aeruginosa_chromosome<>Buchnera_sp_chromosome<>Pasteurella_multocida_chromosome<>Escherichia_coli_O157H7_chromosome<>Haemophilus_ducreyi_35000HP_chromosome<>Pseudomonas_putida_KT2440_chromosome<>Coxiella_burnetii_chromosome<>Methylococcus_capsulatus_Bath_chromosome<>Clostridium_acetobuty…	NC_002516_P28_yes(+)_+_(hom|rev)|NC_000913_rnpB(-)_-_(hom)|NC_005072_RNaseP_bact_a(+)_+_(hom)	0	Candidate_11_NC_009655(anti)	-	-	-	-
Aeromonas_hydrophila_ATCC_7966	|	Candidate_19_NC_008570	|	AHA_2012		ATP-dependent Clp protease, ATP-binding subunit	*	>>>	24	|	2216619	2216735	<<<	116	|	0	>>>	AHA_2013	ATP-dependent protease La	*	candidate	650	2.9e-23	R		1	-	Aeromonas_salmonicida_A449_chromosome	NC_000913_sraA_t15_psrA3(-)_-_(hom)	0	-	sraA_t15_psrA3_NC_000913|UD(5'(1-1)|3'(0-0))	-	-	-
Aeromonas_hydrophila_ATCC_7966	|	Candidate_24_NC_008570	|	AHA_0438		hemolysin	*	>>>	23	|	468015	468226	<<<	211	|	267	>>>	AHA_0439	thiamine biosynthesis protein ThiC	*	candidate	958	1.3e-53	R		1	-	Aeromonas_salmonicida_A449_chromosome	NC_000913_THI2(-)_-_(hom|rev)|NC_002505_THI1(+)_+_(hom|rev)|NC_003047_THI(+)_+_(hom|rev)	0	-	-	-	-	-
Aeromonas_hydrophila_ATCC_7966	|	Candidate_35_NC_008570	|	AHA_1441		hypothetical protein	*	>>>	291	|	1577915	1577980	>>>	65	|	199	<<<	AHA_1443	SsrA-binding protein	*	candidate	597	4.6e-21	T		82	-	Haemophilus_influenzae_chromosome<>Escherichia_coli_K12_chromosome<>Xylella_fastidiosa_chromosome<>Vibrio_cholerae_chromosome_1<>Escherichia_coli_O157H7_EDL933_chromosome<>Pasteurella_multocida_chromosome<>Escherichia_coli_O157H7_chromosome<>Haemophilus_ducreyi_35000HP_chromosome<>Yersinia_pestis_CO92_chromosome<>Salmonella_typhimurium_LT2_chromosome<>Salmonella_typhi_chromosome<>Buchnera_aphidic…	NC_000913_tmRNA(+)_+_(hom|rev)|NC_002505_tmRNA(-)_-_(hom|rev)|NC_002516_tmRNA(-)_-_(hom|rev)|NC_003112_tmRNA(-)_-_(hom|rev)|NC_002745_tmRNA(+)_+_(hom|rev)	1	Candidate_34_NC_008570(tandem),Candidate_36_NC_008570(tandem),Candidate_84_NC_008570(opp)	-	-	-	-
Aeromonas_hydrophila_ATCC_7966	|	Candidate_64_NC_008570	|	AHA_0976		proline sensor PrlS	*	>>>	178	|	1055626	1055819	<<<	193	|	0	>>>	AHA_0977	chitinase A	*	candidate	1501	1.4e-61	F		1	-	Aeromonas_salmonicida_A449_chromosome	NC_002505_GEMM(+)_+_(hom|rev)	0	-	-	-	-	-
Aeromonas_hydrophila_ATCC_7966	|	Candidate_84_NC_008570	|	AHA_1441		hypothetical protein	*	>>>	35	|	1577659	1577780	<<<	121	|	399	<<<	AHA_1443	SsrA-binding protein	*	candidate	233	3.8e-21	Z		84	RNA	Haemophilus_influenzae_chromosome<>Escherichia_coli_K12_chromosome<>Xylella_fastidiosa_chromosome<>Vibrio_cholerae_chromosome_1<>Escherichia_coli_O157H7_EDL933_chromosome<>Pasteurella_multocida_chromosome<>Escherichia_coli_O157H7_chromosome<>Haemophilus_ducreyi_35000HP_chromosome<>Yersinia_pestis_CO92_chromosome<>Salmonella_typhimurium_LT2_chromosome<>Salmonella_typhi_chromosome<>Colwellia_psychr…	NC_000913_tmRNA(+)_+_(hom)|NC_002505_tmRNA(-)_-_(hom)|NC_002516_tmRNA(-)_-_(hom)|NC_003112_tmRNA(-)_-_(hom)|NC_002745_tmRNA(+)_+_(hom)	0	Candidate_34_NC_008570(anti),Candidate_35_NC_008570(opp),Candidate_36_NC_008570(anti)	-	-	-	-
Aeromonas_hydrophila_ATCC_7966	|	Candidate_97_NC_008570	|	AHA_1713		multidrug resistance protein D	*	>>>	127	|	1876933	1877169	<<<	236	|	0	<<<	AHA_1714	hypothetical protein	*	candidate	1049	1.4e-41	Z		1	RNA	Aeromonas_salmonicida_A449_chromosome	NC_002505_6S(+)_+_(hom)|NC_000913_6S(+)_+_(hom)	0	-	-	-	-	-
Aeromonas_hydrophila_ATCC_7966	|	Candidate_115_NC_008570	|	AHA_2261		hypothetical protein	*	>>>	49	|	2493729	2493893	<<<	164	|	6	<<<	AHA_2262	Sun/nucleolar protein family protein	*	candidate	762	1.7e-28	Z		1	RNA	Aeromonas_salmonicida_A449_chromosome	NC_000913_sraC_ryeA_tpke79_IS091(+)_+_(hom|rev)	0	-	-	-	-	-
Aeromonas_hydrophila_ATCC_7966	|	Candidate_131_NC_008570	|	AHA_2608		Alx protein	*	<<<	20	|	2905995	2906252	<<<	257	|	15	<<<	AHA_2609	oligopeptide ABC transporter, ATP-binding	*	candidate	1123	5.9e-45	Y		1	RNA	Aeromonas_salmonicida_A449_chromosome	NC_000913_sraF_tpk1_IS160(+)_+_(hom)	0	Candidate_132_NC_008570(anti)	sraF_tpk1_IS160_NC_000913|3'(0)	5	-	-
Aeromonas_hydrophila_ATCC_7966	|	Candidate_134_NC_008570	|	AHA_0267		hypothetical protein	*	>>>	129	|	290712	290913	>>>	201	|	459	<<<	AHA_0268	GTP-binding protein YihA	*	candidate	494	8.3e-17	Z		5	RNA	Vibrio_parahaemolyticus_chromosome_1<>Yersinia_pseudotuberculosis_IP32953_chromosome<>Photobacterium_profundum_SS9_chromosome_1<>Aeromonas_salmonicida_A449_chromosome<>Yersinia_pseudotuberculosis_IP_31758_chromosome	NC_002505_Spot_42(+)_+_(hom)|NC_000913_spot42(+)_+_(hom)|NC_002745_gcvT(-)_-_(hom|rev)	1	Candidate_133_NC_008570(tandem),Candidate_135_NC_008570(tandem)	spot42_NC_000913|3'(0)	-	-	-
Aeromonas_hydrophila_ATCC_7966	|	Candidate_135_NC_008570	|	AHA_0267		hypothetical protein	*	>>>	2	|	290585	291079	>>>	494	|	293	<<<	AHA_0268	GTP-binding protein YihA	*	candidate	471	6.1e-16	Y		1	RNA	Aeromonas_salmonicida_A449_chromosome	NC_002505_Spot_42(+)_+_(hom)|NC_000913_spot42(+)_+_(hom)|NC_002745_gcvT(-)_-_(hom|rev)	1	Candidate_134_NC_008570(tandem)	spot42_NC_000913|3'(0)	-	-	-E.coli_sig70_1(7.54|-115)
Aeromonas_hydrophila_ATCC_7966	|	Candidate_139_NC_008570	|	trRNA		trRNA	*	>>>	6	|	29711	29890	<<<	179	|	107	>>>	AHA_0028	ricin-type beta-trefoil lectin domain, putative	*	candidate	588	1.3e-20	X		1	RNA	Aeromonas_salmonicida_A449_chromosome	NC_000913_IstR1(-)_-_(hom|rev)|NC_000913_IstR2(-)_-_(hom|rev)	0	-	-	-	-	-
Aeromonas_hydrophila_ATCC_7966	|	Candidate_155_NC_008570	|	AHA_0329		preprotein translocase, SecY subunit	*	>>>	142	|	346090	346151	>>>	61	|	76	>>>	AHA_0330	ribosomal protein S13p/S18e	*	candidate	695	2.7e-25	Y		11	RNA	Escherichia_coli_CFT073_chromosome<>Vibrio_vulnificus_CMCP6_chromosome_1<>Photorhabdus_luminescens_chromosome<>Vibrio_vulnificus_YJ016_chromosome_1<>Yersinia_pestis_Nepal516_chromosome<>Yersinia_pestis_Antiqua_chromosome<>Escherichia_coli_APEC_O1_chromosome<>Aeromonas_salmonicida_A449_chromosome<>Yersinia_pestis_Pestoides_F_chromosome<>Klebsiella_pneumoniae_MGH_78578_chromosome<>Yersinia_pseudotu…	NC_000913_Alpha_RBS(-)_-_(hom)	0	-	Alpha_RBS_NC_000913|UD(5'(0-1)|3'(0-0))	5	-	-
Aeromonas_hydrophila_ATCC_7966	|	Candidate_204_NC_008570	|	AHA_3893		MraZ protein	*	<<<	408	|	4326586	4326660	<<<	74	|	479	<<<	AHA_3894	tetrapyrrole methylase family protein	*	candidate	150	1.7e-25	Z		109	RNA	Mycobacterium_tuberculosis_H37Rv_chromosome<>Xylella_fastidiosa_chromosome<>Vibrio_cholerae_chromosome_1<>Pseudomonas_aeruginosa_chromosome<>Mesorhizobium_loti_chromosome<>Mycobacterium_tuberculosis_CDC1551_chromosome<>Desulfovibrio_vulgaris_Hildenborough_chromosome<>Mycobacterium_bovis_chromosome<>Pseudomonas_putida_KT2440_chromosome<>Methylococcus_capsulatus_Bath_chromosome<>Agrobacterium_tumef…	NC_002505_rnpB(-)_-_(hom)|NC_003047_RNaseP_bact_a(-)_-_(hom)	0	-	-	-	-	-
Aeromonas_hydrophila_ATCC_7966	|	Candidate_207_NC_008570	|	AHA_3962		hypothetical protein	*	>>>	59	|	4393151	4393499	<<<	348	|	0	>>>	AHA_3963	colicin I receptor	*	candidate	686	7.4e-25	F		1	RNA	Aeromonas_salmonicida_A449_chromosome	NC_000913_rpsI(-)_-_(hom|rev)	1	Candidate_125_NC_008570(para)	-	-	-	-Multi_Fur(17.66|-161)
Aeromonas_hydrophila_ATCC_7966	|	Candidate_217_NC_008570	|	AHA_4096		transcriptional regulator, CopG family	*	>>>	298	|	4536912	4537183	>>>	271	|	31	<<<	AHA_4097	methyl-accepting chemotaxis protein	*	candidate	468	9.2e-16	Z		1	-	Photobacterium_profundum_SS9_chromosome_2	NC_000913_csrB(-)_-_(hom)	0	-	-	-	-	-E.coli_sig70_1(8.2|-281)
Aeromonas_hydrophila_ATCC_7966	|	Candidate_219_NC_008570	|	AHA_4124		regulator of ribonuclease activity A	*	>>>	11	|	4573182	4573438	<<<	256	|	0	<<<	AHA_4125	hypothetical protein	*	candidate	1034	6.8e-41	Z		1	RNA	Aeromonas_salmonicida_A449_chromosome	NC_000913_sraI_ryhB_IS176(-)_-_(hom)|NC_002505_RyhB(+)_+_(hom)	0	Candidate_58_NC_008570(anti)	-	-	-	-Multi_Fur(15.33|-172)E.coli_sig70_2(8.17|-173)
Aeromonas_hydrophila_ATCC_7966	|	Candidate_220_NC_008570	|	AHA_4124		regulator of ribonuclease activity A	*	>>>	67	|	4573238	4573438	<<<	200	|	0	<<<	AHA_4125	hypothetical protein	*	candidate	1034	6.8e-41	Z		1	RNA	Aeromonas_salmonicida_A449_chromosome	NC_000913_sraI_ryhB_IS176(-)_-_(hom)|NC_002505_RyhB(+)_+_(hom)	0	Candidate_58_NC_008570(anti)	-	-	-	-Multi_Fur(15.33|-116)E.coli_sig70_2(8.17|-117)
Aeromonas_hydrophila_ATCC_7966	|	Candidate_239_NC_008570	|	AHA_0646		nucleoside permease	*	>>>	71	|	696603	696773	<<<	170	|	20	<<<	AHA_0647	methylated-DNA--protein-cysteine	*	candidate	1076	7.2e-43	Z		1	RNA	Aeromonas_salmonicida_A449_chromosome	NC_000913_oxyS(-)_-_(hom)	0	-	-	-	-	-
Aeromonas_salmonicida_A449	|	Candidate_10_NC_009348	|	ASA_4129		GTP binding protein	*	>>>	325	|	4423186	4423672	<<<	486	|	0	<<<	ASA_4131	hypothetical protein	*	candidate	471	6.2e-16	R		1	RNA	Aeromonas_hydrophila_ATCC_7966_chromosome	NC_002505_Spot_42(+)_+_(hom)|NC_000913_spot42(+)_+_(hom)	1	Candidate_206_NC_009348(tandem)	spot42_NC_000913|3'(0)	-	-	-
Aeromonas_salmonicida_A449	|	Candidate_19_NC_009348	|	ASA_1890		ATP-dependent Clp protease, ATP-binding subunit	*	>>>	24	|	2003519	2003635	<<<	116	|	0	>>>	ASA_1891	ATP-dependent protease La	*	candidate	650	2.9e-23	R		1	-	Aeromonas_hydrophila_ATCC_7966_chromosome	NC_000913_sraA_t15_psrA3(-)_-_(hom)	0	-	sraA_t15_psrA3_NC_000913|UD(5'(1-1)|3'(0-0))	-	-	-
Aeromonas_salmonicida_A449	|	Candidate_92_NC_009348	|	ASA_1702		ABC-type oligopeptide transporter, ATP-binding	*	>>>	24	|	1787513	1787770	>>>	257	|	14	>>>	ASA_1703	transport protein Alx	*	candidate	1123	6e-45	Y		1	RNA	Aeromonas_hydrophila_ATCC_7966_chromosome	NC_000913_sraF_tpk1_IS160(+)_+_(hom)	0	-	sraF_tpk1_IS160_NC_000913|3'(0),yybP1ykoY_NC_002506|3'(0)	5	-	-
Aeromonas_salmonicida_A449	|	Candidate_102_NC_009348	|	ASA_0187		conserved integral membrane protein	*	>>>	1	|	197324	197525	>>>	201	|	68	<<<	ASA_0189	regulator of ribonuclease activity A	*	candidate	1034	6.8e-41	Z		1	RNA	Aeromonas_hydrophila_ATCC_7966_chromosome	NC_002505_RyhB(+)_+_(hom)|NC_003047_C15(-)_-_(hom)	0	-	-	-	-	-Multi_Fur(15.33|-117)
Aeromonas_salmonicida_A449	|	Candidate_111_NC_009348	|	ASA_2044		Sun/nucleolar protein family protein	*	>>>	11	|	2174645	2174809	>>>	164	|	27	<<<	ASA_2045	hypothetical protein	*	candidate	762	1.6e-28	Z		1	RNA	Aeromonas_hydrophila_ATCC_7966_chromosome	NC_000913_sraC_ryeA_tpke79_IS091(+)_+_(hom|rev)	0	-	-	-	-	-
Aeromonas_salmonicida_A449	|	Candidate_130_NC_009348	|	ASA_2637		hypothetical protein	*	>>>	1	|	2821309	2821545	>>>	236	|	41	<<<	ASA_2639	hypothetical protein	*	candidate	1049	1.1e-41	Z		1	RNA	Aeromonas_hydrophila_ATCC_7966_chromosome	NC_002505_6S(+)_+_(hom)|NC_000913_6S(+)_+_(hom)	0	-	P34_yes_NC_002516|3'(0)	-	-	-
Aeromonas_salmonicida_A449	|	Candidate_141_NC_009348	|	ASA_2922		SsrA-binding protein	*	>>>	404	|	3146223	3146368	>>>	145	|	112	>>>	ASA_2924	pseudogene	*	candidate	242	4.8e-21	Y		74	RNA	Haemophilus_influenzae_chromosome<>Escherichia_coli_K12_chromosome<>Vibrio_cholerae_chromosome_1<>Escherichia_coli_O157H7_EDL933_chromosome<>Pasteurella_multocida_chromosome<>Escherichia_coli_O157H7_chromosome<>Haemophilus_ducreyi_35000HP_chromosome<>Yersinia_pestis_CO92_chromosome<>Salmonella_typhimurium_LT2_chromosome<>Salmonella_typhi_chromosome<>Buchnera_aphidicola_Sg_chromosome<>Yersinia_pes…	NC_000913_tmRNA(+)_+_(hom)|NC_002505_tmRNA(-)_-_(hom)|NC_003112_tmRNA(-)_-_(hom)|NC_002516_tmRNA(-)_-_(hom)|NC_002745_tmRNA(+)_+_(hom)	1	Candidate_52_NC_009348(tandem)	-	-	-	-
Aeromonas_salmonicida_A449	|	Candidate_158_NC_009348	|	ASA_3322		pseudogene	*	<<<	1	|	3593835	3594028	>>>	193	|	177	<<<	ASA_3323	pseudogene	*	candidate	1501	2.5e-60	X		1	-	Aeromonas_hydrophila_ATCC_7966_chromosome	NC_002505_GEMM(+)_+_(hom|rev)	0	-	-	-	-	-
Aeromonas_salmonicida_A449	|	Candidate_206_NC_009348	|	ASA_4129		GTP binding protein	*	>>>	485	|	4423346	4423512	<<<	166	|	160	<<<	ASA_4131	hypothetical protein	*	candidate	480	4.5e-16	Z		3	RNA	Photobacterium_profundum_SS9_chromosome_1<>Aeromonas_hydrophila_ATCC_7966_chromosome<>Yersinia_enterocolitica_8081_chromosome	NC_002505_Spot_42(+)_+_(hom)|NC_000913_spot42(+)_+_(hom)	1	Candidate_10_NC_009348(tandem),Candidate_207_NC_009348(tandem)	spot42_NC_000913|3'(0)	-	-	-
Agrobacterium_tumefaciens_C58_Cereon	|	Candidate_7_NC_003062	|	AGR_C_167		hypothetical protein	*	<<<	1	|	112334	112521	<<<	187	|	1	<<<	AGR_C_168	hypothetical protein	*	candidate	498	6e-17	Y		1	RNA	Rhizobium_leguminosarum_bv_viciae_3841_chromosome	NC_003047_C7(+)_+_(hom)	0	-	-	5	-	-
Agrobacterium_tumefaciens_C58_Cereon	|	Candidate_16_NC_003062	|	AGR_C_3973		hypothetical protein	*	>>>	137	|	2162991	2163169	>>>	178	|	260	>>>	AGR_C_3976	hypothetical protein	*	candidate	515	1.5e-17	Y		5	-	Sinorhizobium_meliloti_chromosome<>Rhizobium_etli_CFN_42_plasmid_symbiotic_plasmid_p42d<>Rhizobium_etli_CFN_42_chromosome<>Rhizobium_leguminosarum_bv_viciae_3841_chromosome<>Sinorhizobium_medicae_WSM419_chromosome	NC_003047_C15(-)_-_(hom)|NC_003047_C16(-)_-_(hom)	0	Candidate_1_NC_003062(anti),suhB_NC_003062(tandem)	-	-	-	-
Agrobacterium_tumefaciens_C58_Cereon	|	suhB_NC_003062	|	AGR_C_3973		hypothetical protein	*	>>>	421	|	2163275	2163353	>>>	78	|	76	>>>	AGR_C_3976	hypothetical protein	*	suhB	212	6.2e-31	Y		4	-	Sinorhizobium_meliloti_chromosome<>Rhizobium_etli_CFN_42_chromosome<>Rhizobium_leguminosarum_bv_viciae_3841_chromosome<>Sinorhizobium_medicae_WSM419_chromosome	NC_003047_C15(-)_-_(hom)|NC_003047_C16(-)_-_(hom)	1	Candidate_1_NC_003062(opp),Candidate_16_NC_003062(tandem)	-	5	-	-
Agrobacterium_tumefaciens_C58_Cereon	|	Candidate_1_NC_003063	|	AGR_L_3368		hypothetical protein	*	<<<	323	|	1942031	1942217	<<<	186	|	228	<<<	AGR_L_3372	hypothetical protein	*	candidate	510	1.1e-17	Y		2	RNA	Sinorhizobium_meliloti_plasmid_pSymB<>Ochrobactrum_anthropi_ATCC_49188_chromosome_2	NC_003078_B35(+)_+_(hom)	0	-	-	-	-	-
Agrobacterium_tumefaciens_C58_Cereon	|	6S_NC_003063	|	AGR_L_2200		hypothetical protein	*	>>>	1	|	1260678	1260998	>>>	320	|	129	>>>	AGR_L_2203	hypothetical protein	*	6S	477	6.3e-16	T		1	RNA	Rhodopseudomonas_palustris_BisB5_chromosome	NC_003047_C22(-)_-_(hom)	0	-	-	-	-	-
Agrobacterium_tumefaciens_C58_Cereon	|	Cobalamin_NC_003063	|	AGR_L_2851		hypothetical protein	*	>>>	66	|	1633421	1633567	>>>	146	|	230	>>>	AGR_L_2853	hypothetical protein	*	Cobalamin	315	2.8e-18	F		6	RNA	Sinorhizobium_meliloti_plasmid_pSymB<>Rhodospirillum_rubrum_ATCC_11170_chromosome<>Rhizobium_leguminosarum_bv_viciae_3841_chromosome<>Brucella_ovis_chromosome_2<>Sinorhizobium_medicae_WSM419_plasmid_pSMED01<>Ochrobactrum_anthropi_ATCC_49188_chromosome_2	NC_002516_Cobalamin1(-)_-_(hom)|NC_002516_Cobalamin3(-)_-_(hom)|NC_002516_Cobalamin2(+)_+_(hom)	0	-	-	-	-	-
Alkalilimnicola_ehrlichei_MLHE-1	|	Candidate_1_NC_008340	|	Mlg_1909		SsrA-binding protein	*	>>>	156	|	2175533	2175594	<<<	61	|	571	>>>	Mlg_1910	hypothetical protein	*	candidate	237	5.8e-17	F		43	-	Xylella_fastidiosa_chromosome<>Pseudomonas_aeruginosa_chromosome<>Desulfovibrio_vulgaris_Hildenborough_chromosome<>Geobacter_sulfurreducens_chromosome<>Legionella_pneumophila_Philadelphia_1_chromosome<>Coxiella_burnetii_chromosome<>Ralstonia_solanacearum_chromosome<>Shewanella_oneidensis_chromosome<>Xylella_fastidiosa_Temecula1_chromosome<>Nitrosomonas_europaea_chromosome<>Acinetobacter_sp_ADP1_c…	NC_002516_tmRNA(-)_-_(hom|rev)|NC_000913_tmRNA(+)_+_(hom|rev)|NC_002505_tmRNA(-)_-_(hom|rev)|NC_003112_tmRNA(-)_-_(hom|rev)|NC_002745_tmRNA(+)_+_(hom|rev)	1	Candidate_2_NC_008340(opp)	-	-	-	-
Alkalilimnicola_ehrlichei_MLHE-1	|	Candidate_2_NC_008340	|	Mlg_1909		SsrA-binding protein	*	>>>	274	|	2175651	2175835	>>>	184	|	330	>>>	Mlg_1910	hypothetical protein	*	candidate	317	5.8e-17	Z		45	-	Xylella_fastidiosa_chromosome<>Pseudomonas_aeruginosa_chromosome<>Desulfovibrio_vulgaris_Hildenborough_chromosome<>Geobacter_sulfurreducens_chromosome<>Legionella_pneumophila_Philadelphia_1_chromosome<>Coxiella_burnetii_chromosome<>Ralstonia_solanacearum_chromosome<>Shewanella_oneidensis_chromosome<>Xylella_fastidiosa_Temecula1_chromosome<>Nitrosomonas_europaea_chromosome<>Acinetobacter_sp_ADP1_c…	NC_002516_tmRNA(-)_-_(hom)|NC_000913_tmRNA(+)_+_(hom)|NC_002505_tmRNA(-)_-_(hom)|NC_003112_tmRNA(-)_-_(hom)|NC_002745_tmRNA(+)_+_(hom)	1	Candidate_1_NC_008340(opp)	-	-	-	-
Alkaliphilus_metalliredigens_QYMF	|	Candidate_2_NC_009633	|	trRNA		trRNA	*	>>>	19	|	39590	39896	>>>	306	|	194	>>>	Amet_0027	SirA family protein	*	candidate	656	5e-24	T		57	RNA	Bacillus_subtilis_chromosome<>Bacillus_halodurans_chromosome<>Staphylococcus_aureus_N315_chromosome<>Staphylococcus_aureus_Mu50_chromosome<>Staphylococcus_aureus_COL_chromosome<>Staphylococcus_aureus_aureus_MRSA252_chromosome<>Staphylococcus_aureus_aureus_MSSA476_chromosome<>Listeria_monocytogenes_4b_F2365_chromosome<>Staphylococcus_epidermidis_RP62A_chromosome<>Clostridium_acetobutylicum_chromos…	NC_000964_SRP_bact(+)_+_(hom)|NC_002745_SRP_bact(+)_+_(hom)|NC_002516_SRP_bact(+)_+_(hom)|NC_002505_SRP_bact(+)_+_(hom)	0	-	-	-	-	-
Alkaliphilus_metalliredigens_QYMF	|	Candidate_3_NC_009633	|	Amet_0801		hypothetical protein	*	>>>	38	|	841654	841845	>>>	191	|	127	>>>	Amet_0802	hypothetical protein	*	candidate	504	5.6e-17	B		2	-	Clostridium_novyi_NT_chromosome<>Clostridium_kluyveri_DSM_555_chromosome	NC_003210_RFN(-)_-_(hom)|NC_002745_RFN1(-)_-_(hom)|NC_002745_RFN2(-)_-_(hom)|NC_003047_RFN(+)_+_(hom)	1	Candidate_13_NC_009633(para)	RFN1_NC_002745|3'(0)	-	-	-B.subtilis_sigA_2(10.06|-186)
Alkaliphilus_metalliredigens_QYMF	|	Candidate_4_NC_009633	|	Amet_1116		flavodoxin	*	>>>	94	|	1168023	1168364	>>>	341	|	309	>>>	Amet_1117	binding-protein-dependent transport systems	*	candidate	502	4.1e-17	T		1	-	Clostridium_tetani_E88_chromosome	NC_000964_Cobalamin(-)_-_(hom)	0	-	-	-	-	-B.subtilis_sigA_2(12.5|-294)
Alkaliphilus_metalliredigens_QYMF	|	Candidate_5_NC_009633	|	Amet_1116		flavodoxin	*	>>>	94	|	1168023	1168420	>>>	397	|	253	>>>	Amet_1117	binding-protein-dependent transport systems	*	candidate	502	4.1e-17	B		1	-	Clostridium_tetani_E88_chromosome	NC_000964_Cobalamin(-)_-_(hom)	0	-	-	-	-	-B.subtilis_sigA_2(12.5|-350)
Alkaliphilus_metalliredigens_QYMF	|	Candidate_6_NC_009633	|	Amet_1630		hypothetical protein	*	>>>	5	|	1717644	1718019	>>>	375	|	59	>>>	Amet_1631	threonyl-tRNA synthetase	*	candidate	175	5.3e-17	T		1	-	Clostridium_difficile_630_chromosome	NC_003210_T1box2(-)_-_(hom)|NC_000964_T1box4(+)_+_(hom)	0	-	T1box15_NC_000964|3'(0),T1box16_NC_000964|3'(0),T1box17_NC_000964|3'(0),T1box8_NC_002745|3'(0),T1box6_NC_003210|3'(0),T1box12_NC_000964|3'(0)	5	-	-B.subtilis_sigA_2(12.5|-333)
Alkaliphilus_metalliredigens_QYMF	|	Candidate_9_NC_009633	|	Amet_3390		aspartyl-tRNA synthetase	*	<<<	89	|	3450397	3450731	<<<	334	|	65	<<<	Amet_3391	nitrogen regulatory protein P-II	*	candidate	593	3.7e-21	T		12	RNA	Bacillus_cereus_ATCC_10987_chromosome<>Clostridium_tetani_E88_chromosome<>Bacillus_anthracis_str_Sterne_chromosome<>Bacillus_cereus_ZK_chromosome<>Clostridium_perfringens_SM101_chromosome<>Bacillus_thuringiensis_Al_Hakam_chromosome<>Clostridium_difficile_630_chromosome<>Clostridium_botulinum_A_chromosome<>Bacillus_cereus_cytotoxis_NVH_391-98_chromosome<>Clostridium_botulinum_A_ATCC_19397_chromoso…	NC_000964_T1box2(+)_+_(hom)|NC_003210_T1box5(-)_-_(hom)|NC_000964_T1box18(+)_+_(hom)|NC_000964_T1box10(-)_-_(hom)|NC_002745_T1box4(+)_+_(hom)|NC_002745_T1box7(-)_-_(hom)|NC_000964_T1box1(+)_+_(hom)|NC_000964_T1box14(-)_-_(hom)|NC_002745_T1box2(-)_-_(hom)|NC_000964_T1box13(-)_-_(hom)|NC_000964_T1box11(-)_-_(hom)|NC_000964_T1box6(+)_+_(hom)|NC_000964_T1box3(-)_-_(hom)|NC_003210_T1box3(-)_-_(hom)	2	Candidate_12_NC_009633(para),Candidate_17_NC_009633(para)	-	-	RS	-B.subtilis_sigA_2(11.58|-302)
Alkaliphilus_metalliredigens_QYMF	|	Candidate_10_NC_009633	|	Amet_3569		hypothetical protein	*	<<<	283	|	3659834	3660245	<<<	411	|	15	<<<	Amet_3570	SsrA-binding protein	*	candidate	126	7.9e-22	B		15	RNA	Thermoanaerobacter_tengcongensis_chromosome<>Clostridium_tetani_E88_chromosome<>Pelobacter_carbinolicus_chromosome<>Clostridium_perfringens_ATCC_13124_chromosome<>Clostridium_perfringens_SM101_chromosome<>Syntrophomonas_wolfei_Goettingen_chromosome<>Clostridium_novyi_NT_chromosome<>Clostridium_thermocellum_ATCC_27405_chromosome<>Clostridium_difficile_630_chromosome<>Clostridium_botulinum_A_chromo…	NC_003112_tmRNA(-)_-_(hom)|NC_003210_tmRNA(-)_-_(hom)	0	-	-	-	-	-
Alkaliphilus_metalliredigens_QYMF	|	Candidate_12_NC_009633	|	Amet_4660		Aspartate--ammonia ligase	*	<<<	86	|	4787785	4788161	<<<	376	|	10	<<<	Amet_4661	hemerythrin-like metal-binding protein	*	candidate	531	2e-18	T		7	-	Bacillus_cereus_ATCC_10987_chromosome<>Bacillus_anthracis_str_Sterne_chromosome<>Bacillus_cereus_ZK_chromosome<>Clostridium_novyi_NT_chromosome<>Bacillus_thuringiensis_Al_Hakam_chromosome<>Bacillus_cereus_cytotoxis_NVH_391-98_chromosome<>Clostridium_kluyveri_DSM_555_chromosome	NC_003210_T1box5(-)_-_(hom)|NC_000964_T1box4(+)_+_(hom)|NC_002745_T1box3(+)_+_(hom)|NC_003210_T1box4(-)_-_(hom)|NC_003210_T1box9(-)_-_(hom)	1	Candidate_9_NC_009633(para)	-	-	-	-B.subtilis_sigA_2(11.63|-311)
Alkaliphilus_metalliredigens_QYMF	|	Candidate_13_NC_009633	|	Amet_1017		nucleoside recognition domain protein	*	>>>	14	|	1064956	1065216	>>>	260	|	191	>>>	Amet_1018	riboflavin biosynthesis protein RibD	*	candidate	501	7.6e-17	Z		9	RNA	Clostridium_perfringens_chromosome<>Clostridium_perfringens_ATCC_13124_chromosome<>Clostridium_perfringens_SM101_chromosome<>Clostridium_novyi_NT_chromosome<>Clostridium_difficile_630_chromosome<>Clostridium_botulinum_A_chromosome<>Clostridium_botulinum_A_ATCC_19397_chromosome<>Clostridium_botulinum_A_Hall_chromosome<>Clostridium_botulinum_F_Langeland_chromosome	NC_003210_RFN(-)_-_(hom)|NC_000964_RFN2(-)_-_(hom)|NC_002745_RFN1(-)_-_(hom)|NC_002516_RFN(-)_-_(hom)	1	Candidate_3_NC_009633(para)	-	-	-	-
Alkaliphilus_metalliredigens_QYMF	|	Candidate_16_NC_009633	|	Amet_3246		magnesium transporter	*	<<<	121	|	3301176	3301566	<<<	390	|	340	<<<	Amet_3247	Tn554-related, transposase A	*	candidate	470	8.7e-16	Y		2	-	Bacillus_cereus_ATCC14579_chromosome<>Bacillus_cereus_cytotoxis_NVH_391-98_chromosome	NC_003210_ykoK(-)_-_(hom)|NC_000964_ykoK(+)_+_(hom)|NC_002505_ykoK(+)_+_(hom)	0	-	ykoK_NC_000964|3'(0)	-	-	-B.subtilis_sigA_2(12.5|-332)
Alkaliphilus_metalliredigens_QYMF	|	Candidate_17_NC_009633	|	Amet_0023		hypothetical protein	*	<<<	129	|	36089	36473	>>>	384	|	53	>>>	Amet_0024	seryl-tRNA synthetase	*	candidate	509	2.2e-17	X		4	-	Clostridium_botulinum_A_chromosome<>Clostridium_botulinum_A_ATCC_19397_chromosome<>Clostridium_botulinum_A_Hall_chromosome<>Clostridium_botulinum_F_Langeland_chromosome	NC_003210_T1box14(-)_-_(hom)|NC_000964_T1box14(-)_-_(hom)|NC_000964_T1box5(+)_+_(hom)|NC_002745_T1box1(+)_+_(hom)|NC_002745_T1box7(-)_-_(hom)|NC_000964_T1box2(+)_+_(hom)|NC_002745_T1box9(-)_-_(hom)|NC_000964_T1box7(-)_-_(hom)	1	Candidate_9_NC_009633(para)	T1box1_NC_000964|3'(0),T1box14_NC_003210|3'(0),T1box1_NC_002745|3'(0)	5	-	-B.subtilis_sigA_2(9.93|-255)
Anabaena_variabilis_ATCC_29413	|	Candidate_101_NC_007413	|	Ava_1453		hypothetical protein	*	>>>	78	|	1795769	1795890	>>>	121	|	60	>>>	Ava_1454	Esterase/lipase/thioesterase	*	candidate	183	6.3e-16	T		1	RNA	Nostoc_sp_chromosome	NC_000913_IS061_isrA(-)_-_(hom|rev)	15	Candidate_243_NC_007413(para),Candidate_109_NC_007413(para),Candidate_51_NC_007413(para),Candidate_77_NC_007413(para),Candidate_156_NC_007413(para),Candidate_99_NC_007413(para),Candidate_64_NC_007413(para),Candidate_15_NC_007413(para),Candidate_287_NC_007413(para),Candidate_279_NC_007413(para),Candidate_179_NC_007413(para),Candidate_168_NC_007413(para),Candidate_153_NC_007413(para),Candidate_88_N…	-	5	RS	-
Anabaena_variabilis_ATCC_29413	|	Candidate_239_NC_007413	|	Ava_1028		hypothetical protein	*	>>>	324	|	1247312	1247668	>>>	356	|	111	>>>	Ava_1029	Multi-sensor Hybrid Histidine Kinase	*	candidate	1628	3e-86	Y		1	RNA	Nostoc_sp_chromosome	NC_002745_T1box9(-)_-_(hom)	1	Candidate_273_NC_007413(para)	-	-	-	-
Anabaena_variabilis_ATCC_29413	|	Candidate_259_NC_007413	|	Ava_1851a		photosystem I reaction center subunit VIII	*	>>>	24	|	2309598	2309800	>>>	202	|	39	<<<	Ava_1852	photosystem II reaction center protein PsbJ	*	candidate	896	1.2e-34	Y		1	RNA	Nostoc_sp_chromosome	NC_003210_rliB(+)_+_(hom)	1	Candidate_123_NC_007413(anti),Candidate_257_NC_007413(para)	-	-	-	-
Anaeromyxobacter_dehalogenans_2CP-C	|	Candidate_11_NC_007760	|	Adeh_2869		hypothetical protein	*	>>>	9	|	3245188	3245679	>>>	491	|	124	>>>	Adeh_2870	hypothetical protein	*	candidate	1888	1e-79	Z		1	RNA	Anaeromyxobacter_Fw109-5_chromosome	NC_003112_tmRNA(-)_-_(hom)	0	-	-	-	-	-
Arthrobacter_aurescens_TC1	|	Candidate_15_NC_008711	|	AAur_2651		trypsin-like serine protease	*	<<<	135	|	2910976	2911210	<<<	234	|	269	<<<	AAur_2653	SsrA-binding protein	*	candidate	182	7.9e-16	Z		37	RNA	Mycobacterium_tuberculosis_H37Rv_chromosome<>Mycobacterium_leprae_chromosome<>Mycobacterium_tuberculosis_CDC1551_chromosome<>Mycobacterium_avium_paratuberculosis_chromosome<>Mycobacterium_bovis_chromosome<>Streptomyces_avermitilis_chromosome_1_linear<>Corynebacterium_glutamicum_ATCC_13032_Kitasato_chromosome<>Streptomyces_coelicolor_chromosome_1_linear<>Bifidobacterium_longum_chromosome<>Coryneba…	NC_003112_tmRNA(-)_-_(hom)|NC_002505_tmRNA(-)_-_(hom)|NC_002516_tmRNA(-)_-_(hom)	0	Candidate_16_NC_008711(anti)	-	-	-	-
Arthrobacter_aurescens_TC1	|	Candidate_23_NC_008711	|	AAur_3867		putative ATP dependent DNA ligase	*	<<<	288	|	4242537	4242644	<<<	107	|	14	>>>	AAur_3868	hypothetical protein	*	candidate	218	9.7e-18	F		1	-	Arthrobacter_FB24_chromosome_1	NC_000964_ydaO1yuaA1(+)_+_(hom|rev)|NC_000964_ydaO1yuaA2(+)_+_(hom|rev)	0	-	-	-	-	-
Arthrobacter_FB24	|	Candidate_1_NC_008541	|	Arth_2439		hypothetical protein	*	>>>	288	|	2736124	2736214	>>>	90	|	238	>>>	Arth_2440	band 7 protein	*	candidate	397	4.6e-22	R		88	RNA	Mycobacterium_tuberculosis_H37Rv_chromosome<>Deinococcus_radiodurans_chromosome_1<>Vibrio_cholerae_chromosome_1<>Mycobacterium_leprae_chromosome<>Mycobacterium_tuberculosis_CDC1551_chromosome<>Geobacter_sulfurreducens_chromosome<>Mycobacterium_bovis_chromosome<>Yersinia_pestis_CO92_chromosome<>Streptomyces_avermitilis_chromosome_1_linear<>Salmonella_typhi_chromosome<>Thermoanaerobacter_tengcongen…	NC_002505_rnpB(-)_-_(hom|rev)|NC_000913_rnpB(-)_-_(hom|rev)|NC_003047_RNaseP_bact_a(-)_-_(hom|rev)|NC_003112_RNaseP_bact_a(-)_-_(hom|rev)|NC_002516_P28_yes(+)_+_(hom)	1	Candidate_13_NC_008541(tandem)	-	-	-	-
Arthrobacter_FB24	|	Candidate_10_NC_008541	|	Arth_1673		Ribulose-phosphate 3-epimerase	*	>>>	77	|	1868911	1869136	<<<	225	|	69	>>>	Arth_1674	riboflavin biosynthesis protein RibD	*	candidate	862	3.3e-33	F		1	RNA	Arthrobacter_aurescens_TC1_chromosome	NC_002745_RFN2(-)_-_(hom|rev)|NC_000964_RFN2(-)_-_(hom|rev)	0	-	-	-	-	-
Arthrobacter_FB24	|	Candidate_13_NC_008541	|	Arth_2439		hypothetical protein	*	>>>	372	|	2736208	2736398	>>>	190	|	54	>>>	Arth_2440	band 7 protein	*	candidate	326	4.5e-23	Y		57	-	Deinococcus_radiodurans_chromosome_1<>Mycobacterium_leprae_chromosome<>Yersinia_pestis_CO92_chromosome<>Thermoanaerobacter_tengcongensis_chromosome<>Yersinia_pestis_KIM_chromosome<>Erwinia_carotovora_atroseptica_SCRI1043_chromosome<>Xylella_fastidiosa_Temecula1_chromosome<>Tropheryma_whipplei_Twist_chromosome<>Pirellula_sp_chromosome<>Gloeobacter_violaceus_chromosome<>Thermus_thermophilus_HB27_ch…	NC_002505_rnpB(-)_-_(hom|rev)|NC_000913_rnpB(-)_-_(hom|rev)|NC_003047_RNaseP_bact_a(-)_-_(hom|rev)|NC_003112_RNaseP_bact_a(-)_-_(hom|rev)|NC_002516_P28_yes(+)_+_(hom)|NC_005072_RNaseP_bact_a(+)_+_(hom|rev)	1	Candidate_1_NC_008541(tandem)	-	5	-	-
Arthrobacter_FB24	|	Candidate_17_NC_008541	|	Arth_2661		hypothetical protein	*	>>>	262	|	2985067	2985368	<<<	301	|	268	<<<	Arth_2662	SsrA-binding protein	*	candidate	493	8.1e-30	Z		21	RNA	Mycobacterium_tuberculosis_H37Rv_chromosome<>Mycobacterium_tuberculosis_CDC1551_chromosome<>Mycobacterium_bovis_chromosome<>Streptomyces_avermitilis_chromosome_1_linear<>Streptomyces_coelicolor_chromosome_1_linear<>Propionibacterium_acnes_KPA171202_chromosome<>Leifsonia_xyli_xyli_CTCB0_chromosome<>Rhodococcus_RHA1_chromosome<>Mycobacterium_avium_104_chromosome<>Mycobacterium_smegmatis_MC2_155_chr…	NC_003112_tmRNA(-)_-_(hom)|NC_002505_tmRNA(-)_-_(hom)	0	Candidate_18_NC_008541(anti)	-	-	-	-
Aster_yellows_witches-broom_phytoplasma_AYWB	|	Candidate_1_NC_007716	|	AYWB_073		hypothetical protein	*	>>>	493	|	86721	87123	>>>	402	|	30	>>>	AYWB_074	thymidylate kinase	*	candidate	705	8.1e-26	T		1	RNA	Onion_yellows_phytoplasma_chromosome	NC_002745_yybP1ykoY(+)_+_(hom|rev)	1	Candidate_4_NC_007716(para)	-	5	RS	-B.subtilis_sigA_1(9.31|-114)
Aster_yellows_witches-broom_phytoplasma_AYWB	|	Candidate_3_NC_007716	|	AYWB_180		hypothetical protein	*	<<<	24	|	203086	203227	<<<	141	|	0	<<<	AYWB_181	thymidylate kinase	*	candidate	594	8.4e-21	T		1	-	Onion_yellows_phytoplasma_chromosome	NC_005072_yfr2(+)_+_(hom)	5	Candidate_2_NC_007716(para),Candidate_7_NC_007716(para),Candidate_5_NC_007716(para),Candidate_6_NC_007716(para),Candidate_4_NC_007716(para)	-	5	-	-B.subtilis_sigA_2(10.94|-236)
Aster_yellows_witches-broom_phytoplasma_AYWB	|	Candidate_5_NC_007716	|	AYWB_221		hypothetical protein	*	<<<	22	|	234122	234274	<<<	152	|	0	<<<	AYWB_222	thymidylate kinase	*	candidate	517	1.1e-17	T		1	RNA	Onion_yellows_phytoplasma_chromosome	NC_005072_yfr4(+)_+_(hom)	4	Candidate_3_NC_007716(para),Candidate_7_NC_007716(para),Candidate_2_NC_007716(para),Candidate_4_NC_007716(para)	-	5	RS	-
Azoarcus_BH72	|	Candidate_4_NC_008702	|	azo1116		hypothetical protein	*	<<<	96	|	1204052	1204376	<<<	324	|	142	<<<	azo1117	AceA protein	*	candidate	518	8.3e-18	F		1	RNA	Dechloromonas_aromatica_RCB_chromosome	NC_003112_gcvT1(+)_+_(hom)|NC_002505_gcvT1(-)_-_(hom)	0	-	-	-	-	-E.coli_sig70_2(7.28|-274)
Azoarcus_BH72	|	Candidate_6_NC_008702	|	azo2395		Phenylacetate--CoA ligase	*	>>>	160	|	2635201	2635387	<<<	186	|	139	>>>	azo2396	putative TonB-dependent receptor	*	candidate	523	4.4e-18	F		10	RNA	Rhodopseudomonas_palustris_CGA009_chromosome<>Burkholderia_383_chromosome_2<>Rhodospirillum_rubrum_ATCC_11170_chromosome<>Rhodopseudomonas_palustris_HaA2_chromosome<>Methylobacillus_flagellatus_KT_chromosome<>Burkholderia_cenocepacia_AU_1054_chromosome_2<>Burkholderia_cepacia_AMMD_chromosome_2<>Burkholderia_cenocepacia_HI2424_chromosome_2<>Burkholderia_vietnamiensis_G4_chromosome_2<>Sphingomonas_…	NC_002516_Cobalamin2(+)_+_(hom|rev)|NC_002516_Cobalamin3(-)_-_(hom|rev)|NC_003047_Cobalamin1(+)_+_(hom|rev)|NC_002516_Cobalamin1(-)_-_(hom|rev)	0	-	-	-	-	-
Bacillus_amyloliquefaciens_FZB42	|	Candidate_3_NC_009725	|	RBAM_011920		YcjH	*	<<<	67	|	1161404	1161673	>>>	269	|	32	>>>	RBAM_011930	YjcI	*	candidate	482	5.8e-16	R		3	RNA	Bacillus_subtilis_chromosome<>Bacillus_licheniformis_ATCC_14580_chromosome<>Bacillus_licheniformis_DSM_13_chromosome	NC_000964_S_box2(+)_+_(hom)|NC_000964_S_box1(-)_-_(hom)|NC_003210_S_box2(-)_-_(hom)|NC_003210_S_box3(-)_-_(hom)|NC_000964_S_box7(-)_-_(hom)|NC_002745_S_box3(-)_-_(hom)	5	Candidate_33_NC_009725(para),Candidate_120_NC_009725(para),Candidate_15_NC_009725(para),Candidate_109_NC_009725(para),Candidate_41_NC_009725(para)	S_box2_NC_000964|UD(5'(0-0)|3'(1-1)),T1box2_NC_002745|3'(0)	5	RS	-
Bacillus_amyloliquefaciens_FZB42	|	Candidate_8_NC_009725	|	RBAM_020260		Xpt	*	<<<	22	|	2130000	2130303	>>>	303	|	5	<<<	RBAM_020270	YpwA	*	candidate	743	7.7e-28	R		1	RNA	Bacillus_subtilis_chromosome	NC_000964_Purine4(-)_-_(hom|rev)|NC_002745_Purine(+)_+_(hom|rev)|NC_000964_Purine3(+)_+_(hom|rev)	2	Candidate_48_NC_009725(anti),Candidate_29_NC_009725(para),Candidate_133_NC_009725(para)	-	-	-	-B.subtilis_sigG_3(9.3|-110)
Bacillus_amyloliquefaciens_FZB42	|	Candidate_15_NC_009725	|	RBAM_018760		YoaD	*	<<<	41	|	2001627	2001946	<<<	319	|	0	>>>	RBAM_018770	YoaE	*	candidate	868	1.8e-33	R		1	RNA	Bacillus_subtilis_chromosome	NC_000964_S_box7(-)_-_(hom)|NC_002745_S_box4(-)_-_(hom)|NC_000964_S_box2(+)_+_(hom)|NC_003210_S_box3(-)_-_(hom)|NC_002745_S_box3(-)_-_(hom)|NC_003210_S_box6(-)_-_(hom)|NC_000964_S_box10(+)_+_(hom)|NC_003210_S_box2(-)_-_(hom)|NC_000964_S_box1(-)_-_(hom)	4	Candidate_3_NC_009725(para),Candidate_120_NC_009725(para),Candidate_33_NC_009725(para),Candidate_109_NC_009725(para)	S_box7_NC_000964|UD(5'(1-1)|3'(0-0))	-	RS	-B.subtilis_sigA_2(10.93|-215)
Bacillus_amyloliquefaciens_FZB42	|	Candidate_17_NC_009725	|	RBAM_012890		YkkB	*	>>>	71	|	1253558	1253657	<<<	99	|	16	>>>	RBAM_012900	YkkC	*	candidate	573	5.5e-20	R		1	RNA	Bacillus_subtilis_chromosome	NC_000964_ykkC1yxkD1(+)_+_(hom|rev)|NC_000964_ykkC1yxkD2(-)_-_(hom|rev)	1	Candidate_37_NC_009725(anti),Candidate_119_NC_009725(para)	-	-	-	-
Bacillus_amyloliquefaciens_FZB42	|	Candidate_21_NC_009725	|	RBAM_001170		GltX	*	>>>	3	|	113228	113486	>>>	258	|	48	>>>	RBAM_001180	CysE	*	candidate	708	3.2e-26	T		3	RNA	Bacillus_subtilis_chromosome<>Bacillus_licheniformis_ATCC_14580_chromosome<>Bacillus_licheniformis_DSM_13_chromosome	NC_003210_T1box2(-)_-_(hom)	0	Candidate_66_NC_009725(anti)	-	5	-	-
Bacillus_amyloliquefaciens_FZB42	|	Candidate_29_NC_009725	|	RBAM_006830		YebG	*	>>>	1	|	660263	660538	>>>	275	|	35	>>>	RBAM_006840	PurE	*	candidate	1050	1.1e-41	T		3	COD	Bacillus_subtilis_chromosome<>Bacillus_licheniformis_ATCC_14580_chromosome<>Bacillus_licheniformis_DSM_13_chromosome	NC_000964_Purine3(+)_+_(hom)|NC_000964_Purine2(+)_+_(hom)|NC_000964_Purine4(-)_-_(hom)|NC_002745_Purine(+)_+_(hom)	3	Candidate_133_NC_009725(para),Candidate_8_NC_009725(para),Candidate_48_NC_009725(para)	Purine3_NC_000964|UD(5'(0-0)|3'(1-1))	5	-	-B.subtilis_sigA_2(10.07|-201)
Bacillus_amyloliquefaciens_FZB42	|	Candidate_33_NC_009725	|	RBAM_011020		YitJ	*	<<<	44	|	1081933	1082199	<<<	266	|	0	<<<	RBAM_011030	Yitk	*	candidate	1070	1.4e-42	T		1	RNA	Bacillus_subtilis_chromosome	NC_000964_S_box1(-)_-_(hom)|NC_000964_S_box2(+)_+_(hom)|NC_003210_S_box2(-)_-_(hom)|NC_002745_S_box1(+)_+_(hom)|NC_003210_S_box6(-)_-_(hom)|NC_000964_S_box10(+)_+_(hom)|NC_002745_S_box4(-)_-_(hom)|NC_003210_S_box3(-)_-_(hom)|NC_000964_S_box7(-)_-_(hom)|NC_000964_S_box11(+)_+_(hom)|NC_000964_S_box6(+)_+_(hom)|NC_003210_S_box1(+)_+_(hom)	6	Candidate_3_NC_009725(para),Candidate_15_NC_009725(para),Candidate_120_NC_009725(para),Candidate_45_NC_009725(para),Candidate_79_NC_009725(para),Candidate_41_NC_009725(para)	S_box1_NC_000964|UD(5'(1-1)|3'(0-0))	-	RS	-
Bacillus_amyloliquefaciens_FZB42	|	Candidate_34_NC_009725	|	RBAM_011650		YjbQ	*	>>>	1	|	1142846	1143069	>>>	223	|	21	>>>	RBAM_011660	TenA	*	candidate	573	4.9e-20	T		3	RNA	Bacillus_subtilis_chromosome<>Bacillus_licheniformis_ATCC_14580_chromosome<>Bacillus_licheniformis_DSM_13_chromosome	NC_000964_THI2(+)_+_(hom)|NC_002745_THI2(-)_-_(hom)	0	-	THI2_NC_000964|UD(5'(0-0)|3'(1-1))	5	-	-
Bacillus_amyloliquefaciens_FZB42	|	Candidate_37_NC_009725	|	RBAM_012890		YkkB	*	>>>	1	|	1253488	1253642	>>>	154	|	31	>>>	RBAM_012900	YkkC	*	candidate	573	5.5e-20	T		1	RNA	Bacillus_subtilis_chromosome	NC_000964_ykkC1yxkD1(+)_+_(hom)|NC_000964_ykkC1yxkD2(-)_-_(hom)	1	Candidate_17_NC_009725(anti),Candidate_119_NC_009725(para)	ykkC1yxkD1_NC_000964|UD(5'(0-0)|3'(0-0))	5	RS	-
Bacillus_amyloliquefaciens_FZB42	|	Candidate_38_NC_009725	|	RBAM_012920		YkkE	*	>>>	46	|	1255350	1255627	>>>	277	|	45	>>>	RBAM_012930	ProB	*	candidate	828	1.1e-31	T		3	RNA	Bacillus_subtilis_chromosome<>Bacillus_licheniformis_ATCC_14580_chromosome<>Bacillus_licheniformis_DSM_13_chromosome	NC_000964_T1box4(+)_+_(hom)|NC_000964_T1box3(-)_-_(hom)|NC_002745_T1box3(+)_+_(hom)|NC_003210_T1box5(-)_-_(hom)	0	-	T1box4_NC_000964|UD(5'(0-0)|3'(0-0))	5	-	-B.subtilis_sigA_2(9.07|-247)
Bacillus_amyloliquefaciens_FZB42	|	Candidate_39_NC_009725	|	RBAM_013040		MetE	*	<<<	29	|	1267621	1267721	<<<	100	|	247	<<<	RBAM_013050	IspA	*	candidate	327	1.1e-27	B		4	RNA	Bacillus_subtilis_chromosome<>Bacillus_licheniformis_ATCC_14580_chromosome<>Bacillus_licheniformis_DSM_13_chromosome<>Bacillus_cereus_cytotoxis_NVH_391-98_chromosome	NC_000964_S_box3(-)_-_(hom)|NC_000964_S_box4(-)_-_(hom)|NC_000964_S_box9(-)_-_(hom)	3	Candidate_4_NC_009725(anti),Candidate_70_NC_009725(para),Candidate_41_NC_009725(para),Candidate_109_NC_009725(para)	S_box3_NC_000964|UD(5'(0-0)|3'(0-0)),S_box6_NC_003210|3'(0)	5	RS	-
Bacillus_amyloliquefaciens_FZB42	|	Candidate_40_NC_009725	|	RBAM_013110		YkzD	*	>>>	61	|	1274977	1275236	>>>	259	|	185	>>>	RBAM_013120	YkoK	*	candidate	1017	1.9e-40	T		15	RNA	Bacillus_subtilis_chromosome<>Bacillus_halodurans_chromosome<>Bacillus_cereus_ATCC_10987_chromosome<>Bacillus_anthracis_Ames_chromosome<>Bacillus_cereus_ATCC14579_chromosome<>Bacillus_anthracis_str_Sterne_chromosome<>Bacillus_thuringiensis_konkukian_chromosome<>Bacillus_licheniformis_ATCC_14580_chromosome<>Bacillus_cereus_ZK_chromosome<>Bacillus_licheniformis_DSM_13_chromosome<>Bacillus_clausii_K…	NC_000964_ykoK(+)_+_(hom)|NC_003210_ykoK(-)_-_(hom)|NC_002505_ykoK(+)_+_(hom)	0	-	ykoK_NC_000964|3'(0)	-	-	-
Bacillus_amyloliquefaciens_FZB42	|	Candidate_41_NC_009725	|	RBAM_013360		MtnE	*	>>>	1	|	1299742	1299924	>>>	182	|	6	>>>	RBAM_013370	MtnW	*	candidate	677	1.2e-24	T		3	-	Bacillus_subtilis_chromosome<>Bacillus_licheniformis_ATCC_14580_chromosome<>Bacillus_licheniformis_DSM_13_chromosome	NC_000964_S_box5(+)_+_(hom)|NC_000964_S_box11(+)_+_(hom)|NC_000964_S_box6(+)_+_(hom)|NC_003210_S_box3(-)_-_(hom)|NC_003210_S_box2(-)_-_(hom)|NC_000964_S_box9(-)_-_(hom)|NC_000964_S_box10(+)_+_(hom)|NC_002745_S_box2(+)_+_(hom)|NC_002745_S_box1(+)_+_(hom)|NC_003210_S_box1(+)_+_(hom)	9	Candidate_45_NC_009725(para),Candidate_79_NC_009725(para),Candidate_120_NC_009725(para),Candidate_4_NC_009725(para),Candidate_39_NC_009725(para),Candidate_109_NC_009725(para),Candidate_70_NC_009725(para),Candidate_3_NC_009725(para),Candidate_33_NC_009725(para)	S_box5_NC_000964|UD(5'(0-0)|3'(1-1))	5	-	-
Bacillus_amyloliquefaciens_FZB42	|	Candidate_44_NC_009725	|	RBAM_015250		DivIVA	*	>>>	12	|	1527785	1528020	>>>	235	|	94	>>>	RBAM_015260	IleS	*	candidate	994	3.4e-39	T		3	RNA	Bacillus_subtilis_chromosome<>Bacillus_licheniformis_ATCC_14580_chromosome<>Bacillus_licheniformis_DSM_13_chromosome	NC_000964_T1box5(+)_+_(hom)|NC_000964_T1box10(-)_-_(hom)|NC_003210_T1box1(+)_+_(hom)|NC_003210_T1box5(-)_-_(hom)|NC_000964_T1box2(+)_+_(hom)	3	Candidate_85_NC_009725(para),Candidate_104_NC_009725(para),Candidate_99_NC_009725(para)	T1box5_NC_000964|UD(5'(0-0)|3'(1-1)),T1box4_NC_002745|3'(0)	-	RS	-B.subtilis_sigA_3(12.5|-204)
Bacillus_amyloliquefaciens_FZB42	|	Candidate_48_NC_009725	|	RBAM_020260		Xpt	*	<<<	27	|	2130005	2130269	<<<	264	|	39	<<<	RBAM_020270	YpwA	*	candidate	743	7.7e-28	T		1	RNA	Bacillus_subtilis_chromosome	NC_000964_Purine4(-)_-_(hom)|NC_002745_Purine(+)_+_(hom)|NC_000964_Purine3(+)_+_(hom)	2	Candidate_8_NC_009725(anti),Candidate_29_NC_009725(para),Candidate_133_NC_009725(para)	Purine4_NC_000964|UD(5'(1-1)|3'(0-0)),Purine2_NC_003210|UD(5'(1-1)|3'(0-0)),Purine_NC_002745|3'(0)	5	RS	-Multi_s54(10.22|-117)
Bacillus_amyloliquefaciens_FZB42	|	Candidate_51_NC_009725	|	RBAM_021200		YpaA	*	<<<	62	|	2216120	2216225	<<<	105	|	0	<<<	RBAM_021210	YpzE	*	candidate	479	4e-16	T		2	RNA	Bacillus_licheniformis_ATCC_14580_chromosome<>Bacillus_licheniformis_DSM_13_chromosome	NC_002745_RFN1(-)_-_(hom)	0	-	RFN1_NC_000964|UD(5'(1-1)|3'(0-0)),RFN_NC_003210|3'(0)	-	-	-
Bacillus_amyloliquefaciens_FZB42	|	Candidate_52_NC_009725	|	RBAM_023570		GlyQ	*	<<<	48	|	2478194	2478431	<<<	237	|	15	<<<	RBAM_023580	RecO	*	candidate	721	7.6e-27	T		3	RNA	Bacillus_subtilis_chromosome<>Bacillus_licheniformis_ATCC_14580_chromosome<>Bacillus_licheniformis_DSM_13_chromosome	NC_000964_T1box7(-)_-_(hom)|NC_003210_T1box2(-)_-_(hom)|NC_000964_T1box8(-)_-_(hom)|NC_000964_T1box9(-)_-_(hom)	2	Candidate_95_NC_009725(anti),Candidate_57_NC_009725(para),Candidate_59_NC_009725(para)	T1box7_NC_000964|UD(5'(1-1)|3'(0-0)),T1box2_NC_003210|UD(5'(1-1)|3'(0-0))	-	RS	-B.subtilis_sigA_2(10.93|-228)
Bacillus_amyloliquefaciens_FZB42	|	Candidate_53_NC_009725	|	RBAM_023760		DnaJ	*	<<<	87	|	2495523	2495588	<<<	65	|	32	<<<	RBAM_023770	DnaK	*	candidate	497	1.8e-16	T		2	RNA	Bacillus_subtilis_chromosome<>Bacillus_licheniformis_DSM_13_chromosome	NC_000964_SurC(+)_+_(hom|rev)	0	-	-	-	-	-
Bacillus_amyloliquefaciens_FZB42	|	Candidate_57_NC_009725	|	RBAM_024510		AlaS	*	<<<	45	|	2571446	2571729	<<<	283	|	2	<<<	RBAM_024520	YrrI	*	candidate	1194	3.3e-48	T		3	RNA	Bacillus_subtilis_chromosome<>Bacillus_licheniformis_ATCC_14580_chromosome<>Bacillus_licheniformis_DSM_13_chromosome	NC_000964_T1box8(-)_-_(hom)|NC_000964_T1box7(-)_-_(hom)|NC_000964_T1box6(+)_+_(hom)|NC_003210_T1box1(+)_+_(hom)|NC_003210_T1box10(-)_-_(hom)|NC_000964_T1box1(+)_+_(hom)|NC_000964_T1box14(-)_-_(hom)|NC_000964_T1box13(-)_-_(hom)|NC_000964_T1box5(+)_+_(hom)|NC_003210_T1box3(-)_-_(hom)|NC_000964_T1box10(-)_-_(hom)	2	Candidate_52_NC_009725(para),Candidate_95_NC_009725(para)	T1box8_NC_000964|UD(5'(1-1)|3'(0-0)),T1box3_NC_003210|3'(0),T1box7_NC_002745|3'(0)	-	RS	-B.subtilis_sigA_2(12.5|-261)
Bacillus_amyloliquefaciens_FZB42	|	Candidate_59_NC_009725	|	RBAM_024670		HisS	*	<<<	33	|	2588544	2588804	<<<	260	|	62	<<<	RBAM_024680	YrzK	*	candidate	479	6e-16	T		4	RNA	Bacillus_subtilis_chromosome<>Bacillus_licheniformis_ATCC_14580_chromosome<>Bacillus_licheniformis_DSM_13_chromosome<>Bacillus_cereus_cytotoxis_NVH_391-98_chromosome	NC_000964_T1box9(-)_-_(hom)|NC_000964_T1box9(-)_-_(hom|rev)|NC_003210_T1box14(-)_-_(hom)|NC_000964_T1box7(-)_-_(hom)|NC_003210_T1box12(+)_+_(hom)	2	Candidate_52_NC_009725(para),Candidate_95_NC_009725(para)	T1box9_NC_000964|UD(5'(1-1)|3'(0-0)),T1box4_NC_003210|UD(5'(1-1)|3'(0-0)),sroE_NC_000913|3'(0)	-	RS	-B.subtilis_sigA_2(10.32|-298)
Bacillus_amyloliquefaciens_FZB42	|	Candidate_60_NC_009725	|	RBAM_025370		IlvB	*	<<<	2	|	2661587	2661891	<<<	304	|	415	<<<	RBAM_025380	hypothetical protein	*	candidate	259	9.9e-26	T		2	-	Bacillus_licheniformis_ATCC_14580_chromosome<>Bacillus_licheniformis_DSM_13_chromosome	NC_000964_T1box11(-)_-_(hom)|NC_000964_T1box14(-)_-_(hom)	0	-	T1box11_NC_000964|3'(0)	5	-	-B.subtilis_sigA_2(9.46|-406)
Bacillus_amyloliquefaciens_FZB42	|	Candidate_61_NC_009725	|	RBAM_025540		LysC	*	<<<	64	|	2674233	2674344	<<<	111	|	190	<<<	RBAM_025550	UvrC	*	candidate	719	1.8e-26	B		3	RNA	Bacillus_subtilis_chromosome<>Bacillus_licheniformis_ATCC_14580_chromosome<>Bacillus_licheniformis_DSM_13_chromosome	NC_000964_Lysine1(-)_-_(hom)	0	Candidate_11_NC_009725(anti),Candidate_98_NC_009725(anti)	Lysine1_NC_000964|UD(5'(1-1)|3'(0-0)),Lysine1_NC_002745|3'(0)	-	-	-
Bacillus_amyloliquefaciens_FZB42	|	Candidate_70_NC_009725	|	RBAM_013340		MtnK	*	<<<	58	|	1297375	1297472	<<<	97	|	200	<<<	RBAM_013350	YkrU	*	candidate	269	3.9e-28	Z		3	RNA	Bacillus_subtilis_chromosome<>Bacillus_licheniformis_ATCC_14580_chromosome<>Bacillus_licheniformis_DSM_13_chromosome	NC_000964_S_box4(-)_-_(hom)|NC_000964_S_box3(-)_-_(hom)|NC_000964_S_box5(+)_+_(hom)	3	Candidate_4_NC_009725(para),Candidate_39_NC_009725(para),Candidate_41_NC_009725(para)	S_box4_NC_000964|UD(5'(1-1)|3'(0-0))	-	RS	-
Bacillus_amyloliquefaciens_FZB42	|	Candidate_71_NC_009725	|	RBAM_013610		StoA	*	>>>	-3	|	1321377	1321619	<<<	242	|	2	>>>	RBAM_013620	YkvW	*	candidate	686	4.1e-25	X		1	-	Bacillus_subtilis_chromosome	NC_000964_S_box10(+)_+_(hom|rev)	0	Candidate_72_NC_009725(anti)	-	-	-	-Multi_Fur(17.05|-66)
Bacillus_amyloliquefaciens_FZB42	|	Candidate_77_NC_009725	|	RBAM_015250		DivIVA	*	>>>	12	|	1527785	1528083	>>>	298	|	31	>>>	RBAM_015260	IleS	*	candidate	994	3.4e-39	Y		3	RNA	Bacillus_subtilis_chromosome<>Bacillus_licheniformis_ATCC_14580_chromosome<>Bacillus_licheniformis_DSM_13_chromosome	NC_000964_T1box5(+)_+_(hom)|NC_000964_T1box10(-)_-_(hom)|NC_003210_T1box1(+)_+_(hom)|NC_003210_T1box5(-)_-_(hom)|NC_000964_T1box1(+)_+_(hom)|NC_000964_T1box13(-)_-_(hom)|NC_000964_T1box18(+)_+_(hom)|NC_003210_T1box3(-)_-_(hom)|NC_002745_T1box7(-)_-_(hom)|NC_000964_T1box3(-)_-_(hom)|NC_002745_T1box1(+)_+_(hom)|NC_000964_T1box2(+)_+_(hom)|NC_003210_T1box10(-)_-_(hom)	4	Candidate_85_NC_009725(para),Candidate_105_NC_009725(para),Candidate_104_NC_009725(para),Candidate_99_NC_009725(para)	T1box5_NC_000964|UD(5'(0-0)|3'(1-1)),T1box4_NC_002745|3'(0)	5	RS	-B.subtilis_sigA_3(12.5|-267)
Bacillus_amyloliquefaciens_FZB42	|	Candidate_79_NC_009725	|	RBAM_015390		PyrE	*	>>>	6	|	1544719	1544969	<<<	250	|	75	>>>	RBAM_015400	CysH	*	candidate	627	1.3e-22	X		3	-	Bacillus_subtilis_chromosome<>Bacillus_licheniformis_ATCC_14580_chromosome<>Bacillus_licheniformis_DSM_13_chromosome	NC_000964_S_box6(+)_+_(hom|rev)|NC_000964_S_box11(+)_+_(hom|rev)|NC_002745_S_box2(+)_+_(hom|rev)|NC_000964_S_box5(+)_+_(hom|rev)|NC_000964_S_box10(+)_+_(hom|rev)|NC_003210_S_box2(-)_-_(hom|rev)|NC_003210_S_box6(-)_-_(hom|rev)|NC_000964_S_box9(-)_-_(hom|rev)|NC_000964_S_box1(-)_-_(hom|rev)	4	Candidate_45_NC_009725(anti),Candidate_41_NC_009725(para),Candidate_120_NC_009725(para),Candidate_109_NC_009725(para),Candidate_33_NC_009725(para)	-	-	-	-
Bacillus_amyloliquefaciens_FZB42	|	Candidate_80_NC_009725	|	RBAM_016420		PolC	*	>>>	42	|	1646542	1646617	>>>	75	|	121	>>>	RBAM_016430	YlxS	*	candidate	643	5.1e-23	Z		3	RNA	Bacillus_subtilis_chromosome<>Bacillus_licheniformis_ATCC_14580_chromosome<>Bacillus_licheniformis_DSM_13_chromosome	NC_000964_polC-ylxS(+)_+_(hom)	0	-	polC-ylxS_NC_000964|UD(5'(0-0)|3'(1-1))	-	-	-
Bacillus_amyloliquefaciens_FZB42	|	Candidate_81_NC_009725	|	RBAM_016420		PolC	*	>>>	42	|	1646542	1646692	>>>	150	|	46	>>>	RBAM_016430	YlxS	*	candidate	643	5.1e-23	Z		3	RNA	Bacillus_subtilis_chromosome<>Bacillus_licheniformis_ATCC_14580_chromosome<>Bacillus_licheniformis_DSM_13_chromosome	NC_000964_polC-ylxS(+)_+_(hom)	0	-	polC-ylxS_NC_000964|UD(5'(0-0)|3'(1-1))	5	-	-
Bacillus_amyloliquefaciens_FZB42	|	Candidate_85_NC_009725	|	RBAM_000150		PdxT	*	>>>	1	|	20343	20628	>>>	285	|	32	>>>	RBAM_000160	SerS	*	candidate	1003	1.4e-39	Z		3	RNA	Bacillus_subtilis_chromosome<>Bacillus_licheniformis_ATCC_14580_chromosome<>Bacillus_licheniformis_DSM_13_chromosome	NC_000964_T1box1(+)_+_(hom)|NC_000964_T1box5(+)_+_(hom)|NC_000964_T1box18(+)_+_(hom)|NC_003210_T1box1(+)_+_(hom)|NC_002745_T1box1(+)_+_(hom)|NC_000964_T1box14(-)_-_(hom)|NC_002745_T1box8(-)_-_(hom)|NC_002745_T1box7(-)_-_(hom)|NC_000964_T1box13(-)_-_(hom)|NC_003210_T1box14(-)_-_(hom)|NC_002745_T1box4(+)_+_(hom)|NC_000964_T1box8(-)_-_(hom)|NC_000964_T1box17(-)_-_(hom)|NC_000964_T1box7(-)_-_(hom)	2	Candidate_105_NC_009725(para),Candidate_44_NC_009725(para)	T1box1_NC_000964|UD(5'(0-0)|3'(1-1)),T1box14_NC_003210|3'(0),T1box1_NC_002745|3'(0)	5	RS	-
Bacillus_amyloliquefaciens_FZB42	|	Candidate_89_NC_009725	|	RBAM_020320		YpsC	*	<<<	40	|	2136508	2136910	<<<	402	|	90	<<<	RBAM_020330	YpsB	*	candidate	562	7e-20	Z		39	-	Bacillus_subtilis_chromosome<>Bacillus_halodurans_chromosome<>Staphylococcus_aureus_COL_chromosome<>Staphylococcus_aureus_aureus_MRSA252_chromosome<>Staphylococcus_aureus_aureus_MSSA476_chromosome<>Staphylococcus_epidermidis_RP62A_chromosome<>Streptococcus_pneumoniae_TIGR4_chromosome<>Streptococcus_pneumoniae_R6_chromosome<>Listeria_monocytogenes_chromosome<>Bacillus_cereus_ATCC_10987_chromosome<…	NC_000964_RNaseP_bact_b(-)_-_(hom)|NC_003210_RNaseP_bact_b(-)_-_(hom)|NC_002745_RNaseP_bact_b(-)_-_(hom)	0	-	RNaseP_bact_b_NC_000964|UD(5'(0-0)|3'(0-0)),RNaseP_bact_b_NC_003210|UD(5'(0-0)|3'(0-0)),RNaseP_bact_b_NC_002745|UD(5'(0-0)|3'(0-1))	-	-	-B.subtilis_sigA_2(11.54|-453)
Bacillus_amyloliquefaciens_FZB42	|	Candidate_93_NC_009725	|	RBAM_021420		RibD	*	<<<	35	|	2236084	2236366	<<<	282	|	79	<<<	RBAM_021430	YpuD	*	candidate	824	1.6e-31	Y		2	-	Bacillus_licheniformis_ATCC_14580_chromosome<>Bacillus_licheniformis_DSM_13_chromosome	NC_000964_RFN2(-)_-_(hom)|NC_000913_SroG(-)_-_(hom)|NC_002745_RFN2(-)_-_(hom)|NC_002745_RFN1(-)_-_(hom)|NC_002516_RFN(-)_-_(hom)|NC_003210_RFN(-)_-_(hom)	0	-	RFN2_NC_000964|UD(5'(0-0)|3'(0-1))	-	-	-B.subtilis_sigG_2(9.41|-248)
Bacillus_amyloliquefaciens_FZB42	|	Candidate_95_NC_009725	|	RBAM_023570		GlyQ	*	<<<	23	|	2478169	2478299	>>>	130	|	147	<<<	RBAM_023580	RecO	*	candidate	721	7.6e-27	F		3	RNA	Bacillus_subtilis_chromosome<>Bacillus_licheniformis_ATCC_14580_chromosome<>Bacillus_licheniformis_DSM_13_chromosome	NC_000964_T1box7(-)_-_(hom|rev)|NC_003210_T1box2(-)_-_(hom|rev)|NC_000964_T1box8(-)_-_(hom|rev)|NC_000964_T1box9(-)_-_(hom|rev)	2	Candidate_52_NC_009725(anti),Candidate_57_NC_009725(para),Candidate_59_NC_009725(para)	-	-	-	-
Bacillus_amyloliquefaciens_FZB42	|	Candidate_97_NC_009725	|	RBAM_002830		hypothetical protein	*	>>>	11	|	257473	257778	>>>	305	|	28	>>>	RBAM_002840	RtpA	*	candidate	1075	6.4e-43	Z		3	RNA	Bacillus_subtilis_chromosome<>Bacillus_licheniformis_ATCC_14580_chromosome<>Bacillus_licheniformis_DSM_13_chromosome	NC_000964_T1box2(+)_+_(hom)|NC_003210_T1box13(+)_+_(hom)|NC_000964_T1box11(-)_-_(hom)|NC_003210_T1box8(-)_-_(hom)|NC_002745_T1box5(+)_+_(hom)	0	-	-	5	-	-Multi_s54(10.02|-344)B.subtilis_sigA_2(10.74|-291)
Bacillus_amyloliquefaciens_FZB42	|	Candidate_99_NC_009725	|	RBAM_025710		PheS	*	<<<	51	|	2694535	2694658	<<<	123	|	183	<<<	RBAM_025720	YsgA	*	candidate	204	5.8e-16	Z		8	RNA	Bacillus_subtilis_chromosome<>Bacillus_cereus_ATCC_10987_chromosome<>Bacillus_cereus_ATCC14579_chromosome<>Bacillus_licheniformis_ATCC_14580_chromosome<>Bacillus_cereus_ZK_chromosome<>Bacillus_licheniformis_DSM_13_chromosome<>Geobacillus_kaustophilus_HTA426_chromosome<>Geobacillus_thermodenitrificans_NG80-2_chromosome	NC_002745_T1box8(-)_-_(hom)|NC_000964_T1box13(-)_-_(hom)|NC_000964_T1box18(+)_+_(hom)|NC_003210_T1box5(-)_-_(hom)|NC_000964_T1box2(+)_+_(hom)|NC_002745_T1box4(+)_+_(hom)|NC_000964_T1box6(+)_+_(hom)|NC_002745_T1box7(-)_-_(hom)|NC_000964_T1box8(-)_-_(hom)	1	Candidate_44_NC_009725(para)	T1box1_NC_003210|3'(0),T1box3_NC_002745|3'(0)	-	RS	-
Bacillus_amyloliquefaciens_FZB42	|	Candidate_100_NC_009725	|	RBAM_025930		InfC	*	<<<	82	|	2716867	2716974	<<<	107	|	199	<<<	RBAM_025940	YsbB	*	candidate	747	9.9e-28	Z		2	RNA	Bacillus_subtilis_chromosome<>Bacillus_licheniformis_ATCC_14580_chromosome	NC_003210_lhrB(-)_-_(hom)	0	-	lhrB_NC_003210|3'(0)	-	-	-B.subtilis_sigA_2(10.05|-144)
Bacillus_amyloliquefaciens_FZB42	|	Candidate_101_NC_009725	|	RBAM_025990		ThrS	*	<<<	27	|	2723925	2724240	<<<	315	|	66	<<<	RBAM_026000	YtxC	*	candidate	838	3.8e-32	Z		3	RNA	Bacillus_subtilis_chromosome<>Bacillus_licheniformis_ATCC_14580_chromosome<>Bacillus_licheniformis_DSM_13_chromosome	NC_000964_T1box12(-)_-_(hom)|NC_000964_T1box15(-)_-_(hom)|NC_000964_T1box16(-)_-_(hom)|NC_000964_T1box17(-)_-_(hom)	0	-	T1box12_NC_000964|UD(5'(1-1)|3'(0-0)),T1box6_NC_003210|3'(0),T1box8_NC_002745|3'(0),T1box15_NC_000964|3'(0),T1box16_NC_000964|3'(0),T1box17_NC_000964|3'(0)	5	-	-B.subtilis_sigA_2(10.28|-291)
Bacillus_amyloliquefaciens_FZB42	|	Candidate_103_NC_009725	|	RBAM_000230		YaaJ	*	>>>	86	|	27462	27777	>>>	315	|	80	>>>	RBAM_000250	DnaX	*	candidate	843	1.7e-32	Z		60	RNA	Bacillus_subtilis_chromosome<>Bacillus_halodurans_chromosome<>Staphylococcus_aureus_N315_chromosome<>Staphylococcus_aureus_Mu50_chromosome<>Staphylococcus_aureus_COL_chromosome<>Staphylococcus_aureus_aureus_MRSA252_chromosome<>Staphylococcus_aureus_aureus_MSSA476_chromosome<>Listeria_monocytogenes_4b_F2365_chromosome<>Staphylococcus_epidermidis_RP62A_chromosome<>Clostridium_acetobutylicum_chromos…	NC_000964_SRP_bact(+)_+_(hom)|NC_002745_SRP_bact(+)_+_(hom)|NC_003210_SRP_bact(-)_-_(hom)|NC_002516_SRP_bact(+)_+_(hom)|NC_000913_ffs_SRP(+)_+_(hom)|NC_002505_SRP_bact(+)_+_(hom)	0	-	SRP_bact_NC_000964|UD(5'(0-0)|3'(1-1)),SRP_bact_NC_003047|3'(0)	-	-	-
Bacillus_amyloliquefaciens_FZB42	|	Candidate_104_NC_009725	|	RBAM_026790		TyrS	*	<<<	27	|	2805468	2805771	<<<	303	|	5	<<<	RBAM_026800	AcsA	*	candidate	799	2.2e-30	Z		3	RNA	Bacillus_subtilis_chromosome<>Bacillus_licheniformis_ATCC_14580_chromosome<>Bacillus_licheniformis_DSM_13_chromosome	NC_000964_T1box13(-)_-_(hom)|NC_002745_T1box7(-)_-_(hom)|NC_000964_T1box5(+)_+_(hom)|NC_003210_T1box5(-)_-_(hom)|NC_002745_T1box8(-)_-_(hom)|NC_003210_T1box1(+)_+_(hom)|NC_002745_T1box4(+)_+_(hom)|NC_003210_T1box12(+)_+_(hom)|NC_000964_T1box3(-)_-_(hom)|NC_003210_T1box3(-)_-_(hom)|NC_000964_T1box2(+)_+_(hom)|NC_003210_T1box10(-)_-_(hom)	1	Candidate_44_NC_009725(para)	T1box13_NC_000964|UD(5'(0-0)|3'(0-0)),T1box7_NC_003210|3'(0),T1box9_NC_002745|3'(0)	5	RS	-
Bacillus_amyloliquefaciens_FZB42	|	Candidate_105_NC_009725	|	RBAM_027250		LeuS	*	<<<	89	|	2852742	2852801	<<<	59	|	275	<<<	RBAM_027260	YtvB	*	candidate	232	4.2e-17	Z		8	RNA	Bacillus_subtilis_chromosome<>Bacillus_anthracis_Ames_chromosome<>Bacillus_anthracis_str_Sterne_chromosome<>Bacillus_licheniformis_ATCC_14580_chromosome<>Bacillus_cereus_ZK_chromosome<>Bacillus_licheniformis_DSM_13_chromosome<>Bacillus_anthracis_Ames_0581_chromosome<>Bacillus_thuringiensis_Al_Hakam_chromosome	NC_000964_T1box14(-)_-_(hom)|NC_003210_T1box10(-)_-_(hom)|NC_000964_T1box1(+)_+_(hom)|NC_000964_T1box5(+)_+_(hom)|NC_000964_T1box18(+)_+_(hom)|NC_003210_T1box4(-)_-_(hom)|NC_000964_T1box8(-)_-_(hom)|NC_000964_T1box11(-)_-_(hom)|NC_002745_T1box7(-)_-_(hom)	1	Candidate_85_NC_009725(para)	T1box14_NC_000964|UD(5'(1-1)|3'(0-0)),T1box10_NC_003210|3'(0)	-	RS	-
Bacillus_amyloliquefaciens_FZB42	|	Candidate_109_NC_009725	|	RBAM_029830		YusC	*	<<<	53	|	3103039	3103215	<<<	176	|	92	<<<	RBAM_029840	YusD	*	candidate	675	7.4e-25	Z		12	RNA	Bacillus_subtilis_chromosome<>Bacillus_anthracis_Ames_chromosome<>Bacillus_cereus_ATCC14579_chromosome<>Bacillus_anthracis_str_Sterne_chromosome<>Bacillus_thuringiensis_konkukian_chromosome<>Bacillus_licheniformis_ATCC_14580_chromosome<>Bacillus_licheniformis_DSM_13_chromosome<>Geobacillus_kaustophilus_HTA426_chromosome<>Bacillus_anthracis_Ames_0581_chromosome<>Bacillus_thuringiensis_Al_Hakam_chr…	NC_000964_S_box9(-)_-_(hom)|NC_002745_S_box2(+)_+_(hom)|NC_000964_S_box6(+)_+_(hom)|NC_000964_S_box10(+)_+_(hom)|NC_003210_S_box3(-)_-_(hom)|NC_000964_S_box11(+)_+_(hom)|NC_000964_S_box5(+)_+_(hom)|NC_002745_S_box4(-)_-_(hom)|NC_003210_S_box1(+)_+_(hom)|NC_003210_S_box2(-)_-_(hom)|NC_000964_S_box8(-)_-_(hom)|NC_000964_S_box3(-)_-_(hom)	7	Candidate_120_NC_009725(para),Candidate_41_NC_009725(para),Candidate_3_NC_009725(para),Candidate_45_NC_009725(para),Candidate_79_NC_009725(para),Candidate_39_NC_009725(para),Candidate_15_NC_009725(para)	S_box9_NC_000964|UD(5'(1-1)|3'(0-0)),S_box7_NC_003210|3'(0),S_box2_NC_002745|3'(0)	-	RS	-
Bacillus_amyloliquefaciens_FZB42	|	Candidate_110_NC_009725	|	RBAM_030880		YrdF	*	<<<	27	|	3203939	3204340	<<<	401	|	176	<<<	RBAM_030890	SmpB	*	candidate	611	3.9e-22	Y		21	RNA	Bacillus_halodurans_chromosome<>Listeria_monocytogenes_4b_F2365_chromosome<>Listeria_monocytogenes_chromosome<>Listeria_innocua_chromosome<>Bacillus_cereus_ATCC_10987_chromosome<>Bacillus_anthracis_Ames_chromosome<>Oceanobacillus_iheyensis_chromosome<>Enterococcus_faecalis_V583_chromosome<>Bacillus_cereus_ATCC14579_chromosome<>Bacillus_anthracis_str_Sterne_chromosome<>Bacillus_thuringiensis_konku…	NC_000964_tmRNA(-)_-_(hom)|NC_003210_tmRNA(-)_-_(hom)|NC_002745_tmRNA(+)_+_(hom)	0	-	tmRNA_NC_000964|UD(5'(0-0)|3'(1-0))	5	-	-B.subtilis_sigA_1(11.61|-466)
Bacillus_amyloliquefaciens_FZB42	|	Candidate_119_NC_009725	|	RBAM_036060		YxkD	*	<<<	22	|	3712072	3712169	>>>	97	|	294	>>>	RBAM_036070	YxkC	*	candidate	605	9.3e-22	X		3	RNA	Bacillus_subtilis_chromosome<>Bacillus_licheniformis_ATCC_14580_chromosome<>Bacillus_licheniformis_DSM_13_chromosome	NC_000964_ykkC1yxkD2(-)_-_(hom|rev)|NC_000964_ykkC1yxkD1(+)_+_(hom|rev)	2	Candidate_17_NC_009725(para),Candidate_37_NC_009725(para)	-	-	-	-B.subtilis_sigG_1(8.79|-166)
Bacillus_amyloliquefaciens_FZB42	|	Candidate_120_NC_009725	|	RBAM_036110		YxjI	*	>>>	16	|	3716950	3717152	>>>	202	|	30	>>>	RBAM_036120	YxjG	*	candidate	306	3.7e-26	Z		1	-	Bacillus_subtilis_chromosome	NC_000964_S_box11(+)_+_(hom)|NC_000964_S_box10(+)_+_(hom)|NC_000964_S_box9(-)_-_(hom)|NC_000964_S_box5(+)_+_(hom)|NC_000964_S_box7(-)_-_(hom)|NC_003210_S_box3(-)_-_(hom)|NC_003210_S_box6(-)_-_(hom)|NC_002745_S_box2(+)_+_(hom)|NC_000964_S_box2(+)_+_(hom)|NC_002745_S_box3(-)_-_(hom)|NC_000964_S_box6(+)_+_(hom)|NC_003210_S_box1(+)_+_(hom)|NC_002745_S_box4(-)_-_(hom)	7	Candidate_41_NC_009725(para),Candidate_109_NC_009725(para),Candidate_3_NC_009725(para),Candidate_15_NC_009725(para),Candidate_45_NC_009725(para),Candidate_79_NC_009725(para),Candidate_33_NC_009725(para)	S_box10_NC_000964|UD(5'(0-0)|3'(1-1)),S_box11_NC_000964|UD(5'(0-1)|3'(0-0)),S_box4_NC_003210|3'(0)	5	-	-B.subtilis_sigA_1(10.07|-171)
Bacillus_amyloliquefaciens_FZB42	|	Candidate_126_NC_009725	|	RBAM_004530		YdaN	*	>>>	5	|	454214	454599	<<<	385	|	43	>>>	RBAM_004540	YdaO	*	candidate	1105	2.4e-44	X		1	RNA	Bacillus_subtilis_chromosome	NC_000964_ydaO1yuaA1(+)_+_(hom|rev)|NC_000964_ydaO1yuaA2(+)_+_(hom|rev)	0	Candidate_127_NC_009725(anti)	-	-	-	-B.subtilis_sigA_1(9.83|-370)
Bacillus_amyloliquefaciens_FZB42	|	Candidate_127_NC_009725	|	RBAM_004530		YdaN	*	>>>	74	|	454283	454545	>>>	262	|	97	>>>	RBAM_004540	YdaO	*	candidate	632	3.9e-23	Z		2	RNA	Bacillus_subtilis_chromosome<>Bacillus_licheniformis_DSM_13_chromosome	NC_000964_ydaO1yuaA1(+)_+_(hom)|NC_000964_ydaO1yuaA2(+)_+_(hom)	0	Candidate_126_NC_009725(anti)	ydaO1yuaA1_NC_000964|UD(5'(0-0)|3'(1-1))	-	-	-B.subtilis_sigA_2(9.71|-210)
Bacillus_amyloliquefaciens_FZB42	|	Candidate_133_NC_009725	|	RBAM_006780		hypothetical protein	*	>>>	33	|	656454	656725	>>>	271	|	51	>>>	RBAM_006790	PbuG	*	candidate	561	6.8e-20	Z		3	RNA	Bacillus_subtilis_chromosome<>Bacillus_licheniformis_ATCC_14580_chromosome<>Bacillus_licheniformis_DSM_13_chromosome	NC_000964_Purine2(+)_+_(hom)|NC_000964_Purine4(-)_-_(hom)|NC_000964_Purine3(+)_+_(hom)|NC_002745_Purine(+)_+_(hom)	3	Candidate_29_NC_009725(para),Candidate_8_NC_009725(para),Candidate_48_NC_009725(para)	Purine2_NC_000964|3'(0),Purine1_NC_003210|3'(0)	5	RS	-B.subtilis_sigA_2(9.85|-187)
Bacillus_amyloliquefaciens_FZB42	|	Candidate_136_NC_009725	|	RBAM_009050		YgaJ	*	>>>	194	|	885442	885522	<<<	80	|	6	>>>	RBAM_009060	ThiC	*	candidate	714	2.1e-26	X		1	-	Bacillus_subtilis_chromosome	NC_000964_THI1(+)_+_(hom|rev)	0	Candidate_137_NC_009725(anti)	-	-	-	-
Bacillus_amyloliquefaciens_FZB42	|	Candidate_137_NC_009725	|	RBAM_009050		YgaJ	*	>>>	40	|	885288	885478	>>>	190	|	50	>>>	RBAM_009060	ThiC	*	candidate	714	2.1e-26	Z		1	-	Bacillus_subtilis_chromosome	NC_000964_THI1(+)_+_(hom)|NC_000964_THI3(-)_-_(hom)|NC_000964_THI4(+)_+_(hom)|NC_000913_THI1(-)_-_(hom)	0	Candidate_136_NC_009725(anti)	THI1_NC_000964|UD(5'(0-0)|3'(0-0)),THI_NC_002516|3'(0),THI1_NC_003112|3'(0),THI2_NC_000913|3'(0),THI1_NC_002505|3'(0),THI_NC_005072|3'(0)	5	-	-
Bacillus_anthracis_Ames	|	Candidate_6_NC_003997	|	BA0984		hypothetical protein	*	<<<	1	|	982844	983071	>>>	227	|	2	<<<	BA0985	lipoprotein, putative	*	candidate	1146	1.5e-46	R		3	RNA	Bacillus_thuringiensis_konkukian_chromosome<>Bacillus_cereus_ZK_chromosome<>Bacillus_thuringiensis_Al_Hakam_chromosome	NC_002745_T1box7(-)_-_(hom|rev)	0	-	-	-	-	-
Bacillus_anthracis_Ames	|	Candidate_19_NC_003997	|	BA2623		hypothetical protein	*	>>>	60	|	2442580	2442761	>>>	181	|	55	<<<	BA2624	hypothetical protein	*	candidate	548	6.7e-19	R		5	RNA	Bacillus_cereus_ATCC_10987_chromosome<>Bacillus_cereus_ATCC14579_chromosome<>Bacillus_thuringiensis_konkukian_chromosome<>Bacillus_cereus_ZK_chromosome<>Bacillus_thuringiensis_Al_Hakam_chromosome	NC_002505_B2(-)_-_(hom)	2	Candidate_345_NC_003997(anti),Candidate_215_NC_003997(para),Candidate_725_NC_003997(para)	-	-	-	-B.subtilis_sigK_2(12.35|-85)
Bacillus_anthracis_Ames	|	Candidate_99_NC_003997	|	BA4432		rhodanese-like domain protein	*	>>>	12	|	4039998	4040216	<<<	218	|	18	>>>	BA4433	sugar-binding transcriptional regulator, LacI	*	candidate	583	1.4e-20	R		6	RNA	Bacillus_cereus_ATCC_10987_chromosome<>Bacillus_cereus_ATCC14579_chromosome<>Bacillus_thuringiensis_konkukian_chromosome<>Bacillus_cereus_ZK_chromosome<>Bacillus_thuringiensis_Al_Hakam_chromosome<>Bacillus_cereus_cytotoxis_NVH_391-98_chromosome	NC_005072_yfr4(+)_+_(hom)	0	-	-	-	-	-
Bacillus_anthracis_Ames	|	Candidate_117_NC_003997	|	BA2477		hypothetical protein	*	<<<	242	|	2304838	2305087	<<<	249	|	277	>>>	BA2479	transcriptional regulator, TetR family	*	candidate	647	5.9e-24	R		1	RNA	Bacillus_cereus_ATCC_10987_chromosome	NC_000913_IS063_tke8_micC(+)_+_(hom|rev)	4	Candidate_312_NC_003997(para),Candidate_31_NC_003997(para),Candidate_632_NC_003997(para),Candidate_633_NC_003997(para)	-	-	-	-B.subtilis_sigK_1(11.82|-68)B.subtilis_sigK_1(11.46|-182)B.subtilis_sigK_3(9.45|-68)B.subtilis_sigK_3(9.69|-182)
Bacillus_anthracis_Ames	|	Candidate_127_NC_003997	|	BA1603		hypothetical protein	*	>>>	1	|	1510218	1510606	<<<	388	|	302	>>>	BA1605	cation transporter, putative	*	candidate	539	6.5e-19	R		1	RNA	Clostridium_beijerinckii_NCIMB_8052_chromosome	NC_000964_ykoK(+)_+_(hom|rev)|NC_003210_ykoK(-)_-_(hom|rev)|NC_002505_ykoK(+)_+_(hom|rev)	0	ykoK_NC_003997(anti)	-	-	-	-
Bacillus_anthracis_Ames	|	Candidate_142_NC_003997	|	BA0831		acetyltransferase	*	>>>	15	|	841268	841602	<<<	334	|	8	>>>	BA0832	sugE protein, putative	*	candidate	707	3.2e-26	R		4	RNA	Bacillus_cereus_ATCC14579_chromosome<>Bacillus_thuringiensis_konkukian_chromosome<>Bacillus_cereus_ZK_chromosome<>Bacillus_thuringiensis_Al_Hakam_chromosome	NC_000913_C0067(+)_+_(hom)	4	Candidate_52_NC_003997(para),Candidate_617_NC_003997(para),Candidate_736_NC_003997(para),Candidate_737_NC_003997(para)	-	-	-	-B.subtilis_sigG_2(9.37|-213)
Bacillus_anthracis_Ames	|	Candidate_169_NC_003997	|	BA0159		D-fructose-6-phosphate amidotransferase	*	>>>	17	|	159694	159870	>>>	176	|	169	>>>	BA0160	hypothetical protein	*	candidate	1630	3.4e-68	T		2	RNA	Bacillus_thuringiensis_konkukian_chromosome<>Bacillus_cereus_ZK_chromosome	NC_002745_RNAIII(-)_-_(hom|rev)	1	Candidate_383_NC_003997(para)	-	-	-	-B.subtilis_sigG_1(8.22|-263)
Bacillus_anthracis_Ames	|	Candidate_228_NC_003997	|	BA0953		hypothetical protein	*	>>>	64	|	958502	958612	<<<	110	|	179	<<<	BA0954	mxaA domain protein	*	candidate	483	7.9e-16	T		3	RNA	Bacillus_cereus_ATCC14579_chromosome<>Bacillus_cereus_ZK_chromosome<>Bacillus_thuringiensis_Al_Hakam_chromosome	NC_002745_sprG(-)_-_(hom)|NC_002745_sprF(+)_+_(hom|rev)	3	Candidate_233_NC_003997(para),Candidate_738_NC_003997(para),Candidate_554_NC_003997(para)	-	-	-	-
Bacillus_anthracis_Ames	|	Candidate_232_NC_003997	|	BA0977		hypothetical protein	*	>>>	514	|	977431	977524	<<<	93	|	28	<<<	BA0978	hypothetical protein	*	candidate	857	3.8e-33	T		5	-	Bacillus_thuringiensis_konkukian_chromosome<>Bacillus_cereus_ZK_chromosome<>Bacillus_cereus_ZK_plasmid_pE33L466<>Bacillus_thuringiensis_Al_Hakam_plasmid_pALH1<>Bacillus_thuringiensis_Al_Hakam_chromosome	NC_002745_S_box3(-)_-_(hom)	0	-	-	-	-	-
Bacillus_anthracis_Ames	|	Candidate_263_NC_003997	|	BA1469		hypothetical protein	*	>>>	-2	|	1389528	1389727	<<<	199	|	95	<<<	BA1470	hypothetical protein	*	candidate	935	2.7e-36	T		5	RNA	Bacillus_cereus_ATCC_10987_chromosome<>Bacillus_thuringiensis_konkukian_chromosome<>Bacillus_cereus_ZK_chromosome<>Bacillus_thuringiensis_Al_Hakam_chromosome<>Bacillus_cereus_cytotoxis_NVH_391-98_chromosome	NC_000964_S_box6(+)_+_(hom|rev)	0	-	-	-	-	-B.subtilis_sigG_1(8.2|-231)
Bacillus_anthracis_Ames	|	Candidate_279_NC_003997	|	BA1641		transcriptional regulator, MerR family	*	>>>	1	|	1555490	1555590	>>>	100	|	36	>>>	BA1642	MATE efflux family protein, putative	*	candidate	645	4.9e-23	T		4	-	Bacillus_cereus_ATCC14579_chromosome<>Bacillus_thuringiensis_konkukian_chromosome<>Bacillus_cereus_ZK_chromosome<>Bacillus_thuringiensis_Al_Hakam_chromosome	NC_002745_RNAIII(-)_-_(hom|rev)	0	-	-	5	-	-
Bacillus_anthracis_Ames	|	Candidate_284_NC_003997	|	BA1741		hypothetical protein	*	>>>	1	|	1634634	1634703	>>>	69	|	88	>>>	BA1742	hypothetical protein	*	candidate	535	1.2e-18	T		4	RNA	Bacillus_cereus_ATCC_10987_chromosome<>Bacillus_thuringiensis_konkukian_chromosome<>Bacillus_cereus_ZK_chromosome<>Bacillus_thuringiensis_Al_Hakam_chromosome	NC_003210_rliE(+)_+_(hom|rev)	0	-	-	-	-	-
Bacillus_anthracis_Ames	|	Candidate_285_NC_003997	|	BA1764		hypothetical protein	*	>>>	104	|	1653482	1653542	>>>	60	|	167	>>>	BA1766	Na+/H+ antiporter NhaC	*	candidate	730	3.5e-27	T		5	RNA	Bacillus_cereus_ATCC_10987_chromosome<>Bacillus_thuringiensis_konkukian_chromosome<>Bacillus_cereus_ZK_chromosome<>Bacillus_thuringiensis_Al_Hakam_chromosome<>Bacillus_cereus_cytotoxis_NVH_391-98_chromosome	NC_000964_SR1(+)_+_(hom)	1	Candidate_59_NC_003997(para)	-	-	-	-B.subtilis_sigG_3(8.07|-58)
Bacillus_anthracis_Ames	|	Candidate_289_NC_003997	|	BA1860		hydrolase, alpha/beta fold family	*	>>>	1	|	1744535	1744792	>>>	257	|	165	>>>	BA1861	methyl-accepting/DNA response regulator,	*	candidate	1971	2e-83	B		1	RNA	Bacillus_cereus_ZK_chromosome	NC_003210_S_box6(-)_-_(hom)	0	Candidate_125_NC_003997(anti)	-	-	-	-
Bacillus_anthracis_Ames	|	Candidate_299_NC_003997	|	BA2000		transition state transcriptional regulatory	*	>>>	1	|	1882367	1882442	>>>	75	|	197	>>>	BA2001	intracellular serine protease	*	candidate	1352	2.9e-55	T		5	RNA	Bacillus_cereus_ATCC_10987_chromosome<>Bacillus_cereus_ATCC14579_chromosome<>Bacillus_thuringiensis_konkukian_chromosome<>Bacillus_cereus_ZK_chromosome<>Bacillus_thuringiensis_Al_Hakam_chromosome	NC_002745_sprF(+)_+_(hom|rev)	0	-	-	-	-	-
Bacillus_anthracis_Ames	|	Candidate_312_NC_003997	|	BA2334		hypothetical protein	*	>>>	694	|	2171437	2171637	<<<	200	|	2	<<<	BA2335	hypothetical protein	*	candidate	2259	7.5e-97	B		4	-	Bacillus_cereus_ATCC_10987_chromosome<>Bacillus_thuringiensis_konkukian_chromosome<>Bacillus_cereus_ZK_chromosome<>Bacillus_thuringiensis_Al_Hakam_chromosome	NC_005072_yfr3(+)_+_(hom)	3	Candidate_603_NC_003997(opp),Candidate_117_NC_003997(para),Candidate_150_NC_003997(para)	-	-	-	-B.subtilis_sigK_3(10.68|-70)B.subtilis_sigA_3(9.49|-177)
Bacillus_anthracis_Ames	|	Candidate_315_NC_003997	|	BA2355		homoserine/threonine efflux protein, putative	*	<<<	100	|	2191014	2191072	<<<	58	|	24	<<<	BA2356	enoyl-CoA hydratase	*	candidate	526	6.4e-18	T		4	RNA	Bacillus_cereus_ATCC_10987_chromosome<>Bacillus_cereus_ATCC14579_chromosome<>Bacillus_thuringiensis_konkukian_chromosome<>Bacillus_cereus_ZK_chromosome	NC_002516_P8_yes(+)_+_(hom|rev)	0	-	-	-	-	-
Bacillus_anthracis_Ames	|	Candidate_320_NC_003997	|	BA2402		hypothetical protein	*	>>>	1	|	2241111	2241357	>>>	246	|	49	<<<	BA2403	hypothetical protein	*	candidate	1351	8.9e-56	T		3	RNA	Bacillus_thuringiensis_konkukian_chromosome<>Bacillus_cereus_ZK_chromosome<>Bacillus_thuringiensis_Al_Hakam_chromosome	NC_002745_T1box6(+)_+_(hom)	0	Candidate_319_NC_003997(anti)	-	-	-	-
Bacillus_anthracis_Ames	|	Candidate_340_NC_003997	|	BA2529		Frameshift	*	>>>	1	|	2353831	2353943	>>>	112	|	293	>>>	BA2530	transcriptional regulator, TetR family	*	candidate	1867	1.1e-78	B		4	RNA	Bacillus_cereus_ATCC14579_chromosome<>Bacillus_thuringiensis_konkukian_chromosome<>Bacillus_cereus_ZK_chromosome<>Bacillus_thuringiensis_Al_Hakam_chromosome	NC_003210_S_box3(-)_-_(hom|rev)	0	Candidate_116_NC_003997(anti)	-	-	-	-B.subtilis_sigG_1(8.91|-152)
Bacillus_anthracis_Ames	|	Candidate_345_NC_003997	|	BA2623		hypothetical protein	*	>>>	12	|	2442532	2442770	<<<	238	|	46	<<<	BA2624	hypothetical protein	*	candidate	548	6.7e-19	T		5	RNA	Bacillus_cereus_ATCC_10987_chromosome<>Bacillus_cereus_ATCC14579_chromosome<>Bacillus_thuringiensis_konkukian_chromosome<>Bacillus_cereus_ZK_chromosome<>Bacillus_thuringiensis_Al_Hakam_chromosome	NC_002505_B2(-)_-_(hom|rev)	2	Candidate_19_NC_003997(anti),Candidate_215_NC_003997(para),Candidate_725_NC_003997(para)	-	-	-	-B.subtilis_sigG_1(8.34|-276)B.subtilis_sigA_2(9.31|-295)B.subtilis_sigA_3(9.9|-272)
Bacillus_anthracis_Ames	|	Candidate_358_NC_003997	|	BA2722		hypothetical protein	*	>>>	299	|	2529417	2529729	<<<	312	|	277	>>>	BA2723	Frameshift	*	candidate	490	8.2e-54	T		1	RNA	Bacillus_cereus_ATCC14579_chromosome	NC_003210_rliB(+)_+_(hom)	0	-	-	-	-	-B.subtilis_sigG_3(8.38|-293)B.subtilis_sigA_1(9.74|-163)
Bacillus_anthracis_Ames	|	Candidate_365_NC_003997	|	BA2917		hypothetical protein	*	>>>	109	|	2690453	2690572	<<<	119	|	0	<<<	BA2918	hypothetical protein	*	candidate	943	5e-37	B		6	RNA	Bacillus_cereus_ATCC_10987_chromosome<>Bacillus_cereus_ATCC14579_chromosome<>Bacillus_thuringiensis_konkukian_chromosome<>Bacillus_cereus_ZK_chromosome<>Bacillus_thuringiensis_Al_Hakam_chromosome<>Bacillus_cereus_cytotoxis_NVH_391-98_chromosome	NC_002745_T1box9(-)_-_(hom)	0	-	-	-	-	-
Bacillus_anthracis_Ames	|	Candidate_412_NC_003997	|	BA3443		enhancin family protein	*	<<<	229	|	3167865	3167940	<<<	75	|	37	<<<	BA3444	hypothetical protein	*	candidate	918	9.4e-36	B		2	RNA	Bacillus_cereus_ATCC14579_chromosome<>Bacillus_cereus_ZK_plasmid_pE33L466	NC_003210_Purine1(-)_-_(hom|rev)	1	Candidate_29_NC_003997(anti),Candidate_124_NC_003997(para)	-	-	-	-
Bacillus_anthracis_Ames	|	Candidate_431_NC_003997	|	BA3586		acetyltransferase, GNAT family	*	>>>	2	|	3293190	3293504	>>>	314	|	-22	<<<	BA3587	glyoxalase family protein	*	candidate	1416	3.2e-58	T		1	RNA	Bacillus_thuringiensis_Al_Hakam_chromosome	NC_005072_yfr3(+)_+_(hom|rev)	0	-	-	-	-	-
Bacillus_anthracis_Ames	|	Candidate_468_NC_003997	|	BA4274		N-acetylglucosamine-6-phosphate deacetylase	*	<<<	99	|	3910903	3911000	<<<	97	|	11	<<<	BA4275	metallo-beta-lactamase family protein	*	candidate	808	1.4e-30	T		6	RNA	Bacillus_cereus_ATCC_10987_chromosome<>Bacillus_cereus_ATCC14579_chromosome<>Bacillus_thuringiensis_konkukian_chromosome<>Bacillus_cereus_ZK_chromosome<>Bacillus_thuringiensis_Al_Hakam_chromosome<>Bacillus_cereus_cytotoxis_NVH_391-98_chromosome	NC_002745_sprC(-)_-_(hom)	0	-	-	-	-	-B.subtilis_sigA_1(10.06|-51)B.subtilis_sigA_1(10.06|-143)B.subtilis_sigA_2(9.04|-51)
Bacillus_anthracis_Ames	|	Candidate_477_NC_003997	|	BA4538		chaperone protein dnaJ	*	<<<	134	|	4127457	4127526	<<<	69	|	0	<<<	BA4539	molecular chaperone DnaK	*	candidate	329	5.6e-26	T		6	RNA	Bacillus_cereus_ATCC_10987_chromosome<>Bacillus_cereus_ATCC14579_chromosome<>Bacillus_thuringiensis_konkukian_chromosome<>Bacillus_cereus_ZK_chromosome<>Bacillus_thuringiensis_Al_Hakam_chromosome<>Bacillus_cereus_cytotoxis_NVH_391-98_chromosome	NC_000964_SurC(+)_+_(hom|rev)|NC_000964_SurC(+)_+_(hom)	0	-	tpke11_NC_000913|UD(5'(0-0)|3'(0-0))	3	-	-
Bacillus_anthracis_Ames	|	Candidate_496_NC_003997	|	BA4952		aminoglycoside phosphotransferase family	*	<<<	105	|	4496790	4496919	<<<	129	|	0	<<<	BA4953	pullulanase, putative	*	candidate	1145	7.7e-46	T		5	RNA	Bacillus_cereus_ATCC_10987_chromosome<>Bacillus_cereus_ATCC14579_chromosome<>Bacillus_thuringiensis_konkukian_chromosome<>Bacillus_cereus_ZK_chromosome<>Bacillus_thuringiensis_Al_Hakam_chromosome	NC_003210_lhrC(+)_+_(hom|rev)	1	Candidate_140_NC_003997(para)	-	-	-	-
Bacillus_anthracis_Ames	|	Candidate_520_NC_003997	|	BA5311		hypothetical protein	*	>>>	37	|	4815077	4815381	>>>	304	|	93	>>>	BA5312	hypothetical protein	*	candidate	709	2.2e-26	T		6	RNA	Bacillus_cereus_ATCC_10987_chromosome<>Bacillus_cereus_ATCC14579_chromosome<>Bacillus_thuringiensis_konkukian_chromosome<>Bacillus_cereus_ZK_chromosome<>Bacillus_thuringiensis_Al_Hakam_chromosome<>Bacillus_cereus_cytotoxis_NVH_391-98_chromosome	NC_000964_ykkC1yxkD2(-)_-_(hom)	0	-	-	-	-	-B.subtilis_sigG_2(8.7|-254)
Bacillus_anthracis_Ames	|	Candidate_523_NC_003997	|	BA5314		tyrosyl-tRNA synthetase	*	<<<	31	|	4818739	4819071	<<<	332	|	0	<<<	BA5315	UDP-N-acetylenolpyruvoylglucosamine reductase	*	candidate	1787	4.9e-75	B		5	RNA	Bacillus_cereus_ATCC_10987_chromosome<>Bacillus_cereus_ATCC14579_chromosome<>Bacillus_thuringiensis_konkukian_chromosome<>Bacillus_cereus_ZK_chromosome<>Bacillus_thuringiensis_Al_Hakam_chromosome	NC_002745_T1box8(-)_-_(hom)|NC_002745_T1box1(+)_+_(hom)	0	-	T1box7_NC_003210|3'(0),T1box9_NC_002745|3'(0),T1box13_NC_000964|3'(0)	-	-	-B.subtilis_sigG_1(8.74|-298)B.subtilis_sigA_2(12.5|-255)
Bacillus_anthracis_Ames	|	Candidate_554_NC_003997	|	BA1163		DNA-binding protein	*	>>>	18	|	1134800	1135110	<<<	310	|	505	<<<	BA1166	hypothetical protein	*	candidate	1568	4.3e-65	Z		1	RNA	Bacillus_cereus_ATCC_10987_chromosome	NC_002745_RNAIII(-)_-_(hom|rev)	5	Candidate_247_NC_003997(opp),Candidate_228_NC_003997(para),Candidate_626_NC_003997(para),Candidate_233_NC_003997(para),Candidate_738_NC_003997(para)	-	-	-	-B.subtilis_sigG_3(9.43|-284)
Bacillus_anthracis_Ames	|	Candidate_569_NC_003997	|	BA1448		sodium-dependent transporter, putative	*	>>>	-1	|	1371366	1371585	<<<	219	|	41	<<<	BA1449	peptidase, M23/M37 family	*	candidate	972	4.1e-38	Z		3	RNA	Bacillus_thuringiensis_konkukian_chromosome<>Bacillus_cereus_ZK_chromosome<>Bacillus_thuringiensis_Al_Hakam_chromosome	NC_002745_sprC(-)_-_(hom)	0	Candidate_261_NC_003997(anti)	-	-	-	-B.subtilis_sigG_2(8.64|-149)
Bacillus_anthracis_Ames	|	Candidate_576_NC_003997	|	BA1589		macrolide 2-phosphotransferase, putative	*	<<<	102	|	1496277	1496707	<<<	430	|	0	>>>	BA1590	methionine aminopeptidase	*	candidate	2526	1.4e-108	X		3	RNA	Bacillus_thuringiensis_konkukian_chromosome<>Bacillus_cereus_ZK_chromosome<>Bacillus_thuringiensis_Al_Hakam_chromosome	NC_003210_rliB(+)_+_(hom|rev)	0	-	-	-	-	-B.subtilis_sigG_3(9.3|-286)
Bacillus_anthracis_Ames	|	Candidate_581_NC_003997	|	BA1834		polysaccharide biosynthesis family protein	*	<<<	65	|	1720851	1721339	>>>	488	|	190	>>>	BA1835	sodium-dependent transporter	*	candidate	2817	7e-122	X		1	RNA	Bacillus_cereus_ATCC14579_chromosome	NC_000964_T1box1(+)_+_(hom)|NC_003210_T1box1(+)_+_(hom)|NC_000964_T1box5(+)_+_(hom)|NC_000964_T1box13(-)_-_(hom)|NC_003210_T1box14(-)_-_(hom)|NC_002745_T1box7(-)_-_(hom)|NC_002745_T1box8(-)_-_(hom)|NC_000964_T1box7(-)_-_(hom)|NC_003210_T1box7(-)_-_(hom)|NC_000964_T1box18(+)_+_(hom)|NC_003210_T1box13(+)_+_(hom)|NC_002745_T1box4(+)_+_(hom)|NC_000964_T1box9(-)_-_(hom)	9	T-box_NC_003997(para),T-box_NC_003997(para),T-box_NC_003997(para),Candidate_591_NC_003997(para),T-box_NC_003997(para),T-box_NC_003997(para),T-box_NC_003997(para),T-box_NC_003997(para),T-box_NC_003997(para)	-	-	-	-B.subtilis_sigG_2(8.44|-390)
Bacillus_anthracis_Ames	|	Candidate_591_NC_003997	|	BA0011		glutamine amidotransferase, SNO family	*	>>>	61	|	20072	20308	>>>	236	|	29	>>>	BA0012	seryl-tRNA synthetase	*	candidate	197	9.3e-16	Z		8	RNA	Bacillus_halodurans_chromosome<>Bacillus_cereus_ATCC_10987_chromosome<>Oceanobacillus_iheyensis_chromosome<>Bacillus_cereus_ATCC14579_chromosome<>Bacillus_thuringiensis_konkukian_chromosome<>Bacillus_cereus_ZK_chromosome<>Bacillus_thuringiensis_Al_Hakam_chromosome<>Bacillus_cereus_cytotoxis_NVH_391-98_chromosome	NC_000964_T1box1(+)_+_(hom)|NC_003210_T1box14(-)_-_(hom)|NC_002745_T1box1(+)_+_(hom)|NC_003210_T1box12(+)_+_(hom)|NC_003210_T1box7(-)_-_(hom)|NC_000964_T1box2(+)_+_(hom)|NC_000964_T1box9(-)_-_(hom)|NC_000964_T1box7(-)_-_(hom)	8	Candidate_581_NC_003997(para),T-box_NC_003997(para),Candidate_592_NC_003997(para),T-box_NC_003997(para),T-box_NC_003997(para),T-box_NC_003997(para),Candidate_10_NC_003997(para),T-box_NC_003997(para)	T1box1_NC_000964|UD(5'(0-0)|3'(1-1)),T1box14_NC_003210|3'(0),T1box1_NC_002745|3'(0)	5	RS	-
Bacillus_anthracis_Ames	|	Candidate_592_NC_003997	|	BA2180		TPR domain protein	*	>>>	297	|	2032830	2032891	>>>	61	|	33	>>>	BA2181	isoleucyl-tRNA synthetase	*	candidate	210	1.3e-22	Z		7	-	Bacillus_cereus_ATCC_10987_chromosome<>Clostridium_tetani_E88_chromosome<>Bacillus_cereus_ATCC14579_chromosome<>Bacillus_thuringiensis_konkukian_chromosome<>Bacillus_cereus_ZK_chromosome<>Bacillus_thuringiensis_Al_Hakam_chromosome<>Bacillus_cereus_cytotoxis_NVH_391-98_chromosome	NC_000964_T1box2(+)_+_(hom)	3	Candidate_591_NC_003997(para),T-box_NC_003997(para),T-box_NC_003997(para)	T1box4_NC_002745|3'(0),T1box5_NC_003210|3'(0)	5	-	-
Bacillus_anthracis_Ames	|	Candidate_619_NC_003997	|	BA2947		sulfatase	*	<<<	22	|	2713126	2713612	>>>	486	|	7	<<<	BA2948	ABC transporter, ATP-binding protein	*	candidate	2402	6e-103	X		1	RNA	Bacillus_thuringiensis_Al_Hakam_chromosome	NC_002745_RFN1(-)_-_(hom|rev)|NC_002745_RNAIII(-)_-_(hom|rev)	0	-	-	-	-	-B.subtilis_sigG_1(8.08|-379)
Bacillus_anthracis_Ames	|	Candidate_620_NC_003997	|	BA2948		ABC transporter, ATP-binding protein	*	<<<	305	|	2715551	2715603	<<<	52	|	19	<<<	BA2949	hypothetical protein	*	candidate	1722	4.2e-72	Z		5	RNA	Bacillus_cereus_ATCC_10987_chromosome<>Bacillus_cereus_ATCC14579_chromosome<>Bacillus_thuringiensis_konkukian_chromosome<>Bacillus_cereus_ZK_chromosome<>Bacillus_thuringiensis_Al_Hakam_chromosome	NC_003210_rliB(+)_+_(hom)	0	Candidate_621_NC_003997(anti)	-	3	-	-B.subtilis_sigG_3(8.38|-133)
Bacillus_anthracis_Ames	|	Candidate_621_NC_003997	|	BA2948		ABC transporter, ATP-binding protein	*	<<<	1	|	2715247	2715585	>>>	338	|	37	<<<	BA2949	hypothetical protein	*	candidate	1722	4.2e-72	X		5	RNA	Bacillus_cereus_ATCC_10987_chromosome<>Bacillus_cereus_ATCC14579_chromosome<>Bacillus_thuringiensis_konkukian_chromosome<>Bacillus_cereus_ZK_chromosome<>Bacillus_thuringiensis_Al_Hakam_chromosome	NC_003210_rliB(+)_+_(hom|rev)	0	Candidate_620_NC_003997(anti)	-	-	-	-B.subtilis_sigA_1(9.06|-474)
Bacillus_anthracis_Ames	|	Candidate_623_NC_003997	|	BA0022		hypothetical protein	*	>>>	-4	|	28396	28548	<<<	152	|	65	>>>	BA0024	sigma-k factor processing regulatory protein	*	candidate	688	5.2e-25	X		3	RNA	Bacillus_thuringiensis_konkukian_chromosome<>Bacillus_cereus_ZK_chromosome<>Bacillus_thuringiensis_Al_Hakam_chromosome	NC_003210_rliE(+)_+_(hom|rev)	0	-	-	-	-	-
Bacillus_anthracis_Ames	|	Candidate_632_NC_003997	|	BA3522		hypothetical protein	*	<<<	291	|	3232804	3233107	<<<	303	|	35	<<<	BA3523	hypothetical protein	*	candidate	773	1.9e-29	Y		4	RNA	Bacillus_cereus_ATCC14579_chromosome<>Bacillus_thuringiensis_konkukian_chromosome<>Bacillus_cereus_ZK_chromosome<>Bacillus_thuringiensis_Al_Hakam_chromosome	NC_002745_RFN1(-)_-_(hom)	3	Candidate_31_NC_003997(anti),Candidate_633_NC_003997(anti),Candidate_234_NC_003997(para),Candidate_738_NC_003997(para),Candidate_117_NC_003997(para)	-	-	-	-B.subtilis_sigG_3(8.08|-186)
Bacillus_anthracis_Ames	|	Candidate_633_NC_003997	|	BA3522		hypothetical protein	*	<<<	331	|	3232844	3233082	>>>	238	|	60	<<<	BA3523	hypothetical protein	*	candidate	773	1.9e-29	X		1	RNA	Bacillus_cereus_ATCC14579_chromosome	NC_002745_RFN1(-)_-_(hom|rev)	4	Candidate_31_NC_003997(tandem),Candidate_632_NC_003997(anti),Candidate_234_NC_003997(para),Candidate_738_NC_003997(para),Candidate_117_NC_003997(para)	-	-	-	-B.subtilis_sigG_3(8.05|-84)
Bacillus_anthracis_Ames	|	Candidate_660_NC_003997	|	BA4179		hypothetical protein	*	<<<	1	|	3827160	3827386	>>>	226	|	9	<<<	BA4181	dihydrolipoamide dehydrogenase	*	candidate	1158	9.8e-47	F		4	RNA	Bacillus_cereus_ATCC14579_chromosome<>Bacillus_thuringiensis_konkukian_chromosome<>Bacillus_cereus_ZK_chromosome<>Bacillus_thuringiensis_Al_Hakam_chromosome	NC_000964_T1box13(-)_-_(hom|rev)	4	Candidate_29_NC_003997(para),Candidate_366_NC_003997(para),Candidate_17_NC_003997(para),Candidate_383_NC_003997(para)	-	-	-	-B.subtilis_sigG_2(8.01|-330)
Bacillus_anthracis_Ames	|	Candidate_664_NC_003997	|	BA4344		hypothetical protein	*	>>>	24	|	3964971	3965050	>>>	79	|	143	>>>	BA4345	Na+/H+ antiporter NhaC	*	candidate	264	1.4e-21	Z		6	RNA	Bacillus_cereus_ATCC_10987_chromosome<>Bacillus_cereus_ATCC14579_chromosome<>Bacillus_thuringiensis_konkukian_chromosome<>Bacillus_cereus_ZK_chromosome<>Bacillus_thuringiensis_Al_Hakam_chromosome<>Bacillus_cereus_cytotoxis_NVH_391-98_chromosome	NC_000964_T1box13(-)_-_(hom)|NC_002745_T1box7(-)_-_(hom)|NC_003210_T1box7(-)_-_(hom)|NC_002745_T1box8(-)_-_(hom)	4	T-box_NC_003997(para),T-box_NC_003997(para),T-box_NC_003997(para),T-box_NC_003997(para)	-	-	-	-
Bacillus_anthracis_Ames	|	Candidate_665_NC_003997	|	BA4381		cell division protein, FtsW/RodA/SpoVE family	*	<<<	19	|	3995013	3995334	>>>	321	|	0	<<<	BA4382	dihydrolipoamide acetyltransferase	*	candidate	1588	5.3e-66	X		5	RNA	Bacillus_cereus_ATCC_10987_chromosome<>Bacillus_thuringiensis_konkukian_chromosome<>Bacillus_cereus_ZK_chromosome<>Bacillus_thuringiensis_Al_Hakam_chromosome<>Bacillus_cereus_cytotoxis_NVH_391-98_chromosome	NC_002745_sprC(-)_-_(hom|rev)	0	-	-	-	-	-
Bacillus_anthracis_Ames	|	Candidate_724_NC_003997	|	BA0579		malate dehydrogenase, putative	*	>>>	3	|	589687	589959	<<<	272	|	19	<<<	BA0580	lipoprotein, putative	*	candidate	561	1.1e-19	Z		5	RNA	Bacillus_cereus_ATCC_10987_chromosome<>Bacillus_cereus_ATCC14579_chromosome<>Bacillus_thuringiensis_konkukian_chromosome<>Bacillus_cereus_ZK_chromosome<>Bacillus_thuringiensis_Al_Hakam_chromosome	NC_002745_T1box4(+)_+_(hom)	2	Candidate_143_NC_003997(para),Candidate_212_NC_003997(para)	-	-	-	-B.subtilis_sigG_2(9.09|-323)
Bacillus_anthracis_Ames	|	Candidate_734_NC_003997	|	BA0949		protein-export membrane protein-related protein	*	>>>	1	|	954998	955276	>>>	278	|	67	<<<	BA0950	hypothetical protein	*	candidate	1580	1.2e-65	Z		5	RNA	Bacillus_cereus_ATCC_10987_chromosome<>Bacillus_cereus_ATCC14579_chromosome<>Bacillus_thuringiensis_konkukian_chromosome<>Bacillus_cereus_ZK_chromosome<>Bacillus_thuringiensis_Al_Hakam_chromosome	NC_002505_B2(-)_-_(hom|rev)	2	Candidate_227_NC_003997(anti),Candidate_735_NC_003997(para),Candidate_229_NC_003997(para)	-	-	-	-B.subtilis_sigG_1(8.21|-181)
Bacillus_anthracis_Ames	|	Purine_NC_003997	|	BA0268		bifunctional GMP synthase/glutamine	*	>>>	19	|	262466	262758	>>>	292	|	72	>>>	BA0270	xanthine/uracil permease family protein	*	Purine	1156	1.5e-46	R		5	RNA	Bacillus_cereus_ATCC14579_chromosome<>Bacillus_thuringiensis_konkukian_chromosome<>Bacillus_cereus_ZK_chromosome<>Bacillus_thuringiensis_Al_Hakam_chromosome<>Bacillus_cereus_cytotoxis_NVH_391-98_chromosome	NC_000964_Purine4(-)_-_(hom)|NC_000964_Purine2(+)_+_(hom)|NC_000964_Purine3(+)_+_(hom)|NC_000964_Purine5(+)_+_(hom)|NC_003210_Purine2(-)_-_(hom)|NC_002745_Purine(+)_+_(hom)	1	Purine_NC_003997(para)	Purine2_NC_000964|UD(5'(0-0)|3'(0-0)),Purine1_NC_003210|3'(0),Purine2_NC_003210|3'(0),Purine4_NC_000964|3'(0),Purine_NC_002745|3'(0)	5	RS	-B.subtilis_sigG_3(9.3|-142)B.subtilis_sigA_2(9.46|-174)
Bacillus_anthracis_Ames	|	TPP_NC_003997	|	BA0724		peptidase, M23/M37 family	*	<<<	1	|	751830	752248	>>>	418	|	210	>>>	BA0725	transcriptional activator TenA, putative	*	TPP	152	1.6e-17	R		5	RNA	Bacillus_cereus_ATCC_10987_chromosome<>Bacillus_thuringiensis_konkukian_chromosome<>Bacillus_cereus_ZK_chromosome<>Bacillus_thuringiensis_Al_Hakam_chromosome<>Bacillus_cereus_cytotoxis_NVH_391-98_chromosome	NC_002745_THI1(-)_-_(hom)|NC_000913_THI1(-)_-_(hom)	2	TPP_NC_003997(para),TPP_NC_003997(para)	THI2_NC_000964|3'(0),THI1_NC_000964|3'(0),THI1_NC_002505|3'(0),THI2_NC_000913|3'(0),THI_NC_002516|3'(0),THI1_NC_003112|3'(0),THI_NC_005072|3'(0)	-	-	-
Bacillus_anthracis_Ames	|	FMN_NC_003997	|	BA1501		hypothetical protein	*	<<<	2	|	1422319	1422786	>>>	467	|	79	>>>	BA1502	hypothetical protein	*	FMN	658	3.2e-24	R		8	RNA	Bacillus_cereus_ATCC_10987_chromosome<>Bacillus_cereus_ATCC14579_chromosome<>Bacillus_thuringiensis_konkukian_chromosome<>Bacillus_licheniformis_ATCC_14580_chromosome<>Bacillus_cereus_ZK_chromosome<>Bacillus_licheniformis_DSM_13_chromosome<>Bacillus_thuringiensis_Al_Hakam_chromosome<>Bacillus_cereus_cytotoxis_NVH_391-98_chromosome	NC_002745_RFN1(-)_-_(hom)|NC_000964_RFN2(-)_-_(hom)|NC_002745_RFN2(-)_-_(hom)|NC_003210_RFN(-)_-_(hom)	1	Candidate_663_NC_003997(para)	RFN1_NC_000964|3'(0)	5	RS	-B.subtilis_sigA_2(11.28|-242)
Bacillus_anthracis_Ames	|	SAM_NC_003997	|	BA2639		aspartate racemase family protein	*	<<<	135	|	2459342	2459520	>>>	178	|	94	>>>	BA2640	hypothetical protein	*	SAM	1289	2e-52	R		5	RNA	Bacillus_cereus_ATCC_10987_chromosome<>Bacillus_cereus_ATCC14579_chromosome<>Bacillus_thuringiensis_konkukian_chromosome<>Bacillus_cereus_ZK_chromosome<>Bacillus_thuringiensis_Al_Hakam_chromosome	NC_000964_S_box2(+)_+_(hom)|NC_003210_S_box7(-)_-_(hom)|NC_000964_S_box10(+)_+_(hom)|NC_003210_S_box2(-)_-_(hom)|NC_003210_S_box5(-)_-_(hom)|NC_000964_S_box7(-)_-_(hom)|NC_000964_S_box11(+)_+_(hom)|NC_003210_S_box3(-)_-_(hom)|NC_000964_S_box9(-)_-_(hom)|NC_002745_S_box4(-)_-_(hom)|NC_000964_S_box8(-)_-_(hom)	9	Candidate_110_NC_003997(anti),Candidate_97_NC_003997(para),SAM_NC_003997(para),SAM_NC_003997(para),SAM_NC_003997(para),SAM_NC_003997(para),SAM_NC_003997(para),Candidate_25_NC_003997(para),SAM_NC_003997(para),SAM_NC_003997(para)	S_box2_NC_003210|UD(5'(1-1)|3'(0-0)),S_box4_NC_000964|UD(5'(1-1)|3'(0-0)),S_box5_NC_000964|UD(5'(1-1)|3'(0-1)),S_box9_NC_000964|UD(5'(1-1)|3'(0-0)),S_box4_NC_002745|3'(0),S_box1_NC_000964|3'(0),S_box2_NC_000964|3'(0),T1box2_NC_002745|3'(0),S_box3_NC_003210|3'(0),S_box7_NC_003210|3'(0),S_box2_NC_002745|3'(0)	-	RS	-
Bacillus_anthracis_Ames	|	SAM_NC_003997	|	BA4479		bifunctional homocysteine	*	<<<	317	|	4074218	4074433	>>>	215	|	53	>>>	BA4480	cystathionine beta-lyase	*	SAM	1222	2.2e-49	R		1	RNA	Bacillus_cereus_ATCC14579_chromosome	NC_003210_S_box3(-)_-_(hom)|NC_000964_S_box1(-)_-_(hom)|NC_003210_S_box6(-)_-_(hom)|NC_002745_S_box2(+)_+_(hom)|NC_000964_S_box2(+)_+_(hom)|NC_003210_S_box2(-)_-_(hom)|NC_000964_S_box11(+)_+_(hom)|NC_000964_S_box7(-)_-_(hom)|NC_000964_S_box10(+)_+_(hom)|NC_002745_S_box4(-)_-_(hom)|NC_003210_S_box5(-)_-_(hom)|NC_003210_S_box3(-)_-_(hom|rev)|NC_000964_S_box9(-)_-_(hom)|NC_000964_S_box1(-)_-_(hom|re…	8	Candidate_62_NC_003997(tandem),Candidate_97_NC_003997(anti),SAM_NC_003997(anti),SAM_NC_003997(para),Candidate_110_NC_003997(para),SAM_NC_003997(para),Candidate_25_NC_003997(para),SAM_NC_003997(para),SAM_NC_003997(para),SAM_NC_003997(para)	S_box2_NC_003210|UD(5'(1-1)|3'(0-0)),S_box4_NC_000964|UD(5'(1-1)|3'(0-0)),S_box5_NC_000964|UD(5'(1-1)|3'(0-1)),S_box9_NC_000964|UD(5'(1-1)|3'(0-0)),S_box4_NC_002745|3'(0),S_box1_NC_000964|3'(0),S_box2_NC_000964|3'(0),T1box2_NC_002745|3'(0),S_box3_NC_003210|3'(0),S_box7_NC_003210|3'(0),S_box2_NC_002745|3'(0)	5	RS	-B.subtilis_sigG_3(8.3|-228)
Bacillus_anthracis_Ames	|	T-box_NC_003997	|	BA3408		tryptophanyl-tRNA synthetase	*	<<<	29	|	3133275	3133360	<<<	85	|	275	>>>	BA3409	1-deoxy-D-xylulose 5-phosphate reductoisomerase	*	T-box	200	5.3e-17	R		5	RNA	Bacillus_cereus_ATCC_10987_chromosome<>Bacillus_cereus_ATCC14579_chromosome<>Bacillus_thuringiensis_konkukian_chromosome<>Bacillus_cereus_ZK_chromosome<>Bacillus_thuringiensis_Al_Hakam_chromosome	NC_000964_T1box1(+)_+_(hom)|NC_000964_T1box13(-)_-_(hom)|NC_000964_T1box14(-)_-_(hom)|NC_003210_T1box1(+)_+_(hom)|NC_003210_T1box5(-)_-_(hom)|NC_000964_T1box2(+)_+_(hom)|NC_000964_T1box4(+)_+_(hom)|NC_000964_T1box18(+)_+_(hom)|NC_000964_T1box6(+)_+_(hom)|NC_002745_T1box4(+)_+_(hom)|NC_002745_T1box7(-)_-_(hom)|NC_003210_T1box9(-)_-_(hom)|NC_000964_T1box8(-)_-_(hom)|NC_003210_T1box10(-)_-_(hom)	7	T-box_NC_003997(para),T-box_NC_003997(para),T-box_NC_003997(para),T-box_NC_003997(para),T-box_NC_003997(para),T-box_NC_003997(para),T-box_NC_003997(para)	T1box3_NC_000964|UD(5'(1-1)|3'(0-0)),T1box12_NC_003210|UD(5'(1-1)|3'(0-0)),T1box7_NC_003210|UD(5'(1-1)|3'(0-0)),T1box5_NC_000964|UD(5'(0-0)|3'(0-0)),T1box4_NC_002745|UD(5'(0-0)|3'(0-0)),T1box8_NC_000964|UD(5'(1-1)|3'(0-0)),T1box10_NC_000964|UD(5'(0-0)|3'(1-1)),Lysine2_NC_002745|UD(5'(1-1)|3'(1-1)),T1box12_NC_000964|UD(5'(0-0)|3'(0-0)),T1box6_NC_003210|UD(5'(1-0)|3'(0-0)),T1box8_NC_002745|UD(5'(1-…	5	RS	-
Bacillus_anthracis_Ames	|	SRP_bact_NC_003997	|	BA0018		cytidine/deoxycytidylate deaminase zinc-binding	*	>>>	81	|	25117	25428	>>>	311	|	83	>>>	BA0019	DNA polymerase III subunits gamma and tau	*	SRP_bact	825	1.1e-31	B		58	RNA	Bacillus_subtilis_chromosome<>Bacillus_halodurans_chromosome<>Staphylococcus_aureus_N315_chromosome<>Staphylococcus_aureus_Mu50_chromosome<>Staphylococcus_aureus_COL_chromosome<>Staphylococcus_aureus_aureus_MRSA252_chromosome<>Staphylococcus_aureus_aureus_MSSA476_chromosome<>Listeria_monocytogenes_4b_F2365_chromosome<>Staphylococcus_epidermidis_RP62A_chromosome<>Clostridium_acetobutylicum_chromos…	NC_000964_SRP_bact(+)_+_(hom)|NC_002745_SRP_bact(+)_+_(hom)|NC_003210_SRP_bact(-)_-_(hom)|NC_002516_SRP_bact(+)_+_(hom)|NC_000913_ffs_SRP(+)_+_(hom)|NC_002505_SRP_bact(+)_+_(hom)|NC_003047_SRP_bact(+)_+_(hom)	0	-	SRP_bact_NC_000964|UD(5'(0-0)|3'(0-0)),SRP_bact_NC_003047|3'(0)	-	-	-
Bacillus_anthracis_Ames	|	SAM_NC_003997	|	BA0195		oligopeptide ABC transporter,	*	<<<	54	|	197003	197338	<<<	335	|	1	<<<	BA0196	oxidoreductase, aldo/keto reductase family	*	SAM	1739	6.7e-73	T		5	RNA	Bacillus_cereus_ATCC_10987_chromosome<>Bacillus_cereus_ATCC14579_chromosome<>Bacillus_thuringiensis_konkukian_chromosome<>Bacillus_cereus_ZK_chromosome<>Bacillus_thuringiensis_Al_Hakam_chromosome	NC_003210_S_box6(-)_-_(hom)|NC_000964_S_box9(-)_-_(hom)|NC_003210_S_box3(-)_-_(hom)|NC_000964_S_box2(+)_+_(hom)|NC_000964_S_box11(+)_+_(hom)|NC_000964_S_box7(-)_-_(hom)|NC_002745_S_box4(-)_-_(hom)|NC_000964_S_box10(+)_+_(hom)|NC_002745_S_box3(-)_-_(hom)|NC_003210_S_box2(-)_-_(hom)|NC_000964_S_box1(-)_-_(hom)	10	Candidate_25_NC_003997(para),SAM_NC_003997(para),SAM_NC_003997(para),SAM_NC_003997(para),SAM_NC_003997(para),SAM_NC_003997(para),SAM_NC_003997(para),SAM_NC_003997(para),Candidate_110_NC_003997(para),SAM_NC_003997(para)	S_box2_NC_003210|UD(5'(1-1)|3'(0-0)),S_box4_NC_000964|UD(5'(1-1)|3'(0-0)),S_box5_NC_000964|UD(5'(1-1)|3'(0-1)),S_box9_NC_000964|UD(5'(1-1)|3'(0-0)),S_box4_NC_002745|3'(0),S_box1_NC_000964|3'(0),S_box2_NC_000964|3'(0),T1box2_NC_002745|3'(0),S_box3_NC_003210|3'(0),S_box7_NC_003210|3'(0),S_box2_NC_002745|3'(0)	-	RS	-B.subtilis_sigA_2(10.07|-234)
Bacillus_anthracis_Ames	|	Purine_NC_003997	|	BA0267		chaperonin GroEL	*	>>>	30	|	260531	260833	>>>	302	|	74	>>>	BA0268	bifunctional GMP synthase/glutamine	*	Purine	1383	7.2e-57	T		6	RNA	Bacillus_cereus_ATCC_10987_chromosome<>Bacillus_cereus_ATCC14579_chromosome<>Bacillus_thuringiensis_konkukian_chromosome<>Bacillus_cereus_ZK_chromosome<>Bacillus_thuringiensis_Al_Hakam_chromosome<>Bacillus_cereus_cytotoxis_NVH_391-98_chromosome	NC_003210_Purine2(-)_-_(hom)	0	-	Purine2_NC_000964|UD(5'(0-0)|3'(0-0)),Purine1_NC_003210|3'(0),Purine2_NC_003210|3'(0),Purine4_NC_000964|3'(0),Purine_NC_002745|3'(0)	5	-	-
Bacillus_anthracis_Ames	|	TPP_NC_003997	|	BA0379		methyl-accepting chemotaxis protein	*	>>>	10	|	399268	399484	>>>	216	|	36	>>>	BA0380	hypothetical protein	*	TPP	1161	1.3e-46	B		6	RNA	Bacillus_cereus_ATCC_10987_chromosome<>Bacillus_cereus_ATCC14579_chromosome<>Bacillus_thuringiensis_konkukian_chromosome<>Bacillus_cereus_ZK_chromosome<>Bacillus_thuringiensis_Al_Hakam_chromosome<>Bacillus_cereus_cytotoxis_NVH_391-98_chromosome	NC_000913_THI1(-)_-_(hom)|NC_000964_THI3(-)_-_(hom)|NC_000964_THI4(+)_+_(hom)|NC_003047_THI(+)_+_(hom)|NC_000964_THI1(+)_+_(hom)	3	TPP_NC_003997(para),TPP_NC_003997(para),TPP_NC_003997(para)	THI2_NC_000964|3'(0),THI1_NC_000964|3'(0),THI1_NC_002505|3'(0),THI2_NC_000913|3'(0),THI_NC_002516|3'(0),THI1_NC_003112|3'(0),THI_NC_005072|3'(0)	5	RS	-
Bacillus_anthracis_Ames	|	ydaO-yuaA_NC_003997	|	BA0737		hypothetical protein	*	>>>	8	|	761315	761606	>>>	291	|	45	>>>	BA0738	hypothetical protein	*	ydaO-yuaA	1243	8.5e-51	B		6	RNA	Bacillus_cereus_ATCC_10987_chromosome<>Bacillus_cereus_ATCC14579_chromosome<>Bacillus_thuringiensis_konkukian_chromosome<>Bacillus_cereus_ZK_chromosome<>Bacillus_thuringiensis_Al_Hakam_chromosome<>Bacillus_cereus_cytotoxis_NVH_391-98_chromosome	NC_000964_ydaO1yuaA1(+)_+_(hom)|NC_000964_ydaO1yuaA2(+)_+_(hom)	0	-	-	5	-	-
Bacillus_anthracis_Ames	|	T-box_NC_003997	|	BA1188		tryptophanyl-tRNA synthetase	*	<<<	49	|	1152338	1152599	<<<	261	|	86	<<<	BA1189	hypothetical protein	*	T-box	524	2.7e-18	T		10	RNA	Bacillus_subtilis_chromosome<>Bacillus_cereus_ATCC_10987_chromosome<>Bacillus_cereus_ATCC14579_chromosome<>Bacillus_thuringiensis_konkukian_chromosome<>Bacillus_licheniformis_ATCC_14580_chromosome<>Bacillus_cereus_ZK_chromosome<>Bacillus_licheniformis_DSM_13_chromosome<>Bacillus_thuringiensis_Al_Hakam_chromosome<>Bacillus_cereus_cytotoxis_NVH_391-98_chromosome<>Bacillus_amyloliquefaciens_FZB42_ch…	NC_000964_T1box3(-)_-_(hom)|NC_002745_T1box1(+)_+_(hom)|NC_002745_T1box4(+)_+_(hom)|NC_000964_T1box5(+)_+_(hom)|NC_003210_T1box4(-)_-_(hom)|NC_000964_T1box8(-)_-_(hom)|NC_000964_T1box14(-)_-_(hom)|NC_003210_T1box1(+)_+_(hom)|NC_002745_T1box8(-)_-_(hom)|NC_000964_T1box6(+)_+_(hom)	7	T-box_NC_003997(para),T-box_NC_003997(para),T-box_NC_003997(para),Candidate_581_NC_003997(para),T-box_NC_003997(para),T-box_NC_003997(para),T-box_NC_003997(para)	T1box3_NC_000964|UD(5'(1-1)|3'(0-0)),T1box12_NC_003210|UD(5'(1-1)|3'(0-0)),T1box7_NC_003210|UD(5'(1-1)|3'(0-0)),T1box5_NC_000964|UD(5'(0-0)|3'(0-0)),T1box4_NC_002745|UD(5'(0-0)|3'(0-0)),T1box8_NC_000964|UD(5'(1-1)|3'(0-0)),T1box10_NC_000964|UD(5'(0-0)|3'(1-1)),Lysine2_NC_002745|UD(5'(1-1)|3'(1-1)),T1box12_NC_000964|UD(5'(0-0)|3'(0-0)),T1box6_NC_003210|UD(5'(1-0)|3'(0-0)),T1box8_NC_002745|UD(5'(1-…	-	RS	-B.subtilis_sigA_1(10.48|-319)
Bacillus_anthracis_Ames	|	T-box_NC_003997	|	BA1247		hypothetical protein	*	>>>	1	|	1202650	1202735	>>>	85	|	319	>>>	BA1248	anthranilate synthase component I	*	T-box	1114	2.4e-45	T		6	RNA	Oceanobacillus_iheyensis_chromosome<>Bacillus_cereus_ATCC14579_chromosome<>Bacillus_thuringiensis_konkukian_chromosome<>Bacillus_cereus_ZK_chromosome<>Bacillus_thuringiensis_Al_Hakam_chromosome<>Bacillus_cereus_cytotoxis_NVH_391-98_chromosome	NC_003210_T1box8(-)_-_(hom)|NC_003210_T1box9(-)_-_(hom)|NC_003210_T1box12(+)_+_(hom)	3	T-box_NC_003997(tandem),T-box_NC_003997(para),T-box_NC_003997(para)	T1box3_NC_000964|UD(5'(1-1)|3'(0-0)),T1box12_NC_003210|UD(5'(1-1)|3'(0-0)),T1box7_NC_003210|UD(5'(1-1)|3'(0-0)),T1box5_NC_000964|UD(5'(0-0)|3'(0-0)),T1box4_NC_002745|UD(5'(0-0)|3'(0-0)),T1box8_NC_000964|UD(5'(1-1)|3'(0-0)),T1box10_NC_000964|UD(5'(0-0)|3'(1-1)),Lysine2_NC_002745|UD(5'(1-1)|3'(1-1)),T1box12_NC_000964|UD(5'(0-0)|3'(0-0)),T1box6_NC_003210|UD(5'(1-0)|3'(0-0)),T1box8_NC_002745|UD(5'(1-…	-	-	-
Bacillus_anthracis_Ames	|	T-box_NC_003997	|	BA1247		hypothetical protein	*	>>>	96	|	1202745	1203027	>>>	282	|	27	>>>	BA1248	anthranilate synthase component I	*	T-box	767	5e-29	T		6	RNA	Bacillus_cereus_ATCC_10987_chromosome<>Bacillus_cereus_ATCC14579_chromosome<>Bacillus_thuringiensis_konkukian_chromosome<>Bacillus_cereus_ZK_chromosome<>Bacillus_thuringiensis_Al_Hakam_chromosome<>Bacillus_cereus_cytotoxis_NVH_391-98_chromosome	NC_003210_T1box8(-)_-_(hom)|NC_003210_T1box9(-)_-_(hom)|NC_003210_T1box12(+)_+_(hom)	3	T-box_NC_003997(tandem),T-box_NC_003997(para),T-box_NC_003997(para)	T1box3_NC_000964|UD(5'(1-1)|3'(0-0)),T1box12_NC_003210|UD(5'(1-1)|3'(0-0)),T1box7_NC_003210|UD(5'(1-1)|3'(0-0)),T1box5_NC_000964|UD(5'(0-0)|3'(0-0)),T1box4_NC_002745|UD(5'(0-0)|3'(0-0)),T1box8_NC_000964|UD(5'(1-1)|3'(0-0)),T1box10_NC_000964|UD(5'(0-0)|3'(1-1)),Lysine2_NC_002745|UD(5'(1-1)|3'(1-1)),T1box12_NC_000964|UD(5'(0-0)|3'(0-0)),T1box6_NC_003210|UD(5'(1-0)|3'(0-0)),T1box8_NC_002745|UD(5'(1-…	5	RS	-
Bacillus_anthracis_Ames	|	T-box_NC_003997	|	BA1447		precorrin-2 dehydrogenase	*	>>>	4	|	1369594	1369928	>>>	334	|	82	>>>	BA1448	sodium-dependent transporter, putative	*	T-box	1584	6.2e-66	T		6	RNA	Bacillus_cereus_ATCC_10987_chromosome<>Bacillus_cereus_ATCC14579_chromosome<>Bacillus_thuringiensis_konkukian_chromosome<>Bacillus_cereus_ZK_chromosome<>Bacillus_thuringiensis_Al_Hakam_chromosome<>Bacillus_cereus_cytotoxis_NVH_391-98_chromosome	NC_003210_T1box11(-)_-_(hom)|NC_003210_T1box9(-)_-_(hom)|NC_003210_T1box7(-)_-_(hom)	3	T-box_NC_003997(para),T-box_NC_003997(para),T-box_NC_003997(para)	T1box3_NC_000964|UD(5'(1-1)|3'(0-0)),T1box12_NC_003210|UD(5'(1-1)|3'(0-0)),T1box7_NC_003210|UD(5'(1-1)|3'(0-0)),T1box5_NC_000964|UD(5'(0-0)|3'(0-0)),T1box4_NC_002745|UD(5'(0-0)|3'(0-0)),T1box8_NC_000964|UD(5'(1-1)|3'(0-0)),T1box10_NC_000964|UD(5'(0-0)|3'(1-1)),Lysine2_NC_002745|UD(5'(1-1)|3'(1-1)),T1box12_NC_000964|UD(5'(0-0)|3'(0-0)),T1box6_NC_003210|UD(5'(1-0)|3'(0-0)),T1box8_NC_002745|UD(5'(1-…	-	RS	-B.subtilis_sigA_2(11.28|-295)
Bacillus_anthracis_Ames	|	SAM_NC_003997	|	BA1451		hypothetical protein	*	>>>	1	|	1375232	1375509	>>>	277	|	42	>>>	BA1452	Na+/H+ antiporter family protein	*	SAM	1305	4e-53	B		4	RNA	Bacillus_cereus_ATCC14579_chromosome<>Bacillus_thuringiensis_konkukian_chromosome<>Bacillus_cereus_ZK_chromosome<>Bacillus_thuringiensis_Al_Hakam_chromosome	NC_000964_S_box11(+)_+_(hom)|NC_000964_S_box7(-)_-_(hom)|NC_000964_S_box9(-)_-_(hom)|NC_000964_S_box10(+)_+_(hom)|NC_003210_S_box3(-)_-_(hom)|NC_003210_S_box6(-)_-_(hom)|NC_000964_S_box2(+)_+_(hom)|NC_000964_S_box1(-)_-_(hom)|NC_002745_S_box4(-)_-_(hom)|NC_003210_S_box4(+)_+_(hom)|NC_003210_S_box2(-)_-_(hom)	7	Candidate_25_NC_003997(para),SAM_NC_003997(para),SAM_NC_003997(para),Candidate_97_NC_003997(para),SAM_NC_003997(para),SAM_NC_003997(para),SAM_NC_003997(para)	S_box2_NC_003210|UD(5'(1-1)|3'(0-0)),S_box4_NC_000964|UD(5'(1-1)|3'(0-0)),S_box5_NC_000964|UD(5'(1-1)|3'(0-1)),S_box9_NC_000964|UD(5'(1-1)|3'(0-0)),S_box4_NC_002745|3'(0),S_box1_NC_000964|3'(0),S_box2_NC_000964|3'(0),T1box2_NC_002745|3'(0),S_box3_NC_003210|3'(0),S_box7_NC_003210|3'(0),S_box2_NC_002745|3'(0)	5	RS	-B.subtilis_sigA_2(9.27|-196)
Bacillus_anthracis_Ames	|	Purine_NC_003997	|	BA1590		methionine aminopeptidase	*	>>>	141	|	1497596	1497755	>>>	159	|	24	>>>	BA1591	xanthine phosphoribosyltransferase	*	Purine	915	2.3e-35	T		6	RNA	Bacillus_cereus_ATCC_10987_chromosome<>Bacillus_cereus_ATCC14579_chromosome<>Bacillus_thuringiensis_konkukian_chromosome<>Bacillus_cereus_ZK_chromosome<>Bacillus_thuringiensis_Al_Hakam_chromosome<>Bacillus_cereus_cytotoxis_NVH_391-98_chromosome	NC_000964_Purine4(-)_-_(hom)|NC_002745_Purine(+)_+_(hom)|NC_000964_Purine3(+)_+_(hom)|NC_003210_Purine2(-)_-_(hom)	1	Purine_NC_003997(para)	Purine2_NC_000964|UD(5'(0-0)|3'(0-0)),Purine1_NC_003210|3'(0),Purine2_NC_003210|3'(0),Purine4_NC_000964|3'(0),Purine_NC_002745|3'(0)	5	RS	-B.subtilis_sigA_1(9.26|-193)B.subtilis_sigA_2(10.32|-193)
Bacillus_anthracis_Ames	|	ykoK_NC_003997	|	BA1603		hypothetical protein	*	>>>	146	|	1510363	1510642	>>>	279	|	266	>>>	BA1605	cation transporter, putative	*	ykoK	474	9.8e-16	T		18	RNA	Bacillus_subtilis_chromosome<>Bacillus_halodurans_chromosome<>Clostridium_acetobutylicum_chromosome<>Listeria_innocua_chromosome<>Bacillus_cereus_ATCC_10987_chromosome<>Bacillus_cereus_ATCC14579_chromosome<>Bacillus_thuringiensis_konkukian_chromosome<>Bacillus_licheniformis_ATCC_14580_chromosome<>Bacillus_cereus_ZK_chromosome<>Bacillus_licheniformis_DSM_13_chromosome<>Bacillus_clausii_KSM-K16_chr…	NC_000964_ykoK(+)_+_(hom)|NC_003210_ykoK(-)_-_(hom)|NC_002505_ykoK(+)_+_(hom)	0	Candidate_127_NC_003997(anti)	-	-	-	-
Bacillus_anthracis_Ames	|	T-box_NC_003997	|	BA1965		hypothetical protein	*	>>>	220	|	1849896	1850159	>>>	263	|	479	>>>	BA1968	homoserine dehydrogenase	*	T-box	536	1.8e-18	T		11	RNA	Bacillus_subtilis_chromosome<>Bacillus_halodurans_chromosome<>Bacillus_cereus_ATCC_10987_chromosome<>Bacillus_cereus_ATCC14579_chromosome<>Bacillus_thuringiensis_konkukian_chromosome<>Bacillus_cereus_ZK_chromosome<>Geobacillus_kaustophilus_HTA426_chromosome<>Bacillus_clausii_KSM-K16_chromosome<>Bacillus_thuringiensis_Al_Hakam_chromosome<>Geobacillus_thermodenitrificans_NG80-2_chromosome<>Bacillus…	NC_000964_T1box15(-)_-_(hom)|NC_000964_T1box16(-)_-_(hom)|NC_000964_T1box17(-)_-_(hom)|NC_000964_T1box12(-)_-_(hom)|NC_003210_T1box6(-)_-_(hom)	3	T-box_NC_003997(tandem),T-box_NC_003997(para),T-box_NC_003997(para)	T1box3_NC_000964|UD(5'(1-1)|3'(0-0)),T1box12_NC_003210|UD(5'(1-1)|3'(0-0)),T1box7_NC_003210|UD(5'(1-1)|3'(0-0)),T1box5_NC_000964|UD(5'(0-0)|3'(0-0)),T1box4_NC_002745|UD(5'(0-0)|3'(0-0)),T1box8_NC_000964|UD(5'(1-1)|3'(0-0)),T1box10_NC_000964|UD(5'(0-0)|3'(1-1)),Lysine2_NC_002745|UD(5'(1-1)|3'(1-1)),T1box12_NC_000964|UD(5'(0-0)|3'(0-0)),T1box6_NC_003210|UD(5'(1-0)|3'(0-0)),T1box8_NC_002745|UD(5'(1-…	-	-	-B.subtilis_sigA_2(10.06|-274)
Bacillus_anthracis_Ames	|	T-box_NC_003997	|	BA2215		hypothetical protein	*	>>>	102	|	2068987	2069288	>>>	301	|	90	>>>	BA2216	sodium-dependent transporter, putative	*	T-box	490	1.1e-16	T		8	RNA	Bacillus_cereus_ATCC_10987_chromosome<>Bacillus_cereus_ATCC14579_chromosome<>Bacillus_thuringiensis_konkukian_chromosome<>Bacillus_licheniformis_ATCC_14580_chromosome<>Bacillus_cereus_ZK_chromosome<>Bacillus_licheniformis_DSM_13_chromosome<>Bacillus_thuringiensis_Al_Hakam_chromosome<>Bacillus_cereus_cytotoxis_NVH_391-98_chromosome	NC_003210_T1box14(-)_-_(hom)|NC_000964_T1box11(-)_-_(hom)|NC_003210_T1box11(-)_-_(hom)|NC_002745_T1box2(-)_-_(hom)|NC_000964_T1box13(-)_-_(hom)|NC_003210_T1box13(+)_+_(hom)	2	Candidate_581_NC_003997(para),T-box_NC_003997(para)	T1box3_NC_000964|UD(5'(1-1)|3'(0-0)),T1box12_NC_003210|UD(5'(1-1)|3'(0-0)),T1box7_NC_003210|UD(5'(1-1)|3'(0-0)),T1box5_NC_000964|UD(5'(0-0)|3'(0-0)),T1box4_NC_002745|UD(5'(0-0)|3'(0-0)),T1box8_NC_000964|UD(5'(1-1)|3'(0-0)),T1box10_NC_000964|UD(5'(0-0)|3'(1-1)),Lysine2_NC_002745|UD(5'(1-1)|3'(1-1)),T1box12_NC_000964|UD(5'(0-0)|3'(0-0)),T1box6_NC_003210|UD(5'(1-0)|3'(0-0)),T1box8_NC_002745|UD(5'(1-…	-	RS	-B.subtilis_sigG_2(8.23|-377)B.subtilis_sigA_2(10.77|-310)
Bacillus_anthracis_Ames	|	Glycine_NC_003997	|	BA2381		sodium/alanine symporter family protein	*	<<<	25	|	2221414	2221832	<<<	418	|	0	<<<	BA2383	hypothetical protein	*	Glycine	2211	2.8e-94	T		4	RNA	Bacillus_cereus_ATCC14579_chromosome<>Bacillus_thuringiensis_konkukian_chromosome<>Bacillus_cereus_ZK_chromosome<>Bacillus_thuringiensis_Al_Hakam_chromosome	NC_002505_gcvT1(-)_-_(hom)	0	-	gcvT1_NC_002505|3'(0),gcvT2_NC_002505|3'(0)	5	-	-B.subtilis_sigG_2(8.56|-344)B.subtilis_sigA_2(10.28|-360)
Bacillus_anthracis_Ames	|	TPP_NC_003997	|	BA2610		D-alanylalanine synthetase	*	>>>	22	|	2433541	2433755	>>>	214	|	64	>>>	BA2611	transcriptional activator TenA	*	TPP	486	3.2e-16	T		6	RNA	Bacillus_cereus_ATCC_10987_chromosome<>Bacillus_cereus_ATCC14579_chromosome<>Bacillus_thuringiensis_konkukian_chromosome<>Bacillus_cereus_ZK_chromosome<>Bacillus_thuringiensis_Al_Hakam_chromosome<>Bacillus_cereus_cytotoxis_NVH_391-98_chromosome	NC_000964_THI2(+)_+_(hom)|NC_000964_THI1(+)_+_(hom)|NC_003210_THI1(+)_+_(hom)|NC_000964_THI4(+)_+_(hom)|NC_000913_THI1(-)_-_(hom)	3	TPP_NC_003997(para),TPP_NC_003997(para),TPP_NC_003997(para)	THI2_NC_000964|3'(0),THI1_NC_000964|3'(0),THI1_NC_002505|3'(0),THI2_NC_000913|3'(0),THI_NC_002516|3'(0),THI1_NC_003112|3'(0),THI_NC_005072|3'(0)	5	RS	-B.subtilis_sigK_3(10.07|-177)B.subtilis_sigG_3(9.39|-169)B.subtilis_sigA_1(10.93|-187)
Bacillus_anthracis_Ames	|	T-box_NC_003997	|	BA2648		penicillin-binding protein	*	>>>	187	|	2469701	2470010	>>>	309	|	37	>>>	BA2649	permease, putative	*	T-box	774	1.9e-29	T		6	RNA	Bacillus_cereus_ATCC_10987_chromosome<>Bacillus_cereus_ATCC14579_chromosome<>Bacillus_thuringiensis_konkukian_chromosome<>Bacillus_cereus_ZK_chromosome<>Bacillus_clausii_KSM-K16_chromosome<>Bacillus_thuringiensis_Al_Hakam_chromosome	NC_000964_T1box9(-)_-_(hom)|NC_003210_T1box5(-)_-_(hom)|NC_003210_T1box12(+)_+_(hom)|NC_003210_T1box8(-)_-_(hom)|NC_003210_T1box13(+)_+_(hom)|NC_000964_T1box7(-)_-_(hom)	2	T-box_NC_003997(para),Candidate_581_NC_003997(para)	T1box3_NC_000964|UD(5'(1-1)|3'(0-0)),T1box12_NC_003210|UD(5'(1-1)|3'(0-0)),T1box7_NC_003210|UD(5'(1-1)|3'(0-0)),T1box5_NC_000964|UD(5'(0-0)|3'(0-0)),T1box4_NC_002745|UD(5'(0-0)|3'(0-0)),T1box8_NC_000964|UD(5'(1-1)|3'(0-0)),T1box10_NC_000964|UD(5'(0-0)|3'(1-1)),Lysine2_NC_002745|UD(5'(1-1)|3'(1-1)),T1box12_NC_000964|UD(5'(0-0)|3'(0-0)),T1box6_NC_003210|UD(5'(1-0)|3'(0-0)),T1box8_NC_002745|UD(5'(1-…	5	RS	-
Bacillus_anthracis_Ames	|	SAM_NC_003997	|	BA3206		peptidase, M20/M25/M40 family	*	<<<	26	|	2953065	2953303	<<<	238	|	0	<<<	BA3207	hypothetical protein	*	SAM	1012	6.6e-40	B		6	RNA	Bacillus_cereus_ATCC_10987_chromosome<>Bacillus_cereus_ATCC14579_chromosome<>Bacillus_thuringiensis_konkukian_chromosome<>Bacillus_cereus_ZK_chromosome<>Bacillus_thuringiensis_Al_Hakam_chromosome<>Bacillus_cereus_cytotoxis_NVH_391-98_chromosome	NC_000964_S_box7(-)_-_(hom)|NC_003210_S_box3(-)_-_(hom)|NC_000964_S_box2(+)_+_(hom)|NC_000964_S_box10(+)_+_(hom)|NC_000964_S_box9(-)_-_(hom)|NC_003210_S_box6(-)_-_(hom)|NC_002745_S_box3(-)_-_(hom)|NC_000964_S_box11(+)_+_(hom)|NC_002745_S_box4(-)_-_(hom)|NC_000964_S_box1(-)_-_(hom)|NC_000964_S_box8(-)_-_(hom)|NC_003210_S_box2(-)_-_(hom)	10	Candidate_25_NC_003997(anti),SAM_NC_003997(para),SAM_NC_003997(para),Candidate_97_NC_003997(para),SAM_NC_003997(para),SAM_NC_003997(para),SAM_NC_003997(para),SAM_NC_003997(para),SAM_NC_003997(para),Candidate_110_NC_003997(para),SAM_NC_003997(para)	S_box2_NC_003210|UD(5'(1-1)|3'(0-0)),S_box4_NC_000964|UD(5'(1-1)|3'(0-0)),S_box5_NC_000964|UD(5'(1-1)|3'(0-1)),S_box9_NC_000964|UD(5'(1-1)|3'(0-0)),S_box4_NC_002745|3'(0),S_box1_NC_000964|3'(0),S_box2_NC_000964|3'(0),T1box2_NC_002745|3'(0),S_box3_NC_003210|3'(0),S_box7_NC_003210|3'(0),S_box2_NC_002745|3'(0)	5	RS	-B.subtilis_sigA_2(10.05|-193)
Bacillus_anthracis_Ames	|	T-box_NC_003997	|	BA4034		isoleucyl-tRNA synthetase	*	<<<	48	|	3716099	3716397	<<<	298	|	0	<<<	BA4035	cell-division initiation protein DivIVA	*	T-box	1453	6.3e-60	T		6	RNA	Bacillus_cereus_ATCC_10987_chromosome<>Bacillus_cereus_ATCC14579_chromosome<>Bacillus_thuringiensis_konkukian_chromosome<>Bacillus_cereus_ZK_chromosome<>Bacillus_thuringiensis_Al_Hakam_chromosome<>Bacillus_cereus_cytotoxis_NVH_391-98_chromosome	NC_000964_T1box5(+)_+_(hom)|NC_003210_T1box1(+)_+_(hom)|NC_003210_T1box4(-)_-_(hom)|NC_000964_T1box14(-)_-_(hom)|NC_000964_T1box10(-)_-_(hom)|NC_002745_T1box7(-)_-_(hom)|NC_000964_T1box7(-)_-_(hom)|NC_000964_T1box18(+)_+_(hom)|NC_000964_T1box13(-)_-_(hom)|NC_002745_T1box8(-)_-_(hom)|NC_003210_T1box13(+)_+_(hom)	9	T-box_NC_003997(para),T-box_NC_003997(para),T-box_NC_003997(para),T-box_NC_003997(para),T-box_NC_003997(para),T-box_NC_003997(para),T-box_NC_003997(para),T-box_NC_003997(para),Candidate_581_NC_003997(para)	T1box3_NC_000964|UD(5'(1-1)|3'(0-0)),T1box12_NC_003210|UD(5'(1-1)|3'(0-0)),T1box7_NC_003210|UD(5'(1-1)|3'(0-0)),T1box5_NC_000964|UD(5'(0-0)|3'(0-0)),T1box4_NC_002745|UD(5'(0-0)|3'(0-0)),T1box8_NC_000964|UD(5'(1-1)|3'(0-0)),T1box10_NC_000964|UD(5'(0-0)|3'(1-1)),Lysine2_NC_002745|UD(5'(1-1)|3'(1-1)),T1box12_NC_000964|UD(5'(0-0)|3'(0-0)),T1box6_NC_003210|UD(5'(1-0)|3'(0-0)),T1box8_NC_002745|UD(5'(1-…	-	RS	-B.subtilis_sigA_2(10.84|-268)
Bacillus_anthracis_Ames	|	SAM_NC_003997	|	BA4252		5-methylthioribose kinase, putative	*	<<<	42	|	3890549	3890652	<<<	103	|	158	<<<	BA4253	hydrolase, carbon-nitrogen family	*	SAM	275	6.3e-19	B		7	RNA	Bacillus_subtilis_chromosome<>Bacillus_cereus_ATCC14579_chromosome<>Bacillus_thuringiensis_konkukian_chromosome<>Bacillus_cereus_ZK_chromosome<>Bacillus_thuringiensis_Al_Hakam_chromosome<>Geobacillus_thermodenitrificans_NG80-2_chromosome<>Bacillus_cereus_cytotoxis_NVH_391-98_chromosome	NC_000964_S_box4(-)_-_(hom)|NC_000964_S_box8(-)_-_(hom)|NC_003210_S_box2(-)_-_(hom)|NC_003210_S_box3(-)_-_(hom)	2	Candidate_62_NC_003997(para),SAM_NC_003997(para)	S_box2_NC_003210|UD(5'(1-1)|3'(0-0)),S_box4_NC_000964|UD(5'(1-1)|3'(0-0)),S_box5_NC_000964|UD(5'(1-1)|3'(0-1)),S_box9_NC_000964|UD(5'(1-1)|3'(0-0)),S_box4_NC_002745|3'(0),S_box1_NC_000964|3'(0),S_box2_NC_000964|3'(0),T1box2_NC_002745|3'(0),S_box3_NC_003210|3'(0),S_box7_NC_003210|3'(0),S_box2_NC_002745|3'(0)	-	RS	-B.subtilis_sigG_1(8.05|-195)B.subtilis_sigA_3(10.32|-228)
Bacillus_anthracis_Ames	|	SAM_NC_003997	|	BA4254		hypothetical protein	*	>>>	16	|	3892883	3893079	>>>	196	|	23	>>>	BA4255	ribulose bisphosphate carboxylase, putative	*	SAM	943	1.1e-36	T		6	RNA	Bacillus_cereus_ATCC_10987_chromosome<>Bacillus_cereus_ATCC14579_chromosome<>Bacillus_thuringiensis_konkukian_chromosome<>Bacillus_cereus_ZK_chromosome<>Bacillus_thuringiensis_Al_Hakam_chromosome<>Bacillus_cereus_cytotoxis_NVH_391-98_chromosome	NC_000964_S_box5(+)_+_(hom)|NC_000964_S_box11(+)_+_(hom)|NC_000964_S_box9(-)_-_(hom)|NC_000964_S_box10(+)_+_(hom)|NC_003210_S_box6(-)_-_(hom)|NC_003210_S_box3(-)_-_(hom)|NC_002745_S_box2(+)_+_(hom)|NC_003210_S_box1(+)_+_(hom)|NC_000964_S_box7(-)_-_(hom)|NC_000964_S_box1(-)_-_(hom)	8	SAM_NC_003997(para),SAM_NC_003997(para),SAM_NC_003997(para),Candidate_97_NC_003997(para),SAM_NC_003997(para),SAM_NC_003997(para),SAM_NC_003997(para),SAM_NC_003997(para)	S_box2_NC_003210|UD(5'(1-1)|3'(0-0)),S_box4_NC_000964|UD(5'(1-1)|3'(0-0)),S_box5_NC_000964|UD(5'(1-1)|3'(0-1)),S_box9_NC_000964|UD(5'(1-1)|3'(0-0)),S_box4_NC_002745|3'(0),S_box1_NC_000964|3'(0),S_box2_NC_000964|3'(0),T1box2_NC_002745|3'(0),S_box3_NC_003210|3'(0),S_box7_NC_003210|3'(0),S_box2_NC_002745|3'(0)	5	RS	-
Bacillus_anthracis_Ames	|	T-box_NC_003997	|	BA4633		histidyl-tRNA synthetase	*	<<<	41	|	4210681	4210944	<<<	263	|	49	<<<	BA4634	hypothetical protein	*	T-box	498	7.7e-17	T		9	RNA	Bacillus_subtilis_chromosome<>Bacillus_halodurans_chromosome<>Bacillus_cereus_ATCC_10987_chromosome<>Bacillus_cereus_ATCC14579_chromosome<>Bacillus_thuringiensis_konkukian_chromosome<>Bacillus_cereus_ZK_chromosome<>Geobacillus_kaustophilus_HTA426_chromosome<>Geobacillus_thermodenitrificans_NG80-2_chromosome<>Bacillus_cereus_cytotoxis_NVH_391-98_chromosome	NC_000964_T1box9(-)_-_(hom)|NC_003210_T1box4(-)_-_(hom)|NC_000964_T1box13(-)_-_(hom)|NC_003210_T1box12(+)_+_(hom)|NC_000964_T1box7(-)_-_(hom)|NC_000964_T1box14(-)_-_(hom)	3	T-box_NC_003997(para),T-box_NC_003997(para),T-box_NC_003997(para)	T1box3_NC_000964|UD(5'(1-1)|3'(0-0)),T1box12_NC_003210|UD(5'(1-1)|3'(0-0)),T1box7_NC_003210|UD(5'(1-1)|3'(0-0)),T1box5_NC_000964|UD(5'(0-0)|3'(0-0)),T1box4_NC_002745|UD(5'(0-0)|3'(0-0)),T1box8_NC_000964|UD(5'(1-1)|3'(0-0)),T1box10_NC_000964|UD(5'(0-0)|3'(1-1)),Lysine2_NC_002745|UD(5'(1-1)|3'(1-1)),T1box12_NC_000964|UD(5'(0-0)|3'(0-0)),T1box6_NC_003210|UD(5'(1-0)|3'(0-0)),T1box8_NC_002745|UD(5'(1-…	-	RS	-B.subtilis_sigA_2(10.32|-279)
Bacillus_anthracis_Ames	|	T-box_NC_003997	|	BA4690		valyl-tRNA synthetase	*	<<<	19	|	4266173	4266453	<<<	280	|	95	<<<	BA4691	hypothetical protein	*	T-box	474	7.5e-16	B		7	RNA	Bacillus_cereus_ATCC_10987_chromosome<>Bacillus_cereus_ATCC14579_chromosome<>Bacillus_thuringiensis_konkukian_chromosome<>Bacillus_cereus_ZK_chromosome<>Geobacillus_kaustophilus_HTA426_chromosome<>Bacillus_thuringiensis_Al_Hakam_chromosome<>Bacillus_cereus_cytotoxis_NVH_391-98_chromosome	NC_000964_T1box13(-)_-_(hom)|NC_003210_T1box5(-)_-_(hom)|NC_003210_T1box1(+)_+_(hom)|NC_000964_T1box5(+)_+_(hom)|NC_002745_T1box4(+)_+_(hom)|NC_002745_T1box7(-)_-_(hom)|NC_000964_T1box2(+)_+_(hom)|NC_000964_T1box10(-)_-_(hom)|NC_002745_T1box1(+)_+_(hom)|NC_002745_T1box2(-)_-_(hom)	7	T-box_NC_003997(para),T-box_NC_003997(para),T-box_NC_003997(para),T-box_NC_003997(para),T-box_NC_003997(para),T-box_NC_003997(para),Candidate_581_NC_003997(para)	T1box3_NC_000964|UD(5'(1-1)|3'(0-0)),T1box12_NC_003210|UD(5'(1-1)|3'(0-0)),T1box7_NC_003210|UD(5'(1-1)|3'(0-0)),T1box5_NC_000964|UD(5'(0-0)|3'(0-0)),T1box4_NC_002745|UD(5'(0-0)|3'(0-0)),T1box8_NC_000964|UD(5'(1-1)|3'(0-0)),T1box10_NC_000964|UD(5'(0-0)|3'(1-1)),Lysine2_NC_002745|UD(5'(1-1)|3'(1-1)),T1box12_NC_000964|UD(5'(0-0)|3'(0-0)),T1box6_NC_003210|UD(5'(1-0)|3'(0-0)),T1box8_NC_002745|UD(5'(1-…	5	RS	-
Bacillus_anthracis_Ames	|	T-box_NC_003997	|	BA4802		asparaginyl-tRNA synthetase	*	<<<	35	|	4365873	4366173	<<<	300	|	162	<<<	BA4803	phenylalanyl-tRNA synthetase beta subunit	*	T-box	563	6.6e-20	T		14	RNA	Bacillus_cereus_ATCC_10987_chromosome<>Clostridium_tetani_E88_chromosome<>Bacillus_cereus_ATCC14579_chromosome<>Bacillus_thuringiensis_konkukian_chromosome<>Bacillus_cereus_ZK_chromosome<>Pediococcus_pentosaceus_ATCC_25745_chromosome<>Bacillus_thuringiensis_Al_Hakam_chromosome<>Clostridium_botulinum_A_chromosome<>Alkaliphilus_metalliredigens_QYMF_chromosome<>Bacillus_cereus_cytotoxis_NVH_391-98_c…	NC_000964_T1box5(+)_+_(hom)|NC_000964_T1box18(+)_+_(hom)|NC_002745_T1box7(-)_-_(hom)|NC_003210_T1box5(-)_-_(hom)|NC_000964_T1box6(+)_+_(hom)|NC_000964_T1box13(-)_-_(hom)|NC_003210_T1box3(-)_-_(hom)|NC_002745_T1box2(-)_-_(hom)	6	Candidate_68_NC_003997(anti),Candidate_553_NC_003997(para),Candidate_684_NC_003997(para),Candidate_513_NC_003997(para),Candidate_701_NC_003997(para),Candidate_497_NC_003997(para),T-box_NC_003997(para)	T1box3_NC_000964|UD(5'(1-1)|3'(0-0)),T1box12_NC_003210|UD(5'(1-1)|3'(0-0)),T1box7_NC_003210|UD(5'(1-1)|3'(0-0)),T1box5_NC_000964|UD(5'(0-0)|3'(0-0)),T1box4_NC_002745|UD(5'(0-0)|3'(0-0)),T1box8_NC_000964|UD(5'(1-1)|3'(0-0)),T1box10_NC_000964|UD(5'(0-0)|3'(1-1)),Lysine2_NC_002745|UD(5'(1-1)|3'(1-1)),T1box12_NC_000964|UD(5'(0-0)|3'(0-0)),T1box6_NC_003210|UD(5'(1-0)|3'(0-0)),T1box8_NC_002745|UD(5'(1-…	-	RS	-
Bacillus_anthracis_Ames	|	SAM_NC_003997	|	BA5222		ABC transporter, ATP-binding protein	*	<<<	233	|	4739805	4740071	<<<	266	|	31	<<<	BA5224	hypothetical protein	*	SAM	418	1.8e-17	T		7	RNA	Bacillus_halodurans_chromosome<>Bacillus_cereus_ATCC_10987_chromosome<>Bacillus_cereus_ATCC14579_chromosome<>Bacillus_thuringiensis_konkukian_chromosome<>Bacillus_thuringiensis_Al_Hakam_chromosome<>Bacillus_cereus_cytotoxis_NVH_391-98_chromosome<>Bacillus_amyloliquefaciens_FZB42_chromosome	NC_000964_S_box9(-)_-_(hom)|NC_000964_S_box11(+)_+_(hom)|NC_003210_S_box2(-)_-_(hom)|NC_002745_S_box2(+)_+_(hom)|NC_000964_S_box6(+)_+_(hom)|NC_000964_S_box2(+)_+_(hom)|NC_000964_S_box10(+)_+_(hom)|NC_002745_S_box3(-)_-_(hom)|NC_003210_S_box3(-)_-_(hom)|NC_000964_S_box5(+)_+_(hom)|NC_003210_S_box1(+)_+_(hom)|NC_002745_S_box4(-)_-_(hom)|NC_000964_S_box7(-)_-_(hom)|NC_000964_S_box3(-)_-_(hom)	7	SAM_NC_003997(para),Candidate_25_NC_003997(para),SAM_NC_003997(para),Candidate_110_NC_003997(para),SAM_NC_003997(para),SAM_NC_003997(para),SAM_NC_003997(para)	S_box2_NC_003210|UD(5'(1-1)|3'(0-0)),S_box4_NC_000964|UD(5'(1-1)|3'(0-0)),S_box5_NC_000964|UD(5'(1-1)|3'(0-1)),S_box9_NC_000964|UD(5'(1-1)|3'(0-0)),S_box4_NC_002745|3'(0),S_box1_NC_000964|3'(0),S_box2_NC_000964|3'(0),T1box2_NC_002745|3'(0),S_box3_NC_003210|3'(0),S_box7_NC_003210|3'(0),S_box2_NC_002745|3'(0)	-	-	-B.subtilis_sigA_2(11.58|-235)
Bacillus_anthracis_Ames	|	tmRNA_NC_003997	|	BA5331		DNA-binding response regulator	*	<<<	329	|	4834305	4834647	<<<	342	|	216	<<<	BA5332	SsrA-binding protein	*	tmRNA	654	3.2e-24	T		9	RNA	Bacillus_subtilis_chromosome<>Oceanobacillus_iheyensis_chromosome<>Bacillus_licheniformis_ATCC_14580_chromosome<>Bacillus_licheniformis_DSM_13_chromosome<>Geobacillus_kaustophilus_HTA426_chromosome<>Staphylococcus_haemolyticus_chromosome<>Syntrophus_aciditrophicus_SB_chromosome<>Lactobacillus_reuteri_F275_chromosome<>Bacillus_amyloliquefaciens_FZB42_chromosome	NC_003210_tmRNA(-)_-_(hom)|NC_000964_tmRNA(-)_-_(hom)|NC_002745_tmRNA(+)_+_(hom)|NC_002516_tmRNA(-)_-_(hom)	0	-	-	-	-	-
Bacillus_anthracis_Ames	|	tmRNA_NC_003997	|	BA5331		DNA-binding response regulator	*	<<<	386	|	4834362	4834647	<<<	285	|	216	<<<	BA5332	SsrA-binding protein	*	tmRNA	654	3.2e-24	B		17	RNA	Bacillus_subtilis_chromosome<>Bacillus_halodurans_chromosome<>Listeria_monocytogenes_4b_F2365_chromosome<>Listeria_monocytogenes_chromosome<>Listeria_innocua_chromosome<>Oceanobacillus_iheyensis_chromosome<>Enterococcus_faecalis_V583_chromosome<>Bacillus_licheniformis_ATCC_14580_chromosome<>Bacillus_licheniformis_DSM_13_chromosome<>Geobacillus_kaustophilus_HTA426_chromosome<>Bacillus_clausii_KSM-…	NC_003210_tmRNA(-)_-_(hom)|NC_000964_tmRNA(-)_-_(hom)|NC_002745_tmRNA(+)_+_(hom)|NC_002516_tmRNA(-)_-_(hom)	0	-	-	-	-	-
Bacillus_anthracis_Ames	|	TPP_NC_003997	|	BA5463		thiamine biosynthesis protein ThiC	*	<<<	58	|	4953333	4953564	<<<	231	|	9	<<<	BA5464	L-lactate permease	*	TPP	1048	8.5e-42	T		6	RNA	Bacillus_cereus_ATCC_10987_chromosome<>Bacillus_cereus_ATCC14579_chromosome<>Bacillus_thuringiensis_konkukian_chromosome<>Bacillus_cereus_ZK_chromosome<>Bacillus_thuringiensis_Al_Hakam_chromosome<>Bacillus_cereus_cytotoxis_NVH_391-98_chromosome	NC_000964_THI1(+)_+_(hom)|NC_000964_THI2(+)_+_(hom)|NC_000964_THI4(+)_+_(hom)|NC_003210_THI1(+)_+_(hom)|NC_000913_THI1(-)_-_(hom)	3	TPP_NC_003997(para),TPP_NC_003997(para),TPP_NC_003997(para)	THI2_NC_000964|3'(0),THI1_NC_000964|3'(0),THI1_NC_002505|3'(0),THI2_NC_000913|3'(0),THI_NC_002516|3'(0),THI1_NC_003112|3'(0),THI_NC_005072|3'(0)	-	RS	-
Bacillus_anthracis_Ames	|	yybP-ykoY_NC_003997	|	BA1322		hypothetical protein	*	<<<	110	|	1269022	1269205	<<<	183	|	0	<<<	BA1323	potassium uptake protein, TrkH family	*	yybP-ykoY	1126	4.3e-45	Z		6	RNA	Bacillus_cereus_ATCC_10987_chromosome<>Bacillus_cereus_ATCC14579_chromosome<>Bacillus_thuringiensis_konkukian_chromosome<>Bacillus_cereus_ZK_chromosome<>Bacillus_thuringiensis_Al_Hakam_chromosome<>Bacillus_cereus_cytotoxis_NVH_391-98_chromosome	NC_003210_yybP1ykoY(+)_+_(hom)	0	-	yybP1ykoY_NC_003210|3'(0),yybP1ykoY1_NC_000964|3'(0),yybP1ykoY_NC_002745|3'(0)	-	-	-B.subtilis_sigA_2(12.5|-159)
Bacillus_anthracis_Ames	|	T-box_NC_003997	|	BA1459		branched-chain amino acid transport system II	*	<<<	38	|	1382511	1382832	<<<	321	|	227	>>>	BA1461	hypothetical protein	*	T-box	1375	2e-56	X		2	RNA	Clostridium_tetani_E88_chromosome<>Bacillus_cereus_cytotoxis_NVH_391-98_chromosome	NC_003210_T1box4(-)_-_(hom)|NC_000964_T1box1(+)_+_(hom)	4	Candidate_10_NC_003997(anti),Candidate_591_NC_003997(para),T-box_NC_003997(para),T-box_NC_003997(para),T-box_NC_003997(para)	T1box3_NC_000964|UD(5'(1-1)|3'(0-0)),T1box12_NC_003210|UD(5'(1-1)|3'(0-0)),T1box7_NC_003210|UD(5'(1-1)|3'(0-0)),T1box5_NC_000964|UD(5'(0-0)|3'(0-0)),T1box4_NC_002745|UD(5'(0-0)|3'(0-0)),T1box8_NC_000964|UD(5'(1-1)|3'(0-0)),T1box10_NC_000964|UD(5'(0-0)|3'(1-1)),Lysine2_NC_002745|UD(5'(1-1)|3'(1-1)),T1box12_NC_000964|UD(5'(0-0)|3'(0-0)),T1box6_NC_003210|UD(5'(1-0)|3'(0-0)),T1box8_NC_002745|UD(5'(1-…	-	RS	-B.subtilis_sigG_1(8.64|-325)B.subtilis_sigG_3(9.56|-325)
Bacillus_anthracis_Ames	|	RNaseP_bact_b_NC_003997	|	BA1583		hypothetical protein	*	>>>	459	|	1489424	1489500	>>>	76	|	122	>>>	BA1584	hypothetical protein	*	RNaseP_bact_b	141	3.9e-35	Z		35	RNA	Bacillus_halodurans_chromosome<>Staphylococcus_aureus_COL_chromosome<>Staphylococcus_aureus_aureus_MRSA252_chromosome<>Staphylococcus_aureus_aureus_MSSA476_chromosome<>Staphylococcus_epidermidis_RP62A_chromosome<>Streptococcus_pneumoniae_TIGR4_chromosome<>Streptococcus_pneumoniae_R6_chromosome<>Listeria_monocytogenes_chromosome<>Oceanobacillus_iheyensis_chromosome<>Streptococcus_mutans_chromosome…	NC_000964_RNaseP_bact_b(-)_-_(hom)|NC_003210_RNaseP_bact_b(-)_-_(hom)	0	-	RNaseP_bact_b_NC_000964|UD(5'(0-0)|3'(0-0)),RNaseP_bact_b_NC_003210|UD(5'(0-0)|3'(1-1)),RNaseP_bact_b_NC_002745|UD(5'(0-1)|3'(1-1))	-	-	-
Bacillus_anthracis_Ames	|	T-box_NC_003997	|	BA1834		polysaccharide biosynthesis family protein	*	<<<	65	|	1720851	1721251	>>>	400	|	278	>>>	BA1835	sodium-dependent transporter	*	T-box	2817	7e-122	X		6	RNA	Bacillus_cereus_ATCC_10987_chromosome<>Bacillus_cereus_ATCC14579_chromosome<>Bacillus_thuringiensis_konkukian_chromosome<>Bacillus_cereus_ZK_chromosome<>Bacillus_thuringiensis_Al_Hakam_chromosome<>Bacillus_cereus_cytotoxis_NVH_391-98_chromosome	NC_000964_T1box1(+)_+_(hom)|NC_003210_T1box1(+)_+_(hom)|NC_000964_T1box5(+)_+_(hom)|NC_000964_T1box13(-)_-_(hom)|NC_003210_T1box14(-)_-_(hom)|NC_002745_T1box7(-)_-_(hom)|NC_002745_T1box8(-)_-_(hom)|NC_000964_T1box7(-)_-_(hom)|NC_003210_T1box7(-)_-_(hom)|NC_000964_T1box18(+)_+_(hom)|NC_000964_T1box9(-)_-_(hom)	10	T-box_NC_003997(para),T-box_NC_003997(para),T-box_NC_003997(para),Candidate_591_NC_003997(para),T-box_NC_003997(para),T-box_NC_003997(para),T-box_NC_003997(para),T-box_NC_003997(para),T-box_NC_003997(para),T-box_NC_003997(para)	T1box3_NC_000964|UD(5'(1-1)|3'(0-0)),T1box12_NC_003210|UD(5'(1-1)|3'(0-0)),T1box7_NC_003210|UD(5'(1-1)|3'(0-0)),T1box5_NC_000964|UD(5'(0-0)|3'(0-0)),T1box4_NC_002745|UD(5'(0-0)|3'(0-0)),T1box8_NC_000964|UD(5'(1-1)|3'(0-0)),T1box10_NC_000964|UD(5'(0-0)|3'(1-1)),Lysine2_NC_002745|UD(5'(1-1)|3'(1-1)),T1box12_NC_000964|UD(5'(0-0)|3'(0-0)),T1box6_NC_003210|UD(5'(1-0)|3'(0-0)),T1box8_NC_002745|UD(5'(1-…	-	-	-B.subtilis_sigG_2(8.44|-302)
Bacillus_anthracis_Ames	|	SAM_NC_003997	|	BA0175		ABC transporter, substrate-binding protein,	*	<<<	31	|	177106	177343	<<<	237	|	10	<<<	BA0176	alcohol dehydrogenase, zinc-containing	*	SAM	473	1e-15	Z		8	RNA	Listeria_monocytogenes_4b_F2365_chromosome<>Listeria_monocytogenes_chromosome<>Listeria_innocua_chromosome<>Bacillus_cereus_ATCC_10987_chromosome<>Bacillus_cereus_ATCC14579_chromosome<>Bacillus_cereus_ZK_chromosome<>Listeria_welshimeri_serovar_6b_SLCC5334_chromosome<>Bacillus_thuringiensis_Al_Hakam_chromosome	NC_003210_S_box2(-)_-_(hom)|NC_003210_S_box6(-)_-_(hom)|NC_000964_S_box6(+)_+_(hom)|NC_003210_S_box7(-)_-_(hom)|NC_000964_S_box2(+)_+_(hom)|NC_000964_S_box10(+)_+_(hom)|NC_002745_S_box2(+)_+_(hom)|NC_000964_S_box1(-)_-_(hom)|NC_000964_S_box9(-)_-_(hom)|NC_000964_S_box11(+)_+_(hom)|NC_000964_S_box7(-)_-_(hom)|NC_000964_S_box5(+)_+_(hom)|NC_000964_S_box8(-)_-_(hom)|NC_003210_S_box1(+)_+_(hom)|NC_00…	10	SAM_NC_003997(para),SAM_NC_003997(para),Candidate_110_NC_003997(para),SAM_NC_003997(para),SAM_NC_003997(para),SAM_NC_003997(para),Candidate_25_NC_003997(para),SAM_NC_003997(para),SAM_NC_003997(para),SAM_NC_003997(para)	S_box2_NC_003210|UD(5'(1-1)|3'(0-0)),S_box4_NC_000964|UD(5'(1-1)|3'(0-0)),S_box5_NC_000964|UD(5'(1-1)|3'(0-1)),S_box9_NC_000964|UD(5'(1-1)|3'(0-0)),S_box4_NC_002745|3'(0),S_box1_NC_000964|3'(0),S_box2_NC_000964|3'(0),T1box2_NC_002745|3'(0),S_box3_NC_003210|3'(0),S_box7_NC_003210|3'(0),S_box2_NC_002745|3'(0)	-	RS	-B.subtilis_sigA_2(9.4|-199)
Bacillus_anthracis_Ames	|	T-box_NC_003997	|	BA1965		hypothetical protein	*	>>>	544	|	1850220	1850505	>>>	285	|	133	>>>	BA1968	homoserine dehydrogenase	*	T-box	484	2.8e-28	Y		3	RNA	Geobacillus_kaustophilus_HTA426_chromosome<>Bacillus_clausii_KSM-K16_chromosome<>Geobacillus_thermodenitrificans_NG80-2_chromosome	NC_000964_T1box15(-)_-_(hom)|NC_000964_T1box16(-)_-_(hom)|NC_000964_T1box17(-)_-_(hom)|NC_000964_T1box12(-)_-_(hom)|NC_003210_T1box6(-)_-_(hom)|NC_003210_T1box2(-)_-_(hom)	1	T-box_NC_003997(tandem)	T1box3_NC_000964|UD(5'(1-1)|3'(0-0)),T1box12_NC_003210|UD(5'(1-1)|3'(0-0)),T1box7_NC_003210|UD(5'(1-1)|3'(0-0)),T1box5_NC_000964|UD(5'(0-0)|3'(0-0)),T1box4_NC_002745|UD(5'(0-0)|3'(0-0)),T1box8_NC_000964|UD(5'(1-1)|3'(0-0)),T1box10_NC_000964|UD(5'(0-0)|3'(1-1)),Lysine2_NC_002745|UD(5'(1-1)|3'(1-1)),T1box12_NC_000964|UD(5'(0-0)|3'(0-0)),T1box6_NC_003210|UD(5'(1-0)|3'(0-0)),T1box8_NC_002745|UD(5'(1-…	-	-	-B.subtilis_sigA_1(11.39|-274)
Bacillus_anthracis_Ames	|	T-box_NC_003997	|	BA2174		hypothetical protein	*	>>>	1	|	2024266	2024536	>>>	270	|	28	>>>	BA2175	arginyl-tRNA synthetase	*	T-box	1131	2.5e-45	Z		5	RNA	Bacillus_cereus_ATCC14579_chromosome<>Bacillus_thuringiensis_konkukian_chromosome<>Bacillus_cereus_ZK_chromosome<>Bacillus_thuringiensis_Al_Hakam_chromosome<>Bacillus_cereus_cytotoxis_NVH_391-98_chromosome	NC_000964_T1box3(-)_-_(hom)|NC_002745_T1box8(-)_-_(hom)|NC_002745_T1box7(-)_-_(hom)|NC_000964_T1box14(-)_-_(hom)|NC_003210_T1box4(-)_-_(hom)	6	T-box_NC_003997(para),Candidate_591_NC_003997(para),Candidate_10_NC_003997(para),T-box_NC_003997(para),T-box_NC_003997(para),Candidate_592_NC_003997(para)	T1box3_NC_000964|UD(5'(1-1)|3'(0-0)),T1box12_NC_003210|UD(5'(1-1)|3'(0-0)),T1box7_NC_003210|UD(5'(1-1)|3'(0-0)),T1box5_NC_000964|UD(5'(0-0)|3'(0-0)),T1box4_NC_002745|UD(5'(0-0)|3'(0-0)),T1box8_NC_000964|UD(5'(1-1)|3'(0-0)),T1box10_NC_000964|UD(5'(0-0)|3'(1-1)),Lysine2_NC_002745|UD(5'(1-1)|3'(1-1)),T1box12_NC_000964|UD(5'(0-0)|3'(0-0)),T1box6_NC_003210|UD(5'(1-0)|3'(0-0)),T1box8_NC_002745|UD(5'(1-…	5	RS	-B.subtilis_sigG_2(9.52|-228)B.subtilis_sigA_1(10.25|-250)
Bacillus_anthracis_Ames	|	T-box_NC_003997	|	BA2956		chorismate synthase	*	<<<	30	|	2727026	2727116	<<<	90	|	1	<<<	BA2957	hypothetical protein	*	T-box	516	1.6e-17	Z		5	RNA	Bacillus_cereus_ATCC_10987_chromosome<>Bacillus_cereus_ATCC14579_chromosome<>Bacillus_thuringiensis_konkukian_chromosome<>Bacillus_cereus_ZK_chromosome<>Bacillus_thuringiensis_Al_Hakam_chromosome	NC_003210_T1box7(-)_-_(hom)|NC_003210_T1box3(-)_-_(hom)|NC_002745_T1box7(-)_-_(hom)|NC_003210_T1box1(+)_+_(hom)|NC_000964_T1box13(-)_-_(hom)|NC_000964_T1box7(-)_-_(hom)|NC_002745_T1box8(-)_-_(hom)|NC_000964_T1box9(-)_-_(hom)|NC_000964_T1box5(+)_+_(hom)	3	T-box_NC_003997(para),T-box_NC_003997(para),Candidate_664_NC_003997(para)	T1box3_NC_000964|UD(5'(1-1)|3'(0-0)),T1box12_NC_003210|UD(5'(1-1)|3'(0-0)),T1box7_NC_003210|UD(5'(1-1)|3'(0-0)),T1box5_NC_000964|UD(5'(0-0)|3'(0-0)),T1box4_NC_002745|UD(5'(0-0)|3'(0-0)),T1box8_NC_000964|UD(5'(1-1)|3'(0-0)),T1box10_NC_000964|UD(5'(0-0)|3'(1-1)),Lysine2_NC_002745|UD(5'(1-1)|3'(1-1)),T1box12_NC_000964|UD(5'(0-0)|3'(0-0)),T1box6_NC_003210|UD(5'(1-0)|3'(0-0)),T1box8_NC_002745|UD(5'(1-…	-	RS	-
Bacillus_anthracis_Ames	|	T-box_NC_003997	|	BA2958		3-deoxy-7-phosphoheptulonate synthase	*	<<<	462	|	2728819	2728950	<<<	131	|	237	<<<	BA2959	hypothetical protein	*	T-box	185	2.5e-16	Z		7	RNA	Bacillus_halodurans_chromosome<>Bacillus_cereus_ATCC_10987_chromosome<>Bacillus_cereus_ATCC14579_chromosome<>Bacillus_thuringiensis_konkukian_chromosome<>Bacillus_cereus_ZK_chromosome<>Bacillus_thuringiensis_Al_Hakam_chromosome<>Bacillus_cereus_cytotoxis_NVH_391-98_chromosome	NC_000964_T1box13(-)_-_(hom)|NC_003210_T1box1(+)_+_(hom)|NC_002745_T1box8(-)_-_(hom)|NC_003210_T1box11(-)_-_(hom)|NC_002745_T1box7(-)_-_(hom)|NC_002745_T1box4(+)_+_(hom)|NC_003210_T1box3(-)_-_(hom)|NC_000964_T1box18(+)_+_(hom)|NC_003210_T1box7(-)_-_(hom)|NC_000964_T1box9(-)_-_(hom)|NC_000964_T1box7(-)_-_(hom)	7	T-box_NC_003997(para),Candidate_581_NC_003997(para),T-box_NC_003997(para),T-box_NC_003997(para),T-box_NC_003997(para),Candidate_664_NC_003997(para),T-box_NC_003997(para)	T1box3_NC_000964|UD(5'(1-1)|3'(0-0)),T1box12_NC_003210|UD(5'(1-1)|3'(0-0)),T1box7_NC_003210|UD(5'(1-1)|3'(0-0)),T1box5_NC_000964|UD(5'(0-0)|3'(0-0)),T1box4_NC_002745|UD(5'(0-0)|3'(0-0)),T1box8_NC_000964|UD(5'(1-1)|3'(0-0)),T1box10_NC_000964|UD(5'(0-0)|3'(1-1)),Lysine2_NC_002745|UD(5'(1-1)|3'(1-1)),T1box12_NC_000964|UD(5'(0-0)|3'(0-0)),T1box6_NC_003210|UD(5'(1-0)|3'(0-0)),T1box8_NC_002745|UD(5'(1-…	-	-	-
Bacillus_anthracis_Ames	|	Lysine_NC_003997	|	BA3075		acetyltransferase, GNAT family	*	<<<	79	|	2833402	2833900	>>>	498	|	49	>>>	BA3076	lysine-specific permease	*	Lysine	2093	2.4e-89	X		1	COD	Bacillus_cereus_cytotoxis_NVH_391-98_chromosome	NC_003210_Lysine(-)_-_(hom)|NC_000964_Lysine2(-)_-_(hom)	0	-	Lysine_NC_003210|3'(0),Lysine2_NC_002745|3'(0)	5	-	-B.subtilis_sigA_2(9.56|-300)B.subtilis_sigA_3(9.09|-157)
Bacillus_anthracis_Ames	|	TPP_NC_003997	|	BA0375		DNA topoisomerase III	*	<<<	187	|	393875	394059	>>>	184	|	36	>>>	BA0376	hydroxyethylthiazole kinase	*	TPP	480	2.2e-16	X		6	RNA	Bacillus_cereus_ATCC_10987_chromosome<>Bacillus_thuringiensis_konkukian_chromosome<>Bacillus_cereus_ZK_chromosome<>Bacillus_thuringiensis_Al_Hakam_chromosome<>Geobacillus_thermodenitrificans_NG80-2_chromosome<>Bacillus_cereus_cytotoxis_NVH_391-98_chromosome	NC_000964_THI5(+)_+_(hom)|NC_003210_THI1(+)_+_(hom)|NC_003210_THI2(-)_-_(hom)	1	TPP_NC_003997(para)	THI2_NC_000964|3'(0),THI1_NC_000964|3'(0),THI1_NC_002505|3'(0),THI2_NC_000913|3'(0),THI_NC_002516|3'(0),THI1_NC_003112|3'(0),THI_NC_005072|3'(0)	5	RS	-
Bacillus_anthracis_Ames	|	SAM_NC_003997	|	BA4479		bifunctional homocysteine	*	<<<	24	|	4073925	4074370	<<<	445	|	116	>>>	BA4480	cystathionine beta-lyase	*	SAM	2326	1.7e-99	X		1	RNA	Bacillus_thuringiensis_Al_Hakam_chromosome	NC_003210_S_box3(-)_-_(hom)|NC_000964_S_box1(-)_-_(hom)|NC_003210_S_box6(-)_-_(hom)|NC_002745_S_box2(+)_+_(hom)|NC_000964_S_box2(+)_+_(hom)|NC_003210_S_box2(-)_-_(hom)|NC_000964_S_box11(+)_+_(hom)|NC_000964_S_box7(-)_-_(hom)|NC_000964_S_box10(+)_+_(hom)|NC_002745_S_box4(-)_-_(hom)|NC_003210_S_box5(-)_-_(hom)|NC_003210_S_box3(-)_-_(hom|rev)|NC_000964_S_box9(-)_-_(hom)|NC_000964_S_box1(-)_-_(hom|re…	9	Candidate_62_NC_003997(anti),Candidate_97_NC_003997(tandem),SAM_NC_003997(anti),SAM_NC_003997(para),Candidate_110_NC_003997(para),SAM_NC_003997(para),Candidate_25_NC_003997(para),SAM_NC_003997(para),SAM_NC_003997(para),SAM_NC_003997(para),SAM_NC_003997(para),SAM_NC_003997(para)	S_box2_NC_003210|UD(5'(1-1)|3'(0-0)),S_box4_NC_000964|UD(5'(1-1)|3'(0-0)),S_box5_NC_000964|UD(5'(1-1)|3'(0-1)),S_box9_NC_000964|UD(5'(1-1)|3'(0-0)),S_box4_NC_002745|3'(0),S_box1_NC_000964|3'(0),S_box2_NC_000964|3'(0),T1box2_NC_002745|3'(0),S_box3_NC_003210|3'(0),S_box7_NC_003210|3'(0),S_box2_NC_002745|3'(0)	5	RS	-
Bacillus_anthracis_Ames	|	T-box_NC_003997	|	BA0395		hypothetical protein	*	>>>	1	|	414038	414357	>>>	319	|	26	>>>	BA0396	prolyl-tRNA synthetase	*	T-box	1243	1.9e-50	Y		6	RNA	Bacillus_cereus_ATCC_10987_chromosome<>Bacillus_cereus_ATCC14579_chromosome<>Bacillus_thuringiensis_konkukian_chromosome<>Bacillus_cereus_ZK_chromosome<>Bacillus_thuringiensis_Al_Hakam_chromosome<>Bacillus_cereus_cytotoxis_NVH_391-98_chromosome	NC_000964_T1box1(+)_+_(hom)|NC_000964_T1box8(-)_-_(hom)|NC_000964_T1box3(-)_-_(hom)|NC_002745_sprC(-)_-_(hom|rev)	1	T-box_NC_003997(para)	T1box3_NC_000964|UD(5'(1-1)|3'(0-0)),T1box12_NC_003210|UD(5'(1-1)|3'(0-0)),T1box7_NC_003210|UD(5'(1-1)|3'(0-0)),T1box5_NC_000964|UD(5'(0-0)|3'(0-0)),T1box4_NC_002745|UD(5'(0-0)|3'(0-0)),T1box8_NC_000964|UD(5'(1-1)|3'(0-0)),T1box10_NC_000964|UD(5'(0-0)|3'(1-1)),Lysine2_NC_002745|UD(5'(1-1)|3'(1-1)),T1box12_NC_000964|UD(5'(0-0)|3'(0-0)),T1box6_NC_003210|UD(5'(1-0)|3'(0-0)),T1box8_NC_002745|UD(5'(1-…	5	RS	-B.subtilis_sigK_1(9.12|-107)B.subtilis_sigG_2(10.28|-341)B.subtilis_sigG_2(8.78|-297)B.subtilis_sigG_2(8.15|-287)
Bacillus_anthracis_Ames	|	T-box_NC_003997	|	BA4584		minor extracellular protease VpR	*	>>>	1	|	4166038	4166358	>>>	320	|	415	>>>	BA4586	phenylalanine-4-hydroxylase, putative	*	T-box	193	1.8e-16	Z		6	RNA	Bacillus_cereus_ATCC_10987_chromosome<>Bacillus_cereus_ATCC14579_chromosome<>Bacillus_thuringiensis_konkukian_chromosome<>Bacillus_cereus_ZK_chromosome<>Bacillus_thuringiensis_Al_Hakam_chromosome<>Bacillus_cereus_cytotoxis_NVH_391-98_chromosome	NC_003210_T1box1(+)_+_(hom)|NC_000964_T1box13(-)_-_(hom)|NC_002745_T1box7(-)_-_(hom)|NC_002745_T1box8(-)_-_(hom)|NC_000964_T1box18(+)_+_(hom)|NC_000964_T1box1(+)_+_(hom)|NC_003210_T1box10(-)_-_(hom)|NC_003210_T1box2(-)_-_(hom)|NC_003210_T1box3(-)_-_(hom)	8	Candidate_581_NC_003997(para),T-box_NC_003997(para),T-box_NC_003997(para),T-box_NC_003997(para),T-box_NC_003997(para),Candidate_591_NC_003997(para),T-box_NC_003997(para),Candidate_664_NC_003997(para)	T1box3_NC_000964|UD(5'(1-1)|3'(0-0)),T1box12_NC_003210|UD(5'(1-1)|3'(0-0)),T1box7_NC_003210|UD(5'(1-1)|3'(0-0)),T1box5_NC_000964|UD(5'(0-0)|3'(0-0)),T1box4_NC_002745|UD(5'(0-0)|3'(0-0)),T1box8_NC_000964|UD(5'(1-1)|3'(0-0)),T1box10_NC_000964|UD(5'(0-0)|3'(1-1)),Lysine2_NC_002745|UD(5'(1-1)|3'(1-1)),T1box12_NC_000964|UD(5'(0-0)|3'(0-0)),T1box6_NC_003210|UD(5'(1-0)|3'(0-0)),T1box8_NC_002745|UD(5'(1-…	-	-	-B.subtilis_sigG_2(8.51|-436)B.subtilis_sigA_3(12.5|-281)
Bacillus_anthracis_Ames	|	T-box_NC_003997	|	BA4616		alanyl-tRNA synthetase	*	<<<	21	|	4195182	4195469	<<<	287	|	173	>>>	BA4617	hypothetical protein	*	T-box	331	1.8e-38	X		6	RNA	Bacillus_cereus_ATCC_10987_chromosome<>Bacillus_cereus_ATCC14579_chromosome<>Bacillus_thuringiensis_konkukian_chromosome<>Bacillus_cereus_ZK_chromosome<>Bacillus_thuringiensis_Al_Hakam_chromosome<>Bacillus_cereus_cytotoxis_NVH_391-98_chromosome	NC_000964_T1box8(-)_-_(hom)|NC_002745_T1box8(-)_-_(hom)|NC_002745_T1box7(-)_-_(hom)|NC_003210_T1box4(-)_-_(hom)|NC_000964_T1box14(-)_-_(hom)|NC_000964_T1box17(-)_-_(hom)|NC_003210_T1box2(-)_-_(hom)|NC_003210_T1box1(+)_+_(hom)|NC_000964_T1box7(-)_-_(hom)|NC_003210_T1box14(-)_-_(hom)	6	T-box_NC_003997(para),Candidate_591_NC_003997(para),T-box_NC_003997(para),Candidate_592_NC_003997(para),T-box_NC_003997(para),T-box_NC_003997(para)	T1box3_NC_000964|UD(5'(1-1)|3'(0-0)),T1box12_NC_003210|UD(5'(1-1)|3'(0-0)),T1box7_NC_003210|UD(5'(1-1)|3'(0-0)),T1box5_NC_000964|UD(5'(0-0)|3'(0-0)),T1box4_NC_002745|UD(5'(0-0)|3'(0-0)),T1box8_NC_000964|UD(5'(1-1)|3'(0-0)),T1box10_NC_000964|UD(5'(0-0)|3'(1-1)),Lysine2_NC_002745|UD(5'(1-1)|3'(1-1)),T1box12_NC_000964|UD(5'(0-0)|3'(0-0)),T1box6_NC_003210|UD(5'(1-0)|3'(0-0)),T1box8_NC_002745|UD(5'(1-…	5	RS	-B.subtilis_sigK_1(10|-360)B.subtilis_sigA_3(9.78|-253)
Bacillus_anthracis_Ames	|	T-box_NC_003997	|	BA4804		phenylalanyl-tRNA synthetase alpha subunit	*	<<<	26	|	4369836	4370086	<<<	250	|	43	<<<	BA4805	RNA methyltransferase, TrmH family	*	T-box	525	4.6e-18	Y		10	RNA	Listeria_monocytogenes_4b_F2365_chromosome<>Listeria_monocytogenes_chromosome<>Listeria_innocua_chromosome<>Bacillus_cereus_ATCC_10987_chromosome<>Oceanobacillus_iheyensis_chromosome<>Bacillus_cereus_ATCC14579_chromosome<>Bacillus_thuringiensis_konkukian_chromosome<>Bacillus_cereus_ZK_chromosome<>Geobacillus_kaustophilus_HTA426_chromosome<>Bacillus_cereus_cytotoxis_NVH_391-98_chromosome	NC_003210_T1box1(+)_+_(hom)|NC_003210_T1box5(-)_-_(hom)|NC_000964_T1box9(-)_-_(hom)|NC_000964_T1box5(+)_+_(hom)|NC_002745_T1box7(-)_-_(hom)|NC_002745_T1box8(-)_-_(hom)|NC_000964_T1box6(+)_+_(hom)|NC_003210_T1box14(-)_-_(hom)|NC_000964_T1box17(-)_-_(hom)|NC_000964_T1box13(-)_-_(hom)|NC_002745_T1box4(+)_+_(hom)|NC_000964_T1box1(+)_+_(hom)|NC_000964_T1box2(+)_+_(hom)|NC_002745_SRP_bact(+)_+_(hom)|NC…	7	T-box_NC_003997(para),T-box_NC_003997(para),T-box_NC_003997(para),T-box_NC_003997(para),T-box_NC_003997(para),T-box_NC_003997(para),T-box_NC_003997(para)	T1box3_NC_000964|UD(5'(1-1)|3'(0-0)),T1box12_NC_003210|UD(5'(1-1)|3'(0-0)),T1box7_NC_003210|UD(5'(1-1)|3'(0-0)),T1box5_NC_000964|UD(5'(0-0)|3'(0-0)),T1box4_NC_002745|UD(5'(0-0)|3'(0-0)),T1box8_NC_000964|UD(5'(1-1)|3'(0-0)),T1box10_NC_000964|UD(5'(0-0)|3'(1-1)),Lysine2_NC_002745|UD(5'(1-1)|3'(1-1)),T1box12_NC_000964|UD(5'(0-0)|3'(0-0)),T1box6_NC_003210|UD(5'(1-0)|3'(0-0)),T1box8_NC_002745|UD(5'(1-…	5	RS	-B.subtilis_sigA_2(9.63|-279)
Bacillus_anthracis_Ames	|	T-box_NC_003997	|	BA4820		threonyl-tRNA synthetase	*	<<<	28	|	4383498	4383773	<<<	275	|	2	<<<	BA4821	hypothetical protein	*	T-box	550	4.1e-19	Z		8	RNA	Bacillus_cereus_ATCC_10987_chromosome<>Bacillus_cereus_ATCC14579_chromosome<>Bacillus_thuringiensis_konkukian_chromosome<>Bacillus_cereus_ZK_chromosome<>Geobacillus_kaustophilus_HTA426_chromosome<>Bacillus_thuringiensis_Al_Hakam_chromosome<>Geobacillus_thermodenitrificans_NG80-2_chromosome<>Bacillus_cereus_cytotoxis_NVH_391-98_chromosome	NC_000964_T1box15(-)_-_(hom)|NC_000964_T1box16(-)_-_(hom)|NC_000964_T1box17(-)_-_(hom)|NC_000964_T1box12(-)_-_(hom)|NC_003210_T1box6(-)_-_(hom)|NC_000964_T1box5(+)_+_(hom)|NC_003210_T1box5(-)_-_(hom)|NC_000964_T1box1(+)_+_(hom)|NC_000964_T1box13(-)_-_(hom)|NC_003210_T1box2(-)_-_(hom)|NC_002745_T1box1(+)_+_(hom)|NC_000964_T1box14(-)_-_(hom)	8	T-box_NC_003997(para),T-box_NC_003997(para),T-box_NC_003997(para),T-box_NC_003997(para),T-box_NC_003997(para),T-box_NC_003997(para),T-box_NC_003997(para),T-box_NC_003997(para)	T1box3_NC_000964|UD(5'(1-1)|3'(0-0)),T1box12_NC_003210|UD(5'(1-1)|3'(0-0)),T1box7_NC_003210|UD(5'(1-1)|3'(0-0)),T1box5_NC_000964|UD(5'(0-0)|3'(0-0)),T1box4_NC_002745|UD(5'(0-0)|3'(0-0)),T1box8_NC_000964|UD(5'(1-1)|3'(0-0)),T1box10_NC_000964|UD(5'(0-0)|3'(1-1)),Lysine2_NC_002745|UD(5'(1-1)|3'(1-1)),T1box12_NC_000964|UD(5'(0-0)|3'(0-0)),T1box6_NC_003210|UD(5'(1-0)|3'(0-0)),T1box8_NC_002745|UD(5'(1-…	5	RS	-B.subtilis_sigG_1(9.85|-400)B.subtilis_sigG_3(9.66|-248)B.subtilis_sigA_2(11.39|-269)
Bacillus_anthracis_Ames	|	T-box_NC_003997	|	BA4911		tyrosyl-tRNA synthetase	*	<<<	52	|	4462190	4462491	<<<	301	|	22	<<<	BA4912	hypothetical protein	*	T-box	568	2.7e-20	Z		6	RNA	Bacillus_cereus_ATCC_10987_chromosome<>Bacillus_cereus_ATCC14579_chromosome<>Bacillus_thuringiensis_konkukian_chromosome<>Bacillus_cereus_ZK_chromosome<>Bacillus_thuringiensis_Al_Hakam_chromosome<>Bacillus_cereus_cytotoxis_NVH_391-98_chromosome	NC_000964_T1box13(-)_-_(hom)|NC_003210_T1box9(-)_-_(hom)|NC_000964_T1box5(+)_+_(hom)|NC_000964_T1box18(+)_+_(hom)|NC_002745_T1box7(-)_-_(hom)|NC_000964_T1box7(-)_-_(hom)|NC_002745_T1box8(-)_-_(hom)|NC_002745_T1box3(+)_+_(hom)|NC_000964_T1box9(-)_-_(hom)	6	Candidate_581_NC_003997(para),T-box_NC_003997(para),Candidate_591_NC_003997(para),T-box_NC_003997(para),T-box_NC_003997(para),T-box_NC_003997(para)	T1box3_NC_000964|UD(5'(1-1)|3'(0-0)),T1box12_NC_003210|UD(5'(1-1)|3'(0-0)),T1box7_NC_003210|UD(5'(1-1)|3'(0-0)),T1box5_NC_000964|UD(5'(0-0)|3'(0-0)),T1box4_NC_002745|UD(5'(0-0)|3'(0-0)),T1box8_NC_000964|UD(5'(1-1)|3'(0-0)),T1box10_NC_000964|UD(5'(0-0)|3'(1-1)),Lysine2_NC_002745|UD(5'(1-1)|3'(1-1)),T1box12_NC_000964|UD(5'(0-0)|3'(0-0)),T1box6_NC_003210|UD(5'(1-0)|3'(0-0)),T1box8_NC_002745|UD(5'(1-…	-	RS	-
Bacillus_anthracis_Ames	|	T-box_NC_003997	|	BA4991		leucyl-tRNA synthetase	*	<<<	46	|	4530808	4530867	<<<	59	|	368	<<<	BA4992	permease, putative	*	T-box	232	4.6e-17	Z		10	RNA	Bacillus_cereus_ATCC_10987_chromosome<>Oceanobacillus_iheyensis_chromosome<>Bacillus_cereus_ATCC14579_chromosome<>Bacillus_thuringiensis_konkukian_chromosome<>Bacillus_licheniformis_ATCC_14580_chromosome<>Bacillus_cereus_ZK_chromosome<>Bacillus_licheniformis_DSM_13_chromosome<>Bacillus_thuringiensis_Al_Hakam_chromosome<>Bacillus_cereus_cytotoxis_NVH_391-98_chromosome<>Bacillus_amyloliquefaciens_F…	NC_000964_T1box14(-)_-_(hom)|NC_000964_T1box5(+)_+_(hom)|NC_003210_T1box10(-)_-_(hom)|NC_003210_T1box4(-)_-_(hom)|NC_000964_T1box13(-)_-_(hom)|NC_000964_T1box1(+)_+_(hom)	8	T-box_NC_003997(para),T-box_NC_003997(para),T-box_NC_003997(para),T-box_NC_003997(para),T-box_NC_003997(para),T-box_NC_003997(para),Candidate_10_NC_003997(para),T-box_NC_003997(para)	T1box3_NC_000964|UD(5'(1-1)|3'(0-0)),T1box12_NC_003210|UD(5'(1-1)|3'(0-0)),T1box7_NC_003210|UD(5'(1-1)|3'(0-0)),T1box5_NC_000964|UD(5'(0-0)|3'(0-0)),T1box4_NC_002745|UD(5'(0-0)|3'(0-0)),T1box8_NC_000964|UD(5'(1-1)|3'(0-0)),T1box10_NC_000964|UD(5'(0-0)|3'(1-1)),Lysine2_NC_002745|UD(5'(1-1)|3'(1-1)),T1box12_NC_000964|UD(5'(0-0)|3'(0-0)),T1box6_NC_003210|UD(5'(1-0)|3'(0-0)),T1box8_NC_002745|UD(5'(1-…	-	RS	-
Bacillus_anthracis_Ames	|	T-box_NC_003997	|	BA5261		amino acid permease family protein	*	<<<	46	|	4768849	4769120	<<<	271	|	277	<<<	BA5262	hypothetical protein	*	T-box	233	1.8e-23	Y		6	RNA	Bacillus_halodurans_chromosome<>Bacillus_cereus_ATCC_10987_chromosome<>Bacillus_cereus_ZK_chromosome<>Geobacillus_kaustophilus_HTA426_chromosome<>Geobacillus_thermodenitrificans_NG80-2_chromosome<>Bacillus_cereus_cytotoxis_NVH_391-98_chromosome	NC_000964_T1box12(-)_-_(hom)|NC_003210_T1box6(-)_-_(hom)|NC_000964_T1box15(-)_-_(hom)|NC_000964_T1box16(-)_-_(hom)|NC_000964_T1box17(-)_-_(hom)|NC_002745_T1box7(-)_-_(hom)|NC_000964_T1box1(+)_+_(hom)|NC_002745_T1box1(+)_+_(hom)|NC_000964_T1box5(+)_+_(hom)	5	Candidate_517_NC_003997(tandem),T-box_NC_003997(para),T-box_NC_003997(para),T-box_NC_003997(para),T-box_NC_003997(para)	T1box3_NC_000964|UD(5'(1-1)|3'(0-0)),T1box12_NC_003210|UD(5'(1-1)|3'(0-0)),T1box7_NC_003210|UD(5'(1-1)|3'(0-0)),T1box5_NC_000964|UD(5'(0-0)|3'(0-0)),T1box4_NC_002745|UD(5'(0-0)|3'(0-0)),T1box8_NC_000964|UD(5'(1-1)|3'(0-0)),T1box10_NC_000964|UD(5'(0-0)|3'(1-1)),Lysine2_NC_002745|UD(5'(1-1)|3'(1-1)),T1box12_NC_000964|UD(5'(0-0)|3'(0-0)),T1box6_NC_003210|UD(5'(1-0)|3'(0-0)),T1box8_NC_002745|UD(5'(1-…	-	RS	-B.subtilis_sigG_2(8.18|-312)B.subtilis_sigA_1(11.39|-282)
Bacillus_anthracis_Ames	|	yybP-ykoY_NC_003997	|	BA0808		hypothetical protein	*	<<<	102	|	823957	824183	>>>	226	|	23	>>>	BA0809	hypothetical protein	*	yybP-ykoY	483	3.4e-16	X		7	RNA	Bacillus_halodurans_chromosome<>Bacillus_cereus_ATCC_10987_chromosome<>Bacillus_cereus_ATCC14579_chromosome<>Bacillus_thuringiensis_konkukian_chromosome<>Bacillus_cereus_ZK_chromosome<>Bacillus_thuringiensis_Al_Hakam_chromosome<>Geobacillus_thermodenitrificans_NG80-2_chromosome	NC_000964_yybP1ykoY2(-)_-_(hom)|NC_003210_yybP1ykoY(+)_+_(hom)	0	-	yybP1ykoY_NC_003210|3'(0),yybP1ykoY1_NC_000964|3'(0),yybP1ykoY_NC_002745|3'(0)	5	-	-
Bacillus_anthracis_Ames_0581	|	Candidate_9_NC_007322	|	GBAA_pXO1_0126		hypothetical protein	*	<<<	59	|	110445	110726	<<<	281	|	280	<<<	GBAA_pXO1_0127	hypothetical protein	*	candidate	519	3.3e-17	T		2	RNA	Bacillus_cereus_ZK_plasmid_pE33L466<>Bacillus_cereus_cytotoxis_NVH_391-98_chromosome	NC_005072_yfr1(-)_-_(hom|rev)	0	-	-	-	-	-B.subtilis_sigG_1(9.75|-339)
Bacillus_anthracis_Ames_0581	|	Candidate_4_NC_007323	|	GBAA_pXO2_0077		hypothetical protein	*	>>>	1	|	64700	64886	>>>	186	|	101	>>>	GBAA_pXO2_0078	amino acid efflux protein, (pxo2-63)	*	candidate	566	3.9e-20	Z		6	RNA	Bacillus_cereus_ATCC_10987_chromosome<>Bacillus_cereus_ATCC14579_chromosome<>Bacillus_thuringiensis_konkukian_chromosome<>Bacillus_cereus_ZK_chromosome<>Bacillus_thuringiensis_Al_Hakam_chromosome<>Bacillus_cereus_cytotoxis_NVH_391-98_chromosome	NC_002745_T1box7(-)_-_(hom)|NC_003210_T1box1(+)_+_(hom)|NC_002745_T1box8(-)_-_(hom)|NC_000964_T1box13(-)_-_(hom)|NC_000964_T1box6(+)_+_(hom)|NC_000964_T1box18(+)_+_(hom)|NC_000964_T1box7(-)_-_(hom)|NC_003210_T1box7(-)_-_(hom)|NC_003210_T1box3(-)_-_(hom)|NC_000964_T1box9(-)_-_(hom)	0	-	-	-	-	-B.subtilis_sigG_1(8.78|-270)B.subtilis_sigG_2(9.96|-216)
Bacillus_anthracis_Ames_0581	|	Candidate_6_NC_007530	|	GBAA0984		hypothetical protein	*	<<<	1	|	982845	983072	>>>	227	|	2	<<<	GBAA0985	lipoprotein, putative	*	candidate	1146	1.5e-46	R		3	RNA	Bacillus_thuringiensis_konkukian_chromosome<>Bacillus_cereus_ZK_chromosome<>Bacillus_thuringiensis_Al_Hakam_chromosome	NC_002745_T1box7(-)_-_(hom|rev)	0	-	-	-	-	-
Bacillus_anthracis_Ames_0581	|	Candidate_19_NC_007530	|	GBAA2623		hypothetical protein	*	>>>	60	|	2442704	2442885	>>>	181	|	55	<<<	GBAA2624	hypothetical protein	*	candidate	548	6.7e-19	R		5	RNA	Bacillus_cereus_ATCC_10987_chromosome<>Bacillus_cereus_ATCC14579_chromosome<>Bacillus_thuringiensis_konkukian_chromosome<>Bacillus_cereus_ZK_chromosome<>Bacillus_thuringiensis_Al_Hakam_chromosome	NC_002505_B2(-)_-_(hom)	2	Candidate_346_NC_007530(anti),Candidate_215_NC_007530(para),Candidate_725_NC_007530(para)	-	-	-	-B.subtilis_sigK_2(12.35|-85)
Bacillus_anthracis_Ames_0581	|	Candidate_99_NC_007530	|	GBAA4432		rhodanese-like domain protein	*	>>>	12	|	4040125	4040343	<<<	218	|	18	>>>	GBAA4433	sugar-binding transcriptional regulator, laci	*	candidate	583	1.4e-20	R		6	RNA	Bacillus_cereus_ATCC_10987_chromosome<>Bacillus_cereus_ATCC14579_chromosome<>Bacillus_thuringiensis_konkukian_chromosome<>Bacillus_cereus_ZK_chromosome<>Bacillus_thuringiensis_Al_Hakam_chromosome<>Bacillus_cereus_cytotoxis_NVH_391-98_chromosome	NC_005072_yfr4(+)_+_(hom)	0	-	-	-	-	-
Bacillus_anthracis_Ames_0581	|	Candidate_117_NC_007530	|	GBAA2477		hypothetical protein	*	<<<	242	|	2304962	2305211	<<<	249	|	277	>>>	GBAA2479	transcriptional regulator, tetr family	*	candidate	647	5.9e-24	R		1	RNA	Bacillus_cereus_ATCC_10987_chromosome	NC_000913_IS063_tke8_micC(+)_+_(hom|rev)	4	Candidate_313_NC_007530(para),Candidate_31_NC_007530(para),Candidate_632_NC_007530(para),Candidate_633_NC_007530(para)	-	-	-	-B.subtilis_sigK_1(11.82|-68)B.subtilis_sigK_1(11.46|-182)B.subtilis_sigK_3(9.45|-68)B.subtilis_sigK_3(9.69|-182)
Bacillus_anthracis_Ames_0581	|	Candidate_127_NC_007530	|	GBAA1603		hypothetical protein	*	>>>	1	|	1510341	1510729	<<<	388	|	302	>>>	GBAA1605	cation transporter, putative	*	candidate	539	6.5e-19	R		1	RNA	Clostridium_beijerinckii_NCIMB_8052_chromosome	NC_000964_ykoK(+)_+_(hom|rev)|NC_003210_ykoK(-)_-_(hom|rev)|NC_002505_ykoK(+)_+_(hom|rev)	0	ykoK_NC_007530(anti)	-	-	-	-
Bacillus_anthracis_Ames_0581	|	Candidate_142_NC_007530	|	GBAA0831		acetyltransferase	*	>>>	15	|	841269	841603	<<<	334	|	8	>>>	GBAA0832	suge protein, putative	*	candidate	707	3.2e-26	R		4	RNA	Bacillus_cereus_ATCC14579_chromosome<>Bacillus_thuringiensis_konkukian_chromosome<>Bacillus_cereus_ZK_chromosome<>Bacillus_thuringiensis_Al_Hakam_chromosome	NC_000913_C0067(+)_+_(hom)	4	Candidate_52_NC_007530(para),Candidate_617_NC_007530(para),Candidate_736_NC_007530(para),Candidate_737_NC_007530(para)	-	-	-	-B.subtilis_sigG_2(9.37|-213)
Bacillus_anthracis_Ames_0581	|	Candidate_169_NC_007530	|	GBAA0159		D-fructose-6-phosphate amidotransferase	*	>>>	17	|	159694	159870	>>>	176	|	169	>>>	GBAA0160	hypothetical protein	*	candidate	1630	3.4e-68	T		2	RNA	Bacillus_thuringiensis_konkukian_chromosome<>Bacillus_cereus_ZK_chromosome	NC_002745_RNAIII(-)_-_(hom|rev)	1	Candidate_384_NC_007530(para)	-	-	-	-B.subtilis_sigG_1(8.22|-263)
Bacillus_anthracis_Ames_0581	|	Candidate_228_NC_007530	|	GBAA0953		hypothetical protein	*	>>>	64	|	958503	958613	<<<	110	|	179	<<<	GBAA0954	mxaa domain protein	*	candidate	483	7.9e-16	T		3	RNA	Bacillus_cereus_ATCC14579_chromosome<>Bacillus_cereus_ZK_chromosome<>Bacillus_thuringiensis_Al_Hakam_chromosome	NC_002745_sprG(-)_-_(hom)|NC_002745_sprF(+)_+_(hom|rev)	3	Candidate_233_NC_007530(para),Candidate_738_NC_007530(para),Candidate_555_NC_007530(para)	-	-	-	-
Bacillus_anthracis_Ames_0581	|	Candidate_232_NC_007530	|	GBAA0977		hypothetical protein	*	>>>	514	|	977432	977525	<<<	93	|	28	<<<	GBAA0978	hypothetical protein	*	candidate	857	3.8e-33	T		5	-	Bacillus_thuringiensis_konkukian_chromosome<>Bacillus_cereus_ZK_chromosome<>Bacillus_cereus_ZK_plasmid_pE33L466<>Bacillus_thuringiensis_Al_Hakam_plasmid_pALH1<>Bacillus_thuringiensis_Al_Hakam_chromosome	NC_002745_S_box3(-)_-_(hom)	0	-	-	-	-	-
Bacillus_anthracis_Ames_0581	|	Candidate_264_NC_007530	|	GBAA1469		hypothetical protein	*	>>>	-2	|	1389651	1389850	<<<	199	|	95	<<<	GBAA1470	hypothetical protein	*	candidate	935	2.7e-36	T		5	RNA	Bacillus_cereus_ATCC_10987_chromosome<>Bacillus_thuringiensis_konkukian_chromosome<>Bacillus_cereus_ZK_chromosome<>Bacillus_thuringiensis_Al_Hakam_chromosome<>Bacillus_cereus_cytotoxis_NVH_391-98_chromosome	NC_000964_S_box6(+)_+_(hom|rev)	0	-	-	-	-	-B.subtilis_sigG_1(8.2|-231)
Bacillus_anthracis_Ames_0581	|	Candidate_280_NC_007530	|	GBAA1641		transcriptional regulator, merr family	*	>>>	1	|	1555613	1555713	>>>	100	|	36	>>>	GBAA1642	mate efflux family protein, putative	*	candidate	645	4.9e-23	T		4	-	Bacillus_cereus_ATCC14579_chromosome<>Bacillus_thuringiensis_konkukian_chromosome<>Bacillus_cereus_ZK_chromosome<>Bacillus_thuringiensis_Al_Hakam_chromosome	NC_002745_RNAIII(-)_-_(hom|rev)	0	-	-	5	-	-
Bacillus_anthracis_Ames_0581	|	Candidate_285_NC_007530	|	GBAA1741		hypothetical protein	*	>>>	1	|	1634757	1634826	>>>	69	|	88	>>>	GBAA1742	hypothetical protein	*	candidate	535	1.2e-18	T		4	RNA	Bacillus_cereus_ATCC_10987_chromosome<>Bacillus_thuringiensis_konkukian_chromosome<>Bacillus_cereus_ZK_chromosome<>Bacillus_thuringiensis_Al_Hakam_chromosome	NC_003210_rliE(+)_+_(hom|rev)	0	-	-	-	-	-
Bacillus_anthracis_Ames_0581	|	Candidate_286_NC_007530	|	GBAA1764		hypothetical protein	*	>>>	104	|	1653605	1653665	>>>	60	|	167	>>>	GBAA1766	na+/h+ antiporter nhac	*	candidate	730	3.5e-27	T		5	RNA	Bacillus_cereus_ATCC_10987_chromosome<>Bacillus_thuringiensis_konkukian_chromosome<>Bacillus_cereus_ZK_chromosome<>Bacillus_thuringiensis_Al_Hakam_chromosome<>Bacillus_cereus_cytotoxis_NVH_391-98_chromosome	NC_000964_SR1(+)_+_(hom)	1	Candidate_59_NC_007530(para)	-	-	-	-B.subtilis_sigG_3(8.07|-58)
Bacillus_anthracis_Ames_0581	|	Candidate_290_NC_007530	|	GBAA1860		hydrolase, alpha/beta fold family	*	>>>	1	|	1744658	1744915	>>>	257	|	165	>>>	GBAA1861	methyl-accepting/dna response regulator,	*	candidate	1971	2e-83	B		1	RNA	Bacillus_cereus_ZK_chromosome	NC_003210_S_box6(-)_-_(hom)	0	Candidate_125_NC_007530(anti)	-	-	-	-
Bacillus_anthracis_Ames_0581	|	Candidate_300_NC_007530	|	GBAA2000		transition state transcriptional regulatory	*	>>>	1	|	1882490	1882565	>>>	75	|	197	>>>	GBAA2001	intracellular serine protease	*	candidate	1352	2.9e-55	T		5	RNA	Bacillus_cereus_ATCC_10987_chromosome<>Bacillus_cereus_ATCC14579_chromosome<>Bacillus_thuringiensis_konkukian_chromosome<>Bacillus_cereus_ZK_chromosome<>Bacillus_thuringiensis_Al_Hakam_chromosome	NC_002745_sprF(+)_+_(hom|rev)	0	-	-	-	-	-
Bacillus_anthracis_Ames_0581	|	Candidate_313_NC_007530	|	GBAA2334		hypothetical protein	*	>>>	694	|	2171561	2171761	<<<	200	|	2	<<<	GBAA2335	hypothetical protein	*	candidate	2259	7.5e-97	B		4	-	Bacillus_cereus_ATCC_10987_chromosome<>Bacillus_thuringiensis_konkukian_chromosome<>Bacillus_cereus_ZK_chromosome<>Bacillus_thuringiensis_Al_Hakam_chromosome	NC_005072_yfr3(+)_+_(hom)	3	Candidate_603_NC_007530(opp),Candidate_117_NC_007530(para),Candidate_150_NC_007530(para)	-	-	-	-B.subtilis_sigK_3(10.68|-70)B.subtilis_sigA_3(9.49|-177)
Bacillus_anthracis_Ames_0581	|	Candidate_316_NC_007530	|	GBAA2355		homoserine/threonine efflux protein, putative	*	<<<	100	|	2191138	2191196	<<<	58	|	24	<<<	GBAA2356	enoyl-CoA hydratase	*	candidate	526	6.4e-18	T		4	RNA	Bacillus_cereus_ATCC_10987_chromosome<>Bacillus_cereus_ATCC14579_chromosome<>Bacillus_thuringiensis_konkukian_chromosome<>Bacillus_cereus_ZK_chromosome	NC_002516_P8_yes(+)_+_(hom|rev)	0	-	-	-	-	-
Bacillus_anthracis_Ames_0581	|	Candidate_321_NC_007530	|	GBAA2402		hypothetical protein	*	>>>	1	|	2241235	2241481	>>>	246	|	49	<<<	GBAA2403	hypothetical protein	*	candidate	1351	8.9e-56	T		3	RNA	Bacillus_thuringiensis_konkukian_chromosome<>Bacillus_cereus_ZK_chromosome<>Bacillus_thuringiensis_Al_Hakam_chromosome	NC_002745_T1box6(+)_+_(hom)	0	Candidate_320_NC_007530(anti)	-	-	-	-
Bacillus_anthracis_Ames_0581	|	Candidate_341_NC_007530	|	GBAA2529		Frameshift	*	>>>	1	|	2353955	2354067	>>>	112	|	293	>>>	GBAA2530	transcriptional regulator, tetr family	*	candidate	1867	1.1e-78	B		4	RNA	Bacillus_cereus_ATCC14579_chromosome<>Bacillus_thuringiensis_konkukian_chromosome<>Bacillus_cereus_ZK_chromosome<>Bacillus_thuringiensis_Al_Hakam_chromosome	NC_003210_S_box3(-)_-_(hom|rev)	0	Candidate_116_NC_007530(anti)	-	-	-	-B.subtilis_sigG_1(8.91|-152)
Bacillus_anthracis_Ames_0581	|	Candidate_346_NC_007530	|	GBAA2623		hypothetical protein	*	>>>	12	|	2442656	2442894	<<<	238	|	46	<<<	GBAA2624	hypothetical protein	*	candidate	548	6.7e-19	T		5	RNA	Bacillus_cereus_ATCC_10987_chromosome<>Bacillus_cereus_ATCC14579_chromosome<>Bacillus_thuringiensis_konkukian_chromosome<>Bacillus_cereus_ZK_chromosome<>Bacillus_thuringiensis_Al_Hakam_chromosome	NC_002505_B2(-)_-_(hom|rev)	2	Candidate_19_NC_007530(anti),Candidate_215_NC_007530(para),Candidate_725_NC_007530(para)	-	-	-	-B.subtilis_sigG_1(8.34|-276)B.subtilis_sigA_2(9.31|-295)B.subtilis_sigA_3(9.9|-272)
Bacillus_anthracis_Ames_0581	|	Candidate_359_NC_007530	|	GBAA2722		hypothetical protein	*	>>>	299	|	2529541	2529853	<<<	312	|	277	>>>	GBAA2723	Frameshift	*	candidate	490	8.2e-54	T		1	RNA	Bacillus_cereus_ATCC14579_chromosome	NC_003210_rliB(+)_+_(hom)	0	-	-	-	-	-B.subtilis_sigG_3(8.38|-293)B.subtilis_sigA_1(9.74|-163)
Bacillus_anthracis_Ames_0581	|	Candidate_366_NC_007530	|	GBAA2917		hypothetical protein	*	>>>	109	|	2690581	2690700	<<<	119	|	0	<<<	GBAA2918	hypothetical protein	*	candidate	943	5e-37	B		6	RNA	Bacillus_cereus_ATCC_10987_chromosome<>Bacillus_cereus_ATCC14579_chromosome<>Bacillus_thuringiensis_konkukian_chromosome<>Bacillus_cereus_ZK_chromosome<>Bacillus_thuringiensis_Al_Hakam_chromosome<>Bacillus_cereus_cytotoxis_NVH_391-98_chromosome	NC_002745_T1box9(-)_-_(hom)	0	-	-	-	-	-
Bacillus_anthracis_Ames_0581	|	Candidate_413_NC_007530	|	GBAA3443		enhancin family protein	*	<<<	229	|	3167992	3168067	<<<	75	|	37	<<<	GBAA3444	hypothetical protein	*	candidate	918	9.4e-36	B		2	RNA	Bacillus_cereus_ATCC14579_chromosome<>Bacillus_cereus_ZK_plasmid_pE33L466	NC_003210_Purine1(-)_-_(hom|rev)	1	Candidate_29_NC_007530(anti),Candidate_124_NC_007530(para)	-	-	-	-
Bacillus_anthracis_Ames_0581	|	Candidate_432_NC_007530	|	GBAA3586		acetyltransferase, gnat family	*	>>>	2	|	3293317	3293631	>>>	314	|	-22	<<<	GBAA3587	glyoxalase family protein	*	candidate	1416	3.2e-58	T		1	RNA	Bacillus_thuringiensis_Al_Hakam_chromosome	NC_005072_yfr3(+)_+_(hom|rev)	0	-	-	-	-	-
Bacillus_anthracis_Ames_0581	|	Candidate_469_NC_007530	|	GBAA4274		n-acetylglucosamine-6-phosphate deacetylase	*	<<<	99	|	3911030	3911127	<<<	97	|	11	<<<	GBAA4275	metallo-beta-lactamase family protein	*	candidate	808	1.4e-30	T		6	RNA	Bacillus_cereus_ATCC_10987_chromosome<>Bacillus_cereus_ATCC14579_chromosome<>Bacillus_thuringiensis_konkukian_chromosome<>Bacillus_cereus_ZK_chromosome<>Bacillus_thuringiensis_Al_Hakam_chromosome<>Bacillus_cereus_cytotoxis_NVH_391-98_chromosome	NC_002745_sprC(-)_-_(hom)	0	-	-	-	-	-B.subtilis_sigA_1(10.06|-51)B.subtilis_sigA_1(10.06|-143)B.subtilis_sigA_2(9.04|-51)
Bacillus_anthracis_Ames_0581	|	Candidate_478_NC_007530	|	GBAA4538		chaperone protein dnaj	*	<<<	134	|	4127584	4127653	<<<	69	|	0	<<<	GBAA4539	molecular chaperone DnaK	*	candidate	329	5.6e-26	T		6	RNA	Bacillus_cereus_ATCC_10987_chromosome<>Bacillus_cereus_ATCC14579_chromosome<>Bacillus_thuringiensis_konkukian_chromosome<>Bacillus_cereus_ZK_chromosome<>Bacillus_thuringiensis_Al_Hakam_chromosome<>Bacillus_cereus_cytotoxis_NVH_391-98_chromosome	NC_000964_SurC(+)_+_(hom|rev)|NC_000964_SurC(+)_+_(hom)	0	-	tpke11_NC_000913|UD(5'(0-0)|3'(0-0))	3	-	-
Bacillus_anthracis_Ames_0581	|	Candidate_497_NC_007530	|	GBAA4952		aminoglycoside phosphotransferase family	*	<<<	105	|	4496917	4497046	<<<	129	|	0	<<<	GBAA4953	pullulanase, putative	*	candidate	1145	7.7e-46	T		5	RNA	Bacillus_cereus_ATCC_10987_chromosome<>Bacillus_cereus_ATCC14579_chromosome<>Bacillus_thuringiensis_konkukian_chromosome<>Bacillus_cereus_ZK_chromosome<>Bacillus_thuringiensis_Al_Hakam_chromosome	NC_003210_lhrC(+)_+_(hom|rev)	1	Candidate_140_NC_007530(para)	-	-	-	-
Bacillus_anthracis_Ames_0581	|	Candidate_521_NC_007530	|	GBAA5311		hypothetical protein	*	>>>	37	|	4815203	4815507	>>>	304	|	93	>>>	GBAA5312	hypothetical protein	*	candidate	709	2.2e-26	T		6	RNA	Bacillus_cereus_ATCC_10987_chromosome<>Bacillus_cereus_ATCC14579_chromosome<>Bacillus_thuringiensis_konkukian_chromosome<>Bacillus_cereus_ZK_chromosome<>Bacillus_thuringiensis_Al_Hakam_chromosome<>Bacillus_cereus_cytotoxis_NVH_391-98_chromosome	NC_000964_ykkC1yxkD2(-)_-_(hom)	0	-	-	-	-	-B.subtilis_sigG_2(8.7|-254)
Bacillus_anthracis_Ames_0581	|	Candidate_524_NC_007530	|	GBAA5314		tyrosyl-tRNA synthetase	*	<<<	31	|	4818865	4819197	<<<	332	|	0	<<<	GBAA5315	UDP-N-acetylenolpyruvoylglucosamine reductase	*	candidate	1787	4.9e-75	B		5	RNA	Bacillus_cereus_ATCC_10987_chromosome<>Bacillus_cereus_ATCC14579_chromosome<>Bacillus_thuringiensis_konkukian_chromosome<>Bacillus_cereus_ZK_chromosome<>Bacillus_thuringiensis_Al_Hakam_chromosome	NC_002745_T1box8(-)_-_(hom)|NC_002745_T1box1(+)_+_(hom)	0	-	T1box7_NC_003210|3'(0),T1box9_NC_002745|3'(0),T1box13_NC_000964|3'(0)	-	-	-B.subtilis_sigG_1(8.74|-298)B.subtilis_sigA_2(12.5|-255)
Bacillus_anthracis_Ames_0581	|	Candidate_555_NC_007530	|	GBAA1163		dna-binding protein	*	>>>	18	|	1134800	1135110	<<<	310	|	505	<<<	GBAA1166	hypothetical protein	*	candidate	1568	4.3e-65	Z		1	RNA	Bacillus_cereus_ATCC_10987_chromosome	NC_002745_RNAIII(-)_-_(hom|rev)	5	Candidate_247_NC_007530(opp),Candidate_228_NC_007530(para),Candidate_626_NC_007530(para),Candidate_233_NC_007530(para),Candidate_738_NC_007530(para)	-	-	-	-B.subtilis_sigG_3(9.43|-284)
Bacillus_anthracis_Ames_0581	|	Candidate_570_NC_007530	|	GBAA1448		sodium-dependent transporter, putative	*	>>>	-1	|	1371489	1371708	<<<	219	|	41	<<<	GBAA1449	peptidase, m23/m37 family	*	candidate	972	4.1e-38	Z		3	RNA	Bacillus_thuringiensis_konkukian_chromosome<>Bacillus_cereus_ZK_chromosome<>Bacillus_thuringiensis_Al_Hakam_chromosome	NC_002745_sprC(-)_-_(hom)	0	Candidate_262_NC_007530(anti)	-	-	-	-B.subtilis_sigG_2(8.64|-149)
Bacillus_anthracis_Ames_0581	|	Candidate_577_NC_007530	|	GBAA1589		macrolide 2-phosphotransferase, putative	*	<<<	102	|	1496400	1496830	<<<	430	|	0	>>>	GBAA1590	methionine aminopeptidase	*	candidate	2526	1.4e-108	X		3	RNA	Bacillus_thuringiensis_konkukian_chromosome<>Bacillus_cereus_ZK_chromosome<>Bacillus_thuringiensis_Al_Hakam_chromosome	NC_003210_rliB(+)_+_(hom|rev)	0	-	-	-	-	-B.subtilis_sigG_3(9.3|-286)
Bacillus_anthracis_Ames_0581	|	Candidate_582_NC_007530	|	GBAA1834		polysaccharide biosynthesis family protein	*	<<<	65	|	1720974	1721462	>>>	488	|	190	>>>	GBAA1835	sodium-dependent transporter	*	candidate	2817	7e-122	X		1	RNA	Bacillus_cereus_ATCC14579_chromosome	NC_000964_T1box1(+)_+_(hom)|NC_003210_T1box1(+)_+_(hom)|NC_000964_T1box5(+)_+_(hom)|NC_000964_T1box13(-)_-_(hom)|NC_003210_T1box14(-)_-_(hom)|NC_002745_T1box7(-)_-_(hom)|NC_002745_T1box8(-)_-_(hom)|NC_000964_T1box7(-)_-_(hom)|NC_003210_T1box7(-)_-_(hom)|NC_000964_T1box18(+)_+_(hom)|NC_003210_T1box13(+)_+_(hom)|NC_002745_T1box4(+)_+_(hom)|NC_000964_T1box9(-)_-_(hom)	9	T-box_NC_007530(para),T-box_NC_007530(para),T-box_NC_007530(para),Candidate_592_NC_007530(para),T-box_NC_007530(para),T-box_NC_007530(para),T-box_NC_007530(para),T-box_NC_007530(para),T-box_NC_007530(para)	-	-	-	-B.subtilis_sigG_2(8.44|-390)
Bacillus_anthracis_Ames_0581	|	Candidate_592_NC_007530	|	GBAA0011		glutamine amidotransferase, sno family	*	>>>	61	|	20072	20308	>>>	236	|	29	>>>	GBAA0012	seryl-tRNA synthetase	*	candidate	197	9.3e-16	Z		8	RNA	Bacillus_halodurans_chromosome<>Bacillus_cereus_ATCC_10987_chromosome<>Oceanobacillus_iheyensis_chromosome<>Bacillus_cereus_ATCC14579_chromosome<>Bacillus_thuringiensis_konkukian_chromosome<>Bacillus_cereus_ZK_chromosome<>Bacillus_thuringiensis_Al_Hakam_chromosome<>Bacillus_cereus_cytotoxis_NVH_391-98_chromosome	NC_000964_T1box1(+)_+_(hom)|NC_003210_T1box14(-)_-_(hom)|NC_002745_T1box1(+)_+_(hom)|NC_003210_T1box12(+)_+_(hom)|NC_003210_T1box7(-)_-_(hom)|NC_000964_T1box2(+)_+_(hom)|NC_000964_T1box9(-)_-_(hom)|NC_000964_T1box7(-)_-_(hom)	8	Candidate_582_NC_007530(para),T-box_NC_007530(para),T-box_NC_007530(para),T-box_NC_007530(para),T-box_NC_007530(para),T-box_NC_007530(para),Candidate_10_NC_007530(para),T-box_NC_007530(para)	T1box1_NC_000964|UD(5'(0-0)|3'(1-1)),T1box14_NC_003210|3'(0),T1box1_NC_002745|3'(0)	5	RS	-
Bacillus_anthracis_Ames_0581	|	Candidate_619_NC_007530	|	GBAA2947		sulfatase	*	<<<	22	|	2713254	2713740	>>>	486	|	7	<<<	GBAA2948	abc transporter, atp-binding protein	*	candidate	2402	6e-103	X		1	RNA	Bacillus_thuringiensis_Al_Hakam_chromosome	NC_002745_RFN1(-)_-_(hom|rev)|NC_002745_RNAIII(-)_-_(hom|rev)	0	-	-	-	-	-B.subtilis_sigG_1(8.08|-379)
Bacillus_anthracis_Ames_0581	|	Candidate_620_NC_007530	|	GBAA2948		abc transporter, atp-binding protein	*	<<<	305	|	2715679	2715731	<<<	52	|	19	<<<	GBAA2949	hypothetical protein	*	candidate	1722	4.2e-72	Z		5	RNA	Bacillus_cereus_ATCC_10987_chromosome<>Bacillus_cereus_ATCC14579_chromosome<>Bacillus_thuringiensis_konkukian_chromosome<>Bacillus_cereus_ZK_chromosome<>Bacillus_thuringiensis_Al_Hakam_chromosome	NC_003210_rliB(+)_+_(hom)	0	Candidate_621_NC_007530(anti)	-	3	-	-B.subtilis_sigG_3(8.38|-133)
Bacillus_anthracis_Ames_0581	|	Candidate_621_NC_007530	|	GBAA2948		abc transporter, atp-binding protein	*	<<<	1	|	2715375	2715713	>>>	338	|	37	<<<	GBAA2949	hypothetical protein	*	candidate	1722	4.2e-72	X		5	RNA	Bacillus_cereus_ATCC_10987_chromosome<>Bacillus_cereus_ATCC14579_chromosome<>Bacillus_thuringiensis_konkukian_chromosome<>Bacillus_cereus_ZK_chromosome<>Bacillus_thuringiensis_Al_Hakam_chromosome	NC_003210_rliB(+)_+_(hom|rev)	0	Candidate_620_NC_007530(anti)	-	-	-	-B.subtilis_sigA_1(9.06|-474)
Bacillus_anthracis_Ames_0581	|	Candidate_623_NC_007530	|	GBAA0022		hypothetical protein	*	>>>	-4	|	28396	28548	<<<	152	|	65	>>>	GBAA0024	sigma-k factor processing regulatory protein	*	candidate	688	5.2e-25	X		3	RNA	Bacillus_thuringiensis_konkukian_chromosome<>Bacillus_cereus_ZK_chromosome<>Bacillus_thuringiensis_Al_Hakam_chromosome	NC_003210_rliE(+)_+_(hom|rev)	0	-	-	-	-	-
Bacillus_anthracis_Ames_0581	|	Candidate_632_NC_007530	|	GBAA3522		hypothetical protein	*	<<<	291	|	3232931	3233234	<<<	303	|	35	<<<	GBAA3523	hypothetical protein	*	candidate	773	1.9e-29	Y		4	RNA	Bacillus_cereus_ATCC14579_chromosome<>Bacillus_thuringiensis_konkukian_chromosome<>Bacillus_cereus_ZK_chromosome<>Bacillus_thuringiensis_Al_Hakam_chromosome	NC_002745_RFN1(-)_-_(hom)	3	Candidate_31_NC_007530(anti),Candidate_633_NC_007530(anti),Candidate_234_NC_007530(para),Candidate_738_NC_007530(para),Candidate_117_NC_007530(para)	-	-	-	-B.subtilis_sigG_3(8.08|-186)
Bacillus_anthracis_Ames_0581	|	Candidate_633_NC_007530	|	GBAA3522		hypothetical protein	*	<<<	331	|	3232971	3233209	>>>	238	|	60	<<<	GBAA3523	hypothetical protein	*	candidate	773	1.9e-29	X		1	RNA	Bacillus_cereus_ATCC14579_chromosome	NC_002745_RFN1(-)_-_(hom|rev)	4	Candidate_31_NC_007530(tandem),Candidate_632_NC_007530(anti),Candidate_234_NC_007530(para),Candidate_738_NC_007530(para),Candidate_117_NC_007530(para)	-	-	-	-B.subtilis_sigG_3(8.05|-84)
Bacillus_anthracis_Ames_0581	|	Candidate_660_NC_007530	|	GBAA4179		hypothetical protein	*	<<<	1	|	3827287	3827513	>>>	226	|	9	<<<	GBAA4181	dihydrolipoamide dehydrogenase	*	candidate	1158	9.8e-47	F		4	RNA	Bacillus_cereus_ATCC14579_chromosome<>Bacillus_thuringiensis_konkukian_chromosome<>Bacillus_cereus_ZK_chromosome<>Bacillus_thuringiensis_Al_Hakam_chromosome	NC_000964_T1box13(-)_-_(hom|rev)	4	Candidate_29_NC_007530(para),Candidate_367_NC_007530(para),Candidate_17_NC_007530(para),Candidate_384_NC_007530(para)	-	-	-	-B.subtilis_sigG_2(8.01|-330)
Bacillus_anthracis_Ames_0581	|	Candidate_664_NC_007530	|	GBAA4344		hypothetical protein	*	>>>	24	|	3965098	3965177	>>>	79	|	143	>>>	GBAA4345	na+/h+ antiporter nhac	*	candidate	264	1.4e-21	Z		6	RNA	Bacillus_cereus_ATCC_10987_chromosome<>Bacillus_cereus_ATCC14579_chromosome<>Bacillus_thuringiensis_konkukian_chromosome<>Bacillus_cereus_ZK_chromosome<>Bacillus_thuringiensis_Al_Hakam_chromosome<>Bacillus_cereus_cytotoxis_NVH_391-98_chromosome	NC_000964_T1box13(-)_-_(hom)|NC_002745_T1box7(-)_-_(hom)|NC_003210_T1box7(-)_-_(hom)|NC_002745_T1box8(-)_-_(hom)	4	T-box_NC_007530(para),T-box_NC_007530(para),T-box_NC_007530(para),T-box_NC_007530(para)	-	-	-	-
Bacillus_anthracis_Ames_0581	|	Candidate_665_NC_007530	|	GBAA4381		cell division protein, ftsw/roda/spove family	*	<<<	19	|	3995140	3995461	>>>	321	|	0	<<<	GBAA4382	dihydrolipoamide acetyltransferase	*	candidate	1588	5.3e-66	X		5	RNA	Bacillus_cereus_ATCC_10987_chromosome<>Bacillus_thuringiensis_konkukian_chromosome<>Bacillus_cereus_ZK_chromosome<>Bacillus_thuringiensis_Al_Hakam_chromosome<>Bacillus_cereus_cytotoxis_NVH_391-98_chromosome	NC_002745_sprC(-)_-_(hom|rev)	0	-	-	-	-	-
Bacillus_anthracis_Ames_0581	|	Candidate_724_NC_007530	|	GBAA0579		malate dehydrogenase, putative	*	>>>	3	|	589687	589959	<<<	272	|	19	<<<	GBAA0580	lipoprotein, putative	*	candidate	561	1.1e-19	Z		5	RNA	Bacillus_cereus_ATCC_10987_chromosome<>Bacillus_cereus_ATCC14579_chromosome<>Bacillus_thuringiensis_konkukian_chromosome<>Bacillus_cereus_ZK_chromosome<>Bacillus_thuringiensis_Al_Hakam_chromosome	NC_002745_T1box4(+)_+_(hom)	2	Candidate_143_NC_007530(para),Candidate_212_NC_007530(para)	-	-	-	-B.subtilis_sigG_2(9.09|-323)
Bacillus_anthracis_Ames_0581	|	Candidate_734_NC_007530	|	GBAA0949		protein-export membrane protein-related protein	*	>>>	1	|	954999	955277	>>>	278	|	67	<<<	GBAA0950	hypothetical protein	*	candidate	1580	1.2e-65	Z		5	RNA	Bacillus_cereus_ATCC_10987_chromosome<>Bacillus_cereus_ATCC14579_chromosome<>Bacillus_thuringiensis_konkukian_chromosome<>Bacillus_cereus_ZK_chromosome<>Bacillus_thuringiensis_Al_Hakam_chromosome	NC_002505_B2(-)_-_(hom|rev)	2	Candidate_227_NC_007530(anti),Candidate_735_NC_007530(para),Candidate_229_NC_007530(para)	-	-	-	-B.subtilis_sigG_1(8.21|-181)
Bacillus_anthracis_Ames_0581	|	Purine_NC_007530	|	GBAA0268		bifunctional GMP synthase/glutamine	*	>>>	19	|	262466	262758	>>>	292	|	72	>>>	GBAA0270	xanthine/uracil permease family protein	*	Purine	1156	1.5e-46	R		5	RNA	Bacillus_cereus_ATCC14579_chromosome<>Bacillus_thuringiensis_konkukian_chromosome<>Bacillus_cereus_ZK_chromosome<>Bacillus_thuringiensis_Al_Hakam_chromosome<>Bacillus_cereus_cytotoxis_NVH_391-98_chromosome	NC_000964_Purine4(-)_-_(hom)|NC_000964_Purine2(+)_+_(hom)|NC_000964_Purine3(+)_+_(hom)|NC_000964_Purine5(+)_+_(hom)|NC_003210_Purine2(-)_-_(hom)|NC_002745_Purine(+)_+_(hom)	1	Purine_NC_007530(para)	Purine2_NC_000964|UD(5'(0-0)|3'(0-0)),Purine1_NC_003210|3'(0),Purine2_NC_003210|3'(0),Purine4_NC_000964|3'(0),Purine_NC_002745|3'(0)	5	RS	-B.subtilis_sigG_3(9.3|-142)B.subtilis_sigA_2(9.46|-174)
Bacillus_anthracis_Ames_0581	|	TPP_NC_007530	|	GBAA0724		peptidase, m23/m37 family	*	<<<	1	|	751831	752249	>>>	418	|	210	>>>	GBAA0725	transcriptional activator tena, putative	*	TPP	152	1.6e-17	R		5	RNA	Bacillus_cereus_ATCC_10987_chromosome<>Bacillus_thuringiensis_konkukian_chromosome<>Bacillus_cereus_ZK_chromosome<>Bacillus_thuringiensis_Al_Hakam_chromosome<>Bacillus_cereus_cytotoxis_NVH_391-98_chromosome	NC_002745_THI1(-)_-_(hom)|NC_000913_THI1(-)_-_(hom)	2	TPP_NC_007530(para),TPP_NC_007530(para)	THI2_NC_000964|3'(0),THI1_NC_000964|3'(0),THI1_NC_002505|3'(0),THI2_NC_000913|3'(0),THI_NC_002516|3'(0),THI1_NC_003112|3'(0),THI_NC_005072|3'(0)	-	-	-
Bacillus_anthracis_Ames_0581	|	FMN_NC_007530	|	GBAA1501		hypothetical protein	*	<<<	2	|	1422442	1422909	>>>	467	|	79	>>>	GBAA1502	hypothetical protein	*	FMN	658	3.2e-24	R		8	RNA	Bacillus_cereus_ATCC_10987_chromosome<>Bacillus_cereus_ATCC14579_chromosome<>Bacillus_thuringiensis_konkukian_chromosome<>Bacillus_licheniformis_ATCC_14580_chromosome<>Bacillus_cereus_ZK_chromosome<>Bacillus_licheniformis_DSM_13_chromosome<>Bacillus_thuringiensis_Al_Hakam_chromosome<>Bacillus_cereus_cytotoxis_NVH_391-98_chromosome	NC_002745_RFN1(-)_-_(hom)|NC_000964_RFN2(-)_-_(hom)|NC_002745_RFN2(-)_-_(hom)|NC_003210_RFN(-)_-_(hom)	1	Candidate_663_NC_007530(para)	RFN1_NC_000964|3'(0)	5	RS	-B.subtilis_sigA_2(11.28|-242)
Bacillus_anthracis_Ames_0581	|	SAM_NC_007530	|	GBAA2639		aspartate racemase family protein	*	<<<	135	|	2459466	2459644	>>>	178	|	94	>>>	GBAA2640	hypothetical protein	*	SAM	1289	2e-52	R		5	RNA	Bacillus_cereus_ATCC_10987_chromosome<>Bacillus_cereus_ATCC14579_chromosome<>Bacillus_thuringiensis_konkukian_chromosome<>Bacillus_cereus_ZK_chromosome<>Bacillus_thuringiensis_Al_Hakam_chromosome	NC_000964_S_box2(+)_+_(hom)|NC_003210_S_box7(-)_-_(hom)|NC_000964_S_box10(+)_+_(hom)|NC_003210_S_box2(-)_-_(hom)|NC_003210_S_box5(-)_-_(hom)|NC_000964_S_box7(-)_-_(hom)|NC_000964_S_box11(+)_+_(hom)|NC_003210_S_box3(-)_-_(hom)|NC_000964_S_box9(-)_-_(hom)|NC_002745_S_box4(-)_-_(hom)|NC_000964_S_box8(-)_-_(hom)	9	Candidate_110_NC_007530(anti),Candidate_97_NC_007530(para),SAM_NC_007530(para),SAM_NC_007530(para),SAM_NC_007530(para),SAM_NC_007530(para),SAM_NC_007530(para),Candidate_25_NC_007530(para),SAM_NC_007530(para),SAM_NC_007530(para)	S_box2_NC_003210|UD(5'(1-1)|3'(0-0)),S_box4_NC_000964|UD(5'(1-1)|3'(0-0)),S_box5_NC_000964|UD(5'(1-1)|3'(0-1)),S_box9_NC_000964|UD(5'(1-1)|3'(0-0)),S_box4_NC_002745|3'(0),S_box1_NC_000964|3'(0),S_box2_NC_000964|3'(0),T1box2_NC_002745|3'(0),S_box3_NC_003210|3'(0),S_box7_NC_003210|3'(0),S_box2_NC_002745|3'(0)	-	RS	-
Bacillus_anthracis_Ames_0581	|	SAM_NC_007530	|	GBAA4479		bifunctional homocysteine	*	<<<	317	|	4074345	4074560	>>>	215	|	53	>>>	GBAA4480	cystathionine beta-lyase	*	SAM	1222	2.2e-49	R		1	RNA	Bacillus_cereus_ATCC14579_chromosome	NC_003210_S_box3(-)_-_(hom)|NC_000964_S_box1(-)_-_(hom)|NC_003210_S_box6(-)_-_(hom)|NC_002745_S_box2(+)_+_(hom)|NC_000964_S_box2(+)_+_(hom)|NC_003210_S_box2(-)_-_(hom)|NC_000964_S_box11(+)_+_(hom)|NC_000964_S_box7(-)_-_(hom)|NC_000964_S_box10(+)_+_(hom)|NC_002745_S_box4(-)_-_(hom)|NC_003210_S_box5(-)_-_(hom)|NC_003210_S_box3(-)_-_(hom|rev)|NC_000964_S_box9(-)_-_(hom)|NC_000964_S_box1(-)_-_(hom|re…	8	Candidate_62_NC_007530(tandem),Candidate_97_NC_007530(anti),SAM_NC_007530(anti),SAM_NC_007530(para),Candidate_110_NC_007530(para),SAM_NC_007530(para),Candidate_25_NC_007530(para),SAM_NC_007530(para),SAM_NC_007530(para),SAM_NC_007530(para)	S_box2_NC_003210|UD(5'(1-1)|3'(0-0)),S_box4_NC_000964|UD(5'(1-1)|3'(0-0)),S_box5_NC_000964|UD(5'(1-1)|3'(0-1)),S_box9_NC_000964|UD(5'(1-1)|3'(0-0)),S_box4_NC_002745|3'(0),S_box1_NC_000964|3'(0),S_box2_NC_000964|3'(0),T1box2_NC_002745|3'(0),S_box3_NC_003210|3'(0),S_box7_NC_003210|3'(0),S_box2_NC_002745|3'(0)	5	RS	-B.subtilis_sigG_3(8.3|-228)
Bacillus_anthracis_Ames_0581	|	T-box_NC_007530	|	GBAA3408		tryptophanyl-tRNA synthetase	*	<<<	29	|	3133402	3133487	<<<	85	|	275	>>>	GBAA3409	1-deoxy-D-xylulose 5-phosphate reductoisomerase	*	T-box	200	5.3e-17	R		5	RNA	Bacillus_cereus_ATCC_10987_chromosome<>Bacillus_cereus_ATCC14579_chromosome<>Bacillus_thuringiensis_konkukian_chromosome<>Bacillus_cereus_ZK_chromosome<>Bacillus_thuringiensis_Al_Hakam_chromosome	NC_000964_T1box1(+)_+_(hom)|NC_000964_T1box13(-)_-_(hom)|NC_000964_T1box14(-)_-_(hom)|NC_003210_T1box1(+)_+_(hom)|NC_003210_T1box5(-)_-_(hom)|NC_000964_T1box2(+)_+_(hom)|NC_000964_T1box4(+)_+_(hom)|NC_000964_T1box18(+)_+_(hom)|NC_000964_T1box6(+)_+_(hom)|NC_002745_T1box4(+)_+_(hom)|NC_002745_T1box7(-)_-_(hom)|NC_003210_T1box9(-)_-_(hom)|NC_000964_T1box8(-)_-_(hom)|NC_003210_T1box10(-)_-_(hom)	7	T-box_NC_007530(para),T-box_NC_007530(para),T-box_NC_007530(para),T-box_NC_007530(para),T-box_NC_007530(para),T-box_NC_007530(para),T-box_NC_007530(para)	T1box3_NC_000964|UD(5'(1-1)|3'(0-0)),T1box12_NC_003210|UD(5'(1-1)|3'(0-0)),T1box4_NC_002745|UD(5'(0-0)|3'(0-0)),T1box7_NC_003210|UD(5'(1-1)|3'(0-0)),T1box5_NC_000964|UD(5'(0-0)|3'(0-0)),T1box8_NC_000964|UD(5'(1-1)|3'(0-0)),T1box10_NC_000964|UD(5'(0-0)|3'(1-1)),Lysine2_NC_002745|UD(5'(1-1)|3'(1-1)),T1box12_NC_000964|UD(5'(0-0)|3'(0-0)),T1box6_NC_003210|UD(5'(1-0)|3'(0-0)),T1box8_NC_002745|UD(5'(1-…	5	RS	-
Bacillus_anthracis_Ames_0581	|	SRP_bact_NC_007530	|	GBAA0018		cytidine/deoxycytidylate deaminase zinc-binding	*	>>>	81	|	25117	25428	>>>	311	|	83	>>>	GBAA0019	DNA polymerase III subunits gamma and tau	*	SRP_bact	825	1.1e-31	B		58	RNA	Bacillus_subtilis_chromosome<>Bacillus_halodurans_chromosome<>Staphylococcus_aureus_N315_chromosome<>Staphylococcus_aureus_Mu50_chromosome<>Staphylococcus_aureus_COL_chromosome<>Staphylococcus_aureus_aureus_MRSA252_chromosome<>Staphylococcus_aureus_aureus_MSSA476_chromosome<>Listeria_monocytogenes_4b_F2365_chromosome<>Staphylococcus_epidermidis_RP62A_chromosome<>Clostridium_acetobutylicum_chromos…	NC_000964_SRP_bact(+)_+_(hom)|NC_002745_SRP_bact(+)_+_(hom)|NC_003210_SRP_bact(-)_-_(hom)|NC_002516_SRP_bact(+)_+_(hom)|NC_000913_ffs_SRP(+)_+_(hom)|NC_002505_SRP_bact(+)_+_(hom)|NC_003047_SRP_bact(+)_+_(hom)	0	-	SRP_bact_NC_000964|UD(5'(0-0)|3'(0-0)),SRP_bact_NC_003047|3'(0)	-	-	-
Bacillus_anthracis_Ames_0581	|	SAM_NC_007530	|	GBAA0195		oligopeptide abc transporter,	*	<<<	54	|	197003	197338	<<<	335	|	1	<<<	GBAA0196	oxidoreductase, aldo/keto reductase family	*	SAM	1739	6.7e-73	T		5	RNA	Bacillus_cereus_ATCC_10987_chromosome<>Bacillus_cereus_ATCC14579_chromosome<>Bacillus_thuringiensis_konkukian_chromosome<>Bacillus_cereus_ZK_chromosome<>Bacillus_thuringiensis_Al_Hakam_chromosome	NC_003210_S_box6(-)_-_(hom)|NC_000964_S_box9(-)_-_(hom)|NC_003210_S_box3(-)_-_(hom)|NC_000964_S_box2(+)_+_(hom)|NC_000964_S_box11(+)_+_(hom)|NC_000964_S_box7(-)_-_(hom)|NC_002745_S_box4(-)_-_(hom)|NC_000964_S_box10(+)_+_(hom)|NC_002745_S_box3(-)_-_(hom)|NC_003210_S_box2(-)_-_(hom)|NC_000964_S_box1(-)_-_(hom)	10	Candidate_25_NC_007530(para),SAM_NC_007530(para),SAM_NC_007530(para),SAM_NC_007530(para),SAM_NC_007530(para),SAM_NC_007530(para),SAM_NC_007530(para),SAM_NC_007530(para),Candidate_110_NC_007530(para),SAM_NC_007530(para)	S_box2_NC_003210|UD(5'(1-1)|3'(0-0)),S_box4_NC_000964|UD(5'(1-1)|3'(0-0)),S_box5_NC_000964|UD(5'(1-1)|3'(0-1)),S_box9_NC_000964|UD(5'(1-1)|3'(0-0)),S_box4_NC_002745|3'(0),S_box1_NC_000964|3'(0),S_box2_NC_000964|3'(0),T1box2_NC_002745|3'(0),S_box3_NC_003210|3'(0),S_box7_NC_003210|3'(0),S_box2_NC_002745|3'(0)	-	RS	-B.subtilis_sigA_2(10.07|-234)
Bacillus_anthracis_Ames_0581	|	Purine_NC_007530	|	GBAA0267		chaperonin GroEL	*	>>>	30	|	260531	260833	>>>	302	|	74	>>>	GBAA0268	bifunctional GMP synthase/glutamine	*	Purine	1383	7.2e-57	T		6	RNA	Bacillus_cereus_ATCC_10987_chromosome<>Bacillus_cereus_ATCC14579_chromosome<>Bacillus_thuringiensis_konkukian_chromosome<>Bacillus_cereus_ZK_chromosome<>Bacillus_thuringiensis_Al_Hakam_chromosome<>Bacillus_cereus_cytotoxis_NVH_391-98_chromosome	NC_003210_Purine2(-)_-_(hom)	0	-	Purine2_NC_000964|UD(5'(0-0)|3'(0-0)),Purine1_NC_003210|3'(0),Purine2_NC_003210|3'(0),Purine4_NC_000964|3'(0),Purine_NC_002745|3'(0)	5	-	-
Bacillus_anthracis_Ames_0581	|	TPP_NC_007530	|	GBAA0379		methyl-accepting chemotaxis protein	*	>>>	10	|	399268	399484	>>>	216	|	36	>>>	GBAA0380	hypothetical protein	*	TPP	1161	1.3e-46	B		6	RNA	Bacillus_cereus_ATCC_10987_chromosome<>Bacillus_cereus_ATCC14579_chromosome<>Bacillus_thuringiensis_konkukian_chromosome<>Bacillus_cereus_ZK_chromosome<>Bacillus_thuringiensis_Al_Hakam_chromosome<>Bacillus_cereus_cytotoxis_NVH_391-98_chromosome	NC_000913_THI1(-)_-_(hom)|NC_000964_THI3(-)_-_(hom)|NC_000964_THI4(+)_+_(hom)|NC_003047_THI(+)_+_(hom)|NC_000964_THI1(+)_+_(hom)	3	TPP_NC_007530(para),TPP_NC_007530(para),TPP_NC_007530(para)	THI2_NC_000964|3'(0),THI1_NC_000964|3'(0),THI1_NC_002505|3'(0),THI2_NC_000913|3'(0),THI_NC_002516|3'(0),THI1_NC_003112|3'(0),THI_NC_005072|3'(0)	5	RS	-
Bacillus_anthracis_Ames_0581	|	ydaO-yuaA_NC_007530	|	GBAA0737		hypothetical protein	*	>>>	8	|	761316	761607	>>>	291	|	45	>>>	GBAA0738	hypothetical protein	*	ydaO-yuaA	1243	8.5e-51	B		6	RNA	Bacillus_cereus_ATCC_10987_chromosome<>Bacillus_cereus_ATCC14579_chromosome<>Bacillus_thuringiensis_konkukian_chromosome<>Bacillus_cereus_ZK_chromosome<>Bacillus_thuringiensis_Al_Hakam_chromosome<>Bacillus_cereus_cytotoxis_NVH_391-98_chromosome	NC_000964_ydaO1yuaA1(+)_+_(hom)|NC_000964_ydaO1yuaA2(+)_+_(hom)	0	-	-	5	-	-
Bacillus_anthracis_Ames_0581	|	T-box_NC_007530	|	GBAA1188		tryptophanyl-tRNA synthetase	*	<<<	49	|	1152460	1152721	<<<	261	|	86	<<<	GBAA1189	hypothetical protein	*	T-box	524	2.7e-18	T		10	RNA	Bacillus_subtilis_chromosome<>Bacillus_cereus_ATCC_10987_chromosome<>Bacillus_cereus_ATCC14579_chromosome<>Bacillus_thuringiensis_konkukian_chromosome<>Bacillus_licheniformis_ATCC_14580_chromosome<>Bacillus_cereus_ZK_chromosome<>Bacillus_licheniformis_DSM_13_chromosome<>Bacillus_thuringiensis_Al_Hakam_chromosome<>Bacillus_cereus_cytotoxis_NVH_391-98_chromosome<>Bacillus_amyloliquefaciens_FZB42_ch…	NC_000964_T1box3(-)_-_(hom)|NC_002745_T1box1(+)_+_(hom)|NC_002745_T1box4(+)_+_(hom)|NC_000964_T1box5(+)_+_(hom)|NC_003210_T1box4(-)_-_(hom)|NC_000964_T1box8(-)_-_(hom)|NC_000964_T1box14(-)_-_(hom)|NC_003210_T1box1(+)_+_(hom)|NC_002745_T1box8(-)_-_(hom)|NC_000964_T1box6(+)_+_(hom)	7	T-box_NC_007530(para),T-box_NC_007530(para),T-box_NC_007530(para),Candidate_582_NC_007530(para),T-box_NC_007530(para),T-box_NC_007530(para),T-box_NC_007530(para)	T1box3_NC_000964|UD(5'(1-1)|3'(0-0)),T1box12_NC_003210|UD(5'(1-1)|3'(0-0)),T1box4_NC_002745|UD(5'(0-0)|3'(0-0)),T1box7_NC_003210|UD(5'(1-1)|3'(0-0)),T1box5_NC_000964|UD(5'(0-0)|3'(0-0)),T1box8_NC_000964|UD(5'(1-1)|3'(0-0)),T1box10_NC_000964|UD(5'(0-0)|3'(1-1)),Lysine2_NC_002745|UD(5'(1-1)|3'(1-1)),T1box12_NC_000964|UD(5'(0-0)|3'(0-0)),T1box6_NC_003210|UD(5'(1-0)|3'(0-0)),T1box8_NC_002745|UD(5'(1-…	-	RS	-B.subtilis_sigA_1(10.48|-319)
Bacillus_anthracis_Ames_0581	|	T-box_NC_007530	|	GBAA1247		hypothetical protein	*	>>>	1	|	1202772	1202857	>>>	85	|	319	>>>	GBAA1248	anthranilate synthase component I	*	T-box	1114	2.4e-45	T		6	RNA	Oceanobacillus_iheyensis_chromosome<>Bacillus_cereus_ATCC14579_chromosome<>Bacillus_thuringiensis_konkukian_chromosome<>Bacillus_cereus_ZK_chromosome<>Bacillus_thuringiensis_Al_Hakam_chromosome<>Bacillus_cereus_cytotoxis_NVH_391-98_chromosome	NC_003210_T1box8(-)_-_(hom)|NC_003210_T1box9(-)_-_(hom)|NC_003210_T1box12(+)_+_(hom)	3	T-box_NC_007530(tandem),T-box_NC_007530(para),T-box_NC_007530(para)	T1box3_NC_000964|UD(5'(1-1)|3'(0-0)),T1box12_NC_003210|UD(5'(1-1)|3'(0-0)),T1box4_NC_002745|UD(5'(0-0)|3'(0-0)),T1box7_NC_003210|UD(5'(1-1)|3'(0-0)),T1box5_NC_000964|UD(5'(0-0)|3'(0-0)),T1box8_NC_000964|UD(5'(1-1)|3'(0-0)),T1box10_NC_000964|UD(5'(0-0)|3'(1-1)),Lysine2_NC_002745|UD(5'(1-1)|3'(1-1)),T1box12_NC_000964|UD(5'(0-0)|3'(0-0)),T1box6_NC_003210|UD(5'(1-0)|3'(0-0)),T1box8_NC_002745|UD(5'(1-…	-	-	-
Bacillus_anthracis_Ames_0581	|	T-box_NC_007530	|	GBAA1247		hypothetical protein	*	>>>	96	|	1202867	1203149	>>>	282	|	27	>>>	GBAA1248	anthranilate synthase component I	*	T-box	767	5e-29	T		6	RNA	Bacillus_cereus_ATCC_10987_chromosome<>Bacillus_cereus_ATCC14579_chromosome<>Bacillus_thuringiensis_konkukian_chromosome<>Bacillus_cereus_ZK_chromosome<>Bacillus_thuringiensis_Al_Hakam_chromosome<>Bacillus_cereus_cytotoxis_NVH_391-98_chromosome	NC_003210_T1box8(-)_-_(hom)|NC_003210_T1box9(-)_-_(hom)|NC_003210_T1box12(+)_+_(hom)	3	T-box_NC_007530(tandem),T-box_NC_007530(para),T-box_NC_007530(para)	T1box3_NC_000964|UD(5'(1-1)|3'(0-0)),T1box12_NC_003210|UD(5'(1-1)|3'(0-0)),T1box4_NC_002745|UD(5'(0-0)|3'(0-0)),T1box7_NC_003210|UD(5'(1-1)|3'(0-0)),T1box5_NC_000964|UD(5'(0-0)|3'(0-0)),T1box8_NC_000964|UD(5'(1-1)|3'(0-0)),T1box10_NC_000964|UD(5'(0-0)|3'(1-1)),Lysine2_NC_002745|UD(5'(1-1)|3'(1-1)),T1box12_NC_000964|UD(5'(0-0)|3'(0-0)),T1box6_NC_003210|UD(5'(1-0)|3'(0-0)),T1box8_NC_002745|UD(5'(1-…	5	RS	-
Bacillus_anthracis_Ames_0581	|	T-box_NC_007530	|	GBAA1447		precorrin-2 dehydrogenase	*	>>>	4	|	1369717	1370051	>>>	334	|	82	>>>	GBAA1448	sodium-dependent transporter, putative	*	T-box	1584	6.2e-66	T		6	RNA	Bacillus_cereus_ATCC_10987_chromosome<>Bacillus_cereus_ATCC14579_chromosome<>Bacillus_thuringiensis_konkukian_chromosome<>Bacillus_cereus_ZK_chromosome<>Bacillus_thuringiensis_Al_Hakam_chromosome<>Bacillus_cereus_cytotoxis_NVH_391-98_chromosome	NC_003210_T1box11(-)_-_(hom)|NC_003210_T1box9(-)_-_(hom)|NC_003210_T1box7(-)_-_(hom)	3	T-box_NC_007530(para),T-box_NC_007530(para),T-box_NC_007530(para)	T1box3_NC_000964|UD(5'(1-1)|3'(0-0)),T1box12_NC_003210|UD(5'(1-1)|3'(0-0)),T1box4_NC_002745|UD(5'(0-0)|3'(0-0)),T1box7_NC_003210|UD(5'(1-1)|3'(0-0)),T1box5_NC_000964|UD(5'(0-0)|3'(0-0)),T1box8_NC_000964|UD(5'(1-1)|3'(0-0)),T1box10_NC_000964|UD(5'(0-0)|3'(1-1)),Lysine2_NC_002745|UD(5'(1-1)|3'(1-1)),T1box12_NC_000964|UD(5'(0-0)|3'(0-0)),T1box6_NC_003210|UD(5'(1-0)|3'(0-0)),T1box8_NC_002745|UD(5'(1-…	-	RS	-B.subtilis_sigA_2(11.28|-295)
Bacillus_anthracis_Ames_0581	|	SAM_NC_007530	|	GBAA1451		hypothetical protein	*	>>>	1	|	1375355	1375632	>>>	277	|	42	>>>	GBAA1452	na+/h+ antiporter family protein	*	SAM	1305	4e-53	B		4	RNA	Bacillus_cereus_ATCC14579_chromosome<>Bacillus_thuringiensis_konkukian_chromosome<>Bacillus_cereus_ZK_chromosome<>Bacillus_thuringiensis_Al_Hakam_chromosome	NC_000964_S_box11(+)_+_(hom)|NC_000964_S_box7(-)_-_(hom)|NC_000964_S_box9(-)_-_(hom)|NC_000964_S_box10(+)_+_(hom)|NC_003210_S_box3(-)_-_(hom)|NC_003210_S_box6(-)_-_(hom)|NC_000964_S_box2(+)_+_(hom)|NC_000964_S_box1(-)_-_(hom)|NC_002745_S_box4(-)_-_(hom)|NC_003210_S_box4(+)_+_(hom)|NC_003210_S_box2(-)_-_(hom)	7	Candidate_25_NC_007530(para),SAM_NC_007530(para),SAM_NC_007530(para),Candidate_97_NC_007530(para),SAM_NC_007530(para),SAM_NC_007530(para),SAM_NC_007530(para)	S_box2_NC_003210|UD(5'(1-1)|3'(0-0)),S_box4_NC_000964|UD(5'(1-1)|3'(0-0)),S_box5_NC_000964|UD(5'(1-1)|3'(0-1)),S_box9_NC_000964|UD(5'(1-1)|3'(0-0)),S_box4_NC_002745|3'(0),S_box1_NC_000964|3'(0),S_box2_NC_000964|3'(0),T1box2_NC_002745|3'(0),S_box3_NC_003210|3'(0),S_box7_NC_003210|3'(0),S_box2_NC_002745|3'(0)	5	RS	-B.subtilis_sigA_2(9.27|-196)
Bacillus_anthracis_Ames_0581	|	Purine_NC_007530	|	GBAA1590		methionine aminopeptidase	*	>>>	141	|	1497719	1497878	>>>	159	|	24	>>>	GBAA1591	xanthine phosphoribosyltransferase	*	Purine	915	2.3e-35	T		6	RNA	Bacillus_cereus_ATCC_10987_chromosome<>Bacillus_cereus_ATCC14579_chromosome<>Bacillus_thuringiensis_konkukian_chromosome<>Bacillus_cereus_ZK_chromosome<>Bacillus_thuringiensis_Al_Hakam_chromosome<>Bacillus_cereus_cytotoxis_NVH_391-98_chromosome	NC_000964_Purine4(-)_-_(hom)|NC_002745_Purine(+)_+_(hom)|NC_000964_Purine3(+)_+_(hom)|NC_003210_Purine2(-)_-_(hom)	1	Purine_NC_007530(para)	Purine2_NC_000964|UD(5'(0-0)|3'(0-0)),Purine1_NC_003210|3'(0),Purine2_NC_003210|3'(0),Purine4_NC_000964|3'(0),Purine_NC_002745|3'(0)	5	RS	-B.subtilis_sigA_1(9.26|-193)B.subtilis_sigA_2(10.32|-193)
Bacillus_anthracis_Ames_0581	|	ykoK_NC_007530	|	GBAA1603		hypothetical protein	*	>>>	146	|	1510486	1510765	>>>	279	|	266	>>>	GBAA1605	cation transporter, putative	*	ykoK	474	9.8e-16	T		18	RNA	Bacillus_subtilis_chromosome<>Bacillus_halodurans_chromosome<>Clostridium_acetobutylicum_chromosome<>Listeria_innocua_chromosome<>Bacillus_cereus_ATCC_10987_chromosome<>Bacillus_cereus_ATCC14579_chromosome<>Bacillus_thuringiensis_konkukian_chromosome<>Bacillus_licheniformis_ATCC_14580_chromosome<>Bacillus_cereus_ZK_chromosome<>Bacillus_licheniformis_DSM_13_chromosome<>Bacillus_clausii_KSM-K16_chr…	NC_000964_ykoK(+)_+_(hom)|NC_003210_ykoK(-)_-_(hom)|NC_002505_ykoK(+)_+_(hom)	0	Candidate_127_NC_007530(anti)	-	-	-	-
Bacillus_anthracis_Ames_0581	|	T-box_NC_007530	|	GBAA1965		hypothetical protein	*	>>>	220	|	1850019	1850282	>>>	263	|	479	>>>	GBAA1968	homoserine dehydrogenase	*	T-box	536	1.8e-18	T		11	RNA	Bacillus_subtilis_chromosome<>Bacillus_halodurans_chromosome<>Bacillus_cereus_ATCC_10987_chromosome<>Bacillus_cereus_ATCC14579_chromosome<>Bacillus_thuringiensis_konkukian_chromosome<>Bacillus_cereus_ZK_chromosome<>Geobacillus_kaustophilus_HTA426_chromosome<>Bacillus_clausii_KSM-K16_chromosome<>Bacillus_thuringiensis_Al_Hakam_chromosome<>Geobacillus_thermodenitrificans_NG80-2_chromosome<>Bacillus…	NC_000964_T1box15(-)_-_(hom)|NC_000964_T1box16(-)_-_(hom)|NC_000964_T1box17(-)_-_(hom)|NC_000964_T1box12(-)_-_(hom)|NC_003210_T1box6(-)_-_(hom)	3	T-box_NC_007530(tandem),T-box_NC_007530(para),T-box_NC_007530(para)	T1box3_NC_000964|UD(5'(1-1)|3'(0-0)),T1box12_NC_003210|UD(5'(1-1)|3'(0-0)),T1box4_NC_002745|UD(5'(0-0)|3'(0-0)),T1box7_NC_003210|UD(5'(1-1)|3'(0-0)),T1box5_NC_000964|UD(5'(0-0)|3'(0-0)),T1box8_NC_000964|UD(5'(1-1)|3'(0-0)),T1box10_NC_000964|UD(5'(0-0)|3'(1-1)),Lysine2_NC_002745|UD(5'(1-1)|3'(1-1)),T1box12_NC_000964|UD(5'(0-0)|3'(0-0)),T1box6_NC_003210|UD(5'(1-0)|3'(0-0)),T1box8_NC_002745|UD(5'(1-…	-	-	-B.subtilis_sigA_2(10.06|-274)
Bacillus_anthracis_Ames_0581	|	T-box_NC_007530	|	GBAA2215		hypothetical protein	*	>>>	102	|	2069111	2069412	>>>	301	|	90	>>>	GBAA2216	sodium-dependent transporter, putative	*	T-box	490	1.1e-16	T		8	RNA	Bacillus_cereus_ATCC_10987_chromosome<>Bacillus_cereus_ATCC14579_chromosome<>Bacillus_thuringiensis_konkukian_chromosome<>Bacillus_licheniformis_ATCC_14580_chromosome<>Bacillus_cereus_ZK_chromosome<>Bacillus_licheniformis_DSM_13_chromosome<>Bacillus_thuringiensis_Al_Hakam_chromosome<>Bacillus_cereus_cytotoxis_NVH_391-98_chromosome	NC_003210_T1box14(-)_-_(hom)|NC_000964_T1box11(-)_-_(hom)|NC_003210_T1box11(-)_-_(hom)|NC_002745_T1box2(-)_-_(hom)|NC_000964_T1box13(-)_-_(hom)|NC_003210_T1box13(+)_+_(hom)	2	Candidate_582_NC_007530(para),T-box_NC_007530(para)	T1box3_NC_000964|UD(5'(1-1)|3'(0-0)),T1box12_NC_003210|UD(5'(1-1)|3'(0-0)),T1box4_NC_002745|UD(5'(0-0)|3'(0-0)),T1box7_NC_003210|UD(5'(1-1)|3'(0-0)),T1box5_NC_000964|UD(5'(0-0)|3'(0-0)),T1box8_NC_000964|UD(5'(1-1)|3'(0-0)),T1box10_NC_000964|UD(5'(0-0)|3'(1-1)),Lysine2_NC_002745|UD(5'(1-1)|3'(1-1)),T1box12_NC_000964|UD(5'(0-0)|3'(0-0)),T1box6_NC_003210|UD(5'(1-0)|3'(0-0)),T1box8_NC_002745|UD(5'(1-…	-	RS	-B.subtilis_sigG_2(8.23|-377)B.subtilis_sigA_2(10.77|-310)
Bacillus_anthracis_Ames_0581	|	Glycine_NC_007530	|	GBAA2381		sodium/alanine symporter family protein	*	<<<	25	|	2221538	2221956	<<<	418	|	0	<<<	GBAA2383	hypothetical protein	*	Glycine	2211	2.8e-94	T		4	RNA	Bacillus_cereus_ATCC14579_chromosome<>Bacillus_thuringiensis_konkukian_chromosome<>Bacillus_cereus_ZK_chromosome<>Bacillus_thuringiensis_Al_Hakam_chromosome	NC_002505_gcvT1(-)_-_(hom)	0	-	gcvT1_NC_002505|3'(0),gcvT2_NC_002505|3'(0)	5	-	-B.subtilis_sigG_2(8.56|-344)B.subtilis_sigA_2(10.28|-360)
Bacillus_anthracis_Ames_0581	|	TPP_NC_007530	|	GBAA2610		D-alanylalanine synthetase	*	>>>	22	|	2433665	2433879	>>>	214	|	64	>>>	GBAA2611	transcriptional activator tena	*	TPP	486	3.2e-16	T		6	RNA	Bacillus_cereus_ATCC_10987_chromosome<>Bacillus_cereus_ATCC14579_chromosome<>Bacillus_thuringiensis_konkukian_chromosome<>Bacillus_cereus_ZK_chromosome<>Bacillus_thuringiensis_Al_Hakam_chromosome<>Bacillus_cereus_cytotoxis_NVH_391-98_chromosome	NC_000964_THI2(+)_+_(hom)|NC_000964_THI1(+)_+_(hom)|NC_003210_THI1(+)_+_(hom)|NC_000964_THI4(+)_+_(hom)|NC_000913_THI1(-)_-_(hom)	3	TPP_NC_007530(para),TPP_NC_007530(para),TPP_NC_007530(para)	THI2_NC_000964|3'(0),THI1_NC_000964|3'(0),THI1_NC_002505|3'(0),THI2_NC_000913|3'(0),THI_NC_002516|3'(0),THI1_NC_003112|3'(0),THI_NC_005072|3'(0)	5	RS	-B.subtilis_sigK_3(10.07|-177)B.subtilis_sigG_3(9.39|-169)B.subtilis_sigA_1(10.93|-187)
Bacillus_anthracis_Ames_0581	|	T-box_NC_007530	|	GBAA2648		penicillin-binding protein	*	>>>	187	|	2469825	2470134	>>>	309	|	37	>>>	GBAA2649	permease, putative	*	T-box	774	1.9e-29	T		6	RNA	Bacillus_cereus_ATCC_10987_chromosome<>Bacillus_cereus_ATCC14579_chromosome<>Bacillus_thuringiensis_konkukian_chromosome<>Bacillus_cereus_ZK_chromosome<>Bacillus_clausii_KSM-K16_chromosome<>Bacillus_thuringiensis_Al_Hakam_chromosome	NC_000964_T1box9(-)_-_(hom)|NC_003210_T1box5(-)_-_(hom)|NC_003210_T1box12(+)_+_(hom)|NC_003210_T1box8(-)_-_(hom)|NC_003210_T1box13(+)_+_(hom)|NC_000964_T1box7(-)_-_(hom)	2	T-box_NC_007530(para),Candidate_582_NC_007530(para)	T1box3_NC_000964|UD(5'(1-1)|3'(0-0)),T1box12_NC_003210|UD(5'(1-1)|3'(0-0)),T1box4_NC_002745|UD(5'(0-0)|3'(0-0)),T1box7_NC_003210|UD(5'(1-1)|3'(0-0)),T1box5_NC_000964|UD(5'(0-0)|3'(0-0)),T1box8_NC_000964|UD(5'(1-1)|3'(0-0)),T1box10_NC_000964|UD(5'(0-0)|3'(1-1)),Lysine2_NC_002745|UD(5'(1-1)|3'(1-1)),T1box12_NC_000964|UD(5'(0-0)|3'(0-0)),T1box6_NC_003210|UD(5'(1-0)|3'(0-0)),T1box8_NC_002745|UD(5'(1-…	5	RS	-
Bacillus_anthracis_Ames_0581	|	SAM_NC_007530	|	GBAA3206		peptidase, m20/m25/m40 family	*	<<<	26	|	2953193	2953431	<<<	238	|	0	<<<	GBAA3207	hypothetical protein	*	SAM	1012	6.6e-40	B		6	RNA	Bacillus_cereus_ATCC_10987_chromosome<>Bacillus_cereus_ATCC14579_chromosome<>Bacillus_thuringiensis_konkukian_chromosome<>Bacillus_cereus_ZK_chromosome<>Bacillus_thuringiensis_Al_Hakam_chromosome<>Bacillus_cereus_cytotoxis_NVH_391-98_chromosome	NC_000964_S_box7(-)_-_(hom)|NC_003210_S_box3(-)_-_(hom)|NC_000964_S_box2(+)_+_(hom)|NC_000964_S_box10(+)_+_(hom)|NC_000964_S_box9(-)_-_(hom)|NC_003210_S_box6(-)_-_(hom)|NC_002745_S_box3(-)_-_(hom)|NC_000964_S_box11(+)_+_(hom)|NC_002745_S_box4(-)_-_(hom)|NC_000964_S_box1(-)_-_(hom)|NC_000964_S_box8(-)_-_(hom)|NC_003210_S_box2(-)_-_(hom)	10	Candidate_25_NC_007530(anti),SAM_NC_007530(para),SAM_NC_007530(para),Candidate_97_NC_007530(para),SAM_NC_007530(para),SAM_NC_007530(para),SAM_NC_007530(para),SAM_NC_007530(para),SAM_NC_007530(para),Candidate_110_NC_007530(para),SAM_NC_007530(para)	S_box2_NC_003210|UD(5'(1-1)|3'(0-0)),S_box4_NC_000964|UD(5'(1-1)|3'(0-0)),S_box5_NC_000964|UD(5'(1-1)|3'(0-1)),S_box9_NC_000964|UD(5'(1-1)|3'(0-0)),S_box4_NC_002745|3'(0),S_box1_NC_000964|3'(0),S_box2_NC_000964|3'(0),T1box2_NC_002745|3'(0),S_box3_NC_003210|3'(0),S_box7_NC_003210|3'(0),S_box2_NC_002745|3'(0)	5	RS	-B.subtilis_sigA_2(10.05|-193)
Bacillus_anthracis_Ames_0581	|	T-box_NC_007530	|	GBAA4034		isoleucyl-tRNA synthetase	*	<<<	48	|	3716226	3716524	<<<	298	|	0	<<<	GBAA4035	cell-division initiation protein diviva	*	T-box	1453	6.3e-60	T		6	RNA	Bacillus_cereus_ATCC_10987_chromosome<>Bacillus_cereus_ATCC14579_chromosome<>Bacillus_thuringiensis_konkukian_chromosome<>Bacillus_cereus_ZK_chromosome<>Bacillus_thuringiensis_Al_Hakam_chromosome<>Bacillus_cereus_cytotoxis_NVH_391-98_chromosome	NC_000964_T1box5(+)_+_(hom)|NC_003210_T1box1(+)_+_(hom)|NC_003210_T1box4(-)_-_(hom)|NC_000964_T1box14(-)_-_(hom)|NC_000964_T1box10(-)_-_(hom)|NC_002745_T1box7(-)_-_(hom)|NC_000964_T1box7(-)_-_(hom)|NC_000964_T1box18(+)_+_(hom)|NC_000964_T1box13(-)_-_(hom)|NC_002745_T1box8(-)_-_(hom)|NC_003210_T1box13(+)_+_(hom)	9	T-box_NC_007530(para),T-box_NC_007530(para),T-box_NC_007530(para),T-box_NC_007530(para),T-box_NC_007530(para),T-box_NC_007530(para),T-box_NC_007530(para),T-box_NC_007530(para),Candidate_582_NC_007530(para)	T1box3_NC_000964|UD(5'(1-1)|3'(0-0)),T1box12_NC_003210|UD(5'(1-1)|3'(0-0)),T1box4_NC_002745|UD(5'(0-0)|3'(0-0)),T1box7_NC_003210|UD(5'(1-1)|3'(0-0)),T1box5_NC_000964|UD(5'(0-0)|3'(0-0)),T1box8_NC_000964|UD(5'(1-1)|3'(0-0)),T1box10_NC_000964|UD(5'(0-0)|3'(1-1)),Lysine2_NC_002745|UD(5'(1-1)|3'(1-1)),T1box12_NC_000964|UD(5'(0-0)|3'(0-0)),T1box6_NC_003210|UD(5'(1-0)|3'(0-0)),T1box8_NC_002745|UD(5'(1-…	-	RS	-B.subtilis_sigA_2(10.84|-268)
Bacillus_anthracis_Ames_0581	|	SAM_NC_007530	|	GBAA4252		5-methylthioribose kinase, putative	*	<<<	42	|	3890676	3890779	<<<	103	|	158	<<<	GBAA4253	hydrolase, carbon-nitrogen family	*	SAM	275	6.3e-19	B		7	RNA	Bacillus_subtilis_chromosome<>Bacillus_cereus_ATCC14579_chromosome<>Bacillus_thuringiensis_konkukian_chromosome<>Bacillus_cereus_ZK_chromosome<>Bacillus_thuringiensis_Al_Hakam_chromosome<>Geobacillus_thermodenitrificans_NG80-2_chromosome<>Bacillus_cereus_cytotoxis_NVH_391-98_chromosome	NC_000964_S_box4(-)_-_(hom)|NC_000964_S_box8(-)_-_(hom)|NC_003210_S_box2(-)_-_(hom)|NC_003210_S_box3(-)_-_(hom)	2	Candidate_62_NC_007530(para),SAM_NC_007530(para)	S_box2_NC_003210|UD(5'(1-1)|3'(0-0)),S_box4_NC_000964|UD(5'(1-1)|3'(0-0)),S_box5_NC_000964|UD(5'(1-1)|3'(0-1)),S_box9_NC_000964|UD(5'(1-1)|3'(0-0)),S_box4_NC_002745|3'(0),S_box1_NC_000964|3'(0),S_box2_NC_000964|3'(0),T1box2_NC_002745|3'(0),S_box3_NC_003210|3'(0),S_box7_NC_003210|3'(0),S_box2_NC_002745|3'(0)	-	RS	-B.subtilis_sigG_1(8.05|-195)B.subtilis_sigA_3(10.32|-228)
Bacillus_anthracis_Ames_0581	|	SAM_NC_007530	|	GBAA4254		hypothetical protein	*	>>>	16	|	3893010	3893206	>>>	196	|	23	>>>	GBAA4255	ribulose bisphosphate carboxylase, putative	*	SAM	943	1.1e-36	T		6	RNA	Bacillus_cereus_ATCC_10987_chromosome<>Bacillus_cereus_ATCC14579_chromosome<>Bacillus_thuringiensis_konkukian_chromosome<>Bacillus_cereus_ZK_chromosome<>Bacillus_thuringiensis_Al_Hakam_chromosome<>Bacillus_cereus_cytotoxis_NVH_391-98_chromosome	NC_000964_S_box5(+)_+_(hom)|NC_000964_S_box11(+)_+_(hom)|NC_000964_S_box9(-)_-_(hom)|NC_000964_S_box10(+)_+_(hom)|NC_003210_S_box6(-)_-_(hom)|NC_003210_S_box3(-)_-_(hom)|NC_002745_S_box2(+)_+_(hom)|NC_003210_S_box1(+)_+_(hom)|NC_000964_S_box7(-)_-_(hom)|NC_000964_S_box1(-)_-_(hom)	8	SAM_NC_007530(para),SAM_NC_007530(para),SAM_NC_007530(para),Candidate_97_NC_007530(para),SAM_NC_007530(para),SAM_NC_007530(para),SAM_NC_007530(para),SAM_NC_007530(para)	S_box2_NC_003210|UD(5'(1-1)|3'(0-0)),S_box4_NC_000964|UD(5'(1-1)|3'(0-0)),S_box5_NC_000964|UD(5'(1-1)|3'(0-1)),S_box9_NC_000964|UD(5'(1-1)|3'(0-0)),S_box4_NC_002745|3'(0),S_box1_NC_000964|3'(0),S_box2_NC_000964|3'(0),T1box2_NC_002745|3'(0),S_box3_NC_003210|3'(0),S_box7_NC_003210|3'(0),S_box2_NC_002745|3'(0)	5	RS	-
Bacillus_anthracis_Ames_0581	|	T-box_NC_007530	|	GBAA4633		histidyl-tRNA synthetase	*	<<<	41	|	4210808	4211071	<<<	263	|	49	<<<	GBAA4634	hypothetical protein	*	T-box	498	7.7e-17	T		9	RNA	Bacillus_subtilis_chromosome<>Bacillus_halodurans_chromosome<>Bacillus_cereus_ATCC_10987_chromosome<>Bacillus_cereus_ATCC14579_chromosome<>Bacillus_thuringiensis_konkukian_chromosome<>Bacillus_cereus_ZK_chromosome<>Geobacillus_kaustophilus_HTA426_chromosome<>Geobacillus_thermodenitrificans_NG80-2_chromosome<>Bacillus_cereus_cytotoxis_NVH_391-98_chromosome	NC_000964_T1box9(-)_-_(hom)|NC_003210_T1box4(-)_-_(hom)|NC_000964_T1box13(-)_-_(hom)|NC_003210_T1box12(+)_+_(hom)|NC_000964_T1box7(-)_-_(hom)|NC_000964_T1box14(-)_-_(hom)	3	T-box_NC_007530(para),T-box_NC_007530(para),T-box_NC_007530(para)	T1box3_NC_000964|UD(5'(1-1)|3'(0-0)),T1box12_NC_003210|UD(5'(1-1)|3'(0-0)),T1box4_NC_002745|UD(5'(0-0)|3'(0-0)),T1box7_NC_003210|UD(5'(1-1)|3'(0-0)),T1box5_NC_000964|UD(5'(0-0)|3'(0-0)),T1box8_NC_000964|UD(5'(1-1)|3'(0-0)),T1box10_NC_000964|UD(5'(0-0)|3'(1-1)),Lysine2_NC_002745|UD(5'(1-1)|3'(1-1)),T1box12_NC_000964|UD(5'(0-0)|3'(0-0)),T1box6_NC_003210|UD(5'(1-0)|3'(0-0)),T1box8_NC_002745|UD(5'(1-…	-	RS	-B.subtilis_sigA_2(10.32|-279)
Bacillus_anthracis_Ames_0581	|	T-box_NC_007530	|	GBAA4690		valyl-tRNA synthetase	*	<<<	19	|	4266300	4266580	<<<	280	|	95	<<<	GBAA4691	hypothetical protein	*	T-box	474	7.5e-16	B		7	RNA	Bacillus_cereus_ATCC_10987_chromosome<>Bacillus_cereus_ATCC14579_chromosome<>Bacillus_thuringiensis_konkukian_chromosome<>Bacillus_cereus_ZK_chromosome<>Geobacillus_kaustophilus_HTA426_chromosome<>Bacillus_thuringiensis_Al_Hakam_chromosome<>Bacillus_cereus_cytotoxis_NVH_391-98_chromosome	NC_000964_T1box13(-)_-_(hom)|NC_003210_T1box5(-)_-_(hom)|NC_003210_T1box1(+)_+_(hom)|NC_000964_T1box5(+)_+_(hom)|NC_002745_T1box4(+)_+_(hom)|NC_002745_T1box7(-)_-_(hom)|NC_000964_T1box2(+)_+_(hom)|NC_000964_T1box10(-)_-_(hom)|NC_002745_T1box1(+)_+_(hom)|NC_002745_T1box2(-)_-_(hom)	7	T-box_NC_007530(para),T-box_NC_007530(para),T-box_NC_007530(para),T-box_NC_007530(para),T-box_NC_007530(para),T-box_NC_007530(para),Candidate_582_NC_007530(para)	T1box3_NC_000964|UD(5'(1-1)|3'(0-0)),T1box12_NC_003210|UD(5'(1-1)|3'(0-0)),T1box4_NC_002745|UD(5'(0-0)|3'(0-0)),T1box7_NC_003210|UD(5'(1-1)|3'(0-0)),T1box5_NC_000964|UD(5'(0-0)|3'(0-0)),T1box8_NC_000964|UD(5'(1-1)|3'(0-0)),T1box10_NC_000964|UD(5'(0-0)|3'(1-1)),Lysine2_NC_002745|UD(5'(1-1)|3'(1-1)),T1box12_NC_000964|UD(5'(0-0)|3'(0-0)),T1box6_NC_003210|UD(5'(1-0)|3'(0-0)),T1box8_NC_002745|UD(5'(1-…	5	RS	-
Bacillus_anthracis_Ames_0581	|	T-box_NC_007530	|	GBAA4802		asparaginyl-tRNA synthetase	*	<<<	35	|	4366000	4366300	<<<	300	|	162	<<<	GBAA4803	phenylalanyl-tRNA synthetase beta subunit	*	T-box	563	6.6e-20	T		14	RNA	Bacillus_cereus_ATCC_10987_chromosome<>Clostridium_tetani_E88_chromosome<>Bacillus_cereus_ATCC14579_chromosome<>Bacillus_thuringiensis_konkukian_chromosome<>Bacillus_cereus_ZK_chromosome<>Pediococcus_pentosaceus_ATCC_25745_chromosome<>Bacillus_thuringiensis_Al_Hakam_chromosome<>Clostridium_botulinum_A_chromosome<>Alkaliphilus_metalliredigens_QYMF_chromosome<>Bacillus_cereus_cytotoxis_NVH_391-98_c…	NC_000964_T1box5(+)_+_(hom)|NC_000964_T1box18(+)_+_(hom)|NC_002745_T1box7(-)_-_(hom)|NC_003210_T1box5(-)_-_(hom)|NC_000964_T1box6(+)_+_(hom)|NC_000964_T1box13(-)_-_(hom)|NC_003210_T1box3(-)_-_(hom)|NC_002745_T1box2(-)_-_(hom)	6	Candidate_68_NC_007530(anti),Candidate_554_NC_007530(para),Candidate_684_NC_007530(para),Candidate_514_NC_007530(para),Candidate_701_NC_007530(para),Candidate_498_NC_007530(para),T-box_NC_007530(para)	T1box3_NC_000964|UD(5'(1-1)|3'(0-0)),T1box12_NC_003210|UD(5'(1-1)|3'(0-0)),T1box4_NC_002745|UD(5'(0-0)|3'(0-0)),T1box7_NC_003210|UD(5'(1-1)|3'(0-0)),T1box5_NC_000964|UD(5'(0-0)|3'(0-0)),T1box8_NC_000964|UD(5'(1-1)|3'(0-0)),T1box10_NC_000964|UD(5'(0-0)|3'(1-1)),Lysine2_NC_002745|UD(5'(1-1)|3'(1-1)),T1box12_NC_000964|UD(5'(0-0)|3'(0-0)),T1box6_NC_003210|UD(5'(1-0)|3'(0-0)),T1box8_NC_002745|UD(5'(1-…	-	RS	-
Bacillus_anthracis_Ames_0581	|	SAM_NC_007530	|	GBAA5222		abc transporter, atp-binding protein	*	<<<	233	|	4739931	4740197	<<<	266	|	31	<<<	GBAA5224	hypothetical protein	*	SAM	418	1.8e-17	T		7	RNA	Bacillus_halodurans_chromosome<>Bacillus_cereus_ATCC_10987_chromosome<>Bacillus_cereus_ATCC14579_chromosome<>Bacillus_thuringiensis_konkukian_chromosome<>Bacillus_thuringiensis_Al_Hakam_chromosome<>Bacillus_cereus_cytotoxis_NVH_391-98_chromosome<>Bacillus_amyloliquefaciens_FZB42_chromosome	NC_000964_S_box9(-)_-_(hom)|NC_000964_S_box11(+)_+_(hom)|NC_003210_S_box2(-)_-_(hom)|NC_002745_S_box2(+)_+_(hom)|NC_000964_S_box6(+)_+_(hom)|NC_000964_S_box2(+)_+_(hom)|NC_000964_S_box10(+)_+_(hom)|NC_002745_S_box3(-)_-_(hom)|NC_003210_S_box3(-)_-_(hom)|NC_000964_S_box5(+)_+_(hom)|NC_003210_S_box1(+)_+_(hom)|NC_002745_S_box4(-)_-_(hom)|NC_000964_S_box7(-)_-_(hom)|NC_000964_S_box3(-)_-_(hom)	7	SAM_NC_007530(para),Candidate_25_NC_007530(para),SAM_NC_007530(para),Candidate_110_NC_007530(para),SAM_NC_007530(para),SAM_NC_007530(para),SAM_NC_007530(para)	S_box2_NC_003210|UD(5'(1-1)|3'(0-0)),S_box4_NC_000964|UD(5'(1-1)|3'(0-0)),S_box5_NC_000964|UD(5'(1-1)|3'(0-1)),S_box9_NC_000964|UD(5'(1-1)|3'(0-0)),S_box4_NC_002745|3'(0),S_box1_NC_000964|3'(0),S_box2_NC_000964|3'(0),T1box2_NC_002745|3'(0),S_box3_NC_003210|3'(0),S_box7_NC_003210|3'(0),S_box2_NC_002745|3'(0)	-	-	-B.subtilis_sigA_2(11.58|-235)
Bacillus_anthracis_Ames_0581	|	tmRNA_NC_007530	|	GBAA5331		dna-binding response regulator	*	<<<	329	|	4834431	4834773	<<<	342	|	216	<<<	GBAA5332	SsrA-binding protein	*	tmRNA	654	3.2e-24	T		9	RNA	Bacillus_subtilis_chromosome<>Oceanobacillus_iheyensis_chromosome<>Bacillus_licheniformis_ATCC_14580_chromosome<>Bacillus_licheniformis_DSM_13_chromosome<>Geobacillus_kaustophilus_HTA426_chromosome<>Staphylococcus_haemolyticus_chromosome<>Syntrophus_aciditrophicus_SB_chromosome<>Lactobacillus_reuteri_F275_chromosome<>Bacillus_amyloliquefaciens_FZB42_chromosome	NC_003210_tmRNA(-)_-_(hom)|NC_000964_tmRNA(-)_-_(hom)|NC_002745_tmRNA(+)_+_(hom)|NC_002516_tmRNA(-)_-_(hom)	0	-	-	-	-	-
Bacillus_anthracis_Ames_0581	|	tmRNA_NC_007530	|	GBAA5331		dna-binding response regulator	*	<<<	386	|	4834488	4834773	<<<	285	|	216	<<<	GBAA5332	SsrA-binding protein	*	tmRNA	654	3.2e-24	B		17	RNA	Bacillus_subtilis_chromosome<>Bacillus_halodurans_chromosome<>Listeria_monocytogenes_4b_F2365_chromosome<>Listeria_monocytogenes_chromosome<>Listeria_innocua_chromosome<>Oceanobacillus_iheyensis_chromosome<>Enterococcus_faecalis_V583_chromosome<>Bacillus_licheniformis_ATCC_14580_chromosome<>Bacillus_licheniformis_DSM_13_chromosome<>Geobacillus_kaustophilus_HTA426_chromosome<>Bacillus_clausii_KSM-…	NC_003210_tmRNA(-)_-_(hom)|NC_000964_tmRNA(-)_-_(hom)|NC_002745_tmRNA(+)_+_(hom)|NC_002516_tmRNA(-)_-_(hom)	0	-	-	-	-	-
Bacillus_anthracis_Ames_0581	|	TPP_NC_007530	|	GBAA5463		thiamine biosynthesis protein ThiC	*	<<<	58	|	4953459	4953690	<<<	231	|	9	<<<	GBAA5464	l-lactate permease	*	TPP	1048	8.5e-42	T		6	RNA	Bacillus_cereus_ATCC_10987_chromosome<>Bacillus_cereus_ATCC14579_chromosome<>Bacillus_thuringiensis_konkukian_chromosome<>Bacillus_cereus_ZK_chromosome<>Bacillus_thuringiensis_Al_Hakam_chromosome<>Bacillus_cereus_cytotoxis_NVH_391-98_chromosome	NC_000964_THI1(+)_+_(hom)|NC_000964_THI2(+)_+_(hom)|NC_000964_THI4(+)_+_(hom)|NC_003210_THI1(+)_+_(hom)|NC_000913_THI1(-)_-_(hom)	3	TPP_NC_007530(para),TPP_NC_007530(para),TPP_NC_007530(para)	THI2_NC_000964|3'(0),THI1_NC_000964|3'(0),THI1_NC_002505|3'(0),THI2_NC_000913|3'(0),THI_NC_002516|3'(0),THI1_NC_003112|3'(0),THI_NC_005072|3'(0)	-	RS	-
Bacillus_anthracis_Ames_0581	|	yybP-ykoY_NC_007530	|	GBAA1322		hypothetical protein	*	<<<	110	|	1269145	1269328	<<<	183	|	0	<<<	GBAA1323	potassium uptake protein, trkh family	*	yybP-ykoY	1126	4.3e-45	Z		6	RNA	Bacillus_cereus_ATCC_10987_chromosome<>Bacillus_cereus_ATCC14579_chromosome<>Bacillus_thuringiensis_konkukian_chromosome<>Bacillus_cereus_ZK_chromosome<>Bacillus_thuringiensis_Al_Hakam_chromosome<>Bacillus_cereus_cytotoxis_NVH_391-98_chromosome	NC_003210_yybP1ykoY(+)_+_(hom)	0	-	yybP1ykoY_NC_003210|3'(0),yybP1ykoY1_NC_000964|3'(0),yybP1ykoY_NC_002745|3'(0)	-	-	-B.subtilis_sigA_2(12.5|-159)
Bacillus_anthracis_Ames_0581	|	T-box_NC_007530	|	GBAA1459		branched-chain amino acid transport system ii	*	<<<	38	|	1382634	1382955	<<<	321	|	227	>>>	GBAA1461	hypothetical protein	*	T-box	1375	2e-56	X		2	RNA	Clostridium_tetani_E88_chromosome<>Bacillus_cereus_cytotoxis_NVH_391-98_chromosome	NC_003210_T1box4(-)_-_(hom)|NC_000964_T1box1(+)_+_(hom)	4	Candidate_10_NC_007530(anti),Candidate_592_NC_007530(para),T-box_NC_007530(para),T-box_NC_007530(para),T-box_NC_007530(para)	T1box3_NC_000964|UD(5'(1-1)|3'(0-0)),T1box12_NC_003210|UD(5'(1-1)|3'(0-0)),T1box4_NC_002745|UD(5'(0-0)|3'(0-0)),T1box7_NC_003210|UD(5'(1-1)|3'(0-0)),T1box5_NC_000964|UD(5'(0-0)|3'(0-0)),T1box8_NC_000964|UD(5'(1-1)|3'(0-0)),T1box10_NC_000964|UD(5'(0-0)|3'(1-1)),Lysine2_NC_002745|UD(5'(1-1)|3'(1-1)),T1box12_NC_000964|UD(5'(0-0)|3'(0-0)),T1box6_NC_003210|UD(5'(1-0)|3'(0-0)),T1box8_NC_002745|UD(5'(1-…	-	RS	-B.subtilis_sigG_1(8.64|-325)B.subtilis_sigG_3(9.56|-325)
Bacillus_anthracis_Ames_0581	|	RNaseP_bact_b_NC_007530	|	GBAA1583		hypothetical protein	*	>>>	459	|	1489547	1489623	>>>	76	|	122	>>>	GBAA1584	hypothetical protein	*	RNaseP_bact_b	141	3.9e-35	Z		35	RNA	Bacillus_halodurans_chromosome<>Staphylococcus_aureus_COL_chromosome<>Staphylococcus_aureus_aureus_MRSA252_chromosome<>Staphylococcus_aureus_aureus_MSSA476_chromosome<>Staphylococcus_epidermidis_RP62A_chromosome<>Streptococcus_pneumoniae_TIGR4_chromosome<>Streptococcus_pneumoniae_R6_chromosome<>Listeria_monocytogenes_chromosome<>Oceanobacillus_iheyensis_chromosome<>Streptococcus_mutans_chromosome…	NC_000964_RNaseP_bact_b(-)_-_(hom)|NC_003210_RNaseP_bact_b(-)_-_(hom)	0	-	RNaseP_bact_b_NC_000964|UD(5'(0-0)|3'(0-0)),RNaseP_bact_b_NC_003210|UD(5'(0-0)|3'(1-1)),RNaseP_bact_b_NC_002745|UD(5'(0-1)|3'(1-1))	-	-	-
Bacillus_anthracis_Ames_0581	|	T-box_NC_007530	|	GBAA1834		polysaccharide biosynthesis family protein	*	<<<	65	|	1720974	1721374	>>>	400	|	278	>>>	GBAA1835	sodium-dependent transporter	*	T-box	2817	7e-122	X		6	RNA	Bacillus_cereus_ATCC_10987_chromosome<>Bacillus_cereus_ATCC14579_chromosome<>Bacillus_thuringiensis_konkukian_chromosome<>Bacillus_cereus_ZK_chromosome<>Bacillus_thuringiensis_Al_Hakam_chromosome<>Bacillus_cereus_cytotoxis_NVH_391-98_chromosome	NC_000964_T1box1(+)_+_(hom)|NC_003210_T1box1(+)_+_(hom)|NC_000964_T1box5(+)_+_(hom)|NC_000964_T1box13(-)_-_(hom)|NC_003210_T1box14(-)_-_(hom)|NC_002745_T1box7(-)_-_(hom)|NC_002745_T1box8(-)_-_(hom)|NC_000964_T1box7(-)_-_(hom)|NC_003210_T1box7(-)_-_(hom)|NC_000964_T1box18(+)_+_(hom)|NC_000964_T1box9(-)_-_(hom)	10	T-box_NC_007530(para),T-box_NC_007530(para),T-box_NC_007530(para),Candidate_592_NC_007530(para),T-box_NC_007530(para),T-box_NC_007530(para),T-box_NC_007530(para),T-box_NC_007530(para),T-box_NC_007530(para),T-box_NC_007530(para)	T1box3_NC_000964|UD(5'(1-1)|3'(0-0)),T1box12_NC_003210|UD(5'(1-1)|3'(0-0)),T1box4_NC_002745|UD(5'(0-0)|3'(0-0)),T1box7_NC_003210|UD(5'(1-1)|3'(0-0)),T1box5_NC_000964|UD(5'(0-0)|3'(0-0)),T1box8_NC_000964|UD(5'(1-1)|3'(0-0)),T1box10_NC_000964|UD(5'(0-0)|3'(1-1)),Lysine2_NC_002745|UD(5'(1-1)|3'(1-1)),T1box12_NC_000964|UD(5'(0-0)|3'(0-0)),T1box6_NC_003210|UD(5'(1-0)|3'(0-0)),T1box8_NC_002745|UD(5'(1-…	-	-	-B.subtilis_sigG_2(8.44|-302)
Bacillus_anthracis_Ames_0581	|	SAM_NC_007530	|	GBAA0175		abc transporter, substrate-binding protein,	*	<<<	31	|	177106	177343	<<<	237	|	10	<<<	GBAA0176	alcohol dehydrogenase, zinc-containing	*	SAM	473	1e-15	Z		8	RNA	Listeria_monocytogenes_4b_F2365_chromosome<>Listeria_monocytogenes_chromosome<>Listeria_innocua_chromosome<>Bacillus_cereus_ATCC_10987_chromosome<>Bacillus_cereus_ATCC14579_chromosome<>Bacillus_cereus_ZK_chromosome<>Listeria_welshimeri_serovar_6b_SLCC5334_chromosome<>Bacillus_thuringiensis_Al_Hakam_chromosome	NC_003210_S_box2(-)_-_(hom)|NC_003210_S_box6(-)_-_(hom)|NC_000964_S_box6(+)_+_(hom)|NC_003210_S_box7(-)_-_(hom)|NC_000964_S_box2(+)_+_(hom)|NC_000964_S_box10(+)_+_(hom)|NC_002745_S_box2(+)_+_(hom)|NC_000964_S_box1(-)_-_(hom)|NC_000964_S_box9(-)_-_(hom)|NC_000964_S_box11(+)_+_(hom)|NC_000964_S_box7(-)_-_(hom)|NC_000964_S_box5(+)_+_(hom)|NC_000964_S_box8(-)_-_(hom)|NC_003210_S_box1(+)_+_(hom)|NC_00…	10	SAM_NC_007530(para),SAM_NC_007530(para),Candidate_110_NC_007530(para),SAM_NC_007530(para),SAM_NC_007530(para),SAM_NC_007530(para),Candidate_25_NC_007530(para),SAM_NC_007530(para),SAM_NC_007530(para),SAM_NC_007530(para)	S_box2_NC_003210|UD(5'(1-1)|3'(0-0)),S_box4_NC_000964|UD(5'(1-1)|3'(0-0)),S_box5_NC_000964|UD(5'(1-1)|3'(0-1)),S_box9_NC_000964|UD(5'(1-1)|3'(0-0)),S_box4_NC_002745|3'(0),S_box1_NC_000964|3'(0),S_box2_NC_000964|3'(0),T1box2_NC_002745|3'(0),S_box3_NC_003210|3'(0),S_box7_NC_003210|3'(0),S_box2_NC_002745|3'(0)	-	RS	-B.subtilis_sigA_2(9.4|-199)
Bacillus_anthracis_Ames_0581	|	T-box_NC_007530	|	GBAA1965		hypothetical protein	*	>>>	544	|	1850343	1850628	>>>	285	|	133	>>>	GBAA1968	homoserine dehydrogenase	*	T-box	484	2.8e-28	Y		3	RNA	Geobacillus_kaustophilus_HTA426_chromosome<>Bacillus_clausii_KSM-K16_chromosome<>Geobacillus_thermodenitrificans_NG80-2_chromosome	NC_000964_T1box15(-)_-_(hom)|NC_000964_T1box16(-)_-_(hom)|NC_000964_T1box17(-)_-_(hom)|NC_000964_T1box12(-)_-_(hom)|NC_003210_T1box6(-)_-_(hom)|NC_003210_T1box2(-)_-_(hom)	1	T-box_NC_007530(tandem)	T1box3_NC_000964|UD(5'(1-1)|3'(0-0)),T1box12_NC_003210|UD(5'(1-1)|3'(0-0)),T1box4_NC_002745|UD(5'(0-0)|3'(0-0)),T1box7_NC_003210|UD(5'(1-1)|3'(0-0)),T1box5_NC_000964|UD(5'(0-0)|3'(0-0)),T1box8_NC_000964|UD(5'(1-1)|3'(0-0)),T1box10_NC_000964|UD(5'(0-0)|3'(1-1)),Lysine2_NC_002745|UD(5'(1-1)|3'(1-1)),T1box12_NC_000964|UD(5'(0-0)|3'(0-0)),T1box6_NC_003210|UD(5'(1-0)|3'(0-0)),T1box8_NC_002745|UD(5'(1-…	-	-	-B.subtilis_sigA_1(11.39|-274)
Bacillus_anthracis_Ames_0581	|	T-box_NC_007530	|	GBAA2174		hypothetical protein	*	>>>	1	|	2024390	2024660	>>>	270	|	28	>>>	GBAA2175	arginyl-tRNA synthetase	*	T-box	1131	2.5e-45	Z		5	RNA	Bacillus_cereus_ATCC14579_chromosome<>Bacillus_thuringiensis_konkukian_chromosome<>Bacillus_cereus_ZK_chromosome<>Bacillus_thuringiensis_Al_Hakam_chromosome<>Bacillus_cereus_cytotoxis_NVH_391-98_chromosome	NC_000964_T1box3(-)_-_(hom)|NC_002745_T1box8(-)_-_(hom)|NC_002745_T1box7(-)_-_(hom)|NC_000964_T1box14(-)_-_(hom)|NC_003210_T1box4(-)_-_(hom)	6	T-box_NC_007530(para),Candidate_592_NC_007530(para),Candidate_10_NC_007530(para),T-box_NC_007530(para),T-box_NC_007530(para),T-box_NC_007530(para)	T1box3_NC_000964|UD(5'(1-1)|3'(0-0)),T1box12_NC_003210|UD(5'(1-1)|3'(0-0)),T1box4_NC_002745|UD(5'(0-0)|3'(0-0)),T1box7_NC_003210|UD(5'(1-1)|3'(0-0)),T1box5_NC_000964|UD(5'(0-0)|3'(0-0)),T1box8_NC_000964|UD(5'(1-1)|3'(0-0)),T1box10_NC_000964|UD(5'(0-0)|3'(1-1)),Lysine2_NC_002745|UD(5'(1-1)|3'(1-1)),T1box12_NC_000964|UD(5'(0-0)|3'(0-0)),T1box6_NC_003210|UD(5'(1-0)|3'(0-0)),T1box8_NC_002745|UD(5'(1-…	5	RS	-B.subtilis_sigG_2(9.52|-228)B.subtilis_sigA_1(10.25|-250)
Bacillus_anthracis_Ames_0581	|	T-box_NC_007530	|	GBAA2180		tpr domain protein	*	>>>	297	|	2032954	2033015	>>>	61	|	33	>>>	GBAA2181	isoleucyl-tRNA synthetase	*	T-box	210	1.3e-22	Z		7	RNA	Bacillus_cereus_ATCC_10987_chromosome<>Clostridium_tetani_E88_chromosome<>Bacillus_cereus_ATCC14579_chromosome<>Bacillus_thuringiensis_konkukian_chromosome<>Bacillus_cereus_ZK_chromosome<>Bacillus_thuringiensis_Al_Hakam_chromosome<>Bacillus_cereus_cytotoxis_NVH_391-98_chromosome	NC_000964_T1box2(+)_+_(hom)	3	Candidate_592_NC_007530(para),T-box_NC_007530(para),T-box_NC_007530(para)	T1box3_NC_000964|UD(5'(1-1)|3'(0-0)),T1box12_NC_003210|UD(5'(1-1)|3'(0-0)),T1box4_NC_002745|UD(5'(0-0)|3'(0-0)),T1box7_NC_003210|UD(5'(1-1)|3'(0-0)),T1box5_NC_000964|UD(5'(0-0)|3'(0-0)),T1box8_NC_000964|UD(5'(1-1)|3'(0-0)),T1box10_NC_000964|UD(5'(0-0)|3'(1-1)),Lysine2_NC_002745|UD(5'(1-1)|3'(1-1)),T1box12_NC_000964|UD(5'(0-0)|3'(0-0)),T1box6_NC_003210|UD(5'(1-0)|3'(0-0)),T1box8_NC_002745|UD(5'(1-…	5	RS	-
Bacillus_anthracis_Ames_0581	|	T-box_NC_007530	|	GBAA2956		chorismate synthase	*	<<<	30	|	2727154	2727244	<<<	90	|	1	<<<	GBAA2957	hypothetical protein	*	T-box	516	1.6e-17	Z		5	RNA	Bacillus_cereus_ATCC_10987_chromosome<>Bacillus_cereus_ATCC14579_chromosome<>Bacillus_thuringiensis_konkukian_chromosome<>Bacillus_cereus_ZK_chromosome<>Bacillus_thuringiensis_Al_Hakam_chromosome	NC_003210_T1box7(-)_-_(hom)|NC_003210_T1box3(-)_-_(hom)|NC_002745_T1box7(-)_-_(hom)|NC_003210_T1box1(+)_+_(hom)|NC_000964_T1box13(-)_-_(hom)|NC_000964_T1box7(-)_-_(hom)|NC_002745_T1box8(-)_-_(hom)|NC_000964_T1box9(-)_-_(hom)|NC_000964_T1box5(+)_+_(hom)	3	T-box_NC_007530(para),T-box_NC_007530(para),Candidate_664_NC_007530(para)	T1box3_NC_000964|UD(5'(1-1)|3'(0-0)),T1box12_NC_003210|UD(5'(1-1)|3'(0-0)),T1box4_NC_002745|UD(5'(0-0)|3'(0-0)),T1box7_NC_003210|UD(5'(1-1)|3'(0-0)),T1box5_NC_000964|UD(5'(0-0)|3'(0-0)),T1box8_NC_000964|UD(5'(1-1)|3'(0-0)),T1box10_NC_000964|UD(5'(0-0)|3'(1-1)),Lysine2_NC_002745|UD(5'(1-1)|3'(1-1)),T1box12_NC_000964|UD(5'(0-0)|3'(0-0)),T1box6_NC_003210|UD(5'(1-0)|3'(0-0)),T1box8_NC_002745|UD(5'(1-…	-	RS	-
Bacillus_anthracis_Ames_0581	|	T-box_NC_007530	|	GBAA2958		3-deoxy-7-phosphoheptulonate synthase	*	<<<	462	|	2728947	2729078	<<<	131	|	237	<<<	GBAA2959	hypothetical protein	*	T-box	185	2.5e-16	Z		7	RNA	Bacillus_halodurans_chromosome<>Bacillus_cereus_ATCC_10987_chromosome<>Bacillus_cereus_ATCC14579_chromosome<>Bacillus_thuringiensis_konkukian_chromosome<>Bacillus_cereus_ZK_chromosome<>Bacillus_thuringiensis_Al_Hakam_chromosome<>Bacillus_cereus_cytotoxis_NVH_391-98_chromosome	NC_000964_T1box13(-)_-_(hom)|NC_003210_T1box1(+)_+_(hom)|NC_002745_T1box8(-)_-_(hom)|NC_003210_T1box11(-)_-_(hom)|NC_002745_T1box7(-)_-_(hom)|NC_002745_T1box4(+)_+_(hom)|NC_003210_T1box3(-)_-_(hom)|NC_000964_T1box18(+)_+_(hom)|NC_003210_T1box7(-)_-_(hom)|NC_000964_T1box9(-)_-_(hom)|NC_000964_T1box7(-)_-_(hom)	7	T-box_NC_007530(para),Candidate_582_NC_007530(para),T-box_NC_007530(para),T-box_NC_007530(para),T-box_NC_007530(para),Candidate_664_NC_007530(para),T-box_NC_007530(para)	T1box3_NC_000964|UD(5'(1-1)|3'(0-0)),T1box12_NC_003210|UD(5'(1-1)|3'(0-0)),T1box4_NC_002745|UD(5'(0-0)|3'(0-0)),T1box7_NC_003210|UD(5'(1-1)|3'(0-0)),T1box5_NC_000964|UD(5'(0-0)|3'(0-0)),T1box8_NC_000964|UD(5'(1-1)|3'(0-0)),T1box10_NC_000964|UD(5'(0-0)|3'(1-1)),Lysine2_NC_002745|UD(5'(1-1)|3'(1-1)),T1box12_NC_000964|UD(5'(0-0)|3'(0-0)),T1box6_NC_003210|UD(5'(1-0)|3'(0-0)),T1box8_NC_002745|UD(5'(1-…	-	-	-
Bacillus_anthracis_Ames_0581	|	Lysine_NC_007530	|	GBAA3075		acetyltransferase, gnat family	*	<<<	79	|	2833530	2834028	>>>	498	|	49	>>>	GBAA3076	lysine-specific permease	*	Lysine	2093	2.4e-89	X		1	COD	Bacillus_cereus_cytotoxis_NVH_391-98_chromosome	NC_003210_Lysine(-)_-_(hom)|NC_000964_Lysine2(-)_-_(hom)	0	-	Lysine_NC_003210|3'(0),Lysine2_NC_002745|3'(0)	5	-	-B.subtilis_sigA_2(9.56|-300)B.subtilis_sigA_3(9.09|-157)
Bacillus_anthracis_Ames_0581	|	TPP_NC_007530	|	GBAA0375		DNA topoisomerase III	*	<<<	187	|	393875	394059	>>>	184	|	36	>>>	GBAA0376	hydroxyethylthiazole kinase	*	TPP	480	2.2e-16	X		6	RNA	Bacillus_cereus_ATCC_10987_chromosome<>Bacillus_thuringiensis_konkukian_chromosome<>Bacillus_cereus_ZK_chromosome<>Bacillus_thuringiensis_Al_Hakam_chromosome<>Geobacillus_thermodenitrificans_NG80-2_chromosome<>Bacillus_cereus_cytotoxis_NVH_391-98_chromosome	NC_000964_THI5(+)_+_(hom)|NC_003210_THI1(+)_+_(hom)|NC_003210_THI2(-)_-_(hom)	1	TPP_NC_007530(para)	THI2_NC_000964|3'(0),THI1_NC_000964|3'(0),THI1_NC_002505|3'(0),THI2_NC_000913|3'(0),THI_NC_002516|3'(0),THI1_NC_003112|3'(0),THI_NC_005072|3'(0)	5	RS	-
Bacillus_anthracis_Ames_0581	|	SAM_NC_007530	|	GBAA4479		bifunctional homocysteine	*	<<<	24	|	4074052	4074497	<<<	445	|	116	>>>	GBAA4480	cystathionine beta-lyase	*	SAM	2326	1.7e-99	X		1	RNA	Bacillus_thuringiensis_Al_Hakam_chromosome	NC_003210_S_box3(-)_-_(hom)|NC_000964_S_box1(-)_-_(hom)|NC_003210_S_box6(-)_-_(hom)|NC_002745_S_box2(+)_+_(hom)|NC_000964_S_box2(+)_+_(hom)|NC_003210_S_box2(-)_-_(hom)|NC_000964_S_box11(+)_+_(hom)|NC_000964_S_box7(-)_-_(hom)|NC_000964_S_box10(+)_+_(hom)|NC_002745_S_box4(-)_-_(hom)|NC_003210_S_box5(-)_-_(hom)|NC_003210_S_box3(-)_-_(hom|rev)|NC_000964_S_box9(-)_-_(hom)|NC_000964_S_box1(-)_-_(hom|re…	9	Candidate_62_NC_007530(anti),Candidate_97_NC_007530(tandem),SAM_NC_007530(anti),SAM_NC_007530(para),Candidate_110_NC_007530(para),SAM_NC_007530(para),Candidate_25_NC_007530(para),SAM_NC_007530(para),SAM_NC_007530(para),SAM_NC_007530(para),SAM_NC_007530(para),SAM_NC_007530(para)	S_box2_NC_003210|UD(5'(1-1)|3'(0-0)),S_box4_NC_000964|UD(5'(1-1)|3'(0-0)),S_box5_NC_000964|UD(5'(1-1)|3'(0-1)),S_box9_NC_000964|UD(5'(1-1)|3'(0-0)),S_box4_NC_002745|3'(0),S_box1_NC_000964|3'(0),S_box2_NC_000964|3'(0),T1box2_NC_002745|3'(0),S_box3_NC_003210|3'(0),S_box7_NC_003210|3'(0),S_box2_NC_002745|3'(0)	5	RS	-
Bacillus_anthracis_Ames_0581	|	T-box_NC_007530	|	GBAA0395		hypothetical protein	*	>>>	1	|	414038	414357	>>>	319	|	26	>>>	GBAA0396	prolyl-tRNA synthetase	*	T-box	1243	1.9e-50	Y		6	RNA	Bacillus_cereus_ATCC_10987_chromosome<>Bacillus_cereus_ATCC14579_chromosome<>Bacillus_thuringiensis_konkukian_chromosome<>Bacillus_cereus_ZK_chromosome<>Bacillus_thuringiensis_Al_Hakam_chromosome<>Bacillus_cereus_cytotoxis_NVH_391-98_chromosome	NC_000964_T1box1(+)_+_(hom)|NC_000964_T1box8(-)_-_(hom)|NC_000964_T1box3(-)_-_(hom)|NC_002745_sprC(-)_-_(hom|rev)	1	T-box_NC_007530(para)	T1box3_NC_000964|UD(5'(1-1)|3'(0-0)),T1box12_NC_003210|UD(5'(1-1)|3'(0-0)),T1box4_NC_002745|UD(5'(0-0)|3'(0-0)),T1box7_NC_003210|UD(5'(1-1)|3'(0-0)),T1box5_NC_000964|UD(5'(0-0)|3'(0-0)),T1box8_NC_000964|UD(5'(1-1)|3'(0-0)),T1box10_NC_000964|UD(5'(0-0)|3'(1-1)),Lysine2_NC_002745|UD(5'(1-1)|3'(1-1)),T1box12_NC_000964|UD(5'(0-0)|3'(0-0)),T1box6_NC_003210|UD(5'(1-0)|3'(0-0)),T1box8_NC_002745|UD(5'(1-…	5	RS	-B.subtilis_sigK_1(9.12|-107)B.subtilis_sigG_2(10.28|-341)B.subtilis_sigG_2(8.78|-297)B.subtilis_sigG_2(8.15|-287)
Bacillus_anthracis_Ames_0581	|	T-box_NC_007530	|	GBAA4584		minor extracellular protease vpr	*	>>>	1	|	4166165	4166485	>>>	320	|	415	>>>	GBAA4586	phenylalanine-4-hydroxylase, putative	*	T-box	193	1.8e-16	Z		6	RNA	Bacillus_cereus_ATCC_10987_chromosome<>Bacillus_cereus_ATCC14579_chromosome<>Bacillus_thuringiensis_konkukian_chromosome<>Bacillus_cereus_ZK_chromosome<>Bacillus_thuringiensis_Al_Hakam_chromosome<>Bacillus_cereus_cytotoxis_NVH_391-98_chromosome	NC_003210_T1box1(+)_+_(hom)|NC_000964_T1box13(-)_-_(hom)|NC_002745_T1box7(-)_-_(hom)|NC_002745_T1box8(-)_-_(hom)|NC_000964_T1box18(+)_+_(hom)|NC_000964_T1box1(+)_+_(hom)|NC_003210_T1box10(-)_-_(hom)|NC_003210_T1box2(-)_-_(hom)|NC_003210_T1box3(-)_-_(hom)	8	Candidate_582_NC_007530(para),T-box_NC_007530(para),T-box_NC_007530(para),T-box_NC_007530(para),T-box_NC_007530(para),Candidate_592_NC_007530(para),T-box_NC_007530(para),Candidate_664_NC_007530(para)	T1box3_NC_000964|UD(5'(1-1)|3'(0-0)),T1box12_NC_003210|UD(5'(1-1)|3'(0-0)),T1box4_NC_002745|UD(5'(0-0)|3'(0-0)),T1box7_NC_003210|UD(5'(1-1)|3'(0-0)),T1box5_NC_000964|UD(5'(0-0)|3'(0-0)),T1box8_NC_000964|UD(5'(1-1)|3'(0-0)),T1box10_NC_000964|UD(5'(0-0)|3'(1-1)),Lysine2_NC_002745|UD(5'(1-1)|3'(1-1)),T1box12_NC_000964|UD(5'(0-0)|3'(0-0)),T1box6_NC_003210|UD(5'(1-0)|3'(0-0)),T1box8_NC_002745|UD(5'(1-…	-	-	-B.subtilis_sigG_2(8.51|-436)B.subtilis_sigA_3(12.5|-281)
Bacillus_anthracis_Ames_0581	|	T-box_NC_007530	|	GBAA4616		alanyl-tRNA synthetase	*	<<<	21	|	4195309	4195596	<<<	287	|	173	>>>	GBAA4617	hypothetical protein	*	T-box	331	1.8e-38	X		6	RNA	Bacillus_cereus_ATCC_10987_chromosome<>Bacillus_cereus_ATCC14579_chromosome<>Bacillus_thuringiensis_konkukian_chromosome<>Bacillus_cereus_ZK_chromosome<>Bacillus_thuringiensis_Al_Hakam_chromosome<>Bacillus_cereus_cytotoxis_NVH_391-98_chromosome	NC_000964_T1box8(-)_-_(hom)|NC_002745_T1box8(-)_-_(hom)|NC_002745_T1box7(-)_-_(hom)|NC_003210_T1box4(-)_-_(hom)|NC_000964_T1box14(-)_-_(hom)|NC_000964_T1box17(-)_-_(hom)|NC_003210_T1box2(-)_-_(hom)|NC_003210_T1box1(+)_+_(hom)|NC_000964_T1box7(-)_-_(hom)|NC_003210_T1box14(-)_-_(hom)	6	T-box_NC_007530(para),Candidate_592_NC_007530(para),T-box_NC_007530(para),T-box_NC_007530(para),T-box_NC_007530(para),T-box_NC_007530(para)	T1box3_NC_000964|UD(5'(1-1)|3'(0-0)),T1box12_NC_003210|UD(5'(1-1)|3'(0-0)),T1box4_NC_002745|UD(5'(0-0)|3'(0-0)),T1box7_NC_003210|UD(5'(1-1)|3'(0-0)),T1box5_NC_000964|UD(5'(0-0)|3'(0-0)),T1box8_NC_000964|UD(5'(1-1)|3'(0-0)),T1box10_NC_000964|UD(5'(0-0)|3'(1-1)),Lysine2_NC_002745|UD(5'(1-1)|3'(1-1)),T1box12_NC_000964|UD(5'(0-0)|3'(0-0)),T1box6_NC_003210|UD(5'(1-0)|3'(0-0)),T1box8_NC_002745|UD(5'(1-…	5	RS	-B.subtilis_sigK_1(10|-360)B.subtilis_sigA_3(9.78|-253)
Bacillus_anthracis_Ames_0581	|	T-box_NC_007530	|	GBAA4804		phenylalanyl-tRNA synthetase alpha subunit	*	<<<	26	|	4369963	4370213	<<<	250	|	43	<<<	GBAA4805	rna methyltransferase, trmh family	*	T-box	525	4.6e-18	Y		10	RNA	Listeria_monocytogenes_4b_F2365_chromosome<>Listeria_monocytogenes_chromosome<>Listeria_innocua_chromosome<>Bacillus_cereus_ATCC_10987_chromosome<>Oceanobacillus_iheyensis_chromosome<>Bacillus_cereus_ATCC14579_chromosome<>Bacillus_thuringiensis_konkukian_chromosome<>Bacillus_cereus_ZK_chromosome<>Geobacillus_kaustophilus_HTA426_chromosome<>Bacillus_cereus_cytotoxis_NVH_391-98_chromosome	NC_003210_T1box1(+)_+_(hom)|NC_003210_T1box5(-)_-_(hom)|NC_000964_T1box9(-)_-_(hom)|NC_000964_T1box5(+)_+_(hom)|NC_002745_T1box7(-)_-_(hom)|NC_002745_T1box8(-)_-_(hom)|NC_000964_T1box6(+)_+_(hom)|NC_003210_T1box14(-)_-_(hom)|NC_000964_T1box17(-)_-_(hom)|NC_000964_T1box13(-)_-_(hom)|NC_002745_T1box4(+)_+_(hom)|NC_000964_T1box1(+)_+_(hom)|NC_000964_T1box2(+)_+_(hom)|NC_002745_SRP_bact(+)_+_(hom)|NC…	7	T-box_NC_007530(para),T-box_NC_007530(para),T-box_NC_007530(para),T-box_NC_007530(para),T-box_NC_007530(para),T-box_NC_007530(para),T-box_NC_007530(para)	T1box3_NC_000964|UD(5'(1-1)|3'(0-0)),T1box12_NC_003210|UD(5'(1-1)|3'(0-0)),T1box4_NC_002745|UD(5'(0-0)|3'(0-0)),T1box7_NC_003210|UD(5'(1-1)|3'(0-0)),T1box5_NC_000964|UD(5'(0-0)|3'(0-0)),T1box8_NC_000964|UD(5'(1-1)|3'(0-0)),T1box10_NC_000964|UD(5'(0-0)|3'(1-1)),Lysine2_NC_002745|UD(5'(1-1)|3'(1-1)),T1box12_NC_000964|UD(5'(0-0)|3'(0-0)),T1box6_NC_003210|UD(5'(1-0)|3'(0-0)),T1box8_NC_002745|UD(5'(1-…	5	RS	-B.subtilis_sigA_2(9.63|-279)
Bacillus_anthracis_Ames_0581	|	T-box_NC_007530	|	GBAA4820		threonyl-tRNA synthetase	*	<<<	28	|	4383625	4383900	<<<	275	|	2	<<<	GBAA4821	hypothetical protein	*	T-box	550	4.1e-19	Z		8	RNA	Bacillus_cereus_ATCC_10987_chromosome<>Bacillus_cereus_ATCC14579_chromosome<>Bacillus_thuringiensis_konkukian_chromosome<>Bacillus_cereus_ZK_chromosome<>Geobacillus_kaustophilus_HTA426_chromosome<>Bacillus_thuringiensis_Al_Hakam_chromosome<>Geobacillus_thermodenitrificans_NG80-2_chromosome<>Bacillus_cereus_cytotoxis_NVH_391-98_chromosome	NC_000964_T1box15(-)_-_(hom)|NC_000964_T1box16(-)_-_(hom)|NC_000964_T1box17(-)_-_(hom)|NC_000964_T1box12(-)_-_(hom)|NC_003210_T1box6(-)_-_(hom)|NC_000964_T1box5(+)_+_(hom)|NC_003210_T1box5(-)_-_(hom)|NC_000964_T1box1(+)_+_(hom)|NC_000964_T1box13(-)_-_(hom)|NC_003210_T1box2(-)_-_(hom)|NC_002745_T1box1(+)_+_(hom)|NC_000964_T1box14(-)_-_(hom)	8	T-box_NC_007530(para),T-box_NC_007530(para),T-box_NC_007530(para),T-box_NC_007530(para),T-box_NC_007530(para),T-box_NC_007530(para),T-box_NC_007530(para),T-box_NC_007530(para)	T1box3_NC_000964|UD(5'(1-1)|3'(0-0)),T1box12_NC_003210|UD(5'(1-1)|3'(0-0)),T1box4_NC_002745|UD(5'(0-0)|3'(0-0)),T1box7_NC_003210|UD(5'(1-1)|3'(0-0)),T1box5_NC_000964|UD(5'(0-0)|3'(0-0)),T1box8_NC_000964|UD(5'(1-1)|3'(0-0)),T1box10_NC_000964|UD(5'(0-0)|3'(1-1)),Lysine2_NC_002745|UD(5'(1-1)|3'(1-1)),T1box12_NC_000964|UD(5'(0-0)|3'(0-0)),T1box6_NC_003210|UD(5'(1-0)|3'(0-0)),T1box8_NC_002745|UD(5'(1-…	5	RS	-B.subtilis_sigG_1(9.85|-400)B.subtilis_sigG_3(9.66|-248)B.subtilis_sigA_2(11.39|-269)
Bacillus_anthracis_Ames_0581	|	T-box_NC_007530	|	GBAA4911		tyrosyl-tRNA synthetase	*	<<<	52	|	4462317	4462618	<<<	301	|	22	<<<	GBAA4912	hypothetical protein	*	T-box	568	2.7e-20	Z		6	RNA	Bacillus_cereus_ATCC_10987_chromosome<>Bacillus_cereus_ATCC14579_chromosome<>Bacillus_thuringiensis_konkukian_chromosome<>Bacillus_cereus_ZK_chromosome<>Bacillus_thuringiensis_Al_Hakam_chromosome<>Bacillus_cereus_cytotoxis_NVH_391-98_chromosome	NC_000964_T1box13(-)_-_(hom)|NC_003210_T1box9(-)_-_(hom)|NC_000964_T1box5(+)_+_(hom)|NC_000964_T1box18(+)_+_(hom)|NC_002745_T1box7(-)_-_(hom)|NC_000964_T1box7(-)_-_(hom)|NC_002745_T1box8(-)_-_(hom)|NC_002745_T1box3(+)_+_(hom)|NC_000964_T1box9(-)_-_(hom)	6	Candidate_582_NC_007530(para),T-box_NC_007530(para),Candidate_592_NC_007530(para),T-box_NC_007530(para),T-box_NC_007530(para),T-box_NC_007530(para)	T1box3_NC_000964|UD(5'(1-1)|3'(0-0)),T1box12_NC_003210|UD(5'(1-1)|3'(0-0)),T1box4_NC_002745|UD(5'(0-0)|3'(0-0)),T1box7_NC_003210|UD(5'(1-1)|3'(0-0)),T1box5_NC_000964|UD(5'(0-0)|3'(0-0)),T1box8_NC_000964|UD(5'(1-1)|3'(0-0)),T1box10_NC_000964|UD(5'(0-0)|3'(1-1)),Lysine2_NC_002745|UD(5'(1-1)|3'(1-1)),T1box12_NC_000964|UD(5'(0-0)|3'(0-0)),T1box6_NC_003210|UD(5'(1-0)|3'(0-0)),T1box8_NC_002745|UD(5'(1-…	-	RS	-
Bacillus_anthracis_Ames_0581	|	T-box_NC_007530	|	GBAA4991		leucyl-tRNA synthetase	*	<<<	46	|	4530935	4530994	<<<	59	|	368	<<<	GBAA4992	permease, putative	*	T-box	232	4.6e-17	Z		10	RNA	Bacillus_cereus_ATCC_10987_chromosome<>Oceanobacillus_iheyensis_chromosome<>Bacillus_cereus_ATCC14579_chromosome<>Bacillus_thuringiensis_konkukian_chromosome<>Bacillus_licheniformis_ATCC_14580_chromosome<>Bacillus_cereus_ZK_chromosome<>Bacillus_licheniformis_DSM_13_chromosome<>Bacillus_thuringiensis_Al_Hakam_chromosome<>Bacillus_cereus_cytotoxis_NVH_391-98_chromosome<>Bacillus_amyloliquefaciens_F…	NC_000964_T1box14(-)_-_(hom)|NC_000964_T1box5(+)_+_(hom)|NC_003210_T1box10(-)_-_(hom)|NC_003210_T1box4(-)_-_(hom)|NC_000964_T1box13(-)_-_(hom)|NC_000964_T1box1(+)_+_(hom)	8	T-box_NC_007530(para),T-box_NC_007530(para),T-box_NC_007530(para),T-box_NC_007530(para),T-box_NC_007530(para),T-box_NC_007530(para),Candidate_10_NC_007530(para),T-box_NC_007530(para)	T1box3_NC_000964|UD(5'(1-1)|3'(0-0)),T1box12_NC_003210|UD(5'(1-1)|3'(0-0)),T1box4_NC_002745|UD(5'(0-0)|3'(0-0)),T1box7_NC_003210|UD(5'(1-1)|3'(0-0)),T1box5_NC_000964|UD(5'(0-0)|3'(0-0)),T1box8_NC_000964|UD(5'(1-1)|3'(0-0)),T1box10_NC_000964|UD(5'(0-0)|3'(1-1)),Lysine2_NC_002745|UD(5'(1-1)|3'(1-1)),T1box12_NC_000964|UD(5'(0-0)|3'(0-0)),T1box6_NC_003210|UD(5'(1-0)|3'(0-0)),T1box8_NC_002745|UD(5'(1-…	-	RS	-
Bacillus_anthracis_Ames_0581	|	T-box_NC_007530	|	GBAA5261		amino acid permease family protein	*	<<<	46	|	4768975	4769246	<<<	271	|	277	<<<	GBAA5262	hypothetical protein	*	T-box	233	1.8e-23	Y		6	RNA	Bacillus_halodurans_chromosome<>Bacillus_cereus_ATCC_10987_chromosome<>Bacillus_cereus_ZK_chromosome<>Geobacillus_kaustophilus_HTA426_chromosome<>Geobacillus_thermodenitrificans_NG80-2_chromosome<>Bacillus_cereus_cytotoxis_NVH_391-98_chromosome	NC_000964_T1box12(-)_-_(hom)|NC_003210_T1box6(-)_-_(hom)|NC_000964_T1box15(-)_-_(hom)|NC_000964_T1box16(-)_-_(hom)|NC_000964_T1box17(-)_-_(hom)|NC_002745_T1box7(-)_-_(hom)|NC_000964_T1box1(+)_+_(hom)|NC_002745_T1box1(+)_+_(hom)|NC_000964_T1box5(+)_+_(hom)	5	Candidate_518_NC_007530(tandem),T-box_NC_007530(para),T-box_NC_007530(para),T-box_NC_007530(para),T-box_NC_007530(para)	T1box3_NC_000964|UD(5'(1-1)|3'(0-0)),T1box12_NC_003210|UD(5'(1-1)|3'(0-0)),T1box4_NC_002745|UD(5'(0-0)|3'(0-0)),T1box7_NC_003210|UD(5'(1-1)|3'(0-0)),T1box5_NC_000964|UD(5'(0-0)|3'(0-0)),T1box8_NC_000964|UD(5'(1-1)|3'(0-0)),T1box10_NC_000964|UD(5'(0-0)|3'(1-1)),Lysine2_NC_002745|UD(5'(1-1)|3'(1-1)),T1box12_NC_000964|UD(5'(0-0)|3'(0-0)),T1box6_NC_003210|UD(5'(1-0)|3'(0-0)),T1box8_NC_002745|UD(5'(1-…	-	RS	-B.subtilis_sigG_2(8.18|-312)B.subtilis_sigA_1(11.39|-282)
Bacillus_anthracis_Ames_0581	|	yybP-ykoY_NC_007530	|	GBAA0808		hypothetical protein	*	<<<	102	|	823958	824184	>>>	226	|	23	>>>	GBAA0809	hypothetical protein	*	yybP-ykoY	483	3.4e-16	X		7	RNA	Bacillus_halodurans_chromosome<>Bacillus_cereus_ATCC_10987_chromosome<>Bacillus_cereus_ATCC14579_chromosome<>Bacillus_thuringiensis_konkukian_chromosome<>Bacillus_cereus_ZK_chromosome<>Bacillus_thuringiensis_Al_Hakam_chromosome<>Geobacillus_thermodenitrificans_NG80-2_chromosome	NC_000964_yybP1ykoY2(-)_-_(hom)|NC_003210_yybP1ykoY(+)_+_(hom)	0	-	yybP1ykoY_NC_003210|3'(0),yybP1ykoY1_NC_000964|3'(0),yybP1ykoY_NC_002745|3'(0)	5	-	-
Bacillus_anthracis_str_Sterne	|	Candidate_9_NC_005945	|	BAS0920		hypothetical protein	*	<<<	1	|	982739	982966	>>>	227	|	2	<<<	BAS0921	lipoprotein, putative	*	candidate	1146	1.5e-46	R		3	RNA	Bacillus_thuringiensis_konkukian_chromosome<>Bacillus_cereus_ZK_chromosome<>Bacillus_thuringiensis_Al_Hakam_chromosome	NC_002745_T1box7(-)_-_(hom|rev)	0	-	-	-	-	-
Bacillus_anthracis_str_Sterne	|	Candidate_23_NC_005945	|	BAS2444		hypothetical protein	*	>>>	60	|	2442632	2442813	>>>	181	|	55	<<<	BAS2445	hypothetical protein	*	candidate	548	6.7e-19	R		5	RNA	Bacillus_cereus_ATCC_10987_chromosome<>Bacillus_cereus_ATCC14579_chromosome<>Bacillus_thuringiensis_konkukian_chromosome<>Bacillus_cereus_ZK_chromosome<>Bacillus_thuringiensis_Al_Hakam_chromosome	NC_002505_B2(-)_-_(hom)	2	Candidate_393_NC_005945(anti),Candidate_232_NC_005945(para),Candidate_820_NC_005945(para)	-	-	-	-B.subtilis_sigK_2(12.35|-85)
Bacillus_anthracis_str_Sterne	|	Candidate_107_NC_005945	|	BAS4112		rhodanese-like domain protein	*	>>>	12	|	4040497	4040715	<<<	218	|	18	>>>	BAS4113	sugar-binding transcriptional regulator, LacI	*	candidate	583	1.4e-20	R		6	RNA	Bacillus_cereus_ATCC_10987_chromosome<>Bacillus_cereus_ATCC14579_chromosome<>Bacillus_thuringiensis_konkukian_chromosome<>Bacillus_cereus_ZK_chromosome<>Bacillus_thuringiensis_Al_Hakam_chromosome<>Bacillus_cereus_cytotoxis_NVH_391-98_chromosome	NC_005072_yfr4(+)_+_(hom)	0	-	-	-	-	-
Bacillus_anthracis_str_Sterne	|	Candidate_124_NC_005945	|	BAS2303		hypothetical protein	*	<<<	242	|	2304889	2305138	<<<	249	|	277	>>>	BAS2304	transcriptional regulator, TetR family	*	candidate	647	5.9e-24	R		1	RNA	Bacillus_cereus_ATCC_10987_chromosome	NC_000913_IS063_tke8_micC(+)_+_(hom|rev)	4	Candidate_353_NC_005945(para),Candidate_34_NC_005945(para),Candidate_717_NC_005945(para),Candidate_718_NC_005945(para)	-	-	-	-B.subtilis_sigK_1(11.82|-68)B.subtilis_sigK_1(11.46|-182)B.subtilis_sigK_3(9.45|-68)B.subtilis_sigK_3(9.69|-182)
Bacillus_anthracis_str_Sterne	|	Candidate_131_NC_005945	|	BAS1908		hypothetical protein	*	>>>	186	|	1928831	1928980	<<<	149	|	0	>>>	BAS1910	lipoprotein, putative	*	candidate	756	4.3e-28	R		3	RNA	Bacillus_thuringiensis_konkukian_chromosome<>Bacillus_cereus_ZK_chromosome<>Bacillus_thuringiensis_Al_Hakam_chromosome	NC_002745_T1box7(-)_-_(hom|rev)	0	-	-	-	-	-
Bacillus_anthracis_str_Sterne	|	Candidate_136_NC_005945	|	BAS1487		hypothetical protein	*	>>>	1	|	1510292	1510680	<<<	388	|	302	>>>	BAS1488	cation transporter, putative	*	candidate	539	6.5e-19	R		1	RNA	Clostridium_beijerinckii_NCIMB_8052_chromosome	NC_000964_ykoK(+)_+_(hom|rev)|NC_003210_ykoK(-)_-_(hom|rev)|NC_002505_ykoK(+)_+_(hom|rev)	0	ykoK_NC_005945(anti)	-	-	-	-
Bacillus_anthracis_str_Sterne	|	Candidate_153_NC_005945	|	BAS0791		acetyltransferase	*	>>>	15	|	841163	841497	<<<	334	|	8	>>>	BAS0792	sugE protein, putative	*	candidate	707	3.2e-26	R		4	RNA	Bacillus_cereus_ATCC14579_chromosome<>Bacillus_thuringiensis_konkukian_chromosome<>Bacillus_cereus_ZK_chromosome<>Bacillus_thuringiensis_Al_Hakam_chromosome	NC_000913_C0067(+)_+_(hom)	2	Candidate_686_NC_005945(para),Candidate_54_NC_005945(para)	-	-	-	-B.subtilis_sigG_2(9.37|-213)
Bacillus_anthracis_str_Sterne	|	Candidate_183_NC_005945	|	BAS0160		D-fructose-6-phosphate amidotransferase	*	>>>	17	|	159695	159871	>>>	176	|	169	>>>	BAS0161	hypothetical protein	*	candidate	1630	3.4e-68	T		2	RNA	Bacillus_thuringiensis_konkukian_chromosome<>Bacillus_cereus_ZK_chromosome	NC_002745_RNAIII(-)_-_(hom|rev)	1	Candidate_432_NC_005945(para)	-	-	-	-B.subtilis_sigG_1(8.22|-263)
Bacillus_anthracis_str_Sterne	|	Candidate_253_NC_005945	|	BAS0895		hypothetical protein	*	>>>	64	|	958397	958507	<<<	110	|	179	<<<	BAS0896	mxaA domain protein	*	candidate	483	7.9e-16	T		3	RNA	Bacillus_cereus_ATCC14579_chromosome<>Bacillus_cereus_ZK_chromosome<>Bacillus_thuringiensis_Al_Hakam_chromosome	NC_002745_sprG(-)_-_(hom)|NC_002745_sprF(+)_+_(hom|rev)	3	Candidate_257_NC_005945(para),Candidate_833_NC_005945(para),Candidate_631_NC_005945(para)	-	-	-	-
Bacillus_anthracis_str_Sterne	|	Candidate_271_NC_005945	|	BAS1076		catalase	*	>>>	3	|	1130521	1130753	<<<	232	|	38	<<<	BAS1078	ammonium transporter	*	candidate	601	8.4e-22	T		5	RNA	Bacillus_cereus_ATCC_10987_chromosome<>Bacillus_cereus_ATCC14579_chromosome<>Bacillus_thuringiensis_konkukian_chromosome<>Bacillus_cereus_ZK_chromosome<>Bacillus_thuringiensis_Al_Hakam_chromosome	NC_003210_rliB(+)_+_(hom)|NC_002745_T1box9(-)_-_(hom|rev)	25	Candidate_272_NC_005945(anti),Candidate_585_NC_005945(para),Candidate_598_NC_005945(para),Candidate_803_NC_005945(para),Candidate_713_NC_005945(para),Candidate_619_NC_005945(para),Candidate_469_NC_005945(para),Candidate_775_NC_005945(para),Candidate_550_NC_005945(para),Candidate_551_NC_005945(para),Candidate_241_NC_005945(para),Candidate_242_NC_005945(para),Candidate_584_NC_005945(para),Candidate…	-	-	-	-B.subtilis_sigG_2(8.46|-264)
Bacillus_anthracis_str_Sterne	|	Candidate_272_NC_005945	|	BAS1076		catalase	*	>>>	49	|	1130567	1130792	>>>	225	|	-1	<<<	BAS1078	ammonium transporter	*	candidate	601	8.4e-22	T		5	RNA	Bacillus_cereus_ATCC_10987_chromosome<>Bacillus_cereus_ATCC14579_chromosome<>Bacillus_thuringiensis_konkukian_chromosome<>Bacillus_cereus_ZK_chromosome<>Bacillus_thuringiensis_Al_Hakam_chromosome	NC_003210_rliB(+)_+_(hom|rev)|NC_002745_T1box9(-)_-_(hom)	25	Candidate_271_NC_005945(anti),Candidate_585_NC_005945(para),Candidate_598_NC_005945(para),Candidate_803_NC_005945(para),Candidate_713_NC_005945(para),Candidate_619_NC_005945(para),Candidate_469_NC_005945(para),Candidate_775_NC_005945(para),Candidate_550_NC_005945(para),Candidate_551_NC_005945(para),Candidate_241_NC_005945(para),Candidate_242_NC_005945(para),Candidate_584_NC_005945(para),Candidate…	-	-	-	-
Bacillus_anthracis_str_Sterne	|	Candidate_279_NC_005945	|	BAS1186		hypothetical protein	*	>>>	2	|	1231898	1232220	>>>	322	|	322	<<<	trRNA	trRNA	*	candidate	925	7.3e-36	B		2	COD	Bacillus_cereus_ZK_chromosome<>Bacillus_thuringiensis_Al_Hakam_chromosome	NC_002745_Lysine2(-)_-_(hom)	1	Candidate_280_NC_005945(opp)	-	-	-	-
Bacillus_anthracis_str_Sterne	|	Candidate_294_NC_005945	|	BAS1359		hypothetical protein	*	>>>	-2	|	1389597	1389796	<<<	199	|	95	<<<	BAS1360	hypothetical protein	*	candidate	935	2.7e-36	T		5	RNA	Bacillus_cereus_ATCC_10987_chromosome<>Bacillus_thuringiensis_konkukian_chromosome<>Bacillus_cereus_ZK_chromosome<>Bacillus_thuringiensis_Al_Hakam_chromosome<>Bacillus_cereus_cytotoxis_NVH_391-98_chromosome	NC_000964_S_box6(+)_+_(hom|rev)	0	-	-	-	-	-B.subtilis_sigG_1(8.2|-231)
Bacillus_anthracis_str_Sterne	|	Candidate_296_NC_005945	|	BAS1366		hypothetical protein	*	<<<	130	|	1396588	1396647	<<<	59	|	118	<<<	BAS1367	histidine kinase A	*	candidate	936	2.6e-36	T		2	COD	Bacillus_thuringiensis_konkukian_chromosome<>Bacillus_cereus_ZK_chromosome	NC_002745_T1box1(+)_+_(hom|rev)	2	Candidate_317_NC_005945(para),Candidate_318_NC_005945(para)	-	-	-	-Multi_Fur(11.4|-128)
Bacillus_anthracis_str_Sterne	|	Candidate_309_NC_005945	|	BAS1489		5'-3' exonuclease family protein	*	>>>	171	|	1512877	1513251	>>>	374	|	287	>>>	BAS1490	acyltransferase family protein	*	candidate	1332	1.6e-54	B		2	RNA	Bacillus_cereus_ZK_chromosome<>Bacillus_thuringiensis_Al_Hakam_chromosome	NC_002745_sprC(-)_-_(hom)	2	Candidate_135_NC_005945(anti),Candidate_491_NC_005945(para),Candidate_726_NC_005945(para)	-	-	-	-
Bacillus_anthracis_str_Sterne	|	Candidate_312_NC_005945	|	BAS1523		transcriptional regulator, MerR family	*	>>>	1	|	1555565	1555665	>>>	100	|	36	>>>	BAS1524	MATE efflux family protein, putative	*	candidate	645	4.9e-23	T		4	-	Bacillus_cereus_ATCC14579_chromosome<>Bacillus_thuringiensis_konkukian_chromosome<>Bacillus_cereus_ZK_chromosome<>Bacillus_thuringiensis_Al_Hakam_chromosome	NC_002745_RNAIII(-)_-_(hom|rev)	0	-	-	5	-	-
Bacillus_anthracis_str_Sterne	|	Candidate_322_NC_005945	|	BAS1629		cation efflux family protein	*	>>>	1	|	1647177	1647598	>>>	421	|	-3	<<<	BAS1630	transcriptional regulator, GntR family	*	candidate	2091	7.9e-89	T		3	RNA	Bacillus_thuringiensis_konkukian_chromosome<>Bacillus_cereus_ZK_chromosome<>Bacillus_thuringiensis_Al_Hakam_chromosome	NC_000964_Purine1(-)_-_(hom|rev)|NC_003210_rliH(+)_+_(hom|rev)	0	-	-	-	-	-Multi_Fur(12.72|-261)B.subtilis_sigA_2(11.08|-291)
Bacillus_anthracis_str_Sterne	|	Candidate_323_NC_005945	|	BAS1635		hypothetical protein	*	>>>	104	|	1653550	1653610	>>>	60	|	167	>>>	BAS1636	Na+/H+ antiporter NhaC	*	candidate	730	3.5e-27	T		5	RNA	Bacillus_cereus_ATCC_10987_chromosome<>Bacillus_thuringiensis_konkukian_chromosome<>Bacillus_cereus_ZK_chromosome<>Bacillus_thuringiensis_Al_Hakam_chromosome<>Bacillus_cereus_cytotoxis_NVH_391-98_chromosome	NC_000964_SR1(+)_+_(hom)	2	Candidate_416_NC_005945(para),Candidate_63_NC_005945(para)	-	-	-	-B.subtilis_sigG_3(8.07|-58)
Bacillus_anthracis_str_Sterne	|	Candidate_327_NC_005945	|	BAS1724		hydrolase, alpha/beta fold family	*	>>>	1	|	1744603	1744860	>>>	257	|	165	>>>	BAS1725	methyl-accepting/DNA response regulator,	*	candidate	1971	2e-83	B		1	RNA	Bacillus_cereus_ZK_chromosome	NC_003210_S_box6(-)_-_(hom)	0	Candidate_133_NC_005945(anti)	-	-	-	-
Bacillus_anthracis_str_Sterne	|	Candidate_336_NC_005945	|	BAS1858		transition state transcriptional regulatory	*	>>>	1	|	1882434	1882509	>>>	75	|	197	>>>	BAS1859	intracellular serine protease	*	candidate	1352	2.9e-55	T		5	RNA	Bacillus_cereus_ATCC_10987_chromosome<>Bacillus_cereus_ATCC14579_chromosome<>Bacillus_thuringiensis_konkukian_chromosome<>Bacillus_cereus_ZK_chromosome<>Bacillus_thuringiensis_Al_Hakam_chromosome	NC_002745_sprF(+)_+_(hom|rev)	0	-	-	-	-	-
Bacillus_anthracis_str_Sterne	|	Candidate_353_NC_005945	|	BAS2176		hypothetical protein	*	>>>	694	|	2171465	2171665	<<<	200	|	2	<<<	BAS2177	hypothetical protein	*	candidate	2259	7.5e-97	B		4	-	Bacillus_cereus_ATCC_10987_chromosome<>Bacillus_thuringiensis_konkukian_chromosome<>Bacillus_cereus_ZK_chromosome<>Bacillus_thuringiensis_Al_Hakam_chromosome	NC_005072_yfr3(+)_+_(hom)	3	Candidate_683_NC_005945(opp),Candidate_124_NC_005945(para),Candidate_163_NC_005945(para)	-	-	-	-B.subtilis_sigK_3(10.68|-70)B.subtilis_sigA_3(9.49|-177)
Bacillus_anthracis_str_Sterne	|	Candidate_356_NC_005945	|	BAS2194		homoserine/threonine efflux protein, putative	*	<<<	100	|	2191120	2191178	<<<	58	|	24	<<<	BAS2195	enoyl-CoA hydratase	*	candidate	526	6.4e-18	T		4	RNA	Bacillus_cereus_ATCC_10987_chromosome<>Bacillus_cereus_ATCC14579_chromosome<>Bacillus_thuringiensis_konkukian_chromosome<>Bacillus_cereus_ZK_chromosome	NC_002516_P8_yes(+)_+_(hom|rev)	2	Candidate_285_NC_005945(para),Candidate_642_NC_005945(para)	-	-	-	-
Bacillus_anthracis_str_Sterne	|	Candidate_359_NC_005945	|	BAS2221		RNA pseudouridylate synthase	*	>>>	101	|	2224829	2225098	>>>	269	|	280	>>>	BAS2222	threonyl-tRNA synthetase	*	candidate	1082	2.4e-43	T		10	RNA	Bacillus_subtilis_chromosome<>Bacillus_cereus_ATCC_10987_chromosome<>Bacillus_cereus_ATCC14579_chromosome<>Bacillus_thuringiensis_konkukian_chromosome<>Bacillus_licheniformis_ATCC_14580_chromosome<>Bacillus_cereus_ZK_chromosome<>Bacillus_licheniformis_DSM_13_chromosome<>Bacillus_clausii_KSM-K16_chromosome<>Bacillus_thuringiensis_Al_Hakam_chromosome<>Bacillus_cereus_cytotoxis_NVH_391-98_chromosome	NC_000964_T1box15(-)_-_(hom)|NC_000964_T1box16(-)_-_(hom)|NC_000964_T1box17(-)_-_(hom)	1	T-box_NC_005945(para)	T1box15_NC_000964|3'(0),T1box16_NC_000964|3'(0),T1box17_NC_000964|3'(0),T1box6_NC_003210|3'(0),T1box8_NC_002745|3'(0),T1box12_NC_000964|3'(0)	-	-	-B.subtilis_sigK_1(9.6|-273)B.subtilis_sigK_3(10.26|-273)B.subtilis_sigG_1(8.18|-287)
Bacillus_anthracis_str_Sterne	|	Candidate_362_NC_005945	|	BAS2238		hypothetical protein	*	>>>	1	|	2241217	2241463	>>>	246	|	49	<<<	BAS2239	hypothetical protein	*	candidate	1351	8.9e-56	T		3	RNA	Bacillus_thuringiensis_konkukian_chromosome<>Bacillus_cereus_ZK_chromosome<>Bacillus_thuringiensis_Al_Hakam_chromosome	NC_002745_T1box6(+)_+_(hom)	0	Candidate_361_NC_005945(anti)	-	-	-	-
Bacillus_anthracis_str_Sterne	|	Candidate_387_NC_005945	|	BAS2353		hemolysin II, C-terminal	*	>>>	124	|	2353884	2353996	>>>	112	|	293	>>>	BAS2354	transcriptional regulator, TetR family	*	candidate	1867	1.1e-78	B		4	RNA	Bacillus_cereus_ATCC14579_chromosome<>Bacillus_thuringiensis_konkukian_chromosome<>Bacillus_cereus_ZK_chromosome<>Bacillus_thuringiensis_Al_Hakam_chromosome	NC_003210_S_box3(-)_-_(hom|rev)	0	Candidate_123_NC_005945(anti)	-	-	-	-B.subtilis_sigG_1(8.91|-152)
Bacillus_anthracis_str_Sterne	|	Candidate_393_NC_005945	|	BAS2444		hypothetical protein	*	>>>	12	|	2442584	2442822	<<<	238	|	46	<<<	BAS2445	hypothetical protein	*	candidate	548	6.7e-19	T		5	RNA	Bacillus_cereus_ATCC_10987_chromosome<>Bacillus_cereus_ATCC14579_chromosome<>Bacillus_thuringiensis_konkukian_chromosome<>Bacillus_cereus_ZK_chromosome<>Bacillus_thuringiensis_Al_Hakam_chromosome	NC_002505_B2(-)_-_(hom|rev)	2	Candidate_23_NC_005945(anti),Candidate_232_NC_005945(para),Candidate_820_NC_005945(para)	-	-	-	-B.subtilis_sigG_1(8.34|-276)B.subtilis_sigA_2(9.31|-295)B.subtilis_sigA_3(9.9|-272)
Bacillus_anthracis_str_Sterne	|	Candidate_462_NC_005945	|	BAS3163		acetyltransferase, GNAT family	*	>>>	1	|	3137549	3138025	>>>	476	|	-2	<<<	BAS3164	hypothetical protein	*	candidate	2362	4e-101	B		4	RNA	Bacillus_cereus_ATCC14579_chromosome<>Bacillus_thuringiensis_konkukian_chromosome<>Bacillus_cereus_ZK_chromosome<>Bacillus_thuringiensis_Al_Hakam_chromosome	NC_000964_ydaO1yuaA1(+)_+_(hom)|NC_000964_ydaO1yuaA2(+)_+_(hom)	1	ydaO-yuaA_NC_005945(para)	-	-	-	-B.subtilis_sigA_2(9.58|-447)
Bacillus_anthracis_str_Sterne	|	Candidate_464_NC_005945	|	BAS3190		enhancin family protein	*	<<<	229	|	3168558	3168633	<<<	75	|	37	<<<	BAS3191	hypothetical protein	*	candidate	918	9.4e-36	B		2	RNA	Bacillus_cereus_ATCC14579_chromosome<>Bacillus_cereus_ZK_plasmid_pE33L466	NC_003210_Purine1(-)_-_(hom|rev)	0	Candidate_32_NC_005945(anti)	-	-	-	-
Bacillus_anthracis_str_Sterne	|	Candidate_486_NC_005945	|	BAS3325		acetyltransferase, GNAT family	*	>>>	2	|	3293884	3294198	>>>	314	|	-22	<<<	BAS3326	glyoxalase family protein	*	candidate	1416	3.2e-58	T		1	RNA	Bacillus_thuringiensis_Al_Hakam_chromosome	NC_005072_yfr3(+)_+_(hom|rev)	0	-	-	-	-	-
Bacillus_anthracis_str_Sterne	|	Candidate_509_NC_005945	|	BAS3603		hypothetical protein	*	<<<	152	|	3558143	3558193	<<<	50	|	154	<<<	BAS3604	1-phosphatidylinositol phosphodiesterase	*	candidate	679	9e-25	B		4	RNA	Bacillus_cereus_ATCC14579_chromosome<>Bacillus_thuringiensis_konkukian_chromosome<>Bacillus_cereus_ZK_chromosome<>Bacillus_thuringiensis_Al_Hakam_chromosome	NC_002745_sprC(-)_-_(hom)	0	-	-	-	-	-
Bacillus_anthracis_str_Sterne	|	Candidate_536_NC_005945	|	BAS3965		N-acetylglucosamine-6-phosphate deacetylase	*	<<<	99	|	3911402	3911499	<<<	97	|	11	<<<	BAS3966	metallo-beta-lactamase family protein	*	candidate	808	1.4e-30	T		6	RNA	Bacillus_cereus_ATCC_10987_chromosome<>Bacillus_cereus_ATCC14579_chromosome<>Bacillus_thuringiensis_konkukian_chromosome<>Bacillus_cereus_ZK_chromosome<>Bacillus_thuringiensis_Al_Hakam_chromosome<>Bacillus_cereus_cytotoxis_NVH_391-98_chromosome	NC_002745_sprC(-)_-_(hom)	0	-	-	-	-	-B.subtilis_sigA_1(10.06|-51)B.subtilis_sigA_1(10.06|-143)B.subtilis_sigA_2(9.04|-51)
Bacillus_anthracis_str_Sterne	|	Candidate_545_NC_005945	|	BAS4212		chaperone protein dnaJ	*	<<<	134	|	4127958	4128027	<<<	69	|	0	<<<	BAS4213	molecular chaperone DnaK	*	candidate	329	5.6e-26	T		6	RNA	Bacillus_cereus_ATCC_10987_chromosome<>Bacillus_cereus_ATCC14579_chromosome<>Bacillus_thuringiensis_konkukian_chromosome<>Bacillus_cereus_ZK_chromosome<>Bacillus_thuringiensis_Al_Hakam_chromosome<>Bacillus_cereus_cytotoxis_NVH_391-98_chromosome	NC_000964_SurC(+)_+_(hom|rev)|NC_000964_SurC(+)_+_(hom)	0	-	tpke11_NC_000913|UD(5'(0-0)|3'(0-0))	3	-	-
Bacillus_anthracis_str_Sterne	|	Candidate_549_NC_005945	|	BAS4287		hypothetical protein	*	>>>	-1	|	4197979	4198161	<<<	182	|	0	<<<	BAS4288	hypothetical protein	*	candidate	910	8.4e-36	T		3	RNA	Bacillus_thuringiensis_konkukian_chromosome<>Bacillus_cereus_ZK_chromosome<>Bacillus_thuringiensis_Al_Hakam_chromosome	NC_002745_sprC(-)_-_(hom|rev)	0	-	-	-	-	-
Bacillus_anthracis_str_Sterne	|	Candidate_567_NC_005945	|	BAS4596		aminoglycoside phosphotransferase family	*	<<<	99	|	4497479	4497608	<<<	129	|	0	<<<	BAS4597	pullulanase, putative	*	candidate	1145	7.7e-46	T		5	-	Bacillus_cereus_ATCC_10987_chromosome<>Bacillus_cereus_ATCC14579_chromosome<>Bacillus_thuringiensis_konkukian_chromosome<>Bacillus_cereus_ZK_chromosome<>Bacillus_thuringiensis_Al_Hakam_chromosome	NC_003210_lhrC(+)_+_(hom|rev)	0	-	-	-	-	-
Bacillus_anthracis_str_Sterne	|	Candidate_580_NC_005945	|	BAS4783		hypothetical protein	*	>>>	8	|	4673679	4673928	>>>	249	|	89	>>>	BAS4784	glycyl-tRNA synthetase	*	candidate	1103	1.8e-44	T		6	RNA	Bacillus_cereus_ATCC_10987_chromosome<>Bacillus_cereus_ATCC14579_chromosome<>Bacillus_thuringiensis_konkukian_chromosome<>Bacillus_cereus_ZK_chromosome<>Bacillus_thuringiensis_Al_Hakam_chromosome<>Bacillus_cereus_cytotoxis_NVH_391-98_chromosome	NC_000964_T1box7(-)_-_(hom)|NC_003210_T1box2(-)_-_(hom)|NC_002745_T1box7(-)_-_(hom)	2	T-box_NC_005945(para),Candidate_658_NC_005945(para)	-	-	RS	-
Bacillus_anthracis_str_Sterne	|	Candidate_592_NC_005945	|	BAS4933		hypothetical protein	*	>>>	37	|	4816412	4816716	>>>	304	|	93	>>>	BAS4934	hypothetical protein	*	candidate	709	2.2e-26	T		6	RNA	Bacillus_cereus_ATCC_10987_chromosome<>Bacillus_cereus_ATCC14579_chromosome<>Bacillus_thuringiensis_konkukian_chromosome<>Bacillus_cereus_ZK_chromosome<>Bacillus_thuringiensis_Al_Hakam_chromosome<>Bacillus_cereus_cytotoxis_NVH_391-98_chromosome	NC_000964_ykkC1yxkD2(-)_-_(hom)	0	-	-	-	-	-B.subtilis_sigG_2(8.7|-254)
Bacillus_anthracis_str_Sterne	|	Candidate_595_NC_005945	|	BAS4936		tyrosyl-tRNA synthetase	*	<<<	31	|	4820074	4820406	<<<	332	|	0	<<<	BAS4937	UDP-N-acetylenolpyruvoylglucosamine reductase	*	candidate	1787	4.9e-75	B		5	RNA	Bacillus_cereus_ATCC_10987_chromosome<>Bacillus_cereus_ATCC14579_chromosome<>Bacillus_thuringiensis_konkukian_chromosome<>Bacillus_cereus_ZK_chromosome<>Bacillus_thuringiensis_Al_Hakam_chromosome	NC_002745_T1box8(-)_-_(hom)|NC_002745_T1box1(+)_+_(hom)	0	-	T1box7_NC_003210|3'(0),T1box9_NC_002745|3'(0),T1box13_NC_000964|3'(0)	-	-	-B.subtilis_sigG_1(8.74|-298)B.subtilis_sigA_2(12.5|-255)
Bacillus_anthracis_str_Sterne	|	Candidate_631_NC_005945	|	BAS1080		DNA-binding protein	*	>>>	18	|	1134692	1135002	<<<	310	|	505	<<<	BAS1081	hypothetical protein	*	candidate	1568	4.3e-65	Z		1	RNA	Bacillus_cereus_ATCC_10987_chromosome	NC_002745_RNAIII(-)_-_(hom|rev)	5	Candidate_274_NC_005945(opp),Candidate_253_NC_005945(para),Candidate_708_NC_005945(para),Candidate_257_NC_005945(para),Candidate_833_NC_005945(para)	-	-	-	-B.subtilis_sigG_3(9.43|-284)
Bacillus_anthracis_str_Sterne	|	Candidate_646_NC_005945	|	BAS1338		sodium-dependent transporter, putative	*	>>>	-1	|	1371435	1371654	<<<	219	|	41	<<<	BAS1339	peptidase, M23/M37 family	*	candidate	972	4.1e-38	Z		3	RNA	Bacillus_thuringiensis_konkukian_chromosome<>Bacillus_cereus_ZK_chromosome<>Bacillus_thuringiensis_Al_Hakam_chromosome	NC_002745_sprC(-)_-_(hom)	0	Candidate_292_NC_005945(anti)	-	-	-	-B.subtilis_sigG_2(8.64|-149)
Bacillus_anthracis_str_Sterne	|	Candidate_653_NC_005945	|	BAS1473		macrolide 2-phosphotransferase, putative	*	<<<	102	|	1496351	1496781	<<<	430	|	0	>>>	BAS1474	methionine aminopeptidase	*	candidate	2526	1.4e-108	X		3	RNA	Bacillus_thuringiensis_konkukian_chromosome<>Bacillus_cereus_ZK_chromosome<>Bacillus_thuringiensis_Al_Hakam_chromosome	NC_003210_rliB(+)_+_(hom|rev)	0	-	-	-	-	-B.subtilis_sigG_3(9.3|-286)
Bacillus_anthracis_str_Sterne	|	Candidate_658_NC_005945	|	BAS1700		polysaccharide biosynthesis family protein	*	<<<	65	|	1720919	1721407	>>>	488	|	190	>>>	BAS1701	sodium-dependent transporter	*	candidate	2817	7e-122	X		1	RNA	Bacillus_cereus_ATCC14579_chromosome	NC_000964_T1box1(+)_+_(hom)|NC_003210_T1box1(+)_+_(hom)|NC_000964_T1box5(+)_+_(hom)|NC_000964_T1box13(-)_-_(hom)|NC_003210_T1box14(-)_-_(hom)|NC_002745_T1box7(-)_-_(hom)|NC_002745_T1box8(-)_-_(hom)|NC_000964_T1box7(-)_-_(hom)|NC_003210_T1box7(-)_-_(hom)|NC_000964_T1box18(+)_+_(hom)|NC_003210_T1box13(+)_+_(hom)|NC_002745_T1box4(+)_+_(hom)|NC_000964_T1box9(-)_-_(hom)	13	T-box_NC_005945(para),Candidate_752_NC_005945(para),T-box_NC_005945(para),T-box_NC_005945(para),T-box_NC_005945(para),Candidate_668_NC_005945(para),T-box_NC_005945(para),T-box_NC_005945(para),T-box_NC_005945(para),T-box_NC_005945(para),Candidate_146_NC_005945(para),Candidate_147_NC_005945(para),T-box_NC_005945(para)	-	-	-	-B.subtilis_sigG_2(8.44|-390)
Bacillus_anthracis_str_Sterne	|	Candidate_668_NC_005945	|	BAS0014		glutamine amidotransferase, SNO family	*	>>>	61	|	20073	20309	>>>	236	|	29	>>>	BAS0015	seryl-tRNA synthetase	*	candidate	197	9.3e-16	Z		8	RNA	Bacillus_halodurans_chromosome<>Bacillus_cereus_ATCC_10987_chromosome<>Oceanobacillus_iheyensis_chromosome<>Bacillus_cereus_ATCC14579_chromosome<>Bacillus_thuringiensis_konkukian_chromosome<>Bacillus_cereus_ZK_chromosome<>Bacillus_thuringiensis_Al_Hakam_chromosome<>Bacillus_cereus_cytotoxis_NVH_391-98_chromosome	NC_000964_T1box1(+)_+_(hom)|NC_003210_T1box14(-)_-_(hom)|NC_002745_T1box1(+)_+_(hom)|NC_003210_T1box12(+)_+_(hom)|NC_003210_T1box7(-)_-_(hom)|NC_000964_T1box2(+)_+_(hom)|NC_000964_T1box9(-)_-_(hom)|NC_000964_T1box7(-)_-_(hom)	9	Candidate_658_NC_005945(para),T-box_NC_005945(para),T-box_NC_005945(para),T-box_NC_005945(para),T-box_NC_005945(para),T-box_NC_005945(para),T-box_NC_005945(para),Candidate_14_NC_005945(para),T-box_NC_005945(para)	T1box1_NC_000964|UD(5'(0-0)|3'(1-1)),T1box14_NC_003210|3'(0),T1box1_NC_002745|3'(0)	5	RS	-
Bacillus_anthracis_str_Sterne	|	Candidate_700_NC_005945	|	BAS2737		sulfatase	*	<<<	22	|	2713589	2714075	>>>	486	|	7	<<<	BAS2738	ABC transporter, ATP-binding protein	*	candidate	2402	6e-103	X		1	RNA	Bacillus_thuringiensis_Al_Hakam_chromosome	NC_002745_RFN1(-)_-_(hom|rev)|NC_002745_RNAIII(-)_-_(hom|rev)	0	-	-	-	-	-B.subtilis_sigG_1(8.08|-379)
Bacillus_anthracis_str_Sterne	|	Candidate_701_NC_005945	|	BAS2738		ABC transporter, ATP-binding protein	*	<<<	305	|	2716014	2716066	<<<	52	|	19	<<<	BAS2739	hypothetical protein	*	candidate	1722	4.2e-72	Z		5	RNA	Bacillus_cereus_ATCC_10987_chromosome<>Bacillus_cereus_ATCC14579_chromosome<>Bacillus_thuringiensis_konkukian_chromosome<>Bacillus_cereus_ZK_chromosome<>Bacillus_thuringiensis_Al_Hakam_chromosome	NC_003210_rliB(+)_+_(hom)	2	Candidate_702_NC_005945(anti),Candidate_423_NC_005945(para),Candidate_171_NC_005945(para)	-	3	-	-B.subtilis_sigG_3(8.38|-133)
Bacillus_anthracis_str_Sterne	|	Candidate_702_NC_005945	|	BAS2738		ABC transporter, ATP-binding protein	*	<<<	1	|	2715710	2716048	>>>	338	|	37	<<<	BAS2739	hypothetical protein	*	candidate	1722	4.2e-72	X		5	RNA	Bacillus_cereus_ATCC_10987_chromosome<>Bacillus_cereus_ATCC14579_chromosome<>Bacillus_thuringiensis_konkukian_chromosome<>Bacillus_cereus_ZK_chromosome<>Bacillus_thuringiensis_Al_Hakam_chromosome	NC_003210_rliB(+)_+_(hom|rev)	2	Candidate_701_NC_005945(anti),Candidate_423_NC_005945(para),Candidate_171_NC_005945(para)	-	-	-	-B.subtilis_sigA_1(9.06|-474)
Bacillus_anthracis_str_Sterne	|	Candidate_704_NC_005945	|	BAS0024		hypothetical protein	*	>>>	-4	|	28397	28549	<<<	152	|	65	>>>	BAS0025	sigma-k factor processing regulatory protein	*	candidate	688	5.2e-25	X		3	RNA	Bacillus_thuringiensis_konkukian_chromosome<>Bacillus_cereus_ZK_chromosome<>Bacillus_thuringiensis_Al_Hakam_chromosome	NC_003210_rliE(+)_+_(hom|rev)	0	-	-	-	-	-
Bacillus_anthracis_str_Sterne	|	Candidate_717_NC_005945	|	BAS3266		hypothetical protein	*	<<<	291	|	3233497	3233800	<<<	303	|	35	<<<	BAS3267	hypothetical protein	*	candidate	773	1.9e-29	Y		4	RNA	Bacillus_cereus_ATCC14579_chromosome<>Bacillus_thuringiensis_konkukian_chromosome<>Bacillus_cereus_ZK_chromosome<>Bacillus_thuringiensis_Al_Hakam_chromosome	NC_002745_RFN1(-)_-_(hom)	3	Candidate_34_NC_005945(anti),Candidate_718_NC_005945(anti),Candidate_258_NC_005945(para),Candidate_833_NC_005945(para),Candidate_124_NC_005945(para)	-	-	-	-B.subtilis_sigG_3(8.08|-186)
Bacillus_anthracis_str_Sterne	|	Candidate_718_NC_005945	|	BAS3266		hypothetical protein	*	<<<	331	|	3233537	3233775	>>>	238	|	60	<<<	BAS3267	hypothetical protein	*	candidate	773	1.9e-29	X		1	RNA	Bacillus_cereus_ATCC14579_chromosome	NC_002745_RFN1(-)_-_(hom|rev)	4	Candidate_34_NC_005945(tandem),Candidate_717_NC_005945(anti),Candidate_258_NC_005945(para),Candidate_833_NC_005945(para),Candidate_124_NC_005945(para)	-	-	-	-B.subtilis_sigG_3(8.05|-84)
Bacillus_anthracis_str_Sterne	|	Candidate_740_NC_005945	|	BAS0343		hypothetical protein	*	>>>	7	|	369032	369482	<<<	450	|	1	>>>	BAS0344	sensor histidine kinase, C-terminus	*	candidate	2084	7.8e-89	X		2	RNA	Bacillus_cereus_ZK_chromosome<>Bacillus_thuringiensis_Al_Hakam_chromosome	NC_000913_IS063_tke8_micC(+)_+_(hom)	0	-	-	-	-	-B.subtilis_sigG_2(10.22|-259)B.subtilis_sigG_3(8.64|-88)
Bacillus_anthracis_str_Sterne	|	Candidate_748_NC_005945	|	BAS3875		protein-glutamine gamma-glutamyltransferase	*	>>>	-2	|	3825892	3826090	<<<	198	|	0	<<<	BAS3876	hypothetical protein	*	candidate	976	1.1e-38	Z		3	-	Bacillus_thuringiensis_konkukian_chromosome<>Bacillus_cereus_ZK_chromosome<>Bacillus_thuringiensis_Al_Hakam_chromosome	NC_000964_SR1(+)_+_(hom)	0	-	-	-	-	-
Bacillus_anthracis_str_Sterne	|	Candidate_752_NC_005945	|	BAS4029		hypothetical protein	*	<<<	11	|	3965090	3965549	>>>	459	|	143	>>>	BAS4030	Na+/H+ antiporter NhaC	*	candidate	580	2.4e-27	X		6	RNA	Bacillus_cereus_ATCC_10987_chromosome<>Bacillus_cereus_ATCC14579_chromosome<>Bacillus_thuringiensis_konkukian_chromosome<>Bacillus_cereus_ZK_chromosome<>Bacillus_thuringiensis_Al_Hakam_chromosome<>Bacillus_cereus_cytotoxis_NVH_391-98_chromosome	NC_000964_T1box18(+)_+_(hom)|NC_003210_T1box1(+)_+_(hom)|NC_000964_T1box5(+)_+_(hom)|NC_000964_T1box13(-)_-_(hom)|NC_000964_T1box1(+)_+_(hom)|NC_002745_T1box8(-)_-_(hom)|NC_000964_T1box3(-)_-_(hom)|NC_000964_T1box10(-)_-_(hom)|NC_003210_T1box7(-)_-_(hom)|NC_002745_T1box7(-)_-_(hom)	7	Candidate_658_NC_005945(para),T-box_NC_005945(para),T-box_NC_005945(para),T-box_NC_005945(para),T-box_NC_005945(para),T-box_NC_005945(para),T-box_NC_005945(para)	-	-	-	-
Bacillus_anthracis_str_Sterne	|	Candidate_753_NC_005945	|	BAS4064		cell division protein, FtsW/RodA/SpoVE family	*	<<<	19	|	3995512	3995833	>>>	321	|	0	<<<	BAS4065	dihydrolipoamide acetyltransferase	*	candidate	1588	5.3e-66	X		5	RNA	Bacillus_cereus_ATCC_10987_chromosome<>Bacillus_thuringiensis_konkukian_chromosome<>Bacillus_cereus_ZK_chromosome<>Bacillus_thuringiensis_Al_Hakam_chromosome<>Bacillus_cereus_cytotoxis_NVH_391-98_chromosome	NC_002745_sprC(-)_-_(hom|rev)	0	-	-	-	-	-
Bacillus_anthracis_str_Sterne	|	Candidate_819_NC_005945	|	BAS0548		malate dehydrogenase, putative	*	>>>	3	|	589730	590002	<<<	272	|	19	<<<	BAS0549	lipoprotein, putative	*	candidate	561	1.1e-19	Z		5	RNA	Bacillus_cereus_ATCC_10987_chromosome<>Bacillus_cereus_ATCC14579_chromosome<>Bacillus_thuringiensis_konkukian_chromosome<>Bacillus_cereus_ZK_chromosome<>Bacillus_thuringiensis_Al_Hakam_chromosome	NC_002745_T1box4(+)_+_(hom)	2	Candidate_155_NC_005945(para),Candidate_229_NC_005945(para)	-	-	-	-B.subtilis_sigG_2(9.09|-323)
Bacillus_anthracis_str_Sterne	|	Candidate_831_NC_005945	|	BAS0892		protein-export membrane protein-related protein	*	>>>	1	|	954893	955171	>>>	278	|	67	<<<	BAS0893	hypothetical protein	*	candidate	1580	1.2e-65	Z		5	RNA	Bacillus_cereus_ATCC_10987_chromosome<>Bacillus_cereus_ATCC14579_chromosome<>Bacillus_thuringiensis_konkukian_chromosome<>Bacillus_cereus_ZK_chromosome<>Bacillus_thuringiensis_Al_Hakam_chromosome	NC_002505_B2(-)_-_(hom|rev)	2	Candidate_252_NC_005945(anti),Candidate_832_NC_005945(para),Candidate_254_NC_005945(para)	-	-	-	-B.subtilis_sigG_1(8.21|-181)
Bacillus_anthracis_str_Sterne	|	Purine_NC_005945	|	BAS0254		bifunctional GMP synthase/glutamine	*	>>>	19	|	262479	262771	>>>	292	|	72	>>>	BAS0255	xanthine/uracil permease family protein	*	Purine	1156	1.5e-46	R		5	RNA	Bacillus_cereus_ATCC14579_chromosome<>Bacillus_thuringiensis_konkukian_chromosome<>Bacillus_cereus_ZK_chromosome<>Bacillus_thuringiensis_Al_Hakam_chromosome<>Bacillus_cereus_cytotoxis_NVH_391-98_chromosome	NC_000964_Purine4(-)_-_(hom)|NC_000964_Purine2(+)_+_(hom)|NC_000964_Purine3(+)_+_(hom)|NC_000964_Purine5(+)_+_(hom)|NC_003210_Purine2(-)_-_(hom)|NC_002745_Purine(+)_+_(hom)	1	Purine_NC_005945(para)	Purine2_NC_000964|UD(5'(0-0)|3'(0-0)),Purine1_NC_003210|3'(0),Purine2_NC_003210|3'(0),Purine4_NC_000964|3'(0),Purine_NC_002745|3'(0)	5	RS	-B.subtilis_sigG_3(9.3|-142)B.subtilis_sigA_2(9.46|-174)
Bacillus_anthracis_str_Sterne	|	TPP_NC_005945	|	BAS0690		peptidase, M23/M37 family	*	<<<	1	|	751726	752144	>>>	418	|	210	>>>	BAS0691	transcriptional activator TenA, putative	*	TPP	152	1.6e-17	R		5	RNA	Bacillus_cereus_ATCC_10987_chromosome<>Bacillus_thuringiensis_konkukian_chromosome<>Bacillus_cereus_ZK_chromosome<>Bacillus_thuringiensis_Al_Hakam_chromosome<>Bacillus_cereus_cytotoxis_NVH_391-98_chromosome	NC_002745_THI1(-)_-_(hom)|NC_000913_THI1(-)_-_(hom)	2	TPP_NC_005945(para),TPP_NC_005945(para)	THI2_NC_000964|3'(0),THI1_NC_000964|3'(0),THI1_NC_002505|3'(0),THI2_NC_000913|3'(0),THI_NC_002516|3'(0),THI1_NC_003112|3'(0),THI_NC_005072|3'(0)	-	-	-
Bacillus_anthracis_str_Sterne	|	FMN_NC_005945	|	BAS1390		hypothetical protein	*	<<<	2	|	1422388	1422855	>>>	467	|	79	>>>	BAS1391	hypothetical protein	*	FMN	658	3.2e-24	R		8	RNA	Bacillus_cereus_ATCC_10987_chromosome<>Bacillus_cereus_ATCC14579_chromosome<>Bacillus_thuringiensis_konkukian_chromosome<>Bacillus_licheniformis_ATCC_14580_chromosome<>Bacillus_cereus_ZK_chromosome<>Bacillus_licheniformis_DSM_13_chromosome<>Bacillus_thuringiensis_Al_Hakam_chromosome<>Bacillus_cereus_cytotoxis_NVH_391-98_chromosome	NC_002745_RFN1(-)_-_(hom)|NC_000964_RFN2(-)_-_(hom)|NC_002745_RFN2(-)_-_(hom)|NC_003210_RFN(-)_-_(hom)	1	Candidate_751_NC_005945(para)	RFN1_NC_000964|3'(0)	5	RS	-B.subtilis_sigA_2(11.28|-242)
Bacillus_anthracis_str_Sterne	|	SAM_NC_005945	|	BAS2459		aspartate racemase family protein	*	<<<	135	|	2459394	2459572	>>>	178	|	94	>>>	BAS2460	hypothetical protein	*	SAM	1289	2e-52	R		5	RNA	Bacillus_cereus_ATCC_10987_chromosome<>Bacillus_cereus_ATCC14579_chromosome<>Bacillus_thuringiensis_konkukian_chromosome<>Bacillus_cereus_ZK_chromosome<>Bacillus_thuringiensis_Al_Hakam_chromosome	NC_000964_S_box2(+)_+_(hom)|NC_003210_S_box7(-)_-_(hom)|NC_000964_S_box10(+)_+_(hom)|NC_003210_S_box2(-)_-_(hom)|NC_003210_S_box5(-)_-_(hom)|NC_000964_S_box7(-)_-_(hom)|NC_000964_S_box11(+)_+_(hom)|NC_003210_S_box3(-)_-_(hom)|NC_000964_S_box9(-)_-_(hom)|NC_002745_S_box4(-)_-_(hom)|NC_000964_S_box8(-)_-_(hom)	9	Candidate_118_NC_005945(anti),Candidate_105_NC_005945(para),SAM_NC_005945(para),SAM_NC_005945(para),SAM_NC_005945(para),SAM_NC_005945(para),SAM_NC_005945(para),Candidate_29_NC_005945(para),SAM_NC_005945(para),SAM_NC_005945(para)	S_box2_NC_003210|UD(5'(1-1)|3'(0-0)),S_box4_NC_000964|UD(5'(1-1)|3'(0-0)),S_box5_NC_000964|UD(5'(1-1)|3'(0-1)),S_box9_NC_000964|UD(5'(1-1)|3'(0-0)),S_box4_NC_002745|3'(0),S_box1_NC_000964|3'(0),S_box2_NC_000964|3'(0),T1box2_NC_002745|3'(0),S_box3_NC_003210|3'(0),S_box7_NC_003210|3'(0),S_box2_NC_002745|3'(0)	-	RS	-
Bacillus_anthracis_str_Sterne	|	SAM_NC_005945	|	BAS4157		bifunctional homocysteine	*	<<<	317	|	4074718	4074933	>>>	215	|	53	>>>	BAS4158	cystathionine beta-lyase	*	SAM	1222	2.2e-49	R		1	RNA	Bacillus_cereus_ATCC14579_chromosome	NC_003210_S_box3(-)_-_(hom)|NC_000964_S_box1(-)_-_(hom)|NC_003210_S_box6(-)_-_(hom)|NC_002745_S_box2(+)_+_(hom)|NC_000964_S_box2(+)_+_(hom)|NC_003210_S_box2(-)_-_(hom)|NC_000964_S_box11(+)_+_(hom)|NC_000964_S_box7(-)_-_(hom)|NC_000964_S_box10(+)_+_(hom)|NC_002745_S_box4(-)_-_(hom)|NC_003210_S_box5(-)_-_(hom)|NC_003210_S_box3(-)_-_(hom|rev)|NC_000964_S_box9(-)_-_(hom)|NC_000964_S_box1(-)_-_(hom|re…	8	Candidate_66_NC_005945(tandem),Candidate_105_NC_005945(anti),SAM_NC_005945(anti),SAM_NC_005945(para),Candidate_118_NC_005945(para),SAM_NC_005945(para),Candidate_29_NC_005945(para),SAM_NC_005945(para),SAM_NC_005945(para),SAM_NC_005945(para)	S_box2_NC_003210|UD(5'(1-1)|3'(0-0)),S_box4_NC_000964|UD(5'(1-1)|3'(0-0)),S_box5_NC_000964|UD(5'(1-1)|3'(0-1)),S_box9_NC_000964|UD(5'(1-1)|3'(0-0)),S_box4_NC_002745|3'(0),S_box1_NC_000964|3'(0),S_box2_NC_000964|3'(0),T1box2_NC_002745|3'(0),S_box3_NC_003210|3'(0),S_box7_NC_003210|3'(0),S_box2_NC_002745|3'(0)	5	RS	-B.subtilis_sigG_3(8.3|-228)
Bacillus_anthracis_str_Sterne	|	T-box_NC_005945	|	BAS3159		tryptophanyl-tRNA synthetase	*	<<<	29	|	3133968	3134053	<<<	85	|	275	>>>	BAS3160	1-deoxy-D-xylulose 5-phosphate reductoisomerase	*	T-box	200	5.3e-17	R		5	RNA	Bacillus_cereus_ATCC_10987_chromosome<>Bacillus_cereus_ATCC14579_chromosome<>Bacillus_thuringiensis_konkukian_chromosome<>Bacillus_cereus_ZK_chromosome<>Bacillus_thuringiensis_Al_Hakam_chromosome	NC_000964_T1box1(+)_+_(hom)|NC_000964_T1box13(-)_-_(hom)|NC_000964_T1box14(-)_-_(hom)|NC_003210_T1box1(+)_+_(hom)|NC_003210_T1box5(-)_-_(hom)|NC_000964_T1box2(+)_+_(hom)|NC_000964_T1box4(+)_+_(hom)|NC_000964_T1box18(+)_+_(hom)|NC_000964_T1box6(+)_+_(hom)|NC_002745_T1box4(+)_+_(hom)|NC_002745_T1box7(-)_-_(hom)|NC_003210_T1box9(-)_-_(hom)|NC_000964_T1box8(-)_-_(hom)|NC_003210_T1box10(-)_-_(hom)	10	T-box_NC_005945(para),T-box_NC_005945(para),T-box_NC_005945(para),T-box_NC_005945(para),T-box_NC_005945(para),Candidate_672_NC_005945(para),T-box_NC_005945(para),T-box_NC_005945(para),T-box_NC_005945(para),T-box_NC_005945(para)	T1box3_NC_000964|UD(5'(1-1)|3'(0-0)),T1box12_NC_003210|UD(5'(1-1)|3'(0-0)),T1box4_NC_002745|UD(5'(0-0)|3'(0-0)),T1box7_NC_003210|UD(5'(0-1)|3'(0-0)),T1box5_NC_000964|UD(5'(0-0)|3'(0-0)),T1box8_NC_000964|UD(5'(1-1)|3'(0-0)),T1box4_NC_003210|UD(5'(1-1)|3'(0-0)),T1box10_NC_000964|UD(5'(0-0)|3'(1-1)),Lysine2_NC_002745|UD(5'(1-1)|3'(1-1)),T1box12_NC_000964|UD(5'(0-0)|3'(0-0)),T1box6_NC_003210|UD(5'(1-…	5	RS	-
Bacillus_anthracis_str_Sterne	|	SRP_bact_NC_005945	|	BAS0020		cytidine/deoxycytidylate deaminase zinc-binding	*	>>>	81	|	25118	25429	>>>	311	|	83	>>>	BAS0021	DNA polymerase III subunits gamma and tau	*	SRP_bact	825	1.1e-31	B		58	RNA	Bacillus_subtilis_chromosome<>Bacillus_halodurans_chromosome<>Staphylococcus_aureus_N315_chromosome<>Staphylococcus_aureus_Mu50_chromosome<>Staphylococcus_aureus_COL_chromosome<>Staphylococcus_aureus_aureus_MRSA252_chromosome<>Staphylococcus_aureus_aureus_MSSA476_chromosome<>Listeria_monocytogenes_4b_F2365_chromosome<>Staphylococcus_epidermidis_RP62A_chromosome<>Clostridium_acetobutylicum_chromos…	NC_000964_SRP_bact(+)_+_(hom)|NC_002745_SRP_bact(+)_+_(hom)|NC_003210_SRP_bact(-)_-_(hom)|NC_002516_SRP_bact(+)_+_(hom)|NC_000913_ffs_SRP(+)_+_(hom)|NC_002505_SRP_bact(+)_+_(hom)|NC_003047_SRP_bact(+)_+_(hom)	0	-	SRP_bact_NC_000964|UD(5'(0-0)|3'(1-1)),SRP_bact_NC_003047|3'(0)	-	-	-
Bacillus_anthracis_str_Sterne	|	SAM_NC_005945	|	BAS0196		oligopeptide ABC transporter,	*	<<<	54	|	197004	197339	<<<	335	|	1	<<<	BAS0197	oxidoreductase, aldo/keto reductase family	*	SAM	1739	6.7e-73	T		5	RNA	Bacillus_cereus_ATCC_10987_chromosome<>Bacillus_cereus_ATCC14579_chromosome<>Bacillus_thuringiensis_konkukian_chromosome<>Bacillus_cereus_ZK_chromosome<>Bacillus_thuringiensis_Al_Hakam_chromosome	NC_003210_S_box6(-)_-_(hom)|NC_000964_S_box9(-)_-_(hom)|NC_003210_S_box3(-)_-_(hom)|NC_000964_S_box2(+)_+_(hom)|NC_000964_S_box11(+)_+_(hom)|NC_000964_S_box7(-)_-_(hom)|NC_002745_S_box4(-)_-_(hom)|NC_000964_S_box10(+)_+_(hom)|NC_002745_S_box3(-)_-_(hom)|NC_003210_S_box2(-)_-_(hom)|NC_000964_S_box1(-)_-_(hom)	10	Candidate_29_NC_005945(para),SAM_NC_005945(para),SAM_NC_005945(para),SAM_NC_005945(para),SAM_NC_005945(para),SAM_NC_005945(para),SAM_NC_005945(para),SAM_NC_005945(para),Candidate_118_NC_005945(para),SAM_NC_005945(para)	S_box2_NC_003210|UD(5'(1-1)|3'(0-0)),S_box4_NC_000964|UD(5'(1-1)|3'(0-0)),S_box5_NC_000964|UD(5'(1-1)|3'(0-1)),S_box9_NC_000964|UD(5'(1-1)|3'(0-0)),S_box4_NC_002745|3'(0),S_box1_NC_000964|3'(0),S_box2_NC_000964|3'(0),T1box2_NC_002745|3'(0),S_box3_NC_003210|3'(0),S_box7_NC_003210|3'(0),S_box2_NC_002745|3'(0)	-	RS	-B.subtilis_sigA_2(10.07|-234)
Bacillus_anthracis_str_Sterne	|	Purine_NC_005945	|	BAS0253		chaperonin GroEL	*	>>>	30	|	260544	260846	>>>	302	|	65	>>>	BAS0254	bifunctional GMP synthase/glutamine	*	Purine	1338	7.8e-55	T		6	RNA	Bacillus_cereus_ATCC_10987_chromosome<>Bacillus_cereus_ATCC14579_chromosome<>Bacillus_thuringiensis_konkukian_chromosome<>Bacillus_cereus_ZK_chromosome<>Bacillus_thuringiensis_Al_Hakam_chromosome<>Bacillus_cereus_cytotoxis_NVH_391-98_chromosome	NC_003210_Purine2(-)_-_(hom)	0	-	Purine2_NC_000964|UD(5'(0-0)|3'(0-0)),Purine1_NC_003210|3'(0),Purine2_NC_003210|3'(0),Purine4_NC_000964|3'(0),Purine_NC_002745|3'(0)	5	-	-
Bacillus_anthracis_str_Sterne	|	TPP_NC_005945	|	BAS0365		methyl-accepting chemotaxis protein	*	>>>	10	|	399281	399497	>>>	216	|	36	>>>	BAS0366	hypothetical protein	*	TPP	1161	1.3e-46	B		6	RNA	Bacillus_cereus_ATCC_10987_chromosome<>Bacillus_cereus_ATCC14579_chromosome<>Bacillus_thuringiensis_konkukian_chromosome<>Bacillus_cereus_ZK_chromosome<>Bacillus_thuringiensis_Al_Hakam_chromosome<>Bacillus_cereus_cytotoxis_NVH_391-98_chromosome	NC_000913_THI1(-)_-_(hom)|NC_000964_THI3(-)_-_(hom)|NC_000964_THI4(+)_+_(hom)|NC_003047_THI(+)_+_(hom)|NC_000964_THI1(+)_+_(hom)	3	TPP_NC_005945(para),TPP_NC_005945(para),TPP_NC_005945(para)	THI2_NC_000964|3'(0),THI1_NC_000964|3'(0),THI1_NC_002505|3'(0),THI2_NC_000913|3'(0),THI_NC_002516|3'(0),THI1_NC_003112|3'(0),THI_NC_005072|3'(0)	5	RS	-
Bacillus_anthracis_str_Sterne	|	ydaO-yuaA_NC_005945	|	BAS0702		hypothetical protein	*	<<<	299	|	761204	761502	>>>	298	|	246	>>>	BAS0703	potassium-transporting ATPase subunit A	*	ydaO-yuaA	1605	8.6e-67	B		3	RNA	Bacillus_cereus_ATCC_10987_chromosome<>Bacillus_cereus_ATCC14579_chromosome<>Bacillus_cereus_cytotoxis_NVH_391-98_chromosome	NC_000964_ydaO1yuaA1(+)_+_(hom)|NC_000964_ydaO1yuaA2(+)_+_(hom)	3	Candidate_240_NC_005945(tandem),Candidate_462_NC_005945(para),ydaO-yuaA_NC_005945(para)	ydaO1yuaA1_NC_000964|3'(0)	-	-	-
Bacillus_anthracis_str_Sterne	|	T-box_NC_005945	|	BAS1099		tryptophanyl-tRNA synthetase	*	<<<	49	|	1152352	1152613	<<<	261	|	86	<<<	BAS1100	hypothetical protein	*	T-box	524	2.7e-18	T		10	RNA	Bacillus_subtilis_chromosome<>Bacillus_cereus_ATCC_10987_chromosome<>Bacillus_cereus_ATCC14579_chromosome<>Bacillus_thuringiensis_konkukian_chromosome<>Bacillus_licheniformis_ATCC_14580_chromosome<>Bacillus_cereus_ZK_chromosome<>Bacillus_licheniformis_DSM_13_chromosome<>Bacillus_thuringiensis_Al_Hakam_chromosome<>Bacillus_cereus_cytotoxis_NVH_391-98_chromosome<>Bacillus_amyloliquefaciens_FZB42_ch…	NC_000964_T1box3(-)_-_(hom)|NC_002745_T1box1(+)_+_(hom)|NC_002745_T1box4(+)_+_(hom)|NC_000964_T1box5(+)_+_(hom)|NC_003210_T1box4(-)_-_(hom)|NC_000964_T1box8(-)_-_(hom)|NC_000964_T1box14(-)_-_(hom)|NC_003210_T1box1(+)_+_(hom)|NC_002745_T1box8(-)_-_(hom)|NC_000964_T1box6(+)_+_(hom)	10	Candidate_752_NC_005945(para),T-box_NC_005945(para),T-box_NC_005945(para),T-box_NC_005945(para),Candidate_658_NC_005945(para),T-box_NC_005945(para),T-box_NC_005945(para),T-box_NC_005945(para),T-box_NC_005945(para),T-box_NC_005945(para)	T1box3_NC_000964|UD(5'(1-1)|3'(0-0)),T1box12_NC_003210|UD(5'(1-1)|3'(0-0)),T1box4_NC_002745|UD(5'(0-0)|3'(0-0)),T1box7_NC_003210|UD(5'(0-1)|3'(0-0)),T1box5_NC_000964|UD(5'(0-0)|3'(0-0)),T1box8_NC_000964|UD(5'(1-1)|3'(0-0)),T1box4_NC_003210|UD(5'(1-1)|3'(0-0)),T1box10_NC_000964|UD(5'(0-0)|3'(1-1)),Lysine2_NC_002745|UD(5'(1-1)|3'(1-1)),T1box12_NC_000964|UD(5'(0-0)|3'(0-0)),T1box6_NC_003210|UD(5'(1-…	-	RS	-B.subtilis_sigA_1(10.48|-319)
Bacillus_anthracis_str_Sterne	|	T-box_NC_005945	|	BAS1155		hypothetical protein	*	>>>	1	|	1202718	1202803	>>>	85	|	307	>>>	BAS1156	anthranilate synthase component I	*	T-box	769	4e-29	T		6	RNA	Oceanobacillus_iheyensis_chromosome<>Bacillus_cereus_ATCC14579_chromosome<>Bacillus_thuringiensis_konkukian_chromosome<>Bacillus_cereus_ZK_chromosome<>Bacillus_thuringiensis_Al_Hakam_chromosome<>Bacillus_cereus_cytotoxis_NVH_391-98_chromosome	NC_003210_T1box8(-)_-_(hom)|NC_003210_T1box9(-)_-_(hom)	3	T-box_NC_005945(tandem),T-box_NC_005945(para),T-box_NC_005945(para)	T1box3_NC_000964|UD(5'(1-1)|3'(0-0)),T1box12_NC_003210|UD(5'(1-1)|3'(0-0)),T1box4_NC_002745|UD(5'(0-0)|3'(0-0)),T1box7_NC_003210|UD(5'(0-1)|3'(0-0)),T1box5_NC_000964|UD(5'(0-0)|3'(0-0)),T1box8_NC_000964|UD(5'(1-1)|3'(0-0)),T1box4_NC_003210|UD(5'(1-1)|3'(0-0)),T1box10_NC_000964|UD(5'(0-0)|3'(1-1)),Lysine2_NC_002745|UD(5'(1-1)|3'(1-1)),T1box12_NC_000964|UD(5'(0-0)|3'(0-0)),T1box6_NC_003210|UD(5'(1-…	-	-	-
Bacillus_anthracis_str_Sterne	|	T-box_NC_005945	|	BAS1155		hypothetical protein	*	>>>	96	|	1202813	1203095	>>>	282	|	15	>>>	BAS1156	anthranilate synthase component I	*	T-box	753	2.1e-28	T		6	RNA	Bacillus_cereus_ATCC_10987_chromosome<>Bacillus_cereus_ATCC14579_chromosome<>Bacillus_thuringiensis_konkukian_chromosome<>Bacillus_cereus_ZK_chromosome<>Bacillus_thuringiensis_Al_Hakam_chromosome<>Bacillus_cereus_cytotoxis_NVH_391-98_chromosome	NC_003210_T1box8(-)_-_(hom)|NC_003210_T1box9(-)_-_(hom)	3	T-box_NC_005945(tandem),T-box_NC_005945(para),T-box_NC_005945(para)	T1box3_NC_000964|UD(5'(1-1)|3'(0-0)),T1box12_NC_003210|UD(5'(1-1)|3'(0-0)),T1box4_NC_002745|UD(5'(0-0)|3'(0-0)),T1box7_NC_003210|UD(5'(0-1)|3'(0-0)),T1box5_NC_000964|UD(5'(0-0)|3'(0-0)),T1box8_NC_000964|UD(5'(1-1)|3'(0-0)),T1box4_NC_003210|UD(5'(1-1)|3'(0-0)),T1box10_NC_000964|UD(5'(0-0)|3'(1-1)),Lysine2_NC_002745|UD(5'(1-1)|3'(1-1)),T1box12_NC_000964|UD(5'(0-0)|3'(0-0)),T1box6_NC_003210|UD(5'(1-…	5	RS	-
Bacillus_anthracis_str_Sterne	|	T-box_NC_005945	|	BAS1337		precorrin-2 dehydrogenase	*	>>>	4	|	1369663	1369997	>>>	334	|	79	>>>	BAS1338	sodium-dependent transporter, putative	*	T-box	1584	6.2e-66	T		6	RNA	Bacillus_cereus_ATCC_10987_chromosome<>Bacillus_cereus_ATCC14579_chromosome<>Bacillus_thuringiensis_konkukian_chromosome<>Bacillus_cereus_ZK_chromosome<>Bacillus_thuringiensis_Al_Hakam_chromosome<>Bacillus_cereus_cytotoxis_NVH_391-98_chromosome	NC_003210_T1box11(-)_-_(hom)|NC_003210_T1box9(-)_-_(hom)|NC_003210_T1box7(-)_-_(hom)	4	T-box_NC_005945(para),T-box_NC_005945(para),Candidate_752_NC_005945(para),T-box_NC_005945(para)	T1box3_NC_000964|UD(5'(1-1)|3'(0-0)),T1box12_NC_003210|UD(5'(1-1)|3'(0-0)),T1box4_NC_002745|UD(5'(0-0)|3'(0-0)),T1box7_NC_003210|UD(5'(0-1)|3'(0-0)),T1box5_NC_000964|UD(5'(0-0)|3'(0-0)),T1box8_NC_000964|UD(5'(1-1)|3'(0-0)),T1box4_NC_003210|UD(5'(1-1)|3'(0-0)),T1box10_NC_000964|UD(5'(0-0)|3'(1-1)),Lysine2_NC_002745|UD(5'(1-1)|3'(1-1)),T1box12_NC_000964|UD(5'(0-0)|3'(0-0)),T1box6_NC_003210|UD(5'(1-…	5	RS	-B.subtilis_sigA_2(11.28|-295)
Bacillus_anthracis_str_Sterne	|	SAM_NC_005945	|	BAS1342		hypothetical protein	*	>>>	1	|	1375300	1375577	>>>	277	|	42	>>>	BAS1343	Na+/H+ antiporter family protein	*	SAM	1305	4e-53	B		4	RNA	Bacillus_cereus_ATCC14579_chromosome<>Bacillus_thuringiensis_konkukian_chromosome<>Bacillus_cereus_ZK_chromosome<>Bacillus_thuringiensis_Al_Hakam_chromosome	NC_000964_S_box11(+)_+_(hom)|NC_000964_S_box7(-)_-_(hom)|NC_000964_S_box9(-)_-_(hom)|NC_000964_S_box10(+)_+_(hom)|NC_003210_S_box3(-)_-_(hom)|NC_003210_S_box6(-)_-_(hom)|NC_000964_S_box2(+)_+_(hom)|NC_000964_S_box1(-)_-_(hom)|NC_002745_S_box4(-)_-_(hom)|NC_003210_S_box4(+)_+_(hom)|NC_003210_S_box2(-)_-_(hom)	7	Candidate_29_NC_005945(para),SAM_NC_005945(para),SAM_NC_005945(para),Candidate_105_NC_005945(para),SAM_NC_005945(para),SAM_NC_005945(para),SAM_NC_005945(para)	S_box2_NC_003210|UD(5'(1-1)|3'(0-0)),S_box4_NC_000964|UD(5'(1-1)|3'(0-0)),S_box5_NC_000964|UD(5'(1-1)|3'(0-1)),S_box9_NC_000964|UD(5'(1-1)|3'(0-0)),S_box4_NC_002745|3'(0),S_box1_NC_000964|3'(0),S_box2_NC_000964|3'(0),T1box2_NC_002745|3'(0),S_box3_NC_003210|3'(0),S_box7_NC_003210|3'(0),S_box2_NC_002745|3'(0)	5	RS	-B.subtilis_sigA_2(9.27|-196)
Bacillus_anthracis_str_Sterne	|	Purine_NC_005945	|	BAS1474		methionine aminopeptidase	*	>>>	141	|	1497670	1497829	>>>	159	|	24	>>>	BAS1475	xanthine phosphoribosyltransferase	*	Purine	915	2.3e-35	T		6	RNA	Bacillus_cereus_ATCC_10987_chromosome<>Bacillus_cereus_ATCC14579_chromosome<>Bacillus_thuringiensis_konkukian_chromosome<>Bacillus_cereus_ZK_chromosome<>Bacillus_thuringiensis_Al_Hakam_chromosome<>Bacillus_cereus_cytotoxis_NVH_391-98_chromosome	NC_000964_Purine4(-)_-_(hom)|NC_002745_Purine(+)_+_(hom)|NC_000964_Purine3(+)_+_(hom)|NC_003210_Purine2(-)_-_(hom)	1	Purine_NC_005945(para)	Purine2_NC_000964|UD(5'(0-0)|3'(0-0)),Purine1_NC_003210|3'(0),Purine2_NC_003210|3'(0),Purine4_NC_000964|3'(0),Purine_NC_002745|3'(0)	5	RS	-B.subtilis_sigA_1(9.26|-193)B.subtilis_sigA_2(10.32|-193)
Bacillus_anthracis_str_Sterne	|	ykoK_NC_005945	|	BAS1487		hypothetical protein	*	>>>	146	|	1510437	1510716	>>>	279	|	266	>>>	BAS1488	cation transporter, putative	*	ykoK	474	9.8e-16	T		18	RNA	Bacillus_subtilis_chromosome<>Bacillus_halodurans_chromosome<>Clostridium_acetobutylicum_chromosome<>Listeria_innocua_chromosome<>Bacillus_cereus_ATCC_10987_chromosome<>Bacillus_cereus_ATCC14579_chromosome<>Bacillus_thuringiensis_konkukian_chromosome<>Bacillus_licheniformis_ATCC_14580_chromosome<>Bacillus_cereus_ZK_chromosome<>Bacillus_licheniformis_DSM_13_chromosome<>Bacillus_clausii_KSM-K16_chr…	NC_000964_ykoK(+)_+_(hom)|NC_003210_ykoK(-)_-_(hom)|NC_002505_ykoK(+)_+_(hom)	0	Candidate_136_NC_005945(anti)	-	-	-	-
Bacillus_anthracis_str_Sterne	|	T-box_NC_005945	|	BAS1672		hypothetical protein	*	>>>	341	|	1692424	1692495	>>>	71	|	47	>>>	BAS1673	asparagine synthetase AsnA	*	T-box	201	4.2e-17	T		10	RNA	Bacillus_cereus_ATCC_10987_chromosome<>Bacillus_cereus_ZK_chromosome<>Bacillus_thuringiensis_Al_Hakam_chromosome<>Clostridium_difficile_630_chromosome<>Clostridium_botulinum_A_chromosome<>Alkaliphilus_metalliredigens_QYMF_chromosome<>Bacillus_cereus_cytotoxis_NVH_391-98_chromosome<>Clostridium_botulinum_A_ATCC_19397_chromosome<>Clostridium_botulinum_A_Hall_chromosome<>Clostridium_botulinum_F_Lang…	NC_000964_T1box2(+)_+_(hom)|NC_000964_T1box14(-)_-_(hom)|NC_003210_T1box5(-)_-_(hom)|NC_002745_T1box3(+)_+_(hom)|NC_000964_T1box5(+)_+_(hom)	3	Candidate_74_NC_005945(para),T-box_NC_005945(para),T-box_NC_005945(para)	T1box3_NC_000964|UD(5'(1-1)|3'(0-0)),T1box12_NC_003210|UD(5'(1-1)|3'(0-0)),T1box4_NC_002745|UD(5'(0-0)|3'(0-0)),T1box7_NC_003210|UD(5'(0-1)|3'(0-0)),T1box5_NC_000964|UD(5'(0-0)|3'(0-0)),T1box8_NC_000964|UD(5'(1-1)|3'(0-0)),T1box4_NC_003210|UD(5'(1-1)|3'(0-0)),T1box10_NC_000964|UD(5'(0-0)|3'(1-1)),Lysine2_NC_002745|UD(5'(1-1)|3'(1-1)),T1box12_NC_000964|UD(5'(0-0)|3'(0-0)),T1box6_NC_003210|UD(5'(1-…	5	RS	-
Bacillus_anthracis_str_Sterne	|	ydaO-yuaA_NC_005945	|	BAS1746		2-dehydropantoate 2-reductase	*	>>>	216	|	1768062	1768383	>>>	321	|	74	>>>	BAS1747	hypothetical protein	*	ydaO-yuaA	1816	2.2e-76	T		1	RNA	Bacillus_cereus_ATCC_10987_chromosome	NC_000964_ydaO1yuaA1(+)_+_(hom)|NC_000964_ydaO1yuaA2(+)_+_(hom)|NC_000964_Purine5(+)_+_(hom|rev)	1	ydaO-yuaA_NC_005945(para)	ydaO1yuaA1_NC_000964|3'(0)	5	RS	-B.subtilis_sigA_3(10.17|-423)
Bacillus_anthracis_str_Sterne	|	T-box_NC_005945	|	BAS1824		hypothetical protein	*	>>>	220	|	1849963	1850226	>>>	263	|	479	>>>	BAS1825	homoserine dehydrogenase	*	T-box	536	1.8e-18	T		11	RNA	Bacillus_subtilis_chromosome<>Bacillus_halodurans_chromosome<>Bacillus_cereus_ATCC_10987_chromosome<>Bacillus_cereus_ATCC14579_chromosome<>Bacillus_thuringiensis_konkukian_chromosome<>Bacillus_cereus_ZK_chromosome<>Geobacillus_kaustophilus_HTA426_chromosome<>Bacillus_clausii_KSM-K16_chromosome<>Bacillus_thuringiensis_Al_Hakam_chromosome<>Geobacillus_thermodenitrificans_NG80-2_chromosome<>Bacillus…	NC_000964_T1box15(-)_-_(hom)|NC_000964_T1box16(-)_-_(hom)|NC_000964_T1box17(-)_-_(hom)|NC_000964_T1box12(-)_-_(hom)|NC_003210_T1box6(-)_-_(hom)	3	T-box_NC_005945(tandem),T-box_NC_005945(para),T-box_NC_005945(para)	T1box3_NC_000964|UD(5'(1-1)|3'(0-0)),T1box12_NC_003210|UD(5'(1-1)|3'(0-0)),T1box4_NC_002745|UD(5'(0-0)|3'(0-0)),T1box7_NC_003210|UD(5'(0-1)|3'(0-0)),T1box5_NC_000964|UD(5'(0-0)|3'(0-0)),T1box8_NC_000964|UD(5'(1-1)|3'(0-0)),T1box4_NC_003210|UD(5'(1-1)|3'(0-0)),T1box10_NC_000964|UD(5'(0-0)|3'(1-1)),Lysine2_NC_002745|UD(5'(1-1)|3'(1-1)),T1box12_NC_000964|UD(5'(0-0)|3'(0-0)),T1box6_NC_003210|UD(5'(1-…	-	-	-B.subtilis_sigA_2(10.06|-274)
Bacillus_anthracis_str_Sterne	|	T-box_NC_005945	|	BAS2059		hypothetical protein	*	>>>	102	|	2069015	2069316	>>>	301	|	90	>>>	BAS2060	sodium-dependent transporter, putative	*	T-box	490	1.1e-16	T		8	RNA	Bacillus_cereus_ATCC_10987_chromosome<>Bacillus_cereus_ATCC14579_chromosome<>Bacillus_thuringiensis_konkukian_chromosome<>Bacillus_licheniformis_ATCC_14580_chromosome<>Bacillus_cereus_ZK_chromosome<>Bacillus_licheniformis_DSM_13_chromosome<>Bacillus_thuringiensis_Al_Hakam_chromosome<>Bacillus_cereus_cytotoxis_NVH_391-98_chromosome	NC_003210_T1box14(-)_-_(hom)|NC_000964_T1box11(-)_-_(hom)|NC_003210_T1box11(-)_-_(hom)|NC_002745_T1box2(-)_-_(hom)|NC_000964_T1box13(-)_-_(hom)|NC_003210_T1box13(+)_+_(hom)	3	Candidate_658_NC_005945(para),T-box_NC_005945(para),Candidate_423_NC_005945(para)	T1box3_NC_000964|UD(5'(1-1)|3'(0-0)),T1box12_NC_003210|UD(5'(1-1)|3'(0-0)),T1box4_NC_002745|UD(5'(0-0)|3'(0-0)),T1box7_NC_003210|UD(5'(0-1)|3'(0-0)),T1box5_NC_000964|UD(5'(0-0)|3'(0-0)),T1box8_NC_000964|UD(5'(1-1)|3'(0-0)),T1box4_NC_003210|UD(5'(1-1)|3'(0-0)),T1box10_NC_000964|UD(5'(0-0)|3'(1-1)),Lysine2_NC_002745|UD(5'(1-1)|3'(1-1)),T1box12_NC_000964|UD(5'(0-0)|3'(0-0)),T1box6_NC_003210|UD(5'(1-…	-	RS	-B.subtilis_sigG_2(8.23|-377)B.subtilis_sigA_2(10.77|-310)
Bacillus_anthracis_str_Sterne	|	Glycine_NC_005945	|	BAS2217		sodium/alanine symporter family protein	*	<<<	25	|	2221520	2221938	<<<	418	|	0	<<<	BAS2218	hypothetical protein	*	Glycine	2211	2.8e-94	T		4	RNA	Bacillus_cereus_ATCC14579_chromosome<>Bacillus_thuringiensis_konkukian_chromosome<>Bacillus_cereus_ZK_chromosome<>Bacillus_thuringiensis_Al_Hakam_chromosome	NC_002505_gcvT1(-)_-_(hom)	0	-	gcvT1_NC_002505|3'(0),gcvT2_NC_002505|3'(0)	5	-	-B.subtilis_sigG_2(8.56|-344)B.subtilis_sigA_2(10.28|-360)
Bacillus_anthracis_str_Sterne	|	TPP_NC_005945	|	BAS2435		D-alanylalanine synthetase	*	>>>	22	|	2433593	2433807	>>>	214	|	64	>>>	BAS2436	transcriptional activator TenA	*	TPP	486	3.2e-16	T		6	RNA	Bacillus_cereus_ATCC_10987_chromosome<>Bacillus_cereus_ATCC14579_chromosome<>Bacillus_thuringiensis_konkukian_chromosome<>Bacillus_cereus_ZK_chromosome<>Bacillus_thuringiensis_Al_Hakam_chromosome<>Bacillus_cereus_cytotoxis_NVH_391-98_chromosome	NC_000964_THI2(+)_+_(hom)|NC_000964_THI1(+)_+_(hom)|NC_003210_THI1(+)_+_(hom)|NC_000964_THI4(+)_+_(hom)|NC_000913_THI1(-)_-_(hom)	3	TPP_NC_005945(para),TPP_NC_005945(para),TPP_NC_005945(para)	THI2_NC_000964|3'(0),THI1_NC_000964|3'(0),THI1_NC_002505|3'(0),THI2_NC_000913|3'(0),THI_NC_002516|3'(0),THI1_NC_003112|3'(0),THI_NC_005072|3'(0)	5	RS	-B.subtilis_sigK_3(10.07|-177)B.subtilis_sigG_3(9.39|-169)B.subtilis_sigA_1(10.93|-187)
Bacillus_anthracis_str_Sterne	|	T-box_NC_005945	|	BAS2467		penicillin-binding protein	*	>>>	187	|	2469753	2470062	>>>	309	|	37	>>>	BAS2468	permease, putative	*	T-box	774	1.9e-29	T		6	RNA	Bacillus_cereus_ATCC_10987_chromosome<>Bacillus_cereus_ATCC14579_chromosome<>Bacillus_thuringiensis_konkukian_chromosome<>Bacillus_cereus_ZK_chromosome<>Bacillus_clausii_KSM-K16_chromosome<>Bacillus_thuringiensis_Al_Hakam_chromosome	NC_000964_T1box9(-)_-_(hom)|NC_003210_T1box5(-)_-_(hom)|NC_003210_T1box12(+)_+_(hom)|NC_003210_T1box8(-)_-_(hom)|NC_003210_T1box13(+)_+_(hom)|NC_000964_T1box7(-)_-_(hom)	3	T-box_NC_005945(para),Candidate_580_NC_005945(para),Candidate_658_NC_005945(para)	T1box3_NC_000964|UD(5'(1-1)|3'(0-0)),T1box12_NC_003210|UD(5'(1-1)|3'(0-0)),T1box4_NC_002745|UD(5'(0-0)|3'(0-0)),T1box7_NC_003210|UD(5'(0-1)|3'(0-0)),T1box5_NC_000964|UD(5'(0-0)|3'(0-0)),T1box8_NC_000964|UD(5'(1-1)|3'(0-0)),T1box4_NC_003210|UD(5'(1-1)|3'(0-0)),T1box10_NC_000964|UD(5'(0-0)|3'(1-1)),Lysine2_NC_002745|UD(5'(1-1)|3'(1-1)),T1box12_NC_000964|UD(5'(0-0)|3'(0-0)),T1box6_NC_003210|UD(5'(1-…	5	RS	-
Bacillus_anthracis_str_Sterne	|	SAM_NC_005945	|	BAS2981		peptidase, M20/M25/M40 family	*	<<<	26	|	2953757	2953995	<<<	238	|	0	<<<	BAS2982	hypothetical protein	*	SAM	1012	6.6e-40	B		6	RNA	Bacillus_cereus_ATCC_10987_chromosome<>Bacillus_cereus_ATCC14579_chromosome<>Bacillus_thuringiensis_konkukian_chromosome<>Bacillus_cereus_ZK_chromosome<>Bacillus_thuringiensis_Al_Hakam_chromosome<>Bacillus_cereus_cytotoxis_NVH_391-98_chromosome	NC_000964_S_box7(-)_-_(hom)|NC_003210_S_box3(-)_-_(hom)|NC_000964_S_box2(+)_+_(hom)|NC_000964_S_box10(+)_+_(hom)|NC_000964_S_box9(-)_-_(hom)|NC_003210_S_box6(-)_-_(hom)|NC_002745_S_box3(-)_-_(hom)|NC_000964_S_box11(+)_+_(hom)|NC_002745_S_box4(-)_-_(hom)|NC_000964_S_box1(-)_-_(hom)|NC_000964_S_box8(-)_-_(hom)|NC_003210_S_box2(-)_-_(hom)	10	Candidate_29_NC_005945(anti),SAM_NC_005945(para),SAM_NC_005945(para),Candidate_105_NC_005945(para),SAM_NC_005945(para),SAM_NC_005945(para),SAM_NC_005945(para),SAM_NC_005945(para),SAM_NC_005945(para),Candidate_118_NC_005945(para),SAM_NC_005945(para)	S_box2_NC_003210|UD(5'(1-1)|3'(0-0)),S_box4_NC_000964|UD(5'(1-1)|3'(0-0)),S_box5_NC_000964|UD(5'(1-1)|3'(0-1)),S_box9_NC_000964|UD(5'(1-1)|3'(0-0)),S_box4_NC_002745|3'(0),S_box1_NC_000964|3'(0),S_box2_NC_000964|3'(0),T1box2_NC_002745|3'(0),S_box3_NC_003210|3'(0),S_box7_NC_003210|3'(0),S_box2_NC_002745|3'(0)	5	RS	-B.subtilis_sigA_2(10.05|-193)
Bacillus_anthracis_str_Sterne	|	T-box_NC_005945	|	BAS3746		isoleucyl-tRNA synthetase	*	<<<	48	|	3716794	3717092	<<<	298	|	0	<<<	BAS3747	cell-division initiation protein DivIVA	*	T-box	1453	6.3e-60	T		6	RNA	Bacillus_cereus_ATCC_10987_chromosome<>Bacillus_cereus_ATCC14579_chromosome<>Bacillus_thuringiensis_konkukian_chromosome<>Bacillus_cereus_ZK_chromosome<>Bacillus_thuringiensis_Al_Hakam_chromosome<>Bacillus_cereus_cytotoxis_NVH_391-98_chromosome	NC_000964_T1box5(+)_+_(hom)|NC_003210_T1box1(+)_+_(hom)|NC_003210_T1box4(-)_-_(hom)|NC_000964_T1box14(-)_-_(hom)|NC_000964_T1box10(-)_-_(hom)|NC_002745_T1box7(-)_-_(hom)|NC_000964_T1box7(-)_-_(hom)|NC_000964_T1box18(+)_+_(hom)|NC_000964_T1box13(-)_-_(hom)|NC_002745_T1box8(-)_-_(hom)|NC_003210_T1box13(+)_+_(hom)	10	T-box_NC_005945(para),T-box_NC_005945(para),T-box_NC_005945(para),T-box_NC_005945(para),T-box_NC_005945(para),T-box_NC_005945(para),T-box_NC_005945(para),T-box_NC_005945(para),T-box_NC_005945(para),Candidate_658_NC_005945(para)	T1box3_NC_000964|UD(5'(1-1)|3'(0-0)),T1box12_NC_003210|UD(5'(1-1)|3'(0-0)),T1box4_NC_002745|UD(5'(0-0)|3'(0-0)),T1box7_NC_003210|UD(5'(0-1)|3'(0-0)),T1box5_NC_000964|UD(5'(0-0)|3'(0-0)),T1box8_NC_000964|UD(5'(1-1)|3'(0-0)),T1box4_NC_003210|UD(5'(1-1)|3'(0-0)),T1box10_NC_000964|UD(5'(0-0)|3'(1-1)),Lysine2_NC_002745|UD(5'(1-1)|3'(1-1)),T1box12_NC_000964|UD(5'(0-0)|3'(0-0)),T1box6_NC_003210|UD(5'(1-…	-	RS	-B.subtilis_sigA_2(10.84|-268)
Bacillus_anthracis_str_Sterne	|	SAM_NC_005945	|	BAS3943		5-methylthioribose kinase, putative	*	<<<	42	|	3891049	3891152	<<<	103	|	158	<<<	BAS3944	hydrolase, carbon-nitrogen family	*	SAM	275	6.3e-19	B		7	RNA	Bacillus_subtilis_chromosome<>Bacillus_cereus_ATCC14579_chromosome<>Bacillus_thuringiensis_konkukian_chromosome<>Bacillus_cereus_ZK_chromosome<>Bacillus_thuringiensis_Al_Hakam_chromosome<>Geobacillus_thermodenitrificans_NG80-2_chromosome<>Bacillus_cereus_cytotoxis_NVH_391-98_chromosome	NC_000964_S_box4(-)_-_(hom)|NC_000964_S_box8(-)_-_(hom)|NC_003210_S_box2(-)_-_(hom)|NC_003210_S_box3(-)_-_(hom)	2	Candidate_66_NC_005945(para),SAM_NC_005945(para)	S_box2_NC_003210|UD(5'(1-1)|3'(0-0)),S_box4_NC_000964|UD(5'(1-1)|3'(0-0)),S_box5_NC_000964|UD(5'(1-1)|3'(0-1)),S_box9_NC_000964|UD(5'(1-1)|3'(0-0)),S_box4_NC_002745|3'(0),S_box1_NC_000964|3'(0),S_box2_NC_000964|3'(0),T1box2_NC_002745|3'(0),S_box3_NC_003210|3'(0),S_box7_NC_003210|3'(0),S_box2_NC_002745|3'(0)	-	RS	-B.subtilis_sigG_1(8.05|-195)B.subtilis_sigA_3(10.32|-228)
Bacillus_anthracis_str_Sterne	|	SAM_NC_005945	|	BAS3945		hypothetical protein	*	>>>	16	|	3893383	3893579	>>>	196	|	23	>>>	BAS3946	ribulose bisphosphate carboxylase, putative	*	SAM	943	1.1e-36	T		6	RNA	Bacillus_cereus_ATCC_10987_chromosome<>Bacillus_cereus_ATCC14579_chromosome<>Bacillus_thuringiensis_konkukian_chromosome<>Bacillus_cereus_ZK_chromosome<>Bacillus_thuringiensis_Al_Hakam_chromosome<>Bacillus_cereus_cytotoxis_NVH_391-98_chromosome	NC_000964_S_box5(+)_+_(hom)|NC_000964_S_box11(+)_+_(hom)|NC_000964_S_box9(-)_-_(hom)|NC_000964_S_box10(+)_+_(hom)|NC_003210_S_box6(-)_-_(hom)|NC_003210_S_box3(-)_-_(hom)|NC_002745_S_box2(+)_+_(hom)|NC_003210_S_box1(+)_+_(hom)|NC_000964_S_box7(-)_-_(hom)|NC_000964_S_box1(-)_-_(hom)	8	SAM_NC_005945(para),SAM_NC_005945(para),SAM_NC_005945(para),Candidate_105_NC_005945(para),SAM_NC_005945(para),SAM_NC_005945(para),SAM_NC_005945(para),SAM_NC_005945(para)	S_box2_NC_003210|UD(5'(1-1)|3'(0-0)),S_box4_NC_000964|UD(5'(1-1)|3'(0-0)),S_box5_NC_000964|UD(5'(1-1)|3'(0-1)),S_box9_NC_000964|UD(5'(1-1)|3'(0-0)),S_box4_NC_002745|3'(0),S_box1_NC_000964|3'(0),S_box2_NC_000964|3'(0),T1box2_NC_002745|3'(0),S_box3_NC_003210|3'(0),S_box7_NC_003210|3'(0),S_box2_NC_002745|3'(0)	5	RS	-
Bacillus_anthracis_str_Sterne	|	T-box_NC_005945	|	BAS4298		histidyl-tRNA synthetase	*	<<<	41	|	4211180	4211443	<<<	263	|	49	<<<	BAS4300	hypothetical protein	*	T-box	498	7.7e-17	T		9	RNA	Bacillus_subtilis_chromosome<>Bacillus_halodurans_chromosome<>Bacillus_cereus_ATCC_10987_chromosome<>Bacillus_cereus_ATCC14579_chromosome<>Bacillus_thuringiensis_konkukian_chromosome<>Bacillus_cereus_ZK_chromosome<>Geobacillus_kaustophilus_HTA426_chromosome<>Geobacillus_thermodenitrificans_NG80-2_chromosome<>Bacillus_cereus_cytotoxis_NVH_391-98_chromosome	NC_000964_T1box9(-)_-_(hom)|NC_003210_T1box4(-)_-_(hom)|NC_000964_T1box13(-)_-_(hom)|NC_003210_T1box12(+)_+_(hom)|NC_000964_T1box7(-)_-_(hom)|NC_000964_T1box14(-)_-_(hom)	4	T-box_NC_005945(para),T-box_NC_005945(para),T-box_NC_005945(para),T-box_NC_005945(para)	T1box3_NC_000964|UD(5'(1-1)|3'(0-0)),T1box12_NC_003210|UD(5'(1-1)|3'(0-0)),T1box4_NC_002745|UD(5'(0-0)|3'(0-0)),T1box7_NC_003210|UD(5'(0-1)|3'(0-0)),T1box5_NC_000964|UD(5'(0-0)|3'(0-0)),T1box8_NC_000964|UD(5'(1-1)|3'(0-0)),T1box4_NC_003210|UD(5'(1-1)|3'(0-0)),T1box10_NC_000964|UD(5'(0-0)|3'(1-1)),Lysine2_NC_002745|UD(5'(1-1)|3'(1-1)),T1box12_NC_000964|UD(5'(0-0)|3'(0-0)),T1box6_NC_003210|UD(5'(1-…	-	RS	-B.subtilis_sigA_2(10.32|-279)
Bacillus_anthracis_str_Sterne	|	T-box_NC_005945	|	BAS4355		valyl-tRNA synthetase	*	<<<	19	|	4266672	4266952	<<<	280	|	95	<<<	BAS4356	hypothetical protein	*	T-box	474	7.5e-16	B		7	RNA	Bacillus_cereus_ATCC_10987_chromosome<>Bacillus_cereus_ATCC14579_chromosome<>Bacillus_thuringiensis_konkukian_chromosome<>Bacillus_cereus_ZK_chromosome<>Geobacillus_kaustophilus_HTA426_chromosome<>Bacillus_thuringiensis_Al_Hakam_chromosome<>Bacillus_cereus_cytotoxis_NVH_391-98_chromosome	NC_000964_T1box13(-)_-_(hom)|NC_003210_T1box5(-)_-_(hom)|NC_003210_T1box1(+)_+_(hom)|NC_000964_T1box5(+)_+_(hom)|NC_002745_T1box4(+)_+_(hom)|NC_002745_T1box7(-)_-_(hom)|NC_000964_T1box2(+)_+_(hom)|NC_000964_T1box10(-)_-_(hom)|NC_002745_T1box1(+)_+_(hom)|NC_002745_T1box2(-)_-_(hom)	7	T-box_NC_005945(para),T-box_NC_005945(para),T-box_NC_005945(para),T-box_NC_005945(para),T-box_NC_005945(para),T-box_NC_005945(para),Candidate_658_NC_005945(para)	T1box3_NC_000964|UD(5'(1-1)|3'(0-0)),T1box12_NC_003210|UD(5'(1-1)|3'(0-0)),T1box4_NC_002745|UD(5'(0-0)|3'(0-0)),T1box7_NC_003210|UD(5'(0-1)|3'(0-0)),T1box5_NC_000964|UD(5'(0-0)|3'(0-0)),T1box8_NC_000964|UD(5'(1-1)|3'(0-0)),T1box4_NC_003210|UD(5'(1-1)|3'(0-0)),T1box10_NC_000964|UD(5'(0-0)|3'(1-1)),Lysine2_NC_002745|UD(5'(1-1)|3'(1-1)),T1box12_NC_000964|UD(5'(0-0)|3'(0-0)),T1box6_NC_003210|UD(5'(1-…	5	RS	-
Bacillus_anthracis_str_Sterne	|	T-box_NC_005945	|	BAS4454		asparaginyl-tRNA synthetase	*	<<<	35	|	4366562	4366862	<<<	300	|	162	<<<	BAS4455	phenylalanyl-tRNA synthetase beta subunit	*	T-box	563	6.6e-20	T		14	RNA	Bacillus_cereus_ATCC_10987_chromosome<>Clostridium_tetani_E88_chromosome<>Bacillus_cereus_ATCC14579_chromosome<>Bacillus_thuringiensis_konkukian_chromosome<>Bacillus_cereus_ZK_chromosome<>Pediococcus_pentosaceus_ATCC_25745_chromosome<>Bacillus_thuringiensis_Al_Hakam_chromosome<>Clostridium_botulinum_A_chromosome<>Alkaliphilus_metalliredigens_QYMF_chromosome<>Bacillus_cereus_cytotoxis_NVH_391-98_c…	NC_000964_T1box5(+)_+_(hom)|NC_000964_T1box18(+)_+_(hom)|NC_002745_T1box7(-)_-_(hom)|NC_003210_T1box5(-)_-_(hom)|NC_000964_T1box6(+)_+_(hom)|NC_000964_T1box13(-)_-_(hom)|NC_003210_T1box3(-)_-_(hom)|NC_002745_T1box2(-)_-_(hom)	9	Candidate_74_NC_005945(anti),T-box_NC_005945(para),Candidate_630_NC_005945(para),Candidate_775_NC_005945(para),Candidate_585_NC_005945(para),Candidate_795_NC_005945(para),Candidate_568_NC_005945(para),T-box_NC_005945(para),Candidate_672_NC_005945(para),T-box_NC_005945(para)	T1box3_NC_000964|UD(5'(1-1)|3'(0-0)),T1box12_NC_003210|UD(5'(1-1)|3'(0-0)),T1box4_NC_002745|UD(5'(0-0)|3'(0-0)),T1box7_NC_003210|UD(5'(0-1)|3'(0-0)),T1box5_NC_000964|UD(5'(0-0)|3'(0-0)),T1box8_NC_000964|UD(5'(1-1)|3'(0-0)),T1box4_NC_003210|UD(5'(1-1)|3'(0-0)),T1box10_NC_000964|UD(5'(0-0)|3'(1-1)),Lysine2_NC_002745|UD(5'(1-1)|3'(1-1)),T1box12_NC_000964|UD(5'(0-0)|3'(0-0)),T1box6_NC_003210|UD(5'(1-…	-	RS	-
Bacillus_anthracis_str_Sterne	|	SAM_NC_005945	|	BAS4855		ABC transporter, ATP-binding protein	*	<<<	233	|	4741140	4741406	<<<	266	|	31	<<<	BAS4856	hypothetical protein	*	SAM	418	1.8e-17	T		7	RNA	Bacillus_halodurans_chromosome<>Bacillus_cereus_ATCC_10987_chromosome<>Bacillus_cereus_ATCC14579_chromosome<>Bacillus_thuringiensis_konkukian_chromosome<>Bacillus_thuringiensis_Al_Hakam_chromosome<>Bacillus_cereus_cytotoxis_NVH_391-98_chromosome<>Bacillus_amyloliquefaciens_FZB42_chromosome	NC_000964_S_box9(-)_-_(hom)|NC_000964_S_box11(+)_+_(hom)|NC_003210_S_box2(-)_-_(hom)|NC_002745_S_box2(+)_+_(hom)|NC_000964_S_box6(+)_+_(hom)|NC_000964_S_box2(+)_+_(hom)|NC_000964_S_box10(+)_+_(hom)|NC_002745_S_box3(-)_-_(hom)|NC_003210_S_box3(-)_-_(hom)|NC_000964_S_box5(+)_+_(hom)|NC_003210_S_box1(+)_+_(hom)|NC_002745_S_box4(-)_-_(hom)|NC_000964_S_box7(-)_-_(hom)|NC_000964_S_box3(-)_-_(hom)	7	SAM_NC_005945(para),Candidate_29_NC_005945(para),SAM_NC_005945(para),Candidate_118_NC_005945(para),SAM_NC_005945(para),SAM_NC_005945(para),SAM_NC_005945(para)	S_box2_NC_003210|UD(5'(1-1)|3'(0-0)),S_box4_NC_000964|UD(5'(1-1)|3'(0-0)),S_box5_NC_000964|UD(5'(1-1)|3'(0-1)),S_box9_NC_000964|UD(5'(1-1)|3'(0-0)),S_box4_NC_002745|3'(0),S_box1_NC_000964|3'(0),S_box2_NC_000964|3'(0),T1box2_NC_002745|3'(0),S_box3_NC_003210|3'(0),S_box7_NC_003210|3'(0),S_box2_NC_002745|3'(0)	-	-	-B.subtilis_sigA_2(11.58|-235)
Bacillus_anthracis_str_Sterne	|	tmRNA_NC_005945	|	BAS4954		DNA-binding response regulator	*	<<<	329	|	4835640	4835982	<<<	342	|	216	<<<	BAS4955	SsrA-binding protein	*	tmRNA	654	3.2e-24	T		9	RNA	Bacillus_subtilis_chromosome<>Oceanobacillus_iheyensis_chromosome<>Bacillus_licheniformis_ATCC_14580_chromosome<>Bacillus_licheniformis_DSM_13_chromosome<>Geobacillus_kaustophilus_HTA426_chromosome<>Staphylococcus_haemolyticus_chromosome<>Syntrophus_aciditrophicus_SB_chromosome<>Lactobacillus_reuteri_F275_chromosome<>Bacillus_amyloliquefaciens_FZB42_chromosome	NC_003210_tmRNA(-)_-_(hom)|NC_000964_tmRNA(-)_-_(hom)|NC_002745_tmRNA(+)_+_(hom)|NC_002516_tmRNA(-)_-_(hom)	0	-	-	-	-	-
Bacillus_anthracis_str_Sterne	|	tmRNA_NC_005945	|	BAS4954		DNA-binding response regulator	*	<<<	386	|	4835697	4835982	<<<	285	|	216	<<<	BAS4955	SsrA-binding protein	*	tmRNA	654	3.2e-24	B		17	RNA	Bacillus_subtilis_chromosome<>Bacillus_halodurans_chromosome<>Listeria_monocytogenes_4b_F2365_chromosome<>Listeria_monocytogenes_chromosome<>Listeria_innocua_chromosome<>Oceanobacillus_iheyensis_chromosome<>Enterococcus_faecalis_V583_chromosome<>Bacillus_licheniformis_ATCC_14580_chromosome<>Bacillus_licheniformis_DSM_13_chromosome<>Geobacillus_kaustophilus_HTA426_chromosome<>Bacillus_clausii_KSM-…	NC_003210_tmRNA(-)_-_(hom)|NC_000964_tmRNA(-)_-_(hom)|NC_002745_tmRNA(+)_+_(hom)|NC_002516_tmRNA(-)_-_(hom)	0	-	-	-	-	-
Bacillus_anthracis_str_Sterne	|	TPP_NC_005945	|	BAS5076		thiamine biosynthesis protein ThiC	*	<<<	58	|	4954670	4954901	<<<	231	|	9	<<<	BAS5077	L-lactate permease	*	TPP	1048	8.5e-42	T		6	RNA	Bacillus_cereus_ATCC_10987_chromosome<>Bacillus_cereus_ATCC14579_chromosome<>Bacillus_thuringiensis_konkukian_chromosome<>Bacillus_cereus_ZK_chromosome<>Bacillus_thuringiensis_Al_Hakam_chromosome<>Bacillus_cereus_cytotoxis_NVH_391-98_chromosome	NC_000964_THI1(+)_+_(hom)|NC_000964_THI2(+)_+_(hom)|NC_000964_THI4(+)_+_(hom)|NC_003210_THI1(+)_+_(hom)|NC_000913_THI1(-)_-_(hom)	3	TPP_NC_005945(para),TPP_NC_005945(para),TPP_NC_005945(para)	THI2_NC_000964|3'(0),THI1_NC_000964|3'(0),THI1_NC_002505|3'(0),THI2_NC_000913|3'(0),THI_NC_002516|3'(0),THI1_NC_003112|3'(0),THI_NC_005072|3'(0)	-	RS	-
Bacillus_anthracis_str_Sterne	|	yybP-ykoY_NC_005945	|	BAS1223		hypothetical protein	*	<<<	104	|	1269091	1269274	<<<	183	|	0	<<<	BAS1224	potassium uptake protein, TrkH family	*	yybP-ykoY	1106	3.4e-44	Z		6	RNA	Bacillus_cereus_ATCC_10987_chromosome<>Bacillus_cereus_ATCC14579_chromosome<>Bacillus_thuringiensis_konkukian_chromosome<>Bacillus_cereus_ZK_chromosome<>Bacillus_thuringiensis_Al_Hakam_chromosome<>Bacillus_cereus_cytotoxis_NVH_391-98_chromosome	NC_003210_yybP1ykoY(+)_+_(hom)	0	-	yybP1ykoY_NC_003210|3'(0),yybP1ykoY1_NC_000964|3'(0),yybP1ykoY_NC_002745|3'(0)	-	-	-B.subtilis_sigA_2(12.5|-159)
Bacillus_anthracis_str_Sterne	|	T-box_NC_005945	|	BAS1350		branched-chain amino acid transport system II	*	<<<	38	|	1382579	1382900	<<<	321	|	228	>>>	BAS1351	hypothetical protein	*	T-box	1375	2e-56	X		2	RNA	Clostridium_tetani_E88_chromosome<>Bacillus_cereus_cytotoxis_NVH_391-98_chromosome	NC_003210_T1box4(-)_-_(hom)|NC_000964_T1box1(+)_+_(hom)	4	Candidate_14_NC_005945(anti),Candidate_668_NC_005945(para),T-box_NC_005945(para),T-box_NC_005945(para),T-box_NC_005945(para)	T1box3_NC_000964|UD(5'(1-1)|3'(0-0)),T1box12_NC_003210|UD(5'(1-1)|3'(0-0)),T1box4_NC_002745|UD(5'(0-0)|3'(0-0)),T1box7_NC_003210|UD(5'(0-1)|3'(0-0)),T1box5_NC_000964|UD(5'(0-0)|3'(0-0)),T1box8_NC_000964|UD(5'(1-1)|3'(0-0)),T1box4_NC_003210|UD(5'(1-1)|3'(0-0)),T1box10_NC_000964|UD(5'(0-0)|3'(1-1)),Lysine2_NC_002745|UD(5'(1-1)|3'(1-1)),T1box12_NC_000964|UD(5'(0-0)|3'(0-0)),T1box6_NC_003210|UD(5'(1-…	-	RS	-B.subtilis_sigG_1(8.64|-325)B.subtilis_sigG_3(9.56|-325)
Bacillus_anthracis_str_Sterne	|	RNaseP_bact_b_NC_005945	|	BAS1467		hypothetical protein	*	>>>	459	|	1489498	1489574	>>>	76	|	122	>>>	BAS1468	hypothetical protein	*	RNaseP_bact_b	141	3.9e-35	Z		35	RNA	Bacillus_halodurans_chromosome<>Staphylococcus_aureus_COL_chromosome<>Staphylococcus_aureus_aureus_MRSA252_chromosome<>Staphylococcus_aureus_aureus_MSSA476_chromosome<>Staphylococcus_epidermidis_RP62A_chromosome<>Streptococcus_pneumoniae_TIGR4_chromosome<>Streptococcus_pneumoniae_R6_chromosome<>Listeria_monocytogenes_chromosome<>Oceanobacillus_iheyensis_chromosome<>Streptococcus_mutans_chromosome…	NC_000964_RNaseP_bact_b(-)_-_(hom)|NC_003210_RNaseP_bact_b(-)_-_(hom)	0	-	RNaseP_bact_b_NC_000964|UD(5'(0-0)|3'(0-0)),RNaseP_bact_b_NC_003210|UD(5'(0-0)|3'(1-1)),RNaseP_bact_b_NC_002745|UD(5'(0-1)|3'(1-1))	-	-	-
Bacillus_anthracis_str_Sterne	|	T-box_NC_005945	|	BAS1700		polysaccharide biosynthesis family protein	*	<<<	65	|	1720919	1721319	>>>	400	|	278	>>>	BAS1701	sodium-dependent transporter	*	T-box	2817	7e-122	X		6	RNA	Bacillus_cereus_ATCC_10987_chromosome<>Bacillus_cereus_ATCC14579_chromosome<>Bacillus_thuringiensis_konkukian_chromosome<>Bacillus_cereus_ZK_chromosome<>Bacillus_thuringiensis_Al_Hakam_chromosome<>Bacillus_cereus_cytotoxis_NVH_391-98_chromosome	NC_000964_T1box1(+)_+_(hom)|NC_003210_T1box1(+)_+_(hom)|NC_000964_T1box5(+)_+_(hom)|NC_000964_T1box13(-)_-_(hom)|NC_003210_T1box14(-)_-_(hom)|NC_002745_T1box7(-)_-_(hom)|NC_002745_T1box8(-)_-_(hom)|NC_000964_T1box7(-)_-_(hom)|NC_003210_T1box7(-)_-_(hom)|NC_000964_T1box18(+)_+_(hom)|NC_000964_T1box9(-)_-_(hom)	13	T-box_NC_005945(para),Candidate_752_NC_005945(para),T-box_NC_005945(para),T-box_NC_005945(para),T-box_NC_005945(para),Candidate_668_NC_005945(para),T-box_NC_005945(para),T-box_NC_005945(para),T-box_NC_005945(para),T-box_NC_005945(para),Candidate_146_NC_005945(para),Candidate_147_NC_005945(para),T-box_NC_005945(para)	T1box3_NC_000964|UD(5'(1-1)|3'(0-0)),T1box12_NC_003210|UD(5'(1-1)|3'(0-0)),T1box4_NC_002745|UD(5'(0-0)|3'(0-0)),T1box7_NC_003210|UD(5'(0-1)|3'(0-0)),T1box5_NC_000964|UD(5'(0-0)|3'(0-0)),T1box8_NC_000964|UD(5'(1-1)|3'(0-0)),T1box4_NC_003210|UD(5'(1-1)|3'(0-0)),T1box10_NC_000964|UD(5'(0-0)|3'(1-1)),Lysine2_NC_002745|UD(5'(1-1)|3'(1-1)),T1box12_NC_000964|UD(5'(0-0)|3'(0-0)),T1box6_NC_003210|UD(5'(1-…	-	-	-B.subtilis_sigG_2(8.44|-302)
Bacillus_anthracis_str_Sterne	|	SAM_NC_005945	|	BAS0177		ABC transporter, substrate-binding protein,	*	<<<	31	|	177107	177344	<<<	237	|	10	<<<	BAS0178	alcohol dehydrogenase, zinc-containing	*	SAM	473	1e-15	Z		8	RNA	Listeria_monocytogenes_4b_F2365_chromosome<>Listeria_monocytogenes_chromosome<>Listeria_innocua_chromosome<>Bacillus_cereus_ATCC_10987_chromosome<>Bacillus_cereus_ATCC14579_chromosome<>Bacillus_cereus_ZK_chromosome<>Listeria_welshimeri_serovar_6b_SLCC5334_chromosome<>Bacillus_thuringiensis_Al_Hakam_chromosome	NC_003210_S_box2(-)_-_(hom)|NC_003210_S_box6(-)_-_(hom)|NC_000964_S_box6(+)_+_(hom)|NC_003210_S_box7(-)_-_(hom)|NC_000964_S_box2(+)_+_(hom)|NC_000964_S_box10(+)_+_(hom)|NC_002745_S_box2(+)_+_(hom)|NC_000964_S_box1(-)_-_(hom)|NC_000964_S_box9(-)_-_(hom)|NC_000964_S_box11(+)_+_(hom)|NC_000964_S_box7(-)_-_(hom)|NC_000964_S_box5(+)_+_(hom)|NC_000964_S_box8(-)_-_(hom)|NC_003210_S_box1(+)_+_(hom)|NC_00…	10	SAM_NC_005945(para),SAM_NC_005945(para),Candidate_118_NC_005945(para),SAM_NC_005945(para),SAM_NC_005945(para),SAM_NC_005945(para),Candidate_29_NC_005945(para),SAM_NC_005945(para),SAM_NC_005945(para),SAM_NC_005945(para)	S_box2_NC_003210|UD(5'(1-1)|3'(0-0)),S_box4_NC_000964|UD(5'(1-1)|3'(0-0)),S_box5_NC_000964|UD(5'(1-1)|3'(0-1)),S_box9_NC_000964|UD(5'(1-1)|3'(0-0)),S_box4_NC_002745|3'(0),S_box1_NC_000964|3'(0),S_box2_NC_000964|3'(0),T1box2_NC_002745|3'(0),S_box3_NC_003210|3'(0),S_box7_NC_003210|3'(0),S_box2_NC_002745|3'(0)	-	RS	-B.subtilis_sigA_2(9.4|-199)
Bacillus_anthracis_str_Sterne	|	T-box_NC_005945	|	BAS1824		hypothetical protein	*	>>>	544	|	1850287	1850572	>>>	285	|	133	>>>	BAS1825	homoserine dehydrogenase	*	T-box	484	2.8e-28	Y		3	RNA	Geobacillus_kaustophilus_HTA426_chromosome<>Bacillus_clausii_KSM-K16_chromosome<>Geobacillus_thermodenitrificans_NG80-2_chromosome	NC_000964_T1box15(-)_-_(hom)|NC_000964_T1box16(-)_-_(hom)|NC_000964_T1box17(-)_-_(hom)|NC_000964_T1box12(-)_-_(hom)|NC_003210_T1box6(-)_-_(hom)|NC_003210_T1box2(-)_-_(hom)	1	T-box_NC_005945(tandem)	T1box3_NC_000964|UD(5'(1-1)|3'(0-0)),T1box12_NC_003210|UD(5'(1-1)|3'(0-0)),T1box4_NC_002745|UD(5'(0-0)|3'(0-0)),T1box7_NC_003210|UD(5'(0-1)|3'(0-0)),T1box5_NC_000964|UD(5'(0-0)|3'(0-0)),T1box8_NC_000964|UD(5'(1-1)|3'(0-0)),T1box4_NC_003210|UD(5'(1-1)|3'(0-0)),T1box10_NC_000964|UD(5'(0-0)|3'(1-1)),Lysine2_NC_002745|UD(5'(1-1)|3'(1-1)),T1box12_NC_000964|UD(5'(0-0)|3'(0-0)),T1box6_NC_003210|UD(5'(1-…	-	-	-B.subtilis_sigA_1(11.39|-274)
Bacillus_anthracis_str_Sterne	|	T-box_NC_005945	|	BAS2020		hypothetical protein	*	>>>	1	|	2024294	2024564	>>>	270	|	28	>>>	BAS2021	arginyl-tRNA synthetase	*	T-box	1131	2.5e-45	Z		5	RNA	Bacillus_cereus_ATCC14579_chromosome<>Bacillus_thuringiensis_konkukian_chromosome<>Bacillus_cereus_ZK_chromosome<>Bacillus_thuringiensis_Al_Hakam_chromosome<>Bacillus_cereus_cytotoxis_NVH_391-98_chromosome	NC_000964_T1box3(-)_-_(hom)|NC_002745_T1box8(-)_-_(hom)|NC_002745_T1box7(-)_-_(hom)|NC_000964_T1box14(-)_-_(hom)|NC_003210_T1box4(-)_-_(hom)	7	T-box_NC_005945(para),Candidate_668_NC_005945(para),T-box_NC_005945(para),Candidate_14_NC_005945(para),T-box_NC_005945(para),T-box_NC_005945(para),T-box_NC_005945(para)	T1box3_NC_000964|UD(5'(1-1)|3'(0-0)),T1box12_NC_003210|UD(5'(1-1)|3'(0-0)),T1box4_NC_002745|UD(5'(0-0)|3'(0-0)),T1box7_NC_003210|UD(5'(0-1)|3'(0-0)),T1box5_NC_000964|UD(5'(0-0)|3'(0-0)),T1box8_NC_000964|UD(5'(1-1)|3'(0-0)),T1box4_NC_003210|UD(5'(1-1)|3'(0-0)),T1box10_NC_000964|UD(5'(0-0)|3'(1-1)),Lysine2_NC_002745|UD(5'(1-1)|3'(1-1)),T1box12_NC_000964|UD(5'(0-0)|3'(0-0)),T1box6_NC_003210|UD(5'(1-…	5	RS	-B.subtilis_sigG_2(9.52|-228)B.subtilis_sigA_1(10.25|-250)
Bacillus_anthracis_str_Sterne	|	T-box_NC_005945	|	BAS2026		TPR domain protein	*	>>>	297	|	2032858	2032919	>>>	61	|	33	>>>	BAS2027	isoleucyl-tRNA synthetase	*	T-box	210	1.3e-22	Z		7	RNA	Bacillus_cereus_ATCC_10987_chromosome<>Clostridium_tetani_E88_chromosome<>Bacillus_cereus_ATCC14579_chromosome<>Bacillus_thuringiensis_konkukian_chromosome<>Bacillus_cereus_ZK_chromosome<>Bacillus_thuringiensis_Al_Hakam_chromosome<>Bacillus_cereus_cytotoxis_NVH_391-98_chromosome	NC_000964_T1box2(+)_+_(hom)	3	Candidate_668_NC_005945(para),T-box_NC_005945(para),T-box_NC_005945(para)	T1box3_NC_000964|UD(5'(1-1)|3'(0-0)),T1box12_NC_003210|UD(5'(1-1)|3'(0-0)),T1box4_NC_002745|UD(5'(0-0)|3'(0-0)),T1box7_NC_003210|UD(5'(0-1)|3'(0-0)),T1box5_NC_000964|UD(5'(0-0)|3'(0-0)),T1box8_NC_000964|UD(5'(1-1)|3'(0-0)),T1box4_NC_003210|UD(5'(1-1)|3'(0-0)),T1box10_NC_000964|UD(5'(0-0)|3'(1-1)),Lysine2_NC_002745|UD(5'(1-1)|3'(1-1)),T1box12_NC_000964|UD(5'(0-0)|3'(0-0)),T1box6_NC_003210|UD(5'(1-…	5	RS	-
Bacillus_anthracis_str_Sterne	|	T-box_NC_005945	|	BAS2030		UDP-N-acetylmuramoylalanyl-D-glutamyl-2,	*	>>>	1	|	2039296	2039424	>>>	128	|	89	>>>	BAS2031	asparaginyl-tRNA synthetase	*	T-box	1095	1.5e-43	Z		5	RNA	Bacillus_cereus_ATCC_10987_chromosome<>Bacillus_cereus_ATCC14579_chromosome<>Bacillus_thuringiensis_konkukian_chromosome<>Bacillus_cereus_ZK_chromosome<>Bacillus_thuringiensis_Al_Hakam_chromosome	NC_000964_T1box2(+)_+_(hom)|NC_002745_T1box8(-)_-_(hom)|NC_002745_T1box7(-)_-_(hom)|NC_003210_T1box1(+)_+_(hom)|NC_000964_T1box6(+)_+_(hom)|NC_002745_T1box3(+)_+_(hom)|NC_000964_T1box17(-)_-_(hom)	6	Candidate_672_NC_005945(anti),T-box_NC_005945(para),T-box_NC_005945(para),T-box_NC_005945(para),T-box_NC_005945(para),Candidate_752_NC_005945(para),Candidate_658_NC_005945(para)	T1box3_NC_000964|UD(5'(1-1)|3'(0-0)),T1box12_NC_003210|UD(5'(1-1)|3'(0-0)),T1box4_NC_002745|UD(5'(0-0)|3'(0-0)),T1box7_NC_003210|UD(5'(0-1)|3'(0-0)),T1box5_NC_000964|UD(5'(0-0)|3'(0-0)),T1box8_NC_000964|UD(5'(1-1)|3'(0-0)),T1box4_NC_003210|UD(5'(1-1)|3'(0-0)),T1box10_NC_000964|UD(5'(0-0)|3'(1-1)),Lysine2_NC_002745|UD(5'(1-1)|3'(1-1)),T1box12_NC_000964|UD(5'(0-0)|3'(0-0)),T1box6_NC_003210|UD(5'(1-…	-	RS	-
Bacillus_anthracis_str_Sterne	|	T-box_NC_005945	|	BAS2747		chorismate synthase	*	<<<	30	|	2727489	2727732	<<<	243	|	10	<<<	BAS2748	3-deoxy-7-phosphoheptulonate synthase	*	T-box	317	5.2e-30	Z		6	RNA	Bacillus_cereus_ATCC_10987_chromosome<>Bacillus_cereus_ATCC14579_chromosome<>Bacillus_thuringiensis_konkukian_chromosome<>Bacillus_cereus_ZK_chromosome<>Bacillus_thuringiensis_Al_Hakam_chromosome<>Bacillus_cereus_cytotoxis_NVH_391-98_chromosome	NC_000964_T1box13(-)_-_(hom)|NC_003210_T1box5(-)_-_(hom)|NC_000964_T1box15(-)_-_(hom)|NC_000964_T1box16(-)_-_(hom)|NC_000964_T1box5(+)_+_(hom)|NC_003210_T1box10(-)_-_(hom)|NC_003210_T1box1(+)_+_(hom)|NC_003210_T1box3(-)_-_(hom)|NC_002745_T1box7(-)_-_(hom)|NC_002745_T1box8(-)_-_(hom)|NC_000964_T1box9(-)_-_(hom)|NC_000964_T1box7(-)_-_(hom)	12	T-box_NC_005945(para),Candidate_658_NC_005945(para),Candidate_752_NC_005945(para),T-box_NC_005945(para),T-box_NC_005945(para),T-box_NC_005945(para),T-box_NC_005945(para),T-box_NC_005945(para),Candidate_668_NC_005945(para),T-box_NC_005945(para),T-box_NC_005945(para),T-box_NC_005945(para)	T1box3_NC_000964|UD(5'(1-1)|3'(0-0)),T1box12_NC_003210|UD(5'(1-1)|3'(0-0)),T1box4_NC_002745|UD(5'(0-0)|3'(0-0)),T1box7_NC_003210|UD(5'(0-1)|3'(0-0)),T1box5_NC_000964|UD(5'(0-0)|3'(0-0)),T1box8_NC_000964|UD(5'(1-1)|3'(0-0)),T1box4_NC_003210|UD(5'(1-1)|3'(0-0)),T1box10_NC_000964|UD(5'(0-0)|3'(1-1)),Lysine2_NC_002745|UD(5'(1-1)|3'(1-1)),T1box12_NC_000964|UD(5'(0-0)|3'(0-0)),T1box6_NC_003210|UD(5'(1-…	-	RS	-B.subtilis_sigG_3(8.93|-265)
Bacillus_anthracis_str_Sterne	|	T-box_NC_005945	|	BAS2748		3-deoxy-7-phosphoheptulonate synthase	*	<<<	462	|	2729282	2729413	<<<	131	|	237	<<<	BAS2749	hypothetical protein	*	T-box	185	2.5e-16	Z		7	RNA	Bacillus_halodurans_chromosome<>Bacillus_cereus_ATCC_10987_chromosome<>Bacillus_cereus_ATCC14579_chromosome<>Bacillus_thuringiensis_konkukian_chromosome<>Bacillus_cereus_ZK_chromosome<>Bacillus_thuringiensis_Al_Hakam_chromosome<>Bacillus_cereus_cytotoxis_NVH_391-98_chromosome	NC_000964_T1box13(-)_-_(hom)|NC_003210_T1box1(+)_+_(hom)|NC_002745_T1box8(-)_-_(hom)|NC_003210_T1box11(-)_-_(hom)|NC_002745_T1box7(-)_-_(hom)|NC_002745_T1box4(+)_+_(hom)|NC_003210_T1box3(-)_-_(hom)|NC_000964_T1box18(+)_+_(hom)|NC_003210_T1box7(-)_-_(hom)|NC_000964_T1box9(-)_-_(hom)|NC_000964_T1box7(-)_-_(hom)	5	T-box_NC_005945(para),Candidate_658_NC_005945(para),T-box_NC_005945(para),T-box_NC_005945(para),T-box_NC_005945(para)	T1box3_NC_000964|UD(5'(1-1)|3'(0-0)),T1box12_NC_003210|UD(5'(1-1)|3'(0-0)),T1box4_NC_002745|UD(5'(0-0)|3'(0-0)),T1box7_NC_003210|UD(5'(0-1)|3'(0-0)),T1box5_NC_000964|UD(5'(0-0)|3'(0-0)),T1box8_NC_000964|UD(5'(1-1)|3'(0-0)),T1box4_NC_003210|UD(5'(1-1)|3'(0-0)),T1box10_NC_000964|UD(5'(0-0)|3'(1-1)),Lysine2_NC_002745|UD(5'(1-1)|3'(1-1)),T1box12_NC_000964|UD(5'(0-0)|3'(0-0)),T1box6_NC_003210|UD(5'(1-…	-	-	-
Bacillus_anthracis_str_Sterne	|	Lysine_NC_005945	|	BAS2861		acetyltransferase, GNAT family	*	<<<	79	|	2833868	2834366	>>>	498	|	49	>>>	BAS2862	lysine-specific permease	*	Lysine	2093	2.4e-89	X		1	COD	Bacillus_cereus_cytotoxis_NVH_391-98_chromosome	NC_003210_Lysine(-)_-_(hom)|NC_000964_Lysine2(-)_-_(hom)	0	-	Lysine_NC_003210|3'(0),Lysine2_NC_002745|3'(0)	5	-	-B.subtilis_sigA_2(9.56|-300)B.subtilis_sigA_3(9.09|-157)
Bacillus_anthracis_str_Sterne	|	TPP_NC_005945	|	BAS0361		DNA topoisomerase III	*	<<<	187	|	393888	394072	>>>	184	|	36	>>>	BAS0362	hydroxyethylthiazole kinase	*	TPP	480	2.2e-16	X		6	RNA	Bacillus_cereus_ATCC_10987_chromosome<>Bacillus_thuringiensis_konkukian_chromosome<>Bacillus_cereus_ZK_chromosome<>Bacillus_thuringiensis_Al_Hakam_chromosome<>Geobacillus_thermodenitrificans_NG80-2_chromosome<>Bacillus_cereus_cytotoxis_NVH_391-98_chromosome	NC_000964_THI5(+)_+_(hom)|NC_003210_THI1(+)_+_(hom)|NC_003210_THI2(-)_-_(hom)	1	TPP_NC_005945(para)	THI2_NC_000964|3'(0),THI1_NC_000964|3'(0),THI1_NC_002505|3'(0),THI2_NC_000913|3'(0),THI_NC_002516|3'(0),THI1_NC_003112|3'(0),THI_NC_005072|3'(0)	5	RS	-
Bacillus_anthracis_str_Sterne	|	T-box_NC_005945	|	BAS4029		hypothetical protein	*	<<<	11	|	3965090	3965437	>>>	347	|	255	>>>	BAS4030	Na+/H+ antiporter NhaC	*	T-box	580	2.4e-27	X		6	RNA	Bacillus_cereus_ATCC_10987_chromosome<>Bacillus_cereus_ATCC14579_chromosome<>Bacillus_thuringiensis_konkukian_chromosome<>Bacillus_cereus_ZK_chromosome<>Bacillus_thuringiensis_Al_Hakam_chromosome<>Bacillus_cereus_cytotoxis_NVH_391-98_chromosome	NC_000964_T1box18(+)_+_(hom)|NC_003210_T1box1(+)_+_(hom)|NC_000964_T1box5(+)_+_(hom)|NC_000964_T1box13(-)_-_(hom)|NC_000964_T1box1(+)_+_(hom)|NC_002745_T1box8(-)_-_(hom)|NC_000964_T1box3(-)_-_(hom)|NC_000964_T1box10(-)_-_(hom)|NC_002745_T1box7(-)_-_(hom)	7	Candidate_658_NC_005945(para),T-box_NC_005945(para),T-box_NC_005945(para),T-box_NC_005945(para),T-box_NC_005945(para),T-box_NC_005945(para),T-box_NC_005945(para)	T1box3_NC_000964|UD(5'(1-1)|3'(0-0)),T1box12_NC_003210|UD(5'(1-1)|3'(0-0)),T1box4_NC_002745|UD(5'(0-0)|3'(0-0)),T1box7_NC_003210|UD(5'(0-1)|3'(0-0)),T1box5_NC_000964|UD(5'(0-0)|3'(0-0)),T1box8_NC_000964|UD(5'(1-1)|3'(0-0)),T1box4_NC_003210|UD(5'(1-1)|3'(0-0)),T1box10_NC_000964|UD(5'(0-0)|3'(1-1)),Lysine2_NC_002745|UD(5'(1-1)|3'(1-1)),T1box12_NC_000964|UD(5'(0-0)|3'(0-0)),T1box6_NC_003210|UD(5'(1-…	-	-	-
Bacillus_anthracis_str_Sterne	|	SAM_NC_005945	|	BAS4157		bifunctional homocysteine	*	<<<	24	|	4074425	4074870	<<<	445	|	116	>>>	BAS4158	cystathionine beta-lyase	*	SAM	2326	1.7e-99	X		1	RNA	Bacillus_thuringiensis_Al_Hakam_chromosome	NC_003210_S_box3(-)_-_(hom)|NC_000964_S_box1(-)_-_(hom)|NC_003210_S_box6(-)_-_(hom)|NC_002745_S_box2(+)_+_(hom)|NC_000964_S_box2(+)_+_(hom)|NC_003210_S_box2(-)_-_(hom)|NC_000964_S_box11(+)_+_(hom)|NC_000964_S_box7(-)_-_(hom)|NC_000964_S_box10(+)_+_(hom)|NC_002745_S_box4(-)_-_(hom)|NC_003210_S_box5(-)_-_(hom)|NC_003210_S_box3(-)_-_(hom|rev)|NC_000964_S_box9(-)_-_(hom)|NC_000964_S_box1(-)_-_(hom|re…	9	Candidate_66_NC_005945(anti),Candidate_105_NC_005945(tandem),SAM_NC_005945(anti),SAM_NC_005945(para),Candidate_118_NC_005945(para),SAM_NC_005945(para),Candidate_29_NC_005945(para),SAM_NC_005945(para),SAM_NC_005945(para),SAM_NC_005945(para),SAM_NC_005945(para),SAM_NC_005945(para)	S_box2_NC_003210|UD(5'(1-1)|3'(0-0)),S_box4_NC_000964|UD(5'(1-1)|3'(0-0)),S_box5_NC_000964|UD(5'(1-1)|3'(0-1)),S_box9_NC_000964|UD(5'(1-1)|3'(0-0)),S_box4_NC_002745|3'(0),S_box1_NC_000964|3'(0),S_box2_NC_000964|3'(0),T1box2_NC_002745|3'(0),S_box3_NC_003210|3'(0),S_box7_NC_003210|3'(0),S_box2_NC_002745|3'(0)	5	RS	-
Bacillus_anthracis_str_Sterne	|	T-box_NC_005945	|	BAS0381		hypothetical protein	*	>>>	1	|	414051	414370	>>>	319	|	26	>>>	BAS0382	prolyl-tRNA synthetase	*	T-box	1243	1.9e-50	Y		6	RNA	Bacillus_cereus_ATCC_10987_chromosome<>Bacillus_cereus_ATCC14579_chromosome<>Bacillus_thuringiensis_konkukian_chromosome<>Bacillus_cereus_ZK_chromosome<>Bacillus_thuringiensis_Al_Hakam_chromosome<>Bacillus_cereus_cytotoxis_NVH_391-98_chromosome	NC_000964_T1box1(+)_+_(hom)|NC_000964_T1box8(-)_-_(hom)|NC_000964_T1box3(-)_-_(hom)|NC_002745_sprC(-)_-_(hom|rev)	1	T-box_NC_005945(para)	T1box3_NC_000964|UD(5'(1-1)|3'(0-0)),T1box12_NC_003210|UD(5'(1-1)|3'(0-0)),T1box4_NC_002745|UD(5'(0-0)|3'(0-0)),T1box7_NC_003210|UD(5'(0-1)|3'(0-0)),T1box5_NC_000964|UD(5'(0-0)|3'(0-0)),T1box8_NC_000964|UD(5'(1-1)|3'(0-0)),T1box4_NC_003210|UD(5'(1-1)|3'(0-0)),T1box10_NC_000964|UD(5'(0-0)|3'(1-1)),Lysine2_NC_002745|UD(5'(1-1)|3'(1-1)),T1box12_NC_000964|UD(5'(0-0)|3'(0-0)),T1box6_NC_003210|UD(5'(1-…	5	RS	-B.subtilis_sigK_1(9.12|-107)B.subtilis_sigG_2(10.28|-341)B.subtilis_sigG_2(8.78|-297)B.subtilis_sigG_2(8.15|-287)
Bacillus_anthracis_str_Sterne	|	T-box_NC_005945	|	BAS4252		minor extracellular protease VpR	*	>>>	1	|	4166540	4166860	>>>	320	|	415	>>>	BAS4253	phenylalanine-4-hydroxylase, putative	*	T-box	193	1.8e-16	Z		6	RNA	Bacillus_cereus_ATCC_10987_chromosome<>Bacillus_cereus_ATCC14579_chromosome<>Bacillus_thuringiensis_konkukian_chromosome<>Bacillus_cereus_ZK_chromosome<>Bacillus_thuringiensis_Al_Hakam_chromosome<>Bacillus_cereus_cytotoxis_NVH_391-98_chromosome	NC_003210_T1box1(+)_+_(hom)|NC_000964_T1box13(-)_-_(hom)|NC_002745_T1box7(-)_-_(hom)|NC_002745_T1box8(-)_-_(hom)|NC_000964_T1box18(+)_+_(hom)|NC_000964_T1box1(+)_+_(hom)|NC_003210_T1box10(-)_-_(hom)|NC_003210_T1box2(-)_-_(hom)|NC_003210_T1box3(-)_-_(hom)	8	Candidate_658_NC_005945(para),T-box_NC_005945(para),Candidate_752_NC_005945(para),T-box_NC_005945(para),T-box_NC_005945(para),T-box_NC_005945(para),T-box_NC_005945(para),Candidate_668_NC_005945(para)	T1box3_NC_000964|UD(5'(1-1)|3'(0-0)),T1box12_NC_003210|UD(5'(1-1)|3'(0-0)),T1box4_NC_002745|UD(5'(0-0)|3'(0-0)),T1box7_NC_003210|UD(5'(0-1)|3'(0-0)),T1box5_NC_000964|UD(5'(0-0)|3'(0-0)),T1box8_NC_000964|UD(5'(1-1)|3'(0-0)),T1box4_NC_003210|UD(5'(1-1)|3'(0-0)),T1box10_NC_000964|UD(5'(0-0)|3'(1-1)),Lysine2_NC_002745|UD(5'(1-1)|3'(1-1)),T1box12_NC_000964|UD(5'(0-0)|3'(0-0)),T1box6_NC_003210|UD(5'(1-…	-	-	-B.subtilis_sigG_2(8.51|-436)B.subtilis_sigA_3(12.5|-281)
Bacillus_anthracis_str_Sterne	|	T-box_NC_005945	|	BAS4284		alanyl-tRNA synthetase	*	<<<	21	|	4195681	4195968	<<<	287	|	173	>>>	BAS4285	hypothetical protein	*	T-box	331	1.8e-38	X		6	RNA	Bacillus_cereus_ATCC_10987_chromosome<>Bacillus_cereus_ATCC14579_chromosome<>Bacillus_thuringiensis_konkukian_chromosome<>Bacillus_cereus_ZK_chromosome<>Bacillus_thuringiensis_Al_Hakam_chromosome<>Bacillus_cereus_cytotoxis_NVH_391-98_chromosome	NC_000964_T1box8(-)_-_(hom)|NC_002745_T1box8(-)_-_(hom)|NC_002745_T1box7(-)_-_(hom)|NC_003210_T1box4(-)_-_(hom)|NC_000964_T1box14(-)_-_(hom)|NC_000964_T1box17(-)_-_(hom)|NC_003210_T1box2(-)_-_(hom)|NC_003210_T1box1(+)_+_(hom)|NC_000964_T1box7(-)_-_(hom)|NC_003210_T1box14(-)_-_(hom)	9	T-box_NC_005945(para),Candidate_668_NC_005945(para),T-box_NC_005945(para),T-box_NC_005945(para),Candidate_672_NC_005945(para),T-box_NC_005945(para),T-box_NC_005945(para),T-box_NC_005945(para),T-box_NC_005945(para)	T1box3_NC_000964|UD(5'(1-1)|3'(0-0)),T1box12_NC_003210|UD(5'(1-1)|3'(0-0)),T1box4_NC_002745|UD(5'(0-0)|3'(0-0)),T1box7_NC_003210|UD(5'(0-1)|3'(0-0)),T1box5_NC_000964|UD(5'(0-0)|3'(0-0)),T1box8_NC_000964|UD(5'(1-1)|3'(0-0)),T1box4_NC_003210|UD(5'(1-1)|3'(0-0)),T1box10_NC_000964|UD(5'(0-0)|3'(1-1)),Lysine2_NC_002745|UD(5'(1-1)|3'(1-1)),T1box12_NC_000964|UD(5'(0-0)|3'(0-0)),T1box6_NC_003210|UD(5'(1-…	5	RS	-B.subtilis_sigK_1(10|-360)B.subtilis_sigA_3(9.78|-253)
Bacillus_anthracis_str_Sterne	|	T-box_NC_005945	|	BAS4445		branched-chain amino acid transport system II	*	<<<	93	|	4356940	4357011	<<<	71	|	311	<<<	BAS4446	RNA pseudouridylate synthase	*	T-box	254	1.7e-19	Z		8	RNA	Bacillus_halodurans_chromosome<>Bacillus_cereus_ATCC_10987_chromosome<>Bacillus_cereus_ATCC14579_chromosome<>Bacillus_thuringiensis_konkukian_chromosome<>Bacillus_cereus_ZK_chromosome<>Bacillus_clausii_KSM-K16_chromosome<>Bacillus_thuringiensis_Al_Hakam_chromosome<>Bacillus_cereus_cytotoxis_NVH_391-98_chromosome	NC_000964_T1box12(-)_-_(hom)|NC_000964_T1box15(-)_-_(hom)|NC_003210_T1box2(-)_-_(hom)	1	T-box_NC_005945(para)	T1box3_NC_000964|UD(5'(1-1)|3'(0-0)),T1box12_NC_003210|UD(5'(1-1)|3'(0-0)),T1box4_NC_002745|UD(5'(0-0)|3'(0-0)),T1box7_NC_003210|UD(5'(0-1)|3'(0-0)),T1box5_NC_000964|UD(5'(0-0)|3'(0-0)),T1box8_NC_000964|UD(5'(1-1)|3'(0-0)),T1box4_NC_003210|UD(5'(1-1)|3'(0-0)),T1box10_NC_000964|UD(5'(0-0)|3'(1-1)),Lysine2_NC_002745|UD(5'(1-1)|3'(1-1)),T1box12_NC_000964|UD(5'(0-0)|3'(0-0)),T1box6_NC_003210|UD(5'(1-…	-	RS	-
Bacillus_anthracis_str_Sterne	|	T-box_NC_005945	|	BAS4456		phenylalanyl-tRNA synthetase alpha subunit	*	<<<	26	|	4370525	4370775	<<<	250	|	43	<<<	BAS4457	RNA methyltransferase, TrmH family	*	T-box	525	4.6e-18	Y		10	RNA	Listeria_monocytogenes_4b_F2365_chromosome<>Listeria_monocytogenes_chromosome<>Listeria_innocua_chromosome<>Bacillus_cereus_ATCC_10987_chromosome<>Oceanobacillus_iheyensis_chromosome<>Bacillus_cereus_ATCC14579_chromosome<>Bacillus_thuringiensis_konkukian_chromosome<>Bacillus_cereus_ZK_chromosome<>Geobacillus_kaustophilus_HTA426_chromosome<>Bacillus_cereus_cytotoxis_NVH_391-98_chromosome	NC_003210_T1box1(+)_+_(hom)|NC_003210_T1box5(-)_-_(hom)|NC_000964_T1box9(-)_-_(hom)|NC_000964_T1box5(+)_+_(hom)|NC_002745_T1box7(-)_-_(hom)|NC_002745_T1box8(-)_-_(hom)|NC_000964_T1box6(+)_+_(hom)|NC_003210_T1box14(-)_-_(hom)|NC_000964_T1box17(-)_-_(hom)|NC_000964_T1box13(-)_-_(hom)|NC_002745_T1box4(+)_+_(hom)|NC_000964_T1box1(+)_+_(hom)|NC_000964_T1box2(+)_+_(hom)|NC_002745_SRP_bact(+)_+_(hom)|NC…	11	T-box_NC_005945(para),T-box_NC_005945(para),T-box_NC_005945(para),T-box_NC_005945(para),T-box_NC_005945(para),Candidate_752_NC_005945(para),T-box_NC_005945(para),T-box_NC_005945(para),T-box_NC_005945(para),Candidate_672_NC_005945(para),T-box_NC_005945(para)	T1box3_NC_000964|UD(5'(1-1)|3'(0-0)),T1box12_NC_003210|UD(5'(1-1)|3'(0-0)),T1box4_NC_002745|UD(5'(0-0)|3'(0-0)),T1box7_NC_003210|UD(5'(0-1)|3'(0-0)),T1box5_NC_000964|UD(5'(0-0)|3'(0-0)),T1box8_NC_000964|UD(5'(1-1)|3'(0-0)),T1box4_NC_003210|UD(5'(1-1)|3'(0-0)),T1box10_NC_000964|UD(5'(0-0)|3'(1-1)),Lysine2_NC_002745|UD(5'(1-1)|3'(1-1)),T1box12_NC_000964|UD(5'(0-0)|3'(0-0)),T1box6_NC_003210|UD(5'(1-…	5	RS	-B.subtilis_sigA_2(9.63|-279)
Bacillus_anthracis_str_Sterne	|	T-box_NC_005945	|	BAS4472		threonyl-tRNA synthetase	*	<<<	28	|	4384187	4384462	<<<	275	|	2	<<<	BAS4473	hypothetical protein	*	T-box	550	4.1e-19	Z		8	RNA	Bacillus_cereus_ATCC_10987_chromosome<>Bacillus_cereus_ATCC14579_chromosome<>Bacillus_thuringiensis_konkukian_chromosome<>Bacillus_cereus_ZK_chromosome<>Geobacillus_kaustophilus_HTA426_chromosome<>Bacillus_thuringiensis_Al_Hakam_chromosome<>Geobacillus_thermodenitrificans_NG80-2_chromosome<>Bacillus_cereus_cytotoxis_NVH_391-98_chromosome	NC_000964_T1box15(-)_-_(hom)|NC_000964_T1box16(-)_-_(hom)|NC_000964_T1box17(-)_-_(hom)|NC_000964_T1box12(-)_-_(hom)|NC_003210_T1box6(-)_-_(hom)|NC_000964_T1box5(+)_+_(hom)|NC_003210_T1box5(-)_-_(hom)|NC_000964_T1box1(+)_+_(hom)|NC_000964_T1box13(-)_-_(hom)|NC_003210_T1box2(-)_-_(hom)|NC_002745_T1box1(+)_+_(hom)|NC_000964_T1box14(-)_-_(hom)	8	T-box_NC_005945(para),T-box_NC_005945(para),T-box_NC_005945(para),T-box_NC_005945(para),T-box_NC_005945(para),T-box_NC_005945(para),T-box_NC_005945(para),T-box_NC_005945(para)	T1box3_NC_000964|UD(5'(1-1)|3'(0-0)),T1box12_NC_003210|UD(5'(1-1)|3'(0-0)),T1box4_NC_002745|UD(5'(0-0)|3'(0-0)),T1box7_NC_003210|UD(5'(0-1)|3'(0-0)),T1box5_NC_000964|UD(5'(0-0)|3'(0-0)),T1box8_NC_000964|UD(5'(1-1)|3'(0-0)),T1box4_NC_003210|UD(5'(1-1)|3'(0-0)),T1box10_NC_000964|UD(5'(0-0)|3'(1-1)),Lysine2_NC_002745|UD(5'(1-1)|3'(1-1)),T1box12_NC_000964|UD(5'(0-0)|3'(0-0)),T1box6_NC_003210|UD(5'(1-…	5	RS	-B.subtilis_sigG_1(9.85|-400)B.subtilis_sigG_3(9.66|-248)B.subtilis_sigA_2(11.39|-269)
Bacillus_anthracis_str_Sterne	|	T-box_NC_005945	|	BAS4556		tyrosyl-tRNA synthetase	*	<<<	52	|	4462879	4463180	<<<	301	|	22	<<<	BAS4557	hypothetical protein	*	T-box	568	2.7e-20	Z		6	RNA	Bacillus_cereus_ATCC_10987_chromosome<>Bacillus_cereus_ATCC14579_chromosome<>Bacillus_thuringiensis_konkukian_chromosome<>Bacillus_cereus_ZK_chromosome<>Bacillus_thuringiensis_Al_Hakam_chromosome<>Bacillus_cereus_cytotoxis_NVH_391-98_chromosome	NC_000964_T1box13(-)_-_(hom)|NC_003210_T1box9(-)_-_(hom)|NC_000964_T1box5(+)_+_(hom)|NC_000964_T1box18(+)_+_(hom)|NC_002745_T1box7(-)_-_(hom)|NC_000964_T1box7(-)_-_(hom)|NC_002745_T1box8(-)_-_(hom)|NC_002745_T1box3(+)_+_(hom)|NC_000964_T1box9(-)_-_(hom)	6	Candidate_658_NC_005945(para),T-box_NC_005945(para),T-box_NC_005945(para),Candidate_668_NC_005945(para),T-box_NC_005945(para),T-box_NC_005945(para)	T1box3_NC_000964|UD(5'(1-1)|3'(0-0)),T1box12_NC_003210|UD(5'(1-1)|3'(0-0)),T1box4_NC_002745|UD(5'(0-0)|3'(0-0)),T1box7_NC_003210|UD(5'(0-1)|3'(0-0)),T1box5_NC_000964|UD(5'(0-0)|3'(0-0)),T1box8_NC_000964|UD(5'(1-1)|3'(0-0)),T1box4_NC_003210|UD(5'(1-1)|3'(0-0)),T1box10_NC_000964|UD(5'(0-0)|3'(1-1)),Lysine2_NC_002745|UD(5'(1-1)|3'(1-1)),T1box12_NC_000964|UD(5'(0-0)|3'(0-0)),T1box6_NC_003210|UD(5'(1-…	-	RS	-
Bacillus_anthracis_str_Sterne	|	T-box_NC_005945	|	BAS4637		leucyl-tRNA synthetase	*	<<<	46	|	4532028	4532087	<<<	59	|	368	<<<	BAS4638	permease, putative	*	T-box	232	4.6e-17	Z		10	RNA	Bacillus_cereus_ATCC_10987_chromosome<>Oceanobacillus_iheyensis_chromosome<>Bacillus_cereus_ATCC14579_chromosome<>Bacillus_thuringiensis_konkukian_chromosome<>Bacillus_licheniformis_ATCC_14580_chromosome<>Bacillus_cereus_ZK_chromosome<>Bacillus_licheniformis_DSM_13_chromosome<>Bacillus_thuringiensis_Al_Hakam_chromosome<>Bacillus_cereus_cytotoxis_NVH_391-98_chromosome<>Bacillus_amyloliquefaciens_F…	NC_000964_T1box14(-)_-_(hom)|NC_000964_T1box5(+)_+_(hom)|NC_003210_T1box10(-)_-_(hom)|NC_003210_T1box4(-)_-_(hom)|NC_000964_T1box13(-)_-_(hom)|NC_000964_T1box1(+)_+_(hom)	9	Candidate_752_NC_005945(para),T-box_NC_005945(para),T-box_NC_005945(para),T-box_NC_005945(para),T-box_NC_005945(para),T-box_NC_005945(para),T-box_NC_005945(para),Candidate_14_NC_005945(para),T-box_NC_005945(para)	T1box3_NC_000964|UD(5'(1-1)|3'(0-0)),T1box12_NC_003210|UD(5'(1-1)|3'(0-0)),T1box4_NC_002745|UD(5'(0-0)|3'(0-0)),T1box7_NC_003210|UD(5'(0-1)|3'(0-0)),T1box5_NC_000964|UD(5'(0-0)|3'(0-0)),T1box8_NC_000964|UD(5'(1-1)|3'(0-0)),T1box4_NC_003210|UD(5'(1-1)|3'(0-0)),T1box10_NC_000964|UD(5'(0-0)|3'(1-1)),Lysine2_NC_002745|UD(5'(1-1)|3'(1-1)),T1box12_NC_000964|UD(5'(0-0)|3'(0-0)),T1box6_NC_003210|UD(5'(1-…	-	RS	-
Bacillus_anthracis_str_Sterne	|	T-box_NC_005945	|	BAS4886		amino acid permease family protein	*	<<<	46	|	4770184	4770455	<<<	271	|	277	<<<	BAS4888	hypothetical protein	*	T-box	233	1.8e-23	Y		6	RNA	Bacillus_halodurans_chromosome<>Bacillus_cereus_ATCC_10987_chromosome<>Bacillus_cereus_ZK_chromosome<>Geobacillus_kaustophilus_HTA426_chromosome<>Geobacillus_thermodenitrificans_NG80-2_chromosome<>Bacillus_cereus_cytotoxis_NVH_391-98_chromosome	NC_000964_T1box12(-)_-_(hom)|NC_003210_T1box6(-)_-_(hom)|NC_000964_T1box15(-)_-_(hom)|NC_000964_T1box16(-)_-_(hom)|NC_000964_T1box17(-)_-_(hom)|NC_002745_T1box7(-)_-_(hom)|NC_000964_T1box1(+)_+_(hom)|NC_002745_T1box1(+)_+_(hom)|NC_000964_T1box5(+)_+_(hom)	6	Candidate_589_NC_005945(tandem),T-box_NC_005945(para),T-box_NC_005945(para),T-box_NC_005945(para),Candidate_359_NC_005945(para),T-box_NC_005945(para)	T1box3_NC_000964|UD(5'(1-1)|3'(0-0)),T1box12_NC_003210|UD(5'(1-1)|3'(0-0)),T1box4_NC_002745|UD(5'(0-0)|3'(0-0)),T1box7_NC_003210|UD(5'(0-1)|3'(0-0)),T1box5_NC_000964|UD(5'(0-0)|3'(0-0)),T1box8_NC_000964|UD(5'(1-1)|3'(0-0)),T1box4_NC_003210|UD(5'(1-1)|3'(0-0)),T1box10_NC_000964|UD(5'(0-0)|3'(1-1)),Lysine2_NC_002745|UD(5'(1-1)|3'(1-1)),T1box12_NC_000964|UD(5'(0-0)|3'(0-0)),T1box6_NC_003210|UD(5'(1-…	-	RS	-B.subtilis_sigG_2(8.18|-312)B.subtilis_sigA_1(11.39|-282)
Bacillus_anthracis_str_Sterne	|	yybP-ykoY_NC_005945	|	BAS0771		hypothetical protein	*	<<<	102	|	823852	824078	>>>	226	|	23	>>>	BAS0772	hypothetical protein	*	yybP-ykoY	483	3.4e-16	X		7	RNA	Bacillus_halodurans_chromosome<>Bacillus_cereus_ATCC_10987_chromosome<>Bacillus_cereus_ATCC14579_chromosome<>Bacillus_thuringiensis_konkukian_chromosome<>Bacillus_cereus_ZK_chromosome<>Bacillus_thuringiensis_Al_Hakam_chromosome<>Geobacillus_thermodenitrificans_NG80-2_chromosome	NC_000964_yybP1ykoY2(-)_-_(hom)|NC_003210_yybP1ykoY(+)_+_(hom)	0	-	yybP1ykoY_NC_003210|3'(0),yybP1ykoY1_NC_000964|3'(0),yybP1ykoY_NC_002745|3'(0)	5	-	-
Bacillus_cereus_ATCC_10987	|	Candidate_113_NC_003909	|	BCE_0235		hypothetical protein	*	>>>	1	|	238837	239153	>>>	316	|	255	>>>	BCE_0236	hypothetical protein	*	candidate	2515	3.3e-108	T		5	RNA	Bacillus_anthracis_Ames_chromosome<>Bacillus_anthracis_str_Sterne_chromosome<>Bacillus_thuringiensis_konkukian_chromosome<>Bacillus_anthracis_Ames_0581_chromosome<>Bacillus_thuringiensis_Al_Hakam_chromosome	NC_002745_sprF(+)_+_(hom|rev)	0	-	-	-	-	-B.subtilis_sigG_1(8.19|-416)B.subtilis_sigG_2(8.42|-137)
Bacillus_cereus_ATCC_10987	|	Candidate_128_NC_003909	|	BCE_0494		hypothetical protein	*	>>>	22	|	510162	510387	>>>	225	|	78	>>>	BCE_0495	ABC transporter, ATP-binding protein	*	candidate	1429	8.6e-59	B		2	RNA	Bacillus_thuringiensis_konkukian_chromosome<>Bacillus_thuringiensis_Al_Hakam_chromosome	NC_000964_Purine5(+)_+_(hom)	0	-	rliI_NC_003210|3'(0)	5	-	-B.subtilis_sigK_1(9.95|-215)
Bacillus_cereus_ATCC_10987	|	Candidate_157_NC_003909	|	BCE_1037		protein-export membrane protein-related protein	*	>>>	7	|	1066217	1066456	<<<	239	|	79	<<<	BCE_1038	hypothetical protein	*	candidate	928	3.2e-36	T		5	RNA	Bacillus_anthracis_Ames_chromosome<>Bacillus_anthracis_str_Sterne_chromosome<>Bacillus_thuringiensis_konkukian_chromosome<>Bacillus_anthracis_Ames_0581_chromosome<>Bacillus_thuringiensis_Al_Hakam_chromosome	NC_002505_B2(-)_-_(hom)	1	Candidate_158_NC_003909(para)	-	-	-	-B.subtilis_sigG_1(8.12|-170)B.subtilis_sigG_2(8.64|-142)B.subtilis_sigG_3(8.43|-152)
Bacillus_cereus_ATCC_10987	|	Candidate_186_NC_003909	|	BCE_1596		spore maturation protein	*	>>>	1	|	1567019	1567095	>>>	76	|	211	>>>	BCE_1597	ribosomal large subunit pseudouridine synthase	*	candidate	1391	4.7e-57	T		5	RNA	Bacillus_anthracis_Ames_chromosome<>Bacillus_anthracis_str_Sterne_chromosome<>Bacillus_thuringiensis_konkukian_chromosome<>Bacillus_anthracis_Ames_0581_chromosome<>Bacillus_thuringiensis_Al_Hakam_chromosome	NC_002745_sprC(-)_-_(hom|rev)	0	-	-	-	-	-
Bacillus_cereus_ATCC_10987	|	Candidate_194_NC_003909	|	BCE_1818		hypothetical protein	*	>>>	1	|	1757975	1758044	>>>	69	|	90	>>>	BCE_1819	hypothetical protein	*	candidate	574	2.1e-20	T		5	-	Bacillus_anthracis_Ames_chromosome<>Bacillus_anthracis_str_Sterne_chromosome<>Bacillus_thuringiensis_konkukian_chromosome<>Bacillus_anthracis_Ames_0581_chromosome<>Bacillus_thuringiensis_Al_Hakam_chromosome	NC_003210_rliE(+)_+_(hom|rev)	1	SAM_NC_003909(para)	-	-	-	-
Bacillus_cereus_ATCC_10987	|	Candidate_196_NC_003909	|	BCE_1882		hypothetical protein	*	<<<	84	|	1816754	1817022	<<<	268	|	0	<<<	BCE_1883	aspartate kinase II	*	candidate	1239	2.9e-50	T		3	RNA	Bacillus_anthracis_Ames_chromosome<>Bacillus_anthracis_str_Sterne_chromosome<>Bacillus_anthracis_Ames_0581_chromosome	NC_002745_T1box1(+)_+_(hom)	0	-	-	-	-	-B.subtilis_sigA_2(9.04|-390)B.subtilis_sigA_3(9.72|-390)
Bacillus_cereus_ATCC_10987	|	Candidate_206_NC_003909	|	BCE_2245		pseudogene	*	>>>	112	|	2152986	2153352	>>>	366	|	92	>>>	BCE_2246	sodium-dependent transporter, putative	*	candidate	1989	2.7e-84	T		5	RNA	Bacillus_anthracis_Ames_chromosome<>Bacillus_anthracis_str_Sterne_chromosome<>Bacillus_thuringiensis_konkukian_chromosome<>Bacillus_anthracis_Ames_0581_chromosome<>Bacillus_thuringiensis_Al_Hakam_chromosome	NC_003210_T1box14(-)_-_(hom)|NC_003210_T1box11(-)_-_(hom)|NC_000964_T1box11(-)_-_(hom)|NC_003210_T1box13(+)_+_(hom)|NC_000964_T1box13(-)_-_(hom)	2	T-box_NC_003909(para),T-box_NC_003909(para)	-	-	RS	-B.subtilis_sigG_3(8.21|-414)B.subtilis_sigA_2(10.77|-308)
Bacillus_cereus_ATCC_10987	|	Candidate_214_NC_003909	|	BCE_2383		homoserine/threonine efflux protein, putative	*	<<<	101	|	2274947	2275009	<<<	62	|	59	<<<	BCE_2384	enoyl-CoA hydratase	*	candidate	668	3.4e-24	T		4	RNA	Bacillus_anthracis_Ames_chromosome<>Bacillus_anthracis_str_Sterne_chromosome<>Bacillus_thuringiensis_konkukian_chromosome<>Bacillus_anthracis_Ames_0581_chromosome	NC_000964_Purine5(+)_+_(hom|rev)	3	Candidate_147_NC_003909(para),Candidate_476_NC_003909(para),Candidate_76_NC_003909(para)	-	-	-	-
Bacillus_cereus_ATCC_10987	|	Candidate_242_NC_003909	|	BCE_2956		hypothetical protein	*	>>>	108	|	2769213	2769332	<<<	119	|	0	<<<	BCE_2957	hypothetical protein	*	candidate	1111	1.3e-44	B		5	RNA	Bacillus_anthracis_Ames_chromosome<>Bacillus_anthracis_str_Sterne_chromosome<>Bacillus_thuringiensis_konkukian_chromosome<>Bacillus_anthracis_Ames_0581_chromosome<>Bacillus_thuringiensis_Al_Hakam_chromosome	NC_002745_T1box9(-)_-_(hom)	0	-	-	-	-	-
Bacillus_cereus_ATCC_10987	|	Candidate_251_NC_003909	|	BCE_3239		bifunctional P-450:NADPH-P450 reductase 1	*	<<<	286	|	3030078	3030178	<<<	100	|	43	<<<	BCE_3240	drug resistance transporter, EmrB/QacA family	*	candidate	113	2.7e-16	T		5	-	Bacillus_anthracis_Ames_chromosome<>Bacillus_anthracis_str_Sterne_chromosome<>Bacillus_thuringiensis_konkukian_chromosome<>Bacillus_anthracis_Ames_0581_chromosome<>Bacillus_thuringiensis_Al_Hakam_chromosome	NC_002745_glmS(-)_-_(hom|rev)	0	-	-	-	-	-
Bacillus_cereus_ATCC_10987	|	Candidate_261_NC_003909	|	BCE_3518		FAD-binding monooxygenase, PheA/TfdB family	*	<<<	211	|	3274657	3274769	<<<	112	|	0	<<<	BCE_3519	hypothetical protein	*	candidate	1248	8.7e-51	T		5	RNA	Bacillus_anthracis_Ames_chromosome<>Bacillus_anthracis_str_Sterne_chromosome<>Bacillus_thuringiensis_konkukian_chromosome<>Bacillus_anthracis_Ames_0581_chromosome<>Bacillus_thuringiensis_Al_Hakam_chromosome	NC_002745_sprC(-)_-_(hom)	0	-	-	-	-	-
Bacillus_cereus_ATCC_10987	|	Candidate_267_NC_003909	|	BCE_3652		helix-turn-helix domain protein	*	<<<	220	|	3404751	3404980	<<<	229	|	0	<<<	BCE_3653	hypothetical protein	*	candidate	1037	2.1e-41	T		3	RNA	Bacillus_anthracis_str_Sterne_chromosome<>Bacillus_thuringiensis_konkukian_chromosome<>Bacillus_thuringiensis_Al_Hakam_chromosome	NC_002745_T1box7(-)_-_(hom)	0	-	-	-	-	-
Bacillus_cereus_ATCC_10987	|	Candidate_280_NC_003909	|	BCE_4028		cytochrome d ubiquinol oxidase, subunit	*	<<<	110	|	3771076	3771190	<<<	114	|	16	<<<	BCE_4029	peptidase, M20/M25/M40 family	*	candidate	979	2.3e-38	T		5	RNA	Bacillus_anthracis_Ames_chromosome<>Bacillus_anthracis_str_Sterne_chromosome<>Bacillus_thuringiensis_konkukian_chromosome<>Bacillus_anthracis_Ames_0581_chromosome<>Bacillus_thuringiensis_Al_Hakam_chromosome	NC_002745_sprC(-)_-_(hom)	0	-	-	-	-	-
Bacillus_cereus_ATCC_10987	|	Candidate_288_NC_003909	|	BCE_4211		hypothetical protein	*	>>>	123	|	3927903	3928244	>>>	341	|	218	>>>	BCE_4212	magnesium-translocating P-type ATPase	*	candidate	744	3.3e-28	T		7	RNA	Bacillus_halodurans_chromosome<>Clostridium_acetobutylicum_chromosome<>Bacillus_anthracis_Ames_chromosome<>Bacillus_anthracis_str_Sterne_chromosome<>Bacillus_thuringiensis_konkukian_chromosome<>Bacillus_anthracis_Ames_0581_chromosome<>Bacillus_thuringiensis_Al_Hakam_chromosome	NC_000964_ykoK(+)_+_(hom)|NC_003210_ykoK(-)_-_(hom)|NC_002505_ykoK(+)_+_(hom)	0	-	ykoK_NC_003210|3'(0)	-	-	-
Bacillus_cereus_ATCC_10987	|	Candidate_294_NC_003909	|	BCE_4394		chaperone protein dnaJ	*	<<<	134	|	4076068	4076137	<<<	69	|	0	<<<	BCE_4395	molecular chaperone DnaK	*	candidate	750	7.7e-28	T		5	RNA	Bacillus_anthracis_Ames_chromosome<>Bacillus_anthracis_str_Sterne_chromosome<>Bacillus_thuringiensis_konkukian_chromosome<>Bacillus_anthracis_Ames_0581_chromosome<>Bacillus_thuringiensis_Al_Hakam_chromosome	NC_000964_SurC(+)_+_(hom)	0	-	tpke11_NC_000913|UD(5'(0-0)|3'(0-0))	3	-	-
Bacillus_cereus_ATCC_10987	|	Candidate_301_NC_003909	|	BCE_4703		hypothetical protein	*	<<<	313	|	4356835	4356990	<<<	155	|	0	<<<	BCE_4704	50S ribosomal protein L20	*	candidate	1926	2.1e-81	T		5	RNA	Bacillus_anthracis_Ames_chromosome<>Bacillus_anthracis_str_Sterne_chromosome<>Bacillus_thuringiensis_konkukian_chromosome<>Bacillus_anthracis_Ames_0581_chromosome<>Bacillus_thuringiensis_Al_Hakam_chromosome	NC_000964_SR1(+)_+_(hom)	0	-	-	-	-	-
Bacillus_cereus_ATCC_10987	|	Candidate_314_NC_003909	|	BCE_4950		cytochrome d ubiquinol oxidase, subunit II	*	>>>	4	|	4568819	4568980	<<<	161	|	0	<<<	BCE_4951	spore germination protein GerPF-like protein	*	candidate	776	4.9e-29	B		5	RNA	Bacillus_anthracis_Ames_chromosome<>Bacillus_anthracis_str_Sterne_chromosome<>Bacillus_thuringiensis_konkukian_chromosome<>Bacillus_anthracis_Ames_0581_chromosome<>Bacillus_thuringiensis_Al_Hakam_chromosome	NC_000964_Purine5(+)_+_(hom|rev)	0	-	-	-	-	-
Bacillus_cereus_ATCC_10987	|	Candidate_324_NC_003909	|	BCE_5052		hypothetical protein	*	>>>	1	|	4671593	4671849	>>>	256	|	89	>>>	BCE_5053	glycyl-tRNA synthetase	*	candidate	1708	1.9e-71	T		3	-	Bacillus_anthracis_str_Sterne_chromosome<>Bacillus_thuringiensis_konkukian_chromosome<>Bacillus_thuringiensis_Al_Hakam_chromosome	NC_000964_T1box7(-)_-_(hom)|NC_003210_T1box2(-)_-_(hom)|NC_002745_T1box7(-)_-_(hom)	0	-	-	-	-	-
Bacillus_cereus_ATCC_10987	|	Candidate_326_NC_003909	|	BCE_5074		diaminopimelate epimerase	*	<<<	131	|	4691859	4691968	<<<	109	|	0	<<<	BCE_5075	hypothetical protein	*	candidate	1072	1.2e-42	T		5	RNA	Bacillus_anthracis_Ames_chromosome<>Bacillus_anthracis_str_Sterne_chromosome<>Bacillus_thuringiensis_konkukian_chromosome<>Bacillus_anthracis_Ames_0581_chromosome<>Bacillus_thuringiensis_Al_Hakam_chromosome	NC_005072_yfr6(-)_-_(hom)	2	Candidate_315_NC_003909(para),Candidate_316_NC_003909(para)	-	-	-	-
Bacillus_cereus_ATCC_10987	|	Candidate_338_NC_003909	|	BCE_5211		tyrosyl-tRNA synthetase	*	<<<	30	|	4810579	4810911	<<<	332	|	0	<<<	BCE_5212	UDP-N-acetylenolpyruvoylglucosamine reductase	*	candidate	1734	1.2e-72	B		5	-	Bacillus_anthracis_Ames_chromosome<>Bacillus_anthracis_str_Sterne_chromosome<>Bacillus_thuringiensis_konkukian_chromosome<>Bacillus_anthracis_Ames_0581_chromosome<>Bacillus_thuringiensis_Al_Hakam_chromosome	NC_002745_T1box8(-)_-_(hom)|NC_002745_T1box1(+)_+_(hom)	1	Candidate_380_NC_003909(para)	T1box7_NC_003210|3'(0),T1box9_NC_002745|3'(0),T1box13_NC_000964|3'(0)	-	-	-B.subtilis_sigG_1(8.74|-298)B.subtilis_sigA_2(12.5|-255)
Bacillus_cereus_ATCC_10987	|	Candidate_339_NC_003909	|	BCE_5228		hypothetical protein	*	<<<	362	|	4825200	4825369	<<<	169	|	4	<<<	BCE_5229	hypothetical protein	*	candidate	536	2.2e-18	T		3	RNA	Bacillus_anthracis_Ames_chromosome<>Bacillus_anthracis_str_Sterne_chromosome<>Bacillus_anthracis_Ames_0581_chromosome	NC_003210_rliF(-)_-_(hom|rev)	1	Candidate_158_NC_003909(para)	-	-	-	-Multi_Fur(11.32|-146)B.subtilis_sigG_2(8.66|-133)B.subtilis_sigG_3(8.39|-130)B.subtilis_sigG_3(8.16|-224)B.subtilis_sigA_3(11.61|-134)
Bacillus_cereus_ATCC_10987	|	Candidate_376_NC_003909	|	BCE_0012		glutamine amidotransferase, SNO family	*	>>>	61	|	20074	20310	>>>	236	|	29	>>>	BCE_0013	seryl-tRNA synthetase	*	candidate	197	3.7e-16	Z		7	RNA	Bacillus_halodurans_chromosome<>Bacillus_anthracis_Ames_chromosome<>Oceanobacillus_iheyensis_chromosome<>Bacillus_anthracis_str_Sterne_chromosome<>Bacillus_thuringiensis_konkukian_chromosome<>Bacillus_anthracis_Ames_0581_chromosome<>Bacillus_thuringiensis_Al_Hakam_chromosome	NC_000964_T1box1(+)_+_(hom)|NC_003210_T1box14(-)_-_(hom)|NC_002745_T1box1(+)_+_(hom)|NC_003210_T1box12(+)_+_(hom)|NC_003210_T1box7(-)_-_(hom)|NC_000964_T1box2(+)_+_(hom)|NC_003210_T1box2(-)_-_(hom)|NC_000964_T1box9(-)_-_(hom)|NC_000964_T1box7(-)_-_(hom)	5	T-box_NC_003909(para),T-box_NC_003909(para),T-box_NC_003909(para),Candidate_9_NC_003909(para),T-box_NC_003909(para)	T1box1_NC_000964|UD(5'(0-0)|3'(1-1)),T1box14_NC_003210|3'(0),T1box1_NC_002745|3'(0)	5	RS	-
Bacillus_cereus_ATCC_10987	|	Candidate_380_NC_003909	|	BCE_2240		hypothetical protein	*	>>>	31	|	2143906	2144233	>>>	327	|	32	>>>	BCE_2241	isoleucyl-tRNA synthetase	*	candidate	231	7.6e-25	Z		6	RNA	Bacillus_anthracis_Ames_chromosome<>Clostridium_tetani_E88_chromosome<>Bacillus_anthracis_str_Sterne_chromosome<>Bacillus_thuringiensis_konkukian_chromosome<>Bacillus_anthracis_Ames_0581_chromosome<>Bacillus_thuringiensis_Al_Hakam_chromosome	NC_000964_T1box2(+)_+_(hom)	3	T-box_NC_003909(para),Candidate_338_NC_003909(para),T-box_NC_003909(para)	T1box4_NC_002745|3'(0),T1box5_NC_000964|3'(0),T1box5_NC_003210|3'(0)	5	RS	-B.subtilis_sigA_3(11.63|-277)
Bacillus_cereus_ATCC_10987	|	Candidate_382_NC_003909	|	BCE_0215		oligopeptide ABC transporter,	*	<<<	1	|	225016	225404	>>>	388	|	1	<<<	BCE_0216	oxidoreductase, aldo/keto reductase family	*	candidate	1759	8.3e-74	X		5	RNA	Bacillus_anthracis_Ames_chromosome<>Bacillus_anthracis_str_Sterne_chromosome<>Bacillus_thuringiensis_konkukian_chromosome<>Bacillus_anthracis_Ames_0581_chromosome<>Bacillus_thuringiensis_Al_Hakam_chromosome	NC_003210_S_box6(-)_-_(hom|rev)|NC_000964_S_box9(-)_-_(hom|rev)|NC_003210_S_box3(-)_-_(hom|rev)|NC_000964_S_box11(+)_+_(hom|rev)|NC_000964_S_box7(-)_-_(hom|rev)|NC_002745_S_box3(-)_-_(hom|rev)|NC_002745_S_box4(-)_-_(hom|rev)|NC_000964_S_box10(+)_+_(hom|rev)|NC_003210_S_box2(-)_-_(hom|rev)|NC_000964_S_box1(-)_-_(hom|rev)	7	SAM_NC_003909(anti),SAM_NC_003909(para),SAM_NC_003909(para),SAM_NC_003909(para),SAM_NC_003909(para),SAM_NC_003909(para),Candidate_74_NC_003909(para),SAM_NC_003909(para)	-	-	-	-B.subtilis_sigA_3(9.5|-437)
Bacillus_cereus_ATCC_10987	|	Candidate_392_NC_003909	|	BCE_0235		hypothetical protein	*	>>>	1	|	238837	239285	>>>	448	|	123	>>>	BCE_0236	hypothetical protein	*	candidate	2515	3.3e-108	X		5	RNA	Bacillus_anthracis_Ames_chromosome<>Bacillus_anthracis_str_Sterne_chromosome<>Bacillus_thuringiensis_konkukian_chromosome<>Bacillus_anthracis_Ames_0581_chromosome<>Bacillus_thuringiensis_Al_Hakam_chromosome	NC_002745_sprF(+)_+_(hom|rev)	0	-	-	-	-	-B.subtilis_sigG_2(8.42|-269)
Bacillus_cereus_ATCC_10987	|	Candidate_434_NC_003909	|	BCE_4192		hypothetical protein	*	>>>	1	|	3908884	3908986	>>>	102	|	143	>>>	BCE_4193	Na+/H+ antiporter NhaC	*	candidate	1147	2.4e-46	Z		5	RNA	Bacillus_anthracis_Ames_chromosome<>Bacillus_anthracis_str_Sterne_chromosome<>Bacillus_thuringiensis_konkukian_chromosome<>Bacillus_anthracis_Ames_0581_chromosome<>Bacillus_thuringiensis_Al_Hakam_chromosome	NC_000964_T1box13(-)_-_(hom)|NC_003210_T1box7(-)_-_(hom)|NC_002745_T1box7(-)_-_(hom)|NC_002745_T1box8(-)_-_(hom)	4	T-box_NC_003909(para),T-box_NC_003909(para),T-box_NC_003909(para),T-box_NC_003909(para)	-	-	-	-
Bacillus_cereus_ATCC_10987	|	Candidate_435_NC_003909	|	BCE_4231		cell division protein, FtsW/RodA/SpoVE family	*	<<<	19	|	3943825	3944146	>>>	321	|	0	<<<	BCE_4232	dihydrolipoamide acetyltransferase	*	candidate	1588	5.3e-66	X		5	RNA	Bacillus_anthracis_Ames_chromosome<>Bacillus_anthracis_str_Sterne_chromosome<>Bacillus_thuringiensis_konkukian_chromosome<>Bacillus_anthracis_Ames_0581_chromosome<>Bacillus_thuringiensis_Al_Hakam_chromosome	NC_002745_sprC(-)_-_(hom|rev)	1	Candidate_442_NC_003909(para)	-	-	-	-
Bacillus_cereus_ATCC_10987	|	Candidate_467_NC_003909	|	BCE_5354		nucleoside transporter, NupC family	*	>>>	5	|	4941781	4942023	<<<	242	|	29	>>>	BCE_5355	hypothetical protein	*	candidate	972	4.6e-38	F		5	RNA	Bacillus_anthracis_Ames_chromosome<>Bacillus_anthracis_str_Sterne_chromosome<>Bacillus_thuringiensis_konkukian_chromosome<>Bacillus_anthracis_Ames_0581_chromosome<>Bacillus_thuringiensis_Al_Hakam_chromosome	NC_000964_Purine5(+)_+_(hom|rev)	1	Candidate_40_NC_003909(para)	-	-	-	-B.subtilis_sigA_1(9.99|-278)
Bacillus_cereus_ATCC_10987	|	TPP_NC_003909	|	BCE_0794		peptidase, M23/M37 family	*	<<<	1	|	828509	828927	>>>	418	|	207	>>>	BCE_0795	transcriptional activator TenA, putative	*	TPP	2952	6.8e-128	R		5	RNA	Bacillus_anthracis_Ames_chromosome<>Bacillus_anthracis_str_Sterne_chromosome<>Bacillus_thuringiensis_konkukian_chromosome<>Bacillus_anthracis_Ames_0581_chromosome<>Bacillus_thuringiensis_Al_Hakam_chromosome	NC_002745_THI1(-)_-_(hom)|NC_000913_THI1(-)_-_(hom)	2	TPP_NC_003909(para),TPP_NC_003909(para)	THI2_NC_000964|3'(0),THI1_NC_000964|3'(0),THI1_NC_002505|3'(0),THI2_NC_000913|3'(0),THI_NC_002516|3'(0),THI1_NC_003112|3'(0),THI_NC_005072|3'(0)	-	-	-
Bacillus_cereus_ATCC_10987	|	FMN_NC_003909	|	BCE_1605		hypothetical protein	*	<<<	204	|	1576702	1576964	>>>	262	|	80	>>>	BCE_1606	hypothetical protein	*	FMN	649	8.2e-24	R		7	-	Bacillus_anthracis_Ames_chromosome<>Bacillus_anthracis_str_Sterne_chromosome<>Bacillus_thuringiensis_konkukian_chromosome<>Bacillus_licheniformis_ATCC_14580_chromosome<>Bacillus_licheniformis_DSM_13_chromosome<>Bacillus_anthracis_Ames_0581_chromosome<>Bacillus_thuringiensis_Al_Hakam_chromosome	NC_000964_RFN2(-)_-_(hom)|NC_002745_RFN1(-)_-_(hom)|NC_002745_RFN2(-)_-_(hom)|NC_003210_RFN(-)_-_(hom)	0	-	RFN1_NC_000964|3'(0),RFN_NC_003210|3'(0),RFN1_NC_002745|3'(0)	-	-	-B.subtilis_sigG_3(8.04|-229)B.subtilis_sigA_2(10.31|-242)
Bacillus_cereus_ATCC_10987	|	SAM_NC_003909	|	BCE_2666		hypothetical protein	*	<<<	1	|	2536305	2536483	>>>	178	|	94	>>>	BCE_2667	hypothetical protein	*	SAM	1316	8.1e-54	R		5	RNA	Bacillus_anthracis_Ames_chromosome<>Bacillus_anthracis_str_Sterne_chromosome<>Bacillus_thuringiensis_konkukian_chromosome<>Bacillus_anthracis_Ames_0581_chromosome<>Bacillus_thuringiensis_Al_Hakam_chromosome	NC_003210_S_box2(-)_-_(hom)|NC_000964_S_box10(+)_+_(hom)|NC_000964_S_box2(+)_+_(hom)|NC_003210_S_box5(-)_-_(hom)|NC_003210_S_box7(-)_-_(hom)|NC_000964_S_box8(-)_-_(hom)|NC_003210_S_box3(-)_-_(hom)|NC_000964_S_box11(+)_+_(hom)|NC_000964_S_box7(-)_-_(hom)|NC_000964_S_box9(-)_-_(hom)|NC_002745_S_box4(-)_-_(hom)	6	Candidate_74_NC_003909(anti),SAM_NC_003909(para),SAM_NC_003909(para),SAM_NC_003909(para),Candidate_382_NC_003909(para),SAM_NC_003909(para),SAM_NC_003909(para)	S_box2_NC_003210|UD(5'(1-1)|3'(0-0)),S_box5_NC_000964|UD(5'(0-0)|3'(1-1)),S_box9_NC_000964|UD(5'(1-1)|3'(0-0)),S_box7_NC_003210|3'(0),S_box2_NC_002745|3'(0),S_box3_NC_003210|3'(0),T1box2_NC_002745|3'(0)	-	RS	-
Bacillus_cereus_ATCC_10987	|	SRP_bact_NC_003909	|	BCE_0019		cytidine/deoxycytidylate deaminase zinc-binding	*	>>>	81	|	25118	25429	>>>	311	|	83	>>>	BCE_0020	DNA polymerase III subunits gamma and tau	*	SRP_bact	834	4.2e-32	B		57	RNA	Bacillus_subtilis_chromosome<>Bacillus_halodurans_chromosome<>Staphylococcus_aureus_N315_chromosome<>Staphylococcus_aureus_Mu50_chromosome<>Staphylococcus_aureus_COL_chromosome<>Staphylococcus_aureus_aureus_MRSA252_chromosome<>Staphylococcus_aureus_aureus_MSSA476_chromosome<>Listeria_monocytogenes_4b_F2365_chromosome<>Staphylococcus_epidermidis_RP62A_chromosome<>Clostridium_acetobutylicum_chromos…	NC_000964_SRP_bact(+)_+_(hom)|NC_002745_SRP_bact(+)_+_(hom)|NC_003210_SRP_bact(-)_-_(hom)|NC_002516_SRP_bact(+)_+_(hom)|NC_000913_ffs_SRP(+)_+_(hom)|NC_002505_SRP_bact(+)_+_(hom)|NC_003047_SRP_bact(+)_+_(hom)	0	-	SRP_bact_NC_000964|UD(5'(0-0)|3'(0-0))	-	-	-
Bacillus_cereus_ATCC_10987	|	SAM_NC_003909	|	BCE_0215		oligopeptide ABC transporter,	*	<<<	54	|	225069	225404	<<<	335	|	1	<<<	BCE_0216	oxidoreductase, aldo/keto reductase family	*	SAM	1759	8.3e-74	T		5	RNA	Bacillus_anthracis_Ames_chromosome<>Bacillus_anthracis_str_Sterne_chromosome<>Bacillus_thuringiensis_konkukian_chromosome<>Bacillus_anthracis_Ames_0581_chromosome<>Bacillus_thuringiensis_Al_Hakam_chromosome	NC_003210_S_box6(-)_-_(hom)|NC_000964_S_box9(-)_-_(hom)|NC_003210_S_box3(-)_-_(hom)|NC_000964_S_box11(+)_+_(hom)|NC_000964_S_box7(-)_-_(hom)|NC_002745_S_box3(-)_-_(hom)|NC_002745_S_box4(-)_-_(hom)|NC_000964_S_box10(+)_+_(hom)|NC_003210_S_box2(-)_-_(hom)|NC_000964_S_box1(-)_-_(hom)	7	Candidate_382_NC_003909(anti),SAM_NC_003909(para),SAM_NC_003909(para),SAM_NC_003909(para),SAM_NC_003909(para),SAM_NC_003909(para),Candidate_74_NC_003909(para),SAM_NC_003909(para)	S_box2_NC_003210|UD(5'(1-1)|3'(0-0)),S_box5_NC_000964|UD(5'(0-0)|3'(1-1)),S_box9_NC_000964|UD(5'(1-1)|3'(0-0)),S_box7_NC_003210|3'(0),S_box2_NC_002745|3'(0),S_box3_NC_003210|3'(0),T1box2_NC_002745|3'(0)	-	RS	-B.subtilis_sigA_2(10.07|-236)
Bacillus_cereus_ATCC_10987	|	Purine_NC_003909	|	BCE_0290		chaperonin family protein	*	>>>	53	|	294422	294700	>>>	278	|	74	>>>	BCE_0291	bifunctional GMP synthase/glutamine	*	Purine	1706	1.2e-71	T		5	RNA	Bacillus_anthracis_Ames_chromosome<>Bacillus_anthracis_str_Sterne_chromosome<>Bacillus_thuringiensis_konkukian_chromosome<>Bacillus_anthracis_Ames_0581_chromosome<>Bacillus_thuringiensis_Al_Hakam_chromosome	NC_000964_Purine1(-)_-_(hom)|NC_003210_Purine2(-)_-_(hom)	0	-	-	5	-	-
Bacillus_cereus_ATCC_10987	|	TPP_NC_003909	|	BCE_0489		methyl-accepting chemotaxis protein	*	>>>	1	|	506252	506477	>>>	225	|	36	>>>	BCE_0490	hypothetical protein	*	TPP	1270	1.5e-51	B		5	RNA	Bacillus_anthracis_Ames_chromosome<>Bacillus_anthracis_str_Sterne_chromosome<>Bacillus_thuringiensis_konkukian_chromosome<>Bacillus_anthracis_Ames_0581_chromosome<>Bacillus_thuringiensis_Al_Hakam_chromosome	NC_000913_THI1(-)_-_(hom)|NC_000964_THI4(+)_+_(hom)|NC_000964_THI3(-)_-_(hom)|NC_000964_THI1(+)_+_(hom)	3	TPP_NC_003909(para),TPP_NC_003909(para),TPP_NC_003909(para)	THI2_NC_000964|3'(0),THI1_NC_000964|3'(0),THI1_NC_002505|3'(0),THI2_NC_000913|3'(0),THI_NC_002516|3'(0),THI1_NC_003112|3'(0),THI_NC_005072|3'(0)	5	RS	-
Bacillus_cereus_ATCC_10987	|	ydaO-yuaA_NC_003909	|	BCE_0807		hypothetical protein	*	>>>	1	|	837986	838284	>>>	298	|	43	>>>	BCE_0808	hypothetical protein	*	ydaO-yuaA	1605	3.5e-67	B		5	RNA	Bacillus_anthracis_Ames_chromosome<>Bacillus_anthracis_str_Sterne_chromosome<>Bacillus_thuringiensis_konkukian_chromosome<>Bacillus_anthracis_Ames_0581_chromosome<>Bacillus_thuringiensis_Al_Hakam_chromosome	NC_000964_ydaO1yuaA1(+)_+_(hom)|NC_000964_ydaO1yuaA2(+)_+_(hom)	0	-	-	5	-	-
Bacillus_cereus_ATCC_10987	|	T-box_NC_003909	|	BCE_1297		tryptophanyl-tRNA synthetase	*	<<<	50	|	1309644	1309905	<<<	261	|	86	<<<	BCE_1298	hypothetical protein	*	T-box	521	3.6e-18	T		9	RNA	Bacillus_subtilis_chromosome<>Bacillus_anthracis_Ames_chromosome<>Bacillus_anthracis_str_Sterne_chromosome<>Bacillus_thuringiensis_konkukian_chromosome<>Bacillus_licheniformis_ATCC_14580_chromosome<>Bacillus_licheniformis_DSM_13_chromosome<>Bacillus_anthracis_Ames_0581_chromosome<>Bacillus_thuringiensis_Al_Hakam_chromosome<>Bacillus_amyloliquefaciens_FZB42_chromosome	NC_000964_T1box3(-)_-_(hom)|NC_002745_T1box1(+)_+_(hom)|NC_002745_T1box4(+)_+_(hom)|NC_000964_T1box14(-)_-_(hom)|NC_000964_T1box5(+)_+_(hom)|NC_003210_T1box4(-)_-_(hom)|NC_000964_T1box8(-)_-_(hom)|NC_003210_T1box1(+)_+_(hom)|NC_002745_T1box8(-)_-_(hom)|NC_000964_T1box13(-)_-_(hom)	12	T-box_NC_003909(para),T-box_NC_003909(para),T-box_NC_003909(para),T-box_NC_003909(para),T-box_NC_003909(para),T-box_NC_003909(para),T-box_NC_003909(para),Candidate_381_NC_003909(para),T-box_NC_003909(para),T-box_NC_003909(para),T-box_NC_003909(para),T-box_NC_003909(para)	T1box7_NC_003210|UD(5'(0-1)|3'(0-0)),T1box5_NC_000964|UD(5'(0-0)|3'(0-0)),T1box4_NC_002745|UD(5'(0-0)|3'(0-0)),T1box8_NC_000964|UD(5'(1-1)|3'(0-0)),T1box10_NC_000964|UD(5'(1-1)|3'(0-0)),Lysine2_NC_002745|UD(5'(1-1)|3'(1-1)),T1box12_NC_000964|UD(5'(0-0)|3'(0-0)),T1box6_NC_003210|UD(5'(1-0)|3'(0-0)),T1box8_NC_002745|UD(5'(1-0)|3'(0-0)),T1box3_NC_000964|3'(0),T1box12_NC_003210|3'(0),T1box3_NC_003210…	-	RS	-B.subtilis_sigA_1(10.48|-319)
Bacillus_cereus_ATCC_10987	|	T-box_NC_003909	|	BCE_1551		precorrin-2 dehydrogenase	*	>>>	1	|	1525472	1525809	>>>	337	|	82	>>>	BCE_1552	sodium-dependent transporter, putative	*	T-box	2045	9.4e-87	T		5	RNA	Bacillus_anthracis_Ames_chromosome<>Bacillus_anthracis_str_Sterne_chromosome<>Bacillus_thuringiensis_konkukian_chromosome<>Bacillus_anthracis_Ames_0581_chromosome<>Bacillus_thuringiensis_Al_Hakam_chromosome	NC_003210_T1box11(-)_-_(hom)|NC_003210_T1box9(-)_-_(hom)|NC_003210_T1box7(-)_-_(hom)	1	T-box_NC_003909(para)	T1box7_NC_003210|UD(5'(0-1)|3'(0-0)),T1box5_NC_000964|UD(5'(0-0)|3'(0-0)),T1box4_NC_002745|UD(5'(0-0)|3'(0-0)),T1box8_NC_000964|UD(5'(1-1)|3'(0-0)),T1box10_NC_000964|UD(5'(1-1)|3'(0-0)),Lysine2_NC_002745|UD(5'(1-1)|3'(1-1)),T1box12_NC_000964|UD(5'(0-0)|3'(0-0)),T1box6_NC_003210|UD(5'(1-0)|3'(0-0)),T1box8_NC_002745|UD(5'(1-0)|3'(0-0)),T1box3_NC_000964|3'(0),T1box12_NC_003210|3'(0),T1box3_NC_003210…	-	RS	-B.subtilis_sigA_2(11.28|-295)
Bacillus_cereus_ATCC_10987	|	T-box_NC_003909	|	BCE_1879		hypothetical protein	*	>>>	341	|	1814314	1814385	>>>	71	|	47	>>>	BCE_1880	asparagine synthetase AsnA	*	T-box	201	4.1e-17	T		8	RNA	Bacillus_anthracis_str_Sterne_chromosome<>Bacillus_thuringiensis_Al_Hakam_chromosome<>Clostridium_difficile_630_chromosome<>Clostridium_botulinum_A_chromosome<>Alkaliphilus_metalliredigens_QYMF_chromosome<>Clostridium_botulinum_A_ATCC_19397_chromosome<>Clostridium_botulinum_A_Hall_chromosome<>Clostridium_botulinum_F_Langeland_chromosome	NC_000964_T1box2(+)_+_(hom)|NC_000964_T1box14(-)_-_(hom)|NC_002745_T1box3(+)_+_(hom)|NC_003210_T1box5(-)_-_(hom)|NC_000964_T1box5(+)_+_(hom)	4	T-box_NC_003909(para),T-box_NC_003909(para),T-box_NC_003909(para),T-box_NC_003909(para)	T1box7_NC_003210|UD(5'(0-1)|3'(0-0)),T1box5_NC_000964|UD(5'(0-0)|3'(0-0)),T1box4_NC_002745|UD(5'(0-0)|3'(0-0)),T1box8_NC_000964|UD(5'(1-1)|3'(0-0)),T1box10_NC_000964|UD(5'(1-1)|3'(0-0)),Lysine2_NC_002745|UD(5'(1-1)|3'(1-1)),T1box12_NC_000964|UD(5'(0-0)|3'(0-0)),T1box6_NC_003210|UD(5'(1-0)|3'(0-0)),T1box8_NC_002745|UD(5'(1-0)|3'(0-0)),T1box3_NC_000964|3'(0),T1box12_NC_003210|3'(0),T1box3_NC_003210…	5	RS	-
Bacillus_cereus_ATCC_10987	|	T-box_NC_003909	|	BCE_2050		hypothetical protein	*	>>>	232	|	1981262	1981516	>>>	254	|	133	>>>	BCE_2051	homoserine dehydrogenase	*	T-box	510	1.1e-17	T		12	RNA	Bacillus_subtilis_chromosome<>Bacillus_halodurans_chromosome<>Bacillus_anthracis_Ames_chromosome<>Bacillus_anthracis_str_Sterne_chromosome<>Bacillus_thuringiensis_konkukian_chromosome<>Bacillus_licheniformis_ATCC_14580_chromosome<>Bacillus_licheniformis_DSM_13_chromosome<>Geobacillus_kaustophilus_HTA426_chromosome<>Bacillus_clausii_KSM-K16_chromosome<>Bacillus_anthracis_Ames_0581_chromosome<>Baci…	NC_000964_T1box15(-)_-_(hom)|NC_000964_T1box16(-)_-_(hom)|NC_000964_T1box17(-)_-_(hom)|NC_003210_T1box6(-)_-_(hom)|NC_000964_T1box12(-)_-_(hom)|NC_003210_T1box2(-)_-_(hom)	2	T-box_NC_003909(para),T-box_NC_003909(para)	T1box7_NC_003210|UD(5'(0-1)|3'(0-0)),T1box5_NC_000964|UD(5'(0-0)|3'(0-0)),T1box4_NC_002745|UD(5'(0-0)|3'(0-0)),T1box8_NC_000964|UD(5'(1-1)|3'(0-0)),T1box10_NC_000964|UD(5'(1-1)|3'(0-0)),Lysine2_NC_002745|UD(5'(1-1)|3'(1-1)),T1box12_NC_000964|UD(5'(0-0)|3'(0-0)),T1box6_NC_003210|UD(5'(1-0)|3'(0-0)),T1box8_NC_002745|UD(5'(1-0)|3'(0-0)),T1box3_NC_000964|3'(0),T1box12_NC_003210|3'(0),T1box3_NC_003210…	-	-	-B.subtilis_sigA_2(10.06|-274)
Bacillus_cereus_ATCC_10987	|	T-box_NC_003909	|	BCE_2612		hypothetical protein	*	>>>	66	|	2486794	2487084	>>>	290	|	54	>>>	BCE_2613	pseudogene	*	T-box	242	5.3e-23	T		7	RNA	Bacillus_anthracis_Ames_chromosome<>Bacillus_anthracis_str_Sterne_chromosome<>Bacillus_thuringiensis_konkukian_chromosome<>Bacillus_clausii_KSM-K16_chromosome<>Bacillus_anthracis_Ames_0581_chromosome<>Bacillus_thuringiensis_Al_Hakam_chromosome<>Clostridium_beijerinckii_NCIMB_8052_chromosome	NC_003210_T1box10(-)_-_(hom)|NC_000964_T1box9(-)_-_(hom)|NC_002745_T1box2(-)_-_(hom)|NC_003210_T1box13(+)_+_(hom)	2	T-box_NC_003909(para),T-box_NC_003909(para)	T1box7_NC_003210|UD(5'(0-1)|3'(0-0)),T1box5_NC_000964|UD(5'(0-0)|3'(0-0)),T1box4_NC_002745|UD(5'(0-0)|3'(0-0)),T1box8_NC_000964|UD(5'(1-1)|3'(0-0)),T1box10_NC_000964|UD(5'(1-1)|3'(0-0)),Lysine2_NC_002745|UD(5'(1-1)|3'(1-1)),T1box12_NC_000964|UD(5'(0-0)|3'(0-0)),T1box6_NC_003210|UD(5'(1-0)|3'(0-0)),T1box8_NC_002745|UD(5'(1-0)|3'(0-0)),T1box3_NC_000964|3'(0),T1box12_NC_003210|3'(0),T1box3_NC_003210…	5	RS	-B.subtilis_sigA_2(9.11|-302)
Bacillus_cereus_ATCC_10987	|	TPP_NC_003909	|	BCE_2628		D-alanylalanine synthetase	*	>>>	1	|	2504665	2504902	>>>	237	|	64	>>>	BCE_2629	transcriptional activator TenA	*	TPP	1110	2.6e-44	T		5	RNA	Bacillus_anthracis_Ames_chromosome<>Bacillus_anthracis_str_Sterne_chromosome<>Bacillus_thuringiensis_konkukian_chromosome<>Bacillus_anthracis_Ames_0581_chromosome<>Bacillus_thuringiensis_Al_Hakam_chromosome	NC_000964_THI2(+)_+_(hom)|NC_000964_THI1(+)_+_(hom)|NC_003210_THI1(+)_+_(hom)|NC_000964_THI4(+)_+_(hom)|NC_000913_THI1(-)_-_(hom)	3	TPP_NC_003909(para),TPP_NC_003909(para),TPP_NC_003909(para)	THI2_NC_000964|3'(0),THI1_NC_000964|3'(0),THI1_NC_002505|3'(0),THI2_NC_000913|3'(0),THI_NC_002516|3'(0),THI1_NC_003112|3'(0),THI_NC_005072|3'(0)	5	RS	-B.subtilis_sigK_3(9.25|-178)B.subtilis_sigA_1(10.05|-281)B.subtilis_sigA_1(10.93|-188)
Bacillus_cereus_ATCC_10987	|	SAM_NC_003909	|	BCE_3230		amidohydrolase family protein	*	<<<	26	|	3019764	3020002	<<<	238	|	0	<<<	BCE_3231	hypothetical protein	*	SAM	1238	4.2e-50	B		5	RNA	Bacillus_anthracis_Ames_chromosome<>Bacillus_anthracis_str_Sterne_chromosome<>Bacillus_thuringiensis_konkukian_chromosome<>Bacillus_anthracis_Ames_0581_chromosome<>Bacillus_thuringiensis_Al_Hakam_chromosome	NC_000964_S_box7(-)_-_(hom)|NC_003210_S_box3(-)_-_(hom)|NC_000964_S_box10(+)_+_(hom)|NC_000964_S_box2(+)_+_(hom)|NC_000964_S_box11(+)_+_(hom)|NC_003210_S_box6(-)_-_(hom)|NC_000964_S_box9(-)_-_(hom)|NC_002745_S_box3(-)_-_(hom)|NC_002745_S_box4(-)_-_(hom)|NC_000964_S_box3(-)_-_(hom)|NC_000964_S_box1(-)_-_(hom)|NC_003210_S_box2(-)_-_(hom)	8	Candidate_382_NC_003909(para),SAM_NC_003909(para),SAM_NC_003909(para),SAM_NC_003909(para),SAM_NC_003909(para),SAM_NC_003909(para),Candidate_74_NC_003909(para),SAM_NC_003909(para)	S_box2_NC_003210|UD(5'(1-1)|3'(0-0)),S_box5_NC_000964|UD(5'(0-0)|3'(1-1)),S_box9_NC_000964|UD(5'(1-1)|3'(0-0)),S_box7_NC_003210|3'(0),S_box2_NC_002745|3'(0),S_box3_NC_003210|3'(0),T1box2_NC_002745|3'(0)	5	RS	-B.subtilis_sigA_2(10.05|-193)
Bacillus_cereus_ATCC_10987	|	T-box_NC_003909	|	BCE_3376		tryptophanyl-tRNA synthetase	*	<<<	37	|	3157045	3157153	<<<	108	|	0	<<<	BCE_3377	hypothetical protein	*	T-box	561	1.1e-19	B		4	RNA	Bacillus_anthracis_Ames_chromosome<>Bacillus_anthracis_str_Sterne_chromosome<>Bacillus_thuringiensis_konkukian_chromosome<>Bacillus_anthracis_Ames_0581_chromosome	NC_003210_T1box1(+)_+_(hom)|NC_000964_T1box1(+)_+_(hom)|NC_000964_T1box2(+)_+_(hom)|NC_003210_T1box5(-)_-_(hom)|NC_000964_T1box6(+)_+_(hom)|NC_000964_T1box10(-)_-_(hom)|NC_002745_T1box7(-)_-_(hom)|NC_000964_T1box4(+)_+_(hom)|NC_000964_T1box14(-)_-_(hom)|NC_000964_T1box13(-)_-_(hom)|NC_003210_T1box9(-)_-_(hom)|NC_002745_T1box5(+)_+_(hom)|NC_000964_T1box18(+)_+_(hom)|NC_000964_T1box8(-)_-_(hom)|NC_…	11	T-box_NC_003909(para),Candidate_381_NC_003909(para),T-box_NC_003909(para),T-box_NC_003909(para),T-box_NC_003909(para),T-box_NC_003909(para),T-box_NC_003909(para),T-box_NC_003909(para),T-box_NC_003909(para),T-box_NC_003909(para),T-box_NC_003909(para)	T1box7_NC_003210|UD(5'(0-1)|3'(0-0)),T1box5_NC_000964|UD(5'(0-0)|3'(0-0)),T1box4_NC_002745|UD(5'(0-0)|3'(0-0)),T1box8_NC_000964|UD(5'(1-1)|3'(0-0)),T1box10_NC_000964|UD(5'(1-1)|3'(0-0)),Lysine2_NC_002745|UD(5'(1-1)|3'(1-1)),T1box12_NC_000964|UD(5'(0-0)|3'(0-0)),T1box6_NC_003210|UD(5'(1-0)|3'(0-0)),T1box8_NC_002745|UD(5'(1-0)|3'(0-0)),T1box3_NC_000964|3'(0),T1box12_NC_003210|3'(0),T1box3_NC_003210…	-	RS	-
Bacillus_cereus_ATCC_10987	|	SAM_NC_003909	|	BCE_3547		amino acid ABC transproter permease protein	*	<<<	20	|	3299012	3299297	<<<	285	|	247	<<<	BCE_3548	VanW-related protein	*	SAM	480	3e-16	T		1	RNA	Oceanobacillus_iheyensis_chromosome	NC_000964_S_box11(+)_+_(hom)|NC_000964_S_box2(+)_+_(hom)|NC_000964_S_box10(+)_+_(hom)|NC_003210_S_box3(-)_-_(hom)|NC_003210_S_box6(-)_-_(hom)|NC_000964_S_box7(-)_-_(hom)|NC_000964_S_box1(-)_-_(hom)|NC_002745_S_box4(-)_-_(hom)	13	Candidate_308_NC_003909(para),Candidate_263_NC_003909(para),Candidate_167_NC_003909(para),Candidate_448_NC_003909(para),Candidate_205_NC_003909(para),Candidate_325_NC_003909(para),Candidate_437_NC_003909(para),SAM_NC_003909(para),Candidate_382_NC_003909(para),SAM_NC_003909(para),SAM_NC_003909(para),SAM_NC_003909(para),Candidate_207_NC_003909(para)	S_box2_NC_003210|UD(5'(1-1)|3'(0-0)),S_box5_NC_000964|UD(5'(0-0)|3'(1-1)),S_box9_NC_000964|UD(5'(1-1)|3'(0-0)),S_box7_NC_003210|3'(0),S_box2_NC_002745|3'(0),S_box3_NC_003210|3'(0),T1box2_NC_002745|3'(0)	5	RS	-
Bacillus_cereus_ATCC_10987	|	T-box_NC_003909	|	BCE_3940		isoleucyl-tRNA synthetase	*	<<<	48	|	3694085	3694383	<<<	298	|	0	<<<	BCE_3941	cell-division initiation protein DivIVA	*	T-box	1705	2.6e-71	T		5	RNA	Bacillus_anthracis_Ames_chromosome<>Bacillus_anthracis_str_Sterne_chromosome<>Bacillus_thuringiensis_konkukian_chromosome<>Bacillus_anthracis_Ames_0581_chromosome<>Bacillus_thuringiensis_Al_Hakam_chromosome	NC_000964_T1box5(+)_+_(hom)|NC_003210_T1box1(+)_+_(hom)|NC_003210_T1box4(-)_-_(hom)|NC_000964_T1box14(-)_-_(hom)|NC_000964_T1box10(-)_-_(hom)|NC_000964_T1box7(-)_-_(hom)|NC_002745_T1box7(-)_-_(hom)|NC_000964_T1box18(+)_+_(hom)|NC_000964_T1box13(-)_-_(hom)|NC_002745_T1box8(-)_-_(hom)|NC_003210_T1box13(+)_+_(hom)	10	T-box_NC_003909(para),T-box_NC_003909(para),T-box_NC_003909(para),T-box_NC_003909(para),T-box_NC_003909(para),T-box_NC_003909(para),T-box_NC_003909(para),T-box_NC_003909(para),T-box_NC_003909(para),T-box_NC_003909(para)	T1box7_NC_003210|UD(5'(0-1)|3'(0-0)),T1box5_NC_000964|UD(5'(0-0)|3'(0-0)),T1box4_NC_002745|UD(5'(0-0)|3'(0-0)),T1box8_NC_000964|UD(5'(1-1)|3'(0-0)),T1box10_NC_000964|UD(5'(1-1)|3'(0-0)),Lysine2_NC_002745|UD(5'(1-1)|3'(1-1)),T1box12_NC_000964|UD(5'(0-0)|3'(0-0)),T1box6_NC_003210|UD(5'(1-0)|3'(0-0)),T1box8_NC_002745|UD(5'(1-0)|3'(0-0)),T1box3_NC_000964|3'(0),T1box12_NC_003210|3'(0),T1box3_NC_003210…	-	RS	-B.subtilis_sigA_2(10.84|-268)
Bacillus_cereus_ATCC_10987	|	SAM_NC_003909	|	BCE_4102		hypothetical protein	*	>>>	1	|	3835984	3836193	>>>	209	|	23	>>>	BCE_4103	ribulose bisphosphate carboxylase, putative	*	SAM	1150	4.3e-46	T		5	RNA	Bacillus_anthracis_Ames_chromosome<>Bacillus_anthracis_str_Sterne_chromosome<>Bacillus_thuringiensis_konkukian_chromosome<>Bacillus_anthracis_Ames_0581_chromosome<>Bacillus_thuringiensis_Al_Hakam_chromosome	NC_000964_S_box5(+)_+_(hom)|NC_000964_S_box11(+)_+_(hom)|NC_000964_S_box9(-)_-_(hom)|NC_000964_S_box10(+)_+_(hom)|NC_003210_S_box3(-)_-_(hom)|NC_003210_S_box6(-)_-_(hom)|NC_002745_S_box2(+)_+_(hom)|NC_003210_S_box1(+)_+_(hom)|NC_000964_S_box7(-)_-_(hom)|NC_002745_S_box4(-)_-_(hom)|NC_000964_S_box1(-)_-_(hom)|NC_003210_S_box4(+)_+_(hom)	6	SAM_NC_003909(para),SAM_NC_003909(para),SAM_NC_003909(para),SAM_NC_003909(para),Candidate_382_NC_003909(para),SAM_NC_003909(para)	S_box2_NC_003210|UD(5'(1-1)|3'(0-0)),S_box5_NC_000964|UD(5'(0-0)|3'(1-1)),S_box9_NC_000964|UD(5'(1-1)|3'(0-0)),S_box7_NC_003210|3'(0),S_box2_NC_002745|3'(0),S_box3_NC_003210|3'(0),T1box2_NC_002745|3'(0)	5	RS	-
Bacillus_cereus_ATCC_10987	|	T-box_NC_003909	|	BCE_4486		histidyl-tRNA synthetase	*	<<<	41	|	4157873	4158136	<<<	263	|	49	<<<	BCE_4487	hypothetical protein	*	T-box	480	5e-16	T		8	RNA	Bacillus_subtilis_chromosome<>Bacillus_halodurans_chromosome<>Bacillus_anthracis_Ames_chromosome<>Bacillus_anthracis_str_Sterne_chromosome<>Bacillus_thuringiensis_konkukian_chromosome<>Geobacillus_kaustophilus_HTA426_chromosome<>Bacillus_anthracis_Ames_0581_chromosome<>Geobacillus_thermodenitrificans_NG80-2_chromosome	NC_000964_T1box9(-)_-_(hom)|NC_003210_T1box4(-)_-_(hom)|NC_000964_T1box13(-)_-_(hom)|NC_003210_T1box12(+)_+_(hom)|NC_000964_T1box7(-)_-_(hom)|NC_000964_T1box14(-)_-_(hom)	3	T-box_NC_003909(para),T-box_NC_003909(para),T-box_NC_003909(para)	T1box7_NC_003210|UD(5'(0-1)|3'(0-0)),T1box5_NC_000964|UD(5'(0-0)|3'(0-0)),T1box4_NC_002745|UD(5'(0-0)|3'(0-0)),T1box8_NC_000964|UD(5'(1-1)|3'(0-0)),T1box10_NC_000964|UD(5'(1-1)|3'(0-0)),Lysine2_NC_002745|UD(5'(1-1)|3'(1-1)),T1box12_NC_000964|UD(5'(0-0)|3'(0-0)),T1box6_NC_003210|UD(5'(1-0)|3'(0-0)),T1box8_NC_002745|UD(5'(1-0)|3'(0-0)),T1box3_NC_000964|3'(0),T1box12_NC_003210|3'(0),T1box3_NC_003210…	-	RS	-B.subtilis_sigA_2(10.32|-279)
Bacillus_cereus_ATCC_10987	|	T-box_NC_003909	|	BCE_4685		asparaginyl-tRNA synthetase	*	<<<	35	|	4341452	4341752	<<<	300	|	121	<<<	BCE_4686	phenylalanyl-tRNA synthetase beta subunit	*	T-box	572	2.3e-20	T		12	RNA	Bacillus_anthracis_Ames_chromosome<>Clostridium_tetani_E88_chromosome<>Bacillus_anthracis_str_Sterne_chromosome<>Bacillus_thuringiensis_konkukian_chromosome<>Bacillus_anthracis_Ames_0581_chromosome<>Bacillus_thuringiensis_Al_Hakam_chromosome<>Clostridium_botulinum_A_chromosome<>Alkaliphilus_metalliredigens_QYMF_chromosome<>Clostridium_botulinum_A_ATCC_19397_chromosome<>Clostridium_botulinum_A_Hal…	NC_000964_T1box5(+)_+_(hom)|NC_000964_T1box18(+)_+_(hom)|NC_002745_T1box7(-)_-_(hom)|NC_003210_T1box5(-)_-_(hom)|NC_000964_T1box6(+)_+_(hom)|NC_000964_T1box13(-)_-_(hom)|NC_003210_T1box3(-)_-_(hom)|NC_002745_T1box2(-)_-_(hom)	5	T-box_NC_003909(para),T-box_NC_003909(para),Candidate_62_NC_003909(para),Candidate_381_NC_003909(para),T-box_NC_003909(para)	T1box7_NC_003210|UD(5'(0-1)|3'(0-0)),T1box5_NC_000964|UD(5'(0-0)|3'(0-0)),T1box4_NC_002745|UD(5'(0-0)|3'(0-0)),T1box8_NC_000964|UD(5'(1-1)|3'(0-0)),T1box10_NC_000964|UD(5'(1-1)|3'(0-0)),Lysine2_NC_002745|UD(5'(1-1)|3'(1-1)),T1box12_NC_000964|UD(5'(0-0)|3'(0-0)),T1box6_NC_003210|UD(5'(1-0)|3'(0-0)),T1box8_NC_002745|UD(5'(1-0)|3'(0-0)),T1box3_NC_000964|3'(0),T1box12_NC_003210|3'(0),T1box3_NC_003210…	-	RS	-
Bacillus_cereus_ATCC_10987	|	SAM_NC_003909	|	BCE_5125		ABC transporter, ATP-binding protein	*	<<<	114	|	4732395	4732643	<<<	248	|	50	<<<	BCE_5126	hypothetical protein	*	SAM	423	2e-18	B		7	RNA	Bacillus_halodurans_chromosome<>Bacillus_anthracis_Ames_chromosome<>Bacillus_anthracis_str_Sterne_chromosome<>Bacillus_thuringiensis_konkukian_chromosome<>Bacillus_anthracis_Ames_0581_chromosome<>Bacillus_thuringiensis_Al_Hakam_chromosome<>Geobacillus_thermodenitrificans_NG80-2_chromosome	NC_000964_S_box9(-)_-_(hom)|NC_003210_S_box2(-)_-_(hom)|NC_000964_S_box11(+)_+_(hom)|NC_002745_S_box2(+)_+_(hom)|NC_000964_S_box10(+)_+_(hom)|NC_000964_S_box6(+)_+_(hom)|NC_002745_S_box3(-)_-_(hom)|NC_000964_S_box2(+)_+_(hom)|NC_000964_S_box7(-)_-_(hom)|NC_003210_S_box3(-)_-_(hom)|NC_000964_S_box5(+)_+_(hom)|NC_003210_S_box1(+)_+_(hom)|NC_000964_S_box3(-)_-_(hom)	9	Candidate_382_NC_003909(para),SAM_NC_003909(para),SAM_NC_003909(para),SAM_NC_003909(para),SAM_NC_003909(para),SAM_NC_003909(para),Candidate_74_NC_003909(para),SAM_NC_003909(para),Candidate_194_NC_003909(para)	S_box2_NC_003210|UD(5'(1-1)|3'(0-0)),S_box5_NC_000964|UD(5'(0-0)|3'(1-1)),S_box9_NC_000964|UD(5'(1-1)|3'(0-0)),S_box7_NC_003210|3'(0),S_box2_NC_002745|3'(0),S_box3_NC_003210|3'(0),T1box2_NC_002745|3'(0)	-	-	-B.subtilis_sigA_2(11.58|-236)
Bacillus_cereus_ATCC_10987	|	TPP_NC_003909	|	BCE_5341		thiamine biosynthesis protein ThiC	*	<<<	58	|	4930749	4930990	<<<	241	|	0	<<<	BCE_5342	L-lactate permease	*	TPP	1467	1.7e-60	T		5	RNA	Bacillus_anthracis_Ames_chromosome<>Bacillus_anthracis_str_Sterne_chromosome<>Bacillus_thuringiensis_konkukian_chromosome<>Bacillus_anthracis_Ames_0581_chromosome<>Bacillus_thuringiensis_Al_Hakam_chromosome	NC_000964_THI1(+)_+_(hom)|NC_000964_THI2(+)_+_(hom)|NC_000964_THI4(+)_+_(hom)|NC_003210_THI1(+)_+_(hom)|NC_000913_THI1(-)_-_(hom)	3	TPP_NC_003909(para),TPP_NC_003909(para),TPP_NC_003909(para)	THI2_NC_000964|3'(0),THI1_NC_000964|3'(0),THI1_NC_002505|3'(0),THI2_NC_000913|3'(0),THI_NC_002516|3'(0),THI1_NC_003112|3'(0),THI_NC_005072|3'(0)	-	RS	-
Bacillus_cereus_ATCC_10987	|	SAM_NC_003909	|	BCE_5535		O-acetylhomoserine sulfhydrylase	*	<<<	29	|	5120209	5120281	<<<	72	|	0	<<<	BCE_5536	hypothetical protein	*	SAM	487	2e-16	T		5	RNA	Bacillus_anthracis_Ames_chromosome<>Bacillus_anthracis_str_Sterne_chromosome<>Bacillus_thuringiensis_konkukian_chromosome<>Bacillus_anthracis_Ames_0581_chromosome<>Bacillus_thuringiensis_Al_Hakam_chromosome	NC_000964_T1box13(-)_-_(hom)	0	-	S_box2_NC_003210|UD(5'(1-1)|3'(0-0)),S_box5_NC_000964|UD(5'(0-0)|3'(1-1)),S_box9_NC_000964|UD(5'(1-1)|3'(0-0)),S_box7_NC_003210|3'(0),S_box2_NC_002745|3'(0),S_box3_NC_003210|3'(0),T1box2_NC_002745|3'(0)	53	-	-B.subtilis_sigA_2(11.63|-185)
Bacillus_cereus_ATCC_10987	|	yybP-ykoY_NC_003909	|	BCE_1422		hypothetical protein	*	<<<	109	|	1425363	1425546	<<<	183	|	0	<<<	BCE_1423	potassium uptake protein, TrkH family	*	yybP-ykoY	780	3.4e-29	Z		5	RNA	Bacillus_anthracis_Ames_chromosome<>Bacillus_anthracis_str_Sterne_chromosome<>Bacillus_thuringiensis_konkukian_chromosome<>Bacillus_anthracis_Ames_0581_chromosome<>Bacillus_thuringiensis_Al_Hakam_chromosome	NC_003210_yybP1ykoY(+)_+_(hom)	0	-	yybP1ykoY_NC_003210|3'(0),yybP1ykoY1_NC_000964|3'(0),yybP1ykoY_NC_002745|3'(0)	-	-	-B.subtilis_sigA_2(12.5|-159)
Bacillus_cereus_ATCC_10987	|	T-box_NC_003909	|	BCE_1565		branched-chain amino acid transport system II	*	<<<	39	|	1538446	1538804	<<<	358	|	188	>>>	BCE_1566	hypothetical protein	*	T-box	668	1.3e-24	X		1	RNA	Clostridium_tetani_E88_chromosome	NC_003210_T1box4(-)_-_(hom)	5	Candidate_9_NC_003909(anti),Candidate_380_NC_003909(para),Candidate_376_NC_003909(para),T-box_NC_003909(para),T-box_NC_003909(para),T-box_NC_003909(para)	T1box7_NC_003210|UD(5'(0-1)|3'(0-0)),T1box5_NC_000964|UD(5'(0-0)|3'(0-0)),T1box4_NC_002745|UD(5'(0-0)|3'(0-0)),T1box8_NC_000964|UD(5'(1-1)|3'(0-0)),T1box10_NC_000964|UD(5'(1-1)|3'(0-0)),Lysine2_NC_002745|UD(5'(1-1)|3'(1-1)),T1box12_NC_000964|UD(5'(0-0)|3'(0-0)),T1box6_NC_003210|UD(5'(1-0)|3'(0-0)),T1box8_NC_002745|UD(5'(1-0)|3'(0-0)),T1box3_NC_000964|3'(0),T1box12_NC_003210|3'(0),T1box3_NC_003210…	-	RS	-B.subtilis_sigG_1(9.66|-325)
Bacillus_cereus_ATCC_10987	|	RNaseP_bact_b_NC_003909	|	BCE_1689		hypothetical protein	*	>>>	459	|	1643607	1643683	>>>	76	|	116	>>>	BCE_1690	hypothetical protein	*	RNaseP_bact_b	150	1.6e-35	Z		35	RNA	Bacillus_halodurans_chromosome<>Staphylococcus_aureus_COL_chromosome<>Staphylococcus_aureus_aureus_MRSA252_chromosome<>Staphylococcus_aureus_aureus_MSSA476_chromosome<>Staphylococcus_epidermidis_RP62A_chromosome<>Streptococcus_pneumoniae_TIGR4_chromosome<>Streptococcus_pneumoniae_R6_chromosome<>Listeria_monocytogenes_chromosome<>Oceanobacillus_iheyensis_chromosome<>Streptococcus_mutans_chromosome…	NC_000964_RNaseP_bact_b(-)_-_(hom)|NC_003210_RNaseP_bact_b(-)_-_(hom)	0	-	RNaseP_bact_b_NC_002745|UD(5'(1-1)|3'(0-0)),RNaseP_bact_b_NC_003210|UD(5'(0-0)|3'(1-1)),RNaseP_bact_b_NC_000964|UD(5'(0-0)|3'(0-0))	-	-	-
Bacillus_cereus_ATCC_10987	|	T-box_NC_003909	|	BCE_1922		polysaccharide biosynthesis family protein	*	<<<	275	|	1858514	1858704	>>>	190	|	277	>>>	BCE_1923	sodium-dependent transporter	*	T-box	642	3.2e-23	X		6	RNA	Bacillus_anthracis_Ames_chromosome<>Bacillus_anthracis_str_Sterne_chromosome<>Bacillus_thuringiensis_konkukian_chromosome<>Bacillus_anthracis_Ames_0581_plasmid_pXO2<>Bacillus_anthracis_Ames_0581_chromosome<>Bacillus_thuringiensis_Al_Hakam_chromosome	NC_000964_T1box1(+)_+_(hom)|NC_000964_T1box18(+)_+_(hom)|NC_000964_T1box5(+)_+_(hom)|NC_003210_T1box1(+)_+_(hom)|NC_000964_T1box13(-)_-_(hom)|NC_003210_T1box14(-)_-_(hom)|NC_002745_T1box7(-)_-_(hom)|NC_000964_T1box7(-)_-_(hom)|NC_002745_T1box8(-)_-_(hom)|NC_003210_T1box7(-)_-_(hom)|NC_000964_T1box9(-)_-_(hom)	10	T-box_NC_003909(para),T-box_NC_003909(para),T-box_NC_003909(para),T-box_NC_003909(para),Candidate_376_NC_003909(para),T-box_NC_003909(para),Candidate_434_NC_003909(para),T-box_NC_003909(para),Candidate_206_NC_003909(para),T-box_NC_003909(para)	T1box7_NC_003210|UD(5'(0-1)|3'(0-0)),T1box5_NC_000964|UD(5'(0-0)|3'(0-0)),T1box4_NC_002745|UD(5'(0-0)|3'(0-0)),T1box8_NC_000964|UD(5'(1-1)|3'(0-0)),T1box10_NC_000964|UD(5'(1-1)|3'(0-0)),Lysine2_NC_002745|UD(5'(1-1)|3'(1-1)),T1box12_NC_000964|UD(5'(0-0)|3'(0-0)),T1box6_NC_003210|UD(5'(1-0)|3'(0-0)),T1box8_NC_002745|UD(5'(1-0)|3'(0-0)),T1box3_NC_000964|3'(0),T1box12_NC_003210|3'(0),T1box3_NC_003210…	-	-	-B.subtilis_sigG_2(8.44|-302)
Bacillus_cereus_ATCC_10987	|	SAM_NC_003909	|	BCE_0197		ABC transporter, substrate-binding protein,	*	<<<	32	|	205314	205563	<<<	249	|	0	<<<	BCE_0198	alcohol dehydrogenase, zinc-containing	*	SAM	1325	4.6e-54	Z		4	RNA	Bacillus_anthracis_Ames_chromosome<>Bacillus_anthracis_str_Sterne_chromosome<>Bacillus_anthracis_Ames_0581_chromosome<>Bacillus_thuringiensis_Al_Hakam_chromosome	NC_003210_S_box2(-)_-_(hom)|NC_003210_S_box6(-)_-_(hom)|NC_003210_S_box7(-)_-_(hom)|NC_000964_S_box6(+)_+_(hom)|NC_000964_S_box2(+)_+_(hom)|NC_000964_S_box10(+)_+_(hom)|NC_000964_S_box1(-)_-_(hom)|NC_000964_S_box9(-)_-_(hom)|NC_002745_S_box2(+)_+_(hom)|NC_000964_S_box11(+)_+_(hom)|NC_000964_S_box7(-)_-_(hom)|NC_000964_S_box5(+)_+_(hom)|NC_003210_S_box1(+)_+_(hom)|NC_000964_S_box8(-)_-_(hom)|NC_00…	8	SAM_NC_003909(para),Candidate_74_NC_003909(para),SAM_NC_003909(para),SAM_NC_003909(para),SAM_NC_003909(para),SAM_NC_003909(para),Candidate_382_NC_003909(para),SAM_NC_003909(para)	S_box2_NC_003210|UD(5'(1-1)|3'(0-0)),S_box5_NC_000964|UD(5'(0-0)|3'(1-1)),S_box9_NC_000964|UD(5'(1-1)|3'(0-0)),S_box7_NC_003210|3'(0),S_box2_NC_002745|3'(0),S_box3_NC_003210|3'(0),T1box2_NC_002745|3'(0)	-	RS	-B.subtilis_sigA_2(9.4|-201)
Bacillus_cereus_ATCC_10987	|	T-box_NC_003909	|	BCE_2244		UDP-N-acetylmuramoylalanyl-D-glutamyl-2,	*	>>>	169	|	2151373	2151501	>>>	128	|	86	>>>	BCE_2245	pseudogene	*	T-box	1023	1.8e-39	Z		5	RNA	Bacillus_anthracis_Ames_chromosome<>Bacillus_anthracis_str_Sterne_chromosome<>Bacillus_thuringiensis_konkukian_chromosome<>Bacillus_anthracis_Ames_0581_chromosome<>Bacillus_thuringiensis_Al_Hakam_chromosome	NC_002745_T1box8(-)_-_(hom)|NC_000964_T1box6(+)_+_(hom)|NC_002745_T1box3(+)_+_(hom)|NC_000964_T1box2(+)_+_(hom)|NC_002745_T1box7(-)_-_(hom)|NC_003210_T1box1(+)_+_(hom)|NC_000964_T1box17(-)_-_(hom)	6	Candidate_381_NC_003909(anti),T-box_NC_003909(para),T-box_NC_003909(para),T-box_NC_003909(para),T-box_NC_003909(para),T-box_NC_003909(para),T-box_NC_003909(para)	T1box7_NC_003210|UD(5'(0-1)|3'(0-0)),T1box5_NC_000964|UD(5'(0-0)|3'(0-0)),T1box4_NC_002745|UD(5'(0-0)|3'(0-0)),T1box8_NC_000964|UD(5'(1-1)|3'(0-0)),T1box10_NC_000964|UD(5'(1-1)|3'(0-0)),Lysine2_NC_002745|UD(5'(1-1)|3'(1-1)),T1box12_NC_000964|UD(5'(0-0)|3'(0-0)),T1box6_NC_003210|UD(5'(1-0)|3'(0-0)),T1box8_NC_002745|UD(5'(1-0)|3'(0-0)),T1box3_NC_000964|3'(0),T1box12_NC_003210|3'(0),T1box3_NC_003210…	-	RS	-
Bacillus_cereus_ATCC_10987	|	T-box_NC_003909	|	BCE_2997		chorismate synthase	*	<<<	30	|	2808791	2809039	<<<	248	|	3	<<<	BCE_2998	3-deoxy-7-phosphoheptulonate synthase	*	T-box	361	3.7e-17	Z		5	RNA	Bacillus_anthracis_Ames_chromosome<>Bacillus_anthracis_str_Sterne_chromosome<>Bacillus_thuringiensis_konkukian_chromosome<>Bacillus_anthracis_Ames_0581_chromosome<>Bacillus_thuringiensis_Al_Hakam_chromosome	NC_000964_T1box13(-)_-_(hom)|NC_003210_T1box10(-)_-_(hom)|NC_000964_T1box15(-)_-_(hom)|NC_000964_T1box16(-)_-_(hom)|NC_002745_T1box7(-)_-_(hom)|NC_000964_T1box5(+)_+_(hom)|NC_003210_T1box3(-)_-_(hom)|NC_003210_T1box1(+)_+_(hom)|NC_002745_T1box8(-)_-_(hom)|NC_000964_T1box9(-)_-_(hom)|NC_000964_T1box14(-)_-_(hom)	11	T-box_NC_003909(para),T-box_NC_003909(para),T-box_NC_003909(para),Candidate_338_NC_003909(para),T-box_NC_003909(para),T-box_NC_003909(para),Candidate_376_NC_003909(para),T-box_NC_003909(para),T-box_NC_003909(para),T-box_NC_003909(para),Candidate_434_NC_003909(para)	T1box7_NC_003210|UD(5'(0-1)|3'(0-0)),T1box5_NC_000964|UD(5'(0-0)|3'(0-0)),T1box4_NC_002745|UD(5'(0-0)|3'(0-0)),T1box8_NC_000964|UD(5'(1-1)|3'(0-0)),T1box10_NC_000964|UD(5'(1-1)|3'(0-0)),Lysine2_NC_002745|UD(5'(1-1)|3'(1-1)),T1box12_NC_000964|UD(5'(0-0)|3'(0-0)),T1box6_NC_003210|UD(5'(1-0)|3'(0-0)),T1box8_NC_002745|UD(5'(1-0)|3'(0-0)),T1box3_NC_000964|3'(0),T1box12_NC_003210|3'(0),T1box3_NC_003210…	-	RS	-B.subtilis_sigG_3(8.93|-263)
Bacillus_cereus_ATCC_10987	|	T-box_NC_003909	|	BCE_2998		3-deoxy-7-phosphoheptulonate synthase	*	<<<	461	|	2810581	2810712	<<<	131	|	237	<<<	BCE_2999	hypothetical protein	*	T-box	178	1.7e-16	Z		6	RNA	Bacillus_halodurans_chromosome<>Bacillus_anthracis_Ames_chromosome<>Bacillus_anthracis_str_Sterne_chromosome<>Bacillus_thuringiensis_konkukian_chromosome<>Bacillus_anthracis_Ames_0581_chromosome<>Bacillus_thuringiensis_Al_Hakam_chromosome	NC_000964_T1box13(-)_-_(hom)|NC_003210_T1box11(-)_-_(hom)|NC_002745_T1box8(-)_-_(hom)|NC_002745_T1box7(-)_-_(hom)|NC_003210_T1box1(+)_+_(hom)|NC_000964_T1box18(+)_+_(hom)|NC_002745_T1box4(+)_+_(hom)|NC_000964_T1box9(-)_-_(hom)|NC_003210_T1box3(-)_-_(hom)|NC_003210_T1box7(-)_-_(hom)	4	T-box_NC_003909(para),T-box_NC_003909(para),Candidate_206_NC_003909(para),Candidate_434_NC_003909(para)	T1box7_NC_003210|UD(5'(0-1)|3'(0-0)),T1box5_NC_000964|UD(5'(0-0)|3'(0-0)),T1box4_NC_002745|UD(5'(0-0)|3'(0-0)),T1box8_NC_000964|UD(5'(1-1)|3'(0-0)),T1box10_NC_000964|UD(5'(1-1)|3'(0-0)),Lysine2_NC_002745|UD(5'(1-1)|3'(1-1)),T1box12_NC_000964|UD(5'(0-0)|3'(0-0)),T1box6_NC_003210|UD(5'(1-0)|3'(0-0)),T1box8_NC_002745|UD(5'(1-0)|3'(0-0)),T1box3_NC_000964|3'(0),T1box12_NC_003210|3'(0),T1box3_NC_003210…	-	-	-
Bacillus_cereus_ATCC_10987	|	T-box_NC_003909	|	BCE_4438		hypothetical protein	*	>>>	1	|	4113200	4113532	>>>	332	|	137	>>>	BCE_4439	phenylalanine-4-hydroxylase, putative	*	T-box	555	9.4e-20	Z		5	RNA	Bacillus_anthracis_Ames_chromosome<>Bacillus_anthracis_str_Sterne_chromosome<>Bacillus_thuringiensis_konkukian_chromosome<>Bacillus_anthracis_Ames_0581_chromosome<>Bacillus_thuringiensis_Al_Hakam_chromosome	NC_003210_T1box5(-)_-_(hom)|NC_000964_T1box13(-)_-_(hom)|NC_002745_T1box7(-)_-_(hom)|NC_003210_T1box7(-)_-_(hom)|NC_003210_T1box1(+)_+_(hom)|NC_002745_T1box8(-)_-_(hom)|NC_000964_T1box3(-)_-_(hom)|NC_000964_T1box5(+)_+_(hom)|NC_000964_T1box18(+)_+_(hom)|NC_003210_T1box2(-)_-_(hom)|NC_000964_T1box6(+)_+_(hom)|NC_003210_T1box4(-)_-_(hom)|NC_003210_T1box3(-)_-_(hom)	8	T-box_NC_003909(para),T-box_NC_003909(para),T-box_NC_003909(para),T-box_NC_003909(para),T-box_NC_003909(para),T-box_NC_003909(para),Candidate_434_NC_003909(para),T-box_NC_003909(para)	T1box7_NC_003210|UD(5'(0-1)|3'(0-0)),T1box5_NC_000964|UD(5'(0-0)|3'(0-0)),T1box4_NC_002745|UD(5'(0-0)|3'(0-0)),T1box8_NC_000964|UD(5'(1-1)|3'(0-0)),T1box10_NC_000964|UD(5'(1-1)|3'(0-0)),Lysine2_NC_002745|UD(5'(1-1)|3'(1-1)),T1box12_NC_000964|UD(5'(0-0)|3'(0-0)),T1box6_NC_003210|UD(5'(1-0)|3'(0-0)),T1box8_NC_002745|UD(5'(1-0)|3'(0-0)),T1box3_NC_000964|3'(0),T1box12_NC_003210|3'(0),T1box3_NC_003210…	-	-	-
Bacillus_cereus_ATCC_10987	|	T-box_NC_003909	|	BCE_4471		alanyl-tRNA synthetase	*	<<<	21	|	4142216	4142677	<<<	461	|	29	>>>	BCE_4472	hypothetical protein	*	T-box	2284	1.3e-97	X		5	RNA	Bacillus_anthracis_Ames_chromosome<>Bacillus_anthracis_str_Sterne_chromosome<>Bacillus_thuringiensis_konkukian_chromosome<>Bacillus_anthracis_Ames_0581_chromosome<>Bacillus_thuringiensis_Al_Hakam_chromosome	NC_000964_T1box8(-)_-_(hom)|NC_002745_T1box8(-)_-_(hom)|NC_003210_T1box4(-)_-_(hom)|NC_002745_T1box7(-)_-_(hom)|NC_000964_T1box14(-)_-_(hom)|NC_000964_T1box17(-)_-_(hom)|NC_003210_T1box2(-)_-_(hom)|NC_003210_T1box1(+)_+_(hom)|NC_003210_T1box14(-)_-_(hom)|NC_000964_T1box7(-)_-_(hom)	8	Candidate_381_NC_003909(para),T-box_NC_003909(para),T-box_NC_003909(para),T-box_NC_003909(para),T-box_NC_003909(para),T-box_NC_003909(para),Candidate_9_NC_003909(para),T-box_NC_003909(para)	T1box7_NC_003210|UD(5'(0-1)|3'(0-0)),T1box5_NC_000964|UD(5'(0-0)|3'(0-0)),T1box4_NC_002745|UD(5'(0-0)|3'(0-0)),T1box8_NC_000964|UD(5'(1-1)|3'(0-0)),T1box10_NC_000964|UD(5'(1-1)|3'(0-0)),Lysine2_NC_002745|UD(5'(1-1)|3'(1-1)),T1box12_NC_000964|UD(5'(0-0)|3'(0-0)),T1box6_NC_003210|UD(5'(1-0)|3'(0-0)),T1box8_NC_002745|UD(5'(1-0)|3'(0-0)),T1box3_NC_000964|3'(0),T1box12_NC_003210|3'(0),T1box3_NC_003210…	5	RS	-B.subtilis_sigK_1(10|-360)B.subtilis_sigA_3(9.78|-253)
Bacillus_cereus_ATCC_10987	|	T-box_NC_003909	|	BCE_4549		valyl-tRNA synthetase	*	<<<	19	|	4219446	4219819	<<<	373	|	0	<<<	BCE_4550	hypothetical protein	*	T-box	1848	7.9e-78	Y		5	RNA	Bacillus_anthracis_Ames_chromosome<>Bacillus_anthracis_str_Sterne_chromosome<>Bacillus_thuringiensis_konkukian_chromosome<>Bacillus_anthracis_Ames_0581_chromosome<>Bacillus_thuringiensis_Al_Hakam_chromosome	NC_003210_T1box5(-)_-_(hom)|NC_000964_T1box13(-)_-_(hom)|NC_003210_T1box1(+)_+_(hom)|NC_000964_T1box5(+)_+_(hom)|NC_002745_T1box7(-)_-_(hom)|NC_002745_T1box4(+)_+_(hom)|NC_000964_T1box2(+)_+_(hom)|NC_000964_T1box10(-)_-_(hom)|NC_003210_T1box3(-)_-_(hom)	5	T-box_NC_003909(para),T-box_NC_003909(para),T-box_NC_003909(para),T-box_NC_003909(para),T-box_NC_003909(para)	T1box7_NC_003210|UD(5'(0-1)|3'(0-0)),T1box5_NC_000964|UD(5'(0-0)|3'(0-0)),T1box4_NC_002745|UD(5'(0-0)|3'(0-0)),T1box8_NC_000964|UD(5'(1-1)|3'(0-0)),T1box10_NC_000964|UD(5'(1-1)|3'(0-0)),Lysine2_NC_002745|UD(5'(1-1)|3'(1-1)),T1box12_NC_000964|UD(5'(0-0)|3'(0-0)),T1box6_NC_003210|UD(5'(1-0)|3'(0-0)),T1box8_NC_002745|UD(5'(1-0)|3'(0-0)),T1box3_NC_000964|3'(0),T1box12_NC_003210|3'(0),T1box3_NC_003210…	5	RS	-
Bacillus_cereus_ATCC_10987	|	T-box_NC_003909	|	BCE_4673		branched-chain amino acid transport system II	*	<<<	102	|	4329012	4329083	<<<	71	|	307	<<<	BCE_4674	RNA pseudouridylate synthase family protein	*	T-box	245	7e-21	Z		7	RNA	Bacillus_halodurans_chromosome<>Bacillus_anthracis_Ames_chromosome<>Bacillus_anthracis_str_Sterne_chromosome<>Bacillus_thuringiensis_konkukian_chromosome<>Bacillus_clausii_KSM-K16_chromosome<>Bacillus_anthracis_Ames_0581_chromosome<>Bacillus_thuringiensis_Al_Hakam_chromosome	NC_000964_T1box15(-)_-_(hom)|NC_000964_T1box16(-)_-_(hom)|NC_000964_T1box17(-)_-_(hom)|NC_000964_T1box12(-)_-_(hom)|NC_003210_T1box2(-)_-_(hom)	1	T-box_NC_003909(para)	T1box7_NC_003210|UD(5'(0-1)|3'(0-0)),T1box5_NC_000964|UD(5'(0-0)|3'(0-0)),T1box4_NC_002745|UD(5'(0-0)|3'(0-0)),T1box8_NC_000964|UD(5'(1-1)|3'(0-0)),T1box10_NC_000964|UD(5'(1-1)|3'(0-0)),Lysine2_NC_002745|UD(5'(1-1)|3'(1-1)),T1box12_NC_000964|UD(5'(0-0)|3'(0-0)),T1box6_NC_003210|UD(5'(1-0)|3'(0-0)),T1box8_NC_002745|UD(5'(1-0)|3'(0-0)),T1box3_NC_000964|3'(0),T1box12_NC_003210|3'(0),T1box3_NC_003210…	-	-	-
Bacillus_cereus_ATCC_10987	|	T-box_NC_003909	|	BCE_4687		phenylalanyl-tRNA synthetase alpha subunit	*	<<<	26	|	4345374	4345490	<<<	116	|	177	<<<	BCE_4688	RNA methyltransferase, TrmH family	*	T-box	204	5.2e-16	Y		10	RNA	Listeria_monocytogenes_4b_F2365_chromosome<>Listeria_monocytogenes_chromosome<>Listeria_innocua_chromosome<>Bacillus_anthracis_Ames_chromosome<>Oceanobacillus_iheyensis_chromosome<>Bacillus_anthracis_str_Sterne_chromosome<>Bacillus_thuringiensis_konkukian_chromosome<>Geobacillus_kaustophilus_HTA426_chromosome<>Bacillus_anthracis_Ames_0581_chromosome<>Bacillus_amyloliquefaciens_FZB42_chromosome	NC_003210_T1box1(+)_+_(hom)|NC_003210_T1box5(-)_-_(hom)|NC_000964_T1box1(+)_+_(hom)|NC_000964_T1box9(-)_-_(hom)|NC_000964_T1box5(+)_+_(hom)|NC_002745_T1box7(-)_-_(hom)|NC_003210_T1box14(-)_-_(hom)|NC_000964_T1box6(+)_+_(hom)|NC_000964_T1box13(-)_-_(hom)|NC_002745_T1box8(-)_-_(hom)|NC_000964_T1box17(-)_-_(hom)|NC_002745_T1box4(+)_+_(hom)|NC_000964_T1box2(+)_+_(hom)|NC_003210_T1box3(-)_-_(hom)|NC_0…	17	T-box_NC_003909(para),T-box_NC_003909(para),T-box_NC_003909(para),T-box_NC_003909(para),T-box_NC_003909(para),T-box_NC_003909(para),T-box_NC_003909(para),Candidate_381_NC_003909(para),T-box_NC_003909(para),T-box_NC_003909(para),T-box_NC_003909(para),T-box_NC_003909(para),Candidate_9_NC_003909(para),T-box_NC_003909(para),T-box_NC_003909(para),T-box_NC_003909(para),Candidate_380_NC_003909(para)	T1box7_NC_003210|UD(5'(0-1)|3'(0-0)),T1box5_NC_000964|UD(5'(0-0)|3'(0-0)),T1box4_NC_002745|UD(5'(0-0)|3'(0-0)),T1box8_NC_000964|UD(5'(1-1)|3'(0-0)),T1box10_NC_000964|UD(5'(1-1)|3'(0-0)),Lysine2_NC_002745|UD(5'(1-1)|3'(1-1)),T1box12_NC_000964|UD(5'(0-0)|3'(0-0)),T1box6_NC_003210|UD(5'(1-0)|3'(0-0)),T1box8_NC_002745|UD(5'(1-0)|3'(0-0)),T1box3_NC_000964|3'(0),T1box12_NC_003210|3'(0),T1box3_NC_003210…	5	RS	-
Bacillus_cereus_ATCC_10987	|	T-box_NC_003909	|	BCE_4707		threonyl-tRNA synthetase	*	<<<	28	|	4360470	4360746	<<<	276	|	2	<<<	BCE_4708	hypothetical protein	*	T-box	556	2.2e-19	Z		6	RNA	Bacillus_anthracis_Ames_chromosome<>Bacillus_anthracis_str_Sterne_chromosome<>Bacillus_thuringiensis_konkukian_chromosome<>Bacillus_anthracis_Ames_0581_chromosome<>Bacillus_thuringiensis_Al_Hakam_chromosome<>Geobacillus_thermodenitrificans_NG80-2_chromosome	NC_000964_T1box15(-)_-_(hom)|NC_000964_T1box16(-)_-_(hom)|NC_000964_T1box17(-)_-_(hom)|NC_000964_T1box12(-)_-_(hom)|NC_003210_T1box6(-)_-_(hom)|NC_003210_T1box5(-)_-_(hom)|NC_000964_T1box5(+)_+_(hom)|NC_000964_T1box1(+)_+_(hom)|NC_000964_T1box13(-)_-_(hom)|NC_002745_T1box7(-)_-_(hom)|NC_003210_T1box2(-)_-_(hom)|NC_000964_T1box14(-)_-_(hom)|NC_002745_T1box1(+)_+_(hom)|NC_000964_T1box7(-)_-_(hom)	7	T-box_NC_003909(para),T-box_NC_003909(para),T-box_NC_003909(para),T-box_NC_003909(para),T-box_NC_003909(para),T-box_NC_003909(para),T-box_NC_003909(para)	T1box7_NC_003210|UD(5'(0-1)|3'(0-0)),T1box5_NC_000964|UD(5'(0-0)|3'(0-0)),T1box4_NC_002745|UD(5'(0-0)|3'(0-0)),T1box8_NC_000964|UD(5'(1-1)|3'(0-0)),T1box10_NC_000964|UD(5'(1-1)|3'(0-0)),Lysine2_NC_002745|UD(5'(1-1)|3'(1-1)),T1box12_NC_000964|UD(5'(0-0)|3'(0-0)),T1box6_NC_003210|UD(5'(1-0)|3'(0-0)),T1box8_NC_002745|UD(5'(1-0)|3'(0-0)),T1box3_NC_000964|3'(0),T1box12_NC_003210|3'(0),T1box3_NC_003210…	5	RS	-B.subtilis_sigG_1(9.85|-401)B.subtilis_sigG_3(9.66|-249)B.subtilis_sigA_2(11.39|-270)
Bacillus_cereus_ATCC_10987	|	T-box_NC_003909	|	BCE_4796		tyrosyl-tRNA synthetase	*	<<<	52	|	4439252	4439550	<<<	298	|	25	<<<	BCE_4797	hypothetical protein	*	T-box	567	3e-20	Z		5	RNA	Bacillus_anthracis_Ames_chromosome<>Bacillus_anthracis_str_Sterne_chromosome<>Bacillus_thuringiensis_konkukian_chromosome<>Bacillus_anthracis_Ames_0581_chromosome<>Bacillus_thuringiensis_Al_Hakam_chromosome	NC_003210_T1box1(+)_+_(hom)|NC_000964_T1box13(-)_-_(hom)|NC_003210_T1box9(-)_-_(hom)|NC_000964_T1box18(+)_+_(hom)|NC_000964_T1box5(+)_+_(hom)|NC_000964_T1box7(-)_-_(hom)|NC_002745_T1box7(-)_-_(hom)|NC_002745_T1box8(-)_-_(hom)|NC_002745_T1box3(+)_+_(hom)|NC_000964_T1box9(-)_-_(hom)	5	T-box_NC_003909(para),T-box_NC_003909(para),Candidate_376_NC_003909(para),T-box_NC_003909(para),T-box_NC_003909(para)	T1box7_NC_003210|UD(5'(0-1)|3'(0-0)),T1box5_NC_000964|UD(5'(0-0)|3'(0-0)),T1box4_NC_002745|UD(5'(0-0)|3'(0-0)),T1box8_NC_000964|UD(5'(1-1)|3'(0-0)),T1box10_NC_000964|UD(5'(1-1)|3'(0-0)),Lysine2_NC_002745|UD(5'(1-1)|3'(1-1)),T1box12_NC_000964|UD(5'(0-0)|3'(0-0)),T1box6_NC_003210|UD(5'(1-0)|3'(0-0)),T1box8_NC_002745|UD(5'(1-0)|3'(0-0)),T1box3_NC_000964|3'(0),T1box12_NC_003210|3'(0),T1box3_NC_003210…	-	RS	-
Bacillus_cereus_ATCC_10987	|	T-box_NC_003909	|	BCE_4882		leucyl-tRNA synthetase	*	<<<	46	|	4511846	4512083	<<<	237	|	187	<<<	BCE_4883	permease, putative	*	T-box	483	3.9e-16	Z		7	RNA	Bacillus_anthracis_Ames_chromosome<>Oceanobacillus_iheyensis_chromosome<>Bacillus_anthracis_str_Sterne_chromosome<>Bacillus_thuringiensis_konkukian_chromosome<>Bacillus_anthracis_Ames_0581_chromosome<>Bacillus_thuringiensis_Al_Hakam_chromosome<>Geobacillus_thermodenitrificans_NG80-2_chromosome	NC_000964_T1box14(-)_-_(hom)|NC_000964_T1box5(+)_+_(hom)|NC_000964_T1box1(+)_+_(hom)|NC_003210_T1box10(-)_-_(hom)|NC_003210_T1box4(-)_-_(hom)|NC_003210_T1box7(-)_-_(hom)|NC_000964_T1box13(-)_-_(hom)|NC_000964_T1box11(-)_-_(hom)	10	T-box_NC_003909(para),T-box_NC_003909(para),T-box_NC_003909(para),T-box_NC_003909(para),T-box_NC_003909(para),T-box_NC_003909(para),T-box_NC_003909(para),Candidate_9_NC_003909(para),T-box_NC_003909(para),T-box_NC_003909(para)	T1box7_NC_003210|UD(5'(0-1)|3'(0-0)),T1box5_NC_000964|UD(5'(0-0)|3'(0-0)),T1box4_NC_002745|UD(5'(0-0)|3'(0-0)),T1box8_NC_000964|UD(5'(1-1)|3'(0-0)),T1box10_NC_000964|UD(5'(1-1)|3'(0-0)),Lysine2_NC_002745|UD(5'(1-1)|3'(1-1)),T1box12_NC_000964|UD(5'(0-0)|3'(0-0)),T1box6_NC_003210|UD(5'(1-0)|3'(0-0)),T1box8_NC_002745|UD(5'(1-0)|3'(0-0)),T1box3_NC_000964|3'(0),T1box12_NC_003210|3'(0),T1box3_NC_003210…	-	RS	-
Bacillus_cereus_ATCC_10987	|	T-box_NC_003909	|	BCE_5157		amino acid permease family protein	*	<<<	46	|	4760106	4760187	<<<	81	|	213	<<<	BCE_5158	hypothetical protein	*	T-box	236	5.6e-17	Y		9	RNA	Bacillus_halodurans_chromosome<>Bacillus_anthracis_Ames_chromosome<>Bacillus_anthracis_str_Sterne_chromosome<>Bacillus_thuringiensis_konkukian_chromosome<>Geobacillus_kaustophilus_HTA426_chromosome<>Bacillus_clausii_KSM-K16_chromosome<>Bacillus_anthracis_Ames_0581_chromosome<>Bacillus_thuringiensis_Al_Hakam_chromosome<>Geobacillus_thermodenitrificans_NG80-2_chromosome	NC_000964_T1box15(-)_-_(hom)|NC_000964_T1box17(-)_-_(hom)|NC_000964_T1box12(-)_-_(hom)|NC_003210_T1box6(-)_-_(hom)|NC_002745_T1box7(-)_-_(hom)|NC_000964_T1box1(+)_+_(hom)|NC_000964_T1box5(+)_+_(hom)|NC_000964_T1box14(-)_-_(hom)	4	T-box_NC_003909(para),T-box_NC_003909(para),T-box_NC_003909(para),T-box_NC_003909(para)	T1box7_NC_003210|UD(5'(0-1)|3'(0-0)),T1box5_NC_000964|UD(5'(0-0)|3'(0-0)),T1box4_NC_002745|UD(5'(0-0)|3'(0-0)),T1box8_NC_000964|UD(5'(1-1)|3'(0-0)),T1box10_NC_000964|UD(5'(1-1)|3'(0-0)),Lysine2_NC_002745|UD(5'(1-1)|3'(1-1)),T1box12_NC_000964|UD(5'(0-0)|3'(0-0)),T1box6_NC_003210|UD(5'(1-0)|3'(0-0)),T1box8_NC_002745|UD(5'(1-0)|3'(0-0)),T1box3_NC_000964|3'(0),T1box12_NC_003210|3'(0),T1box3_NC_003210…	-	RS	-
Bacillus_cereus_ATCC_10987	|	TPP_NC_003909	|	BCE_0485		DNA topoisomerase III	*	<<<	1	|	500691	501056	>>>	365	|	36	>>>	BCE_0486	hydroxyethylthiazole kinase	*	TPP	1499	4.5e-62	X		5	RNA	Bacillus_anthracis_Ames_chromosome<>Bacillus_anthracis_str_Sterne_chromosome<>Bacillus_thuringiensis_konkukian_chromosome<>Bacillus_anthracis_Ames_0581_chromosome<>Bacillus_thuringiensis_Al_Hakam_chromosome	NC_000964_THI5(+)_+_(hom)|NC_003210_THI1(+)_+_(hom)|NC_003210_THI2(-)_-_(hom)	1	TPP_NC_003909(para)	THI2_NC_000964|3'(0),THI1_NC_000964|3'(0),THI1_NC_002505|3'(0),THI2_NC_000913|3'(0),THI_NC_002516|3'(0),THI1_NC_003112|3'(0),THI_NC_005072|3'(0)	5	RS	-
Bacillus_cereus_ATCC_10987	|	T-box_NC_003909	|	BCE_0509		hypothetical protein	*	>>>	1	|	521947	522267	>>>	320	|	26	>>>	BCE_0510	prolyl-tRNA synthetase	*	T-box	1254	2.9e-51	Y		5	RNA	Bacillus_anthracis_Ames_chromosome<>Bacillus_anthracis_str_Sterne_chromosome<>Bacillus_thuringiensis_konkukian_chromosome<>Bacillus_anthracis_Ames_0581_chromosome<>Bacillus_thuringiensis_Al_Hakam_chromosome	NC_000964_T1box1(+)_+_(hom)|NC_000964_T1box8(-)_-_(hom)|NC_000964_T1box10(-)_-_(hom)|NC_000964_T1box3(-)_-_(hom)|NC_002745_sprC(-)_-_(hom|rev)	2	T-box_NC_003909(para),T-box_NC_003909(para)	T1box7_NC_003210|UD(5'(0-1)|3'(0-0)),T1box5_NC_000964|UD(5'(0-0)|3'(0-0)),T1box4_NC_002745|UD(5'(0-0)|3'(0-0)),T1box8_NC_000964|UD(5'(1-1)|3'(0-0)),T1box10_NC_000964|UD(5'(1-1)|3'(0-0)),Lysine2_NC_002745|UD(5'(1-1)|3'(1-1)),T1box12_NC_000964|UD(5'(0-0)|3'(0-0)),T1box6_NC_003210|UD(5'(1-0)|3'(0-0)),T1box8_NC_002745|UD(5'(1-0)|3'(0-0)),T1box3_NC_000964|3'(0),T1box12_NC_003210|3'(0),T1box3_NC_003210…	5	RS	-B.subtilis_sigK_1(9.12|-107)B.subtilis_sigG_2(8.78|-298)B.subtilis_sigG_3(9.55|-341)B.subtilis_sigG_3(8.15|-287)
Bacillus_cereus_ATCC_10987	|	yybP-ykoY_NC_003909	|	BCE_0900		hypothetical protein	*	<<<	85	|	926704	926935	>>>	231	|	23	>>>	BCE_0901	hypothetical protein	*	yybP-ykoY	219	8.2e-16	X		6	RNA	Bacillus_halodurans_chromosome<>Bacillus_anthracis_Ames_chromosome<>Bacillus_anthracis_str_Sterne_chromosome<>Bacillus_thuringiensis_konkukian_chromosome<>Bacillus_anthracis_Ames_0581_chromosome<>Bacillus_thuringiensis_Al_Hakam_chromosome	NC_000964_yybP1ykoY2(-)_-_(hom)|NC_003210_yybP1ykoY(+)_+_(hom)|NC_002745_yybP1ykoY(+)_+_(hom)	0	-	yybP1ykoY_NC_003210|3'(0),yybP1ykoY1_NC_000964|3'(0),yybP1ykoY_NC_002745|3'(0)	5	-	-
Bacillus_cereus_ATCC_10987	|	Candidate_7_NC_005707	|	BCE_A0139		hypothetical protein	*	>>>	123	|	124708	124857	>>>	149	|	19	>>>	BCE_A0140	DNA topoisomerase I	*	candidate	500	2.6e-17	T		1	RNA	Bacillus_thuringiensis_konkukian_chromosome	NC_000913_RybC_SroB(+)_+_(hom|rev)	2	Candidate_8_NC_005707(para),Candidate_4_NC_005707(para)	-	5	RS	-B.subtilis_sigG_1(8.71|-186)
Bacillus_cereus_ATCC14579	|	Candidate_25_NC_004722	|	BC3738		Iron(III) dicitrate-binding protein	*	<<<	1	|	3703249	3703541	>>>	292	|	8	<<<	BC3739	Exodeoxyribonuclease III	*	candidate	1250	2.5e-51	R		4	RNA	Bacillus_anthracis_Ames_chromosome<>Bacillus_anthracis_str_Sterne_chromosome<>Bacillus_thuringiensis_konkukian_chromosome<>Bacillus_anthracis_Ames_0581_chromosome	NC_002745_sprC(-)_-_(hom|rev)	0	-	-	-	-	-Multi_Fur(16.21|-117)Multi_Fur(17.3|-101)B.subtilis_sigG_1(8.88|-261)B.subtilis_sigG_3(10.29|-261)
Bacillus_cereus_ATCC14579	|	Candidate_34_NC_004722	|	BC4087		phosphopentomutase	*	<<<	82	|	4056722	4056991	>>>	269	|	2	<<<	BC4088	IG hypothetical 17224	*	candidate	1127	2.8e-45	R		5	-	Bacillus_anthracis_Ames_chromosome<>Bacillus_anthracis_str_Sterne_chromosome<>Bacillus_thuringiensis_konkukian_chromosome<>Bacillus_anthracis_Ames_0581_chromosome<>Bacillus_thuringiensis_Al_Hakam_chromosome	NC_002745_sprC(-)_-_(hom|rev)	0	-	-	-	-	-
Bacillus_cereus_ATCC14579	|	Candidate_59_NC_004722	|	BC4794		Spore germination protein PF	*	<<<	295	|	4722919	4723285	<<<	366	|	18	>>>	BC4795	hypothetical Membrane Spanning Protein	*	candidate	486	9.7e-16	R		5	RNA	Bacillus_anthracis_Ames_chromosome<>Bacillus_anthracis_str_Sterne_chromosome<>Bacillus_thuringiensis_konkukian_chromosome<>Bacillus_anthracis_Ames_0581_chromosome<>Bacillus_thuringiensis_Al_Hakam_chromosome	NC_000964_Purine5(+)_+_(hom|rev)	1	Candidate_73_NC_004722(para)	-	-	-	-B.subtilis_sigG_2(9.06|-378)B.subtilis_sigG_3(8.38|-334)
Bacillus_cereus_ATCC14579	|	Candidate_62_NC_004722	|	BC4556		ribonuclease HIII	*	>>>	11	|	4502950	4503054	<<<	104	|	0	>>>	BC4557	hypothetical protein	*	candidate	535	6.9e-19	R		5	RNA	Bacillus_anthracis_Ames_chromosome<>Bacillus_anthracis_str_Sterne_chromosome<>Bacillus_thuringiensis_konkukian_chromosome<>Bacillus_anthracis_Ames_0581_chromosome<>Bacillus_thuringiensis_Al_Hakam_chromosome	NC_002745_sprC(-)_-_(hom)	0	-	-	-	-	-
Bacillus_cereus_ATCC14579	|	Candidate_63_NC_004722	|	BC4417		BofC protein	*	<<<	153	|	4358777	4359031	<<<	254	|	16	>>>	BC4418	hypothetical protein	*	candidate	1277	4.6e-52	R		5	RNA	Bacillus_anthracis_Ames_chromosome<>Bacillus_anthracis_str_Sterne_chromosome<>Bacillus_thuringiensis_konkukian_chromosome<>Bacillus_anthracis_Ames_0581_chromosome<>Bacillus_thuringiensis_Al_Hakam_chromosome	NC_002745_Purine(+)_+_(hom)	0	-	-	-	-	-
Bacillus_cereus_ATCC14579	|	Candidate_64_NC_004722	|	BC4417		BofC protein	*	<<<	97	|	4358721	4359031	<<<	310	|	16	>>>	BC4418	hypothetical protein	*	candidate	1277	4.6e-52	R		5	RNA	Bacillus_anthracis_Ames_chromosome<>Bacillus_anthracis_str_Sterne_chromosome<>Bacillus_thuringiensis_konkukian_chromosome<>Bacillus_anthracis_Ames_0581_chromosome<>Bacillus_thuringiensis_Al_Hakam_chromosome	NC_002745_Purine(+)_+_(hom)	0	-	-	-	-	-
Bacillus_cereus_ATCC14579	|	Candidate_80_NC_004722	|	BC2046		CBS domain containing protein	*	>>>	9	|	1989494	1989926	<<<	432	|	14	>>>	BC2047	Branched-chain amino acid transport system	*	candidate	738	1e-27	R		5	RNA	Bacillus_anthracis_Ames_chromosome<>Bacillus_anthracis_str_Sterne_chromosome<>Bacillus_thuringiensis_konkukian_chromosome<>Bacillus_anthracis_Ames_0581_chromosome<>Bacillus_thuringiensis_Al_Hakam_chromosome	NC_000964_Purine5(+)_+_(hom|rev)	1	Candidate_277_NC_004722(para)	-	-	-	-B.subtilis_sigG_1(9.32|-162)B.subtilis_sigG_3(9.47|-162)B.subtilis_sigA_3(9.25|-82)B.subtilis_sigA_3(9.4|-396)
Bacillus_cereus_ATCC14579	|	Candidate_97_NC_004722	|	BC0547		Sensory box/GGDEF family protein	*	>>>	4	|	525756	526136	<<<	380	|	0	>>>	BC0548	Serine protein kinase	*	candidate	1614	2.9e-67	R		3	RNA	Bacillus_anthracis_str_Sterne_chromosome<>Bacillus_thuringiensis_konkukian_chromosome<>Bacillus_thuringiensis_Al_Hakam_chromosome	NC_002745_T1box8(-)_-_(hom|rev)|NC_002745_sprC(-)_-_(hom|rev)	0	-	-	-	-	-
Bacillus_cereus_ATCC14579	|	Candidate_121_NC_004722	|	BC0233		hypothetical protein	*	>>>	1	|	207610	207712	>>>	102	|	633	>>>	BC0234	Sec-independent secretion TatD	*	candidate	2766	1.5e-119	B		5	RNA	Bacillus_anthracis_Ames_chromosome<>Bacillus_anthracis_str_Sterne_chromosome<>Bacillus_thuringiensis_konkukian_chromosome<>Bacillus_anthracis_Ames_0581_chromosome<>Bacillus_thuringiensis_Al_Hakam_chromosome	NC_002745_T1box1(+)_+_(hom)	0	Candidate_105_NC_004722(anti)	-	-	-	-
Bacillus_cereus_ATCC14579	|	Candidate_122_NC_004722	|	BC0233		hypothetical protein	*	>>>	1	|	207610	207925	>>>	315	|	420	>>>	BC0234	Sec-independent secretion TatD	*	candidate	2766	1.5e-119	T		5	RNA	Bacillus_anthracis_Ames_chromosome<>Bacillus_anthracis_str_Sterne_chromosome<>Bacillus_thuringiensis_konkukian_chromosome<>Bacillus_anthracis_Ames_0581_chromosome<>Bacillus_thuringiensis_Al_Hakam_chromosome	NC_002745_T1box1(+)_+_(hom)	1	Candidate_105_NC_004722(anti),Candidate_96_NC_004722(para)	-	-	-	-B.subtilis_sigG_2(8.42|-137)
Bacillus_cereus_ATCC14579	|	Candidate_129_NC_004722	|	BC0344		1-pyrroline-5-carboxylate dehydrogenase	*	>>>	8	|	323008	323250	<<<	242	|	19	<<<	BC0345	Isochorismatase	*	candidate	774	1.8e-29	T		5	-	Bacillus_anthracis_Ames_chromosome<>Bacillus_anthracis_str_Sterne_chromosome<>Bacillus_thuringiensis_konkukian_chromosome<>Bacillus_anthracis_Ames_0581_chromosome<>Bacillus_thuringiensis_Al_Hakam_chromosome	NC_002745_RNAIII(-)_-_(hom)	0	Candidate_130_NC_004722(anti)	-	-	-	-B.subtilis_sigG_3(9.35|-158)
Bacillus_cereus_ATCC14579	|	Candidate_130_NC_004722	|	BC0344		1-pyrroline-5-carboxylate dehydrogenase	*	>>>	43	|	323043	323270	>>>	227	|	-1	<<<	BC0345	Isochorismatase	*	candidate	774	1.8e-29	T		5	-	Bacillus_anthracis_Ames_chromosome<>Bacillus_anthracis_str_Sterne_chromosome<>Bacillus_thuringiensis_konkukian_chromosome<>Bacillus_anthracis_Ames_0581_chromosome<>Bacillus_thuringiensis_Al_Hakam_chromosome	NC_002745_RNAIII(-)_-_(hom|rev)	0	Candidate_129_NC_004722(anti)	-	-	-	-
Bacillus_cereus_ATCC14579	|	Candidate_163_NC_004722	|	BC0970		hypothetical protein	*	>>>	7	|	958382	958638	<<<	256	|	4	<<<	BC0971	Carboxylic ester hydrolase	*	candidate	610	7.5e-22	T		5	RNA	Bacillus_anthracis_Ames_chromosome<>Bacillus_anthracis_str_Sterne_chromosome<>Bacillus_thuringiensis_konkukian_chromosome<>Bacillus_anthracis_Ames_0581_chromosome<>Bacillus_thuringiensis_Al_Hakam_chromosome	NC_002505_B2(-)_-_(hom)	0	-	-	-	-	-
Bacillus_cereus_ATCC14579	|	Candidate_164_NC_004722	|	BC0989		hypothetical protein	*	>>>	63	|	975411	975535	<<<	124	|	303	<<<	BC0990	hypothetical protein	*	candidate	333	9.5e-21	T		3	RNA	Bacillus_thuringiensis_konkukian_chromosome<>Bacillus_thuringiensis_Al_Hakam_plasmid_pALH1<>Bacillus_thuringiensis_Al_Hakam_chromosome	NC_002745_sprC(-)_-_(hom|rev)	1	Candidate_165_NC_004722(tandem)	-	-	-	-
Bacillus_cereus_ATCC14579	|	Candidate_165_NC_004722	|	BC0989		hypothetical protein	*	>>>	197	|	975545	975679	<<<	134	|	159	<<<	BC0990	hypothetical protein	*	candidate	745	5.2e-28	T		6	RNA	Bacillus_anthracis_Ames_chromosome<>Bacillus_anthracis_str_Sterne_chromosome<>Bacillus_thuringiensis_konkukian_chromosome<>Bacillus_anthracis_Ames_0581_chromosome<>Bacillus_thuringiensis_Al_Hakam_plasmid_pALH1<>Bacillus_thuringiensis_Al_Hakam_chromosome	NC_002745_sprC(-)_-_(hom|rev)	2	Candidate_164_NC_004722(tandem),Candidate_407_NC_004722(para)	-	-	-	-
Bacillus_cereus_ATCC14579	|	Candidate_169_NC_004722	|	BC1000		hypothetical Membrane Spanning Protein	*	>>>	1	|	983082	983189	>>>	107	|	72	<<<	BC1001	hypothetical protein	*	candidate	715	2.5e-26	B		5	RNA	Bacillus_anthracis_Ames_chromosome<>Bacillus_anthracis_str_Sterne_chromosome<>Bacillus_thuringiensis_konkukian_chromosome<>Bacillus_anthracis_Ames_0581_chromosome<>Bacillus_thuringiensis_Al_Hakam_chromosome	NC_002745_RNAIII(-)_-_(hom|rev)	0	Candidate_167_NC_004722(anti),Candidate_168_NC_004722(anti)	-	-	-	-Multi_Fur(11.71|-88)
Bacillus_cereus_ATCC14579	|	Candidate_201_NC_004722	|	BC1582		5'-3' exonuclease	*	>>>	207	|	1530346	1530673	>>>	327	|	308	>>>	BC1583	O-acetyl transferase	*	candidate	1290	1.2e-52	B		1	RNA	Bacillus_thuringiensis_Al_Hakam_chromosome	NC_005072_yfr3(+)_+_(hom|rev)	3	Candidate_83_NC_004722(anti),Candidate_257_NC_004722(para),Candidate_258_NC_004722(para),Candidate_226_NC_004722(para)	-	-	-	-B.subtilis_sigG_2(8.58|-338)B.subtilis_sigA_1(9.99|-442)
Bacillus_cereus_ATCC14579	|	Candidate_202_NC_004722	|	BC1614		Multidrug-efflux transporter 2 regulator	*	>>>	1	|	1572976	1573077	>>>	101	|	39	>>>	BC1615	Na+ driven multidrug efflux pump	*	candidate	539	3e-18	T		5	-	Bacillus_anthracis_Ames_chromosome<>Bacillus_anthracis_str_Sterne_chromosome<>Bacillus_thuringiensis_konkukian_chromosome<>Bacillus_anthracis_Ames_0581_chromosome<>Bacillus_thuringiensis_Al_Hakam_chromosome	NC_002745_RNAIII(-)_-_(hom|rev)	0	-	-	5	-	-
Bacillus_cereus_ATCC14579	|	Candidate_213_NC_004722	|	BC1952		Nitroreductase family protein	*	>>>	9	|	1899016	1899367	>>>	351	|	595	>>>	BC1953	Enterotoxin	*	candidate	942	2.8e-37	T		4	RNA	Bacillus_anthracis_Ames_chromosome<>Bacillus_anthracis_str_Sterne_chromosome<>Bacillus_anthracis_Ames_0581_chromosome<>Bacillus_thuringiensis_Al_Hakam_chromosome	NC_002745_sprC(-)_-_(hom|rev)	6	ykoK_NC_004722(para),Candidate_72_NC_004722(para),Candidate_170_NC_004722(para),Candidate_171_NC_004722(para),Candidate_214_NC_004722(para),Candidate_151_NC_004722(para)	-	-	-	-B.subtilis_sigK_1(9.57|-356)
[truncated: 4,824 more rows]
