# Supplementary material for: High-Throughput, Kingdom-Wide Prediction and Annotation of Bacterial Non-Coding RNAs
Source: PLoS One. 2008 Sep 12;3(9):e3197. doi: 10.1371/journal.pone.0003197 (PMC2527527; doi:10.1371/journal.pone.0003197)
Supplement: Table S3 — All predicted loci lacking homology to but sharing conserved synteny with previously predicted and/or confirmed regulatory RNAs in our database (2.98 MB XLS) [file pone.0003197.s003.xls]

## Sheet: Sheet1
Supplemetary Table 3: All predicted loci lacking homology to but sharing conserved synteny with previously predicted and/or confirmed regulatory RNAs in our database
Guide for interpreting SIPHT output
Species Name		Locus Name	|	UpORFnumber		UpORFname		UpORF direction	Distance RNA from UpORF	|	RNA start	end	RNA direction	RNA length	|	Distance RNA from DnORF	DnORF direction	DnORFnumber	DnORFname		Locus Type	BLASTscore	BLASTexpect	TermType	# replicons in which conserved	QRNA?	Name of replicons in which conserved	Homology to known ncRNAs?	# paralogues	Paralogous candidates	Conserved synteny with known ncRNA?	Potential UTR	Riboswitch?	Putative TFBSs?
NCBI name of species carrying replicon		Names for loci followed by accession number of replicon. Loci that do not correspond to known ncRNAs will include the prefix "Candidate". Names for loci that do correspond to known ncRNAs will include the name of the known ncRNA.		NCBI assigned number for ORF (from .ptt annotation)		NCBI assigned name for ORF (from .ptt annotation). Longer ORF names are truncated		Strand orientation of Upstream ORF	# of bp between 3' boundary of Upstream ORF and 5' boundary of predicted locus		Coordinate position of the beginning of the locus. For loci on the + strand, this corresponds to the 3' end of the putative terminator; for those on the - strand this is an estimation based on 5' end of conservation.	Coordinate position of the end of the locus. For loci on the + strand, this is an estimation based on 5' end of conservation; for those on the - strand this corresponds to the 3' end of the putative terminator.	Strand orientation of locus	Predicted length of sRNA based on the distance between 5' end of conservation and 3' end of puative terminator. NOTE: this prediction is often significantly different than the observed size as conservation may continue beyond the boundary or cover only a portion of the locus.		# of bp between 3' boundary of predicted locus and 5' boundary of downstream ORF	Strand orientation of downstream ORF	NCBI assigned name for ORF (from .ptt annotation). Longer ORF names are truncated	NCBI assigned number for ORF (from .ptt annotation)		Locus type	BLAST score of intergenic conservation. If conservation was found in multiple replicons, this number corresponds to the highest score among these HSPs.	BLAST expect value of intergenic conservation. If conservation was found in multiple replicons, this number corresponds to the lowest E among these HSPs.	Program(s) that identified associated terminator. T=TransTerm, F=FindTerm, R=RNAMotif, B=T+R, X=F+R, Y=F+T, Z=all three programs.	The number of partner replicons in which intergenic sequence conservation was found.	QRNA designation. RNA=conserved secondary structure, COD=conserved coding sequence, -=neither.	The names of partner replicons in which intergenic sequence conservation was found.	Accession number_name of RNA_(strand orientation). If this is followed by (hom) the known locus is in a different replicon then the ROI. If followed by (hom|rev) the known locus is in a different replicon then the ROI and on the opposite strand. If followed by (tandem) it is in the same replicon and in the same IGR on the same strand but not in the same position as the candidate locus. If followe…	# predicted loci loci in the same replicon that share homology with candidate	Accession number_name of paralogous candidate. If this is followed by (para) the paralogous locus is in a different IGR than the candidate. If this is followed by (tandem) the paralogous locus is in the same IGR as the candidate. If this is followed by (rev) the paralogous locus overlaps but is in the opposite orientation as the candidate.	Name_accession number of known RNA with which candidate shares synteny. If this is followed by 3'(0), only the genes directly 3' of the candidate and known loci share homology. If followed by UD, both upstream and downstream genes are homologous. UD is followed by 5'(x-y) where x is the relative position of the homologous gene upstream of the candidate and y is the relative poisiton of the homolo…	'5' dentoes 3' end of the predicted locus is < 30 bp upstream of annotated start of downstream ORF on the same strand. '3' dentoes 3' end of the predicted locus is < 80 bp downstream of annotated end of upstream ORF on the same strand.	Denoted by RS	Species from which consensus matrix was derived_transcription factor name_matrix number(patser score|distance between TFBS and putative terminator (in other words predicted length). If species=Multi, the consensus matrix was derived from experimentally determined regulons in multiple species (see Materials and Methods).
Species Name		Locus Name	|	UpORFnumber		UpORFname		UpORF direction	Distance RNA from UpORF	|	RNA start	end	RNA direction	RNA length	|	Distance RNA from DnORF	DnORF direction	DnORFnumber	DnORFname		Locus Type	BLASTscore	BLASTexpect	TermType	# replicons in which conserved	QRNA?	Name of replicons in which conserved		# paralogues	Paralogous candidates	Conserved synteny with known ncRNA?	Potential UTR	Riboswitch?	Putative TFBSs?
Acidovorax_avenae_citrulli_AAC00-1	|	Candidate_1_NC_008752	|	Aave_1258		ribosomal protein S15	*	>>>	1	|	1382894	1383041	>>>	147	|	67	>>>	Aave_1259	3' exoribonuclease	*	candidate	517	1.9e-17	T	1	RNA	Acidovorax_JS42_chromosome	-	0	-	Cobalamin3_NC_002516|UD(5'(1-0)|3'(1-1)),P11_yes_NC_002516|3'(0)	5	-	-
Acidovorax_avenae_citrulli_AAC00-1	|	Candidate_8_NC_008752	|	Aave_1536		hypothetical protein	*	<<<	221	|	1702394	1702555	>>>	161	|	105	>>>	Aave_1537	TonB-dependent receptor	*	candidate	310	2.5e-16	F	6	-	Burkholderia_mallei_ATCC_23344_chromosome_1<>Burkholderia_pseudomallei_K96243_chromosome_1<>Rhodoferax_ferrireducens_T118_chromosome<>Polaromonas_naphthalenivorans_CJ2_chromosome<>Verminephrobacter_eiseniae_EF01-2_chromosome<>Burkholderia_vietnamiensis_G4_chromosome_1	-	0	-	Cobalamin2_NC_002516|3'(0),Cobalamin1_NC_002516|3'(0)	-	-	-
Acidovorax_avenae_citrulli_AAC00-1	|	Candidate_10_NC_008752	|	Aave_2001		integral membrane protein, YccS/YhfK family	*	>>>	13	|	2177674	2178024	>>>	350	|	189	<<<	Aave_2002	protein of unknown function UPF0118	*	candidate	312	9.1e-17	Y	1	RNA	Polaromonas_JS666_chromosome	-	5	Candidate_5_NC_008752(para),Candidate_18_NC_008752(para),Candidate_13_NC_008752(para),Candidate_2_NC_008752(para),Candidate_3_NC_008752(para)	Cobalamin1_NC_002516|UD(5'(0-0)|3'(0-0)),P20_yes_NC_002516|3'(0)	-	-	-
Acidovorax_avenae_citrulli_AAC00-1	|	Candidate_15_NC_008752	|	Aave_2105		molybdopterin oxidoreductase	*	<<<	489	|	2310253	2310317	<<<	64	|	30	<<<	Aave_2106	nitrite reductase (NAD(P)H), small subunit	*	candidate	238	2.1e-17	F	1	RNA	Polaromonas_naphthalenivorans_CJ2_chromosome	-	3	Candidate_13_NC_008752(opp),Candidate_5_NC_008752(para),Candidate_18_NC_008752(para)	Cobalamin1_NC_002516|3'(0)	-	-	-
Acidovorax_avenae_citrulli_AAC00-1	|	Candidate_16_NC_008752	|	Aave_2995		Chorismate synthase	*	<<<	105	|	3303938	3304035	>>>	97	|	49	<<<	Aave_2996	putative transcriptional regulator, XRE family	*	candidate	515	2.4e-17	F	1	RNA	Acidovorax_JS42_chromosome	-	2	Candidate_22_NC_008752(para),Candidate_4_NC_008752(para)	P18_yes_NC_002516|UD(5'(1-0)|3'(1-1))	-	-	-
Acidovorax_avenae_citrulli_AAC00-1	|	Candidate_21_NC_008752	|	Aave_0441		putative lipoprotein transmembrane	*	<<<	2	|	478861	478933	>>>	72	|	246	>>>	Aave_0442	anthranilate synthase component I	*	candidate	186	2.3e-22	F	1	-	Acidovorax_JS42_chromosome	-	0	-	Cobalamin1_NC_002516|3'(0)	-	-	-
Acidovorax_avenae_citrulli_AAC00-1	|	Candidate_31_NC_008752	|	Aave_0851		hypothetical protein	*	>>>	39	|	923022	923193	>>>	171	|	43	>>>	Aave_0852	phospho-2-dehydro-3-deoxyheptonate aldolase	*	candidate	512	2.7e-17	Y	1	-	Acidovorax_JS42_chromosome	-	0	-	P15_yes_NC_002516|3'(0)	5	-	-
Acidovorax_JS42	|	Candidate_6_NC_008766	|	Ajs_4306		parB-like partition proteins	*	>>>	1	|	50982	51050	>>>	68	|	131	>>>	Ajs_4307	hypothetical protein	*	candidate	210	3.6e-21	Z	2	-	Ralstonia_eutropha_JMP134_plasmid_1<>Burkholderia_cepacia_AMMD_plasmid_1	-	0	-	Cobalamin1_NC_002516|3'(0),P20_yes_NC_002516|3'(0)	-	-	-
Acidovorax_JS42	|	Candidate_7_NC_008766	|	Ajs_4306		parB-like partition proteins	*	>>>	1	|	50982	51085	>>>	103	|	96	>>>	Ajs_4307	hypothetical protein	*	candidate	210	3.6e-21	F	2	-	Ralstonia_eutropha_JMP134_plasmid_1<>Burkholderia_cepacia_AMMD_plasmid_1	-	0	-	Cobalamin1_NC_002516|3'(0),P20_yes_NC_002516|3'(0)	-	-	-
Acidovorax_JS42	|	Candidate_65_NC_008782	|	Ajs_3644		phospho-2-dehydro-3-deoxyheptonate aldolase	*	<<<	55	|	3852579	3852741	<<<	162	|	35	<<<	Ajs_3645	hypothetical protein	*	candidate	512	2.7e-17	Y	1	-	Acidovorax_avenae_citrulli_AAC00-1_chromosome	-	0	-	P15_yes_NC_002516|3'(0)	-	-	-
Acidovorax_JS42	|	Candidate_76_NC_008782	|	Ajs_4061		hypothetical protein	*	>>>	317	|	4326817	4327061	<<<	244	|	18	>>>	Ajs_4062	methyl-accepting chemotaxis sensory transducer	*	candidate	904	2.6e-35	X	1	RNA	Polaromonas_JS666_chromosome	-	46	Candidate_7_NC_008782(anti),Candidate_77_NC_008782(anti),Candidate_9_NC_008782(para),Candidate_86_NC_008782(para),Candidate_87_NC_008782(para),Candidate_17_NC_008782(para),Candidate_42_NC_008782(para),Candidate_43_NC_008782(para),Candidate_16_NC_008782(para),Candidate_47_NC_008782(para),Candidate_48_NC_008782(para),Candidate_12_NC_008782(para),Candidate_72_NC_008782(para),Candidate_73_NC_008782(p…	P24_yes_NC_002516|3'(0)	-	-	-
Acidovorax_JS42	|	Candidate_82_NC_008782	|	Ajs_4121		peptidase M20	*	<<<	20	|	4406176	4406505	<<<	329	|	0	<<<	Ajs_4122	diguanylate cyclase	*	candidate	870	8.8e-34	F	1	RNA	Polaromonas_JS666_chromosome	-	45	Candidate_8_NC_008782(anti),Candidate_84_NC_008782(anti),Candidate_5_NC_008782(para),Candidate_68_NC_008782(para),Candidate_69_NC_008782(para),Candidate_17_NC_008782(para),Candidate_42_NC_008782(para),Candidate_43_NC_008782(para),Candidate_9_NC_008782(para),Candidate_86_NC_008782(para),Candidate_87_NC_008782(para),Candidate_7_NC_008782(para),Candidate_76_NC_008782(para),Candidate_77_NC_008782(par…	Cobalamin1_NC_002516|3'(0)	5	RS	-
Acidovorax_JS42	|	Candidate_83_NC_008782	|	Ajs_4121		peptidase M20	*	<<<	122	|	4406278	4406505	<<<	227	|	0	<<<	Ajs_4122	diguanylate cyclase	*	candidate	870	8.8e-34	X	1	RNA	Polaromonas_JS666_chromosome	-	45	Candidate_8_NC_008782(anti),Candidate_84_NC_008782(anti),Candidate_5_NC_008782(para),Candidate_68_NC_008782(para),Candidate_69_NC_008782(para),Candidate_17_NC_008782(para),Candidate_42_NC_008782(para),Candidate_43_NC_008782(para),Candidate_9_NC_008782(para),Candidate_86_NC_008782(para),Candidate_87_NC_008782(para),Candidate_7_NC_008782(para),Candidate_76_NC_008782(para),Candidate_77_NC_008782(par…	Cobalamin1_NC_002516|3'(0)	-	-	-
Acinetobacter_baumannii_ATCC_17978	|	Candidate_20_NC_009085	|	A1S_2322		protein chain elongation factor EF-Ts	*	<<<	39	|	2689530	2689627	<<<	97	|	0	<<<	A1S_2323	30S ribosomal protein S2	*	candidate	529	8.7e-18	Z	1	RNA	Acinetobacter_sp_ADP1_chromosome	-	0	-	tff_t44_ECK0167_NC_000913|UD(5'(1-0)|3'(0-1))	-	-	-
Acinetobacter_baumannii_ATCC_17978	|	Candidate_22_NC_009085	|	A1S_0286		50S ribosomal protein	*	>>>	7	|	305320	305383	>>>	63	|	297	>>>	A1S_0287	RNA polymerase subunit B	*	candidate	1111	2e-44	Z	1	RNA	Acinetobacter_sp_ADP1_chromosome	-	0	Candidate_21_NC_009085(anti)	P26_yes_NC_002516|3'(0)	-	-	-E.coli_sig70_1(7.01|-77)
Acinetobacter_sp_ADP1	|	Candidate_19_NC_005966	|	ACIAD1878		3-deoxy-7-phosphoheptulonate synthase	*	<<<	168	|	1871610	1871871	<<<	261	|	116	<<<	ACIAD1879	glutathione-dependent formaldehyde	*	candidate	923	3.2e-36	Z	1	-	Acinetobacter_baumannii_ATCC_17978_chromosome	-	0	-	P15_yes_NC_002516|3'(0)	-	-	-E.coli_sig70_2(7.15|-170)
Acinetobacter_sp_ADP1	|	Candidate_20_NC_005966	|	ACIAD2268		elongation factor Ts	*	<<<	38	|	2239339	2239435	<<<	96	|	0	<<<	ACIAD2269	30S ribosomal protein S2	*	candidate	529	8.6e-18	Z	1	RNA	Acinetobacter_baumannii_ATCC_17978_chromosome	-	0	Candidate_3_NC_005966(anti)	tff_t44_ECK0167_NC_000913|UD(5'(1-0)|3'(0-1))	-	-	-
Acinetobacter_sp_ADP1	|	Candidate_27_NC_005966	|	ACIAD0306		50S ribosomal protein L7/L12	*	>>>	7	|	302156	302222	>>>	66	|	234	>>>	ACIAD0307	DNA-directed RNA polymerase beta chain	*	candidate	1111	1.7e-44	Z	1	RNA	Acinetobacter_baumannii_ATCC_17978_chromosome	-	0	Candidate_26_NC_005966(anti)	P26_yes_NC_002516|3'(0)	-	-	-
Actinobacillus_pleuropneumoniae_L20	|	Candidate_8_NC_009053	|	APL_1476		tyrosyl-tRNA synthetase	*	<<<	94	|	1691498	1691636	<<<	138	|	111	<<<	APL_1477	hypothetical protein	*	candidate	715	2.1e-26	B	1	RNA	Haemophilus_ducreyi_35000HP_chromosome	-	0	-	T1box18_NC_000964|3'(0)	-	-	-Multi_Fur(14.42|-73)Multi_Fur(17.74|-124)E.coli_sig70_2(7.94|-74)E.coli_sig70_2(8.53|-155)
Actinobacillus_pleuropneumoniae_L20	|	Candidate_14_NC_009053	|	APL_1905		Chaperone protein dnaJ	*	<<<	1	|	2136329	2136539	>>>	210	|	17	<<<	APL_1906	Chaperone protein dnaK	*	candidate	806	1.6e-30	X	1	RNA	Haemophilus_influenzae_PittGG_chromosome	-	0	-	SurC_NC_000964|UD(5'(0-0)|3'(0-0))	-	-	-
Actinobacillus_pleuropneumoniae_L20	|	Candidate_18_NC_009053	|	APL_0392		hypothetical protein	*	<<<	7	|	446613	447096	>>>	483	|	105	>>>	APL_0393	2-isopropylmalate synthase	*	candidate	551	1.3e-19	X	1	RNA	Haemophilus_ducreyi_35000HP_chromosome	-	0	-	C1_NC_002505|3'(0)	-	-	-E.coli_sig70_1(8.3|-169)
Actinobacillus_succinogenes_130Z	|	Candidate_10_NC_009655	|	Asuc_1328		glutaredoxin, GrxB family	*	>>>	16	|	1475280	1475360	>>>	80	|	59	>>>	Asuc_1329	threonyl-tRNA synthetase	*	candidate	612	1.2e-21	T	1	RNA	Mannheimia_succiniciproducens_MBEL55E_chromosome	-	1	Candidate_5_NC_009655(para)	T1box15_NC_000964|3'(0),T1box16_NC_000964|3'(0),T1box17_NC_000964|3'(0),T1box12_NC_000964|3'(0),T1box6_NC_003210|3'(0),T1box8_NC_002745|3'(0)	5	RS	-E.coli_sig70_2(7.26|-65)
Aeromonas_hydrophila_ATCC_7966	|	Candidate_11_NC_008570	|	AHA_3365		L-asparaginase I	*	<<<	123	|	3790310	3790605	>>>	295	|	95	>>>	AHA_3366	sodium/glutamate symporter	*	candidate	1327	2.6e-54	R	1	-	Aeromonas_salmonicida_A449_chromosome	-	0	Candidate_172_NC_008570(anti)	Qrr2_NC_002506|3'(0)	-	-	-
Aeromonas_hydrophila_ATCC_7966	|	Candidate_14_NC_008570	|	AHA_4071		ATP-dependent chaperone protein ClpB	*	<<<	22	|	4507703	4507826	<<<	123	|	25	<<<	AHA_4072	hypothetical protein	*	candidate	530	6.1e-18	R	1	-	Aeromonas_salmonicida_A449_chromosome	-	0	-	RyfD_NC_000913|UD(5'(0-0)|3'(0-0))	5	-	-
Aeromonas_hydrophila_ATCC_7966	|	Candidate_33_NC_008570	|	AHA_1173		ribosomal protein S2	*	>>>	1	|	1272164	1272239	>>>	75	|	27	>>>	AHA_1174	translation elongation factor Ts	*	candidate	511	7.4e-17	B	1	-	Aeromonas_salmonicida_A449_chromosome	-	0	-	tff_t44_ECK0167_NC_000913|UD(5'(1-0)|3'(0-1))	5	-	-
Aeromonas_hydrophila_ATCC_7966	|	Candidate_38_NC_008570	|	AHA_1579		sensor protein LuxQ	*	>>>	0	|	1729332	1729558	<<<	226	|	0	<<<	AHA_1580	ATP-dependent protease La (LON) domain protein	*	candidate	840	4.6e-32	B	1	RNA	Aeromonas_salmonicida_A449_chromosome	-	0	-	sraH_ryhA_NC_000913|3'(0)	-	-	-
Aeromonas_hydrophila_ATCC_7966	|	Candidate_41_NC_008570	|	AHA_1717		protein VisC	*	>>>	71	|	1881043	1881114	>>>	71	|	335	>>>	AHA_1718	glycine cleavage system T protein	*	candidate	629	8.4e-23	T	1	RNA	Aeromonas_salmonicida_A449_chromosome	-	0	-	gcvT1_NC_003112|3'(0),gcvT2_NC_003112|3'(0),gcvT1_NC_003047|3'(0),gcvT2_NC_003047|3'(0)	-	-	-
Aeromonas_hydrophila_ATCC_7966	|	Candidate_46_NC_008570	|	AHA_2210		adenine phosphoribosyltransferase	*	>>>	20	|	2434801	2434860	>>>	59	|	102	>>>	AHA_2211	DNA polymerase III, subunits gamma and tau	*	candidate	608	1.8e-21	T	1	-	Aeromonas_salmonicida_A449_chromosome	-	0	-	SRP_bact_NC_003047|3'(0),SRP_bact_NC_000964|3'(0)	-	-	-
Aeromonas_hydrophila_ATCC_7966	|	Candidate_52_NC_008570	|	AHA_2674		hypothetical protein	*	>>>	1	|	2984629	2984738	>>>	109	|	52	>>>	AHA_2675	hypothetical protein	*	candidate	601	4e-21	B	1	RNA	Aeromonas_salmonicida_A449_chromosome	-	0	-	P20_yes_NC_002516|3'(0)	5	-	-
Aeromonas_hydrophila_ATCC_7966	|	Candidate_53_NC_008570	|	AHA_2941		inner membrane transport protein YajR	*	<<<	101	|	3305896	3305983	<<<	87	|	0	<<<	AHA_2942	protoheme IX farnesyltransferase	*	candidate	550	7e-19	B	1	RNA	Aeromonas_salmonicida_A449_chromosome	-	0	Candidate_10_NC_008570(anti)	P20_yes_NC_002516|3'(0)	-	-	-
Aeromonas_hydrophila_ATCC_7966	|	Candidate_76_NC_008570	|	AHA_1310		formyltetrahydrofolate deformylase	*	<<<	1	|	1424295	1424355	>>>	60	|	396	>>>	AHA_1311	3,4-dihydroxy-2-butanone 4-phosphate synthase	*	candidate	504	3.4e-17	F	1	-	Aeromonas_salmonicida_A449_chromosome	-	0	-	SroG_NC_000913|3'(0),RFN_NC_002506|3'(0)	-	-	-
Aeromonas_hydrophila_ATCC_7966	|	Candidate_85_NC_008570	|	AHA_1475		cell volume regulation protein A	*	<<<	132	|	1609678	1609736	<<<	58	|	51	<<<	AHA_1476	hypothetical protein	*	candidate	525	6.4e-18	F	1	-	Aeromonas_salmonicida_A449_chromosome	-	0	-	SRP_bact_NC_003047|3'(0)	-	-	-
Aeromonas_hydrophila_ATCC_7966	|	Candidate_99_NC_008570	|	AHA_1752		ferredoxin, 2Fe-2S type, ISC system	*	>>>	1	|	1914892	1914991	>>>	99	|	56	>>>	AHA_1753	aminopeptidase B	*	candidate	657	1.2e-23	Y	1	-	Aeromonas_salmonicida_A449_chromosome	-	0	-	P20_yes_NC_002516|3'(0)	5	-	-
Aeromonas_hydrophila_ATCC_7966	|	Candidate_133_NC_008570	|	AHA_0267		hypothetical protein	*	>>>	2	|	290585	290706	>>>	121	|	666	<<<	AHA_0268	GTP-binding protein YihA	*	candidate	471	6.1e-16	Z	1	RNA	Aeromonas_salmonicida_A449_chromosome	-	1	Candidate_134_NC_008570(tandem)	spot42_NC_000913|3'(0)	-	-	-
Aeromonas_hydrophila_ATCC_7966	|	Candidate_165_NC_008570	|	AHA_3299		polyribonucleotide nucleotidyltransferase	*	<<<	1	|	3720544	3720692	>>>	148	|	17	<<<	AHA_3300	ribosomal protein S15	*	candidate	730	5.9e-27	X	1	RNA	Aeromonas_salmonicida_A449_chromosome	-	0	-	sraG_p3_NC_000913|UD(5'(0-0)|3'(0-0)),S15_NC_000913|3'(0),S15_NC_002516|3'(0)	-	-	-
Aeromonas_hydrophila_ATCC_7966	|	Candidate_213_NC_008570	|	AHA_4028		DNA-directed RNA polymerase, beta subunit	*	<<<	91	|	4471073	4471142	<<<	69	|	0	<<<	AHA_4029	ribosomal protein L7/L12	*	candidate	546	1.8e-18	Z	1	RNA	Aeromonas_salmonicida_A449_chromosome	-	0	-	P26_yes_NC_002516|UD(5'(1-1)|3'(0-0))	3	-	-
Aeromonas_hydrophila_ATCC_7966	|	Candidate_237_NC_008570	|	AHA_0628		pullulanase	*	>>>	2	|	675711	675830	>>>	119	|	70	<<<	AHA_0629	lead, cadmium, zinc and mercury transporting	*	candidate	591	9e-21	Y	1	RNA	Aeromonas_salmonicida_A449_chromosome	-	0	Candidate_28_NC_008570(anti)	Cobalamin1_NC_002516|3'(0)	-	-	-
Aeromonas_hydrophila_ATCC_7966	|	Candidate_247_NC_008570	|	AHA_0882		2-isopropylmalate synthase	*	<<<	49	|	953600	953955	<<<	355	|	2	>>>	AHA_0883	transcriptional regulator, TetR family protein	*	candidate	1842	1.4e-77	X	1	RNA	Aeromonas_salmonicida_A449_chromosome	-	0	Candidate_248_NC_008570(anti)	C1_NC_002505|UD(5'(1-1)|3'(0-0))	-	-	-
Aeromonas_hydrophila_ATCC_7966	|	Candidate_249_NC_008570	|	AHA_0886		hypothetical protein	*	>>>	6	|	956512	956738	>>>	226	|	156	>>>	AHA_0887	acetolactate synthase, large subunit,	*	candidate	1491	1.1e-61	F	1	RNA	Aeromonas_salmonicida_A449_chromosome	-	0	-	T1box11_NC_000964|3'(0)	-	-	-
Aeromonas_salmonicida_A449	|	Candidate_20_NC_009348	|	ASA_0943		sodium/glutamate symporter	*	<<<	96	|	971588	971886	<<<	298	|	16	>>>	ASA_0944	L-asparaginase I	*	candidate	1327	2.1e-54	R	1	-	Aeromonas_hydrophila_ATCC_7966_chromosome	-	0	-	Qrr2_NC_002506|3'(0)	-	-	-
Aeromonas_salmonicida_A449	|	Candidate_39_NC_009348	|	ASA_1647		dihydrodipicolinate reductase	*	>>>	59	|	1711331	1711694	>>>	363	|	253	>>>	ASA_1648	Carbamoylphosphate synthase small subunit	*	candidate	1683	1.3e-70	B	1	-	Aeromonas_hydrophila_ATCC_7966_chromosome	-	0	-	P32_yes_NC_002516|UD(5'(0-0)|3'(0-0))	-	-	-
Aeromonas_salmonicida_A449	|	Candidate_42_NC_009348	|	ASA_2088		DNA polymerase III, subunits gamma and tau	*	<<<	102	|	2222398	2222461	<<<	63	|	13	<<<	ASA_2089	adenine phosphoribosyltransferase	*	candidate	608	1.8e-21	T	1	RNA	Aeromonas_hydrophila_ATCC_7966_chromosome	-	0	-	SRP_bact_NC_003047|3'(0),SRP_bact_NC_000964|3'(0)	3	-	-
Aeromonas_salmonicida_A449	|	Candidate_49_NC_009348	|	ASA_2777		hypothetical protein	*	>>>	1	|	2974318	2974545	>>>	227	|	0	<<<	ASA_2778	two-component system hybrid sensor histidine	*	candidate	840	4.7e-32	B	1	RNA	Aeromonas_hydrophila_ATCC_7966_chromosome	-	0	-	sraH_ryhA_NC_000913|3'(0)	-	-	-
Aeromonas_salmonicida_A449	|	Candidate_55_NC_009348	|	ASA_3159		translation elongation factor Ts	*	<<<	27	|	3422152	3422228	<<<	76	|	0	<<<	ASA_3160	ribosomal protein S2	*	candidate	511	7.4e-17	B	1	-	Aeromonas_hydrophila_ATCC_7966_chromosome	-	0	-	tff_t44_ECK0167_NC_000913|UD(5'(1-0)|3'(0-1))	53	-	-
Aeromonas_salmonicida_A449	|	Candidate_65_NC_009348	|	ASA_1013		30S ribosomal protein S15	*	>>>	18	|	1042792	1042939	<<<	147	|	0	>>>	ASA_1014	polyribonucleotide nucleotidyltransferase	*	candidate	730	5.9e-27	X	1	RNA	Aeromonas_hydrophila_ATCC_7966_chromosome	-	0	-	sraG_p3_NC_000913|UD(5'(1-1)|3'(0-0)),rliD_NC_003210|UD(5'(0-0)|3'(0-0))	-	-	-
Aeromonas_salmonicida_A449	|	Candidate_73_NC_009348	|	ASA_1292		formyltetrahydrofolate deformylase	*	<<<	1	|	1344108	1344168	>>>	60	|	411	>>>	ASA_1293	3,4-dihydroxy-2-butanone 4-phosphate synthase	*	candidate	504	3.5e-17	F	1	-	Aeromonas_hydrophila_ATCC_7966_chromosome	-	0	-	SroG_NC_000913|3'(0),RFN_NC_002506|3'(0)	-	-	-
Aeromonas_salmonicida_A449	|	Candidate_82_NC_009348	|	ASA_1499		pseudogene	*	>>>	56	|	1566190	1566344	>>>	154	|	276	>>>	ASA_1500	magnesium transporter	*	candidate	1682	2e-70	F	1	-	Aeromonas_hydrophila_ATCC_7966_chromosome	-	0	-	ykoK_NC_002505|3'(0)	-	-	-
Aeromonas_salmonicida_A449	|	Candidate_129_NC_009348	|	ASA_2633		glycine cleavage system T protein	*	<<<	354	|	2817369	2817441	<<<	72	|	0	<<<	ASA_2634	VisC protein	*	candidate	629	7.5e-23	Y	1	-	Aeromonas_hydrophila_ATCC_7966_chromosome	-	0	-	gcvT1_NC_003112|3'(0),gcvT2_NC_003112|3'(0)	3	-	-
Aeromonas_salmonicida_A449	|	Candidate_134_NC_009348	|	ASA_0282		ribosomal protein L12	*	>>>	1	|	296551	296620	>>>	69	|	40	>>>	ASA_0283	DNA-directed RNA polymerase, beta subunit	*	candidate	546	1.3e-18	Z	1	RNA	Aeromonas_hydrophila_ATCC_7966_chromosome	-	0	-	P26_yes_NC_002516|UD(5'(0-0)|3'(1-1))	5	-	-
Aeromonas_salmonicida_A449	|	Candidate_156_NC_009348	|	ASA_0344		methyltransferase	*	>>>	564	|	358426	358479	<<<	53	|	310	>>>	ASA_0346	lateral flagellar motor switch protein, LfiM	*	candidate	650	7.1e-24	X	3	-	Burkholderia_pseudomallei_K96243_chromosome_1<>Idiomarina_loihiensis_L2TR_chromosome<>Burkholderia_pseudomallei_668_chromosome_1	-	0	Candidate_157_NC_009348(anti)	P28_yes_NC_002516|3'(0)	-	-	-
Aeromonas_salmonicida_A449	|	Candidate_164_NC_009348	|	ASA_3404		acetolactate synthase isozyme III, large	*	<<<	157	|	3686360	3686588	<<<	228	|	4	<<<	ASA_3405	hypothetical protein	*	candidate	1491	1.1e-61	F	1	-	Aeromonas_hydrophila_ATCC_7966_chromosome	-	0	-	T1box11_NC_000964|3'(0)	-	-	-
Aeromonas_salmonicida_A449	|	Candidate_166_NC_009348	|	ASA_3408		transcriptional regulator, TetR family	*	<<<	4	|	3689148	3689504	>>>	356	|	46	>>>	ASA_3409	2-isopropylmalate synthase	*	candidate	1842	1.4e-77	X	1	RNA	Aeromonas_hydrophila_ATCC_7966_chromosome	-	0	Candidate_165_NC_009348(anti)	C1_NC_002505|UD(5'(1-1)|3'(0-0))	5	-	-
Aeromonas_salmonicida_A449	|	Candidate_207_NC_009348	|	ASA_4129		GTP binding protein	*	>>>	689	|	4423550	4423672	<<<	122	|	0	<<<	ASA_4131	hypothetical protein	*	candidate	471	6.2e-16	Z	1	RNA	Aeromonas_hydrophila_ATCC_7966_chromosome	-	1	Candidate_206_NC_009348(tandem)	spot42_NC_000913|3'(0)	-	-	-
Aeromonas_salmonicida_A449	|	Candidate_224_NC_009348	|	ASA_0520		TonB domain protein	*	<<<	1	|	529808	529948	>>>	140	|	12	<<<	ASA_0521	lipid A biosynthesis lauroyl acyltransferase	*	candidate	508	6.9e-17	F	1	-	Aeromonas_hydrophila_ATCC_7966_chromosome	-	0	-	tpke70_NC_000913|3'(0)	-	-	-
Aeromonas_salmonicida_A449	|	Candidate_225_NC_009348	|	ASA_0628		pullulanase	*	>>>	2	|	643628	643747	>>>	119	|	85	<<<	ASA_0629	heavy metal transporting ATPase	*	candidate	591	9.7e-21	Y	1	RNA	Aeromonas_hydrophila_ATCC_7966_chromosome	-	0	Candidate_26_NC_009348(anti)	Cobalamin1_NC_002516|3'(0)	-	-	-
Anabaena_variabilis_ATCC_29413	|	Candidate_157_NC_007413	|	Ava_2653		inositol-5-monophosphate dehydrogenase	*	>>>	1	|	3283257	3283493	>>>	236	|	121	>>>	Ava_2654	Thioredoxin	*	candidate	1768	3.6e-74	T	1	-	Nostoc_sp_chromosome	-	0	-	yfr1_NC_005072|UD(5'(0-0)|3'(0-0))	-	-	-B.subtilis_sigA_1(9.14|-75)
Anabaena_variabilis_ATCC_29413	|	Candidate_177_NC_007413	|	Ava_3484		photosystem I subunit VII	*	>>>	1	|	4321825	4322002	>>>	177	|	123	>>>	Ava_3485	D-fructose-6-phosphate amidotransferase	*	candidate	1203	7.5e-49	T	1	RNA	Nostoc_sp_chromosome	-	0	-	glmS_NC_003210|3'(0),glmS_NC_002745|3'(0)	-	-	-
Anabaena_variabilis_ATCC_29413	|	Candidate_191_NC_007413	|	Ava_3819		Multi-sensor Hybrid Histidine Kinase	*	<<<	434	|	4756641	4757072	<<<	431	|	0	<<<	Ava_3820	hypothetical protein	*	candidate	3666	2.8e-160	T	1	RNA	Nostoc_sp_chromosome	-	0	-	sraH_ryhA_NC_000913|3'(0)	-	-	-
Anabaena_variabilis_ATCC_29413	|	Candidate_192_NC_007413	|	Ava_3819		Multi-sensor Hybrid Histidine Kinase	*	<<<	640	|	4756847	4757072	<<<	225	|	0	<<<	Ava_3820	hypothetical protein	*	candidate	3666	2.8e-160	T	1	RNA	Nostoc_sp_chromosome	-	0	-	sraH_ryhA_NC_000913|3'(0)	-	-	-
Anaeromyxobacter_dehalogenans_2CP-C	|	Candidate_1_NC_007760	|	Adeh_1179		aconitate hydratase 2	*	>>>	4	|	1360615	1360913	>>>	298	|	408	>>>	trRNA	trRNA	*	candidate	617	2.5e-22	B	1	-	Anaeromyxobacter_Fw109-5_chromosome	-	2	Candidate_6_NC_007760(opp),Candidate_10_NC_007760(para)	Cobalamin1_NC_002516|UD(5'(0-0)|3'(1-0))	-	-	-
Anaeromyxobacter_dehalogenans_2CP-C	|	Candidate_2_NC_007760	|	trRNA		trRNA	*	>>>	5	|	1362869	1362993	>>>	124	|	63	>>>	trRNA	trRNA	*	candidate	581	2.7e-20	T	1	RNA	Anaeromyxobacter_Fw109-5_chromosome	-	0	-	Cobalamin1_NC_002516|UD(5'(0-0)|3'(1-0))	5	-	-
Anaeromyxobacter_dehalogenans_2CP-C	|	Candidate_5_NC_007760	|	Adeh_1046		5-formyltetrahydrofolate cyclo-ligase	*	<<<	29	|	1202614	1202862	>>>	248	|	243	>>>	Adeh_1047	serine/threonine protein kinase	*	candidate	1015	3.4e-40	X	1	RNA	Anaeromyxobacter_Fw109-5_chromosome	-	0	-	P20_yes_NC_002516|3'(0)	-	-	-
Anaeromyxobacter_dehalogenans_2CP-C	|	Candidate_6_NC_007760	|	Adeh_1179		aconitate hydratase 2	*	>>>	392	|	1361003	1361318	<<<	315	|	3	>>>	trRNA	trRNA	*	candidate	617	2.5e-22	X	1	RNA	Anaeromyxobacter_Fw109-5_chromosome	-	1	Candidate_1_NC_007760(opp)	P34_yes_NC_002516|3'(0)	-	-	-
Anaeromyxobacter_dehalogenans_2CP-C	|	Candidate_8_NC_007760	|	Adeh_1591		ribosomal protein L7/L12	*	>>>	15	|	1819538	1819711	>>>	173	|	34	>>>	Adeh_1592	DNA-directed RNA polymerase, beta subunit	*	candidate	618	5.3e-22	F	1	RNA	Anaeromyxobacter_Fw109-5_chromosome	-	0	-	P26_yes_NC_002516|UD(5'(0-0)|3'(0-0)),Cobalamin1_NC_002516|3'(0),P11_yes_NC_002516|3'(0)	5	-	-
Anaeromyxobacter_dehalogenans_2CP-C	|	Candidate_9_NC_007760	|	Adeh_1593		DNA-directed RNA polymerase, subunit beta-prime	*	>>>	4	|	1828304	1828372	>>>	68	|	356	>>>	Adeh_1594	sigma 32 (RpoH)	*	candidate	490	1.6e-16	Z	1	RNA	Anaeromyxobacter_Fw109-5_chromosome	-	0	-	P15_yes_NC_002516|3'(0)	-	-	-
Anaeromyxobacter_dehalogenans_2CP-C	|	Candidate_10_NC_007760	|	Adeh_0161		ROK	*	>>>	97	|	185664	186096	>>>	432	|	17	>>>	Adeh_0162	hypothetical protein	*	candidate	641	2.2e-23	Y	1	RNA	Anaeromyxobacter_Fw109-5_chromosome	-	1	Candidate_1_NC_007760(para)	yybP1ykoY_NC_002516|UD(5'(0-1)|3'(0-1)),P20_yes_NC_002516|3'(0),Cobalamin1_NC_002516|3'(0),Cobalamin4_NC_002516|3'(0),SRP_bact_NC_003047|3'(0),P24_yes_NC_002516|3'(0)	5	RS	-
Anaeromyxobacter_Fw109-5	|	Candidate_4_NC_009675	|	Anae109_0170		MotA/TolQ/ExbB proton channel	*	<<<	19	|	197268	197703	>>>	435	|	20	>>>	Anae109_0171	protein of unknown function DUF814	*	candidate	641	1.9e-23	F	1	RNA	Anaeromyxobacter_dehalogenans_2CP-C_chromosome	-	0	-	Cobalamin1_NC_002516|3'(0),SRP_bact_NC_003047|3'(0),P15_yes_NC_002516|3'(0)	5	-	-
Anaeromyxobacter_Fw109-5	|	Candidate_6_NC_009675	|	Anae109_2339		tRNA(Ile)-lysidine synthetase	*	<<<	32	|	2705693	2705959	>>>	266	|	232	>>>	Anae109_2340	hypothetical protein	*	candidate	697	6e-26	X	1	RNA	Anaeromyxobacter_dehalogenans_2CP-C_chromosome	-	0	-	Cobalamin1_NC_002516|UD(5'(0-0)|3'(1-1))	-	-	-
Arthrobacter_aurescens_TC1	|	Candidate_13_NC_008711	|	AAur_2509		acetolactate synthase, large subunit,	*	<<<	51	|	2759346	2759542	<<<	196	|	46	<<<	AAur_2510	dihydroxy-acid dehydratase	*	candidate	309	5.9e-26	F	1	RNA	Arthrobacter_FB24_chromosome_1	-	0	-	T1box11_NC_000964|3'(0)	-	-	-
Arthrobacter_aurescens_TC1	|	Candidate_18_NC_008711	|	AAur_3021		putative ATP-dependent RNA helicase	*	<<<	203	|	3299968	3300143	<<<	175	|	7	<<<	AAur_3022	putative MOSC domain protein	*	candidate	1052	6.5e-42	X	1	RNA	Arthrobacter_FB24_chromosome_1	-	0	-	C0343_NC_000913|3'(0)	-	-	-
Arthrobacter_FB24	|	Candidate_16_NC_008541	|	Arth_2539		acetolactate synthase, large subunit,	*	<<<	69	|	2848320	2848533	<<<	213	|	98	<<<	Arth_2540	dihydroxy-acid dehydratase	*	candidate	309	7.7e-26	F	1	RNA	Arthrobacter_aurescens_TC1_chromosome	-	0	-	T1box11_NC_000964|3'(0)	-	-	-
Bacillus_amyloliquefaciens_FZB42	|	Candidate_1_NC_009725	|	RBAM_002310		hypothetical protein	*	>>>	1	|	203976	204069	>>>	93	|	50	>>>	RBAM_002320	GlmS	*	candidate	499	6.1e-17	R	3	RNA	Bacillus_subtilis_chromosome<>Bacillus_licheniformis_ATCC_14580_chromosome<>Bacillus_licheniformis_DSM_13_chromosome	-	0	-	glmS_NC_003210|3'(0),glmS_NC_002745|3'(0)	5	-	-
Bacillus_amyloliquefaciens_FZB42	|	Candidate_24_NC_009725	|	RBAM_001310		YbxB	*	>>>	4	|	122395	122553	>>>	158	|	72	>>>	RBAM_001320	RpoB	*	candidate	959	1.8e-37	T	3	RNA	Bacillus_subtilis_chromosome<>Bacillus_licheniformis_ATCC_14580_chromosome<>Bacillus_licheniformis_DSM_13_chromosome	-	0	-	P26_yes_NC_002516|UD(5'(1-0)|3'(0-0))	5	-	-B.subtilis_sigG_2(9.18|-53)B.subtilis_sigA_2(9.27|-137)
Bacillus_amyloliquefaciens_FZB42	|	Candidate_49_NC_009725	|	RBAM_020840		TrpE	*	<<<	61	|	2183983	2184106	<<<	123	|	59	<<<	RBAM_020850	AroH	*	candidate	516	2.1e-17	B	1	RNA	Bacillus_subtilis_chromosome	-	0	-	T1box8_NC_003210|3'(0),T1box9_NC_003210|3'(0)	-	-	-
Bacillus_amyloliquefaciens_FZB42	|	Candidate_68_NC_009725	|	trRNA		trRNA	*	>>>	231	|	1164443	1164791	<<<	348	|	0	<<<	RBAM_011960	hypothetical protein RBAM	*	candidate	546	9.2e-19	Y	2	COD	Bacillus_anthracis_Ames_chromosome<>Bacillus_anthracis_Ames_0581_chromosome	-	0	-	S_box2_NC_000964|3'(0)	-	-	-
Bacillus_amyloliquefaciens_FZB42	|	Candidate_82_NC_009725	|	RBAM_016520		RpsO	*	>>>	2	|	1654191	1654362	<<<	171	|	0	>>>	RBAM_016530	PnpA	*	candidate	711	4.1e-26	X	1	RNA	Bacillus_subtilis_chromosome	-	0	-	rliD_NC_003210|UD(5'(1-1)|3'(0-0)),sraG_p3_NC_000913|UD(5'(0-0)|3'(0-0))	-	-	-
Bacillus_amyloliquefaciens_FZB42	|	Candidate_132_NC_009725	|	RBAM_006390		Gcp	*	>>>	1	|	613882	614105	>>>	223	|	-2	<<<	RBAM_006400	YdiF	*	candidate	565	1.2e-19	F	1	-	Bacillus_subtilis_chromosome	-	0	-	rliI_NC_003210|3'(0)	-	-	-B.subtilis_sigA_2(10.24|-278)
Bacillus_anthracis_Ames	|	Candidate_166_NC_003997	|	BA0101		ybxB protein	*	>>>	1	|	108100	108363	>>>	263	|	27	>>>	BA0102	DNA-directed RNA polymerase beta subunit	*	candidate	1225	2.9e-49	T	6	RNA	Bacillus_cereus_ATCC_10987_chromosome<>Bacillus_cereus_ATCC14579_chromosome<>Bacillus_thuringiensis_konkukian_chromosome<>Bacillus_cereus_ZK_chromosome<>Bacillus_thuringiensis_Al_Hakam_chromosome<>Bacillus_cereus_cytotoxis_NVH_391-98_chromosome	-	0	-	P26_yes_NC_002516|UD(5'(1-0)|3'(0-0))	5	-	-B.subtilis_sigG_2(9.24|-170)B.subtilis_sigA_1(9.03|-218)B.subtilis_sigA_1(9.58|-163)
Bacillus_anthracis_Ames	|	Candidate_176_NC_003997	|	BA0226		hypothetical protein	*	>>>	519	|	216315	216373	>>>	58	|	64	>>>	BA0228	ABC transporter, ATP-binding protein	*	candidate	602	4.8e-21	T	3	RNA	Bacillus_cereus_ATCC14579_chromosome<>Bacillus_thuringiensis_konkukian_chromosome<>Bacillus_cereus_ZK_chromosome	-	0	-	rliI_NC_003210|3'(0)	5	-	-
Bacillus_anthracis_Ames	|	Candidate_177_NC_003997	|	BA0226		hypothetical protein	*	>>>	519	|	216315	216416	>>>	101	|	21	>>>	BA0228	ABC transporter, ATP-binding protein	*	candidate	602	4.8e-21	B	3	RNA	Bacillus_cereus_ATCC14579_chromosome<>Bacillus_thuringiensis_konkukian_chromosome<>Bacillus_cereus_ZK_chromosome	-	0	-	rliI_NC_003210|3'(0)	5	-	-
Bacillus_anthracis_Ames	|	Candidate_182_NC_003997	|	BA0261		O-sialoglycoprotein endopeptidase	*	>>>	1	|	253956	254021	>>>	65	|	414	<<<	BA0262	ABC transporter, ATP-binding protein	*	candidate	774	2.6e-29	T	5	RNA	Bacillus_cereus_ATCC14579_chromosome<>Bacillus_thuringiensis_konkukian_chromosome<>Bacillus_cereus_ZK_chromosome<>Bacillus_thuringiensis_Al_Hakam_chromosome<>Bacillus_cereus_cytotoxis_NVH_391-98_chromosome	-	0	Candidate_181_NC_003997(anti)	rliI_NC_003210|3'(0)	-	-	-
Bacillus_anthracis_Ames	|	Candidate_411_NC_003997	|	BA3440		oxidoreductase, short chain	*	<<<	490	|	3163457	3163553	<<<	96	|	0	<<<	BA3442	neutral protease	*	candidate	2684	9.2e-116	B	3	RNA	Bacillus_cereus_ATCC14579_chromosome<>Bacillus_thuringiensis_konkukian_chromosome<>Bacillus_cereus_ZK_chromosome	-	0	-	tmRNA_NC_000964|3'(0)	-	-	-B.subtilis_sigG_2(9.18|-92)
Bacillus_anthracis_Ames	|	Candidate_424_NC_003997	|	BA3516		amino acid permease family protein	*	<<<	336	|	3229220	3229363	<<<	143	|	149	<<<	BA3518	drug resistance transporter, Bcr/CflA family	*	candidate	1688	9.5e-71	B	5	RNA	Bacillus_cereus_ATCC_10987_chromosome<>Bacillus_cereus_ATCC14579_chromosome<>Bacillus_thuringiensis_konkukian_chromosome<>Bacillus_cereus_ZK_chromosome<>Bacillus_thuringiensis_Al_Hakam_chromosome	-	0	-	Lysine_NC_003210|3'(0),Lysine2_NC_002745|3'(0)	-	-	-
Bacillus_anthracis_Ames	|	Candidate_451_NC_003997	|	BA3954		hypothetical protein	*	<<<	221	|	3629279	3629389	<<<	110	|	0	<<<	BA3955	DNA polymerase III subunit alpha	*	candidate	1290	1.5e-52	B	6	RNA	Bacillus_cereus_ATCC_10987_chromosome<>Bacillus_cereus_ATCC14579_chromosome<>Bacillus_thuringiensis_konkukian_chromosome<>Bacillus_cereus_ZK_chromosome<>Bacillus_thuringiensis_Al_Hakam_chromosome<>Bacillus_cereus_cytotoxis_NVH_391-98_chromosome	-	1	Candidate_45_NC_003997(anti),Candidate_394_NC_003997(para)	polC-ylxS_NC_000964|UD(5'(1-1)|3'(0-0))	-	-	-
Bacillus_anthracis_Ames	|	Candidate_465_NC_003997	|	BA4217		hypothetical protein	*	>>>	1	|	3858924	3859032	>>>	108	|	507	>>>	BA4218	5-methyltetrahydropteroyltriglutamate--	*	candidate	597	3.2e-113	T	2	RNA	Bacillus_cereus_ATCC_10987_chromosome<>Bacillus_cereus_ZK_chromosome	-	0	-	S_box6_NC_003210|3'(0),S_box3_NC_000964|3'(0)	-	-	-B.subtilis_sigG_2(9.32|-97)B.subtilis_sigA_1(9.71|-256)
Bacillus_anthracis_Ames	|	Candidate_480_NC_003997	|	BA4629		prespore-specific transcriptional regulator	*	>>>	-3	|	4206166	4206394	<<<	228	|	68	<<<	BA4630	hesA/moeB/thiF family protein	*	candidate	525	3.1e-18	T	4	RNA	Bacillus_cereus_ATCC14579_chromosome<>Bacillus_thuringiensis_konkukian_chromosome<>Bacillus_cereus_ZK_chromosome<>Bacillus_thuringiensis_Al_Hakam_chromosome	-	26	Candidate_481_NC_003997(anti),Candidate_543_NC_003997(para),Candidate_696_NC_003997(para),Candidate_416_NC_003997(para),Candidate_280_NC_003997(para),Candidate_630_NC_003997(para),Candidate_686_NC_003997(para),Candidate_687_NC_003997(para),Candidate_218_NC_003997(para),Candidate_219_NC_003997(para),Candidate_512_NC_003997(para),Candidate_684_NC_003997(para),Candidate_551_NC_003997(para),Candidate…	6S_NC_002745|UD(5'(1-1)|3'(1-1))	-	-	-
Bacillus_anthracis_Ames	|	Candidate_481_NC_003997	|	BA4629		prespore-specific transcriptional regulator	*	>>>	48	|	4206217	4206461	>>>	244	|	1	<<<	BA4630	hesA/moeB/thiF family protein	*	candidate	507	5.2e-17	T	3	RNA	Bacillus_thuringiensis_konkukian_chromosome<>Bacillus_cereus_ZK_chromosome<>Bacillus_thuringiensis_Al_Hakam_chromosome	-	26	Candidate_480_NC_003997(anti),Candidate_543_NC_003997(para),Candidate_696_NC_003997(para),Candidate_416_NC_003997(para),Candidate_280_NC_003997(para),Candidate_630_NC_003997(para),Candidate_686_NC_003997(para),Candidate_687_NC_003997(para),Candidate_218_NC_003997(para),Candidate_219_NC_003997(para),Candidate_512_NC_003997(para),Candidate_684_NC_003997(para),Candidate_551_NC_003997(para),Candidate…	6S_NC_002745|3'(0)	-	-	-B.subtilis_sigG_1(8.81|-211)B.subtilis_sigA_3(9.4|-173)
Bacillus_anthracis_Ames	|	Candidate_527_NC_003997	|	BA5408		FMN reductase, NADPH-dependent	*	>>>	2	|	4897241	4897502	>>>	261	|	1	>>>	BA5409	macrolide efflux pump, putative	*	candidate	1311	2.1e-53	B	3	RNA	Bacillus_cereus_ATCC14579_chromosome<>Bacillus_thuringiensis_konkukian_chromosome<>Bacillus_cereus_ZK_chromosome	-	0	-	rliI_NC_003210|3'(0)	5	-	-B.subtilis_sigG_1(9.3|-218)B.subtilis_sigG_1(8.37|-131)B.subtilis_sigA_3(11.58|-231)
Bacillus_anthracis_Ames	|	Candidate_649_NC_003997	|	BA3954		hypothetical protein	*	<<<	87	|	3629145	3629389	<<<	244	|	0	<<<	BA3955	DNA polymerase III subunit alpha	*	candidate	1290	1.5e-52	X	6	RNA	Bacillus_cereus_ATCC_10987_chromosome<>Bacillus_cereus_ATCC14579_chromosome<>Bacillus_thuringiensis_konkukian_chromosome<>Bacillus_cereus_ZK_chromosome<>Bacillus_thuringiensis_Al_Hakam_chromosome<>Bacillus_cereus_cytotoxis_NVH_391-98_chromosome	-	1	Candidate_45_NC_003997(anti),Candidate_394_NC_003997(para)	polC-ylxS_NC_000964|UD(5'(1-1)|3'(0-0))	-	RS	-
Bacillus_anthracis_Ames	|	Candidate_670_NC_003997	|	BA4599		aldehyde-alcohol dehydrogenase	*	<<<	1	|	4178940	4179197	>>>	257	|	0	<<<	BA4600	cystathionine beta-lyase	*	candidate	1199	2.5e-48	X	5	RNA	Bacillus_cereus_ATCC_10987_chromosome<>Bacillus_cereus_ATCC14579_chromosome<>Bacillus_thuringiensis_konkukian_chromosome<>Bacillus_cereus_ZK_chromosome<>Bacillus_thuringiensis_Al_Hakam_chromosome	-	0	-	S_box3_NC_003210|3'(0)	-	-	-
Bacillus_anthracis_Ames	|	Candidate_681_NC_003997	|	BA4819		translation initiation factor IF-3	*	<<<	28	|	4381224	4381532	>>>	308	|	-1	<<<	BA4820	threonyl-tRNA synthetase	*	candidate	923	6.6e-36	X	6	RNA	Bacillus_cereus_ATCC_10987_chromosome<>Bacillus_cereus_ATCC14579_chromosome<>Bacillus_thuringiensis_konkukian_chromosome<>Bacillus_cereus_ZK_chromosome<>Bacillus_thuringiensis_Al_Hakam_chromosome<>Bacillus_cereus_cytotoxis_NVH_391-98_chromosome	-	0	L20_leader_NC_003997(anti)	T1box12_NC_000964|3'(0),T1box6_NC_003210|3'(0),T1box8_NC_002745|3'(0),T1box15_NC_000964|3'(0),T1box16_NC_000964|3'(0),T1box17_NC_000964|3'(0)	-	-	-B.subtilis_sigG_3(8.55|-283)
Bacillus_anthracis_Ames	|	L20_leader_NC_003997	|	BA4819		translation initiation factor IF-3	*	<<<	11	|	4381207	4381482	<<<	275	|	49	<<<	BA4820	threonyl-tRNA synthetase	*	L20_leader	923	6.6e-36	Z	6	RNA	Bacillus_cereus_ATCC_10987_chromosome<>Bacillus_cereus_ATCC14579_chromosome<>Bacillus_thuringiensis_konkukian_chromosome<>Bacillus_cereus_ZK_chromosome<>Bacillus_thuringiensis_Al_Hakam_chromosome<>Bacillus_cereus_cytotoxis_NVH_391-98_chromosome	-	0	Candidate_681_NC_003997(anti)	Lysine2_NC_002745|UD(5'(0-0)|3'(0-1)),lhrB_NC_003210|3'(0)	5	-	-B.subtilis_sigA_2(9.91|-142)B.subtilis_sigA_2(9.56|-205)
Bacillus_anthracis_Ames_0581	|	Candidate_166_NC_007530	|	GBAA0101		ybxb protein	*	>>>	1	|	108100	108363	>>>	263	|	27	>>>	GBAA0102	DNA-directed RNA polymerase beta subunit	*	candidate	1225	2.9e-49	T	6	RNA	Bacillus_cereus_ATCC_10987_chromosome<>Bacillus_cereus_ATCC14579_chromosome<>Bacillus_thuringiensis_konkukian_chromosome<>Bacillus_cereus_ZK_chromosome<>Bacillus_thuringiensis_Al_Hakam_chromosome<>Bacillus_cereus_cytotoxis_NVH_391-98_chromosome	-	0	-	P26_yes_NC_002516|UD(5'(1-0)|3'(0-0))	5	-	-B.subtilis_sigG_2(9.24|-170)B.subtilis_sigA_1(9.03|-218)B.subtilis_sigA_1(9.58|-163)
Bacillus_anthracis_Ames_0581	|	Candidate_176_NC_007530	|	GBAA0226		hypothetical protein	*	>>>	519	|	216315	216373	>>>	58	|	64	>>>	GBAA0228	abc transporter, atp-binding protein	*	candidate	602	4.8e-21	T	3	RNA	Bacillus_cereus_ATCC14579_chromosome<>Bacillus_thuringiensis_konkukian_chromosome<>Bacillus_cereus_ZK_chromosome	-	0	-	rliI_NC_003210|3'(0)	5	-	-
Bacillus_anthracis_Ames_0581	|	Candidate_177_NC_007530	|	GBAA0226		hypothetical protein	*	>>>	519	|	216315	216416	>>>	101	|	21	>>>	GBAA0228	abc transporter, atp-binding protein	*	candidate	602	4.8e-21	B	3	RNA	Bacillus_cereus_ATCC14579_chromosome<>Bacillus_thuringiensis_konkukian_chromosome<>Bacillus_cereus_ZK_chromosome	-	0	-	rliI_NC_003210|3'(0)	5	-	-
Bacillus_anthracis_Ames_0581	|	Candidate_182_NC_007530	|	GBAA0261		o-sialoglycoprotein endopeptidase	*	>>>	1	|	253956	254021	>>>	65	|	414	<<<	GBAA0262	abc transporter, atp-binding protein	*	candidate	774	2.6e-29	T	5	RNA	Bacillus_cereus_ATCC14579_chromosome<>Bacillus_thuringiensis_konkukian_chromosome<>Bacillus_cereus_ZK_chromosome<>Bacillus_thuringiensis_Al_Hakam_chromosome<>Bacillus_cereus_cytotoxis_NVH_391-98_chromosome	-	0	Candidate_181_NC_007530(anti)	rliI_NC_003210|3'(0)	-	-	-
Bacillus_anthracis_Ames_0581	|	Candidate_412_NC_007530	|	GBAA3440		oxidoreductase, short chain	*	<<<	490	|	3163584	3163680	<<<	96	|	0	<<<	GBAA3442	neutral protease	*	candidate	2684	9.2e-116	B	3	RNA	Bacillus_cereus_ATCC14579_chromosome<>Bacillus_thuringiensis_konkukian_chromosome<>Bacillus_cereus_ZK_chromosome	-	0	-	tmRNA_NC_000964|3'(0)	-	-	-B.subtilis_sigG_2(9.18|-92)
Bacillus_anthracis_Ames_0581	|	Candidate_425_NC_007530	|	GBAA3516		amino acid permease family protein	*	<<<	336	|	3229347	3229490	<<<	143	|	149	<<<	GBAA3518	drug resistance transporter, bcr/cfla family	*	candidate	1688	9.5e-71	B	5	RNA	Bacillus_cereus_ATCC_10987_chromosome<>Bacillus_cereus_ATCC14579_chromosome<>Bacillus_thuringiensis_konkukian_chromosome<>Bacillus_cereus_ZK_chromosome<>Bacillus_thuringiensis_Al_Hakam_chromosome	-	0	-	Lysine_NC_003210|3'(0),Lysine2_NC_002745|3'(0)	-	-	-
Bacillus_anthracis_Ames_0581	|	Candidate_452_NC_007530	|	GBAA3954		hypothetical protein	*	<<<	221	|	3629406	3629516	<<<	110	|	0	<<<	GBAA3955	DNA polymerase III subunit alpha	*	candidate	1290	1.5e-52	B	6	RNA	Bacillus_cereus_ATCC_10987_chromosome<>Bacillus_cereus_ATCC14579_chromosome<>Bacillus_thuringiensis_konkukian_chromosome<>Bacillus_cereus_ZK_chromosome<>Bacillus_thuringiensis_Al_Hakam_chromosome<>Bacillus_cereus_cytotoxis_NVH_391-98_chromosome	-	1	Candidate_45_NC_007530(anti),Candidate_395_NC_007530(para)	polC-ylxS_NC_000964|UD(5'(1-1)|3'(0-0))	-	-	-
Bacillus_anthracis_Ames_0581	|	Candidate_466_NC_007530	|	GBAA4217		hypothetical protein	*	>>>	1	|	3859051	3859159	>>>	108	|	507	>>>	GBAA4218	5-methyltetrahydropteroyltriglutamate--	*	candidate	597	3.2e-113	T	2	RNA	Bacillus_cereus_ATCC_10987_chromosome<>Bacillus_cereus_ZK_chromosome	-	0	-	S_box6_NC_003210|3'(0),S_box3_NC_000964|3'(0)	-	-	-B.subtilis_sigG_2(9.32|-97)B.subtilis_sigA_1(9.71|-256)
Bacillus_anthracis_Ames_0581	|	Candidate_481_NC_007530	|	GBAA4629		prespore-specific transcriptional regulator	*	>>>	-3	|	4206293	4206521	<<<	228	|	68	<<<	GBAA4630	hesa/moeb/thif family protein	*	candidate	525	3.1e-18	T	4	RNA	Bacillus_cereus_ATCC14579_chromosome<>Bacillus_thuringiensis_konkukian_chromosome<>Bacillus_cereus_ZK_chromosome<>Bacillus_thuringiensis_Al_Hakam_chromosome	-	26	Candidate_482_NC_007530(anti),Candidate_544_NC_007530(para),Candidate_696_NC_007530(para),Candidate_417_NC_007530(para),Candidate_281_NC_007530(para),Candidate_630_NC_007530(para),Candidate_686_NC_007530(para),Candidate_687_NC_007530(para),Candidate_218_NC_007530(para),Candidate_219_NC_007530(para),Candidate_513_NC_007530(para),Candidate_684_NC_007530(para),Candidate_552_NC_007530(para),Candidate…	6S_NC_002745|UD(5'(1-1)|3'(1-1))	-	-	-
Bacillus_anthracis_Ames_0581	|	Candidate_482_NC_007530	|	GBAA4629		prespore-specific transcriptional regulator	*	>>>	48	|	4206344	4206588	>>>	244	|	1	<<<	GBAA4630	hesa/moeb/thif family protein	*	candidate	507	5.2e-17	T	3	RNA	Bacillus_thuringiensis_konkukian_chromosome<>Bacillus_cereus_ZK_chromosome<>Bacillus_thuringiensis_Al_Hakam_chromosome	-	26	Candidate_481_NC_007530(anti),Candidate_544_NC_007530(para),Candidate_696_NC_007530(para),Candidate_417_NC_007530(para),Candidate_281_NC_007530(para),Candidate_630_NC_007530(para),Candidate_686_NC_007530(para),Candidate_687_NC_007530(para),Candidate_218_NC_007530(para),Candidate_219_NC_007530(para),Candidate_513_NC_007530(para),Candidate_684_NC_007530(para),Candidate_552_NC_007530(para),Candidate…	6S_NC_002745|3'(0)	-	-	-B.subtilis_sigG_1(8.81|-211)B.subtilis_sigA_3(9.4|-173)
Bacillus_anthracis_Ames_0581	|	Candidate_528_NC_007530	|	GBAA5408		fmn reductase, nadph-dependent	*	>>>	2	|	4897367	4897628	>>>	261	|	1	>>>	GBAA5409	macrolide efflux pump, putative	*	candidate	1311	2.1e-53	B	3	RNA	Bacillus_cereus_ATCC14579_chromosome<>Bacillus_thuringiensis_konkukian_chromosome<>Bacillus_cereus_ZK_chromosome	-	0	-	rliI_NC_003210|3'(0)	5	-	-B.subtilis_sigG_1(9.3|-218)B.subtilis_sigG_1(8.37|-131)B.subtilis_sigA_3(11.58|-231)
Bacillus_anthracis_Ames_0581	|	Candidate_649_NC_007530	|	GBAA3954		hypothetical protein	*	<<<	87	|	3629272	3629516	<<<	244	|	0	<<<	GBAA3955	DNA polymerase III subunit alpha	*	candidate	1290	1.5e-52	X	6	RNA	Bacillus_cereus_ATCC_10987_chromosome<>Bacillus_cereus_ATCC14579_chromosome<>Bacillus_thuringiensis_konkukian_chromosome<>Bacillus_cereus_ZK_chromosome<>Bacillus_thuringiensis_Al_Hakam_chromosome<>Bacillus_cereus_cytotoxis_NVH_391-98_chromosome	-	1	Candidate_45_NC_007530(anti),Candidate_395_NC_007530(para)	polC-ylxS_NC_000964|UD(5'(1-1)|3'(0-0))	-	RS	-
Bacillus_anthracis_Ames_0581	|	Candidate_670_NC_007530	|	GBAA4599		aldehyde-alcohol dehydrogenase	*	<<<	1	|	4179067	4179324	>>>	257	|	0	<<<	GBAA4600	cystathionine beta-lyase	*	candidate	1199	2.5e-48	X	5	RNA	Bacillus_cereus_ATCC_10987_chromosome<>Bacillus_cereus_ATCC14579_chromosome<>Bacillus_thuringiensis_konkukian_chromosome<>Bacillus_cereus_ZK_chromosome<>Bacillus_thuringiensis_Al_Hakam_chromosome	-	0	-	S_box3_NC_003210|3'(0)	-	-	-
Bacillus_anthracis_Ames_0581	|	Candidate_681_NC_007530	|	GBAA4819		translation initiation factor IF-3	*	<<<	28	|	4381351	4381659	>>>	308	|	-1	<<<	GBAA4820	threonyl-tRNA synthetase	*	candidate	923	6.6e-36	X	6	RNA	Bacillus_cereus_ATCC_10987_chromosome<>Bacillus_cereus_ATCC14579_chromosome<>Bacillus_thuringiensis_konkukian_chromosome<>Bacillus_cereus_ZK_chromosome<>Bacillus_thuringiensis_Al_Hakam_chromosome<>Bacillus_cereus_cytotoxis_NVH_391-98_chromosome	-	0	L20_leader_NC_007530(anti)	T1box12_NC_000964|3'(0),T1box6_NC_003210|3'(0),T1box8_NC_002745|3'(0),T1box15_NC_000964|3'(0),T1box16_NC_000964|3'(0),T1box17_NC_000964|3'(0)	-	-	-B.subtilis_sigG_3(8.55|-283)
Bacillus_anthracis_Ames_0581	|	L20_leader_NC_007530	|	GBAA4819		translation initiation factor IF-3	*	<<<	11	|	4381334	4381609	<<<	275	|	49	<<<	GBAA4820	threonyl-tRNA synthetase	*	L20_leader	923	6.6e-36	Z	6	RNA	Bacillus_cereus_ATCC_10987_chromosome<>Bacillus_cereus_ATCC14579_chromosome<>Bacillus_thuringiensis_konkukian_chromosome<>Bacillus_cereus_ZK_chromosome<>Bacillus_thuringiensis_Al_Hakam_chromosome<>Bacillus_cereus_cytotoxis_NVH_391-98_chromosome	-	0	Candidate_681_NC_007530(anti)	Lysine2_NC_002745|UD(5'(0-0)|3'(0-1)),lhrB_NC_003210|3'(0)	5	-	-B.subtilis_sigA_2(9.91|-142)B.subtilis_sigA_2(9.56|-205)
Bacillus_anthracis_str_Sterne	|	Candidate_128_NC_005945	|	BAS2027		isoleucyl-tRNA synthetase	*	>>>	7	|	2036062	2036321	<<<	259	|	53	>>>	BAS2028	neutral metalloprotease, putative	*	candidate	443	1.2e-43	R	4	RNA	Bacillus_cereus_ATCC_10987_chromosome<>Bacillus_thuringiensis_konkukian_chromosome<>Bacillus_cereus_ZK_chromosome<>Bacillus_thuringiensis_Al_Hakam_chromosome	-	0	Candidate_346_NC_005945(anti)	T1box4_NC_002745|3'(0)	-	-	-
Bacillus_anthracis_str_Sterne	|	Candidate_180_NC_005945	|	BAS0101		ybxB protein	*	>>>	1	|	108101	108364	>>>	263	|	27	>>>	BAS0102	DNA-directed RNA polymerase beta subunit	*	candidate	1225	2.9e-49	T	6	RNA	Bacillus_cereus_ATCC_10987_chromosome<>Bacillus_cereus_ATCC14579_chromosome<>Bacillus_thuringiensis_konkukian_chromosome<>Bacillus_cereus_ZK_chromosome<>Bacillus_thuringiensis_Al_Hakam_chromosome<>Bacillus_cereus_cytotoxis_NVH_391-98_chromosome	-	0	-	P26_yes_NC_002516|UD(5'(1-0)|3'(0-0))	5	-	-B.subtilis_sigG_2(9.24|-170)B.subtilis_sigA_1(9.03|-218)B.subtilis_sigA_1(9.58|-163)
Bacillus_anthracis_str_Sterne	|	Candidate_191_NC_005945	|	BAS0216		hypothetical protein	*	>>>	1	|	216316	216374	>>>	58	|	64	>>>	BAS0217	ABC transporter, ATP-binding protein	*	candidate	593	1.2e-20	T	3	RNA	Bacillus_cereus_ATCC14579_chromosome<>Bacillus_thuringiensis_konkukian_chromosome<>Bacillus_cereus_ZK_chromosome	-	0	-	rliI_NC_003210|3'(0)	5	-	-
Bacillus_anthracis_str_Sterne	|	Candidate_192_NC_005945	|	BAS0216		hypothetical protein	*	>>>	1	|	216316	216417	>>>	101	|	21	>>>	BAS0217	ABC transporter, ATP-binding protein	*	candidate	593	1.2e-20	B	3	RNA	Bacillus_cereus_ATCC14579_chromosome<>Bacillus_thuringiensis_konkukian_chromosome<>Bacillus_cereus_ZK_chromosome	-	0	-	rliI_NC_003210|3'(0)	5	-	-
Bacillus_anthracis_str_Sterne	|	Candidate_195_NC_005945	|	BAS0247		O-sialoglycoprotein endopeptidase	*	>>>	1	|	253969	254034	>>>	65	|	414	<<<	BAS0248	ABC transporter, ATP-binding protein	*	candidate	774	2.6e-29	T	5	RNA	Bacillus_cereus_ATCC14579_chromosome<>Bacillus_thuringiensis_konkukian_chromosome<>Bacillus_cereus_ZK_chromosome<>Bacillus_thuringiensis_Al_Hakam_chromosome<>Bacillus_cereus_cytotoxis_NVH_391-98_chromosome	-	0	Candidate_196_NC_005945(anti)	rliI_NC_003210|3'(0)	-	-	-
Bacillus_anthracis_str_Sterne	|	Candidate_249_NC_005945	|	BAS0857		hypothetical protein	*	>>>	1	|	920987	921273	>>>	286	|	679	>>>	BAS0858	oligopeptide ABC transporter,	*	candidate	1528	2.8e-63	T	1	RNA	Bacillus_thuringiensis_konkukian_chromosome	-	0	-	S_box1_NC_003210|3'(0)	-	-	-
Bacillus_anthracis_str_Sterne	|	Candidate_463_NC_005945	|	BAS3188		oxidoreductase, short chain	*	<<<	490	|	3164150	3164246	<<<	96	|	0	<<<	BAS3189	neutral protease	*	candidate	2684	9.2e-116	B	3	RNA	Bacillus_cereus_ATCC14579_chromosome<>Bacillus_thuringiensis_konkukian_chromosome<>Bacillus_cereus_ZK_chromosome	-	0	-	tmRNA_NC_000964|3'(0)	-	-	-B.subtilis_sigG_2(9.18|-92)
Bacillus_anthracis_str_Sterne	|	Candidate_478_NC_005945	|	BAS3262		amino acid permease family protein	*	<<<	309	|	3229913	3230056	<<<	143	|	149	<<<	BAS3263	drug resistance transporter, Bcr/CflA family	*	candidate	1553	1.2e-64	B	5	RNA	Bacillus_cereus_ATCC_10987_chromosome<>Bacillus_cereus_ATCC14579_chromosome<>Bacillus_thuringiensis_konkukian_chromosome<>Bacillus_cereus_ZK_chromosome<>Bacillus_thuringiensis_Al_Hakam_chromosome	-	0	-	Lysine_NC_003210|3'(0),Lysine2_NC_002745|3'(0)	-	-	-
Bacillus_anthracis_str_Sterne	|	Candidate_514_NC_005945	|	BAS3668		hypothetical protein	*	<<<	221	|	3629974	3630084	<<<	110	|	0	<<<	BAS3669	DNA polymerase III subunit alpha	*	candidate	1290	1.5e-52	B	6	RNA	Bacillus_cereus_ATCC_10987_chromosome<>Bacillus_cereus_ATCC14579_chromosome<>Bacillus_thuringiensis_konkukian_chromosome<>Bacillus_cereus_ZK_chromosome<>Bacillus_thuringiensis_Al_Hakam_chromosome<>Bacillus_cereus_cytotoxis_NVH_391-98_chromosome	-	1	Candidate_48_NC_005945(anti),Candidate_444_NC_005945(para)	polC-ylxS_NC_000964|UD(5'(1-1)|3'(0-0))	-	-	-
Bacillus_anthracis_str_Sterne	|	Candidate_532_NC_005945	|	BAS3911		hypothetical protein	*	>>>	1	|	3859424	3859532	>>>	108	|	507	>>>	BAS3912	5-methyltetrahydropteroyltriglutamate--	*	candidate	597	3.2e-113	T	2	RNA	Bacillus_cereus_ATCC_10987_chromosome<>Bacillus_cereus_ZK_chromosome	-	0	-	S_box6_NC_003210|3'(0),S_box3_NC_000964|3'(0)	-	-	-B.subtilis_sigG_2(9.32|-97)B.subtilis_sigA_1(9.71|-256)
Bacillus_anthracis_str_Sterne	|	Candidate_550_NC_005945	|	BAS4295		prespore-specific transcriptional regulator	*	>>>	-3	|	4206665	4206893	<<<	228	|	68	<<<	BAS4296	hesA/moeB/thiF family protein	*	candidate	525	3.1e-18	T	4	RNA	Bacillus_cereus_ATCC14579_chromosome<>Bacillus_thuringiensis_konkukian_chromosome<>Bacillus_cereus_ZK_chromosome<>Bacillus_thuringiensis_Al_Hakam_chromosome	-	26	Candidate_551_NC_005945(anti),Candidate_619_NC_005945(para),Candidate_790_NC_005945(para),Candidate_469_NC_005945(para),Candidate_313_NC_005945(para),Candidate_713_NC_005945(para),Candidate_779_NC_005945(para),Candidate_780_NC_005945(para),Candidate_241_NC_005945(para),Candidate_242_NC_005945(para),Candidate_775_NC_005945(para),Candidate_628_NC_005945(para),Candidate_585_NC_005945(para),Candidate…	6S_NC_002745|UD(5'(1-1)|3'(1-1))	-	-	-
Bacillus_anthracis_str_Sterne	|	Candidate_551_NC_005945	|	BAS4295		prespore-specific transcriptional regulator	*	>>>	48	|	4206716	4206960	>>>	244	|	1	<<<	BAS4296	hesA/moeB/thiF family protein	*	candidate	507	5.2e-17	T	3	RNA	Bacillus_thuringiensis_konkukian_chromosome<>Bacillus_cereus_ZK_chromosome<>Bacillus_thuringiensis_Al_Hakam_chromosome	-	26	Candidate_550_NC_005945(anti),Candidate_619_NC_005945(para),Candidate_790_NC_005945(para),Candidate_469_NC_005945(para),Candidate_313_NC_005945(para),Candidate_713_NC_005945(para),Candidate_779_NC_005945(para),Candidate_780_NC_005945(para),Candidate_241_NC_005945(para),Candidate_242_NC_005945(para),Candidate_775_NC_005945(para),Candidate_628_NC_005945(para),Candidate_585_NC_005945(para),Candidate…	6S_NC_002745|3'(0)	-	-	-B.subtilis_sigG_1(8.81|-211)B.subtilis_sigA_3(9.4|-173)
Bacillus_anthracis_str_Sterne	|	Candidate_600_NC_005945	|	BAS5027		FMN reductase, NADPH-dependent	*	>>>	2	|	4898578	4898839	>>>	261	|	1	>>>	BAS5028	macrolide efflux pump, putative	*	candidate	1311	2.1e-53	B	3	RNA	Bacillus_cereus_ATCC14579_chromosome<>Bacillus_thuringiensis_konkukian_chromosome<>Bacillus_cereus_ZK_chromosome	-	0	-	rliI_NC_003210|3'(0)	5	-	-B.subtilis_sigG_1(9.3|-218)B.subtilis_sigG_1(8.37|-131)B.subtilis_sigA_3(11.58|-231)
Bacillus_anthracis_str_Sterne	|	Candidate_693_NC_005945	|	BAS2422		hypothetical protein	*	<<<	233	|	2420866	2421146	>>>	280	|	29	>>>	BAS2423	ABC transporter ATP-binding protein	*	candidate	487	2.9e-16	F	1	RNA	Bacillus_subtilis_chromosome	-	1	Candidate_394_NC_005945(para)	rliI_NC_003210|3'(0)	5	RS	-B.subtilis_sigK_2(10.61|-228)B.subtilis_sigA_3(10.17|-213)
Bacillus_anthracis_str_Sterne	|	Candidate_734_NC_005945	|	BAS3668		hypothetical protein	*	<<<	87	|	3629840	3630084	<<<	244	|	0	<<<	BAS3669	DNA polymerase III subunit alpha	*	candidate	1290	1.5e-52	X	6	RNA	Bacillus_cereus_ATCC_10987_chromosome<>Bacillus_cereus_ATCC14579_chromosome<>Bacillus_thuringiensis_konkukian_chromosome<>Bacillus_cereus_ZK_chromosome<>Bacillus_thuringiensis_Al_Hakam_chromosome<>Bacillus_cereus_cytotoxis_NVH_391-98_chromosome	-	1	Candidate_48_NC_005945(anti),Candidate_444_NC_005945(para)	polC-ylxS_NC_000964|UD(5'(1-1)|3'(0-0))	-	RS	-
Bacillus_anthracis_str_Sterne	|	Candidate_759_NC_005945	|	BAS4267		aldehyde-alcohol dehydrogenase	*	<<<	1	|	4179439	4179696	>>>	257	|	0	<<<	BAS4268	cystathionine beta-lyase	*	candidate	1199	2.5e-48	X	5	RNA	Bacillus_cereus_ATCC_10987_chromosome<>Bacillus_cereus_ATCC14579_chromosome<>Bacillus_thuringiensis_konkukian_chromosome<>Bacillus_cereus_ZK_chromosome<>Bacillus_thuringiensis_Al_Hakam_chromosome	-	0	-	S_box3_NC_003210|3'(0)	-	-	-
Bacillus_anthracis_str_Sterne	|	Candidate_771_NC_005945	|	BAS4471		translation initiation factor IF-3	*	<<<	1	|	4381913	4382221	>>>	308	|	-1	<<<	BAS4472	threonyl-tRNA synthetase	*	candidate	923	6.6e-36	X	6	COD	Bacillus_cereus_ATCC_10987_chromosome<>Bacillus_cereus_ATCC14579_chromosome<>Bacillus_thuringiensis_konkukian_chromosome<>Bacillus_cereus_ZK_chromosome<>Bacillus_thuringiensis_Al_Hakam_chromosome<>Bacillus_cereus_cytotoxis_NVH_391-98_chromosome	-	0	L20_leader_NC_005945(anti)	T1box12_NC_000964|3'(0),T1box6_NC_003210|3'(0),T1box8_NC_002745|3'(0),T1box15_NC_000964|3'(0),T1box16_NC_000964|3'(0),T1box17_NC_000964|3'(0)	-	-	-B.subtilis_sigG_3(8.55|-283)
Bacillus_anthracis_str_Sterne	|	Candidate_776_NC_005945	|	BAS4636		vrrB protein	*	<<<	10	|	4529327	4529562	>>>	235	|	10	<<<	BAS4637	leucyl-tRNA synthetase	*	candidate	1199	2.6e-48	X	2	RNA	Bacillus_thuringiensis_konkukian_chromosome<>Bacillus_thuringiensis_Al_Hakam_chromosome	-	0	-	T1box14_NC_000964|3'(0),T1box10_NC_003210|3'(0)	-	-	-
Bacillus_anthracis_str_Sterne	|	Candidate_781_NC_005945	|	BAS4659		molybdenum cofactor biosynthesis protein B,	*	<<<	396	|	4553167	4553407	>>>	240	|	6	<<<	BAS4660	S-adenosylmethionine synthetase	*	candidate	676	1.2e-24	X	1	COD	Bacillus_thuringiensis_konkukian_chromosome	-	0	-	S_box8_NC_000964|3'(0),S_box3_NC_002745|3'(0),S_box5_NC_003210|3'(0)	-	-	-
Bacillus_anthracis_str_Sterne	|	L20_leader_NC_005945	|	BAS4471		translation initiation factor IF-3	*	<<<	-16	|	4381896	4382171	<<<	275	|	49	<<<	BAS4472	threonyl-tRNA synthetase	*	L20_leader	923	6.6e-36	X	6	COD	Bacillus_cereus_ATCC_10987_chromosome<>Bacillus_cereus_ATCC14579_chromosome<>Bacillus_thuringiensis_konkukian_chromosome<>Bacillus_cereus_ZK_chromosome<>Bacillus_thuringiensis_Al_Hakam_chromosome<>Bacillus_cereus_cytotoxis_NVH_391-98_chromosome	-	0	Candidate_771_NC_005945(anti)	Lysine2_NC_002745|UD(5'(0-0)|3'(0-1)),lhrB_NC_003210|3'(0)	5	-	-B.subtilis_sigA_2(9.91|-142)B.subtilis_sigA_2(9.56|-205)
Bacillus_cereus_ATCC_10987	|	Candidate_71_NC_003909	|	BCE_3278		pseudogene	*	<<<	264	|	3067284	3067346	<<<	62	|	0	<<<	BCE_3279	hypothetical protein	*	candidate	1355	1.7e-55	R	1	-	Bacillus_thuringiensis_konkukian_chromosome	-	0	-	ykkC1yxkD2_NC_000964|3'(0)	3	-	-
Bacillus_cereus_ATCC_10987	|	Candidate_82_NC_003909	|	BCE_2241		isoleucyl-tRNA synthetase	*	>>>	5	|	2147373	2147606	<<<	233	|	53	>>>	BCE_2242	neutral metalloprotease, putative	*	candidate	362	4.3e-36	R	3	RNA	Bacillus_anthracis_str_Sterne_chromosome<>Bacillus_thuringiensis_konkukian_chromosome<>Bacillus_thuringiensis_Al_Hakam_chromosome	-	0	-	T1box4_NC_002745|3'(0),T1box5_NC_000964|3'(0)	-	-	-
Bacillus_cereus_ATCC_10987	|	Candidate_116_NC_003909	|	BCE_0283		hypothetical protein	*	>>>	1	|	288068	288286	>>>	218	|	9	<<<	BCE_0284	ABC transporter, ATP-binding protein	*	candidate	743	6e-28	T	5	RNA	Bacillus_anthracis_Ames_chromosome<>Bacillus_anthracis_str_Sterne_chromosome<>Bacillus_thuringiensis_konkukian_chromosome<>Bacillus_anthracis_Ames_0581_chromosome<>Bacillus_thuringiensis_Al_Hakam_chromosome	-	0	-	rliI_NC_003210|3'(0)	-	-	-
Bacillus_cereus_ATCC_10987	|	Candidate_272_NC_003909	|	BCE_3855		hypothetical protein	*	<<<	221	|	3602010	3602120	<<<	110	|	0	<<<	BCE_3856	DNA polymerase III, alpha subunit, Gram-positive	*	candidate	1372	3.5e-56	B	5	RNA	Bacillus_anthracis_Ames_chromosome<>Bacillus_anthracis_str_Sterne_chromosome<>Bacillus_thuringiensis_konkukian_chromosome<>Bacillus_anthracis_Ames_0581_chromosome<>Bacillus_thuringiensis_Al_Hakam_chromosome	-	0	Candidate_419_NC_003909(anti)	polC-ylxS_NC_000964|UD(5'(1-1)|3'(0-0))	-	-	-
Bacillus_cereus_ATCC_10987	|	Candidate_284_NC_003909	|	BCE_4052		hypothetical protein	*	>>>	31	|	3791205	3791283	>>>	78	|	557	>>>	BCE_4053	5-methyltetrahydropteroyltriglutamate--	*	candidate	2073	2.3e-88	T	5	-	Bacillus_anthracis_Ames_chromosome<>Bacillus_anthracis_str_Sterne_chromosome<>Bacillus_thuringiensis_konkukian_chromosome<>Bacillus_anthracis_Ames_0581_chromosome<>Bacillus_thuringiensis_Al_Hakam_chromosome	-	1	Candidate_256_NC_003909(para)	S_box3_NC_000964|3'(0),S_box6_NC_003210|3'(0)	-	-	-B.subtilis_sigG_2(9.32|-97)
Bacillus_cereus_ATCC_10987	|	Candidate_297_NC_003909	|	BCE_4483		prespore-specific transcriptional regulator	*	>>>	-2	|	4153203	4153654	<<<	451	|	2	<<<	BCE_4484	hesA/moeB/thiF family protein	*	candidate	1255	4.1e-51	T	1	COD	Bacillus_thuringiensis_Al_Hakam_chromosome	-	2	Candidate_298_NC_003909(anti),Candidate_448_NC_003909(para),Candidate_319_NC_003909(para)	6S_NC_002745|UD(5'(1-1)|3'(1-1))	-	-	-B.subtilis_sigG_1(8.15|-180)
Bacillus_cereus_ATCC_10987	|	Candidate_298_NC_003909	|	BCE_4483		prespore-specific transcriptional regulator	*	>>>	60	|	4153265	4153655	>>>	390	|	1	<<<	BCE_4484	hesA/moeB/thiF family protein	*	candidate	1255	4.1e-51	T	1	COD	Bacillus_thuringiensis_Al_Hakam_chromosome	-	4	Candidate_297_NC_003909(anti),Candidate_320_NC_003909(para),Candidate_448_NC_003909(para),Candidate_329_NC_003909(para),Candidate_319_NC_003909(para)	6S_NC_002745|3'(0)	-	-	-
Bacillus_cereus_ATCC_10987	|	Candidate_395_NC_003909	|	BCE_2619		hypothetical protein	*	<<<	217	|	2493311	2493594	>>>	283	|	30	>>>	BCE_2620	ABC transporter, ATP-binding protein, putative	*	candidate	481	5.4e-16	F	6	RNA	Bacillus_subtilis_chromosome<>Bacillus_anthracis_Ames_chromosome<>Bacillus_anthracis_str_Sterne_chromosome<>Bacillus_thuringiensis_konkukian_chromosome<>Bacillus_anthracis_Ames_0581_chromosome<>Bacillus_thuringiensis_Al_Hakam_chromosome	-	0	-	T1box11_NC_003210|UD(5'(1-0)|3'(1-1)),rliI_NC_003210|3'(0)	5	-	-B.subtilis_sigK_2(10.61|-228)B.subtilis_sigG_3(8.33|-365)B.subtilis_sigG_3(8.08|-349)B.subtilis_sigA_3(10.17|-213)
Bacillus_cereus_ATCC_10987	|	Candidate_400_NC_003909	|	BCE_0266		UDP-N-acetylmuramoylalanyl-D-glutamyl-2,	*	>>>	1	|	267932	268198	>>>	266	|	37	>>>	BCE_0267	ATP-dependent RNA helicase, DEAD/DEAH box	*	candidate	1480	4.3e-61	Y	5	COD	Bacillus_anthracis_Ames_chromosome<>Bacillus_anthracis_str_Sterne_chromosome<>Bacillus_thuringiensis_konkukian_chromosome<>Bacillus_anthracis_Ames_0581_chromosome<>Bacillus_thuringiensis_Al_Hakam_chromosome	-	0	Candidate_399_NC_003909(anti)	C0343_NC_000913|3'(0)	5	-	-B.subtilis_sigA_2(10.06|-110)
Bacillus_cereus_ATCC_10987	|	Candidate_418_NC_003909	|	BCE_3855		hypothetical protein	*	<<<	87	|	3601876	3602120	<<<	244	|	0	<<<	BCE_3856	DNA polymerase III, alpha subunit, Gram-positive	*	candidate	1372	3.5e-56	X	5	RNA	Bacillus_anthracis_Ames_chromosome<>Bacillus_anthracis_str_Sterne_chromosome<>Bacillus_thuringiensis_konkukian_chromosome<>Bacillus_anthracis_Ames_0581_chromosome<>Bacillus_thuringiensis_Al_Hakam_chromosome	-	0	Candidate_419_NC_003909(anti)	polC-ylxS_NC_000964|UD(5'(1-1)|3'(0-0))	-	-	-
Bacillus_cereus_ATCC_10987	|	Candidate_446_NC_003909	|	BCE_4706		translation initiation factor IF-3	*	<<<	1	|	4358196	4358504	>>>	308	|	-1	<<<	BCE_4707	threonyl-tRNA synthetase	*	candidate	1518	8.1e-63	X	5	RNA	Bacillus_anthracis_Ames_chromosome<>Bacillus_anthracis_str_Sterne_chromosome<>Bacillus_thuringiensis_konkukian_chromosome<>Bacillus_anthracis_Ames_0581_chromosome<>Bacillus_thuringiensis_Al_Hakam_chromosome	-	0	L20_leader_NC_003909(anti)	T1box12_NC_000964|3'(0),T1box6_NC_003210|3'(0),T1box8_NC_002745|3'(0),T1box15_NC_000964|3'(0),T1box16_NC_000964|3'(0),T1box17_NC_000964|3'(0)	-	-	-B.subtilis_sigG_3(8.55|-283)
Bacillus_cereus_ATCC_10987	|	L20_leader_NC_003909	|	BCE_4706		translation initiation factor IF-3	*	<<<	-16	|	4358179	4358503	<<<	324	|	0	<<<	BCE_4707	threonyl-tRNA synthetase	*	L20_leader	1518	8.1e-63	X	5	RNA	Bacillus_anthracis_Ames_chromosome<>Bacillus_anthracis_str_Sterne_chromosome<>Bacillus_thuringiensis_konkukian_chromosome<>Bacillus_anthracis_Ames_0581_chromosome<>Bacillus_thuringiensis_Al_Hakam_chromosome	-	0	Candidate_446_NC_003909(anti)	Lysine2_NC_002745|UD(5'(0-0)|3'(0-1)),lhrB_NC_003210|3'(0)	5	-	-B.subtilis_sigA_2(9.91|-142)B.subtilis_sigA_2(9.56|-205)
Bacillus_cereus_ATCC14579	|	Candidate_30_NC_004722	|	BC3905		Sporulation sigma-E factor processing peptidase	*	<<<	49	|	3885398	3885565	>>>	167	|	40	<<<	BC3906	cell division protein FtsZ	*	candidate	498	1.1e-16	R	5	-	Bacillus_anthracis_Ames_chromosome<>Bacillus_anthracis_str_Sterne_chromosome<>Bacillus_thuringiensis_konkukian_chromosome<>Bacillus_anthracis_Ames_0581_chromosome<>Bacillus_thuringiensis_Al_Hakam_chromosome	-	3	Candidate_468_NC_004722(para),Candidate_469_NC_004722(para),Candidate_32_NC_004722(para)	SRP_bact_NC_005072|3'(0)	-	-	-
Bacillus_cereus_ATCC14579	|	Candidate_119_NC_004722	|	BC0121		16S rRNA m(2)G 1207 methyltransferase	*	>>>	1	|	113619	113880	>>>	261	|	27	>>>	BC0122	DNA-directed RNA polymerase beta subunit	*	candidate	1366	6.5e-56	T	5	RNA	Bacillus_anthracis_Ames_chromosome<>Bacillus_anthracis_str_Sterne_chromosome<>Bacillus_thuringiensis_konkukian_chromosome<>Bacillus_anthracis_Ames_0581_chromosome<>Bacillus_thuringiensis_Al_Hakam_chromosome	-	0	-	P26_yes_NC_002516|UD(5'(1-0)|3'(0-0))	5	-	-B.subtilis_sigG_2(9.24|-168)B.subtilis_sigA_1(9.03|-216)B.subtilis_sigA_1(9.58|-161)
Bacillus_cereus_ATCC14579	|	Candidate_123_NC_004722	|	BC0238		hypothetical protein	*	>>>	1	|	213268	213370	>>>	102	|	21	>>>	BC0239	ABC transporter ATP-binding protein uup	*	candidate	565	4.3e-20	B	4	RNA	Bacillus_anthracis_Ames_chromosome<>Bacillus_anthracis_str_Sterne_chromosome<>Bacillus_thuringiensis_konkukian_chromosome<>Bacillus_anthracis_Ames_0581_chromosome	-	0	-	rliI_NC_003210|3'(0)	5	-	-
Bacillus_cereus_ATCC14579	|	Candidate_126_NC_004722	|	BC0289		O-sialoglycoprotein endopeptidase	*	>>>	1	|	252925	252990	>>>	65	|	413	<<<	BC0290	ABC transporter ATP-binding protein uup	*	candidate	1267	1e-58	T	5	RNA	Bacillus_anthracis_Ames_chromosome<>Bacillus_anthracis_str_Sterne_chromosome<>Bacillus_thuringiensis_konkukian_chromosome<>Bacillus_anthracis_Ames_0581_chromosome<>Bacillus_thuringiensis_Al_Hakam_chromosome	-	0	Candidate_125_NC_004722(anti)	rliI_NC_003210|3'(0)	-	-	-
Bacillus_cereus_ATCC14579	|	Candidate_159_NC_004722	|	BC0906		ornithine cyclodeaminase	*	>>>	177	|	895498	895654	>>>	156	|	214	>>>	BC0907	Oligopeptide-binding protein oppA	*	candidate	625	2.8e-22	T	5	RNA	Bacillus_anthracis_Ames_chromosome<>Bacillus_anthracis_str_Sterne_chromosome<>Bacillus_thuringiensis_konkukian_chromosome<>Bacillus_anthracis_Ames_0581_chromosome<>Bacillus_thuringiensis_Al_Hakam_chromosome	-	0	-	S_box1_NC_003210|3'(0)	-	-	-
Bacillus_cereus_ATCC14579	|	Candidate_271_NC_004722	|	BC3382		Short chain dehydrogenase	*	<<<	590	|	3345229	3345325	<<<	96	|	0	<<<	BC3383	Bacillolysin	*	candidate	472	7.5e-16	B	3	RNA	Bacillus_anthracis_Ames_chromosome<>Bacillus_anthracis_str_Sterne_chromosome<>Bacillus_anthracis_Ames_0581_chromosome	-	12	Candidate_404_NC_004722(para),Candidate_393_NC_004722(para),Candidate_394_NC_004722(para),Candidate_37_NC_004722(para),Candidate_479_NC_004722(para),Candidate_279_NC_004722(para),Candidate_456_NC_004722(para),Candidate_224_NC_004722(para),Candidate_214_NC_004722(para),Candidate_152_NC_004722(para),Candidate_310_NC_004722(para),Candidate_72_NC_004722(para)	tmRNA_NC_000964|3'(0)	-	-	-
Bacillus_cereus_ATCC14579	|	Candidate_276_NC_004722	|	BC3406		Oxidoreductase	*	<<<	94	|	3370090	3370207	<<<	117	|	0	<<<	BC3407	Cyclopropane-fatty-acyl-phospholipid synthase	*	candidate	816	9.7e-32	T	4	RNA	Bacillus_anthracis_Ames_chromosome<>Bacillus_anthracis_str_Sterne_chromosome<>Bacillus_thuringiensis_konkukian_chromosome<>Bacillus_anthracis_Ames_0581_chromosome	-	0	-	sraI_ryhB_IS176_NC_000913|3'(0)	-	-	-
Bacillus_cereus_ATCC14579	|	Candidate_288_NC_004722	|	BC3815		hypothetical protein	*	<<<	225	|	3790111	3790221	<<<	110	|	0	<<<	BC3816	DNA polymerase III subunit alpha	*	candidate	1219	2.9e-49	B	5	RNA	Bacillus_anthracis_Ames_chromosome<>Bacillus_anthracis_str_Sterne_chromosome<>Bacillus_thuringiensis_konkukian_chromosome<>Bacillus_anthracis_Ames_0581_chromosome<>Bacillus_thuringiensis_Al_Hakam_chromosome	-	1	Candidate_28_NC_004722(opp),Candidate_437_NC_004722(anti)	polC-ylxS_NC_000964|UD(5'(0-0)|3'(1-1))	-	-	-
Bacillus_cereus_ATCC14579	|	Candidate_311_NC_004722	|	BC4395		Prespore specific transcriptional activator	*	>>>	-3	|	4334297	4334590	<<<	293	|	283	<<<	BC4396	Molybdopterin biosynthesis MoeB protein	*	candidate	517	1.4e-17	T	4	RNA	Bacillus_anthracis_Ames_chromosome<>Bacillus_anthracis_str_Sterne_chromosome<>Bacillus_thuringiensis_konkukian_chromosome<>Bacillus_anthracis_Ames_0581_chromosome	-	14	Candidate_177_NC_004722(para),Candidate_158_NC_004722(para),Candidate_331_NC_004722(para),Candidate_125_NC_004722(para),Candidate_468_NC_004722(para),Candidate_469_NC_004722(para),Candidate_179_NC_004722(para),Candidate_344_NC_004722(para),Candidate_345_NC_004722(para),Candidate_354_NC_004722(para),Candidate_92_NC_004722(para),Candidate_160_NC_004722(para),Candidate_53_NC_004722(para),Candidate_4…	6S_NC_002745|UD(5'(1-1)|3'(1-1))	-	-	-B.subtilis_sigG_1(8.15|-303)
Bacillus_cereus_ATCC14579	|	Candidate_341_NC_004722	|	BC5072		ABC transporter ATP-binding protein	*	<<<	25	|	4980069	4980480	<<<	411	|	0	<<<	BC5073	Spermidine N1-acetyltransferase	*	candidate	1987	3.8e-84	T	1	RNA	Bacillus_thuringiensis_Al_Hakam_chromosome	-	0	-	rliI_NC_003210|3'(0)	5	-	-B.subtilis_sigA_3(9.97|-361)
Bacillus_cereus_ATCC14579	|	Candidate_342_NC_004722	|	BC5072		ABC transporter ATP-binding protein	*	<<<	124	|	4980168	4980480	<<<	312	|	0	<<<	BC5073	Spermidine N1-acetyltransferase	*	candidate	1987	3.8e-84	T	1	RNA	Bacillus_thuringiensis_Al_Hakam_chromosome	-	0	-	rliI_NC_003210|3'(0)	-	-	-B.subtilis_sigA_3(9.97|-262)
Bacillus_cereus_ATCC14579	|	Candidate_406_NC_004722	|	BC0258		UDP-N-acetylmuramoylalanyl-D-glutamyl-2,	*	>>>	1	|	233420	233686	>>>	266	|	95	>>>	BC0259	ATP-dependent RNA helicase	*	candidate	1498	6.6e-62	Y	5	COD	Bacillus_anthracis_Ames_chromosome<>Bacillus_anthracis_str_Sterne_chromosome<>Bacillus_thuringiensis_konkukian_chromosome<>Bacillus_anthracis_Ames_0581_chromosome<>Bacillus_thuringiensis_Al_Hakam_chromosome	-	0	Candidate_405_NC_004722(anti)	C0343_NC_000913|3'(0)	-	-	-B.subtilis_sigA_2(10.06|-110)
Bacillus_cereus_ATCC14579	|	Candidate_436_NC_004722	|	BC3815		hypothetical protein	*	<<<	91	|	3789977	3790221	<<<	244	|	0	<<<	BC3816	DNA polymerase III subunit alpha	*	candidate	1219	2.9e-49	X	5	RNA	Bacillus_anthracis_Ames_chromosome<>Bacillus_anthracis_str_Sterne_chromosome<>Bacillus_thuringiensis_konkukian_chromosome<>Bacillus_anthracis_Ames_0581_chromosome<>Bacillus_thuringiensis_Al_Hakam_chromosome	-	0	Candidate_28_NC_004722(anti),Candidate_437_NC_004722(anti)	polC-ylxS_NC_000964|UD(5'(0-0)|3'(1-1))	-	-	-
Bacillus_cereus_ATCC14579	|	Candidate_464_NC_004722	|	BC4575		translation initiation factor IF-3	*	<<<	86	|	4520008	4520316	>>>	308	|	-1	<<<	BC4576	threonyl-tRNA synthetase	*	candidate	1455	5.7e-60	X	5	RNA	Bacillus_anthracis_Ames_chromosome<>Bacillus_anthracis_str_Sterne_chromosome<>Bacillus_thuringiensis_konkukian_chromosome<>Bacillus_anthracis_Ames_0581_chromosome<>Bacillus_thuringiensis_Al_Hakam_chromosome	-	0	L20_leader_NC_004722(anti)	T1box12_NC_000964|3'(0),T1box6_NC_003210|3'(0),T1box8_NC_002745|3'(0),T1box15_NC_000964|3'(0),T1box16_NC_000964|3'(0),T1box17_NC_000964|3'(0)	-	-	-B.subtilis_sigG_3(8.55|-283)
Bacillus_cereus_ATCC14579	|	L20_leader_NC_004722	|	BC4575		translation initiation factor IF-3	*	<<<	69	|	4519991	4520315	<<<	324	|	0	<<<	BC4576	threonyl-tRNA synthetase	*	L20_leader	1455	5.7e-60	Z	5	RNA	Bacillus_anthracis_Ames_chromosome<>Bacillus_anthracis_str_Sterne_chromosome<>Bacillus_thuringiensis_konkukian_chromosome<>Bacillus_anthracis_Ames_0581_chromosome<>Bacillus_thuringiensis_Al_Hakam_chromosome	-	0	Candidate_464_NC_004722(anti)	Lysine2_NC_002745|UD(5'(0-0)|3'(0-1)),lhrB_NC_003210|3'(0)	-	-	-B.subtilis_sigG_1(8.64|-262)B.subtilis_sigG_3(8.96|-262)B.subtilis_sigA_2(9.91|-142)B.subtilis_sigA_2(9.56|-205)
Bacillus_cereus_cytotoxis_NVH_391-98	|	Candidate_37_NC_009674	|	Bcer98_0012		seryl-tRNA synthetase	*	>>>	61	|	21828	21926	<<<	98	|	0	>>>	trRNA	trRNA	*	candidate	512	4.4e-17	T	5	RNA	Bacillus_anthracis_Ames_chromosome<>Bacillus_anthracis_str_Sterne_chromosome<>Bacillus_thuringiensis_konkukian_chromosome<>Bacillus_anthracis_Ames_0581_chromosome<>Bacillus_thuringiensis_Al_Hakam_chromosome	-	0	Candidate_38_NC_009674(anti)	T1box1_NC_000964|3'(0),T1box1_NC_002745|3'(0)	-	-	-B.subtilis_sigK_1(9.83|-78)B.subtilis_sigG_1(9.52|-81)
Bacillus_cereus_cytotoxis_NVH_391-98	|	Candidate_38_NC_009674	|	Bcer98_0012		seryl-tRNA synthetase	*	>>>	5	|	21772	21862	>>>	90	|	64	>>>	trRNA	trRNA	*	candidate	512	4.4e-17	T	5	RNA	Bacillus_anthracis_Ames_chromosome<>Bacillus_anthracis_str_Sterne_chromosome<>Bacillus_thuringiensis_konkukian_chromosome<>Bacillus_anthracis_Ames_0581_chromosome<>Bacillus_thuringiensis_Al_Hakam_chromosome	-	0	Candidate_37_NC_009674(anti)	T1box1_NC_000964|UD(5'(1-0)|3'(0-1))	5	-	-B.subtilis_sigA_3(9.64|-144)
Bacillus_cereus_cytotoxis_NVH_391-98	|	Candidate_50_NC_009674	|	Bcer98_0246		putative metalloendopeptidase, glycoprotease	*	>>>	1	|	264476	264541	>>>	65	|	314	<<<	Bcer98_0247	ABC transporter-related protein	*	candidate	748	3.6e-28	T	5	RNA	Bacillus_anthracis_Ames_chromosome<>Bacillus_anthracis_str_Sterne_chromosome<>Bacillus_thuringiensis_konkukian_chromosome<>Bacillus_anthracis_Ames_0581_chromosome<>Bacillus_thuringiensis_Al_Hakam_chromosome	-	0	Candidate_51_NC_009674(anti)	rliI_NC_003210|3'(0)	-	-	-
Bacillus_cereus_cytotoxis_NVH_391-98	|	Candidate_87_NC_009674	|	Bcer98_1301		Carboxypeptidase Taq	*	>>>	14	|	1409200	1409291	>>>	91	|	644	>>>	Bcer98_1302	xanthine phosphoribosyltransferase	*	candidate	496	6e-17	T	2	-	Bacillus_anthracis_str_Sterne_chromosome<>Bacillus_thuringiensis_konkukian_chromosome	-	2	Candidate_88_NC_009674(tandem),Candidate_93_NC_009674(para)	Purine2_NC_003210|UD(5'(0-0)|3'(0-0)),Purine4_NC_000964|UD(5'(0-0)|3'(0-0)),Purine_NC_002745|3'(0)	-	-	-B.subtilis_sigG_2(8.38|-55)B.subtilis_sigG_3(8.28|-133)
Bacillus_cereus_cytotoxis_NVH_391-98	|	Candidate_113_NC_009674	|	Bcer98_2469		protein of unknown function DUF150	*	<<<	224	|	2564013	2564123	<<<	110	|	0	<<<	Bcer98_2470	DNA polymerase III, alpha subunit	*	candidate	1104	4.5e-44	B	5	RNA	Bacillus_anthracis_Ames_chromosome<>Bacillus_anthracis_str_Sterne_chromosome<>Bacillus_thuringiensis_konkukian_chromosome<>Bacillus_anthracis_Ames_0581_chromosome<>Bacillus_thuringiensis_Al_Hakam_chromosome	-	0	Candidate_4_NC_009674(anti)	polC-ylxS_NC_000964|UD(5'(0-0)|3'(1-1))	-	-	-
Bacillus_cereus_cytotoxis_NVH_391-98	|	Candidate_201_NC_009674	|	Bcer98_2459		Polyribonucleotide nucleotidyltransferase	*	<<<	1	|	2556286	2556445	>>>	159	|	0	<<<	Bcer98_2460	ribosomal protein S15	*	candidate	700	1.4e-25	X	5	RNA	Bacillus_anthracis_Ames_chromosome<>Bacillus_anthracis_str_Sterne_chromosome<>Bacillus_thuringiensis_konkukian_chromosome<>Bacillus_anthracis_Ames_0581_chromosome<>Bacillus_thuringiensis_Al_Hakam_chromosome	-	0	-	rliD_NC_003210|UD(5'(0-0)|3'(0-0))	-	-	-
Bacillus_cereus_cytotoxis_NVH_391-98	|	Candidate_202_NC_009674	|	Bcer98_2469		protein of unknown function DUF150	*	<<<	36	|	2563825	2564123	<<<	298	|	0	<<<	Bcer98_2470	DNA polymerase III, alpha subunit	*	candidate	1104	4.5e-44	F	5	RNA	Bacillus_anthracis_Ames_chromosome<>Bacillus_anthracis_str_Sterne_chromosome<>Bacillus_thuringiensis_konkukian_chromosome<>Bacillus_anthracis_Ames_0581_chromosome<>Bacillus_thuringiensis_Al_Hakam_chromosome	-	0	Candidate_4_NC_009674(anti)	polC-ylxS_NC_000964|UD(5'(0-0)|3'(1-1))	-	-	-
Bacillus_cereus_cytotoxis_NVH_391-98	|	Candidate_203_NC_009674	|	Bcer98_2469		protein of unknown function DUF150	*	<<<	90	|	2563879	2564123	<<<	244	|	0	<<<	Bcer98_2470	DNA polymerase III, alpha subunit	*	candidate	1104	4.5e-44	X	5	RNA	Bacillus_anthracis_Ames_chromosome<>Bacillus_anthracis_str_Sterne_chromosome<>Bacillus_thuringiensis_konkukian_chromosome<>Bacillus_anthracis_Ames_0581_chromosome<>Bacillus_thuringiensis_Al_Hakam_chromosome	-	0	Candidate_4_NC_009674(anti)	polC-ylxS_NC_000964|UD(5'(0-0)|3'(1-1))	-	-	-
Bacillus_cereus_cytotoxis_NVH_391-98	|	Candidate_229_NC_009674	|	Bcer98_3261		translation initiation factor IF-3	*	<<<	-16	|	3326952	3327203	<<<	251	|	50	<<<	Bcer98_3262	threonyl-tRNA synthetase	*	candidate	918	1e-35	X	5	RNA	Bacillus_anthracis_Ames_chromosome<>Bacillus_anthracis_str_Sterne_chromosome<>Bacillus_thuringiensis_konkukian_chromosome<>Bacillus_anthracis_Ames_0581_chromosome<>Bacillus_thuringiensis_Al_Hakam_chromosome	-	0	Candidate_9_NC_009674(anti)	Lysine2_NC_002745|UD(5'(0-0)|3'(0-1)),lhrB_NC_003210|3'(0)	5	-	-B.subtilis_sigG_1(9.51|-243)B.subtilis_sigA_2(9.91|-142)B.subtilis_sigA_2(9.37|-200)
Bacillus_cereus_ZK	|	Candidate_52_NC_006274	|	BCZK3759		conserved hypothetical protein; possible	*	>>>	1	|	3895134	3895223	>>>	89	|	829	>>>	BCZK3760	5-methyltetrahydropteroyltriglutamate--	*	candidate	4136	1.5e-181	R	5	RNA	Bacillus_anthracis_Ames_chromosome<>Bacillus_anthracis_str_Sterne_chromosome<>Bacillus_thuringiensis_konkukian_chromosome<>Bacillus_anthracis_Ames_0581_chromosome<>Bacillus_thuringiensis_Al_Hakam_chromosome	-	0	-	S_box3_NC_000964|3'(0),S_box6_NC_003210|3'(0)	-	-	-B.subtilis_sigG_2(9.32|-78)B.subtilis_sigA_1(9.71|-237)
Bacillus_cereus_ZK	|	Candidate_118_NC_006274	|	BCZK1977		isoleucyl-tRNA synthetase	*	>>>	5	|	2095941	2096173	<<<	232	|	53	>>>	BCZK1978	bacillolysin (Bacillus metalloendopeptidase)	*	candidate	362	2.5e-35	R	3	RNA	Bacillus_anthracis_str_Sterne_chromosome<>Bacillus_thuringiensis_konkukian_chromosome<>Bacillus_thuringiensis_Al_Hakam_chromosome	-	0	-	T1box4_NC_002745|3'(0)	-	-	-
Bacillus_cereus_ZK	|	Candidate_177_NC_006274	|	BCZK0207		group-specific protein	*	>>>	4	|	219229	219287	>>>	58	|	64	>>>	BCZK0208	ABC transporter, ATP-binding protein	*	candidate	611	1.9e-21	T	4	RNA	Bacillus_anthracis_Ames_chromosome<>Bacillus_anthracis_str_Sterne_chromosome<>Bacillus_thuringiensis_konkukian_chromosome<>Bacillus_anthracis_Ames_0581_chromosome	-	0	-	rliI_NC_003210|3'(0)	5	-	-
Bacillus_cereus_ZK	|	Candidate_178_NC_006274	|	BCZK0207		group-specific protein	*	>>>	4	|	219229	219330	>>>	101	|	21	>>>	BCZK0208	ABC transporter, ATP-binding protein	*	candidate	611	1.9e-21	B	4	RNA	Bacillus_anthracis_Ames_chromosome<>Bacillus_anthracis_str_Sterne_chromosome<>Bacillus_thuringiensis_konkukian_chromosome<>Bacillus_anthracis_Ames_0581_chromosome	-	0	-	rliI_NC_003210|3'(0)	5	-	-
Bacillus_cereus_ZK	|	Candidate_180_NC_006274	|	BCZK0235		O-sialoglycoprotein endopeptidase	*	>>>	1	|	257181	257246	>>>	65	|	353	<<<	BCZK0236	ABC transporter, ATP-binding protein	*	candidate	2055	3.3e-87	T	5	RNA	Bacillus_anthracis_Ames_chromosome<>Bacillus_anthracis_str_Sterne_chromosome<>Bacillus_thuringiensis_konkukian_chromosome<>Bacillus_anthracis_Ames_0581_chromosome<>Bacillus_thuringiensis_Al_Hakam_chromosome	-	0	Candidate_181_NC_006274(anti)	rliI_NC_003210|3'(0)	-	-	-
Bacillus_cereus_ZK	|	Candidate_411_NC_006274	|	BCZK2954		hypothetical protein	*	<<<	344	|	3087726	3087828	<<<	102	|	0	<<<	BCZK2955	major facilitator family transporter	*	candidate	1892	7.1e-80	T	3	RNA	Bacillus_anthracis_Ames_chromosome<>Bacillus_anthracis_str_Sterne_chromosome<>Bacillus_anthracis_Ames_0581_chromosome	-	0	-	ykkC1yxkD2_NC_000964|3'(0)	-	-	-
Bacillus_cereus_ZK	|	Candidate_425_NC_006274	|	BCZK3090		possible oxidoreductase (short chain	*	<<<	491	|	3220737	3220833	<<<	96	|	0	<<<	BCZK3091	neutral protease (bacillolysin)	*	candidate	2684	9.2e-116	B	4	RNA	Bacillus_anthracis_Ames_chromosome<>Bacillus_anthracis_str_Sterne_chromosome<>Bacillus_thuringiensis_konkukian_chromosome<>Bacillus_anthracis_Ames_0581_chromosome	-	0	-	tmRNA_NC_000964|3'(0)	-	-	-B.subtilis_sigG_2(9.18|-92)
Bacillus_cereus_ZK	|	Candidate_429_NC_006274	|	BCZK3112		oxidoreductase	*	<<<	95	|	3245396	3245517	<<<	121	|	0	<<<	BCZK3113	cyclopropane-fatty-acyl-phospholipid synthase	*	candidate	1004	3.1e-40	T	4	RNA	Bacillus_anthracis_Ames_chromosome<>Bacillus_anthracis_str_Sterne_chromosome<>Bacillus_thuringiensis_konkukian_chromosome<>Bacillus_anthracis_Ames_0581_chromosome	-	0	-	sraI_ryhB_IS176_NC_000913|3'(0)	-	-	-
Bacillus_cereus_ZK	|	Candidate_466_NC_006274	|	BCZK3576		hypothetical protein	*	<<<	221	|	3709832	3709942	<<<	110	|	0	<<<	BCZK3577	DNA polymerase III subunit alpha	*	candidate	1390	5.4e-57	B	5	RNA	Bacillus_anthracis_Ames_chromosome<>Bacillus_anthracis_str_Sterne_chromosome<>Bacillus_thuringiensis_konkukian_chromosome<>Bacillus_anthracis_Ames_0581_chromosome<>Bacillus_thuringiensis_Al_Hakam_chromosome	-	1	Candidate_47_NC_006274(anti),Candidate_409_NC_006274(para)	polC-ylxS_NC_000964|UD(5'(1-1)|3'(0-0))	-	-	-
Bacillus_cereus_ZK	|	Candidate_480_NC_006274	|	BCZK3759		conserved hypothetical protein; possible	*	>>>	1	|	3895134	3895242	>>>	108	|	810	>>>	BCZK3760	5-methyltetrahydropteroyltriglutamate--	*	candidate	4136	1.5e-181	T	5	RNA	Bacillus_anthracis_Ames_chromosome<>Bacillus_anthracis_str_Sterne_chromosome<>Bacillus_thuringiensis_konkukian_chromosome<>Bacillus_anthracis_Ames_0581_chromosome<>Bacillus_thuringiensis_Al_Hakam_chromosome	-	0	-	S_box3_NC_000964|3'(0),S_box6_NC_003210|3'(0)	-	-	-B.subtilis_sigG_2(9.32|-97)B.subtilis_sigA_1(9.71|-256)
Bacillus_cereus_ZK	|	Candidate_502_NC_006274	|	BCZK4143		prespore-specific transcriptional regulator	*	>>>	-3	|	4249764	4249997	<<<	233	|	0	<<<	BCZK4144	hesA/moeB/thiF family protein	*	candidate	777	2.5e-29	T	3	RNA	Bacillus_anthracis_Ames_chromosome<>Bacillus_anthracis_str_Sterne_chromosome<>Bacillus_anthracis_Ames_0581_chromosome	-	11	Candidate_503_NC_006274(anti),Candidate_735_NC_006274(para),Candidate_229_NC_006274(para),Candidate_588_NC_006274(para),Candidate_575_NC_006274(para),Candidate_231_NC_006274(para),Candidate_295_NC_006274(para),Candidate_593_NC_006274(para),Candidate_386_NC_006274(para),Candidate_528_NC_006274(para),Candidate_259_NC_006274(para),Candidate_260_NC_006274(para)	6S_NC_002745|UD(5'(1-1)|3'(1-1))	-	-	-
Bacillus_cereus_ZK	|	Candidate_503_NC_006274	|	BCZK4143		prespore-specific transcriptional regulator	*	>>>	73	|	4249840	4249996	>>>	156	|	1	<<<	BCZK4144	hesA/moeB/thiF family protein	*	candidate	777	2.5e-29	T	3	RNA	Bacillus_anthracis_Ames_chromosome<>Bacillus_anthracis_str_Sterne_chromosome<>Bacillus_anthracis_Ames_0581_chromosome	-	11	Candidate_502_NC_006274(anti),Candidate_735_NC_006274(para),Candidate_229_NC_006274(para),Candidate_588_NC_006274(para),Candidate_575_NC_006274(para),Candidate_231_NC_006274(para),Candidate_295_NC_006274(para),Candidate_593_NC_006274(para),Candidate_386_NC_006274(para),Candidate_528_NC_006274(para),Candidate_259_NC_006274(para),Candidate_260_NC_006274(para)	6S_NC_002745|3'(0)	-	-	-B.subtilis_sigG_1(9.41|-224)B.subtilis_sigG_1(8.81|-150)
Bacillus_cereus_ZK	|	Candidate_515_NC_006274	|	BCZK4406		hypothetical protein	*	>>>	22	|	4513773	4513828	>>>	55	|	152	<<<	BCZK4407	tyrosyl-tRNA synthetase	*	candidate	213	5.7e-17	T	5	RNA	Bacillus_anthracis_Ames_chromosome<>Bacillus_anthracis_str_Sterne_chromosome<>Bacillus_thuringiensis_konkukian_chromosome<>Bacillus_anthracis_Ames_0581_chromosome<>Bacillus_thuringiensis_Al_Hakam_chromosome	-	13	T-box_NC_006274(para),Candidate_378_NC_006274(para),Candidate_627_NC_006274(para),Candidate_383_NC_006274(para),Candidate_31_NC_006274(para),Candidate_417_NC_006274(para),Candidate_334_NC_006274(para),Candidate_723_NC_006274(para),Candidate_37_NC_006274(para),Candidate_600_NC_006274(para),Candidate_441_NC_006274(para),Candidate_326_NC_006274(para),Candidate_327_NC_006274(para)	T1box7_NC_003210|3'(0),T1box13_NC_000964|3'(0),T1box9_NC_002745|3'(0)	-	-	-
Bacillus_cereus_ZK	|	Candidate_552_NC_006274	|	BCZK4872		possible NAD(P)H dehydrogenase (quinone);	*	>>>	2	|	4958211	4958472	>>>	261	|	1	>>>	BCZK4873	probable MDR-type ABC transporter, ATP-binding	*	candidate	1311	2.1e-53	B	4	RNA	Bacillus_anthracis_Ames_chromosome<>Bacillus_anthracis_str_Sterne_chromosome<>Bacillus_thuringiensis_konkukian_chromosome<>Bacillus_anthracis_Ames_0581_chromosome	-	0	-	rliI_NC_003210|3'(0)	5	-	-B.subtilis_sigG_1(9.3|-218)B.subtilis_sigG_1(8.37|-131)B.subtilis_sigA_3(11.58|-231)
Bacillus_cereus_ZK	|	Candidate_690_NC_006274	|	BCZK3576		hypothetical protein	*	<<<	87	|	3709698	3709942	<<<	244	|	0	<<<	BCZK3577	DNA polymerase III subunit alpha	*	candidate	1390	5.4e-57	X	5	RNA	Bacillus_anthracis_Ames_chromosome<>Bacillus_anthracis_str_Sterne_chromosome<>Bacillus_thuringiensis_konkukian_chromosome<>Bacillus_anthracis_Ames_0581_chromosome<>Bacillus_thuringiensis_Al_Hakam_chromosome	-	1	Candidate_47_NC_006274(anti),Candidate_409_NC_006274(para)	polC-ylxS_NC_000964|UD(5'(1-1)|3'(0-0))	-	RS	-
Bacillus_cereus_ZK	|	Candidate_714_NC_006274	|	BCZK4115		bifunctional protein: aldehyde dehydrogenase;	*	<<<	1	|	4222534	4222790	>>>	256	|	0	<<<	BCZK4116	cystathionine beta-lyase	*	candidate	1184	1.2e-47	X	5	RNA	Bacillus_anthracis_Ames_chromosome<>Bacillus_anthracis_str_Sterne_chromosome<>Bacillus_thuringiensis_konkukian_chromosome<>Bacillus_anthracis_Ames_0581_chromosome<>Bacillus_thuringiensis_Al_Hakam_chromosome	-	1	Candidate_605_NC_006274(para)	S_box3_NC_003210|3'(0)	-	-	-
Bacillus_cereus_ZK	|	Candidate_723_NC_006274	|	BCZK0378		probable tellurite resistance protein	*	>>>	1	|	441962	442149	>>>	187	|	-4	<<<	BCZK0379	cation-transporting ATPase A, P type (ATPase,	*	candidate	478	4.9e-16	Z	5	RNA	Bacillus_anthracis_Ames_chromosome<>Bacillus_anthracis_str_Sterne_chromosome<>Bacillus_thuringiensis_konkukian_chromosome<>Bacillus_anthracis_Ames_0581_chromosome<>Bacillus_thuringiensis_Al_Hakam_chromosome	-	11	Candidate_334_NC_006274(para),Candidate_515_NC_006274(para),Candidate_378_NC_006274(para),T-box_NC_006274(para),Candidate_31_NC_006274(para),Candidate_417_NC_006274(para),Candidate_627_NC_006274(para),Candidate_383_NC_006274(para),Candidate_553_NC_006274(para),Candidate_37_NC_006274(para),Candidate_600_NC_006274(para)	ykoK_NC_003210|3'(0)	-	-	-
Bacillus_cereus_ZK	|	Candidate_725_NC_006274	|	BCZK4317		translation initiation factor IF-3	*	<<<	1	|	4429479	4429787	>>>	308	|	-1	<<<	BCZK4318	threonyl-tRNA synthetase	*	candidate	1545	4.9e-64	X	5	COD	Bacillus_anthracis_Ames_chromosome<>Bacillus_anthracis_str_Sterne_chromosome<>Bacillus_thuringiensis_konkukian_chromosome<>Bacillus_anthracis_Ames_0581_chromosome<>Bacillus_thuringiensis_Al_Hakam_chromosome	-	0	L20_leader_NC_006274(anti)	T1box12_NC_000964|3'(0),T1box6_NC_003210|3'(0),T1box8_NC_002745|3'(0),T1box15_NC_000964|3'(0),T1box16_NC_000964|3'(0),T1box17_NC_000964|3'(0)	-	-	-B.subtilis_sigG_3(8.55|-283)
Bacillus_cereus_ZK	|	T-box_NC_006274	|	BCZK0369		hypothetical protein	*	>>>	1	|	432271	432590	>>>	319	|	-52	>>>	BCZK0370	prolyl-tRNA synthetase	*	T-box	1237	1.7e-50	F	5	RNA	Bacillus_anthracis_Ames_chromosome<>Bacillus_anthracis_str_Sterne_chromosome<>Bacillus_thuringiensis_konkukian_chromosome<>Bacillus_anthracis_Ames_0581_chromosome<>Bacillus_thuringiensis_Al_Hakam_chromosome	-	0	-	T1box3_NC_000964|UD(5'(1-1)|3'(0-0)),T1box12_NC_003210|UD(5'(1-1)|3'(0-0)),T1box7_NC_003210|UD(5'(0-1)|3'(0-0)),T1box5_NC_000964|UD(5'(0-0)|3'(0-0)),T1box4_NC_002745|UD(5'(0-0)|3'(0-0)),T1box8_NC_000964|UD(5'(1-1)|3'(0-0)),T1box10_NC_000964|UD(5'(0-0)|3'(1-1)),Lysine2_NC_002745|UD(5'(1-1)|3'(1-1)),T1box12_NC_000964|UD(5'(0-0)|3'(0-0)),T1box6_NC_003210|UD(5'(1-0)|3'(0-0)),T1box8_NC_002745|UD(5'(1-…	5	-	-B.subtilis_sigK_1(9.12|-107)B.subtilis_sigG_2(8.78|-297)B.subtilis_sigG_2(8.3|-287)
Bacillus_cereus_ZK	|	L20_leader_NC_006274	|	BCZK4317		translation initiation factor IF-3	*	<<<	-16	|	4429462	4429786	<<<	324	|	0	<<<	BCZK4318	threonyl-tRNA synthetase	*	L20_leader	1545	4.9e-64	X	5	COD	Bacillus_anthracis_Ames_chromosome<>Bacillus_anthracis_str_Sterne_chromosome<>Bacillus_thuringiensis_konkukian_chromosome<>Bacillus_anthracis_Ames_0581_chromosome<>Bacillus_thuringiensis_Al_Hakam_chromosome	-	0	Candidate_725_NC_006274(anti)	Lysine2_NC_002745|UD(5'(0-0)|3'(0-1)),lhrB_NC_003210|3'(0)	5	-	-B.subtilis_sigA_2(9.91|-142)B.subtilis_sigA_2(9.56|-205)
Bacillus_halodurans	|	Candidate_15_NC_002570	|	BH0268		D-fructose-6-phosphate amidotransferase	*	>>>	103	|	290914	291038	<<<	124	|	0	>>>	BH0269	transposase (09)	*	candidate	490	3.5e-16	X	1	RNA	Oceanobacillus_iheyensis_chromosome	-	6	Candidate_21_NC_002570(para),Candidate_26_NC_002570(para),Candidate_18_NC_002570(para),Candidate_13_NC_002570(para),Candidate_10_NC_002570(para),Candidate_24_NC_002570(para)	glmS_NC_003210|3'(0)	-	-	-
Bacillus_licheniformis_ATCC_14580	|	Candidate_18_NC_006270	|	BL02799		hypothetical protein with SAM binding motif	*	>>>	1	|	120695	120856	>>>	161	|	87	>>>	BL02798	DNA-directed RNA polymerase beta subunit	*	candidate	795	4.9e-30	T	2	-	Bacillus_subtilis_chromosome<>Bacillus_amyloliquefaciens_FZB42_chromosome	-	0	-	P26_yes_NC_002516|UD(5'(1-0)|3'(0-0))	-	-	-B.subtilis_sigG_2(8.97|-54)
Bacillus_licheniformis_ATCC_14580	|	Candidate_73_NC_006270	|	BL05240		hypothetical protein	*	<<<	67	|	2381118	2381192	<<<	74	|	0	<<<	BL05241	pseudogene	*	candidate	482	3.1e-24	X	1	RNA	Bacillus_cereus_cytotoxis_NVH_391-98_chromosome	-	0	-	RFN1_NC_000964|UD(5'(1-1)|3'(0-0)),RFN_NC_003210|3'(0)	3	-	-
Bacillus_licheniformis_DSM_13	|	Candidate_14_NC_006322	|	BLi00124		YbxB	*	>>>	1	|	120506	120667	>>>	161	|	87	>>>	BLi00125	DNA-directed RNA polymerase beta subunit	*	candidate	795	4.9e-30	T	2	-	Bacillus_subtilis_chromosome<>Bacillus_amyloliquefaciens_FZB42_chromosome	-	0	-	P26_yes_NC_002516|UD(5'(1-0)|3'(0-0))	-	-	-B.subtilis_sigG_2(8.97|-54)
Bacillus_licheniformis_DSM_13	|	Candidate_18_NC_006322	|	BLi00706		YjiB	*	>>>	4	|	711897	712182	>>>	285	|	405	>>>	BLi00708	YybP	*	candidate	241	4.8e-20	B	1	RNA	Bacillus_subtilis_chromosome	-	32	yybP-ykoY_NC_006322(tandem),Candidate_2_NC_006322(para),Candidate_21_NC_006322(para),Candidate_22_NC_006322(para),Candidate_46_NC_006322(para),Candidate_74_NC_006322(para),Candidate_6_NC_006322(para),Candidate_34_NC_006322(para),Candidate_62_NC_006322(para),Candidate_63_NC_006322(para),Candidate_26_NC_006322(para),Candidate_59_NC_006322(para),Candidate_60_NC_006322(para),Candidate_3_NC_006322(par…	yybP1ykoY2_NC_000964|3'(0)	-	-	-
Bacillus_subtilis	|	Candidate_31_NC_000964	|	BSU01060		hypothetical protein	*	>>>	5	|	121676	121832	>>>	156	|	83	>>>	BSU01070	DNA-directed RNA polymerase beta subunit	*	candidate	959	1.9e-37	T	3	RNA	Bacillus_licheniformis_ATCC_14580_chromosome<>Bacillus_licheniformis_DSM_13_chromosome<>Bacillus_amyloliquefaciens_FZB42_chromosome	-	0	-	P26_yes_NC_002516|UD(5'(1-0)|3'(0-0))	-	-	-B.subtilis_sigG_2(9.18|-53)B.subtilis_sigA_2(9.27|-136)
Bacillus_subtilis	|	Candidate_36_NC_000964	|	BSU05610		ATP-binding transport protein	*	<<<	28	|	605952	606193	<<<	241	|	49	<<<	BSU05620	hypothetical protein	*	candidate	954	2.7e-37	B	8	RNA	Bacillus_cereus_ATCC_10987_chromosome<>Bacillus_anthracis_Ames_chromosome<>Bacillus_cereus_ATCC14579_chromosome<>Bacillus_anthracis_str_Sterne_chromosome<>Bacillus_thuringiensis_konkukian_chromosome<>Bacillus_cereus_ZK_chromosome<>Bacillus_anthracis_Ames_0581_chromosome<>Bacillus_amyloliquefaciens_FZB42_chromosome	-	0	Candidate_129_NC_000964(anti)	rliI_NC_003210|3'(0)	5	-	-B.subtilis_sigG_2(8.64|-59)
Bacillus_subtilis	|	Candidate_37_NC_000964	|	BSU05940		O-sialoglycoprotein endopeptidase	*	>>>	2	|	643848	644071	>>>	223	|	3	<<<	BSU05950	hypothetical protein	*	candidate	565	1.3e-19	T	1	-	Bacillus_amyloliquefaciens_FZB42_chromosome	-	0	-	rliI_NC_003210|3'(0)	-	-	-B.subtilis_sigA_2(10.24|-279)
Bacillus_subtilis	|	Candidate_53_NC_000964	|	BSU22680		anthranilate synthase component I	*	<<<	65	|	2376681	2376803	<<<	122	|	27	<<<	BSU22690	chorismate mutase (isozymes 1 and 2)	*	candidate	516	1.9e-17	B	1	RNA	Bacillus_amyloliquefaciens_FZB42_chromosome	-	0	-	T1box8_NC_003210|3'(0),T1box9_NC_003210|3'(0),T1box5_NC_002745|3'(0),T1box6_NC_002745|3'(0)	-	-	-B.subtilis_sigA_3(10.02|-144)
Bacillus_subtilis	|	Candidate_81_NC_000964	|	BSU13440		hypothetical protein	*	>>>	-28	|	1410909	1411199	<<<	290	|	0	>>>	BSU13450	sigma factor SgiI	*	candidate	837	5.1e-32	X	1	-	Bacillus_amyloliquefaciens_FZB42_chromosome	-	0	-	yybP1ykoY_NC_003210|3'(0),yybP1ykoY_NC_002745|3'(0)	-	-	-
Bacillus_subtilis	|	Candidate_89_NC_000964	|	BSU16680		30S ribosomal protein S15	*	>>>	2	|	1738505	1738674	<<<	169	|	0	>>>	BSU16690	polynucleotide phosphorylase (PNPase)	*	candidate	711	4.1e-26	X	1	RNA	Bacillus_amyloliquefaciens_FZB42_chromosome	-	0	-	rliD_NC_003210|UD(5'(1-1)|3'(0-0))	-	-	-
Bacillus_subtilis	|	L20_leader_NC_000964	|	BSU28870		initiation factor IF-3	*	<<<	64	|	2952488	2952594	<<<	106	|	0	>>>	BSU28880	hypothetical protein	*	L20_leader	747	4.3e-28	X	1	RNA	Bacillus_amyloliquefaciens_FZB42_chromosome	-	0	-	lhrB_NC_003210|3'(0)	-	-	-B.subtilis_sigA_2(10.05|-144)
Bacillus_thuringiensis_Al_Hakam	|	Candidate_96_NC_008600	|	BALH_3112		amino acid permease	*	<<<	316	|	3297851	3297978	<<<	127	|	107	<<<	BALH_3115	drug resistance transporter, Bcr/CflA family	*	candidate	1746	2e-73	R	6	RNA	Bacillus_cereus_ATCC_10987_chromosome<>Bacillus_anthracis_Ames_chromosome<>Bacillus_cereus_ATCC14579_chromosome<>Bacillus_anthracis_str_Sterne_chromosome<>Bacillus_cereus_ZK_chromosome<>Bacillus_anthracis_Ames_0581_chromosome	-	0	-	Lysine_NC_003210|3'(0),Lysine2_NC_002745|3'(0)	-	-	-B.subtilis_sigG_1(10.18|-65)
Bacillus_thuringiensis_Al_Hakam	|	Candidate_176_NC_008600	|	BALH_0246		O-sialoglycoprotein endopeptidase	*	>>>	1	|	265951	266016	>>>	65	|	353	<<<	BALH_0247	ABC transporter, ATP-binding protein	*	candidate	748	4e-28	T	6	RNA	Bacillus_anthracis_Ames_chromosome<>Bacillus_cereus_ATCC14579_chromosome<>Bacillus_anthracis_str_Sterne_chromosome<>Bacillus_cereus_ZK_chromosome<>Bacillus_anthracis_Ames_0581_chromosome<>Bacillus_cereus_cytotoxis_NVH_391-98_chromosome	-	0	Candidate_177_NC_008600(anti)	rliI_NC_003210|3'(0)	-	-	-
Bacillus_thuringiensis_Al_Hakam	|	Candidate_255_NC_008600	|	BALH_1040		hypothetical protein	*	>>>	122	|	1190602	1190692	<<<	90	|	0	<<<	BALH_1041	tryptophan RNA ligase (tryptophanyl-tRNA	*	candidate	578	2.6e-20	T	5	RNA	Bacillus_cereus_ATCC_10987_chromosome<>Bacillus_cereus_ATCC14579_chromosome<>Bacillus_anthracis_str_Sterne_chromosome<>Bacillus_cereus_ZK_chromosome<>Bacillus_anthracis_Ames_0581_chromosome	-	12	Candidate_531_NC_008600(para),Candidate_532_NC_008600(para),Candidate_758_NC_008600(para),Candidate_582_NC_008600(para),Candidate_583_NC_008600(para),Candidate_787_NC_008600(para),Candidate_788_NC_008600(para),Candidate_574_NC_008600(para),Candidate_575_NC_008600(para),Candidate_785_NC_008600(para),Candidate_769_NC_008600(para),Candidate_766_NC_008600(para)	T1box3_NC_000964|UD(5'(1-0)|3'(0-1))	-	-	-
Bacillus_thuringiensis_Al_Hakam	|	Candidate_460_NC_008600	|	BALH_3445		hypothetical protein	*	<<<	167	|	3656105	3656215	<<<	110	|	0	<<<	BALH_3446	DNA polymerase III, alpha subunit	*	candidate	1104	3.8e-44	B	7	RNA	Bacillus_cereus_ATCC_10987_chromosome<>Bacillus_anthracis_Ames_chromosome<>Bacillus_cereus_ATCC14579_chromosome<>Bacillus_anthracis_str_Sterne_chromosome<>Bacillus_cereus_ZK_chromosome<>Bacillus_anthracis_Ames_0581_chromosome<>Bacillus_cereus_cytotoxis_NVH_391-98_chromosome	-	0	Candidate_39_NC_008600(anti)	polC-ylxS_NC_000964|UD(5'(1-1)|3'(0-0))	-	-	-
Bacillus_thuringiensis_Al_Hakam	|	Candidate_477_NC_008600	|	BALH_3621		possible transcriptional regulator	*	>>>	27	|	3845411	3845482	>>>	71	|	828	>>>	BALH_3622	5-methyltetrahydropteroyltriglutamate--	*	candidate	599	1.5e-21	T	5	RNA	Bacillus_cereus_ATCC_10987_chromosome<>Bacillus_cereus_ATCC14579_chromosome<>Bacillus_cereus_ZK_chromosome<>Bacillus_cereus_ZK_plasmid_pE33L466<>Bacillus_cereus_cytotoxis_NVH_391-98_chromosome	-	1	Candidate_258_NC_008600(para)	S_box3_NC_000964|3'(0),S_box6_NC_003210|3'(0)	-	-	-
Bacillus_thuringiensis_Al_Hakam	|	Candidate_501_NC_008600	|	BALH_3982		prespore-specific transcriptional regulator	*	>>>	-3	|	4194531	4194988	<<<	457	|	2	<<<	BALH_3983	hesA/moeB/thiF family protein	*	candidate	1390	2.7e-57	T	2	RNA	Bacillus_cereus_ATCC_10987_chromosome<>Bacillus_cereus_ATCC14579_chromosome	-	3	Candidate_502_NC_008600(anti),Candidate_225_NC_008600(para),Candidate_226_NC_008600(para),Candidate_603_NC_008600(para)	6S_NC_002745|UD(5'(1-1)|3'(1-1))	-	-	-B.subtilis_sigG_1(8.15|-187)
Bacillus_thuringiensis_Al_Hakam	|	Candidate_502_NC_008600	|	BALH_3982		prespore-specific transcriptional regulator	*	>>>	66	|	4194600	4194989	>>>	389	|	1	<<<	BALH_3983	hesA/moeB/thiF family protein	*	candidate	1255	4.2e-51	T	2	RNA	Bacillus_cereus_ATCC_10987_chromosome<>Bacillus_cereus_ATCC14579_chromosome	-	4	Candidate_501_NC_008600(anti),Candidate_225_NC_008600(para),Candidate_226_NC_008600(para),Candidate_584_NC_008600(para),Candidate_603_NC_008600(para)	6S_NC_002745|3'(0)	-	-	-
Bacillus_thuringiensis_Al_Hakam	|	Candidate_555_NC_008600	|	BALH_4611		ABC transporter, ATP-binding protein	*	<<<	25	|	4854644	4855055	<<<	411	|	0	<<<	BALH_4612	spermidine acetyltransferase	*	candidate	1987	3.8e-84	T	1	RNA	Bacillus_cereus_ATCC14579_chromosome	-	0	-	rliI_NC_003210|3'(0)	5	-	-B.subtilis_sigA_3(9.97|-361)
Bacillus_thuringiensis_Al_Hakam	|	Candidate_556_NC_008600	|	BALH_4611		ABC transporter, ATP-binding protein	*	<<<	124	|	4854743	4855055	<<<	312	|	0	<<<	BALH_4612	spermidine acetyltransferase	*	candidate	1987	3.8e-84	T	1	RNA	Bacillus_cereus_ATCC14579_chromosome	-	0	-	rliI_NC_003210|3'(0)	-	-	-B.subtilis_sigA_3(9.97|-262)
Bacillus_thuringiensis_Al_Hakam	|	Candidate_607_NC_008600	|	BALH_1040		hypothetical protein	*	>>>	-3	|	1190477	1190692	<<<	215	|	0	<<<	BALH_1041	tryptophan RNA ligase (tryptophanyl-tRNA	*	candidate	164	4.9e-21	Y	1	RNA	Bacillus_cereus_ZK_chromosome	-	12	Candidate_531_NC_008600(para),Candidate_532_NC_008600(para),Candidate_758_NC_008600(para),Candidate_582_NC_008600(para),Candidate_583_NC_008600(para),Candidate_787_NC_008600(para),Candidate_788_NC_008600(para),Candidate_574_NC_008600(para),Candidate_575_NC_008600(para),Candidate_785_NC_008600(para),Candidate_769_NC_008600(para),Candidate_766_NC_008600(para)	T1box3_NC_000964|UD(5'(1-0)|3'(0-1))	-	-	-
Bacillus_thuringiensis_Al_Hakam	|	Candidate_705_NC_008600	|	BALH_3445		hypothetical protein	*	<<<	33	|	3655971	3656215	<<<	244	|	0	<<<	BALH_3446	DNA polymerase III, alpha subunit	*	candidate	1104	3.8e-44	X	7	RNA	Bacillus_cereus_ATCC_10987_chromosome<>Bacillus_anthracis_Ames_chromosome<>Bacillus_cereus_ATCC14579_chromosome<>Bacillus_anthracis_str_Sterne_chromosome<>Bacillus_cereus_ZK_chromosome<>Bacillus_anthracis_Ames_0581_chromosome<>Bacillus_cereus_cytotoxis_NVH_391-98_chromosome	-	0	Candidate_39_NC_008600(anti)	polC-ylxS_NC_000964|UD(5'(1-1)|3'(0-0))	-	-	-
Bacillus_thuringiensis_Al_Hakam	|	Candidate_731_NC_008600	|	BALH_3956		aldehyde-alcohol dehydrogenase	*	<<<	1	|	4167301	4167557	>>>	256	|	0	<<<	BALH_3957	cystathionine beta-lyase	*	candidate	1199	2.5e-48	X	6	RNA	Bacillus_cereus_ATCC_10987_chromosome<>Bacillus_anthracis_Ames_chromosome<>Bacillus_cereus_ATCC14579_chromosome<>Bacillus_anthracis_str_Sterne_chromosome<>Bacillus_cereus_ZK_chromosome<>Bacillus_anthracis_Ames_0581_chromosome	-	0	-	S_box3_NC_003210|3'(0)	-	-	-
Bacillus_thuringiensis_Al_Hakam	|	Candidate_745_NC_008600	|	BALH_4159		translation initiation factor IF-3	*	<<<	-16	|	4378635	4378910	<<<	275	|	49	<<<	BALH_4160	threonine--tRNA ligase	*	candidate	923	6.6e-36	X	7	COD	Bacillus_cereus_ATCC_10987_chromosome<>Bacillus_anthracis_Ames_chromosome<>Bacillus_cereus_ATCC14579_chromosome<>Bacillus_anthracis_str_Sterne_chromosome<>Bacillus_cereus_ZK_chromosome<>Bacillus_anthracis_Ames_0581_chromosome<>Bacillus_cereus_cytotoxis_NVH_391-98_chromosome	-	0	Candidate_746_NC_008600(anti)	Lysine2_NC_002745|UD(5'(0-0)|3'(0-1)),lhrB_NC_003210|3'(0)	5	-	-B.subtilis_sigA_2(9.91|-142)B.subtilis_sigA_2(9.56|-205)
Bacillus_thuringiensis_Al_Hakam	|	Candidate_746_NC_008600	|	BALH_4159		translation initiation factor IF-3	*	<<<	1	|	4378652	4378960	>>>	308	|	-1	<<<	BALH_4160	threonine--tRNA ligase	*	candidate	923	6.6e-36	X	7	COD	Bacillus_cereus_ATCC_10987_chromosome<>Bacillus_anthracis_Ames_chromosome<>Bacillus_cereus_ATCC14579_chromosome<>Bacillus_anthracis_str_Sterne_chromosome<>Bacillus_cereus_ZK_chromosome<>Bacillus_anthracis_Ames_0581_chromosome<>Bacillus_cereus_cytotoxis_NVH_391-98_chromosome	-	0	Candidate_745_NC_008600(anti)	T1box12_NC_000964|3'(0),T1box6_NC_003210|3'(0),T1box8_NC_002745|3'(0),T1box15_NC_000964|3'(0),T1box16_NC_000964|3'(0),T1box17_NC_000964|3'(0)	-	-	-B.subtilis_sigG_3(8.55|-283)
Bacillus_thuringiensis_Al_Hakam	|	Candidate_749_NC_008600	|	BALH_4312		possible vrrB protein	*	<<<	1	|	4531235	4531470	>>>	235	|	10	<<<	BALH_4313	leucyl-tRNA synthetase	*	candidate	1199	2.5e-48	X	1	RNA	Bacillus_anthracis_str_Sterne_chromosome	-	0	-	T1box14_NC_000964|3'(0),T1box10_NC_003210|3'(0)	-	-	-
Bacillus_thuringiensis_Al_Hakam	|	Candidate_755_NC_008600	|	BALH_4339		molybdenum cofactor biosynthesis protein B	*	<<<	238	|	4557011	4557506	>>>	495	|	6	<<<	BALH_4340	S-adenosylmethionine synthetase	*	candidate	1534	3.6e-73	X	2	RNA	Bacillus_anthracis_str_Sterne_chromosome<>Bacillus_cereus_ZK_chromosome	-	0	-	S_box8_NC_000964|3'(0),S_box3_NC_002745|3'(0),S_box5_NC_003210|3'(0)	-	-	-
Bacillus_thuringiensis_konkukian	|	Candidate_113_NC_005957	|	BT9727_3014		hypothetical protein	*	<<<	262	|	3098265	3098328	<<<	63	|	12	<<<	BT9727_3015	hypothetical protein	*	candidate	1355	9.2e-56	R	1	-	Bacillus_cereus_ATCC_10987_chromosome	-	0	-	ykkC1yxkD2_NC_000964|3'(0)	3	-	-B.subtilis_sigG_2(8.33|-71)
Bacillus_thuringiensis_konkukian	|	Candidate_134_NC_005957	|	BT9727_1995		isoleucyl-tRNA synthetase	*	>>>	7	|	2079990	2080099	<<<	109	|	208	>>>	BT9727_1996	bacillolysin (Bacillus metalloendopeptidase)	*	candidate	332	2.9e-43	R	3	RNA	Bacillus_cereus_ATCC_10987_chromosome<>Bacillus_anthracis_str_Sterne_chromosome<>Bacillus_cereus_ZK_chromosome	-	0	Candidate_337_NC_005957(anti)	T1box4_NC_002745|3'(0)	-	-	-
Bacillus_thuringiensis_konkukian	|	Candidate_192_NC_005957	|	BT9727_0203		hypothetical protein	*	>>>	1	|	221862	221920	>>>	58	|	64	>>>	BT9727_0204	ABC transporter, ATP-binding protein	*	candidate	602	9.2e-22	T	5	RNA	Bacillus_anthracis_Ames_chromosome<>Bacillus_cereus_ATCC14579_chromosome<>Bacillus_anthracis_str_Sterne_chromosome<>Bacillus_cereus_ZK_chromosome<>Bacillus_anthracis_Ames_0581_chromosome	-	0	-	rliI_NC_003210|3'(0)	5	-	-
Bacillus_thuringiensis_konkukian	|	Candidate_193_NC_005957	|	BT9727_0203		hypothetical protein	*	>>>	1	|	221862	221963	>>>	101	|	21	>>>	BT9727_0204	ABC transporter, ATP-binding protein	*	candidate	602	9.2e-22	B	5	RNA	Bacillus_anthracis_Ames_chromosome<>Bacillus_cereus_ATCC14579_chromosome<>Bacillus_anthracis_str_Sterne_chromosome<>Bacillus_cereus_ZK_chromosome<>Bacillus_anthracis_Ames_0581_chromosome	-	0	-	rliI_NC_003210|3'(0)	5	-	-
Bacillus_thuringiensis_konkukian	|	Candidate_196_NC_005957	|	BT9727_0233		O-sialoglycoprotein endopeptidase	*	>>>	1	|	259952	260017	>>>	65	|	354	<<<	BT9727_0234	ABC transporter, ATP-binding protein	*	candidate	797	2.4e-30	T	6	RNA	Bacillus_anthracis_Ames_chromosome<>Bacillus_cereus_ATCC14579_chromosome<>Bacillus_anthracis_str_Sterne_chromosome<>Bacillus_cereus_ZK_chromosome<>Bacillus_anthracis_Ames_0581_chromosome<>Bacillus_cereus_cytotoxis_NVH_391-98_chromosome	-	0	Candidate_197_NC_005957(anti)	rliI_NC_003210|3'(0)	-	-	-
Bacillus_thuringiensis_konkukian	|	Candidate_464_NC_005957	|	BT9727_3169		possible oxidoreductase (short chain	*	<<<	490	|	3241135	3241231	<<<	96	|	0	<<<	BT9727_3170	neutral protease (bacillolysin)	*	candidate	2660	1.1e-114	B	4	RNA	Bacillus_anthracis_Ames_chromosome<>Bacillus_anthracis_str_Sterne_chromosome<>Bacillus_cereus_ZK_chromosome<>Bacillus_anthracis_Ames_0581_chromosome	-	0	-	tmRNA_NC_000964|3'(0)	-	-	-
Bacillus_thuringiensis_konkukian	|	Candidate_466_NC_005957	|	BT9727_3184		oxidoreductase, Gfo/Idh/MocA family	*	<<<	96	|	3257246	3257367	<<<	121	|	0	<<<	BT9727_3185	cyclopropane-fatty-acyl-phospholipid synthase	*	candidate	987	1.8e-39	T	5	RNA	Bacillus_anthracis_Ames_chromosome<>Bacillus_cereus_ATCC14579_chromosome<>Bacillus_anthracis_str_Sterne_chromosome<>Bacillus_cereus_ZK_chromosome<>Bacillus_anthracis_Ames_0581_chromosome	-	1	Candidate_547_NC_005957(para)	sraI_ryhB_IS176_NC_000913|3'(0)	-	RS	-
Bacillus_thuringiensis_konkukian	|	Candidate_474_NC_005957	|	BT9727_3234		amino acid permease	*	<<<	309	|	3301740	3301883	<<<	143	|	149	<<<	BT9727_3235	drug resistance transporter, Bcr/CflA family	*	candidate	1535	7.8e-64	B	6	RNA	Bacillus_cereus_ATCC_10987_chromosome<>Bacillus_anthracis_Ames_chromosome<>Bacillus_cereus_ATCC14579_chromosome<>Bacillus_anthracis_str_Sterne_chromosome<>Bacillus_cereus_ZK_chromosome<>Bacillus_anthracis_Ames_0581_chromosome	-	1	Candidate_709_NC_005957(para)	Lysine_NC_003210|3'(0),Lysine2_NC_002745|3'(0)	-	-	-B.subtilis_sigA_1(9.9|-161)
Bacillus_thuringiensis_konkukian	|	Candidate_505_NC_005957	|	BT9727_3558		hypothetical protein	*	<<<	221	|	3650950	3651060	<<<	110	|	0	<<<	BT9727_3559	DNA polymerase III subunit alpha	*	candidate	1290	1.5e-52	B	7	RNA	Bacillus_cereus_ATCC_10987_chromosome<>Bacillus_anthracis_Ames_chromosome<>Bacillus_cereus_ATCC14579_chromosome<>Bacillus_anthracis_str_Sterne_chromosome<>Bacillus_cereus_ZK_chromosome<>Bacillus_anthracis_Ames_0581_chromosome<>Bacillus_cereus_cytotoxis_NVH_391-98_chromosome	-	1	Candidate_50_NC_005957(anti),Candidate_440_NC_005957(para)	polC-ylxS_NC_000964|UD(5'(1-1)|3'(0-0))	-	-	-
Bacillus_thuringiensis_konkukian	|	Candidate_518_NC_005957	|	BT9727_3743		conserved hypothetical protein, possible	*	>>>	27	|	3838462	3838533	>>>	71	|	827	>>>	BT9727_3744	5-methyltetrahydropteroyltriglutamate--	*	candidate	599	1.5e-21	T	5	RNA	Bacillus_cereus_ATCC_10987_chromosome<>Bacillus_cereus_ATCC14579_chromosome<>Bacillus_cereus_ZK_chromosome<>Bacillus_cereus_ZK_plasmid_pE33L466<>Bacillus_cereus_cytotoxis_NVH_391-98_chromosome	-	1	Candidate_459_NC_005957(para)	S_box6_NC_003210|3'(0),S_box3_NC_000964|3'(0)	-	-	-
Bacillus_thuringiensis_konkukian	|	Candidate_679_NC_005957	|	BT9727_2380		hypothetical protein	*	<<<	230	|	2469775	2470057	>>>	282	|	30	>>>	BT9727_2381	ABC transporter, ATP-binding protein	*	candidate	498	9.3e-17	F	1	RNA	Bacillus_subtilis_chromosome	-	1	Candidate_385_NC_005957(para)	rliI_NC_003210|3'(0)	5	RS	-B.subtilis_sigK_2(10.61|-227)B.subtilis_sigA_3(10.17|-212)
Bacillus_thuringiensis_konkukian	|	Candidate_719_NC_005957	|	BT9727_3558		hypothetical protein	*	<<<	87	|	3650816	3651060	<<<	244	|	0	<<<	BT9727_3559	DNA polymerase III subunit alpha	*	candidate	1290	1.5e-52	X	7	RNA	Bacillus_cereus_ATCC_10987_chromosome<>Bacillus_anthracis_Ames_chromosome<>Bacillus_cereus_ATCC14579_chromosome<>Bacillus_anthracis_str_Sterne_chromosome<>Bacillus_cereus_ZK_chromosome<>Bacillus_anthracis_Ames_0581_chromosome<>Bacillus_cereus_cytotoxis_NVH_391-98_chromosome	-	1	Candidate_50_NC_005957(anti),Candidate_440_NC_005957(para)	polC-ylxS_NC_000964|UD(5'(1-1)|3'(0-0))	-	RS	-
Bacillus_thuringiensis_konkukian	|	Candidate_742_NC_005957	|	BT9727_4104		bifunctional protein: aldehyde dehydrogenase;	*	<<<	1	|	4168215	4168472	>>>	257	|	0	<<<	BT9727_4105	cystathionine beta-lyase	*	candidate	1178	2.2e-47	X	6	RNA	Bacillus_cereus_ATCC_10987_chromosome<>Bacillus_anthracis_Ames_chromosome<>Bacillus_cereus_ATCC14579_chromosome<>Bacillus_anthracis_str_Sterne_chromosome<>Bacillus_cereus_ZK_chromosome<>Bacillus_anthracis_Ames_0581_chromosome	-	0	-	S_box3_NC_003210|3'(0)	-	-	-
Bacillus_thuringiensis_konkukian	|	Candidate_753_NC_005957	|	BT9727_4306		translation initiation factor IF-3	*	<<<	1	|	4372074	4372383	>>>	309	|	-1	<<<	BT9727_4307	threonyl-tRNA synthetase	*	candidate	1517	8.3e-63	X	6	RNA	Bacillus_cereus_ATCC_10987_chromosome<>Bacillus_anthracis_Ames_chromosome<>Bacillus_cereus_ATCC14579_chromosome<>Bacillus_anthracis_str_Sterne_chromosome<>Bacillus_cereus_ZK_chromosome<>Bacillus_anthracis_Ames_0581_chromosome	-	0	L20_leader_NC_005957(anti)	T1box12_NC_000964|3'(0),T1box6_NC_003210|3'(0),T1box8_NC_002745|3'(0),T1box15_NC_000964|3'(0),T1box16_NC_000964|3'(0),T1box17_NC_000964|3'(0)	-	-	-B.subtilis_sigG_3(8.55|-284)
Bacillus_thuringiensis_konkukian	|	Candidate_757_NC_005957	|	BT9727_4471		hypervariable Bacillus group-specific protein	*	<<<	1	|	4525083	4525327	>>>	244	|	10	<<<	BT9727_4472	leucyl-tRNA synthetase	*	candidate	1271	1.4e-51	X	1	RNA	Bacillus_anthracis_str_Sterne_chromosome	-	0	-	T1box14_NC_000964|3'(0),T1box10_NC_003210|3'(0)	-	-	-
Bacillus_thuringiensis_konkukian	|	L20_leader_NC_005957	|	BT9727_4306		translation initiation factor IF-3	*	<<<	-16	|	4372057	4372313	<<<	256	|	69	<<<	BT9727_4307	threonyl-tRNA synthetase	*	L20_leader	918	1.1e-35	X	7	-	Bacillus_cereus_ATCC_10987_chromosome<>Bacillus_anthracis_Ames_chromosome<>Bacillus_cereus_ATCC14579_chromosome<>Bacillus_anthracis_str_Sterne_chromosome<>Bacillus_cereus_ZK_chromosome<>Bacillus_anthracis_Ames_0581_chromosome<>Bacillus_cereus_cytotoxis_NVH_391-98_chromosome	-	0	Candidate_753_NC_005957(anti)	Lysine2_NC_002745|UD(5'(0-0)|3'(0-1)),lhrB_NC_003210|3'(0)	5	-	-B.subtilis_sigA_2(9.91|-142)B.subtilis_sigA_2(9.56|-205)
Bacteroides_fragilis_NCTC_9434	|	Candidate_20_NC_003228	|	BF3267		putative 2-isopropylmalate synthase 1	*	<<<	32	|	3850333	3850639	<<<	306	|	62	<<<	BF3268	putative lipoprotein	*	candidate	775	1.5e-29	T	2	RNA	Bacteroides_thetaiotaomicron_VPI-5482_chromosome<>Bacteroides_vulgatus_ATCC_8482_chromosome	-	0	-	C1_NC_002505|3'(0)	-	-	-E.coli_sig70_1(7.62|-255)E.coli_sig70_2(8.32|-102)E.coli_sig70_2(7.36|-203)
Bacteroides_fragilis_YCH46	|	Candidate_25_NC_006347	|	BF3448		2-isopropylmalate synthase LeuA	*	<<<	32	|	3943511	3943817	<<<	306	|	62	<<<	BF3449	hypothetical protein	*	candidate	775	1.5e-29	T	2	RNA	Bacteroides_thetaiotaomicron_VPI-5482_chromosome<>Bacteroides_vulgatus_ATCC_8482_chromosome	-	0	-	C1_NC_002505|3'(0)	-	-	-E.coli_sig70_1(7.62|-255)E.coli_sig70_2(8.32|-102)E.coli_sig70_2(7.36|-203)
Bacteroides_thetaiotaomicron_VPI-5482	|	Candidate_16_NC_004663	|	BT_1861		2-isopropylmalate synthase	*	<<<	32	|	2336232	2336531	<<<	299	|	65	<<<	BT_1862	hypothetical protein	*	candidate	684	2e-25	T	3	RNA	Bacteroides_fragilis_NCTC_9434_chromosome<>Bacteroides_fragilis_YCH46_chromosome<>Bacteroides_vulgatus_ATCC_8482_chromosome	-	1	Candidate_39_NC_004663(anti),Candidate_25_NC_004663(para)	C1_NC_002505|3'(0)	-	RS	-E.coli_sig70_2(8.32|-101)
Bacteroides_vulgatus_ATCC_8482	|	Candidate_21_NC_009614	|	trRNA		trRNA	*	>>>	248	|	2593055	2593362	>>>	307	|	39	>>>	BVU_2004	2-isopropylmalate synthase	*	candidate	775	2.3e-29	T	3	RNA	Bacteroides_fragilis_NCTC_9434_chromosome<>Bacteroides_thetaiotaomicron_VPI-5482_chromosome<>Bacteroides_fragilis_YCH46_chromosome	-	0	-	C1_NC_002505|3'(0)	5	-	-
Bartonella_quintana_Toulouse	|	Candidate_8_NC_005955	|	BQ07010		30S ribosomal protein S2	*	<<<	30	|	830848	830976	<<<	128	|	0	<<<	BQ07020	hypothetical protein	*	candidate	604	2.7e-21	T	1	-	Bartonella_henselae_Houston-1_chromosome	-	0	-	tff_t44_ECK0167_NC_000913|3'(0)	-	-	-E.coli_sig70_1(7.47|-83)
Bordetella_bronchiseptica	|	Candidate_1_NC_002927	|	BB0279		ferredoxin	*	<<<	1	|	282038	282316	>>>	278	|	189	>>>	BB0280	hypothetical protein	*	candidate	2228	4.6e-95	R	2	RNA	Bordetella_parapertussis_chromosome<>Bordetella_pertussis_chromosome	-	0	-	Cobalamin1_NC_002516|UD(5'(1-0)|3'(1-0))	-	-	-
Bordetella_bronchiseptica	|	Candidate_16_NC_002927	|	BB0288		hypothetical protein	*	>>>	1	|	292753	292855	>>>	102	|	244	>>>	BB0289	hypothetical protein	*	candidate	1722	4.4e-72	T	2	RNA	Bordetella_parapertussis_chromosome<>Bordetella_pertussis_chromosome	-	0	Candidate_198_NC_002927(anti)	SokE_NC_000913|3'(0)	-	-	-
Bordetella_bronchiseptica	|	Candidate_17_NC_002927	|	BB0472		cold shock protein	*	>>>	1	|	504092	504182	>>>	90	|	84	>>>	BB0473	probable LysR-family transcriptional regulator	*	candidate	871	2.4e-33	T	1	RNA	Bordetella_parapertussis_chromosome	-	0	Candidate_315_NC_002927(anti)	C22_NC_003047|3'(0)	-	-	-
Bordetella_bronchiseptica	|	Candidate_19_NC_002927	|	BB0944		hypothetical protein	*	<<<	164	|	1022378	1022453	<<<	75	|	0	<<<	BB0945	binding-protein-dependent transport system	*	candidate	1161	1.4e-46	T	1	RNA	Bordetella_parapertussis_chromosome	-	39	Candidate_24_NC_002927(para),Candidate_53_NC_002927(para),Candidate_54_NC_002927(para),Candidate_23_NC_002927(para),Candidate_58_NC_002927(para),Candidate_59_NC_002927(para),Candidate_47_NC_002927(para),Candidate_224_NC_002927(para),Candidate_89_NC_002927(para),Candidate_111_NC_002927(para),Candidate_62_NC_002927(para),Candidate_63_NC_002927(para),Candidate_56_NC_002927(para),Candidate_57_NC_0029…	Cobalamin1_NC_002516|3'(0),P15_yes_NC_002516|3'(0),P16_yes_NC_002516|3'(0)	3	-	-
Bordetella_bronchiseptica	|	Candidate_20_NC_002927	|	BB1088		putative short chain dehydrogenase	*	>>>	140	|	1170776	1170945	>>>	169	|	93	>>>	BB1089	enoyl-CoA hydratase	*	candidate	509	9.6e-17	T	2	RNA	Bordetella_parapertussis_chromosome<>Bordetella_pertussis_chromosome	-	25	Candidate_49_NC_002927(para),Candidate_69_NC_002927(para),Candidate_310_NC_002927(para),Candidate_197_NC_002927(para),Candidate_307_NC_002927(para),Candidate_44_NC_002927(para),Candidate_33_NC_002927(para),Candidate_34_NC_002927(para),Candidate_25_NC_002927(para),Candidate_242_NC_002927(para),Candidate_23_NC_002927(para),Candidate_53_NC_002927(para),Candidate_54_NC_002927(para),Candidate_74_NC_00…	Cobalamin1_NC_002516|UD(5'(1-0)|3'(1-0))	-	RS	-
Bordetella_bronchiseptica	|	Candidate_21_NC_002927	|	BB1186		putative hemolysin	*	<<<	150	|	1279158	1279244	<<<	86	|	13	<<<	BB1187	putative LuxR-family transcriptional regulator	*	candidate	800	2.9e-30	T	1	RNA	Bordetella_parapertussis_chromosome	-	48	Candidate_47_NC_002927(para),Candidate_224_NC_002927(para),Candidate_307_NC_002927(para),Candidate_33_NC_002927(para),Candidate_34_NC_002927(para),Candidate_25_NC_002927(para),Candidate_24_NC_002927(para),Candidate_69_NC_002927(para),Candidate_310_NC_002927(para),Candidate_91_NC_002927(para),Candidate_26_NC_002927(para),Candidate_59_NC_002927(para),Candidate_89_NC_002927(para),Candidate_23_NC_002…	Cobalamin2_NC_002516|3'(0),P26_yes_NC_002516|3'(0),P11_yes_NC_002516|3'(0),P20_yes_NC_002516|3'(0),SRP_bact_NC_003047|3'(0)	-	-	-
Bordetella_bronchiseptica	|	Candidate_22_NC_002927	|	BB1335		putative membrane transport protein	*	>>>	1	|	1425641	1425750	>>>	109	|	2	<<<	BB1336	hypothetical protein	*	candidate	565	2.5e-19	T	1	RNA	Bordetella_parapertussis_chromosome	-	23	Candidate_33_NC_002927(para),Candidate_34_NC_002927(para),Candidate_307_NC_002927(para),Candidate_20_NC_002927(para),Candidate_49_NC_002927(para),Candidate_74_NC_002927(para),Candidate_111_NC_002927(para),Candidate_310_NC_002927(para),Candidate_89_NC_002927(para),Candidate_47_NC_002927(para),Candidate_224_NC_002927(para),Candidate_25_NC_002927(para),Candidate_21_NC_002927(para),Candidate_58_NC_00…	Cobalamin1_NC_002516|UD(5'(0-1)|3'(0-0))	-	-	-
Bordetella_bronchiseptica	|	Candidate_23_NC_002927	|	BB1437		putative nuclease/helicase	*	>>>	2	|	1533806	1533963	>>>	157	|	408	>>>	BB1438	DNA polymerase III subunits gamma and tau	*	candidate	1824	4.8e-77	T	2	RNA	Bordetella_parapertussis_chromosome<>Bordetella_pertussis_chromosome	-	34	Candidate_19_NC_002927(para),Candidate_24_NC_002927(para),Candidate_58_NC_002927(para),Candidate_111_NC_002927(para),Candidate_62_NC_002927(para),Candidate_63_NC_002927(para),Candidate_53_NC_002927(para),Candidate_54_NC_002927(para),Candidate_20_NC_002927(para),Candidate_21_NC_002927(para),Candidate_9_NC_002927(para),Candidate_300_NC_002927(para),Candidate_90_NC_002927(para),Candidate_89_NC_00292…	Cobalamin1_NC_002516|UD(5'(1-1)|3'(1-0)),SRP_bact_NC_002516|UD(5'(0-1)|3'(1-1)),Cobalamin2_NC_002516|UD(5'(0-1)|3'(1-1)),SRP_bact_NC_003047|3'(0),SRP_bact_NC_000964|3'(0),Cobalamin4_NC_002516|3'(0)	-	-	-
Bordetella_bronchiseptica	|	Candidate_25_NC_002927	|	trRNA		trRNA	*	>>>	1	|	1843278	1843453	>>>	175	|	50	<<<	BB1756	probable NADH-dependent flavin oxidoreductase	*	candidate	677	9.9e-25	T	2	RNA	Bordetella_parapertussis_chromosome<>Bordetella_pertussis_chromosome	-	42	Candidate_21_NC_002927(para),Candidate_24_NC_002927(para),Candidate_307_NC_002927(para),Candidate_47_NC_002927(para),Candidate_224_NC_002927(para),Candidate_91_NC_002927(para),Candidate_20_NC_002927(para),Candidate_310_NC_002927(para),Candidate_49_NC_002927(para),Candidate_33_NC_002927(para),Candidate_34_NC_002927(para),Candidate_58_NC_002927(para),Candidate_53_NC_002927(para),Candidate_54_NC_002…	P11_yes_NC_002516|3'(0)	-	-	-E.coli_sig70_2(7.49|-267)E.coli_sig70_3(10.66|-267)
Bordetella_bronchiseptica	|	Candidate_29_NC_002927	|	BB2002		hypothetical protein	*	<<<	128	|	2141282	2141354	<<<	72	|	8	<<<	BB2003	conserved integral membrane protein	*	candidate	1000	3.2e-39	B	2	RNA	Bordetella_parapertussis_chromosome<>Bordetella_pertussis_chromosome	-	0	Candidate_5_NC_002927(anti)	Cobalamin4_NC_002516|3'(0),Cobalamin1_NC_002516|3'(0)	-	-	-
Bordetella_bronchiseptica	|	Candidate_35_NC_002927	|	BB2403		putative gntR-family transcriptional regulator	*	<<<	107	|	2558978	2559118	<<<	140	|	0	<<<	BB2404	hypothetical protein	*	candidate	1153	3.1e-46	T	2	RNA	Bordetella_parapertussis_chromosome<>Bordetella_pertussis_chromosome	-	0	-	Cobalamin1_NC_002516|UD(5'(1-0)|3'(0-0))	-	-	-
Bordetella_bronchiseptica	|	Candidate_37_NC_002927	|	BB2663		hypothetical protein	*	>>>	1	|	2827315	2827382	>>>	67	|	109	<<<	BB2664	probable two-component response regulator	*	candidate	890	3.3e-34	B	1	RNA	Bordetella_parapertussis_chromosome	-	0	Candidate_38_NC_002927(anti)	P32_yes_NC_002516|3'(0)	-	-	-
Bordetella_bronchiseptica	|	Candidate_48_NC_002927	|	BB3393		hypothetical protein	*	>>>	1	|	3631619	3631720	>>>	101	|	21	<<<	BB3394	putative transferase	*	candidate	620	7.4e-22	T	2	RNA	Bordetella_parapertussis_chromosome<>Bordetella_pertussis_chromosome	-	31	Candidate_307_NC_002927(para),Candidate_21_NC_002927(para),Candidate_224_NC_002927(para),Candidate_24_NC_002927(para),Candidate_53_NC_002927(para),Candidate_54_NC_002927(para),Candidate_25_NC_002927(para),Candidate_91_NC_002927(para),Candidate_59_NC_002927(para),Candidate_58_NC_002927(para),Candidate_33_NC_002927(para),Candidate_34_NC_002927(para),Candidate_44_NC_002927(para),Candidate_19_NC_0029…	P20_yes_NC_002516|3'(0)	-	-	-
Bordetella_bronchiseptica	|	Candidate_53_NC_002927	|	BB3932		putative zinc protease	*	>>>	65	|	4181258	4181360	<<<	102	|	0	<<<	BB3933	molecular chaperone	*	candidate	822	4.1e-31	T	1	RNA	Bordetella_pertussis_chromosome	-	39	Candidate_54_NC_002927(anti),Candidate_24_NC_002927(para),Candidate_19_NC_002927(para),Candidate_58_NC_002927(para),Candidate_23_NC_002927(para),Candidate_62_NC_002927(para),Candidate_63_NC_002927(para),Candidate_310_NC_002927(para),Candidate_20_NC_002927(para),Candidate_89_NC_002927(para),Candidate_111_NC_002927(para),Candidate_44_NC_002927(para),Candidate_48_NC_002927(para),Candidate_25_NC_0029…	Cobalamin2_NC_002516|3'(0)	-	-	-
Bordetella_bronchiseptica	|	Candidate_61_NC_002927	|	BB4171		ABC transport protein, ATP-binding component	*	<<<	80	|	4432225	4432308	<<<	83	|	0	<<<	BB4172	hypothetical protein	*	candidate	811	1.3e-30	T	2	RNA	Bordetella_parapertussis_chromosome<>Bordetella_pertussis_chromosome	-	0	-	Cobalamin2_NC_002516|UD(5'(1-1)|3'(0-1)),S_box9_NC_000964|3'(0)	-	-	-
Bordetella_bronchiseptica	|	Candidate_71_NC_002927	|	BB4613		hypothetical protein	*	<<<	215	|	4914364	4914444	<<<	80	|	0	<<<	BB4614	enoyl-CoA hydratase	*	candidate	1444	4.2e-60	T	2	RNA	Bordetella_parapertussis_chromosome<>Bordetella_pertussis_chromosome	-	0	-	Cobalamin1_NC_002516|3'(0)	-	-	-
Bordetella_bronchiseptica	|	Candidate_78_NC_002927	|	BB0991		hypothetical protein	*	<<<	53	|	1071924	1072010	<<<	86	|	0	<<<	BB0992	probable pyridine nucleotide-disulphide	*	candidate	690	4.5e-25	Y	1	RNA	Bordetella_parapertussis_chromosome	-	0	Candidate_79_NC_002927(anti)	P20_yes_NC_002516|3'(0)	-	-	-
Bordetella_bronchiseptica	|	Candidate_82_NC_002927	|	BB1237		putative phosphoesterase	*	<<<	43	|	1329794	1329962	>>>	168	|	27	>>>	BB1238	cytochrome oxidase subunit I	*	candidate	826	1.6e-31	F	1	RNA	Bordetella_parapertussis_chromosome	-	32	Candidate_152_NC_002927(para),Candidate_153_NC_002927(para),Candidate_9_NC_002927(para),Candidate_300_NC_002927(para),Candidate_21_NC_002927(para),Candidate_91_NC_002927(para),Candidate_307_NC_002927(para),Candidate_33_NC_002927(para),Candidate_34_NC_002927(para),Candidate_47_NC_002927(para),Candidate_224_NC_002927(para),Candidate_89_NC_002927(para),Candidate_24_NC_002927(para),Candidate_23_NC_00…	Cobalamin4_NC_002516|UD(5'(0-1)|3'(1-0)),P20_yes_NC_002516|3'(0)	5	RS	-
Bordetella_bronchiseptica	|	Candidate_85_NC_002927	|	BB1274		putative LysR-family transcriptional regulator	*	<<<	1	|	1366296	1366407	>>>	111	|	12	>>>	BB1275	putative racemase	*	candidate	625	4.4e-22	F	1	-	Bordetella_parapertussis_chromosome	-	0	-	yybP1ykoY_NC_002516|UD(5'(1-1)|3'(0-1)),Cobalamin1_NC_002516|3'(0)	5	-	-
Bordetella_bronchiseptica	|	Candidate_90_NC_002927	|	BB1351		probable GntR-family transcriptional regulator	*	<<<	1	|	1444196	1444499	>>>	303	|	8	<<<	trRNA	trRNA	*	candidate	725	6.9e-27	X	1	RNA	Bordetella_parapertussis_chromosome	-	43	Candidate_89_NC_002927(para),Candidate_36_NC_002927(para),Candidate_69_NC_002927(para),Candidate_310_NC_002927(para),Candidate_19_NC_002927(para),Candidate_235_NC_002927(para),Candidate_197_NC_002927(para),Candidate_112_NC_002927(para),Candidate_21_NC_002927(para),Candidate_307_NC_002927(para),Candidate_202_NC_002927(para),Candidate_49_NC_002927(para),Candidate_23_NC_002927(para),Candidate_9_NC_0…	Cobalamin1_NC_002516|UD(5'(1-0)|3'(1-0))	-	-	-
Bordetella_bronchiseptica	|	Candidate_94_NC_002927	|	BB1365		uracil phosphoribosyltransferase	*	>>>	59	|	1460749	1460828	>>>	79	|	517	>>>	BB1366	pertactin precursor	*	candidate	520	9.2e-18	Y	3	RNA	Bordetella_parapertussis_chromosome<>Bordetella_pertussis_chromosome<>Polaromonas_JS666_chromosome	-	17	Candidate_93_NC_002927(anti),Candidate_95_NC_002927(opp),Candidate_96_NC_002927(opp),Candidate_180_NC_002927(para),Candidate_181_NC_002927(para),Candidate_182_NC_002927(para),Candidate_183_NC_002927(para),Candidate_184_NC_002927(para),Candidate_185_NC_002927(para),Candidate_186_NC_002927(para),Candidate_172_NC_002927(para),Candidate_173_NC_002927(para),Candidate_174_NC_002927(para),Candidate_155_…	Cobalamin1_NC_002516|UD(5'(1-0)|3'(0-0))	-	-	-
Bordetella_bronchiseptica	|	Candidate_97_NC_002927	|	BB1365		uracil phosphoribosyltransferase	*	>>>	59	|	1460749	1460995	>>>	246	|	350	>>>	BB1366	pertactin precursor	*	candidate	520	9.2e-18	Y	3	RNA	Bordetella_parapertussis_chromosome<>Bordetella_pertussis_chromosome<>Polaromonas_JS666_chromosome	-	22	Candidate_93_NC_002927(anti),Candidate_95_NC_002927(anti),Candidate_96_NC_002927(anti),Candidate_180_NC_002927(para),Candidate_181_NC_002927(para),Candidate_182_NC_002927(para),Candidate_183_NC_002927(para),Candidate_184_NC_002927(para),Candidate_185_NC_002927(para),Candidate_186_NC_002927(para),Candidate_172_NC_002927(para),Candidate_173_NC_002927(para),Candidate_174_NC_002927(para),Candidate_23…	Cobalamin1_NC_002516|UD(5'(1-0)|3'(0-0))	-	-	-
Bordetella_bronchiseptica	|	Candidate_107_NC_002927	|	BB1535		hypothetical protein	*	<<<	46	|	1640177	1640336	<<<	159	|	0	>>>	BB1536	Putative LysR-family transcriptional regulator	*	candidate	994	5.7e-39	F	1	-	Bordetella_parapertussis_chromosome	-	0	-	P20_yes_NC_002516|3'(0)	-	-	-
Bordetella_bronchiseptica	|	Candidate_113_NC_002927	|	trRNA		trRNA	*	>>>	1	|	1843278	1843367	>>>	89	|	136	<<<	BB1756	probable NADH-dependent flavin oxidoreductase	*	candidate	677	9.9e-25	Z	2	RNA	Bordetella_parapertussis_chromosome<>Bordetella_pertussis_chromosome	-	1	Candidate_235_NC_002927(para)	P11_yes_NC_002516|3'(0)	-	-	-E.coli_sig70_2(7.49|-181)E.coli_sig70_3(10.66|-181)
Bordetella_bronchiseptica	|	Candidate_114_NC_002927	|	BB1769		putative hemin storage protein	*	<<<	14	|	1857910	1858103	<<<	193	|	0	>>>	BB1770	hypothetical protein	*	candidate	1013	7.8e-40	F	2	-	Bordetella_parapertussis_chromosome<>Bordetella_pertussis_chromosome	-	0	-	Cobalamin2_NC_002516|3'(0)	5	-	-
Bordetella_bronchiseptica	|	Candidate_117_NC_002927	|	BB0181		hypothetical protein	*	<<<	144	|	189180	189311	<<<	131	|	0	<<<	BB0182	putative regulatory protein	*	candidate	1335	1.7e-54	F	2	-	Bordetella_parapertussis_chromosome<>Bordetella_pertussis_chromosome	-	0	-	Cobalamin3_NC_002516|3'(0)	-	-	-
Bordetella_bronchiseptica	|	Candidate_121_NC_002927	|	BB1845		putative lipoprotein	*	<<<	1	|	1951805	1951943	>>>	138	|	136	>>>	BB1846	putative ferric siderophore receptor	*	candidate	1317	1.1e-53	F	2	RNA	Bordetella_parapertussis_chromosome<>Bordetella_pertussis_chromosome	-	0	-	Cobalamin2_NC_002516|3'(0),Cobalamin1_NC_002516|3'(0)	-	-	-
Bordetella_bronchiseptica	|	Candidate_128_NC_002927	|	BB1904		RNA polymerase sigma-70 factor	*	<<<	1	|	2025213	2025341	>>>	128	|	78	>>>	BB1905	putative extracellular heme-binding protein	*	candidate	1031	1.2e-40	F	1	-	Bordetella_parapertussis_chromosome	-	0	-	Cobalamin1_NC_002516|UD(5'(1-0)|3'(0-0))	5	-	-
Bordetella_bronchiseptica	|	Candidate_132_NC_002927	|	BB1934		hypothetical protein	*	>>>	1	|	2058024	2058090	>>>	66	|	188	>>>	BB1935	3-deoxy-7-phosphoheptulonate synthase	*	candidate	1271	1.4e-51	Z	2	RNA	Bordetella_parapertussis_chromosome<>Bordetella_pertussis_chromosome	-	1	Candidate_133_NC_002927(opp)	Cobalamin1_NC_002516|UD(5'(0-0)|3'(1-0)),P15_yes_NC_002516|3'(0)	-	-	-
Bordetella_bronchiseptica	|	Candidate_134_NC_002927	|	BB1934		hypothetical protein	*	>>>	1	|	2058024	2058241	>>>	217	|	37	>>>	BB1935	3-deoxy-7-phosphoheptulonate synthase	*	candidate	1271	1.4e-51	Z	2	RNA	Bordetella_parapertussis_chromosome<>Bordetella_pertussis_chromosome	-	0	Candidate_133_NC_002927(anti)	Cobalamin1_NC_002516|UD(5'(0-0)|3'(1-0)),P15_yes_NC_002516|3'(0)	5	-	-
Bordetella_bronchiseptica	|	Candidate_146_NC_002927	|	BB2023		lipoprotein	*	>>>	1	|	2167897	2168035	>>>	138	|	16	>>>	BB2024	bifunctional proline	*	candidate	780	3.5e-29	F	2	RNA	Bordetella_parapertussis_chromosome<>Bordetella_pertussis_chromosome	-	0	-	P20_yes_NC_002516|3'(0),P34_yes_NC_002516|3'(0),P11_yes_NC_002516|3'(0)	5	-	-
Bordetella_bronchiseptica	|	Candidate_149_NC_002927	|	BB2048		hypothetical protein	*	<<<	1	|	2196220	2196323	>>>	103	|	19	>>>	BB2049	Putative beta-lactamase	*	candidate	620	7.4e-22	F	1	-	Bordetella_parapertussis_chromosome	-	0	-	P24_yes_NC_002516|3'(0)	5	-	-
Bordetella_bronchiseptica	|	Candidate_163_NC_002927	|	BB2149		probable two-component response regulator	*	<<<	37	|	2297968	2298293	>>>	325	|	24	>>>	BB2150	threonyl-tRNA synthetase	*	candidate	1746	3.6e-73	X	2	-	Bordetella_parapertussis_chromosome<>Bordetella_pertussis_chromosome	-	0	Candidate_162_NC_002927(anti)	T1box15_NC_000964|3'(0),T1box16_NC_000964|3'(0),T1box17_NC_000964|3'(0),T1box12_NC_000964|3'(0),T1box6_NC_003210|3'(0)	5	-	-
Bordetella_bronchiseptica	|	Candidate_164_NC_002927	|	BB2155		phosphoenolpyruvate-protein phosphotransferase	*	>>>	15	|	2304552	2304700	<<<	148	|	0	<<<	BB2156	hypothetical protein	*	candidate	802	3.4e-30	Z	2	RNA	Bordetella_parapertussis_chromosome<>Bordetella_pertussis_chromosome	-	0	-	P36_yes_NC_002516|3'(0)	-	-	-
Bordetella_bronchiseptica	|	Candidate_180_NC_002927	|	BB2301		serine protease	*	>>>	305	|	2434786	2435215	<<<	429	|	32	>>>	BB2302	hypothetical protein	*	candidate	480	5.9e-16	X	3	RNA	Bordetella_parapertussis_chromosome<>Bordetella_pertussis_chromosome<>Polaromonas_JS666_chromosome	-	20	Candidate_178_NC_002927(opp),Candidate_179_NC_002927(opp),Candidate_181_NC_002927(anti),Candidate_183_NC_002927(anti),Candidate_185_NC_002927(anti),Candidate_93_NC_002927(para),Candidate_94_NC_002927(para),Candidate_95_NC_002927(para),Candidate_96_NC_002927(para),Candidate_97_NC_002927(para),Candidate_172_NC_002927(para),Candidate_173_NC_002927(para),Candidate_174_NC_002927(para),Candidate_155_NC…	P34_yes_NC_002516|3'(0)	-	-	-
Bordetella_bronchiseptica	|	Candidate_182_NC_002927	|	BB2301		serine protease	*	>>>	388	|	2434869	2435215	<<<	346	|	32	>>>	BB2302	hypothetical protein	*	candidate	480	5.9e-16	X	3	RNA	Bordetella_parapertussis_chromosome<>Bordetella_pertussis_chromosome<>Polaromonas_JS666_chromosome	-	17	Candidate_178_NC_002927(opp),Candidate_179_NC_002927(opp),Candidate_181_NC_002927(opp),Candidate_183_NC_002927(anti),Candidate_185_NC_002927(anti),Candidate_93_NC_002927(para),Candidate_94_NC_002927(para),Candidate_95_NC_002927(para),Candidate_96_NC_002927(para),Candidate_97_NC_002927(para),Candidate_172_NC_002927(para),Candidate_173_NC_002927(para),Candidate_174_NC_002927(para),Candidate_155_NC_…	P34_yes_NC_002516|3'(0)	-	-	-
Bordetella_bronchiseptica	|	Candidate_184_NC_002927	|	BB2301		serine protease	*	>>>	471	|	2434952	2435215	<<<	263	|	32	>>>	BB2302	hypothetical protein	*	candidate	480	5.9e-16	X	3	RNA	Bordetella_parapertussis_chromosome<>Bordetella_pertussis_chromosome<>Polaromonas_JS666_chromosome	-	17	Candidate_178_NC_002927(opp),Candidate_179_NC_002927(opp),Candidate_181_NC_002927(opp),Candidate_183_NC_002927(opp),Candidate_185_NC_002927(anti),Candidate_93_NC_002927(para),Candidate_94_NC_002927(para),Candidate_95_NC_002927(para),Candidate_96_NC_002927(para),Candidate_97_NC_002927(para),Candidate_172_NC_002927(para),Candidate_173_NC_002927(para),Candidate_174_NC_002927(para),Candidate_155_NC_0…	P34_yes_NC_002516|3'(0)	-	-	-
Bordetella_bronchiseptica	|	Candidate_186_NC_002927	|	BB2301		serine protease	*	>>>	554	|	2435035	2435215	<<<	180	|	32	>>>	BB2302	hypothetical protein	*	candidate	480	5.9e-16	X	3	RNA	Bordetella_parapertussis_chromosome<>Bordetella_pertussis_chromosome<>Polaromonas_JS666_chromosome	-	11	Candidate_178_NC_002927(opp),Candidate_179_NC_002927(opp),Candidate_181_NC_002927(opp),Candidate_183_NC_002927(opp),Candidate_185_NC_002927(opp),Candidate_93_NC_002927(para),Candidate_94_NC_002927(para),Candidate_95_NC_002927(para),Candidate_96_NC_002927(para),Candidate_97_NC_002927(para),Candidate_284_NC_002927(para),Candidate_285_NC_002927(para),Candidate_235_NC_002927(para),Candidate_9_NC_0029…	P34_yes_NC_002516|3'(0)	-	-	-
Bordetella_bronchiseptica	|	Candidate_187_NC_002927	|	BB2301		serine protease	*	>>>	637	|	2435118	2435215	<<<	97	|	32	>>>	BB2302	hypothetical protein	*	candidate	480	5.9e-16	X	3	RNA	Bordetella_parapertussis_chromosome<>Bordetella_pertussis_chromosome<>Polaromonas_JS666_chromosome	-	3	Candidate_178_NC_002927(opp),Candidate_179_NC_002927(opp),Candidate_181_NC_002927(opp),Candidate_183_NC_002927(opp),Candidate_185_NC_002927(opp),Candidate_9_NC_002927(para),Candidate_300_NC_002927(para)	P34_yes_NC_002516|3'(0)	-	-	-
Bordetella_bronchiseptica	|	Candidate_189_NC_002927	|	BB2323		putative transcriptional regulator	*	>>>	1	|	2474246	2474425	>>>	179	|	68	>>>	BB2324	autotransporter	*	candidate	1119	1.9e-44	F	2	RNA	Bordetella_parapertussis_chromosome<>Bordetella_pertussis_chromosome	-	0	-	Cobalamin2_NC_002516|3'(0)	5	-	-
Bordetella_bronchiseptica	|	Candidate_195_NC_002927	|	BB2574		methyl-accepting chemotaxis protein	*	>>>	1	|	2739270	2739377	>>>	107	|	69	>>>	BB2575	methyl-accepting chemotaxis protein	*	candidate	836	5.1e-32	Y	2	RNA	Bordetella_parapertussis_chromosome<>Bordetella_pertussis_chromosome	-	0	-	sokB_NC_000913|3'(0),P11_yes_NC_002516|3'(0),Cobalamin4_NC_002516|3'(0),P20_yes_NC_002516|3'(0)	5	-	-
Bordetella_bronchiseptica	|	Candidate_197_NC_002927	|	BB2640		hypothetical protein	*	>>>	125	|	2802170	2802262	>>>	92	|	98	>>>	BB2641	probable transcriptional regulator	*	candidate	945	9.9e-37	Z	2	RNA	Bordetella_parapertussis_chromosome<>Bordetella_pertussis_chromosome	-	23	Candidate_69_NC_002927(para),Candidate_310_NC_002927(para),Candidate_20_NC_002927(para),Candidate_49_NC_002927(para),Candidate_74_NC_002927(para),Candidate_307_NC_002927(para),Candidate_112_NC_002927(para),Candidate_90_NC_002927(para),Candidate_242_NC_002927(para),Candidate_53_NC_002927(para),Candidate_54_NC_002927(para),Candidate_62_NC_002927(para),Candidate_63_NC_002927(para),Candidate_56_NC_00…	Cobalamin1_NC_002516|3'(0)	-	RS	-
Bordetella_bronchiseptica	|	Candidate_201_NC_002927	|	BB2933		hypothetical protein	*	>>>	1	|	3115537	3115646	>>>	109	|	26	>>>	BB2934	putative capsular polysaccharide biosynthesis	*	candidate	685	7.8e-25	Y	2	RNA	Bordetella_parapertussis_chromosome<>Bordetella_pertussis_chromosome	-	19	Candidate_284_NC_002927(para),Candidate_285_NC_002927(para),Candidate_155_NC_002927(para),Candidate_156_NC_002927(para),Candidate_99_NC_002927(para),Candidate_100_NC_002927(para),Candidate_180_NC_002927(para),Candidate_182_NC_002927(para),Candidate_184_NC_002927(para),Candidate_93_NC_002927(para),Candidate_95_NC_002927(para),Candidate_96_NC_002927(para),Candidate_97_NC_002927(para),Candidate_152_…	P18_yes_NC_002516|UD(5'(0-0)|3'(0-1)),P11_yes_NC_002516|UD(5'(0-1)|3'(0-0)),P1_yes_NC_002516|3'(0),P36_yes_NC_002516|3'(0)	5	RS	-
Bordetella_bronchiseptica	|	Candidate_203_NC_002927	|	BB2946		putative iron binding protein	*	>>>	1	|	3133040	3133153	>>>	113	|	8	>>>	BB2947	putative inner membrane component of	*	candidate	615	1.3e-21	Z	2	RNA	Bordetella_parapertussis_chromosome<>Bordetella_pertussis_chromosome	-	0	-	P20_yes_NC_002516|3'(0),Cobalamin1_NC_002516|3'(0),P15_yes_NC_002516|3'(0)	5	-	-
Bordetella_bronchiseptica	|	Candidate_210_NC_002927	|	BB3007		peptidyl-prolyl cis-trans isomerase D	*	<<<	-1	|	3213390	3213572	<<<	182	|	0	>>>	BB3008	cytoplasmic glycerophosphodiester	*	candidate	901	7.7e-35	F	2	RNA	Bordetella_parapertussis_chromosome<>Bordetella_pertussis_chromosome	-	0	-	SRP_bact_NC_003047|3'(0),Cobalamin4_NC_002516|3'(0),P11_yes_NC_002516|3'(0)	5	-	-
Bordetella_bronchiseptica	|	Candidate_215_NC_002927	|	BB0323		cyclolysin-activating lysine-acyltransferase	*	<<<	28	|	331081	331180	>>>	99	|	219	>>>	BB0324	bifunctional hemolysin-adenylate cyclase	*	candidate	1600	1.6e-66	F	2	-	Bordetella_parapertussis_chromosome<>Bordetella_pertussis_chromosome	-	0	-	Cobalamin1_NC_002516|3'(0)	-	-	-
Bordetella_bronchiseptica	|	Candidate_220_NC_002927	|	BB3166		ATP phosphoribosyltransferase regulatory	*	<<<	51	|	3380013	3380144	<<<	131	|	0	<<<	BB3167	putative inner membrane-anchored protein	*	candidate	915	2.4e-35	Y	2	RNA	Bordetella_parapertussis_chromosome<>Bordetella_pertussis_chromosome	-	0	-	Cobalamin1_NC_002516|3'(0)	-	-	-
Bordetella_bronchiseptica	|	Candidate_231_NC_002927	|	BB3292		autotransporter	*	<<<	243	|	3524063	3524135	<<<	72	|	0	<<<	BB3293	ATP-dependent protease, ATPase subunit	*	candidate	1394	1.3e-57	Z	2	-	Bordetella_parapertussis_chromosome<>Bordetella_pertussis_chromosome	-	0	-	SRP_bact_NC_002516|UD(5'(0-1)|3'(0-1))	3	-	-
Bordetella_bronchiseptica	|	Candidate_234_NC_002927	|	BB3315		putative transport protein	*	<<<	10	|	3544144	3544242	<<<	98	|	0	>>>	BB3316	probable LysR-family transcriptional regulator	*	candidate	545	2.1e-18	X	1	-	Bordetella_parapertussis_chromosome	-	0	-	P20_yes_NC_002516|3'(0)	5	-	-
Bordetella_bronchiseptica	|	Candidate_242_NC_002927	|	BB3385		hypothetical protein	*	>>>	10	|	3616684	3617163	>>>	479	|	8	<<<	trRNA	trRNA	*	candidate	547	1.4e-18	Y	2	RNA	Bordetella_parapertussis_chromosome<>Bordetella_pertussis_chromosome	-	24	Candidate_20_NC_002927(para),Candidate_9_NC_002927(para),Candidate_300_NC_002927(para),Candidate_47_NC_002927(para),Candidate_224_NC_002927(para),Candidate_112_NC_002927(para),Candidate_89_NC_002927(para),Candidate_197_NC_002927(para),Candidate_307_NC_002927(para),Candidate_21_NC_002927(para),Candidate_44_NC_002927(para),Candidate_62_NC_002927(para),Candidate_63_NC_002927(para),Candidate_69_NC_00…	rne5_NC_000913|3'(0),Cobalamin2_NC_002516|3'(0)	-	-	-
Bordetella_bronchiseptica	|	Candidate_244_NC_002927	|	BB3407		putative transport protein	*	<<<	39	|	3652558	3652672	<<<	114	|	0	<<<	BB3408	ribose-5-phosphate isomerase A	*	candidate	635	1.5e-22	F	2	-	Bordetella_parapertussis_chromosome<>Bordetella_pertussis_chromosome	-	0	-	Cobalamin2_NC_002516|UD(5'(1-1)|3'(1-0))	-	-	-E.coli_sig70_2(7.79|-61)
Bordetella_bronchiseptica	|	Candidate_271_NC_002927	|	BB3785		endonuclease III	*	>>>	-17	|	4009042	4009316	<<<	274	|	0	>>>	BB3786	ABC transporter ATP-binding protein	*	candidate	1254	8.2e-51	F	2	-	Bordetella_parapertussis_chromosome<>Bordetella_pertussis_chromosome	-	0	-	yybP1ykoY_NC_002516|UD(5'(0-1)|3'(1-1))	-	-	-
Bordetella_bronchiseptica	|	Candidate_276_NC_002927	|	BB3882		30S ribosomal protein S15	*	<<<	55	|	4122955	4123192	<<<	237	|	0	>>>	BB3883	putative lipoprotein	*	candidate	1456	5.5e-60	F	2	RNA	Bordetella_parapertussis_chromosome<>Bordetella_pertussis_chromosome	-	0	-	S15_NC_000913|3'(0),sraG_p3_NC_000913|3'(0)	-	-	-
Bordetella_bronchiseptica	|	Candidate_284_NC_002927	|	BB3983		putative ATP-dependent RNA helicase	*	<<<	310	|	4234555	4234698	<<<	143	|	0	<<<	BB3984	putative conserved inner membrane protein	*	candidate	632	1.2e-22	Z	2	RNA	Bordetella_parapertussis_chromosome<>Bordetella_pertussis_chromosome	-	23	Candidate_283_NC_002927(opp),Candidate_285_NC_002927(anti),Candidate_180_NC_002927(para),Candidate_182_NC_002927(para),Candidate_184_NC_002927(para),Candidate_185_NC_002927(para),Candidate_186_NC_002927(para),Candidate_155_NC_002927(para),Candidate_156_NC_002927(para),Candidate_157_NC_002927(para),Candidate_172_NC_002927(para),Candidate_173_NC_002927(para),Candidate_93_NC_002927(para),Candidate_9…	C0343_NC_000913|3'(0)	-	-	-
Bordetella_bronchiseptica	|	Candidate_291_NC_002927	|	BB4168		putative alcohol dehydrogenase	*	<<<	222	|	4429325	4429388	<<<	63	|	7	<<<	trRNA	trRNA	*	candidate	719	9.5e-27	Y	2	RNA	Bordetella_parapertussis_chromosome<>Bordetella_pertussis_chromosome	-	0	Candidate_292_NC_002927(anti)	P20_yes_NC_002516|3'(0),Cobalamin1_NC_002516|3'(0)	3	-	-E.coli_sig70_2(9.9|-161)
Bordetella_bronchiseptica	|	Candidate_293_NC_002927	|	trRNA		trRNA	*	<<<	39	|	4429511	4429600	<<<	89	|	0	<<<	BB4169	hypothetical protein	*	candidate	591	1.5e-20	F	2	-	Bordetella_parapertussis_chromosome<>Bordetella_pertussis_chromosome	-	0	-	P20_yes_NC_002516|3'(0),Cobalamin1_NC_002516|3'(0)	-	-	-
Bordetella_bronchiseptica	|	Candidate_294_NC_002927	|	trRNA		trRNA	*	<<<	55	|	4429527	4429600	<<<	73	|	0	<<<	BB4169	hypothetical protein	*	candidate	591	1.5e-20	Y	2	-	Bordetella_parapertussis_chromosome<>Bordetella_pertussis_chromosome	-	0	-	P20_yes_NC_002516|3'(0),Cobalamin1_NC_002516|3'(0)	3	-	-
Bordetella_bronchiseptica	|	Candidate_295_NC_002927	|	BB4172		hypothetical protein	*	<<<	1	|	4434536	4434667	>>>	131	|	161	<<<	BB4173	hypothetical protein	*	candidate	1461	4.4e-61	F	2	-	Bordetella_parapertussis_chromosome<>Bordetella_pertussis_chromosome	-	0	-	yybP1ykoY_NC_002516|UD(5'(1-1)|3'(0-1)),P20_yes_NC_002516|3'(0),Cobalamin1_NC_002516|3'(0),P34_yes_NC_002516|3'(0)	-	-	-E.coli_sig70_1(7.91|-58)
Bordetella_bronchiseptica	|	Candidate_299_NC_002927	|	BB4241		putative ABC transport ATP-binding subunit	*	>>>	1	|	4515912	4516038	>>>	126	|	40	>>>	BB4242	hypothetical protein	*	candidate	831	1.4e-31	X	2	-	Bordetella_parapertussis_chromosome<>Bordetella_pertussis_chromosome	-	0	-	Cobalamin1_NC_002516|UD(5'(1-1)|3'(1-0))	5	-	-
Bordetella_bronchiseptica	|	Candidate_303_NC_002927	|	BB4450		putative permease protein	*	>>>	157	|	4741289	4741342	<<<	53	|	0	>>>	BB4451	hypothetical protein	*	candidate	1046	2.5e-41	F	2	RNA	Bordetella_parapertussis_chromosome<>Bordetella_pertussis_chromosome	-	0	-	Cobalamin4_NC_002516|UD(5'(1-1)|3'(0-0)),P16_yes_NC_002516|3'(0)	-	-	-
Bordetella_bronchiseptica	|	Candidate_304_NC_002927	|	BB0451		entericidin A anti-toxin precursor	*	>>>	1	|	474360	474483	>>>	123	|	90	>>>	BB0452	autotransporter	*	candidate	1048	6.8e-42	F	2	-	Bordetella_parapertussis_chromosome<>Bordetella_pertussis_chromosome	-	0	-	P20_yes_NC_002516|3'(0),P34_yes_NC_002516|3'(0),P15_yes_NC_002516|3'(0),P26_yes_NC_002516|3'(0),Cobalamin1_NC_002516|3'(0),P11_yes_NC_002516|3'(0)	-	-	-
Bordetella_bronchiseptica	|	Candidate_307_NC_002927	|	BB0453		hypothetical protein	*	>>>	120	|	482461	482571	>>>	110	|	157	>>>	BB0454	hypothetical protein	*	candidate	1263	3.1e-51	Z	2	RNA	Bordetella_parapertussis_chromosome<>Bordetella_pertussis_chromosome	-	39	Candidate_308_NC_002927(opp),Candidate_47_NC_002927(para),Candidate_224_NC_002927(para),Candidate_21_NC_002927(para),Candidate_69_NC_002927(para),Candidate_310_NC_002927(para),Candidate_20_NC_002927(para),Candidate_48_NC_002927(para),Candidate_91_NC_002927(para),Candidate_49_NC_002927(para),Candidate_25_NC_002927(para),Candidate_197_NC_002927(para),Candidate_24_NC_002927(para),Candidate_33_NC_002…	Cobalamin1_NC_002516|UD(5'(1-1)|3'(1-0))	-	-	-
Bordetella_bronchiseptica	|	Candidate_321_NC_002927	|	BB4913		hypothetical protein	*	<<<	1	|	5222977	5223035	>>>	58	|	270	>>>	BB4914	putative ATP-dependent RNA helicase	*	candidate	1401	1.7e-57	F	2	-	Bordetella_parapertussis_chromosome<>Bordetella_pertussis_chromosome	-	0	-	C0343_NC_000913|3'(0),P36_yes_NC_002516|3'(0)	-	-	-
Bordetella_bronchiseptica	|	Candidate_322_NC_002927	|	BB4951		bifunctional	*	<<<	114	|	5264369	5264449	<<<	80	|	0	>>>	BB4952	hypothetical protein	*	candidate	957	2.8e-37	F	1	-	Bordetella_pertussis_chromosome	-	0	-	P20_yes_NC_002516|3'(0)	-	-	-
Bordetella_bronchiseptica	|	Candidate_330_NC_002927	|	BB0655		putative transcriptional regulator	*	<<<	1	|	690614	690673	>>>	59	|	126	>>>	BB0656	probable acyl-CoA dehydrogenase	*	candidate	911	4.8e-36	X	1	RNA	Bordetella_parapertussis_chromosome	-	0	-	Cobalamin3_NC_002516|3'(0),Cobalamin1_NC_002516|3'(0)	-	-	-
Bordetella_bronchiseptica	|	Candidate_331_NC_002927	|	BB0655		putative transcriptional regulator	*	<<<	1	|	690614	690731	>>>	117	|	68	>>>	BB0656	probable acyl-CoA dehydrogenase	*	candidate	911	4.8e-36	F	1	RNA	Bordetella_parapertussis_chromosome	-	0	-	Cobalamin3_NC_002516|3'(0),Cobalamin1_NC_002516|3'(0)	5	-	-
Bordetella_bronchiseptica	|	Candidate_334_NC_002927	|	BB0685		transcriptional regulator	*	>>>	294	|	721690	721787	<<<	97	|	0	>>>	BB0686	dihydrodipicolinate synthase	*	candidate	1942	4.6e-82	F	1	-	Bordetella_parapertussis_chromosome	-	0	-	Cobalamin4_NC_002516|3'(0)	-	-	-
Bordetella_bronchiseptica	|	Candidate_337_NC_002927	|	BB0849		hypothetical protein	*	>>>	1	|	896077	896162	>>>	85	|	67	>>>	BB0850	probable orn/arg/lys decarboxylase	*	candidate	770	1e-28	Z	2	RNA	Bordetella_parapertussis_chromosome<>Bordetella_pertussis_chromosome	-	0	-	P36_yes_NC_002516|3'(0)	5	-	-
Bordetella_bronchiseptica	|	Candidate_340_NC_002927	|	BB0095		malate synthase	*	<<<	16	|	94662	94888	<<<	226	|	0	>>>	BB0096	GntR-family transcriptional regulator	*	candidate	1125	1.4e-45	X	2	-	Bordetella_parapertussis_chromosome<>Bordetella_pertussis_chromosome	-	0	-	C0719_NC_000913|3'(0),Cobalamin1_NC_002516|3'(0),P11_yes_NC_002516|3'(0),P20_yes_NC_002516|3'(0)	5	-	-
Bordetella_bronchiseptica	|	Candidate_346_NC_002927	|	BB0916		autotransporter	*	<<<	445	|	988694	988823	<<<	129	|	0	>>>	BB0917	putative regulatory protein	*	candidate	2875	1.5e-124	F	1	-	Bordetella_parapertussis_chromosome	-	0	-	P15_yes_NC_002516|3'(0),Cobalamin2_NC_002516|3'(0),Cobalamin1_NC_002516|3'(0)	-	-	-
Bordetella_bronchiseptica	|	mini_ykkC_iter2_NC_002927	|	BB0818		hypothetical protein	*	>>>	1	|	862187	862251	>>>	64	|	31	>>>	BB0819	putative calcium/proton antiporter	*	mini_ykkC_iter2	485	7.2e-16	T	1	-	Bordetella_parapertussis_chromosome	-	0	-	Cobalamin1_NC_002516|UD(5'(1-0)|3'(0-0)),SRP_bact_NC_002516|UD(5'(0-1)|3'(1-1))	5	-	-
Bordetella_bronchiseptica	|	SRP_bact_NC_002927	|	BB1437		putative nuclease/helicase	*	>>>	2	|	1533806	1534264	>>>	458	|	107	>>>	BB1438	DNA polymerase III subunits gamma and tau	*	SRP_bact	1824	4.8e-77	T	2	RNA	Bordetella_parapertussis_chromosome<>Bordetella_pertussis_chromosome	-	31	Candidate_19_NC_002927(para),Candidate_24_NC_002927(para),Candidate_58_NC_002927(para),Candidate_111_NC_002927(para),Candidate_62_NC_002927(para),Candidate_63_NC_002927(para),Candidate_53_NC_002927(para),Candidate_54_NC_002927(para),Candidate_20_NC_002927(para),Candidate_21_NC_002927(para),Candidate_9_NC_002927(para),Candidate_300_NC_002927(para),Candidate_90_NC_002927(para),Candidate_89_NC_00292…	Cobalamin1_NC_002516|UD(5'(1-1)|3'(1-0)),SRP_bact_NC_002516|UD(5'(0-1)|3'(1-1)),Cobalamin2_NC_002516|UD(5'(0-1)|3'(1-1)),SRP_bact_NC_003047|3'(0),SRP_bact_NC_000964|3'(0),Cobalamin4_NC_002516|3'(0)	-	-	-
Bordetella_parapertussis	|	Candidate_9_NC_002928	|	BPP0285		hypothetical protein	*	>>>	1	|	297404	297506	>>>	102	|	246	>>>	BPP0286	hypothetical protein	*	candidate	1693	9.1e-71	T	2	-	Bordetella_bronchiseptica_chromosome<>Bordetella_pertussis_chromosome	-	0	Candidate_173_NC_002928(anti)	SokE_NC_000913|3'(0)	-	-	-
Bordetella_parapertussis	|	Candidate_10_NC_002928	|	BPP0472		cold shock protein	*	>>>	1	|	505658	505748	>>>	90	|	84	>>>	BPP0473	probable LysR-family transcriptional regulator	*	candidate	871	2.4e-33	T	1	RNA	Bordetella_bronchiseptica_chromosome	-	0	-	C22_NC_003047|3'(0)	-	-	-
Bordetella_parapertussis	|	Candidate_12_NC_002928	|	BPP0850		hypothetical protein	*	<<<	162	|	921811	921886	<<<	75	|	0	<<<	BPP0851	binding-protein-dependent transport system	*	candidate	1161	1.4e-46	T	1	RNA	Bordetella_bronchiseptica_chromosome	-	26	Candidate_41_NC_002928(para),SRP_bact_NC_002928(para),Candidate_40_NC_002928(para),Candidate_43_NC_002928(para),Candidate_44_NC_002928(para),Candidate_63_NC_002928(para),Candidate_93_NC_002928(para),Candidate_178_NC_002928(para),Candidate_141_NC_002928(para),Candidate_250_NC_002928(para),Candidate_64_NC_002928(para),Candidate_246_NC_002928(para),Candidate_16_NC_002928(para),Candidate_232_NC_00292…	Cobalamin1_NC_002516|3'(0),P15_yes_NC_002516|3'(0),P16_yes_NC_002516|3'(0)	3	-	-
Bordetella_parapertussis	|	Candidate_14_NC_002928	|	BPP1119		putative membrane transport protein	*	>>>	1	|	1193506	1193615	>>>	109	|	2	<<<	BPP1120	hypothetical protein	*	candidate	565	2.5e-19	T	1	RNA	Bordetella_bronchiseptica_chromosome	-	18	Candidate_52_NC_002928(para),Candidate_18_NC_002928(para),Candidate_141_NC_002928(para),Candidate_250_NC_002928(para),Candidate_63_NC_002928(para),Candidate_178_NC_002928(para),Candidate_64_NC_002928(para),Candidate_40_NC_002928(para),Candidate_65_NC_002928(para),Candidate_204_NC_002928(para),Candidate_25_NC_002928(para),Candidate_26_NC_002928(para),Candidate_21_NC_002928(para),Candidate_12_NC_00…	Cobalamin1_NC_002516|UD(5'(0-1)|3'(0-0))	-	-	-
Bordetella_parapertussis	|	Candidate_15_NC_002928	|	BPP1337		putative gntR-family transcriptional regulator	*	<<<	107	|	1440933	1441073	<<<	140	|	0	<<<	BPP1338	hypothetical protein	*	candidate	1153	3.1e-46	T	2	RNA	Bordetella_bronchiseptica_chromosome<>Bordetella_pertussis_chromosome	-	0	-	Cobalamin1_NC_002516|UD(5'(1-0)|3'(0-0))	-	-	-
Bordetella_parapertussis	|	Candidate_19_NC_002928	|	BPP1586		hypothetical protein	*	>>>	1	|	1693936	1694003	>>>	67	|	109	<<<	BPP1587	probable two-component response regulator	*	candidate	890	3.3e-34	B	1	RNA	Bordetella_bronchiseptica_chromosome	-	0	-	P32_yes_NC_002516|3'(0),P20_yes_NC_002516|3'(0)	-	-	-
Bordetella_parapertussis	|	Candidate_26_NC_002928	|	trRNA		trRNA	*	>>>	1	|	2450817	2450991	>>>	174	|	50	<<<	BPP2305	probable NADH-dependent flavin oxidoreductase	*	candidate	673	1.5e-24	T	2	RNA	Bordetella_bronchiseptica_chromosome<>Bordetella_pertussis_chromosome	-	27	Candidate_25_NC_002928(anti),Candidate_178_NC_002928(para),Candidate_65_NC_002928(para),Candidate_250_NC_002928(para),Candidate_64_NC_002928(para),Candidate_40_NC_002928(para),Candidate_63_NC_002928(para),Candidate_21_NC_002928(para),Candidate_27_NC_002928(para),Candidate_232_NC_002928(para),Candidate_43_NC_002928(para),Candidate_44_NC_002928(para),SRP_bact_NC_002928(para),Candidate_12_NC_002928(…	P11_yes_NC_002516|3'(0)	-	-	-E.coli_sig70_2(7.49|-266)E.coli_sig70_3(10.66|-266)
Bordetella_parapertussis	|	Candidate_28_NC_002928	|	BPP2487		hypothetical protein	*	>>>	1	|	2667385	2667447	>>>	62	|	192	>>>	BPP2488	3-deoxy-7-phosphoheptulonate synthase	*	candidate	1244	2.3e-50	T	2	COD	Bordetella_bronchiseptica_chromosome<>Bordetella_pertussis_chromosome	-	1	Candidate_158_NC_002928(opp)	Cobalamin1_NC_002516|UD(5'(0-0)|3'(1-0)),P15_yes_NC_002516|3'(0)	-	-	-
Bordetella_parapertussis	|	Candidate_42_NC_002928	|	BPP3725		ABC transport protein, ATP-binding component	*	<<<	80	|	4025637	4025720	<<<	83	|	0	<<<	BPP3726	hypothetical protein	*	candidate	820	5.2e-31	T	2	RNA	Bordetella_bronchiseptica_chromosome<>Bordetella_pertussis_chromosome	-	0	-	Cobalamin2_NC_002516|UD(5'(1-1)|3'(0-1)),S_box9_NC_000964|3'(0)	-	-	-
Bordetella_parapertussis	|	Candidate_46_NC_002928	|	BPP3902		indolepyruvate ferredoxin oxidoreductase	*	>>>	1	|	4226968	4227246	>>>	278	|	25	>>>	BPP3903	ribonucleotide-diphosphate reductase alpha	*	candidate	1498	1e-61	T	2	RNA	Bordetella_bronchiseptica_chromosome<>Bordetella_pertussis_chromosome	-	0	-	SRP_bact_NC_002516|UD(5'(0-1)|3'(0-1))	5	-	-E.coli_sig70_1(10.64|-424)E.coli_sig70_2(7.79|-153)
Bordetella_parapertussis	|	Candidate_49_NC_002928	|	BPP4143		hypothetical protein	*	<<<	215	|	4478998	4479078	<<<	80	|	0	<<<	BPP4144	enoyl-CoA hydratase	*	candidate	1435	1.1e-59	T	2	RNA	Bordetella_bronchiseptica_chromosome<>Bordetella_pertussis_chromosome	-	0	-	Cobalamin1_NC_002516|3'(0)	-	-	-
Bordetella_parapertussis	|	Candidate_50_NC_002928	|	BPP4224		hypothetical protein	*	<<<	598	|	4563256	4563353	<<<	97	|	132	<<<	BPP4226	putative glycosyl transferase	*	candidate	478	6.8e-16	T	7	-	Bordetella_pertussis_chromosome<>Burkholderia_mallei_ATCC_23344_chromosome_1<>Burkholderia_mallei_ATCC_23344_chromosome_2<>Burkholderia_pseudomallei_K96243_chromosome_1<>Burkholderia_pseudomallei_1710b_chromosome_2<>Anaeromyxobacter_dehalogenans_2CP-C_chromosome<>Mycobacterium_ulcerans_Agy99_chromosome	-	0	-	Cobalamin1_NC_002516|3'(0),P20_yes_NC_002516|3'(0)	-	-	-
Bordetella_parapertussis	|	Candidate_54_NC_002928	|	BPP0103		putative dihydrodipicolinate synthase	*	>>>	1	|	102885	103194	>>>	309	|	36	>>>	BPP0104	putative adhesin	*	candidate	1269	3.1e-52	F	1	-	Bordetella_pertussis_chromosome	-	0	-	SRP_bact_NC_002516|UD(5'(0-1)|3'(0-1)),Cobalamin1_NC_002516|3'(0),P11_yes_NC_002516|3'(0)	5	-	-
Bordetella_parapertussis	|	Candidate_56_NC_002928	|	BPP1023		putative phosphoesterase	*	<<<	221	|	1098802	1098869	<<<	67	|	0	>>>	BPP1024	cytochrome oxidase subunit I	*	candidate	826	1.9e-31	F	1	RNA	Bordetella_bronchiseptica_chromosome	-	0	Candidate_57_NC_002928(anti)	Cobalamin2_NC_002516|3'(0),Cobalamin1_NC_002516|3'(0),P20_yes_NC_002516|3'(0)	-	-	-
Bordetella_parapertussis	|	Candidate_57_NC_002928	|	BPP1023		putative phosphoesterase	*	<<<	94	|	1098675	1098842	>>>	167	|	27	>>>	BPP1024	cytochrome oxidase subunit I	*	candidate	826	1.9e-31	F	1	RNA	Bordetella_bronchiseptica_chromosome	-	18	Candidate_56_NC_002928(anti),Candidate_142_NC_002928(para),Candidate_63_NC_002928(para),Candidate_93_NC_002928(para),Candidate_178_NC_002928(para),Candidate_204_NC_002928(para),Candidate_64_NC_002928(para),Candidate_43_NC_002928(para),Candidate_44_NC_002928(para),Candidate_67_NC_002928(para),Candidate_25_NC_002928(para),Candidate_26_NC_002928(para),Candidate_40_NC_002928(para),SRP_bact_NC_002928(…	P20_yes_NC_002516|3'(0)	5	RS	-
Bordetella_parapertussis	|	Candidate_60_NC_002928	|	BPP1058		putative LysR-family transcriptional regulator	*	<<<	1	|	1134319	1134430	>>>	111	|	12	>>>	BPP1059	putative racemase	*	candidate	625	4.4e-22	F	1	-	Bordetella_bronchiseptica_chromosome	-	0	-	yybP1ykoY_NC_002516|UD(5'(1-1)|3'(0-1)),Cobalamin1_NC_002516|3'(0)	5	-	-
Bordetella_parapertussis	|	Candidate_70_NC_002928	|	BPP1255		putative transcriptional regulator	*	>>>	1	|	1351502	1351681	>>>	179	|	68	>>>	BPP1256	autotransporter	*	candidate	1101	1.3e-43	F	2	RNA	Bordetella_bronchiseptica_chromosome<>Bordetella_pertussis_chromosome	-	0	-	Cobalamin2_NC_002516|3'(0)	5	-	-
Bordetella_parapertussis	|	Candidate_76_NC_002928	|	BPP1420		putative oxidoreductase	*	>>>	1	|	1520135	1520245	>>>	110	|	10	<<<	trRNA	trRNA	*	candidate	583	3.7e-20	Y	1	RNA	Bordetella_pertussis_chromosome	-	14	Candidate_246_NC_002928(para),Candidate_18_NC_002928(para),Candidate_232_NC_002928(para),Candidate_64_NC_002928(para),Candidate_25_NC_002928(para),Candidate_26_NC_002928(para),Candidate_178_NC_002928(para),Candidate_93_NC_002928(para),Candidate_21_NC_002928(para),Candidate_141_NC_002928(para),Candidate_43_NC_002928(para),Candidate_44_NC_002928(para),Candidate_27_NC_002928(para),Candidate_12_NC_00…	Cobalamin1_NC_002516|UD(5'(1-0)|3'(0-0)),P36_yes_NC_002516|3'(0),P20_yes_NC_002516|3'(0)	-	-	-
Bordetella_parapertussis	|	Candidate_78_NC_002928	|	BPP1562		hypothetical protein	*	>>>	5	|	1668767	1668858	>>>	91	|	98	>>>	BPP1563	probable transcriptional regulator	*	candidate	918	1e-35	Z	2	RNA	Bordetella_bronchiseptica_chromosome<>Bordetella_pertussis_chromosome	-	14	Candidate_65_NC_002928(para),Candidate_250_NC_002928(para),Candidate_40_NC_002928(para),Candidate_178_NC_002928(para),Candidate_204_NC_002928(para),Candidate_25_NC_002928(para),Candidate_26_NC_002928(para),Candidate_41_NC_002928(para),Candidate_23_NC_002928(para),Candidate_16_NC_002928(para),Candidate_12_NC_002928(para),Candidate_44_NC_002928(para),Candidate_141_NC_002928(para),Candidate_27_NC_00…	Cobalamin1_NC_002516|3'(0)	-	RS	-
Bordetella_parapertussis	|	Candidate_88_NC_002928	|	trRNA		trRNA	*	>>>	8	|	1845853	1845958	<<<	105	|	14	<<<	BPP1723	hypothetical protein	*	candidate	547	3.6e-19	F	1	RNA	Bordetella_bronchiseptica_chromosome	-	8	Candidate_16_NC_002928(para),Candidate_39_NC_002928(para),Candidate_57_NC_002928(para),Candidate_178_NC_002928(para),Candidate_12_NC_002928(para),Candidate_250_NC_002928(para),Candidate_141_NC_002928(para),Candidate_65_NC_002928(para)	rne5_NC_000913|3'(0),Cobalamin2_NC_002516|3'(0)	-	-	-
Bordetella_parapertussis	|	Candidate_97_NC_002928	|	BPP0179		hypothetical protein	*	<<<	144	|	192627	192758	<<<	131	|	0	<<<	BPP0180	putative regulatory protein	*	candidate	1326	4.3e-54	F	2	-	Bordetella_bronchiseptica_chromosome<>Bordetella_pertussis_chromosome	-	0	-	Cobalamin3_NC_002516|3'(0)	-	-	-
Bordetella_parapertussis	|	Candidate_99_NC_002928	|	BPP1814		ATP-dependent protease, ATPase subunit	*	>>>	1	|	1938410	1938483	>>>	73	|	241	>>>	BPP1815	autotransporter	*	candidate	1385	3.4e-57	Z	2	RNA	Bordetella_bronchiseptica_chromosome<>Bordetella_pertussis_chromosome	-	0	-	SRP_bact_NC_002516|UD(5'(0-1)|3'(0-1))	-	-	-
Bordetella_parapertussis	|	Candidate_116_NC_002928	|	BPP1962		probable two-component response regulator	*	<<<	1	|	2099407	2099732	>>>	325	|	24	>>>	BPP1963	threonyl-tRNA synthetase	*	candidate	1746	2.5e-73	X	2	RNA	Bordetella_bronchiseptica_chromosome<>Bordetella_pertussis_chromosome	-	0	Candidate_115_NC_002928(anti)	T1box15_NC_000964|3'(0),T1box16_NC_000964|3'(0),T1box17_NC_000964|3'(0),T1box12_NC_000964|3'(0),T1box6_NC_003210|3'(0)	5	-	-
Bordetella_parapertussis	|	Candidate_117_NC_002928	|	BPP1968		phosphoenolpyruvate-protein phosphotransferase	*	>>>	15	|	2105991	2106139	<<<	148	|	0	<<<	BPP1968A	hypothetical protein	*	candidate	802	3.4e-30	X	2	RNA	Bordetella_bronchiseptica_chromosome<>Bordetella_pertussis_chromosome	-	0	-	P36_yes_NC_002516|3'(0)	-	-	-
Bordetella_parapertussis	|	Candidate_136_NC_002928	|	BPP2138		hypothetical protein	*	<<<	46	|	2286810	2286969	<<<	159	|	0	>>>	BPP2139	Putative LysR-family transcriptional regulator	*	candidate	994	5.7e-39	F	1	-	Bordetella_bronchiseptica_chromosome	-	0	-	P20_yes_NC_002516|3'(0)	-	-	-
Bordetella_parapertussis	|	Candidate_137_NC_002928	|	BPP2166		probable aldehyde dehydrogenase	*	<<<	1	|	2315915	2316035	>>>	120	|	59	>>>	trRNA	trRNA	*	candidate	878	4.9e-34	F	2	RNA	Bordetella_bronchiseptica_chromosome<>Bordetella_pertussis_chromosome	-	1	Candidate_138_NC_002928(opp)	Cobalamin1_NC_002516|UD(5'(0-0)|3'(0-0)),Cobalamin2_NC_002516|3'(0),P26_yes_NC_002516|3'(0)	5	RS	-
Bordetella_parapertussis	|	Candidate_143_NC_002928	|	trRNA		trRNA	*	>>>	1	|	2450817	2450906	>>>	89	|	135	<<<	BPP2305	probable NADH-dependent flavin oxidoreductase	*	candidate	673	1.5e-24	Z	2	RNA	Bordetella_bronchiseptica_chromosome<>Bordetella_pertussis_chromosome	-	0	Candidate_25_NC_002928(anti)	P11_yes_NC_002516|3'(0)	-	-	-E.coli_sig70_2(7.49|-181)E.coli_sig70_3(10.66|-181)
Bordetella_parapertussis	|	Candidate_144_NC_002928	|	BPP2318		putative hemin storage protein	*	<<<	14	|	2465448	2465641	<<<	193	|	0	>>>	BPP2319	hypothetical protein	*	candidate	1004	2e-39	F	2	-	Bordetella_bronchiseptica_chromosome<>Bordetella_pertussis_chromosome	-	0	-	Cobalamin2_NC_002516|3'(0)	5	-	-
Bordetella_parapertussis	|	Candidate_147_NC_002928	|	BPP2368		hypothetical protein	*	<<<	18	|	2532517	2532802	<<<	285	|	0	<<<	BPP2369	hypothetical protein	*	candidate	1241	4.4e-51	F	2	RNA	Bordetella_bronchiseptica_chromosome<>Bordetella_pertussis_chromosome	-	0	-	Cobalamin1_NC_002516|3'(0),Cobalamin2_NC_002516|3'(0),P15_yes_NC_002516|3'(0),Cobalamin4_NC_002516|3'(0)	5	-	-
Bordetella_parapertussis	|	Candidate_150_NC_002928	|	BPP2395		putative lipoprotein	*	<<<	1	|	2560469	2560607	>>>	138	|	136	>>>	BPP2396	putative ferric siderophore receptor	*	candidate	1317	1.1e-53	F	2	RNA	Bordetella_bronchiseptica_chromosome<>Bordetella_pertussis_chromosome	-	0	-	Cobalamin2_NC_002516|3'(0),Cobalamin1_NC_002516|3'(0)	-	-	-
Bordetella_parapertussis	|	Candidate_156_NC_002928	|	BPP2456		RNA polymerase sigma-70 factor	*	<<<	1	|	2633320	2633448	>>>	128	|	78	>>>	BPP2457	putative extracellular heme-binding protein	*	candidate	1031	1.2e-40	F	1	-	Bordetella_bronchiseptica_chromosome	-	0	-	Cobalamin1_NC_002516|UD(5'(1-0)|3'(0-0))	5	-	-
Bordetella_parapertussis	|	Candidate_159_NC_002928	|	BPP2487		hypothetical protein	*	>>>	1	|	2667385	2667602	>>>	217	|	37	>>>	BPP2488	3-deoxy-7-phosphoheptulonate synthase	*	candidate	1244	2.3e-50	Z	2	COD	Bordetella_bronchiseptica_chromosome<>Bordetella_pertussis_chromosome	-	0	Candidate_158_NC_002928(anti)	Cobalamin1_NC_002516|UD(5'(0-0)|3'(1-0)),P15_yes_NC_002516|3'(0)	5	-	-
Bordetella_parapertussis	|	Candidate_176_NC_002928	|	BPP2845		ATP phosphoribosyltransferase regulatory	*	<<<	51	|	3046929	3047060	<<<	131	|	0	<<<	BPP2846	putative inner membrane-anchored protein	*	candidate	906	6.1e-35	Y	2	RNA	Bordetella_bronchiseptica_chromosome<>Bordetella_pertussis_chromosome	-	0	-	Cobalamin1_NC_002516|3'(0)	-	-	-
Bordetella_parapertussis	|	Candidate_182_NC_002928	|	BPP2980		putative iron binding protein	*	>>>	1	|	3205262	3205375	>>>	113	|	8	>>>	BPP2981	putative inner membrane component of	*	candidate	615	1.3e-21	Z	2	RNA	Bordetella_bronchiseptica_chromosome<>Bordetella_pertussis_chromosome	-	0	-	P20_yes_NC_002516|3'(0),Cobalamin1_NC_002516|3'(0),P15_yes_NC_002516|3'(0)	5	-	-
Bordetella_parapertussis	|	Candidate_186_NC_002928	|	BPP3044		peptidyl-prolyl cis-trans isomerase D	*	<<<	-1	|	3285191	3285373	<<<	182	|	0	>>>	BPP3045	cytoplasmic glycerophosphodiester	*	candidate	892	2e-34	F	2	-	Bordetella_bronchiseptica_chromosome<>Bordetella_pertussis_chromosome	-	0	-	Cobalamin4_NC_002516|3'(0),SRP_bact_NC_003047|3'(0),P11_yes_NC_002516|3'(0),P15_yes_NC_002516|3'(0)	5	-	-
Bordetella_parapertussis	|	Candidate_189_NC_002928	|	BPP0320		cyclolysin-activating lysine-acyltransferase	*	<<<	1	|	335734	335833	>>>	99	|	219	>>>	BPP0321	bifunctional hemolysin-adenylate cyclase	*	candidate	1558	8.3e-65	F	2	-	Bordetella_bronchiseptica_chromosome<>Bordetella_pertussis_chromosome	-	0	-	Cobalamin1_NC_002516|3'(0)	-	-	-
Bordetella_parapertussis	|	Candidate_206_NC_002928	|	BPP3334		endonuclease III	*	>>>	-17	|	3592589	3592864	<<<	275	|	0	>>>	BPP3335	ABC transporter ATP-binding protein	*	candidate	1262	3.6e-51	F	2	-	Bordetella_bronchiseptica_chromosome<>Bordetella_pertussis_chromosome	-	0	-	yybP1ykoY_NC_002516|UD(5'(0-1)|3'(1-1))	-	-	-
Bordetella_parapertussis	|	Candidate_211_NC_002928	|	BPP3432		30S ribosomal protein S15	*	<<<	55	|	3707749	3707986	<<<	237	|	0	>>>	BPP3433	putative lipoprotein	*	candidate	1456	5.4e-60	F	2	RNA	Bordetella_bronchiseptica_chromosome<>Bordetella_pertussis_chromosome	-	0	-	S15_NC_000913|3'(0),sraG_p3_NC_000913|3'(0)	-	-	-
Bordetella_parapertussis	|	Candidate_224_NC_002928	|	BPP3722		putative alcohol dehydrogenase	*	<<<	222	|	4022737	4022800	<<<	63	|	7	<<<	trRNA	trRNA	*	candidate	737	1.5e-27	Y	2	RNA	Bordetella_bronchiseptica_chromosome<>Bordetella_pertussis_chromosome	-	0	Candidate_225_NC_002928(anti)	P20_yes_NC_002516|3'(0),Cobalamin1_NC_002516|3'(0)	3	-	-E.coli_sig70_2(9.9|-161)
Bordetella_parapertussis	|	Candidate_226_NC_002928	|	trRNA		trRNA	*	<<<	39	|	4022923	4023012	<<<	89	|	0	<<<	BPP3723	hypothetical protein	*	candidate	582	3.7e-20	F	2	-	Bordetella_bronchiseptica_chromosome<>Bordetella_pertussis_chromosome	-	0	-	P20_yes_NC_002516|3'(0),Cobalamin1_NC_002516|3'(0)	-	-	-
Bordetella_parapertussis	|	Candidate_227_NC_002928	|	trRNA		trRNA	*	<<<	55	|	4022939	4023012	<<<	73	|	0	<<<	BPP3723	hypothetical protein	*	candidate	582	3.7e-20	Y	2	-	Bordetella_bronchiseptica_chromosome<>Bordetella_pertussis_chromosome	-	0	-	P20_yes_NC_002516|3'(0),Cobalamin1_NC_002516|3'(0)	3	-	-
Bordetella_parapertussis	|	Candidate_228_NC_002928	|	BPP3726		hypothetical protein	*	<<<	1	|	4027948	4028079	>>>	131	|	161	<<<	BPP3727	hypothetical protein	*	candidate	1461	4.4e-61	F	2	-	Bordetella_bronchiseptica_chromosome<>Bordetella_pertussis_chromosome	-	0	-	yybP1ykoY_NC_002516|UD(5'(1-1)|3'(0-1)),P20_yes_NC_002516|3'(0),Cobalamin1_NC_002516|3'(0),P34_yes_NC_002516|3'(0)	-	-	-E.coli_sig70_1(7.91|-58)
Bordetella_parapertussis	|	Candidate_236_NC_002928	|	BPP3977		putative permease protein	*	>>>	157	|	4306393	4306446	<<<	53	|	0	>>>	BPP3978	hypothetical protein	*	candidate	1055	9.8e-42	F	2	RNA	Bordetella_bronchiseptica_chromosome<>Bordetella_pertussis_chromosome	-	0	-	Cobalamin4_NC_002516|UD(5'(1-1)|3'(0-0)),P16_yes_NC_002516|3'(0)	-	-	-
Bordetella_parapertussis	|	Candidate_244_NC_002928	|	BPP4245		putative sodium/hydrogen exchanger family	*	<<<	59	|	4583328	4583379	<<<	51	|	0	>>>	BPP4246	hypothetical protein	*	candidate	546	1.1e-18	F	2	-	Bordetella_bronchiseptica_chromosome<>Bordetella_pertussis_chromosome	-	0	-	P20_yes_NC_002516|3'(0)	-	-	-
Bordetella_parapertussis	|	Candidate_249_NC_002928	|	BPP0451		entericidin A anti-toxin precursor	*	>>>	1	|	477608	477731	>>>	123	|	321	>>>	BPP0452	autotransporter	*	candidate	2140	3.3e-91	F	2	-	Bordetella_bronchiseptica_chromosome<>Bordetella_pertussis_chromosome	-	0	-	P20_yes_NC_002516|3'(0),P34_yes_NC_002516|3'(0),Cobalamin1_NC_002516|3'(0)	-	-	-
Bordetella_parapertussis	|	Candidate_250_NC_002928	|	BPP0453		hypothetical protein	*	>>>	43	|	484039	484149	>>>	110	|	157	>>>	BPP0454	hypothetical protein	*	candidate	1263	3.1e-51	Z	2	RNA	Bordetella_bronchiseptica_chromosome<>Bordetella_pertussis_chromosome	-	26	Candidate_251_NC_002928(opp),Candidate_178_NC_002928(para),Candidate_65_NC_002928(para),Candidate_25_NC_002928(para),Candidate_26_NC_002928(para),Candidate_40_NC_002928(para),Candidate_12_NC_002928(para),Candidate_16_NC_002928(para),Candidate_64_NC_002928(para),Candidate_43_NC_002928(para),Candidate_44_NC_002928(para),Candidate_63_NC_002928(para),Candidate_142_NC_002928(para),Candidate_78_NC_0029…	Cobalamin1_NC_002516|UD(5'(1-1)|3'(1-0))	-	-	-
Bordetella_parapertussis	|	Candidate_257_NC_002928	|	BPP0073		deoxyguanosinetriphosphate	*	>>>	1	|	68975	69131	>>>	156	|	732	<<<	BPP0075	excinuclease ABC subunit A	*	candidate	865	4.6e-33	Y	2	RNA	Bordetella_bronchiseptica_chromosome<>Bordetella_pertussis_chromosome	-	0	-	Cobalamin1_NC_002516|3'(0)	-	-	-
Bordetella_parapertussis	|	Candidate_259_NC_002928	|	BPP0678		transcriptional regulator	*	>>>	294	|	717341	717438	<<<	97	|	0	>>>	BPP0679	dihydrodipicolinate synthase	*	candidate	1942	4.6e-82	F	1	-	Bordetella_bronchiseptica_chromosome	-	0	-	Cobalamin4_NC_002516|3'(0)	-	-	-
Bordetella_parapertussis	|	Candidate_261_NC_002928	|	BPP0763		putative acetyltransferase	*	<<<	551	|	812126	812211	>>>	85	|	67	>>>	BPP0765	probable orn/arg/lys decarboxylase	*	candidate	770	1e-28	X	2	RNA	Bordetella_bronchiseptica_chromosome<>Bordetella_pertussis_chromosome	-	0	-	P36_yes_NC_002516|3'(0)	5	-	-
Bordetella_parapertussis	|	Candidate_266_NC_002928	|	BPP0822		autotransporter	*	<<<	760	|	888166	888295	<<<	129	|	0	>>>	BPP0823	putative regulatory protein	*	candidate	2875	2.2e-124	F	1	-	Bordetella_bronchiseptica_chromosome	-	0	-	P15_yes_NC_002516|3'(0),Cobalamin2_NC_002516|3'(0),P20_yes_NC_002516|3'(0),Cobalamin1_NC_002516|3'(0)	-	-	-
Bordetella_parapertussis	|	Candidate_268_NC_002928	|	BPP0096		malate synthase	*	<<<	16	|	95858	96084	<<<	226	|	0	>>>	BPP0097	GntR-family transcriptional regulator	*	candidate	1107	9.2e-45	X	2	-	Bordetella_bronchiseptica_chromosome<>Bordetella_pertussis_chromosome	-	0	-	C0719_NC_000913|3'(0),Cobalamin1_NC_002516|3'(0),P11_yes_NC_002516|3'(0),P20_yes_NC_002516|3'(0)	5	-	-
Bordetella_parapertussis	|	Candidate_270_NC_002928	|	BPP0898		hypothetical protein	*	<<<	53	|	971341	971428	<<<	87	|	0	<<<	BPP0899	probable pyridine nucleotide-disulphide	*	candidate	690	4.5e-25	Y	1	RNA	Bordetella_bronchiseptica_chromosome	-	0	Candidate_271_NC_002928(anti)	P20_yes_NC_002516|3'(0)	-	-	-
Bordetella_parapertussis	|	SRP_bact_NC_002928	|	BPP1220		putative nuclease/helicase	*	>>>	2	|	1300927	1301385	>>>	458	|	242	>>>	BPP1221	DNA polymerase III subunits gamma and tau	*	SRP_bact	2490	3.9e-107	T	2	RNA	Bordetella_bronchiseptica_chromosome<>Bordetella_pertussis_chromosome	-	18	Candidate_43_NC_002928(para),Candidate_44_NC_002928(para),Candidate_12_NC_002928(para),Candidate_204_NC_002928(para),Candidate_41_NC_002928(para),Candidate_141_NC_002928(para),Candidate_63_NC_002928(para),Candidate_40_NC_002928(para),Candidate_232_NC_002928(para),Candidate_16_NC_002928(para),Candidate_23_NC_002928(para),Candidate_25_NC_002928(para),Candidate_26_NC_002928(para),Candidate_178_NC_00…	Cobalamin1_NC_002516|UD(5'(1-1)|3'(1-0)),Cobalamin2_NC_002516|UD(5'(1-1)|3'(0-0)),SRP_bact_NC_002516|UD(5'(0-1)|3'(1-1)),Cobalamin3_NC_002516|UD(5'(0-0)|3'(1-0)),SRP_bact_NC_003047|3'(0),SRP_bact_NC_000964|3'(0)	-	-	-
Bordetella_pertussis	|	Candidate_3_NC_002929	|	BP0586		ferredoxin	*	<<<	1	|	593095	593373	>>>	278	|	189	>>>	BP0589	hypothetical protein	*	candidate	2228	4.6e-95	R	2	RNA	Bordetella_bronchiseptica_chromosome<>Bordetella_parapertussis_chromosome	-	0	-	Cobalamin1_NC_002516|UD(5'(1-0)|3'(1-0)),P18_yes_NC_002516|UD(5'(1-0)|3'(1-1))	-	-	-
Bordetella_pertussis	|	Candidate_12_NC_002929	|	BP0242		phosphoribosylaminoimidazole synthetase	*	>>>	1	|	250740	250845	>>>	105	|	-2	<<<	BP0243	tRNA delta(2)-isopentenylpyrophosphate	*	candidate	525	1.7e-17	T	1	RNA	Bordetella_parapertussis_chromosome	-	20	Candidate_100_NC_002929(para),Candidate_28_NC_002929(para),Candidate_13_NC_002929(para),Candidate_34_NC_002929(para),Candidate_35_NC_002929(para),Candidate_29_NC_002929(para),Candidate_43_NC_002929(para),Candidate_44_NC_002929(para),Candidate_18_NC_002929(para),Candidate_127_NC_002929(para),Candidate_196_NC_002929(para),Candidate_25_NC_002929(para),Candidate_1_NC_002929(para),Candidate_200_NC_002…	Cobalamin1_NC_002516|3'(0)	-	-	-
Bordetella_pertussis	|	Candidate_13_NC_002929	|	BP0245		hypothetical protein	*	>>>	1	|	254398	254478	>>>	80	|	60	<<<	BP0246	N-acetylmuramoyl-L-alanine amidase	*	candidate	674	2.3e-24	T	2	RNA	Bordetella_bronchiseptica_chromosome<>Bordetella_parapertussis_chromosome	-	25	Candidate_28_NC_002929(para),Candidate_29_NC_002929(para),Candidate_12_NC_002929(para),Candidate_34_NC_002929(para),Candidate_35_NC_002929(para),Candidate_100_NC_002929(para),Candidate_31_NC_002929(para),Candidate_43_NC_002929(para),Candidate_44_NC_002929(para),Candidate_127_NC_002929(para),Candidate_1_NC_002929(para),Candidate_200_NC_002929(para),Candidate_18_NC_002929(para),Candidate_33_NC_0029…	Cobalamin1_NC_002516|UD(5'(1-1)|3'(0-1))	-	-	-
Bordetella_pertussis	|	Candidate_16_NC_002929	|	BP0597		hypothetical protein	*	>>>	1	|	604035	604137	>>>	102	|	244	>>>	BP0598	hypothetical protein	*	candidate	1693	9e-71	T	2	RNA	Bordetella_bronchiseptica_chromosome<>Bordetella_parapertussis_chromosome	-	0	-	SokE_NC_000913|3'(0)	-	-	-
Bordetella_pertussis	|	Candidate_30_NC_002929	|	BP2141		hypothetical protein	*	>>>	1	|	2265616	2265754	>>>	138	|	107	>>>	BP2142	putative gntR-family transcriptional regulator	*	candidate	1153	3.1e-46	T	2	RNA	Bordetella_bronchiseptica_chromosome<>Bordetella_parapertussis_chromosome	-	0	-	Cobalamin1_NC_002516|UD(5'(1-0)|3'(0-0))	-	-	-
Bordetella_pertussis	|	Candidate_35_NC_002929	|	BP2497		putative zinc protease	*	>>>	65	|	2646498	2646600	<<<	102	|	0	<<<	BP2498	molecular chaperone	*	candidate	822	4.1e-31	T	1	RNA	Bordetella_bronchiseptica_chromosome	-	23	Candidate_34_NC_002929(anti),Candidate_28_NC_002929(para),Candidate_13_NC_002929(para),Candidate_12_NC_002929(para),Candidate_29_NC_002929(para),Candidate_100_NC_002929(para),Candidate_33_NC_002929(para),Candidate_195_NC_002929(para),Candidate_196_NC_002929(para),Candidate_25_NC_002929(para),Candidate_1_NC_002929(para),Candidate_200_NC_002929(para),Candidate_127_NC_002929(para),Candidate_31_NC_00…	Cobalamin2_NC_002516|3'(0)	-	-	-
Bordetella_pertussis	|	Candidate_38_NC_002929	|	BP2771		conserved integral membrane protein	*	>>>	1	|	2948273	2948349	>>>	76	|	122	>>>	BP2772	hypothetical protein	*	candidate	1000	4.8e-40	B	2	RNA	Bordetella_bronchiseptica_chromosome<>Bordetella_parapertussis_chromosome	-	0	Candidate_9_NC_002929(anti)	P18_yes_NC_002516|UD(5'(0-0)|3'(0-1)),Cobalamin1_NC_002516|UD(5'(0-0)|3'(0-0))	-	-	-
Bordetella_pertussis	|	Candidate_39_NC_002929	|	BP2815		hypothetical protein	*	>>>	1	|	2993637	2993719	>>>	82	|	80	>>>	BP2816	ABC transport protein, ATP-binding component	*	candidate	820	5.2e-31	T	2	RNA	Bordetella_bronchiseptica_chromosome<>Bordetella_parapertussis_chromosome	-	0	-	S_box9_NC_000964|3'(0)	-	-	-
Bordetella_pertussis	|	Candidate_71_NC_002929	|	BP1411		putative flagellar protein	*	<<<	1	|	1484206	1484376	>>>	170	|	90	>>>	BP1412	FolC bifunctional protein [includes:	*	candidate	481	3.6e-16	F	2	-	Bordetella_bronchiseptica_chromosome<>Bordetella_parapertussis_chromosome	-	0	-	Cobalamin1_NC_002516|3'(0)	-	-	-
Bordetella_pertussis	|	Candidate_76_NC_002929	|	BP1496		probable two-component response regulator	*	<<<	154	|	1574419	1574744	>>>	325	|	24	>>>	BP1497	threonyl-tRNA synthetase	*	candidate	1746	3.6e-73	X	2	-	Bordetella_bronchiseptica_chromosome<>Bordetella_parapertussis_chromosome	-	0	Candidate_75_NC_002929(anti)	T1box12_NC_000964|3'(0),T1box15_NC_000964|3'(0),T1box16_NC_000964|3'(0),T1box17_NC_000964|3'(0),T1box6_NC_003210|3'(0)	5	-	-
Bordetella_pertussis	|	Candidate_83_NC_002929	|	BP1604		putative inner membrane component of	*	<<<	8	|	1685297	1685411	<<<	114	|	0	<<<	BP1605	putative iron binding protein	*	candidate	615	1.3e-21	Z	2	RNA	Bordetella_bronchiseptica_chromosome<>Bordetella_parapertussis_chromosome	-	0	-	P20_yes_NC_002516|3'(0),Cobalamin1_NC_002516|3'(0),P15_yes_NC_002516|3'(0)	5	-	-
Bordetella_pertussis	|	Candidate_85_NC_002929	|	BP1618		putative N-terminal region of capsular	*	<<<	27	|	1702316	1702425	<<<	109	|	0	<<<	BP1619	hypothetical protein	*	candidate	685	8.2e-25	F	2	RNA	Bordetella_bronchiseptica_chromosome<>Bordetella_parapertussis_chromosome	-	8	Candidate_119_NC_002929(para),Candidate_120_NC_002929(para),Candidate_58_NC_002929(para),Candidate_59_NC_002929(para),Candidate_36_NC_002929(para),Candidate_140_NC_002929(para),Candidate_56_NC_002929(para),Candidate_172_NC_002929(para)	SRP_bact_NC_002516|UD(5'(0-1)|3'(0-1)),P1_yes_NC_002516|3'(0)	5	RS	-
Bordetella_pertussis	|	Candidate_87_NC_002929	|	BP1652		putative oxidoreductase (Partial)	*	<<<	257	|	1739249	1739326	<<<	77	|	101	>>>	BP1653	transposase	*	candidate	1457	4.3e-60	X	2	RNA	Bordetella_bronchiseptica_chromosome<>Bordetella_parapertussis_chromosome	-	4	Candidate_69_NC_002929(para),Candidate_106_NC_002929(para),Candidate_145_NC_002929(para),Candidate_152_NC_002929(para)	P11_yes_NC_002516|3'(0)	-	-	-
Bordetella_pertussis	|	Candidate_89_NC_002929	|	BP1731		cytoplasmic glycerophosphodiester	*	<<<	1	|	1815192	1815373	>>>	181	|	59	>>>	BP1732	peptidyl-prolyl cis-trans isomerase D	*	candidate	892	2.6e-34	F	2	-	Bordetella_bronchiseptica_chromosome<>Bordetella_parapertussis_chromosome	-	0	-	Cobalamin4_NC_002516|3'(0),P11_yes_NC_002516|3'(0)	5	-	-
Bordetella_pertussis	|	Candidate_96_NC_002929	|	BP1817		CDP-6-deoxy-delta-3,4-glucoseen reductase	*	>>>	1	|	1906866	1907035	>>>	169	|	24	>>>	BP1818	D-amino acid dehydrogenase small subunit	*	candidate	966	1.1e-37	F	2	RNA	Bordetella_bronchiseptica_chromosome<>Bordetella_parapertussis_chromosome	-	0	-	Cobalamin1_NC_002516|3'(0),P20_yes_NC_002516|3'(0)	5	-	-
Bordetella_pertussis	|	Candidate_97_NC_002929	|	BP0189		hypothetical protein	*	>>>	1	|	190626	190711	>>>	85	|	67	>>>	BP0190	probable orn/arg/lys decarboxylase	*	candidate	770	2.2e-29	Z	2	RNA	Bordetella_bronchiseptica_chromosome<>Bordetella_parapertussis_chromosome	-	0	-	P36_yes_NC_002516|3'(0)	5	-	-
Bordetella_pertussis	|	Candidate_98_NC_002929	|	BP1845		hypothetical protein	*	<<<	26	|	1937155	1937295	<<<	140	|	11	>>>	BP1846	hypothetical protein	*	candidate	830	1.8e-31	F	2	RNA	Bordetella_bronchiseptica_chromosome<>Bordetella_parapertussis_chromosome	-	0	-	Cobalamin1_NC_002516|3'(0),P20_yes_NC_002516|3'(0)	5	-	-
Bordetella_pertussis	|	Candidate_99_NC_002929	|	BP1850		hypothetical protein	*	>>>	5	|	1941726	1941817	>>>	91	|	98	>>>	BP1851	probable transcriptional regulator	*	candidate	945	6.1e-37	Z	2	RNA	Bordetella_bronchiseptica_chromosome<>Bordetella_parapertussis_chromosome	-	13	Candidate_127_NC_002929(para),Candidate_13_NC_002929(para),Candidate_28_NC_002929(para),Candidate_119_NC_002929(para),Candidate_25_NC_002929(para),Candidate_29_NC_002929(para),Candidate_18_NC_002929(para),Candidate_37_NC_002929(para),Candidate_102_NC_002929(para),Candidate_43_NC_002929(para),Candidate_44_NC_002929(para),Candidate_100_NC_002929(para),Candidate_31_NC_002929(para)	Cobalamin1_NC_002516|3'(0)	-	RS	-
Bordetella_pertussis	|	Candidate_103_NC_002929	|	trRNA		trRNA	*	>>>	1	|	2033337	2033427	>>>	90	|	156	<<<	BP1931	probable NADH-dependent flavin oxidoreductase	*	candidate	673	1.6e-24	Z	2	RNA	Bordetella_bronchiseptica_chromosome<>Bordetella_parapertussis_chromosome	-	0	Candidate_29_NC_002929(anti)	P11_yes_NC_002516|3'(0)	-	-	-E.coli_sig70_2(7.49|-182)E.coli_sig70_3(10.66|-182)
Bordetella_pertussis	|	Candidate_123_NC_002929	|	BP2189		ATP phosphoribosyltransferase regulatory	*	<<<	11	|	2311156	2311327	<<<	171	|	0	<<<	BP2190	putative inner membrane-anchored protein	*	candidate	906	6.1e-35	F	2	RNA	Bordetella_bronchiseptica_chromosome<>Bordetella_parapertussis_chromosome	-	0	-	Cobalamin1_NC_002516|3'(0)	5	-	-
Bordetella_pertussis	|	Candidate_124_NC_002929	|	BP2189		ATP phosphoribosyltransferase regulatory	*	<<<	51	|	2311196	2311327	<<<	131	|	0	<<<	BP2190	putative inner membrane-anchored protein	*	candidate	906	6.1e-35	Y	2	RNA	Bordetella_bronchiseptica_chromosome<>Bordetella_parapertussis_chromosome	-	0	-	Cobalamin1_NC_002516|3'(0)	-	-	-
Bordetella_pertussis	|	Candidate_125_NC_002929	|	BP2204		putative outer membrane (scaffolding) protein	*	<<<	9	|	2328164	2328223	>>>	59	|	690	>>>	BP2206	putative two component sensor kinase	*	candidate	638	1.7e-23	X	3	-	Bordetella_bronchiseptica_chromosome<>Bordetella_parapertussis_chromosome<>Burkholderia_cenocepacia_AU_1054_chromosome_1	-	0	-	P20_yes_NC_002516|3'(0),P15_yes_NC_002516|3'(0),Cobalamin1_NC_002516|3'(0)	-	-	-
Bordetella_pertussis	|	Candidate_129_NC_002929	|	BP2338		putative transport protein	*	<<<	12	|	2478339	2478453	<<<	114	|	0	<<<	BP2339	ribose-5-phosphate isomerase A	*	candidate	635	1.5e-22	F	2	-	Bordetella_bronchiseptica_chromosome<>Bordetella_parapertussis_chromosome	-	0	-	SRP_bact_NC_002516|UD(5'(1-1)|3'(1-1))	5	-	-E.coli_sig70_2(7.79|-61)
Bordetella_pertussis	|	Candidate_155_NC_002929	|	BP2908		3-deoxy-7-phosphoheptulonate synthase	*	<<<	39	|	3099590	3099806	<<<	216	|	0	<<<	BP2909	hypothetical protein	*	candidate	1244	2.3e-50	Z	2	RNA	Bordetella_bronchiseptica_chromosome<>Bordetella_parapertussis_chromosome	-	0	Candidate_156_NC_002929(anti)	P15_yes_NC_002516|3'(0)	-	-	-
Bordetella_pertussis	|	Candidate_157_NC_002929	|	BP2908		3-deoxy-7-phosphoheptulonate synthase	*	<<<	192	|	3099743	3099806	<<<	63	|	0	<<<	BP2909	hypothetical protein	*	candidate	1244	2.3e-50	Z	2	-	Bordetella_bronchiseptica_chromosome<>Bordetella_parapertussis_chromosome	-	1	Candidate_156_NC_002929(opp)	P15_yes_NC_002516|3'(0)	3	-	-
Bordetella_pertussis	|	Candidate_161_NC_002929	|	BP3061		5-formyltetrahydrofolate cyclo-ligase family	*	>>>	151	|	3263690	3263815	<<<	125	|	0	>>>	BP3062	putative integral membrane transport protein	*	candidate	1253	8.5e-51	F	2	-	Bordetella_bronchiseptica_chromosome<>Bordetella_parapertussis_chromosome	-	0	-	6S_NC_002516|3'(0)	-	-	-
Bordetella_pertussis	|	Candidate_162_NC_002929	|	BP3083		putative regulatory protein	*	>>>	1	|	3285815	3286035	>>>	220	|	54	>>>	BP3084	hypothetical protein	*	candidate	1326	4.3e-54	F	2	-	Bordetella_bronchiseptica_chromosome<>Bordetella_parapertussis_chromosome	-	0	-	Cobalamin3_NC_002516|3'(0)	5	-	-
Bordetella_pertussis	|	Candidate_170_NC_002929	|	BP3264		anthranilate synthase component I	*	<<<	45	|	3483007	3483224	<<<	217	|	0	<<<	BP3265	putative phosphoglycolate phosphatase	*	candidate	1057	7.8e-42	F	2	RNA	Bordetella_bronchiseptica_chromosome<>Bordetella_parapertussis_chromosome	-	0	-	Cobalamin2_NC_002516|3'(0)	-	-	-
Bordetella_pertussis	|	Candidate_183_NC_002929	|	BP3577		ABC transporter ATP-binding protein	*	<<<	1	|	3791754	3792027	>>>	273	|	-17	<<<	BP3578	endonuclease III	*	candidate	1262	3.6e-51	F	2	-	Bordetella_bronchiseptica_chromosome<>Bordetella_parapertussis_chromosome	-	0	-	yybP1ykoY_NC_002516|UD(5'(0-1)|3'(1-1))	-	-	-
Bordetella_pertussis	|	Candidate_197_NC_002929	|	BP3752		hypothetical protein	*	>>>	1	|	3961878	3962033	>>>	155	|	187	>>>	BP3753	glutamate synthase [NADPH] large chain	*	candidate	1657	3.9e-69	F	2	RNA	Bordetella_bronchiseptica_chromosome<>Bordetella_parapertussis_chromosome	-	0	-	THI_NC_002516|3'(0),P20_yes_NC_002516|3'(0),Cobalamin2_NC_002516|3'(0),Cobalamin3_NC_002516|3'(0)	-	-	-
Bordetella_pertussis	|	Candidate_198_NC_002929	|	BP3833		putative permease protein	*	>>>	157	|	4041724	4041777	<<<	53	|	0	>>>	BP3834	hypothetical protein	*	candidate	1055	9.8e-42	F	2	RNA	Bordetella_bronchiseptica_chromosome<>Bordetella_parapertussis_chromosome	-	0	-	Cobalamin4_NC_002516|3'(0),P16_yes_NC_002516|3'(0)	-	-	-
Bordetella_pertussis	|	Candidate_201_NC_002929	|	BP0451		bifunctional	*	<<<	114	|	456891	456971	<<<	80	|	0	>>>	BP0452	hypothetical protein	*	candidate	957	2.8e-37	F	1	-	Bordetella_bronchiseptica_chromosome	-	0	-	Cobalamin4_NC_002516|3'(0)	-	-	-
Bordetella_pertussis	|	Candidate_204_NC_002929	|	BP0527		entericidin A anti-toxin precursor	*	>>>	1	|	531593	531716	>>>	123	|	501	>>>	BP0529	autotransporter	*	candidate	2140	4.6e-91	F	2	-	Bordetella_bronchiseptica_chromosome<>Bordetella_parapertussis_chromosome	-	0	-	P34_yes_NC_002516|3'(0),P20_yes_NC_002516|3'(0),Cobalamin4_NC_002516|3'(0),Cobalamin2_NC_002516|3'(0),P11_yes_NC_002516|3'(0),P26_yes_NC_002516|3'(0),Cobalamin1_NC_002516|3'(0),THI_NC_002516|3'(0)	-	-	-
Bordetella_pertussis	|	Candidate_205_NC_002929	|	BP0530		hypothetical protein	*	>>>	3	|	539577	539688	>>>	111	|	157	>>>	BP0531	hypothetical protein	*	candidate	1263	2.7e-51	Z	2	RNA	Bordetella_bronchiseptica_chromosome<>Bordetella_parapertussis_chromosome	-	17	Candidate_206_NC_002929(opp),Candidate_102_NC_002929(para),Candidate_13_NC_002929(para),Candidate_195_NC_002929(para),Candidate_196_NC_002929(para),Candidate_29_NC_002929(para),Candidate_28_NC_002929(para),Candidate_18_NC_002929(para),Candidate_100_NC_002929(para),Candidate_25_NC_002929(para),Candidate_12_NC_002929(para),Candidate_33_NC_002929(para),Candidate_43_NC_002929(para),Candidate_44_NC_00…	Cobalamin1_NC_002516|UD(5'(1-1)|3'(1-0))	-	-	-
Bordetella_pertussis	|	Candidate_207_NC_002929	|	BP0544		4-oxalocrotonate tautomerase	*	>>>	1	|	553273	553376	>>>	103	|	1	>>>	BP0545	hypothetical protein	*	candidate	494	4.2e-16	F	1	RNA	Bordetella_bronchiseptica_chromosome	-	0	-	Cobalamin1_NC_002516|UD(5'(1-0)|3'(1-0))	5	-	-
Bordetella_pertussis	|	Candidate_211_NC_002929	|	BP0758		cyclolysin-activating lysine-acyltransferase	*	<<<	31	|	775781	775845	>>>	64	|	382	>>>	BP0760	bifunctional hemolysin-adenylate cyclase	*	candidate	1684	2.3e-70	F	1	-	Bordetella_bronchiseptica_chromosome	-	1	Candidate_212_NC_002929(tandem)	Cobalamin1_NC_002516|3'(0),P11_yes_NC_002516|3'(0)	-	-	-
Bordetella_pertussis	|	Candidate_212_NC_002929	|	BP0758		cyclolysin-activating lysine-acyltransferase	*	<<<	58	|	775808	775907	>>>	99	|	320	>>>	BP0760	bifunctional hemolysin-adenylate cyclase	*	candidate	1558	1.2e-64	F	2	-	Bordetella_bronchiseptica_chromosome<>Bordetella_parapertussis_chromosome	-	1	Candidate_211_NC_002929(tandem)	Cobalamin1_NC_002516|3'(0),P11_yes_NC_002516|3'(0)	-	-	-
Bordetella_pertussis	|	Candidate_214_NC_002929	|	BP0793		putative lipoprotein	*	<<<	1	|	816002	816239	>>>	237	|	54	>>>	BP0794	30S ribosomal protein S15	*	candidate	1456	5.4e-60	F	2	RNA	Bordetella_bronchiseptica_chromosome<>Bordetella_parapertussis_chromosome	-	0	-	S15_NC_000913|3'(0)	5	-	-
Bordetella_pertussis	|	Candidate_221_NC_002929	|	BP0100		probable ATP-binding component of ABC	*	>>>	74	|	98254	98580	>>>	326	|	531	>>>	BP0101A	hypothetical protein	*	candidate	527	9.4e-17	F	1	RNA	Burkholderia_mallei_ATCC_23344_chromosome_2	-	1	Candidate_144_NC_002929(para)	Cobalamin1_NC_002516|UD(5'(1-0)|3'(0-0)),Cobalamin3_NC_002516|UD(5'(0-0)|3'(0-1))	-	-	-
Bordetella_pertussis	|	SRP_bact_NC_002929	|	BP1548		putative nuclease/helicase	*	>>>	101	|	1626733	1627191	>>>	458	|	242	>>>	BP1549	DNA polymerase III subunits gamma and tau	*	SRP_bact	2490	4.5e-107	T	2	RNA	Bordetella_bronchiseptica_chromosome<>Bordetella_parapertussis_chromosome	-	5	Candidate_127_NC_002929(para),Candidate_18_NC_002929(para),Candidate_1_NC_002929(para),Candidate_200_NC_002929(para),Candidate_102_NC_002929(para)	Cobalamin1_NC_002516|UD(5'(1-1)|3'(1-0)),SRP_bact_NC_002516|UD(5'(0-1)|3'(1-1)),Cobalamin3_NC_002516|UD(5'(0-0)|3'(0-1)),SRP_bact_NC_003047|3'(0),SRP_bact_NC_000964|3'(0),P36_yes_NC_002516|3'(0),Cobalamin4_NC_002516|3'(0)	-	-	-
Bradyrhizobium_BTAi1	|	Candidate_15_NC_009485	|	BBta_6559		Chemotaxis protein cheA	*	<<<	123	|	6846201	6846313	<<<	112	|	12	<<<	BBta_6560	hypothetical protein	*	candidate	744	9.8e-28	R	1	RNA	Bradyrhizobium_ORS278_chromosome	-	0	-	P26_yes_NC_002516|3'(0),THI_NC_002516|3'(0),P20_yes_NC_002516|3'(0)	-	-	-
Bradyrhizobium_BTAi1	|	Candidate_18_NC_009485	|	BBta_3626		putative sigma-54-dependent transcriptional	*	<<<	152	|	3793748	3793930	<<<	182	|	3	>>>	BBta_3627	putative alcohol dehydrogenase	*	candidate	1035	5.1e-41	R	1	-	Bradyrhizobium_ORS278_chromosome	-	0	-	P20_yes_NC_002516|3'(0)	-	-	-
Bradyrhizobium_BTAi1	|	Candidate_20_NC_009485	|	BBta_1644		Putative Thiamine pyrophosphate-requiring	*	>>>	764	|	1721943	1722010	<<<	67	|	0	>>>	BBta_1646	Putative metallo-dependent peptidase	*	candidate	491	3.1e-16	R	1	-	Bradyrhizobium_ORS278_chromosome	-	1	Candidate_35_NC_009485(para)	Cobalamin2_NC_002516|3'(0)	-	-	-
Bradyrhizobium_BTAi1	|	Candidate_25_NC_009485	|	BBta_0060		30S ribosomal subunit protein S15	*	>>>	74	|	63501	63741	>>>	240	|	47	>>>	BBta_0062	Polyribonucleotide nucleotidyltransferase	*	candidate	549	3.2e-19	T	2	RNA	Bradyrhizobium_japonicum_chromosome<>Bradyrhizobium_ORS278_chromosome	-	0	-	P36_yes_NC_002516|3'(0)	5	-	-
Bradyrhizobium_BTAi1	|	Candidate_37_NC_009485	|	BBta_2318		putative chromosome segregation SMC protein	*	<<<	187	|	2400874	2400928	<<<	54	|	12	<<<	BBta_2319	putative exported protein of unknown function	*	candidate	769	7e-29	B	1	-	Bradyrhizobium_ORS278_chromosome	-	1	Candidate_92_NC_009485(opp)	Cobalamin2_NC_002516|3'(0),P20_yes_NC_002516|3'(0),P15_yes_NC_002516|3'(0),P11_yes_NC_002516|3'(0),P30_yes_NC_002516|3'(0)	3	-	-
Bradyrhizobium_BTAi1	|	Candidate_55_NC_009485	|	BBta_4542		Putative ABC transporter (permease protein)	*	>>>	8	|	4762133	4762352	>>>	219	|	33	<<<	BBta_4543	putative S-methyl-5-thioribose kinase	*	candidate	112	4e-16	T	1	RNA	Bradyrhizobium_ORS278_chromosome	-	18	Candidate_54_NC_009485(anti),Candidate_44_NC_009485(para),Candidate_45_NC_009485(para),Candidate_65_NC_009485(para),Candidate_60_NC_009485(para),Candidate_61_NC_009485(para),Candidate_62_NC_009485(para),Candidate_51_NC_009485(para),Candidate_52_NC_009485(para),Candidate_40_NC_009485(para),Candidate_41_NC_009485(para),Candidate_67_NC_009485(para),Candidate_215_NC_009485(para),Candidate_143_NC_0094…	S_box4_NC_000964|3'(0)	-	-	-
Bradyrhizobium_BTAi1	|	Candidate_60_NC_009485	|	BBta_5400		putative membrane protein of unknown function	*	>>>	1	|	5622606	5622692	>>>	86	|	210	<<<	BBta_5401	Phosphoribosylformylglycinamidine synthase II	*	candidate	488	3.6e-16	T	1	RNA	Bradyrhizobium_ORS278_chromosome	-	19	Candidate_61_NC_009485(anti),Candidate_67_NC_009485(para),Candidate_215_NC_009485(para),Candidate_44_NC_009485(para),Candidate_45_NC_009485(para),Candidate_65_NC_009485(para),Candidate_54_NC_009485(para),Candidate_55_NC_009485(para),Candidate_51_NC_009485(para),Candidate_52_NC_009485(para),Candidate_40_NC_009485(para),Candidate_41_NC_009485(para),Candidate_29_NC_009485(para),Candidate_177_NC_0094…	P20_yes_NC_002516|3'(0)	-	-	-
Bradyrhizobium_BTAi1	|	Candidate_62_NC_009485	|	BBta_5400		putative membrane protein of unknown function	*	>>>	1	|	5622606	5622885	>>>	279	|	17	<<<	BBta_5401	Phosphoribosylformylglycinamidine synthase II	*	candidate	488	3.6e-16	T	1	RNA	Bradyrhizobium_ORS278_chromosome	-	21	Candidate_61_NC_009485(anti),Candidate_67_NC_009485(para),Candidate_215_NC_009485(para),Candidate_38_NC_009485(para),Candidate_81_NC_009485(para),Candidate_44_NC_009485(para),Candidate_45_NC_009485(para),Candidate_65_NC_009485(para),Candidate_54_NC_009485(para),Candidate_55_NC_009485(para),Candidate_51_NC_009485(para),Candidate_52_NC_009485(para),Candidate_40_NC_009485(para),Candidate_41_NC_00948…	P20_yes_NC_002516|3'(0)	-	-	-
Bradyrhizobium_BTAi1	|	Candidate_70_NC_009485	|	BBta_1314		Putative TonB-dependent receptor protein	*	<<<	177	|	1402653	1402824	<<<	171	|	103	<<<	BBta_1315	Cyanuric acid amidohydrolase	*	candidate	486	2.6e-16	F	1	-	Bradyrhizobium_ORS278_chromosome	-	0	-	Cobalamin2_NC_002516|3'(0)	-	-	-
Bradyrhizobium_BTAi1	|	Candidate_80_NC_009485	|	BBta_1702		Putative methyltransferase	*	>>>	1	|	1775261	1775348	>>>	87	|	132	<<<	BBta_1703	DNA mismatch repair protein MutL	*	candidate	775	4.1e-29	F	1	-	Bradyrhizobium_ORS278_chromosome	-	5	Candidate_215_NC_009485(para),Candidate_81_NC_009485(para),Candidate_38_NC_009485(para),Candidate_26_NC_009485(para),Candidate_73_NC_009485(para)	P18_yes_NC_002516|UD(5'(1-0)|3'(0-1))	-	-	-
Bradyrhizobium_BTAi1	|	Candidate_87_NC_009485	|	BBta_0191		Chaperone protein dnaK	*	>>>	2	|	199042	199116	>>>	74	|	65	>>>	BBta_0192	Chaperone protein dnaJ, heat shock protein	*	candidate	590	1.5e-20	Y	1	RNA	Bradyrhizobium_ORS278_chromosome	-	0	-	tpke11_NC_000913|UD(5'(0-0)|3'(0-0))	5	-	-
Bradyrhizobium_BTAi1	|	Candidate_94_NC_009485	|	BBta_0237		putative exported protein of unknown function	*	>>>	22	|	246134	246348	<<<	214	|	5	<<<	BBta_0238	argininosuccinate synthetase	*	candidate	478	4.3e-16	Z	1	RNA	Bradyrhizobium_ORS278_chromosome	-	3	Candidate_215_NC_009485(para),Candidate_73_NC_009485(para),Candidate_81_NC_009485(para)	P34_yes_NC_002516|3'(0),Cobalamin4_NC_002516|3'(0)	-	-	-
Bradyrhizobium_BTAi1	|	Candidate_96_NC_009485	|	BBta_2498		putative acyl-CoA dehydrogenase	*	<<<	201	|	2583107	2583193	<<<	86	|	0	>>>	trRNA	trRNA	*	candidate	936	1.7e-36	F	1	-	Bradyrhizobium_ORS278_chromosome	-	0	-	Cobalamin4_NC_002516|3'(0)	-	-	-
Bradyrhizobium_BTAi1	|	Candidate_119_NC_009485	|	trRNA		trRNA	*	<<<	554	|	3927360	3927677	<<<	317	|	34	>>>	BBta_3747	putative exported protein of unknown function	*	candidate	2200	6e-94	F	1	RNA	Bradyrhizobium_ORS278_chromosome	-	0	-	P20_yes_NC_002516|3'(0)	-	-	-
Bradyrhizobium_BTAi1	|	Candidate_122_NC_009485	|	BBta_3863		hypothetical protein	*	<<<	132	|	4047885	4048006	<<<	121	|	0	>>>	BBta_3864	Aspartyl-tRNA synthetase / asparaginyl-tRNA	*	candidate	680	6.9e-25	F	1	-	Bradyrhizobium_ORS278_chromosome	-	1	Candidate_121_NC_009485(opp)	P11_yes_NC_002516|3'(0)	-	-	-
Bradyrhizobium_BTAi1	|	Candidate_126_NC_009485	|	BBta_4018		3-deoxy-7-phosphoheptulonate synthase	*	<<<	40	|	4223412	4223589	<<<	177	|	40	<<<	BBta_4019	putative membrane protein of unknown function	*	candidate	723	8.8e-27	Z	2	-	Bradyrhizobium_japonicum_chromosome<>Bradyrhizobium_ORS278_chromosome	-	0	-	P15_yes_NC_002516|3'(0)	-	-	-
Bradyrhizobium_BTAi1	|	Candidate_130_NC_009485	|	BBta_4134		putative lactam utilization protein	*	>>>	14	|	4340957	4341265	>>>	308	|	28	<<<	BBta_4136	putative sulfite reductase (NADPH)	*	candidate	771	4.1e-29	Y	1	RNA	Bradyrhizobium_ORS278_chromosome	-	0	-	P26_yes_NC_002516|3'(0)	-	-	-
Bradyrhizobium_BTAi1	|	Candidate_132_NC_009485	|	BBta_4172		Putative cyclic beta-1-3, beta-1-6-glucan	*	>>>	25	|	4383882	4384035	>>>	153	|	173	>>>	BBta_4173	Putative beta-(1-3)-glucosyl transferase,	*	candidate	686	2.9e-25	F	1	-	Bradyrhizobium_ORS278_chromosome	-	0	-	P20_yes_NC_002516|3'(0),Cobalamin1_NC_002516|3'(0)	-	-	-E.coli_sig70_1(7.15|-67)
Bradyrhizobium_BTAi1	|	Candidate_137_NC_009485	|	BBta_4517		30S ribosomal protein S2	*	<<<	37	|	4732376	4732492	<<<	116	|	0	<<<	BBta_4518	hypothetical protein	*	candidate	720	1.8e-26	X	1	-	Bradyrhizobium_ORS278_chromosome	-	0	-	tff_t44_ECK0167_NC_000913|3'(0)	-	-	-
Bradyrhizobium_BTAi1	|	Candidate_140_NC_009485	|	BBta_4579		hypothetical protein	*	<<<	147	|	4800927	4801305	<<<	378	|	0	>>>	BBta_4580	Nitrogen regulatory protein P-II	*	candidate	1153	1.4e-46	X	1	RNA	Bradyrhizobium_ORS278_chromosome	-	0	-	P20_yes_NC_002516|3'(0),SRP_bact_NC_003047|3'(0)	-	-	-
Bradyrhizobium_BTAi1	|	Candidate_141_NC_009485	|	BBta_4580		Nitrogen regulatory protein P-II	*	>>>	11	|	4801656	4801769	>>>	113	|	102	>>>	BBta_4581	Glutamine synthetase I	*	candidate	771	6.1e-29	F	1	RNA	Bradyrhizobium_ORS278_chromosome	-	0	-	P1_yes_NC_002516|3'(0)	-	-	-
Bradyrhizobium_BTAi1	|	Candidate_144_NC_009485	|	BBta_0489		putative membrane protein of unknown function	*	<<<	328	|	484611	484698	<<<	87	|	86	>>>	BBta_0490	putative SEC-C motif domain protein	*	candidate	1424	9e-59	F	1	RNA	Bradyrhizobium_ORS278_chromosome	-	0	-	Cobalamin1_NC_002516|3'(0)	-	-	-
Bradyrhizobium_BTAi1	|	Candidate_153_NC_009485	|	BBta_5081		RNA polymerase, beta subunit	*	<<<	151	|	5308910	5309124	<<<	214	|	178	<<<	BBta_5082	50S ribosomal subunit protein L7/L12	*	candidate	619	2.1e-22	Y	9	RNA	Bradyrhizobium_japonicum_chromosome<>Rhodopseudomonas_palustris_CGA009_chromosome<>Nitrobacter_winogradskyi_Nb-255_chromosome<>Rhodopseudomonas_palustris_HaA2_chromosome<>Rhodopseudomonas_palustris_BisB18_chromosome<>Rhodopseudomonas_palustris_BisB5_chromosome<>Nitrobacter_hamburgensis_X14_chromosome<>Rhodopseudomonas_palustris_BisA53_chromosome<>Bradyrhizobium_ORS278_chromosome	-	0	-	P26_yes_NC_002516|UD(5'(1-1)|3'(0-0))	-	-	-
Bradyrhizobium_BTAi1	|	Candidate_162_NC_009485	|	BBta_5497		Putative flagellar basal-body rod protein flgB	*	<<<	2	|	5713751	5713868	>>>	117	|	235	>>>	BBta_5498	putative exported protein of unknown function	*	candidate	1001	1.5e-39	X	1	RNA	Bradyrhizobium_ORS278_chromosome	-	0	Candidate_161_NC_009485(anti)	Cobalamin4_NC_002516|3'(0)	-	-	-
Bradyrhizobium_BTAi1	|	Candidate_177_NC_009485	|	BBta_6087		Acetolactate synthase large subunit	*	<<<	96	|	6315408	6315654	<<<	246	|	91	<<<	BBta_6088	tRNA delta(2)-isopentenylpyrophosphate	*	candidate	1043	2.2e-41	Z	5	RNA	Bradyrhizobium_japonicum_chromosome<>Rhodopseudomonas_palustris_CGA009_chromosome<>Rhodopseudomonas_palustris_HaA2_chromosome<>Rhodopseudomonas_palustris_BisB5_chromosome<>Bradyrhizobium_ORS278_chromosome	-	8	Candidate_44_NC_009485(para),Candidate_45_NC_009485(para),Candidate_51_NC_009485(para),Candidate_52_NC_009485(para),Candidate_60_NC_009485(para),Candidate_61_NC_009485(para),Candidate_62_NC_009485(para),Candidate_143_NC_009485(para)	T1box11_NC_000964|3'(0)	-	RS	-E.coli_sig70_1(8.11|-147)
Bradyrhizobium_BTAi1	|	Candidate_178_NC_009485	|	BBta_6094		Putative Serine protease do-like precursor	*	<<<	116	|	6323717	6323781	<<<	64	|	64	<<<	BBta_6095	hypothetical protein	*	candidate	643	3.7e-23	F	1	RNA	Bradyrhizobium_ORS278_chromosome	-	0	-	P11_yes_NC_002516|3'(0),Cobalamin1_NC_002516|3'(0),P20_yes_NC_002516|3'(0)	-	-	-
Bradyrhizobium_BTAi1	|	Candidate_213_NC_009485	|	BBta_7543		transcriptional regulator	*	<<<	23	|	7926883	7926981	>>>	98	|	373	<<<	BBta_7544	ferredoxin II	*	candidate	645	9.8e-24	X	2	RNA	Rhodopseudomonas_palustris_CGA009_chromosome<>Bradyrhizobium_ORS278_chromosome	-	0	-	PrrB_RsmZ_NC_002516|3'(0),RsmZ_NC_002516|3'(0)	-	-	-
Bradyrhizobium_japonicum	|	Candidate_2_NC_004463	|	bll0779		polyribonucleotide nucleotidyltransferase	*	<<<	50	|	837272	837523	<<<	251	|	160	<<<	bsl0780	30S ribosomal protein S15	*	candidate	549	4.1e-19	T	2	RNA	Bradyrhizobium_ORS278_chromosome<>Bradyrhizobium_BTAi1_chromosome	-	0	-	S15_NC_002516|UD(5'(1-0)|3'(0-1))	-	-	-
Bradyrhizobium_japonicum	|	Candidate_8_NC_004463	|	bll4861		30S ribosomal protein S2	*	<<<	39	|	5386409	5386521	<<<	112	|	80	<<<	bll4862	hypothetical protein	*	candidate	486	6.7e-16	B	1	RNA	Bradyrhizobium_ORS278_chromosome	-	0	-	tff_t44_ECK0167_NC_000913|3'(0)	-	-	-
Bradyrhizobium_japonicum	|	Candidate_20_NC_004463	|	bll4389		3-deoxy-7-phosphoheptulonate synthase	*	<<<	35	|	4854050	4854225	<<<	175	|	21	<<<	bll4390	hypothetical protein	*	candidate	723	7.9e-27	Z	2	RNA	Bradyrhizobium_ORS278_chromosome<>Bradyrhizobium_BTAi1_chromosome	-	0	-	P15_yes_NC_002516|3'(0),Cobalamin4_NC_002516|3'(0)	-	-	-
Bradyrhizobium_japonicum	|	Candidate_30_NC_004463	|	bll5155		hypothetical protein	*	<<<	332	|	5712290	5712398	>>>	108	|	-52	>>>	blr5156	putative D-alanyl-D-alanine carboxypeptidase	*	candidate	191	7.6e-16	F	2	-	Nitrobacter_hamburgensis_X14_chromosome<>Bradyrhizobium_BTAi1_chromosome	-	0	-	P20_yes_NC_002516|3'(0),P15_yes_NC_002516|3'(0)	5	-	-
Bradyrhizobium_japonicum	|	Candidate_31_NC_004463	|	bll5410		DNA-directed RNA polymerase beta subunit	*	<<<	152	|	5956049	5956262	<<<	213	|	117	<<<	bll5411	50S ribosomal protein L7/L12	*	candidate	600	1.5e-21	Y	9	RNA	Rhodopseudomonas_palustris_CGA009_chromosome<>Nitrobacter_winogradskyi_Nb-255_chromosome<>Rhodopseudomonas_palustris_HaA2_chromosome<>Rhodopseudomonas_palustris_BisB18_chromosome<>Rhodopseudomonas_palustris_BisB5_chromosome<>Nitrobacter_hamburgensis_X14_chromosome<>Rhodopseudomonas_palustris_BisA53_chromosome<>Bradyrhizobium_ORS278_chromosome<>Bradyrhizobium_BTAi1_chromosome	-	0	Candidate_32_NC_004463(anti)	P26_yes_NC_002516|UD(5'(1-1)|3'(1-0)),P11_yes_NC_002516|3'(0)	-	-	-
Bradyrhizobium_japonicum	|	Candidate_36_NC_004463	|	bll5914		carbon monoxide dehydrogenase large chain	*	<<<	548	|	6503640	6503819	<<<	179	|	127	>>>	blr5915	hypothetical protein	*	candidate	701	3.8e-26	F	2	RNA	Bradyrhizobium_ORS278_chromosome<>Bradyrhizobium_BTAi1_chromosome	-	0	-	SRP_bact_NC_003047|3'(0),Cobalamin2_NC_002516|3'(0)	-	-	-
Bradyrhizobium_japonicum	|	Candidate_38_NC_004463	|	bll6503		acetolactate synthase III large subunit	*	<<<	57	|	7161806	7162054	<<<	248	|	127	<<<	bll6504	tRNA delta(2)-isopentenylpyrophosphate	*	candidate	718	1e-26	Z	7	RNA	Rhodopseudomonas_palustris_CGA009_chromosome<>Rhodopseudomonas_palustris_HaA2_chromosome<>Rhodopseudomonas_palustris_BisB18_chromosome<>Rhodopseudomonas_palustris_BisB5_chromosome<>Rhodopseudomonas_palustris_BisA53_chromosome<>Bradyrhizobium_ORS278_chromosome<>Bradyrhizobium_BTAi1_chromosome	-	0	-	T1box11_NC_000964|3'(0)	-	-	-E.coli_sig70_1(8.11|-150)
Bradyrhizobium_japonicum	|	Candidate_41_NC_004463	|	bll7399		hypothetical protein	*	<<<	7	|	8136702	8136876	>>>	174	|	92	<<<	bll7400	acetyl-CoA acetyltransferase	*	candidate	598	8.8e-22	F	3	RNA	Mesorhizobium_loti_chromosome<>Burkholderia_xenovorans_LB400_chromosome_3<>Rhizobium_leguminosarum_bv_viciae_3841_chromosome	-	0	-	P11_yes_NC_002516|3'(0)	-	-	-
Bradyrhizobium_ORS278	|	Candidate_13_NC_009445	|	BRADO4353		putative alcohol dehydrogenase	*	<<<	5	|	4544733	4544912	>>>	179	|	138	>>>	BRADO4355	putative sigma-54-dependent transcriptional	*	candidate	1035	4.9e-41	R	1	RNA	Bradyrhizobium_BTAi1_chromosome	-	0	-	P36_yes_NC_002516|3'(0),SRP_bact_NC_003047|3'(0)	-	-	-
Bradyrhizobium_ORS278	|	Candidate_31_NC_009445	|	BRADO0056		30S ribosomal subunit protein S15	*	>>>	44	|	64748	65014	>>>	266	|	45	>>>	BRADO0057	Polyribonucleotide nucleotidyltransferase	*	candidate	552	2.3e-19	T	2	RNA	Bradyrhizobium_japonicum_chromosome<>Bradyrhizobium_BTAi1_chromosome	-	0	-	S15_NC_002516|UD(5'(1-0)|3'(0-1))	5	-	-
Bradyrhizobium_ORS278	|	Candidate_32_NC_009445	|	BRADO0147		copper-transporting P-type ATPase	*	>>>	38	|	162176	162347	<<<	171	|	0	>>>	BRADO0148	hypothetical protein	*	candidate	637	7.6e-23	T	1	RNA	Bradyrhizobium_BTAi1_chromosome	-	13	Candidate_57_NC_009445(para),Candidate_66_NC_009445(para),Candidate_72_NC_009445(para),Candidate_73_NC_009445(para),Candidate_142_NC_009445(para),Candidate_55_NC_009445(para),Candidate_56_NC_009445(para),Candidate_120_NC_009445(para),Candidate_9_NC_009445(para),Candidate_69_NC_009445(para),Candidate_70_NC_009445(para),Candidate_49_NC_009445(para),Candidate_50_NC_009445(para)	P34_yes_NC_002516|3'(0)	-	-	-
Bradyrhizobium_ORS278	|	Candidate_35_NC_009445	|	BRADO0573		Phosphoenolpyruvate-protein phosphotransferase	*	<<<	197	|	590966	591069	<<<	103	|	0	<<<	BRADO0574	aspartokinase	*	candidate	1220	2.4e-49	T	1	-	Bradyrhizobium_BTAi1_chromosome	-	0	-	P20_yes_NC_002516|3'(0),Cobalamin1_NC_002516|3'(0),P11_yes_NC_002516|3'(0)	-	-	-
Bradyrhizobium_ORS278	|	Candidate_66_NC_009445	|	BRADO5712		thiamine phosphate pyrophosphorylase (thiamin	*	>>>	1	|	5915076	5915152	>>>	76	|	60	>>>	BRADO5713	thiamine biosynthesis protein ThiC	*	candidate	483	9.9e-16	T	1	RNA	Bradyrhizobium_BTAi1_chromosome	-	14	Candidate_57_NC_009445(para),Candidate_72_NC_009445(para),Candidate_73_NC_009445(para),Candidate_32_NC_009445(para),Candidate_69_NC_009445(para),Candidate_70_NC_009445(para),Candidate_142_NC_009445(para),Candidate_55_NC_009445(para),Candidate_56_NC_009445(para),Candidate_9_NC_009445(para),Candidate_49_NC_009445(para),Candidate_50_NC_009445(para),Candidate_64_NC_009445(para),Candidate_43_NC_009445…	THI_NC_002516|3'(0),THI2_NC_000913|3'(0),THI1_NC_003112|3'(0),THI1_NC_002505|3'(0),THI1_NC_000964|3'(0)	5	RS	-
Bradyrhizobium_ORS278	|	Candidate_82_NC_009445	|	BRADO1113		putative cyclopropane-fatty-acyl-phospholipid	*	>>>	26	|	1186341	1186508	>>>	167	|	148	>>>	BRADO1114	Putative component of multidrug efflux pump,	*	candidate	769	5e-29	F	1	-	Bradyrhizobium_BTAi1_chromosome	-	0	-	P15_yes_NC_002516|3'(0)	-	-	-
Bradyrhizobium_ORS278	|	Candidate_89_NC_009445	|	BRADO1325		carbamoyl phosphate synthase, large subunit	*	<<<	40	|	1416672	1416795	<<<	123	|	0	<<<	BRADO1326	Putative Permease of the major facilitator	*	candidate	588	1.1e-20	Y	1	RNA	Bradyrhizobium_BTAi1_chromosome	-	0	-	Cobalamin2_NC_002516|3'(0)	-	-	-
Bradyrhizobium_ORS278	|	Candidate_99_NC_009445	|	BRADO0164		Chaperone protein dnaK (Heat shock protein 70)	*	<<<	156	|	178210	178264	<<<	54	|	326	>>>	BRADO0165	conserved hypothetical protein; putative signal	*	candidate	475	4.9e-16	F	7	-	Bradyrhizobium_japonicum_chromosome<>Nitrobacter_winogradskyi_Nb-255_chromosome<>Rhodopseudomonas_palustris_HaA2_chromosome<>Rhodopseudomonas_palustris_BisB5_chromosome<>Nitrobacter_hamburgensis_X14_chromosome<>Rhodopseudomonas_palustris_BisA53_chromosome<>Bradyrhizobium_BTAi1_chromosome	-	1	Candidate_100_NC_009445(tandem)	SurC_NC_000964|3'(0),Cobalamin2_NC_002516|3'(0)	-	-	-
Bradyrhizobium_ORS278	|	Candidate_100_NC_009445	|	BRADO0164		Chaperone protein dnaK (Heat shock protein 70)	*	<<<	250	|	178304	178364	<<<	60	|	226	>>>	BRADO0165	conserved hypothetical protein; putative signal	*	candidate	842	1.7e-32	F	6	-	Bradyrhizobium_japonicum_chromosome<>Nitrobacter_winogradskyi_Nb-255_chromosome<>Rhodopseudomonas_palustris_HaA2_chromosome<>Rhodopseudomonas_palustris_BisB5_chromosome<>Rhodopseudomonas_palustris_BisA53_chromosome<>Bradyrhizobium_BTAi1_chromosome	-	1	Candidate_99_NC_009445(tandem)	SurC_NC_000964|3'(0),Cobalamin2_NC_002516|3'(0)	-	-	-
Bradyrhizobium_ORS278	|	Candidate_106_NC_009445	|	BRADO2392		Conserved hypothetical protein; Putative	*	<<<	1	|	2549869	2550197	>>>	328	|	115	>>>	BRADO2393	putative acetyl-CoA acyltransferase	*	candidate	835	3.8e-32	F	1	-	Bradyrhizobium_BTAi1_chromosome	-	0	-	Cobalamin1_NC_002516|3'(0)	-	-	-
Bradyrhizobium_ORS278	|	Candidate_124_NC_009445	|	BRADO3053		50S ribosomal subunit protein L7/L12	*	>>>	180	|	3251340	3251552	>>>	212	|	152	>>>	BRADO3054	RNA polymerase, beta subunit	*	candidate	496	7.6e-17	Y	9	RNA	Bradyrhizobium_japonicum_chromosome<>Rhodopseudomonas_palustris_CGA009_chromosome<>Nitrobacter_winogradskyi_Nb-255_chromosome<>Rhodopseudomonas_palustris_HaA2_chromosome<>Rhodopseudomonas_palustris_BisB18_chromosome<>Rhodopseudomonas_palustris_BisB5_chromosome<>Nitrobacter_hamburgensis_X14_chromosome<>Rhodopseudomonas_palustris_BisA53_chromosome<>Bradyrhizobium_BTAi1_chromosome	-	0	Candidate_123_NC_009445(anti)	P26_yes_NC_002516|UD(5'(0-0)|3'(0-0)),P20_yes_NC_002516|3'(0)	-	-	-
Bradyrhizobium_ORS278	|	Candidate_140_NC_009445	|	BRADO3590		3-deoxy-7-phosphoheptulonate synthase	*	<<<	40	|	3782978	3783155	<<<	177	|	12	<<<	BRADO3591	hypothetical protein	*	candidate	668	2.7e-24	Z	2	-	Bradyrhizobium_japonicum_chromosome<>Bradyrhizobium_BTAi1_chromosome	-	0	-	P15_yes_NC_002516|3'(0)	-	-	-
Bradyrhizobium_ORS278	|	Candidate_145_NC_009445	|	BRADO3769		DNA helicase, ATP-dependent resolution of	*	<<<	1	|	3938237	3938409	>>>	172	|	77	>>>	BRADO3770	hypothetical protein	*	candidate	618	5.9e-22	X	1	-	Bradyrhizobium_BTAi1_chromosome	-	0	-	P11_yes_NC_002516|UD(5'(0-0)|3'(1-0))	5	-	-
Bradyrhizobium_ORS278	|	Candidate_151_NC_009445	|	BRADO3921		conserved hypothetical protein; putative	*	<<<	270	|	4107434	4107583	<<<	149	|	96	>>>	trRNA	trRNA	*	candidate	557	1.5e-19	F	1	-	Bradyrhizobium_BTAi1_chromosome	-	0	-	Cobalamin1_NC_002516|3'(0),Cobalamin2_NC_002516|3'(0),P11_yes_NC_002516|3'(0),SRP_bact_NC_003047|3'(0)	-	-	-
Bradyrhizobium_ORS278	|	Candidate_152_NC_009445	|	BRADO4140		30S ribosomal protein S2	*	<<<	38	|	4337063	4337178	<<<	115	|	1	<<<	BRADO4141	hypothetical protein	*	candidate	720	1.8e-26	Z	2	-	Bradyrhizobium_japonicum_chromosome<>Bradyrhizobium_BTAi1_chromosome	-	0	-	tff_t44_ECK0167_NC_000913|3'(0)	-	-	-
Bradyrhizobium_ORS278	|	Candidate_154_NC_009445	|	BRADO4197		ATP-dependent Clp protease ATP-binding subunit	*	<<<	4	|	4398657	4398998	>>>	341	|	97	<<<	BRADO4198	ATP-dependent Clp protease proteolytic subunit	*	candidate	538	1.2e-18	F	6	RNA	Bradyrhizobium_japonicum_chromosome<>Rhodopseudomonas_palustris_CGA009_chromosome<>Rhodopseudomonas_palustris_HaA2_chromosome<>Rhodopseudomonas_palustris_BisB18_chromosome<>Rhodopseudomonas_palustris_BisB5_chromosome<>Bradyrhizobium_BTAi1_chromosome	-	0	-	sraA_t15_psrA3_NC_000913|UD(5'(1-0)|3'(0-1))	-	-	-
Bradyrhizobium_ORS278	|	Candidate_156_NC_009445	|	BRADO4229		Putative Polysaccharide biosynthesis, transport	*	<<<	100	|	4431023	4431266	<<<	243	|	0	>>>	BRADO4230	putative glycosyl transferase, group 1	*	candidate	292	2.5e-22	F	1	-	Bradyrhizobium_BTAi1_chromosome	-	0	-	Cobalamin1_NC_002516|3'(0)	-	-	-
Bradyrhizobium_ORS278	|	Candidate_164_NC_009445	|	BRADO4483		hypothetical protein; Trans-splicing factor Raa3	*	<<<	368	|	4684953	4685228	>>>	275	|	96	<<<	BRADO4486	Aspartyl/glutamyl-tRNA(Asn/Gln) amidotransferase	*	candidate	1268	1.3e-51	F	6	RNA	Rhodopseudomonas_palustris_CGA009_chromosome<>Rhodopseudomonas_palustris_HaA2_chromosome<>Rhodopseudomonas_palustris_BisB18_chromosome<>Rhodopseudomonas_palustris_BisB5_chromosome<>Nitrobacter_hamburgensis_X14_chromosome<>Bradyrhizobium_BTAi1_chromosome	-	0	Candidate_163_NC_009445(anti)	P11_yes_NC_002516|3'(0)	-	-	-
Bradyrhizobium_ORS278	|	Candidate_174_NC_009445	|	BRADO0508		putative alkanal monooxygenase (FMN-linked)	*	<<<	2	|	513570	513886	>>>	316	|	140	>>>	BRADO0509	putative polyhydroxy-alkanoate/butyrate(PHA/PHB)	*	candidate	1215	3.1e-49	X	1	-	Bradyrhizobium_BTAi1_chromosome	-	0	-	SRP_bact_NC_003047|3'(0)	-	-	-
Bradyrhizobium_ORS278	|	Candidate_175_NC_009445	|	BRADO0508		putative alkanal monooxygenase (FMN-linked)	*	<<<	2	|	513570	513948	>>>	378	|	78	>>>	BRADO0509	putative polyhydroxy-alkanoate/butyrate(PHA/PHB)	*	candidate	1215	3.1e-49	X	1	RNA	Bradyrhizobium_BTAi1_chromosome	-	0	-	SRP_bact_NC_003047|3'(0)	5	-	-
Bradyrhizobium_ORS278	|	Candidate_178_NC_009445	|	BRADO5029		Putative flagellar basal-body rod protein flgB	*	<<<	2	|	5217786	5217903	>>>	117	|	268	>>>	BRADO5030	conserved hypothetical protein; putative	*	candidate	1001	1.6e-39	X	1	RNA	Bradyrhizobium_BTAi1_chromosome	-	0	-	Cobalamin1_NC_002516|3'(0),P20_yes_NC_002516|3'(0),P32_yes_NC_002516|3'(0)	-	-	-
Bradyrhizobium_ORS278	|	Candidate_199_NC_009445	|	BRADO5564		Acetolactate synthase large subunit (AHAS)	*	<<<	75	|	5751086	5751330	<<<	244	|	13	<<<	BRADO5565	putative Plasmid stability protein stbB	*	candidate	512	1.9e-17	Z	5	RNA	Bradyrhizobium_japonicum_chromosome<>Rhodopseudomonas_palustris_CGA009_chromosome<>Rhodopseudomonas_palustris_HaA2_chromosome<>Rhodopseudomonas_palustris_BisB5_chromosome<>Bradyrhizobium_BTAi1_chromosome	-	0	-	T1box11_NC_000964|3'(0)	-	-	-E.coli_sig70_1(8.11|-147)
Bradyrhizobium_ORS278	|	Candidate_201_NC_009445	|	BRADO5572		Putative Serine protease do-like precursor	*	<<<	117	|	5757991	5758061	<<<	70	|	35	<<<	BRADO5573	hypothetical protein	*	candidate	643	3.4e-23	F	1	RNA	Bradyrhizobium_BTAi1_chromosome	-	0	-	P11_yes_NC_002516|3'(0)	-	-	-
Bradyrhizobium_ORS278	|	Candidate_205_NC_009445	|	BRADO5611		putative amidase	*	<<<	82	|	5800659	5800838	<<<	179	|	0	>>>	BRADO5612	hypothetical protein	*	candidate	483	5.4e-16	F	1	-	Bradyrhizobium_BTAi1_chromosome	-	0	-	P20_yes_NC_002516|3'(0)	-	-	-
Bradyrhizobium_ORS278	|	Candidate_235_NC_009445	|	BRADO0691		Ferredoxin--NADP reductase (=Flavodoxin	*	>>>	1	|	726456	726567	>>>	111	|	97	>>>	BRADO0692	putative AMP-dependent synthetase and ligase	*	candidate	685	5.1e-25	F	1	RNA	Bradyrhizobium_BTAi1_chromosome	-	0	-	Cobalamin1_NC_002516|3'(0)	-	-	-
Brucella_abortus_9-941	|	Candidate_34_NC_006932	|	BruAb1_1168		30S ribosomal protein S2	*	<<<	157	|	1159818	1159883	<<<	65	|	70	<<<	BruAb1_1169	hypothetical protein	*	candidate	1110	3e-44	T	3	RNA	Brucella_melitensis_chromosome_1<>Brucella_suis_1330_chromosome_1<>Brucella_melitensis_biovar_Abortus_chromosome_1	-	0	-	tff_t44_ECK0167_NC_000913|3'(0)	-	-	-
Brucella_abortus_9-941	|	Candidate_37_NC_006932	|	BruAb1_1216		30S ribosomal protein S13	*	<<<	222	|	1207136	1207209	<<<	73	|	12	<<<	BruAb1_1217	adenylate kinase	*	candidate	1196	3e-48	T	5	-	Brucella_melitensis_chromosome_1<>Brucella_suis_1330_chromosome_1<>Brucella_melitensis_biovar_Abortus_chromosome_1<>Brucella_ovis_chromosome_1<>Ochrobactrum_anthropi_ATCC_49188_chromosome_1	-	0	-	Alpha_RBS_NC_000913|UD(5'(1-1)|3'(0-0))	-	-	-
Brucella_abortus_9-941	|	Candidate_39_NC_006932	|	BruAb1_1248		DNA-directed RNA polymerase beta subunit	*	<<<	86	|	1232648	1232768	<<<	120	|	0	<<<	BruAb1_1249	50S ribosomal protein L7/L12	*	candidate	615	4.9e-22	T	5	RNA	Brucella_melitensis_chromosome_1<>Brucella_suis_1330_chromosome_1<>Brucella_melitensis_biovar_Abortus_chromosome_1<>Brucella_ovis_chromosome_1<>Ochrobactrum_anthropi_ATCC_49188_chromosome_1	-	0	-	P26_yes_NC_002516|UD(5'(1-1)|3'(0-0))	-	-	-
Brucella_abortus_9-941	|	Candidate_71_NC_006932	|	BruAb1_2132		transcriptional regulator, Cro/CI family	*	>>>	1	|	2096919	2097092	>>>	173	|	51	>>>	BruAb1_2133	S-adenosylmethionine synthetase	*	candidate	1121	9.5e-45	T	4	-	Brucella_melitensis_chromosome_1<>Brucella_suis_1330_chromosome_1<>Brucella_melitensis_biovar_Abortus_chromosome_1<>Brucella_ovis_chromosome_1	-	0	-	S_box8_NC_000964|3'(0),S_box3_NC_002745|3'(0),S_box5_NC_003210|3'(0)	5	-	-
Brucella_abortus_9-941	|	Candidate_73_NC_006932	|	BruAb1_1057		ATP-dependent RNA helicase, DEAD/DEAH box	*	>>>	22	|	1041504	1041651	<<<	147	|	0	>>>	BruAb1_1058	cysteine synthase	*	candidate	850	2.2e-32	X	4	RNA	Brucella_melitensis_chromosome_1<>Brucella_suis_1330_chromosome_1<>Brucella_melitensis_biovar_Abortus_chromosome_1<>Brucella_ovis_chromosome_1	-	0	-	C0343_NC_000913|3'(0)	-	-	-
Brucella_abortus_9-941	|	Candidate_84_NC_006932	|	BruAb1_1174		HIT family protein	*	>>>	1	|	1164418	1164518	>>>	100	|	4	<<<	BruAb1_1175	ClpA, ATP-dependent Clp protease, ATP-binding	*	candidate	530	1e-17	Z	4	RNA	Brucella_melitensis_chromosome_1<>Brucella_suis_1330_chromosome_1<>Brucella_melitensis_biovar_Abortus_chromosome_1<>Brucella_ovis_chromosome_1	-	0	-	RyfD_NC_000913|3'(0)	-	-	-E.coli_sig70_3(8.33|-75)
Brucella_abortus_9-941	|	Candidate_101_NC_006932	|	BruAb1_1385		acetolactate synthase III large subunit	*	<<<	44	|	1362985	1363187	<<<	202	|	0	<<<	BruAb1_1386	tRNA delta(2)-isopentenylpyrophosphate	*	candidate	1005	1.2e-39	Z	5	-	Brucella_melitensis_chromosome_1<>Brucella_suis_1330_chromosome_1<>Brucella_melitensis_biovar_Abortus_chromosome_1<>Brucella_ovis_chromosome_1<>Ochrobactrum_anthropi_ATCC_49188_chromosome_1	-	0	-	T1box11_NC_000964|3'(0)	-	-	-
Brucella_abortus_9-941	|	Candidate_109_NC_006932	|	BruAb1_1477		hypothetical protein	*	<<<	58	|	1457275	1457460	>>>	185	|	135	>>>	BruAb1_1478	carbamoyl-phosphate synthase small subunit	*	candidate	1385	9.3e-57	X	5	-	Brucella_melitensis_chromosome_1<>Brucella_suis_1330_chromosome_1<>Brucella_melitensis_biovar_Abortus_chromosome_1<>Brucella_ovis_chromosome_1<>Ochrobactrum_anthropi_ATCC_49188_chromosome_1	-	0	-	P32_yes_NC_002516|3'(0)	-	-	-
Brucella_abortus_9-941	|	Candidate_182_NC_006932	|	BruAb1_2101		DnaJ, chaperone protein DnaJ	*	>>>	10	|	2069338	2069447	<<<	109	|	0	>>>	BruAb1_2102	PmtA, phospholipid N-methyltransferase	*	candidate	582	4e-20	X	4	RNA	Brucella_melitensis_chromosome_1<>Brucella_suis_1330_chromosome_1<>Brucella_melitensis_biovar_Abortus_chromosome_1<>Brucella_ovis_chromosome_1	-	0	-	tpke11_NC_000913|3'(0)	-	-	-
Brucella_abortus_9-941	|	Candidate_187_NC_006932	|	BruAb1_2132		transcriptional regulator, Cro/CI family	*	>>>	1	|	2096919	2097130	>>>	211	|	13	>>>	BruAb1_2133	S-adenosylmethionine synthetase	*	candidate	1121	9.5e-45	F	4	-	Brucella_melitensis_chromosome_1<>Brucella_suis_1330_chromosome_1<>Brucella_melitensis_biovar_Abortus_chromosome_1<>Brucella_ovis_chromosome_1	-	0	-	S_box8_NC_000964|3'(0),S_box3_NC_002745|3'(0),S_box5_NC_003210|3'(0)	5	-	-
Brucella_abortus_9-941	|	Candidate_253_NC_006932	|	BruAb1_0922		aminotransferase, class I	*	>>>	1	|	904948	905027	>>>	79	|	37	<<<	BruAb1_0923	ribonuclease, Rne/Rng domain protein	*	candidate	590	1.8e-20	Z	4	RNA	Brucella_melitensis_chromosome_1<>Brucella_suis_1330_chromosome_1<>Brucella_melitensis_biovar_Abortus_chromosome_1<>Brucella_ovis_chromosome_1	-	0	Candidate_252_NC_006932(anti)	rne5_NC_000913|3'(0)	-	-	-
Brucella_abortus_9-941	|	Candidate_257_NC_006932	|	BruAb1_0947		ATP-dependent RNA helicase, DEAD/DEAH box	*	>>>	16	|	935027	935247	<<<	220	|	0	<<<	BruAb1_0948	HesB/YadR/YfhF family protein	*	candidate	1170	5.6e-47	Z	4	RNA	Brucella_melitensis_chromosome_1<>Brucella_suis_1330_chromosome_1<>Brucella_melitensis_biovar_Abortus_chromosome_1<>Brucella_ovis_chromosome_1	-	0	-	C0343_NC_000913|3'(0)	-	-	-
Brucella_melitensis	|	Candidate_39_NC_003317	|	BMEI0748		50S ribosomal protein L7/L12	*	>>>	1	|	773364	773483	>>>	119	|	86	>>>	BMEI0749	DNA-directed RNA polymerase beta subunit	*	candidate	615	4.9e-22	T	4	RNA	Brucella_suis_1330_chromosome_1<>Brucella_abortus_9-941_chromosome_1<>Brucella_ovis_chromosome_1<>Ochrobactrum_anthropi_ATCC_49188_chromosome_1	-	0	-	P26_yes_NC_002516|UD(5'(0-0)|3'(0-0))	-	-	-
Brucella_melitensis	|	Candidate_41_NC_003317	|	BMEI0778		adenylate kinase	*	>>>	14	|	798916	798987	>>>	71	|	223	>>>	BMEI0779	30S ribosomal protein S13	*	candidate	1202	1.6e-48	T	4	RNA	Brucella_suis_1330_chromosome_1<>Brucella_abortus_9-941_chromosome_1<>Brucella_ovis_chromosome_1<>Ochrobactrum_anthropi_ATCC_49188_chromosome_1	-	0	-	Alpha_RBS_NC_000913|UD(5'(1-1)|3'(0-0))	-	-	-
Brucella_melitensis	|	Candidate_42_NC_003317	|	BMEI0778		adenylate kinase	*	>>>	14	|	798916	799189	>>>	273	|	21	>>>	BMEI0779	30S ribosomal protein S13	*	candidate	1202	1.6e-48	T	4	RNA	Brucella_suis_1330_chromosome_1<>Brucella_abortus_9-941_chromosome_1<>Brucella_ovis_chromosome_1<>Ochrobactrum_anthropi_ATCC_49188_chromosome_1	-	0	-	Alpha_RBS_NC_000913|UD(5'(1-1)|3'(0-0))	5	-	-
Brucella_melitensis	|	Candidate_76_NC_003317	|	BMEI1027		valyl-tRNA synthetase	*	<<<	78	|	1067004	1067215	<<<	211	|	0	<<<	BMEI1028	hypothetical protein	*	candidate	1423	1.7e-58	Z	1	-	Brucella_ovis_chromosome_1	-	12	Candidate_28_NC_003317(para),Candidate_196_NC_003317(para),Candidate_163_NC_003317(para),Candidate_55_NC_003317(para),Candidate_22_NC_003317(para),Candidate_266_NC_003317(para),Candidate_36_NC_003317(para),Candidate_192_NC_003317(para),Candidate_134_NC_003317(para),Candidate_15_NC_003317(para),Candidate_165_NC_003317(para),Candidate_233_NC_003317(para)	T1box10_NC_000964|3'(0),T1box5_NC_003210|3'(0)	-	-	-
Brucella_melitensis	|	Candidate_83_NC_003317	|	BMEI1056		N-ACETYLMURAMOYL-L-ALANINE AMIDASE	*	<<<	236	|	1099058	1099294	>>>	236	|	301	>>>	BMEI1057	RIBONUCLEASE E / ZINC METALLOPROTEASE	*	candidate	1737	9.2e-73	F	4	-	Brucella_suis_1330_chromosome_1<>Brucella_abortus_9-941_chromosome_1<>Brucella_ovis_chromosome_1<>Ochrobactrum_anthropi_ATCC_49188_chromosome_1	-	0	-	rne5_NC_000913|3'(0)	-	-	-
Brucella_melitensis	|	Candidate_180_NC_003317	|	BMEI2021		FOLYLPOLYGLUTAMATE SYNTHASE / DIHYDROFOLATE	*	>>>	3	|	2079598	2079785	>>>	187	|	22	<<<	BMEI2022	THIOREDOXIN C-1	*	candidate	651	1.7e-23	Z	3	RNA	Brucella_suis_1330_chromosome_1<>Brucella_abortus_9-941_chromosome_1<>Brucella_ovis_chromosome_1	-	6	Candidate_67_NC_003317(anti),Candidate_179_NC_003317(anti),Candidate_93_NC_003317(para),Candidate_94_NC_003317(para),Candidate_26_NC_003317(para),Candidate_27_NC_003317(para),Candidate_194_NC_003317(para),Candidate_204_NC_003317(para)	yfr1_NC_005072|3'(0)	-	-	-
Brucella_melitensis	|	Candidate_231_NC_003317	|	BMEI0526		carbamoyl-phosphate synthase small subunit	*	<<<	90	|	548737	548923	<<<	186	|	0	>>>	BMEI0527	Hypothetical Cytosolic Protein	*	candidate	962	6.8e-38	X	4	RNA	Brucella_suis_1330_chromosome_1<>Brucella_abortus_9-941_chromosome_1<>Brucella_ovis_chromosome_1<>Ochrobactrum_anthropi_ATCC_49188_chromosome_1	-	0	-	P32_yes_NC_002516|3'(0)	-	-	-
Brucella_melitensis	|	Candidate_239_NC_003317	|	BMEI0616		tRNA delta(2)-isopentenylpyrophosphate	*	>>>	1	|	643093	643295	>>>	202	|	42	>>>	BMEI0617	acetolactate synthase III large subunit	*	candidate	990	5.6e-39	Y	4	-	Brucella_suis_1330_chromosome_1<>Brucella_abortus_9-941_chromosome_1<>Brucella_ovis_chromosome_1<>Ochrobactrum_anthropi_ATCC_49188_chromosome_1	-	0	-	T1box11_NC_000964|3'(0)	5	-	-
Brucella_melitensis	|	Candidate_267_NC_003317	|	BMEI0874		ATP-dependent Clp protease proteolytic subunit	*	>>>	2	|	903001	903298	>>>	297	|	81	>>>	BMEI0875	ATP-dependent protease ATP-binding subunit	*	candidate	580	1.5e-20	F	4	-	Brucella_suis_1330_chromosome_1<>Brucella_abortus_9-941_chromosome_1<>Brucella_ovis_chromosome_1<>Ochrobactrum_anthropi_ATCC_49188_chromosome_1	-	0	-	sraA_t15_psrA3_NC_000913|3'(0)	-	-	-
Brucella_melitensis	|	Candidate_268_NC_003317	|	BMEI0875		ATP-dependent protease ATP-binding subunit	*	>>>	17	|	904672	904755	<<<	83	|	297	>>>	BMEI0876	ATP-DEPENDENT PROTEASE LA	*	candidate	209	3.1e-27	X	1	-	Ochrobactrum_anthropi_ATCC_49188_chromosome_1	-	0	-	sraA_t15_psrA3_NC_000913|UD(5'(1-1)|3'(0-0))	-	-	-
Brucella_melitensis	|	Candidate_36_NC_003318	|	BMEII1043		isoleucyl-tRNA synthetase	*	<<<	241	|	1086723	1086824	<<<	101	|	0	<<<	BMEII1044	hypothetical protein	*	candidate	1706	2.4e-71	T	3	-	Brucella_suis_1330_chromosome_2<>Brucella_abortus_9-941_chromosome_2<>Brucella_ovis_chromosome_2	-	0	-	T1box5_NC_000964|3'(0),T1box4_NC_002745|3'(0)	-	-	-
Brucella_melitensis	|	Candidate_79_NC_003318	|	BMEII0523		GLUTAMINE SYNTHETASE	*	<<<	154	|	550280	550376	<<<	96	|	0	<<<	BMEII0524	hypothetical protein	*	candidate	1255	7.6e-51	Z	1	RNA	Brucella_ovis_chromosome_2	-	0	-	P1_yes_NC_002516|3'(0)	-	-	-
Brucella_melitensis_biovar_Abortus	|	Candidate_29_NC_007618	|	BAB1_1184		Ribosomal protein S2:Ribosomal protein S2,	*	<<<	157	|	1156970	1157035	<<<	65	|	604	<<<	BAB1_1186	ATP/GTP-binding site motif A (P-loop)	*	candidate	1110	3e-44	T	2	RNA	Brucella_suis_1330_chromosome_1<>Brucella_abortus_9-941_chromosome_1	-	0	-	tff_t44_ECK0167_NC_000913|3'(0)	-	-	-
Brucella_melitensis_biovar_Abortus	|	Candidate_32_NC_007618	|	BAB1_1233		Ribosomal protein S13	*	<<<	222	|	1204287	1204360	<<<	73	|	12	<<<	BAB1_1234	Shikimate kinase:Adenylate kinase:Adenylate	*	candidate	1196	3e-48	T	4	-	Brucella_suis_1330_chromosome_1<>Brucella_abortus_9-941_chromosome_1<>Brucella_ovis_chromosome_1<>Ochrobactrum_anthropi_ATCC_49188_chromosome_1	-	0	-	Alpha_RBS_NC_000913|UD(5'(1-1)|3'(0-0))	-	-	-
Brucella_melitensis_biovar_Abortus	|	Candidate_34_NC_007618	|	BAB1_1264		RNA polymerase Rpb2, domain 6:RNA polymerase,	*	<<<	86	|	1229798	1229918	<<<	120	|	0	<<<	BAB1_1265	Ribosomal protein L7/L12	*	candidate	615	4.9e-22	T	4	RNA	Brucella_suis_1330_chromosome_1<>Brucella_abortus_9-941_chromosome_1<>Brucella_ovis_chromosome_1<>Ochrobactrum_anthropi_ATCC_49188_chromosome_1	-	0	-	P26_yes_NC_002516|UD(5'(1-1)|3'(0-0))	-	-	-
Brucella_melitensis_biovar_Abortus	|	Candidate_68_NC_007618	|	BAB1_2159		Helix-turn-helix motif	*	>>>	1	|	2094038	2094211	>>>	173	|	51	>>>	BAB1_2160	S-adenosylmethionine synthetase	*	candidate	1121	9.5e-45	T	3	-	Brucella_suis_1330_chromosome_1<>Brucella_abortus_9-941_chromosome_1<>Brucella_ovis_chromosome_1	-	0	-	S_box8_NC_000964|3'(0),S_box3_NC_002745|3'(0),S_box5_NC_003210|3'(0)	5	-	-
Brucella_melitensis_biovar_Abortus	|	Candidate_70_NC_007618	|	BAB1_1072		ATP-dependent helicase, DEAD-box:DEAD/DEAH box	*	>>>	22	|	1038624	1038771	<<<	147	|	0	>>>	BAB1_1073	Cysteine synthase/cystathionine beta-synthase	*	candidate	850	2.2e-32	X	3	RNA	Brucella_suis_1330_chromosome_1<>Brucella_abortus_9-941_chromosome_1<>Brucella_ovis_chromosome_1	-	0	-	C0343_NC_000913|3'(0)	-	-	-
Brucella_melitensis_biovar_Abortus	|	Candidate_74_NC_007618	|	BAB1_1130		Disease resistance protein:Chaperonin	*	<<<	332	|	1098391	1098472	>>>	81	|	17	<<<	BAB1_1131	CbxX/CfqX superfamily:ATP/GTP-binding site motif	*	candidate	209	2.2e-31	X	1	-	Ochrobactrum_anthropi_ATCC_49188_chromosome_1	-	0	-	sraA_t15_psrA3_NC_000913|UD(5'(0-0)|3'(0-0))	-	-	-
Brucella_melitensis_biovar_Abortus	|	Candidate_81_NC_007618	|	BAB1_1190		Histidine triad (HIT) protein	*	>>>	1	|	1161570	1161670	>>>	100	|	4	<<<	BAB1_1191	Chaperonin clpA/B:ATP/GTP-binding site motif A	*	candidate	530	1e-17	Z	3	RNA	Brucella_suis_1330_chromosome_1<>Brucella_abortus_9-941_chromosome_1<>Brucella_ovis_chromosome_1	-	0	-	RyfD_NC_000913|3'(0)	-	-	-E.coli_sig70_3(8.33|-75)
Brucella_melitensis_biovar_Abortus	|	Candidate_98_NC_007618	|	BAB1_1408		Pyruvate decarboxylase:Acetolactate synthase	*	<<<	113	|	1360135	1360337	<<<	202	|	0	<<<	BAB1_1409	ATP/GTP-binding site motif A (P-loop):tRNA	*	candidate	1005	1.2e-39	Z	4	-	Brucella_suis_1330_chromosome_1<>Brucella_abortus_9-941_chromosome_1<>Brucella_ovis_chromosome_1<>Ochrobactrum_anthropi_ATCC_49188_chromosome_1	-	0	-	T1box11_NC_000964|3'(0)	-	-	-
Brucella_melitensis_biovar_Abortus	|	Candidate_107_NC_007618	|	BAB1_1501		GatB/Yqey	*	<<<	1	|	1454372	1454614	>>>	242	|	135	>>>	BAB1_1502	Glutamine amidotransferase	*	candidate	1135	1e-45	X	4	-	Brucella_suis_1330_chromosome_1<>Brucella_abortus_9-941_chromosome_1<>Brucella_ovis_chromosome_1<>Ochrobactrum_anthropi_ATCC_49188_chromosome_1	-	0	-	P32_yes_NC_002516|3'(0)	-	-	-
Brucella_melitensis_biovar_Abortus	|	Candidate_176_NC_007618	|	BAB1_2130		Cytochrome c heme-binding site:DnaJ central	*	>>>	10	|	2066457	2066566	<<<	109	|	0	>>>	BAB1_2131	SAM (and some other nucleotide) binding motif	*	candidate	582	4e-20	X	3	RNA	Brucella_suis_1330_chromosome_1<>Brucella_abortus_9-941_chromosome_1<>Brucella_ovis_chromosome_1	-	0	-	tpke11_NC_000913|3'(0)	-	-	-
Brucella_melitensis_biovar_Abortus	|	Candidate_180_NC_007618	|	BAB1_2159		Helix-turn-helix motif	*	>>>	1	|	2094038	2094249	>>>	211	|	13	>>>	BAB1_2160	S-adenosylmethionine synthetase	*	candidate	1121	9.5e-45	F	3	-	Brucella_suis_1330_chromosome_1<>Brucella_abortus_9-941_chromosome_1<>Brucella_ovis_chromosome_1	-	0	-	S_box8_NC_000964|3'(0),S_box3_NC_002745|3'(0),S_box5_NC_003210|3'(0)	5	-	-
Brucella_melitensis_biovar_Abortus	|	Candidate_244_NC_007618	|	BAB1_0929		1-aminocyclopropane-1-carboxylate	*	>>>	1	|	901226	901305	>>>	79	|	37	<<<	BAB1_0930	Ribonuclease E and G	*	candidate	590	1.8e-20	Z	3	RNA	Brucella_suis_1330_chromosome_1<>Brucella_abortus_9-941_chromosome_1<>Brucella_ovis_chromosome_1	-	0	Candidate_243_NC_007618(anti)	rne5_NC_000913|3'(0)	-	-	-
Brucella_melitensis_biovar_Abortus	|	Candidate_245_NC_007618	|	BAB1_0930		Ribonuclease E and G	*	<<<	301	|	904413	904651	<<<	238	|	138	>>>	BAB1_0931	Cell wall hydrolase/autolysin	*	candidate	1746	3.6e-73	F	4	-	Brucella_suis_1330_chromosome_1<>Brucella_abortus_9-941_chromosome_1<>Brucella_ovis_chromosome_1<>Ochrobactrum_anthropi_ATCC_49188_chromosome_1	-	0	-	rne5_NC_000913|3'(0)	-	-	-
Brucella_melitensis_biovar_Abortus	|	Candidate_248_NC_007618	|	BAB1_0955		ATP-dependent helicase, DEAD-box:DEAD/DEAH box	*	>>>	16	|	932149	932368	<<<	219	|	0	<<<	BAB1_0956	Protein of unknown function, HesB/YadR/YfhF	*	candidate	1180	2e-47	Z	3	RNA	Brucella_suis_1330_chromosome_1<>Brucella_abortus_9-941_chromosome_1<>Brucella_ovis_chromosome_1	-	0	-	C0343_NC_000913|3'(0)	-	-	-
Brucella_melitensis_biovar_Abortus	|	Candidate_18_NC_007624	|	BAB2_0193		Riboflavin kinase / FAD	*	>>>	1	|	186556	186656	>>>	100	|	241	>>>	BAB2_0194	Aminoacyl-tRNA synthetase, class	*	candidate	1706	2.4e-71	T	3	-	Brucella_suis_1330_chromosome_2<>Brucella_abortus_9-941_chromosome_2<>Brucella_ovis_chromosome_2	-	0	-	T1box5_NC_000964|3'(0),T1box4_NC_002745|3'(0)	-	-	-
Brucella_ovis	|	Candidate_15_NC_009504	|	BOV_A0180		riboflavin biosynthesis protein RibF	*	>>>	1	|	183198	183298	>>>	100	|	241	>>>	BOV_A0181	isoleucyl-tRNA synthetase	*	candidate	1706	2.4e-71	T	4	-	Brucella_melitensis_chromosome_2<>Brucella_suis_1330_chromosome_2<>Brucella_abortus_9-941_chromosome_2<>Brucella_melitensis_biovar_Abortus_chromosome_2	-	0	-	T1box5_NC_000964|3'(0),T1box4_NC_002745|3'(0)	-	-	-
Brucella_ovis	|	Candidate_34_NC_009504	|	BOV_A0847		pseudogene	*	>>>	-5	|	887907	888005	<<<	98	|	0	<<<	BOV_A0848	putative oxidoreductase	*	candidate	4173	0	B	2	RNA	Brucella_abortus_9-941_chromosome_2<>Brucella_melitensis_biovar_Abortus_chromosome_2	-	0	-	C15_NC_003047|3'(0),C16_NC_003047|3'(0)	-	-	-
Brucella_ovis	|	Candidate_79_NC_009504	|	BOV_A0714		hypothetical protein	*	>>>	1	|	749191	749289	>>>	98	|	151	>>>	BOV_A0715	glutamine synthetase family protein	*	candidate	1255	7.6e-51	Z	1	RNA	Brucella_melitensis_chromosome_2	-	0	-	P1_yes_NC_002516|3'(0)	-	-	-
Brucella_ovis	|	Candidate_38_NC_009505	|	BOV_1174		ribosomal protein S13	*	<<<	21	|	1194615	1194890	<<<	275	|	12	<<<	BOV_1175	adenylate kinase	*	candidate	1202	1.6e-48	T	5	-	Brucella_melitensis_chromosome_1<>Brucella_suis_1330_chromosome_1<>Brucella_abortus_9-941_chromosome_1<>Brucella_melitensis_biovar_Abortus_chromosome_1<>Ochrobactrum_anthropi_ATCC_49188_chromosome_1	-	0	-	Alpha_RBS_NC_000913|UD(5'(1-1)|3'(0-0))	5	-	-
Brucella_ovis	|	Candidate_39_NC_009505	|	BOV_1174		ribosomal protein S13	*	<<<	223	|	1194817	1194890	<<<	73	|	12	<<<	BOV_1175	adenylate kinase	*	candidate	1202	1.6e-48	T	5	-	Brucella_melitensis_chromosome_1<>Brucella_suis_1330_chromosome_1<>Brucella_abortus_9-941_chromosome_1<>Brucella_melitensis_biovar_Abortus_chromosome_1<>Ochrobactrum_anthropi_ATCC_49188_chromosome_1	-	0	-	Alpha_RBS_NC_000913|UD(5'(1-1)|3'(0-0))	-	-	-
Brucella_ovis	|	Candidate_41_NC_009505	|	BOV_1205		DNA-directed RNA polymerase, beta subunit	*	<<<	68	|	1220311	1220431	<<<	120	|	0	<<<	BOV_1206	ribosomal protein L7/L12	*	candidate	149	1.5e-27	T	5	RNA	Brucella_melitensis_chromosome_1<>Brucella_suis_1330_chromosome_1<>Brucella_abortus_9-941_chromosome_1<>Brucella_melitensis_biovar_Abortus_chromosome_1<>Ochrobactrum_anthropi_ATCC_49188_chromosome_1	-	0	-	P26_yes_NC_002516|UD(5'(1-1)|3'(0-0))	-	-	-
Brucella_ovis	|	Candidate_66_NC_009505	|	BOV_2035		ribosomal protein L20	*	>>>	1	|	2047359	2047439	>>>	80	|	42	>>>	BOV_2036	pseudogene	*	candidate	592	1.3e-20	T	1	RNA	Brucella_melitensis_chromosome_1	-	0	Candidate_196_NC_009505(anti)	T1box1_NC_003210|3'(0)	5	-	-
Brucella_ovis	|	Candidate_67_NC_009505	|	BOV_2071		transcriptional regulator, Cro/CI family	*	>>>	1	|	2084039	2084212	>>>	173	|	51	>>>	BOV_2072	methionine adenosyltransferase	*	candidate	1121	9.5e-45	T	4	-	Brucella_melitensis_chromosome_1<>Brucella_suis_1330_chromosome_1<>Brucella_abortus_9-941_chromosome_1<>Brucella_melitensis_biovar_Abortus_chromosome_1	-	0	-	S_box8_NC_000964|3'(0),S_box3_NC_002745|3'(0),S_box5_NC_003210|3'(0)	5	-	-
Brucella_ovis	|	Candidate_71_NC_009505	|	BOV_1017		ATP-dependent RNA helicase, DEAD/DEAH box	*	>>>	22	|	1031617	1031764	<<<	147	|	0	>>>	BOV_1018	cysteine synthase	*	candidate	850	2.2e-32	X	4	RNA	Brucella_melitensis_chromosome_1<>Brucella_suis_1330_chromosome_1<>Brucella_abortus_9-941_chromosome_1<>Brucella_melitensis_biovar_Abortus_chromosome_1	-	0	-	C0343_NC_000913|3'(0)	-	-	-
Brucella_ovis	|	Candidate_85_NC_009505	|	BOV_1125		HIT family protein	*	>>>	1	|	1149666	1149766	>>>	100	|	4	<<<	BOV_1126	ATP-dependent Clp protease ATP-binding subunit	*	candidate	530	1e-17	Z	4	RNA	Brucella_melitensis_chromosome_1<>Brucella_suis_1330_chromosome_1<>Brucella_abortus_9-941_chromosome_1<>Brucella_melitensis_biovar_Abortus_chromosome_1	-	0	-	RyfD_NC_000913|3'(0)	-	-	-E.coli_sig70_3(8.33|-75)
Brucella_ovis	|	Candidate_107_NC_009505	|	BOV_1346		acetolactate synthase, large subunit,	*	<<<	113	|	1351592	1351794	<<<	202	|	0	<<<	BOV_1347	tRNA delta(2)-isopentenylpyrophosphate	*	candidate	996	3e-39	Z	5	-	Brucella_melitensis_chromosome_1<>Brucella_suis_1330_chromosome_1<>Brucella_abortus_9-941_chromosome_1<>Brucella_melitensis_biovar_Abortus_chromosome_1<>Ochrobactrum_anthropi_ATCC_49188_chromosome_1	-	0	-	T1box11_NC_000964|3'(0)	-	-	-
Brucella_ovis	|	Candidate_109_NC_009505	|	BOV_1397		Mn2+/Fe2+ transporter, NRAMP family	*	>>>	609	|	1409317	1409381	<<<	64	|	27	<<<	BOV_1399	transglycosylase SLT domain protein	*	candidate	199	2.8e-19	Z	4	RNA	Brucella_melitensis_biovar_Abortus_chromosome_1<>Cyanobacteria_bacterium_Yellowstone_A-Prime_chromosome<>Rhizobium_leguminosarum_bv_viciae_3841_chromosome<>Ochrobactrum_anthropi_ATCC_49188_chromosome_1	-	1	Candidate_45_NC_009505(tandem),Candidate_46_NC_009505(opp),Candidate_108_NC_009505(opp),Candidate_110_NC_009505(anti)	RNaseP_bact_a_NC_003047|UD(5'(0-1)|3'(1-1))	-	-	-
Brucella_ovis	|	Candidate_120_NC_009505	|	BOV_1438		hypothetical protein	*	<<<	58	|	1446720	1446905	>>>	185	|	135	>>>	BOV_1439	carbamoyl-phosphate synthase, small subunit	*	candidate	1376	2.4e-56	X	5	-	Brucella_melitensis_chromosome_1<>Brucella_suis_1330_chromosome_1<>Brucella_abortus_9-941_chromosome_1<>Brucella_melitensis_biovar_Abortus_chromosome_1<>Ochrobactrum_anthropi_ATCC_49188_chromosome_1	-	0	-	P32_yes_NC_002516|3'(0)	-	-	-
Brucella_ovis	|	Candidate_185_NC_009505	|	BOV_0172		pseudogene	*	>>>	82	|	190292	190425	<<<	133	|	0	>>>	BOV_0173	siroheme synthase	*	candidate	1071	1.8e-42	F	4	-	Brucella_melitensis_chromosome_1<>Brucella_suis_1330_chromosome_1<>Brucella_abortus_9-941_chromosome_1<>Brucella_melitensis_biovar_Abortus_chromosome_1	-	0	-	P28_yes_NC_002516|3'(0)	-	-	-
Brucella_ovis	|	Candidate_200_NC_009505	|	BOV_2071		transcriptional regulator, Cro/CI family	*	>>>	1	|	2084039	2084250	>>>	211	|	13	>>>	BOV_2072	methionine adenosyltransferase	*	candidate	1121	9.5e-45	F	4	-	Brucella_melitensis_chromosome_1<>Brucella_suis_1330_chromosome_1<>Brucella_abortus_9-941_chromosome_1<>Brucella_melitensis_biovar_Abortus_chromosome_1	-	0	-	S_box8_NC_000964|3'(0),S_box3_NC_002745|3'(0),S_box5_NC_003210|3'(0)	5	-	-
Brucella_ovis	|	Candidate_259_NC_009505	|	BOV_0907		aminotransferase, class I	*	>>>	1	|	910157	910236	>>>	79	|	37	<<<	BOV_0908	ribonuclease, Rne/Rng domain protein	*	candidate	590	1.8e-20	Z	4	RNA	Brucella_melitensis_chromosome_1<>Brucella_suis_1330_chromosome_1<>Brucella_abortus_9-941_chromosome_1<>Brucella_melitensis_biovar_Abortus_chromosome_1	-	0	Candidate_258_NC_009505(anti)	rne5_NC_000913|3'(0)	-	-	-
Brucella_ovis	|	Candidate_263_NC_009505	|	BOV_0933		ATP-dependent RNA helicase, DEAD/DEAH box	*	>>>	16	|	940111	940330	<<<	219	|	0	<<<	BOV_0934	hesb protein	*	candidate	1180	2e-47	Z	4	RNA	Brucella_melitensis_chromosome_1<>Brucella_suis_1330_chromosome_1<>Brucella_abortus_9-941_chromosome_1<>Brucella_melitensis_biovar_Abortus_chromosome_1	-	0	-	C0343_NC_000913|3'(0)	-	-	-
Brucella_ovis	|	Candidate_265_NC_009505	|	BOV_0939		hypothetical protein	*	>>>	1	|	945297	945507	>>>	210	|	78	>>>	BOV_0940	valyl-tRNA synthetase	*	candidate	1423	1.7e-58	Z	1	-	Brucella_melitensis_chromosome_1	-	15	Candidate_13_NC_009505(para),Candidate_55_NC_009505(para),Candidate_155_NC_009505(para),Candidate_156_NC_009505(para),Candidate_58_NC_009505(para),Candidate_24_NC_009505(para),Candidate_213_NC_009505(para),Candidate_80_NC_009505(para),Candidate_205_NC_009505(para),Candidate_44_NC_009505(para),Candidate_221_NC_009505(para),Candidate_160_NC_009505(para),Candidate_64_NC_009505(para),Candidate_117_NC…	T1box10_NC_000964|3'(0),T1box5_NC_003210|3'(0)	5	-	-
Brucella_suis_1330	|	Candidate_35_NC_004310	|	BR1211		30S ribosomal protein S13	*	<<<	21	|	1188827	1189102	<<<	275	|	12	<<<	BR1212	adenylate kinase	*	candidate	1202	1.6e-48	T	5	-	Brucella_melitensis_chromosome_1<>Brucella_abortus_9-941_chromosome_1<>Brucella_melitensis_biovar_Abortus_chromosome_1<>Brucella_ovis_chromosome_1<>Ochrobactrum_anthropi_ATCC_49188_chromosome_1	-	0	-	Alpha_RBS_NC_000913|UD(5'(1-1)|3'(0-0))	5	-	-
Brucella_suis_1330	|	Candidate_36_NC_004310	|	BR1211		30S ribosomal protein S13	*	<<<	223	|	1189029	1189102	<<<	73	|	12	<<<	BR1212	adenylate kinase	*	candidate	1202	1.6e-48	T	5	-	Brucella_melitensis_chromosome_1<>Brucella_abortus_9-941_chromosome_1<>Brucella_melitensis_biovar_Abortus_chromosome_1<>Brucella_ovis_chromosome_1<>Ochrobactrum_anthropi_ATCC_49188_chromosome_1	-	0	-	Alpha_RBS_NC_000913|UD(5'(1-1)|3'(0-0))	-	-	-
Brucella_suis_1330	|	Candidate_38_NC_004310	|	BR1244		hypothetical protein	*	>>>	-4	|	1214541	1214661	<<<	120	|	0	<<<	BR1245	50S ribosomal protein L7/L12	*	candidate	543	8.8e-19	T	5	RNA	Brucella_melitensis_chromosome_1<>Brucella_abortus_9-941_chromosome_1<>Brucella_melitensis_biovar_Abortus_chromosome_1<>Brucella_ovis_chromosome_1<>Ochrobactrum_anthropi_ATCC_49188_chromosome_1	-	0	-	P26_yes_NC_002516|UD(5'(0-0)|3'(1-0))	-	-	-
Brucella_suis_1330	|	Candidate_72_NC_004310	|	BR2159		transcriptional regulator, Cro/CI family	*	>>>	1	|	2080451	2080624	>>>	173	|	51	>>>	BR2160	S-adenosylmethionine synthetase	*	candidate	1121	9.5e-45	T	4	-	Brucella_melitensis_chromosome_1<>Brucella_abortus_9-941_chromosome_1<>Brucella_melitensis_biovar_Abortus_chromosome_1<>Brucella_ovis_chromosome_1	-	0	-	S_box8_NC_000964|3'(0),S_box3_NC_002745|3'(0),S_box5_NC_003210|3'(0)	5	-	-
Brucella_suis_1330	|	Candidate_73_NC_004310	|	BR1052		ATP-dependent RNA helicase, DEAD/DEAH box	*	>>>	22	|	1022544	1022691	<<<	147	|	0	>>>	BR1053	cysteine synthase	*	candidate	850	2.2e-32	X	4	RNA	Brucella_melitensis_chromosome_1<>Brucella_abortus_9-941_chromosome_1<>Brucella_melitensis_biovar_Abortus_chromosome_1<>Brucella_ovis_chromosome_1	-	0	-	C0343_NC_000913|3'(0)	-	-	-
Brucella_suis_1330	|	Candidate_85_NC_004310	|	BR1168		HIT family protein	*	>>>	1	|	1147058	1147158	>>>	100	|	4	<<<	BR1169	ATP-dependent Clp protease, ATP-binding subunit	*	candidate	530	1e-17	Z	4	RNA	Brucella_melitensis_chromosome_1<>Brucella_abortus_9-941_chromosome_1<>Brucella_melitensis_biovar_Abortus_chromosome_1<>Brucella_ovis_chromosome_1	-	0	-	RyfD_NC_000913|3'(0)	-	-	-E.coli_sig70_3(8.33|-75)
Brucella_suis_1330	|	Candidate_102_NC_004310	|	BR1389		acetolactate synthase III large subunit	*	<<<	113	|	1344890	1345092	<<<	202	|	0	<<<	BR1390	tRNA delta(2)-isopentenylpyrophosphate	*	candidate	1005	1.2e-39	Z	5	-	Brucella_melitensis_chromosome_1<>Brucella_abortus_9-941_chromosome_1<>Brucella_melitensis_biovar_Abortus_chromosome_1<>Brucella_ovis_chromosome_1<>Ochrobactrum_anthropi_ATCC_49188_chromosome_1	-	0	-	T1box11_NC_000964|3'(0)	-	-	-
Brucella_suis_1330	|	Candidate_109_NC_004310	|	BR1482		hypothetical protein	*	<<<	58	|	1439211	1439396	>>>	185	|	135	>>>	BR1483	carbamoyl-phosphate synthase small subunit	*	candidate	1376	2.4e-56	X	5	-	Brucella_melitensis_chromosome_1<>Brucella_abortus_9-941_chromosome_1<>Brucella_melitensis_biovar_Abortus_chromosome_1<>Brucella_ovis_chromosome_1<>Ochrobactrum_anthropi_ATCC_49188_chromosome_1	-	0	-	P32_yes_NC_002516|3'(0)	-	-	-
Brucella_suis_1330	|	Candidate_186_NC_004310	|	BR2159		transcriptional regulator, Cro/CI family	*	>>>	1	|	2080451	2080662	>>>	211	|	13	>>>	BR2160	S-adenosylmethionine synthetase	*	candidate	1121	9.5e-45	F	4	-	Brucella_melitensis_chromosome_1<>Brucella_abortus_9-941_chromosome_1<>Brucella_melitensis_biovar_Abortus_chromosome_1<>Brucella_ovis_chromosome_1	-	0	-	S_box8_NC_000964|3'(0),S_box3_NC_002745|3'(0),S_box5_NC_003210|3'(0)	5	-	-
Brucella_suis_1330	|	Candidate_244_NC_004310	|	BR0911		aminotransferase, class I	*	>>>	1	|	883256	883335	>>>	79	|	37	<<<	BR0912	ribonuclease, Rne/Rng domain protein	*	candidate	590	1.8e-20	Z	4	RNA	Brucella_melitensis_chromosome_1<>Brucella_abortus_9-941_chromosome_1<>Brucella_melitensis_biovar_Abortus_chromosome_1<>Brucella_ovis_chromosome_1	-	0	Candidate_243_NC_004310(anti)	rne5_NC_000913|3'(0)	-	-	-
Brucella_suis_1330	|	Candidate_249_NC_004310	|	BR0938		ATP-dependent RNA helicase, DEAD/DEAH box	*	>>>	16	|	913336	913555	<<<	219	|	0	<<<	BR0939	HesB/YadR/YfhF family protein	*	candidate	1180	2e-47	Z	4	RNA	Brucella_melitensis_chromosome_1<>Brucella_abortus_9-941_chromosome_1<>Brucella_melitensis_biovar_Abortus_chromosome_1<>Brucella_ovis_chromosome_1	-	0	-	C0343_NC_000913|3'(0)	-	-	-
Burkholderia_383	|	Candidate_13_NC_007510	|	Bcep18194_A5770		surface antigen (D15)	*	<<<	38	|	2887994	2888221	<<<	227	|	0	>>>	Bcep18194_A5771	hypothetical protein	*	candidate	522	1e-17	R	2	RNA	Burkholderia_cepacia_AMMD_chromosome_1<>Burkholderia_vietnamiensis_G4_chromosome_1	-	0	-	SRP_bact_NC_003047|3'(0),Cobalamin2_NC_002516|3'(0)	-	-	-
Burkholderia_383	|	Candidate_21_NC_007510	|	Bcep18194_A3919		transcriptional regulator, LysR family	*	<<<	517	|	834810	835051	<<<	241	|	0	>>>	Bcep18194_A3920	Aminotransferase, class V	*	candidate	478	3.8e-36	R	3	RNA	Burkholderia_cenocepacia_AU_1054_chromosome_1<>Burkholderia_cepacia_AMMD_chromosome_1<>Burkholderia_vietnamiensis_G4_chromosome_1	-	0	-	Cobalamin1_NC_002516|3'(0)	-	-	-
Burkholderia_383	|	Candidate_24_NC_007510	|	Bcep18194_A3248		hypothetical protein	*	>>>	541	|	82679	82787	<<<	108	|	21	>>>	Bcep18194_A3249	Sodium/hydrogen exchanger	*	candidate	248	1.5e-30	R	8	-	Burkholderia_pseudomallei_K96243_chromosome_1<>Burkholderia_thailandensis_E264_chromosome_1<>Burkholderia_xenovorans_LB400_chromosome_1<>Burkholderia_mallei_SAVP1_chromosome_2<>Burkholderia_mallei_NCTC_10229_chromosome_2<>Burkholderia_pseudomallei_668_chromosome_1<>Burkholderia_pseudomallei_1106a_chromosome_1<>Burkholderia_mallei_NCTC_10247_chromosome_2	-	0	-	SRP_bact_NC_003047|3'(0)	-	-	-
Burkholderia_383	|	Candidate_26_NC_007510	|	Bcep18194_A3293		primosome assembly protein PriA	*	>>>	96	|	130700	130927	>>>	227	|	71	>>>	Bcep18194_A3294	delta-1-pyrroline-5-carboxylate dehydrogenase 3	*	candidate	1082	2.9e-43	T	4	-	Burkholderia_cenocepacia_AU_1054_chromosome_1<>Burkholderia_cepacia_AMMD_chromosome_1<>Burkholderia_cenocepacia_HI2424_chromosome_1<>Burkholderia_vietnamiensis_G4_chromosome_1	-	0	-	P18_yes_NC_002516|UD(5'(0-0)|3'(0-1)),P20_yes_NC_002516|3'(0),Cobalamin1_NC_002516|3'(0),Cobalamin2_NC_002516|3'(0),SRP_bact_NC_003047|3'(0)	5	-	-
Burkholderia_383	|	Candidate_30_NC_007510	|	Bcep18194_A3498		protein of unknown function DUF1568	*	>>>	8	|	362660	362780	>>>	120	|	160	>>>	Bcep18194_A3499	Glutamate synthase (ferredoxin)	*	candidate	489	2.5e-16	T	11	-	Burkholderia_mallei_ATCC_23344_chromosome_1<>Burkholderia_pseudomallei_K96243_chromosome_1<>Burkholderia_xenovorans_LB400_chromosome_1<>Burkholderia_cenocepacia_AU_1054_chromosome_1<>Burkholderia_cepacia_AMMD_chromosome_1<>Burkholderia_cenocepacia_HI2424_chromosome_1<>Burkholderia_mallei_SAVP1_chromosome_2<>Burkholderia_mallei_NCTC_10229_chromosome_2<>Burkholderia_pseudomallei_668_chromosome_1<>B…	-	0	-	P26_yes_NC_002516|3'(0),SRP_bact_NC_003047|3'(0)	-	-	-
Burkholderia_383	|	Candidate_60_NC_007510	|	Bcep18194_A6474		Fmu, rRNA SAM-dependent methyltransferase	*	<<<	153	|	3643409	3643484	<<<	75	|	9	<<<	Bcep18194_A6475	heat shock protein HtpX	*	candidate	803	2.2e-30	T	2	RNA	Burkholderia_cenocepacia_AU_1054_chromosome_1<>Burkholderia_cenocepacia_HI2424_chromosome_1	-	0	-	SRP_bact_NC_003047|3'(0)	-	-	-
Burkholderia_383	|	Candidate_69_NC_007510	|	Bcep18194_A4171		Alpha/beta hydrolase	*	<<<	43	|	1107966	1108136	>>>	170	|	4	>>>	Bcep18194_A4172	ABC metal ion transporter, ATPase subunit	*	candidate	700	1.3e-25	F	2	RNA	Burkholderia_cepacia_AMMD_chromosome_1<>Burkholderia_vietnamiensis_G4_chromosome_1	-	0	-	S_box9_NC_000964|3'(0),S_box2_NC_002745|3'(0)	5	-	-
Burkholderia_383	|	Candidate_74_NC_007510	|	Bcep18194_A4222		molybdenum cofactor biosynthesis protein A	*	<<<	1	|	1157367	1157477	>>>	110	|	19	<<<	Bcep18194_A4223	Ribonuclease E and G	*	candidate	560	3.6e-19	X	3	RNA	Burkholderia_cenocepacia_AU_1054_chromosome_1<>Burkholderia_cepacia_AMMD_chromosome_1<>Burkholderia_cenocepacia_HI2424_chromosome_1	-	6	Candidate_114_NC_007510(para),Candidate_155_NC_007510(para),Candidate_280_NC_007510(para),Candidate_281_NC_007510(para),Candidate_148_NC_007510(para),Candidate_149_NC_007510(para)	rne5_NC_000913|3'(0),P20_yes_NC_002516|3'(0)	-	-	-
Burkholderia_383	|	Candidate_83_NC_007510	|	Bcep18194_A4306		Secretion protein HlyD family	*	<<<	117	|	1253155	1253291	<<<	136	|	181	<<<	Bcep18194_A4308	transcriptional regulator, IclR family	*	candidate	1088	2.6e-43	F	6	-	Burkholderia_pseudomallei_K96243_chromosome_1<>Burkholderia_pseudomallei_1710b_chromosome_1<>Burkholderia_cenocepacia_AU_1054_chromosome_1<>Burkholderia_cepacia_AMMD_chromosome_1<>Burkholderia_cenocepacia_HI2424_chromosome_1<>Burkholderia_vietnamiensis_G4_chromosome_1	-	0	-	ryeC_tp11_QUAD1a_NC_000913|3'(0),ryeD_tpe60_QUAD1b_NC_000913|3'(0),P18_yes_NC_002516|3'(0)	-	-	-
Burkholderia_383	|	Candidate_92_NC_007510	|	Bcep18194_A4398		Major facilitator superfamily (MFS_1)	*	<<<	405	|	1359688	1359991	<<<	303	|	21	<<<	Bcep18194_A4399	transcriptional regulator, LysR family	*	candidate	699	5e-26	Y	4	RNA	Burkholderia_cenocepacia_AU_1054_chromosome_1<>Burkholderia_cepacia_AMMD_chromosome_1<>Burkholderia_cenocepacia_HI2424_chromosome_1<>Burkholderia_vietnamiensis_G4_chromosome_1	-	1	Candidate_91_NC_007510(opp),Candidate_94_NC_007510(anti)	P20_yes_NC_002516|3'(0)	-	-	-
Burkholderia_383	|	Candidate_93_NC_007510	|	Bcep18194_A4398		Major facilitator superfamily (MFS_1)	*	<<<	545	|	1359828	1359991	<<<	163	|	21	<<<	Bcep18194_A4399	transcriptional regulator, LysR family	*	candidate	699	5e-26	F	4	RNA	Burkholderia_cenocepacia_AU_1054_chromosome_1<>Burkholderia_cepacia_AMMD_chromosome_1<>Burkholderia_cenocepacia_HI2424_chromosome_1<>Burkholderia_vietnamiensis_G4_chromosome_1	-	1	Candidate_91_NC_007510(opp),Candidate_94_NC_007510(anti)	P20_yes_NC_002516|3'(0)	-	-	-
Burkholderia_383	|	Candidate_95_NC_007510	|	Bcep18194_A4431		Major facilitator superfamily (MFS_1)	*	>>>	17	|	1389364	1389470	>>>	106	|	244	>>>	Bcep18194_A4432	carbamoyl-phosphate synthase small subunit	*	candidate	1480	3.7e-61	F	11	RNA	Burkholderia_mallei_ATCC_23344_chromosome_1<>Burkholderia_pseudomallei_K96243_chromosome_1<>Burkholderia_pseudomallei_1710b_chromosome_1<>Burkholderia_thailandensis_E264_chromosome_1<>Burkholderia_cenocepacia_AU_1054_chromosome_1<>Burkholderia_cepacia_AMMD_chromosome_1<>Burkholderia_cenocepacia_HI2424_chromosome_1<>Burkholderia_mallei_SAVP1_chromosome_2<>Burkholderia_mallei_NCTC_10229_chromosome_…	-	0	-	P32_yes_NC_002516|3'(0)	-	-	-
Burkholderia_383	|	Candidate_106_NC_007510	|	Bcep18194_A3311		transcriptional regulator, LysR family	*	<<<	1	|	155659	155803	>>>	144	|	9	>>>	Bcep18194_A3312	Major facilitator superfamily (MFS_1)	*	candidate	648	3e-23	F	2	-	Burkholderia_cenocepacia_AU_1054_chromosome_1<>Burkholderia_cenocepacia_HI2424_chromosome_1	-	0	-	Cobalamin2_NC_002516|3'(0),P20_yes_NC_002516|3'(0)	5	-	-
Burkholderia_383	|	Candidate_107_NC_007510	|	Bcep18194_A4585		valyl-tRNA synthetase	*	<<<	1	|	1564181	1564371	>>>	190	|	21	>>>	Bcep18194_A4586	UvrD/REP helicase	*	candidate	527	6.2e-18	F	1	-	Burkholderia_cenocepacia_HI2424_chromosome_1	-	0	-	CsrB_NC_002505|3'(0),SRP_bact_NC_003047|3'(0),P20_yes_NC_002516|3'(0),Cobalamin2_NC_002516|3'(0),Cobalamin1_NC_002516|3'(0)	5	-	-
Burkholderia_383	|	Candidate_109_NC_007510	|	Bcep18194_A4603		putative transcriptional regulator, XRE family	*	>>>	3	|	1584260	1584342	>>>	82	|	53	>>>	Bcep18194_A4604	Major facilitator superfamily (MFS_1)	*	candidate	501	1.6e-16	Z	4	RNA	Burkholderia_cenocepacia_AU_1054_chromosome_1<>Burkholderia_cepacia_AMMD_chromosome_1<>Burkholderia_cenocepacia_HI2424_chromosome_1<>Burkholderia_vietnamiensis_G4_chromosome_1	-	0	-	SRP_bact_NC_003047|3'(0)	5	-	-
Burkholderia_383	|	Candidate_110_NC_007510	|	trRNA		trRNA	*	>>>	15	|	1597135	1597318	>>>	183	|	75	>>>	Bcep18194_A4615	threonyl-tRNA synthetase	*	candidate	648	1.9e-23	Z	11	RNA	Burkholderia_mallei_ATCC_23344_chromosome_1<>Burkholderia_pseudomallei_K96243_chromosome_1<>Burkholderia_thailandensis_E264_chromosome_1<>Burkholderia_xenovorans_LB400_chromosome_1<>Burkholderia_cepacia_AMMD_chromosome_1<>Burkholderia_mallei_SAVP1_chromosome_2<>Burkholderia_mallei_NCTC_10229_chromosome_2<>Burkholderia_pseudomallei_668_chromosome_1<>Burkholderia_pseudomallei_1106a_chromosome_1<>Bu…	-	0	-	T1box15_NC_000964|3'(0),T1box16_NC_000964|3'(0),T1box17_NC_000964|3'(0),T1box12_NC_000964|3'(0),T1box6_NC_003210|3'(0)	5	-	-E.coli_sig70_2(11.14|-284)
Burkholderia_383	|	Candidate_120_NC_007510	|	Bcep18194_A3322		hypothetical protein	*	<<<	81	|	168745	168811	<<<	66	|	3	<<<	Bcep18194_A3323	glycine dehydrogenase	*	candidate	496	2.4e-16	Z	3	RNA	Burkholderia_cenocepacia_AU_1054_chromosome_1<>Burkholderia_cepacia_AMMD_chromosome_1<>Burkholderia_cenocepacia_HI2424_chromosome_1	-	0	-	P20_yes_NC_002516|3'(0)	3	-	-
Burkholderia_383	|	Candidate_127_NC_007510	|	Bcep18194_A3327		Oxidoreductase-like	*	<<<	1	|	175554	175708	>>>	154	|	78	<<<	Bcep18194_A3328	hypothetical protein	*	candidate	618	2.9e-22	F	3	-	Burkholderia_cenocepacia_AU_1054_chromosome_1<>Burkholderia_cepacia_AMMD_chromosome_1<>Burkholderia_cenocepacia_HI2424_chromosome_1	-	0	-	Cobalamin1_NC_002516|3'(0)	-	-	-
Burkholderia_383	|	Candidate_129_NC_007510	|	Bcep18194_A4765		Peptidase M23B	*	<<<	97	|	1763005	1763229	<<<	224	|	17	<<<	Bcep18194_A4766	transcriptional regulator, TetR family	*	candidate	1128	3.4e-45	Z	4	RNA	Burkholderia_cenocepacia_AU_1054_chromosome_1<>Burkholderia_cepacia_AMMD_chromosome_1<>Burkholderia_cenocepacia_HI2424_chromosome_1<>Burkholderia_vietnamiensis_G4_chromosome_1	-	0	-	P20_yes_NC_002516|3'(0)	-	-	-
Burkholderia_383	|	Candidate_130_NC_007510	|	Bcep18194_A3328		hypothetical protein	*	<<<	163	|	176658	176780	<<<	122	|	0	>>>	Bcep18194_A3329	UvrD/REP helicase	*	candidate	625	1.7e-22	F	4	RNA	Burkholderia_cenocepacia_AU_1054_chromosome_1<>Burkholderia_cepacia_AMMD_chromosome_1<>Burkholderia_cenocepacia_HI2424_chromosome_1<>Burkholderia_vietnamiensis_G4_chromosome_1	-	0	-	Cobalamin1_NC_002516|3'(0)	-	-	-
Burkholderia_383	|	Candidate_140_NC_007510	|	Bcep18194_A5134		50S ribosomal protein L31	*	>>>	1	|	2178898	2178969	>>>	71	|	71	>>>	Bcep18194_A5135	4-amino-4-deoxy-L-arabinose transferase and	*	candidate	551	8.3e-19	Z	3	RNA	Burkholderia_cenocepacia_AU_1054_chromosome_3<>Burkholderia_cepacia_AMMD_chromosome_1<>Burkholderia_cenocepacia_HI2424_chromosome_1	-	0	Candidate_139_NC_007510(anti)	Cobalamin1_NC_002516|3'(0),P15_yes_NC_002516|3'(0),P34_yes_NC_002516|3'(0)	5	-	-
Burkholderia_383	|	Candidate_144_NC_007510	|	Bcep18194_A5174		30S ribosomal protein S6	*	<<<	2	|	2220787	2220971	>>>	184	|	56	<<<	Bcep18194_A5175	putative transmembrane transcriptional regulator	*	candidate	559	2.2e-19	X	13	-	Burkholderia_mallei_ATCC_23344_chromosome_1<>Burkholderia_pseudomallei_K96243_chromosome_1<>Burkholderia_pseudomallei_1710b_chromosome_1<>Burkholderia_thailandensis_E264_chromosome_1<>Burkholderia_cenocepacia_AU_1054_chromosome_3<>Burkholderia_cepacia_AMMD_chromosome_1<>Burkholderia_cenocepacia_HI2424_chromosome_1<>Burkholderia_mallei_SAVP1_chromosome_2<>Burkholderia_mallei_NCTC_10229_chromosome_…	-	0	-	Cobalamin1_NC_002516|3'(0)	-	-	-
Burkholderia_383	|	Candidate_148_NC_007510	|	Bcep18194_A5221		PpiC-type peptidyl-prolyl cis-trans isomerase	*	<<<	110	|	2274869	2275216	<<<	347	|	3	<<<	trRNA	trRNA	*	candidate	498	8.9e-17	Z	2	RNA	Burkholderia_cenocepacia_AU_1054_chromosome_3<>Burkholderia_cenocepacia_HI2424_chromosome_1	-	2	Candidate_149_NC_007510(tandem),Candidate_155_NC_007510(para)	P20_yes_NC_002516|3'(0)	-	-	-
Burkholderia_383	|	Candidate_149_NC_007510	|	Bcep18194_A5221		PpiC-type peptidyl-prolyl cis-trans isomerase	*	<<<	240	|	2274999	2275165	<<<	166	|	54	<<<	trRNA	trRNA	*	candidate	570	7.2e-20	Z	5	RNA	Burkholderia_cenocepacia_AU_1054_chromosome_3<>Ralstonia_eutropha_H16_chromosome_1<>Burkholderia_cepacia_AMMD_chromosome_1<>Burkholderia_cenocepacia_HI2424_chromosome_1<>Burkholderia_vietnamiensis_G4_chromosome_1	-	2	Candidate_148_NC_007510(tandem),Candidate_155_NC_007510(para)	P20_yes_NC_002516|3'(0)	-	-	-
Burkholderia_383	|	Candidate_190_NC_007510	|	Bcep18194_A5767		OmpA/MotB family protein	*	>>>	79	|	2879512	2879643	>>>	131	|	165	>>>	Bcep18194_A5768	methionyl-tRNA synthetase	*	candidate	481	4.8e-16	Z	12	RNA	Burkholderia_pseudomallei_K96243_chromosome_1<>Burkholderia_pseudomallei_1710b_chromosome_1<>Burkholderia_thailandensis_E264_chromosome_1<>Burkholderia_xenovorans_LB400_chromosome_1<>Burkholderia_cepacia_AMMD_chromosome_1<>Burkholderia_cenocepacia_HI2424_chromosome_1<>Burkholderia_mallei_SAVP1_chromosome_2<>Burkholderia_mallei_NCTC_10229_chromosome_2<>Burkholderia_pseudomallei_668_chromosome_1<>B…	-	0	-	P20_yes_NC_002516|3'(0)	-	-	-
Burkholderia_383	|	Candidate_201_NC_007510	|	Bcep18194_A5852		cold-shock DNA-binding domain protein	*	>>>	1	|	2969417	2969512	>>>	95	|	87	<<<	Bcep18194_A5853	Multicopper oxidase, type 3	*	candidate	526	9.1e-18	Y	4	RNA	Burkholderia_cenocepacia_AU_1054_chromosome_1<>Burkholderia_cepacia_AMMD_chromosome_1<>Burkholderia_cenocepacia_HI2424_chromosome_1<>Burkholderia_vietnamiensis_G4_chromosome_1	-	0	Candidate_50_NC_007510(anti)	P26_yes_NC_002516|3'(0)	-	-	-
Burkholderia_383	|	Candidate_205_NC_007510	|	Bcep18194_A5936		Carbohydrate kinase, FGGY	*	<<<	1	|	3061356	3061424	>>>	68	|	369	>>>	Bcep18194_A5937	Xanthine/uracil transporter	*	candidate	1647	8.6e-69	F	2	-	Burkholderia_cenocepacia_AU_1054_chromosome_1<>Burkholderia_cenocepacia_HI2424_chromosome_1	-	0	-	P11_yes_NC_002516|UD(5'(0-1)|3'(1-0)),Cobalamin1_NC_002516|UD(5'(0-0)|3'(1-0))	-	-	-
Burkholderia_383	|	Candidate_206_NC_007510	|	Bcep18194_A5950		Serine-type D-Ala-D-Ala carboxypeptidase	*	>>>	208	|	3079970	3080159	<<<	189	|	0	>>>	Bcep18194_A5951	Sterol desaturase-like	*	candidate	1012	3.1e-40	X	4	RNA	Burkholderia_cenocepacia_AU_1054_chromosome_1<>Burkholderia_cepacia_AMMD_chromosome_1<>Burkholderia_cenocepacia_HI2424_chromosome_1<>Burkholderia_vietnamiensis_G4_chromosome_1	-	0	-	P15_yes_NC_002516|3'(0),SRP_bact_NC_003047|3'(0)	-	-	-
Burkholderia_383	|	Candidate_210_NC_007510	|	Bcep18194_A5995		Copper resistance D	*	<<<	175	|	3129240	3129444	<<<	204	|	53	>>>	Bcep18194_A5996	Cytochrome c, class I	*	candidate	1548	2.9e-64	F	4	-	Burkholderia_cenocepacia_AU_1054_chromosome_1<>Burkholderia_cepacia_AMMD_chromosome_1<>Burkholderia_cenocepacia_HI2424_chromosome_1<>Burkholderia_vietnamiensis_G4_chromosome_1	-	0	-	Cobalamin3_NC_002516|3'(0)	-	-	-
Burkholderia_383	|	Candidate_229_NC_007510	|	Bcep18194_A6149		Cyd operon protein YbgT	*	>>>	8	|	3292862	3292919	>>>	57	|	564	>>>	Bcep18194_A6150	Beta-N-acetylhexosaminidase	*	candidate	736	7.1e-28	Z	5	RNA	Burkholderia_thailandensis_E264_chromosome_1<>Burkholderia_cenocepacia_AU_1054_chromosome_1<>Burkholderia_cepacia_AMMD_chromosome_1<>Burkholderia_cenocepacia_HI2424_chromosome_1<>Burkholderia_vietnamiensis_G4_chromosome_1	-	0	-	Cobalamin2_NC_002516|3'(0),Cobalamin1_NC_002516|3'(0),P20_yes_NC_002516|3'(0),SRP_bact_NC_003047|3'(0)	-	-	-
Burkholderia_383	|	Candidate_234_NC_007510	|	Bcep18194_A6215		C4-dicarboxylate transport protein	*	<<<	78	|	3371799	3371926	>>>	127	|	152	<<<	Bcep18194_A6216	acetate permease	*	candidate	998	2e-39	F	13	-	Burkholderia_mallei_ATCC_23344_chromosome_1<>Burkholderia_pseudomallei_K96243_chromosome_1<>Burkholderia_pseudomallei_1710b_chromosome_1<>Burkholderia_thailandensis_E264_chromosome_1<>Burkholderia_cenocepacia_AU_1054_chromosome_1<>Burkholderia_cepacia_AMMD_chromosome_1<>Burkholderia_cenocepacia_HI2424_chromosome_1<>Burkholderia_mallei_SAVP1_chromosome_2<>Burkholderia_mallei_NCTC_10229_chromosome_…	-	0	-	P18_yes_NC_002516|UD(5'(1-0)|3'(0-1)),THI_NC_002516|3'(0)	-	-	-
Burkholderia_383	|	Candidate_235_NC_007510	|	Bcep18194_A6248		putative transcriptional acitvator, Baf	*	>>>	119	|	3407136	3407207	<<<	71	|	0	>>>	Bcep18194_A6249	hypothetical protein	*	candidate	506	6.7e-17	X	2	RNA	Burkholderia_cenocepacia_AU_1054_chromosome_1<>Burkholderia_cenocepacia_HI2424_chromosome_1	-	1	Candidate_288_NC_007510(para)	P34_yes_NC_002516|3'(0)	-	-	-
Burkholderia_383	|	Candidate_240_NC_007510	|	Bcep18194_A6274		hypothetical protein	*	>>>	96	|	3436424	3436717	>>>	293	|	14	>>>	Bcep18194_A6275	adenosylmethionine--8-amino-7-oxononanoate	*	candidate	847	6.5e-33	Y	4	RNA	Burkholderia_cenocepacia_AU_1054_chromosome_1<>Burkholderia_cepacia_AMMD_chromosome_1<>Burkholderia_cenocepacia_HI2424_chromosome_1<>Burkholderia_vietnamiensis_G4_chromosome_1	-	0	-	P15_yes_NC_002516|3'(0),P36_yes_NC_002516|3'(0),SRP_bact_NC_003047|3'(0)	5	-	-
Burkholderia_383	|	Candidate_246_NC_007510	|	Bcep18194_A6352		Glutathione reductase	*	<<<	89	|	3519077	3519231	<<<	154	|	0	<<<	Bcep18194_A6353	hypothetical protein	*	candidate	822	8.6e-32	Z	4	RNA	Burkholderia_cenocepacia_AU_1054_chromosome_1<>Burkholderia_cepacia_AMMD_chromosome_1<>Burkholderia_cenocepacia_HI2424_chromosome_1<>Burkholderia_vietnamiensis_G4_chromosome_1	-	0	-	P20_yes_NC_002516|3'(0),Cobalamin4_NC_002516|3'(0)	-	-	-
Burkholderia_383	|	Candidate_252_NC_007510	|	Bcep18194_A6371		Flagellar basal-body rod protein FlgB	*	<<<	1	|	3537820	3537885	>>>	65	|	137	>>>	Bcep18194_A6372	Flageller protein FlgA	*	candidate	805	2e-30	F	4	-	Burkholderia_cenocepacia_AU_1054_chromosome_1<>Burkholderia_cepacia_AMMD_chromosome_1<>Burkholderia_cenocepacia_HI2424_chromosome_1<>Burkholderia_vietnamiensis_G4_chromosome_1	-	0	-	P20_yes_NC_002516|3'(0),Cobalamin1_NC_002516|3'(0),SRP_bact_NC_003047|3'(0)	-	-	-
Burkholderia_383	|	Candidate_258_NC_007510	|	Bcep18194_A6412		Flagellar hook-basal body complex protein FliE	*	<<<	17	|	3580243	3580373	>>>	130	|	101	>>>	Bcep18194_A6413	Flagellar FliF M-ring protein	*	candidate	1057	7.2e-42	F	11	-	Burkholderia_mallei_ATCC_23344_chromosome_1<>Burkholderia_pseudomallei_K96243_chromosome_1<>Burkholderia_cenocepacia_AU_1054_chromosome_1<>Burkholderia_cepacia_AMMD_chromosome_1<>Burkholderia_cenocepacia_HI2424_chromosome_1<>Burkholderia_mallei_SAVP1_chromosome_2<>Burkholderia_mallei_NCTC_10229_chromosome_2<>Burkholderia_pseudomallei_668_chromosome_1<>Burkholderia_pseudomallei_1106a_chromosome_1<…	-	0	-	Cobalamin1_NC_002516|3'(0)	-	-	-
Burkholderia_383	|	Candidate_265_NC_007510	|	Bcep18194_A3507		ABC transporter, fused ATPase and inner membrane	*	<<<	350	|	377484	377605	>>>	121	|	146	>>>	Bcep18194_A3508	FAD dependent oxidoreductase	*	candidate	539	1.5e-18	F	9	RNA	Burkholderia_mallei_ATCC_23344_chromosome_1<>Burkholderia_pseudomallei_K96243_chromosome_1<>Burkholderia_pseudomallei_1710b_chromosome_1<>Burkholderia_thailandensis_E264_chromosome_1<>Burkholderia_xenovorans_LB400_chromosome_1<>Burkholderia_cenocepacia_AU_1054_chromosome_1<>Burkholderia_cepacia_AMMD_chromosome_1<>Burkholderia_cenocepacia_HI2424_chromosome_1<>Burkholderia_vietnamiensis_G4_chromoso…	-	0	-	Cobalamin1_NC_002516|3'(0)	-	-	-
Burkholderia_383	|	Candidate_267_NC_007510	|	Bcep18194_A3213		Site-specific DNA-methyltransferase	*	<<<	244	|	47125	47211	<<<	86	|	6	<<<	Bcep18194_A3214	outer membrane protein (porin)-like	*	candidate	480	5.4e-16	Y	1	-	Burkholderia_cepacia_AMMD_chromosome_1	-	0	-	THI_NC_002516|3'(0),Cobalamin1_NC_002516|3'(0),P20_yes_NC_002516|3'(0)	-	-	-
Burkholderia_383	|	Candidate_291_NC_007510	|	Bcep18194_A3826		3-deoxy-7-phosphoheptulonate synthase	*	<<<	136	|	727646	727901	<<<	255	|	10	<<<	Bcep18194_A3827	Peptidase U62, modulator of DNA gyrase	*	candidate	610	6.9e-22	Z	7	RNA	Burkholderia_pseudomallei_K96243_chromosome_1<>Burkholderia_pseudomallei_1710b_chromosome_1<>Burkholderia_thailandensis_E264_chromosome_1<>Burkholderia_xenovorans_LB400_chromosome_1<>Burkholderia_cenocepacia_AU_1054_chromosome_1<>Burkholderia_cenocepacia_HI2424_chromosome_1<>Burkholderia_vietnamiensis_G4_chromosome_1	-	0	Candidate_292_NC_007510(anti)	P15_yes_NC_002516|3'(0)	-	-	-E.coli_sig70_2(7.4|-163)
Burkholderia_383	|	Candidate_297_NC_007510	|	Bcep18194_A3245		Lytic transglycosylase	*	>>>	3	|	77937	78067	>>>	130	|	24	>>>	Bcep18194_A3246	Cobalamin synthesis protein/P47K	*	candidate	555	5.2e-19	F	1	-	Burkholderia_cenocepacia_HI2424_chromosome_1	-	0	-	Cobalamin3_NC_002516|3'(0)	5	-	-
Burkholderia_383	|	Candidate_308_NC_007510	|	Bcep18194_A4070		glucose-6-phosphate 1-dehydrogenase	*	<<<	366	|	998093	998156	<<<	63	|	0	>>>	Bcep18194_A4071	ABC sugar transporter, periplasmic ligand	*	candidate	1900	3.3e-80	F	10	-	Burkholderia_mallei_ATCC_23344_chromosome_1<>Burkholderia_pseudomallei_K96243_chromosome_1<>Burkholderia_pseudomallei_1710b_chromosome_1<>Burkholderia_cenocepacia_AU_1054_chromosome_1<>Burkholderia_cepacia_AMMD_chromosome_1<>Burkholderia_cenocepacia_HI2424_chromosome_1<>Burkholderia_mallei_NCTC_10229_chromosome_2<>Burkholderia_pseudomallei_668_chromosome_1<>Burkholderia_pseudomallei_1106a_chromos…	-	0	-	P20_yes_NC_002516|3'(0)	-	-	-
Burkholderia_383	|	Candidate_2_NC_007511	|	Bcep18194_B0780		Amino acid transporter	*	<<<	1	|	887108	887186	>>>	78	|	280	>>>	Bcep18194_B0781	2-nitropropane dioxygenase, NPD	*	candidate	645	1.4e-23	R	2	-	Burkholderia_cepacia_AMMD_chromosome_2<>Burkholderia_vietnamiensis_G4_chromosome_2	-	0	-	Cobalamin1_NC_002516|3'(0)	-	-	-
Burkholderia_383	|	Candidate_8_NC_007511	|	Bcep18194_B0159		hypothetical protein	*	>>>	116	|	176222	176281	<<<	59	|	312	>>>	Bcep18194_B0161	GCN5-related N-acetyltransferase	*	candidate	674	1.9e-24	R	2	-	Burkholderia_cenocepacia_AU_1054_chromosome_2<>Burkholderia_cenocepacia_HI2424_chromosome_2	-	0	-	P15_yes_NC_002516|UD(5'(1-0)|3'(0-1))	-	-	-
Burkholderia_383	|	Candidate_13_NC_007511	|	Bcep18194_B1342		hypothetical protein	*	>>>	2	|	1525121	1525251	>>>	130	|	14	>>>	Bcep18194_B1343	Major facilitator superfamily (MFS_1)	*	candidate	610	1.8e-21	T	2	RNA	Burkholderia_cepacia_AMMD_chromosome_2<>Burkholderia_vietnamiensis_G4_chromosome_2	-	0	-	P11_yes_NC_002516|UD(5'(1-0)|3'(1-0))	5	-	-Multi_s54(11.58|-136)
Burkholderia_383	|	Candidate_14_NC_007511	|	Bcep18194_B1600		Succinate-semialdehyde dehydrogenase (NAD(P)+)	*	<<<	64	|	1822448	1822535	<<<	87	|	0	<<<	Bcep18194_B1601	Cytochrome c, class I	*	candidate	514	3.5e-17	T	2	RNA	Burkholderia_cenocepacia_AU_1054_chromosome_2<>Burkholderia_cenocepacia_HI2424_chromosome_2	-	0	-	P15_yes_NC_002516|UD(5'(1-0)|3'(0-1))	-	-	-
Burkholderia_383	|	Candidate_16_NC_007511	|	Bcep18194_B1712		transcriptional regulator, IclR family	*	>>>	383	|	1946598	1946889	<<<	291	|	137	<<<	Bcep18194_B1713	transcriptional regulator, AsnC family	*	candidate	1018	1.4e-40	T	2	-	Burkholderia_cenocepacia_HI2424_chromosome_2<>Burkholderia_vietnamiensis_G4_chromosome_2	-	0	-	Cobalamin4_NC_002516|3'(0),P30_yes_NC_002516|3'(0)	-	-	-
Burkholderia_383	|	Candidate_22_NC_007511	|	Bcep18194_B2302		Cl- channel, voltage gated	*	<<<	22	|	2629149	2629353	<<<	204	|	26	<<<	Bcep18194_B2303	chemotaxis-specific methylesterase	*	candidate	942	1e-36	T	4	-	Burkholderia_cenocepacia_AU_1054_chromosome_2<>Burkholderia_cepacia_AMMD_chromosome_2<>Burkholderia_cenocepacia_HI2424_chromosome_2<>Burkholderia_vietnamiensis_G4_chromosome_2	-	0	-	Cobalamin1_NC_002516|3'(0)	5	-	-
Burkholderia_383	|	Candidate_40_NC_007511	|	Bcep18194_B1157		Drug resistance transporter EmrB/QacA subfamily	*	<<<	16	|	1300764	1300961	>>>	197	|	16	>>>	Bcep18194_B1158	methyl-accepting chemotaxis sensory transducer	*	candidate	789	9.9e-30	X	4	-	Burkholderia_cenocepacia_AU_1054_chromosome_2<>Burkholderia_cepacia_AMMD_chromosome_2<>Burkholderia_cenocepacia_HI2424_chromosome_2<>Burkholderia_vietnamiensis_G4_chromosome_2	-	0	-	sokB_NC_000913|3'(0)	5	-	-
Burkholderia_383	|	Candidate_45_NC_007511	|	Bcep18194_B0128		H+/gluconate symporter family protein	*	<<<	159	|	140540	140696	<<<	156	|	0	>>>	Bcep18194_B0129	sigma54 specific transcriptional regulator with	*	candidate	1080	4.8e-43	X	4	RNA	Burkholderia_cenocepacia_AU_1054_chromosome_2<>Burkholderia_cepacia_AMMD_chromosome_2<>Burkholderia_cenocepacia_HI2424_chromosome_2<>Burkholderia_vietnamiensis_G4_chromosome_2	-	0	-	SRP_bact_NC_003047|3'(0)	-	-	-
Burkholderia_383	|	Candidate_48_NC_007511	|	Bcep18194_B1333		Peptidase S1 and S6, chymotrypsin/Hap	*	>>>	2	|	1516366	1516556	>>>	190	|	-4	>>>	Bcep18194_B1334	Drug resistance transporter Bcr/CflA subfamily	*	candidate	507	5.1e-17	Z	3	-	Burkholderia_cenocepacia_AU_1054_chromosome_2<>Burkholderia_cenocepacia_HI2424_chromosome_2<>Burkholderia_vietnamiensis_G4_chromosome_2	-	0	-	P20_yes_NC_002516|3'(0),SRP_bact_NC_003047|3'(0)	5	-	-E.coli_sig70_3(7.99|-158)
Burkholderia_383	|	Candidate_49_NC_007511	|	Bcep18194_B1510		Short-chain dehydrogenase/reductase SDR	*	>>>	12	|	1699815	1699985	>>>	170	|	342	>>>	Bcep18194_B1511	phosphoenolpyruvate carboxykinase (GTP)	*	candidate	1711	7.9e-72	Z	3	RNA	Burkholderia_cenocepacia_AU_1054_chromosome_2<>Burkholderia_cepacia_AMMD_chromosome_2<>Burkholderia_vietnamiensis_G4_chromosome_2	-	1	Candidate_50_NC_007511(opp)	P26_yes_NC_002516|3'(0)	-	-	-
Burkholderia_383	|	Candidate_55_NC_007511	|	Bcep18194_B1600		Succinate-semialdehyde dehydrogenase (NAD(P)+)	*	<<<	22	|	1822406	1822535	<<<	129	|	0	<<<	Bcep18194_B1601	Cytochrome c, class I	*	candidate	514	3.5e-17	Y	2	RNA	Burkholderia_cenocepacia_AU_1054_chromosome_2<>Burkholderia_cenocepacia_HI2424_chromosome_2	-	0	-	P15_yes_NC_002516|UD(5'(1-0)|3'(0-1))	5	-	-
Burkholderia_383	|	Candidate_56_NC_007511	|	Bcep18194_B1659		Peptidoglycan glycosyltransferase	*	<<<	81	|	1888838	1888930	<<<	92	|	0	<<<	Bcep18194_B1660	Proline racemase	*	candidate	500	1.2e-16	Y	2	-	Burkholderia_cenocepacia_AU_1054_chromosome_2<>Burkholderia_cenocepacia_HI2424_chromosome_2	-	0	-	Cobalamin2_NC_002516|3'(0),P20_yes_NC_002516|3'(0)	-	-	-
Burkholderia_383	|	Candidate_58_NC_007511	|	Bcep18194_B1678		Cl- channel, voltage gated	*	<<<	18	|	1908016	1908162	<<<	146	|	460	>>>	Bcep18194_B1679	outer membrane protein (porin)	*	candidate	524	1.2e-17	X	2	-	Burkholderia_cenocepacia_AU_1054_chromosome_2<>Burkholderia_cenocepacia_HI2424_chromosome_2	-	1	Candidate_59_NC_007511(opp)	Cobalamin1_NC_002516|3'(0),Cobalamin2_NC_002516|3'(0)	5	-	-
Burkholderia_383	|	Candidate_61_NC_007511	|	Bcep18194_B1749		Squalene/phytoene synthase	*	<<<	7	|	1989702	1990044	<<<	342	|	24	>>>	Bcep18194_B1750	Glycerophosphoryl diester phosphodiesterase	*	candidate	850	1e-32	F	3	RNA	Burkholderia_cenocepacia_AU_1054_chromosome_2<>Burkholderia_cepacia_AMMD_chromosome_2<>Burkholderia_cenocepacia_HI2424_chromosome_2	-	1	Candidate_87_NC_007511(para)	Cobalamin1_NC_002516|3'(0)	5	RS	-
Burkholderia_383	|	Candidate_65_NC_007511	|	Bcep18194_B1902		sigma 38 (RpoS)	*	>>>	116	|	2179171	2179235	<<<	64	|	0	>>>	Bcep18194_B1903	DNA polymerase IV (family X)-like	*	candidate	665	4.7e-24	F	2	RNA	Burkholderia_cenocepacia_AU_1054_chromosome_2<>Burkholderia_cenocepacia_HI2424_chromosome_2	-	0	-	P15_yes_NC_002516|3'(0),Cobalamin2_NC_002516|3'(0)	-	-	-
Burkholderia_383	|	Candidate_71_NC_007511	|	Bcep18194_B2105		Streptomycin 3''-adenylyltransferase	*	<<<	194	|	2412359	2412443	<<<	84	|	0	<<<	Bcep18194_B2106	Histone-like DNA-binding protein	*	candidate	576	6.8e-20	Z	2	RNA	Burkholderia_cenocepacia_AU_1054_chromosome_2<>Burkholderia_cenocepacia_HI2424_chromosome_2	-	0	-	SRP_bact_NC_003047|3'(0)	-	-	-
Burkholderia_383	|	Candidate_76_NC_007511	|	Bcep18194_B2199		Pseudomonalisin	*	>>>	1	|	2518061	2518168	>>>	107	|	342	>>>	Bcep18194_B2200	hypothetical protein	*	candidate	1297	5.4e-53	Y	2	-	Burkholderia_cenocepacia_AU_1054_chromosome_2<>Burkholderia_cenocepacia_HI2424_chromosome_2	-	0	-	Cobalamin2_NC_002516|3'(0),Cobalamin1_NC_002516|3'(0)	-	-	-
Burkholderia_383	|	Candidate_84_NC_007511	|	Bcep18194_B2299		ABC efflux pump, fused ATPase and inner membrane	*	>>>	1	|	2626282	2626385	>>>	103	|	103	>>>	Bcep18194_B2300	riboflavin synthase subunit alpha	*	candidate	497	1.5e-16	Z	1	RNA	Burkholderia_cepacia_AMMD_chromosome_2	-	0	-	RFN_NC_002516|3'(0)	-	-	-
Burkholderia_383	|	Candidate_87_NC_007511	|	Bcep18194_B2310		Na+/H+ antiporter	*	<<<	163	|	2640538	2640604	<<<	66	|	12	<<<	Bcep18194_B2311	Aldehyde dehydrogenase	*	candidate	565	1.1e-19	Y	3	RNA	Burkholderia_cenocepacia_AU_1054_chromosome_2<>Burkholderia_cepacia_AMMD_chromosome_2<>Burkholderia_cenocepacia_HI2424_chromosome_2	-	1	Candidate_61_NC_007511(para)	SRP_bact_NC_003047|3'(0)	3	-	-
Burkholderia_383	|	Candidate_92_NC_007511	|	Bcep18194_B2436		TonB-dependent siderophore receptor	*	<<<	23	|	2776799	2777161	>>>	362	|	217	<<<	Bcep18194_B2437	hypothetical protein	*	candidate	1101	3.7e-44	F	2	-	Burkholderia_cepacia_AMMD_chromosome_2<>Burkholderia_vietnamiensis_G4_chromosome_2	-	0	-	yybP1ykoY_NC_002516|UD(5'(0-0)|3'(1-1))	-	-	-
Burkholderia_383	|	Candidate_93_NC_007511	|	Bcep18194_B0267		methyl-accepting chemotaxis sensory transducer	*	>>>	9	|	285371	285438	>>>	67	|	336	>>>	Bcep18194_B0268	methyl-accepting chemotaxis sensory transducer	*	candidate	1024	1.3e-40	F	2	-	Burkholderia_cenocepacia_AU_1054_chromosome_2<>Burkholderia_cenocepacia_HI2424_chromosome_2	-	0	-	Cobalamin1_NC_002516|3'(0)	-	-	-
Burkholderia_383	|	Candidate_97_NC_007511	|	Bcep18194_B2907		Alpha-1,2-mannosidase, putative	*	<<<	144	|	3290462	3290620	<<<	158	|	24	<<<	Bcep18194_B2908	hypothetical protein	*	candidate	996	2.9e-39	Z	1	RNA	Burkholderia_cenocepacia_AU_1054_chromosome_2	-	0	-	Cobalamin1_NC_002516|3'(0)	-	-	-
Burkholderia_383	|	Candidate_105_NC_007511	|	Bcep18194_B0343		4-hydroxyphenylpyruvate dioxygenase	*	<<<	146	|	368272	368378	<<<	106	|	4	>>>	Bcep18194_B0344	3-dehydroquinate dehydratase	*	candidate	827	1.6e-31	F	4	-	Burkholderia_cenocepacia_AU_1054_chromosome_2<>Burkholderia_cepacia_AMMD_chromosome_2<>Burkholderia_cenocepacia_HI2424_chromosome_2<>Burkholderia_vietnamiensis_G4_chromosome_2	-	0	Candidate_106_NC_007511(anti)	P20_yes_NC_002516|3'(0)	-	-	-
Burkholderia_383	|	Candidate_110_NC_007511	|	Bcep18194_B0484		transcriptional regulator, AraC family	*	<<<	79	|	541036	541181	>>>	145	|	75	>>>	Bcep18194_B0485	Iron-sulfur-dependent L-serine dehydratase	*	candidate	870	1.7e-33	F	7	-	Ralstonia_solanacearum_chromosome<>Ralstonia_solanacearum_plasmid_pGMI1000MP<>Burkholderia_pseudomallei_K96243_chromosome_2<>Ralstonia_eutropha_JMP134_chromosome_2<>Burkholderia_cepacia_AMMD_chromosome_2<>Burkholderia_cenocepacia_HI2424_chromosome_2<>Burkholderia_vietnamiensis_G4_chromosome_2	-	0	Candidate_109_NC_007511(anti)	Cobalamin1_NC_002516|UD(5'(0-0)|3'(0-0))	5	-	-
Burkholderia_383	|	Candidate_115_NC_007511	|	Bcep18194_B0066		outer membrane lipoprotein	*	<<<	1	|	75461	75700	>>>	239	|	223	>>>	Bcep18194_B0067	cytosine deaminase	*	candidate	1526	2.4e-63	F	3	RNA	Burkholderia_cenocepacia_AU_1054_chromosome_2<>Burkholderia_cepacia_AMMD_chromosome_2<>Burkholderia_cenocepacia_HI2424_chromosome_2	-	1	Candidate_73_NC_007511(para)	SRP_bact_NC_003047|3'(0),P20_yes_NC_002516|3'(0)	-	-	-
Burkholderia_383	|	Candidate_119_NC_007511	|	Bcep18194_B0755		Patatin	*	<<<	2	|	854298	854427	>>>	129	|	138	>>>	Bcep18194_B0756	Cell shape determining protein MreB/Mrl	*	candidate	790	7.1e-30	F	4	-	Burkholderia_cenocepacia_AU_1054_chromosome_2<>Burkholderia_cepacia_AMMD_chromosome_2<>Burkholderia_cenocepacia_HI2424_chromosome_2<>Burkholderia_vietnamiensis_G4_chromosome_2	-	0	-	P20_yes_NC_002516|3'(0)	-	-	-
Burkholderia_383	|	Candidate_120_NC_007511	|	Bcep18194_B0757		protein of unknown function DUF218	*	>>>	295	|	856782	857002	>>>	220	|	-4	>>>	Bcep18194_B0758	outer membrane autotransporter barrel	*	candidate	657	5.4e-24	F	1	-	Burkholderia_cenocepacia_HI2424_chromosome_2	-	0	-	P26_yes_NC_002516|3'(0),P20_yes_NC_002516|3'(0),P34_yes_NC_002516|3'(0),Cobalamin1_NC_002516|3'(0),P11_yes_NC_002516|3'(0),Cobalamin2_NC_002516|3'(0),SRP_bact_NC_003047|3'(0)	5	-	-
Burkholderia_cenocepacia_AU_1054	|	Candidate_3_NC_008060	|	Bcen_0733		protein of unknown function DUF893, YccS/YhfK	*	<<<	1	|	794081	794196	>>>	115	|	62	>>>	Bcen_0734	exodeoxyribonuclease V, gamma subunit	*	candidate	553	5.4e-19	R	3	-	Burkholderia_383_chromosome_1<>Burkholderia_cepacia_AMMD_chromosome_1<>Burkholderia_vietnamiensis_G4_chromosome_1	-	0	-	Cobalamin4_NC_002516|UD(5'(0-1)|3'(0-0)),Cobalamin1_NC_002516|3'(0),P20_yes_NC_002516|3'(0),Cobalamin2_NC_002516|3'(0),P26_yes_NC_002516|3'(0),SRP_bact_NC_003047|3'(0),P15_yes_NC_002516|3'(0),P36_yes_NC_002516|3'(0)	5	-	-
Burkholderia_cenocepacia_AU_1054	|	Candidate_16_NC_008060	|	Bcen_1828		surface antigen (D15)	*	<<<	41	|	2029777	2029984	<<<	207	|	0	>>>	Bcen_1829	hypothetical protein	*	candidate	621	3.4e-22	R	1	RNA	Burkholderia_vietnamiensis_G4_chromosome_1	-	1	Candidate_8_NC_008060(para)	SRP_bact_NC_003047|3'(0)	-	RS	-
Burkholderia_cenocepacia_AU_1054	|	Candidate_18_NC_008060	|	Bcen_0268		Chaperone DnaK	*	>>>	27	|	294358	294467	>>>	109	|	119	>>>	Bcen_0269	Chaperone DnaJ	*	candidate	505	5.4e-17	T	4	RNA	Burkholderia_383_chromosome_1<>Burkholderia_thailandensis_E264_chromosome_1<>Burkholderia_cepacia_AMMD_chromosome_1<>Burkholderia_vietnamiensis_G4_chromosome_1	-	0	-	tpke11_NC_000913|UD(5'(0-0)|3'(0-0))	-	-	-
Burkholderia_cenocepacia_AU_1054	|	Candidate_31_NC_008060	|	Bcen_1399		transcriptional regulator, GntR family	*	<<<	246	|	1539814	1539927	<<<	113	|	19	<<<	Bcen_1400	hypothetical protein	*	candidate	1252	6.6e-51	T	2	-	Burkholderia_383_chromosome_3<>Burkholderia_cepacia_AMMD_chromosome_3	-	1	Candidate_107_NC_008060(para)	P20_yes_NC_002516|3'(0)	-	-	-
Burkholderia_cenocepacia_AU_1054	|	Candidate_32_NC_008060	|	Bcen_1405		hypothetical protein	*	>>>	4	|	1544288	1544594	>>>	306	|	325	>>>	Bcen_1406	ATPase AAA-2	*	candidate	581	1.1e-20	T	3	RNA	Burkholderia_pseudomallei_1710b_chromosome_2<>Burkholderia_383_chromosome_3<>Burkholderia_cepacia_AMMD_chromosome_3	-	0	-	RyfD_NC_000913|3'(0),THI_NC_002516|3'(0),SRP_bact_NC_003047|3'(0),P34_yes_NC_002516|3'(0)	-	-	-
Burkholderia_cenocepacia_AU_1054	|	Candidate_40_NC_008060	|	Bcen_2316		dienelactone hydrolase and related enzymes-like	*	>>>	134	|	2556507	2556657	>>>	150	|	197	>>>	Bcen_2317	adenosylmethionine-8-amino-7-oxononanoate	*	candidate	842	1.1e-32	T	3	-	Burkholderia_383_chromosome_1<>Burkholderia_cepacia_AMMD_chromosome_1<>Burkholderia_vietnamiensis_G4_chromosome_1	-	0	-	Cobalamin1_NC_002516|UD(5'(0-0)|3'(1-0)),P36_yes_NC_002516|3'(0),Cobalamin4_NC_002516|3'(0),SRP_bact_NC_003047|3'(0)	-	-	-
Burkholderia_cenocepacia_AU_1054	|	Candidate_42_NC_008060	|	Bcen_2438		Endonuclease/exonuclease/phosphatase	*	>>>	69	|	2684086	2684242	>>>	156	|	54	>>>	Bcen_2439	Ferredoxin--NADP(+) reductase	*	candidate	662	5.5e-24	T	12	RNA	Burkholderia_mallei_ATCC_23344_chromosome_1<>Burkholderia_pseudomallei_K96243_chromosome_1<>Burkholderia_pseudomallei_1710b_chromosome_1<>Burkholderia_383_chromosome_1<>Burkholderia_thailandensis_E264_chromosome_1<>Burkholderia_cepacia_AMMD_chromosome_1<>Burkholderia_mallei_SAVP1_chromosome_2<>Burkholderia_mallei_NCTC_10229_chromosome_2<>Burkholderia_pseudomallei_668_chromosome_1<>Burkholderia_ps…	-	0	-	Cobalamin1_NC_002516|UD(5'(0-0)|3'(1-0))	5	-	-
Burkholderia_cenocepacia_AU_1054	|	Candidate_43_NC_008060	|	Bcen_2509		sun protein	*	<<<	154	|	2756768	2756841	<<<	73	|	2	<<<	Bcen_2510	peptidase M48, Ste24p	*	candidate	803	2.1e-30	T	1	RNA	Burkholderia_383_chromosome_1	-	0	-	Cobalamin1_NC_002516|3'(0),SRP_bact_NC_003047|3'(0)	3	-	-
Burkholderia_cenocepacia_AU_1054	|	Candidate_46_NC_008060	|	Bcen_2780		Phenylacetate-CoA oxygenase/reductase, PaaK	*	>>>	1	|	3055532	3055641	>>>	109	|	18	>>>	Bcen_2781	hypothetical protein	*	candidate	555	6.1e-19	T	3	RNA	Burkholderia_383_chromosome_1<>Burkholderia_cepacia_AMMD_chromosome_1<>Burkholderia_vietnamiensis_G4_chromosome_1	-	0	-	P15_yes_NC_002516|3'(0)	5	-	-
Burkholderia_cenocepacia_AU_1054	|	Candidate_47_NC_008060	|	Bcen_0962		major facilitator superfamily MFS_1	*	<<<	1	|	1053475	1053709	>>>	234	|	169	>>>	Bcen_0963	methyl-accepting chemotaxis sensory transducer	*	candidate	1142	6e-46	X	3	RNA	Burkholderia_383_chromosome_1<>Burkholderia_cepacia_AMMD_chromosome_1<>Burkholderia_vietnamiensis_G4_chromosome_1	-	0	-	sokB_NC_000913|3'(0),Cobalamin1_NC_002516|3'(0)	-	-	-
Burkholderia_cenocepacia_AU_1054	|	Candidate_58_NC_008060	|	Bcen_1027		GTP-binding protein TypA	*	>>>	24	|	1120794	1121086	<<<	292	|	0	>>>	Bcen_1028	2-oxoglutarate dehydrogenase, E1 component	*	candidate	1345	5.2e-55	X	3	RNA	Burkholderia_383_chromosome_1<>Burkholderia_cepacia_AMMD_chromosome_1<>Burkholderia_vietnamiensis_G4_chromosome_1	-	0	-	P30_yes_NC_002516|3'(0)	-	-	-
Burkholderia_cenocepacia_AU_1054	|	Candidate_59_NC_008060	|	Bcen_1027		GTP-binding protein TypA	*	>>>	118	|	1120888	1121086	<<<	198	|	0	>>>	Bcen_1028	2-oxoglutarate dehydrogenase, E1 component	*	candidate	1345	5.2e-55	F	13	-	Burkholderia_mallei_ATCC_23344_chromosome_1<>Burkholderia_pseudomallei_K96243_chromosome_1<>Burkholderia_pseudomallei_1710b_chromosome_1<>Burkholderia_383_chromosome_1<>Burkholderia_thailandensis_E264_chromosome_1<>Burkholderia_xenovorans_LB400_chromosome_1<>Burkholderia_cepacia_AMMD_chromosome_1<>Burkholderia_mallei_SAVP1_chromosome_2<>Burkholderia_mallei_NCTC_10229_chromosome_2<>Burkholderia_ps…	-	0	-	P30_yes_NC_002516|3'(0)	-	-	-
Burkholderia_cenocepacia_AU_1054	|	Candidate_61_NC_008060	|	Bcen_0111		N-acetylmuramyl-L-alanine amidase, negative	*	>>>	48	|	115760	116120	>>>	360	|	43	>>>	Bcen_0112	Ribonucleoside-diphosphate reductase, alpha	*	candidate	1717	5.6e-72	F	7	-	Burkholderia_mallei_ATCC_23344_chromosome_1<>Burkholderia_pseudomallei_K96243_chromosome_1<>Burkholderia_pseudomallei_1710b_chromosome_1<>Burkholderia_383_chromosome_1<>Burkholderia_thailandensis_E264_chromosome_1<>Burkholderia_cepacia_AMMD_chromosome_1<>Burkholderia_vietnamiensis_G4_chromosome_1	-	0	Candidate_60_NC_008060(anti)	Cobalamin2_NC_002516|3'(0),Cobalamin1_NC_002516|3'(0)	5	-	-
Burkholderia_cenocepacia_AU_1054	|	Candidate_62_NC_008060	|	Bcen_1064		ROK domain protein	*	<<<	254	|	1164388	1164576	<<<	188	|	4	<<<	trRNA	trRNA	*	candidate	247	5.5e-24	Z	2	RNA	Burkholderia_383_chromosome_1<>Burkholderia_cepacia_AMMD_chromosome_1	-	0	-	P15_yes_NC_002516|3'(0)	-	-	-E.coli_sig70_1(10.5|-311)
Burkholderia_cenocepacia_AU_1054	|	Candidate_63_NC_008060	|	trRNA		trRNA	*	<<<	1	|	1166393	1166521	>>>	128	|	119	>>>	Bcen_1066	Ribonuclease R	*	candidate	1031	1e-40	F	3	-	Burkholderia_383_chromosome_1<>Burkholderia_cepacia_AMMD_chromosome_1<>Burkholderia_vietnamiensis_G4_chromosome_1	-	0	-	P20_yes_NC_002516|3'(0),Cobalamin2_NC_002516|3'(0)	-	-	-
Burkholderia_cenocepacia_AU_1054	|	Candidate_74_NC_008060	|	Bcen_1159		Cyclic peptide transporter	*	<<<	57	|	1263423	1263517	<<<	94	|	0	>>>	Bcen_1160	Amino acid adenylation	*	candidate	575	3.6e-20	F	2	RNA	Burkholderia_383_chromosome_1<>Burkholderia_cepacia_AMMD_chromosome_1	-	0	-	Cobalamin3_NC_002516|UD(5'(0-0)|3'(0-1)),P15_yes_NC_002516|UD(5'(0-0)|3'(0-1)),P30_yes_NC_002516|UD(5'(1-1)|3'(0-0)),P20_yes_NC_002516|3'(0)	-	-	-
Burkholderia_cenocepacia_AU_1054	|	Candidate_81_NC_008060	|	Bcen_1479		transcriptional regulator, winged helix family	*	<<<	145	|	1643768	1644020	<<<	252	|	0	>>>	Bcen_1480	transcriptional regulator, AraC family	*	candidate	989	4.9e-39	F	1	RNA	Burkholderia_vietnamiensis_G4_chromosome_3	-	0	-	Cobalamin3_NC_002516|3'(0),THI_NC_002516|3'(0)	-	-	-
Burkholderia_cenocepacia_AU_1054	|	Candidate_82_NC_008060	|	Bcen_1555		acyl-CoA dehydrogenase-like	*	<<<	135	|	1729687	1729759	<<<	72	|	195	<<<	Bcen_1556	transcriptional regulator, AraC family	*	candidate	521	5.6e-18	F	1	COD	Burkholderia_cepacia_AMMD_chromosome_3	-	0	-	Cobalamin1_NC_002516|3'(0)	-	-	-
Burkholderia_cenocepacia_AU_1054	|	Candidate_89_NC_008060	|	Bcen_1654		acetolactate synthase, large subunit,	*	<<<	175	|	1836137	1836229	<<<	92	|	87	>>>	Bcen_1655	RNA polymerase, sigma-24 subunit, ECF subfamily	*	candidate	860	3.3e-33	F	10	RNA	Burkholderia_pseudomallei_K96243_chromosome_1<>Burkholderia_pseudomallei_1710b_chromosome_1<>Burkholderia_383_chromosome_1<>Burkholderia_thailandensis_E264_chromosome_1<>Burkholderia_xenovorans_LB400_chromosome_1<>Burkholderia_cepacia_AMMD_chromosome_1<>Burkholderia_mallei_SAVP1_chromosome_2<>Burkholderia_mallei_NCTC_10229_chromosome_2<>Burkholderia_mallei_NCTC_10247_chromosome_2<>Burkholderia_vi…	-	0	-	T1box11_NC_000964|3'(0)	-	-	-
Burkholderia_cenocepacia_AU_1054	|	Candidate_91_NC_008060	|	Bcen_1673		osmosensitive K+ channel signal transduction	*	<<<	62	|	1855829	1855914	<<<	85	|	5	<<<	Bcen_1674	potassium-transporting ATPase, C subunit	*	candidate	513	4.3e-17	X	1	RNA	Burkholderia_cepacia_AMMD_chromosome_1	-	0	-	P30_yes_NC_002516|UD(5'(1-1)|3'(0-0)),P20_yes_NC_002516|3'(0),Cobalamin2_NC_002516|3'(0),Cobalamin1_NC_002516|3'(0),SRP_bact_NC_003047|3'(0)	-	-	-
Burkholderia_cenocepacia_AU_1054	|	Candidate_102_NC_008060	|	Bcen_1817		transposase IS116/IS110/IS902	*	<<<	1	|	2012004	2012101	>>>	97	|	205	>>>	Bcen_1818	argininosuccinate lyase	*	candidate	536	7.8e-19	F	10	-	Burkholderia_mallei_ATCC_23344_chromosome_1<>Burkholderia_pseudomallei_K96243_chromosome_1<>Burkholderia_pseudomallei_1710b_chromosome_1<>Acidovorax_JS42_chromosome<>Burkholderia_mallei_SAVP1_chromosome_2<>Verminephrobacter_eiseniae_EF01-2_chromosome<>Burkholderia_mallei_NCTC_10229_chromosome_2<>Burkholderia_pseudomallei_668_chromosome_1<>Burkholderia_pseudomallei_1106a_chromosome_1<>Burkholderia…	-	1	Candidate_156_NC_008060(para)	oxyS_NC_000913|3'(0),P20_yes_NC_002516|3'(0)	-	-	-
Burkholderia_cenocepacia_AU_1054	|	Candidate_109_NC_008060	|	trRNA		trRNA	*	>>>	34	|	2065484	2065536	>>>	52	|	264	<<<	Bcen_1867	transcriptional regulator, LysR family	*	candidate	724	5.6e-27	Y	2	-	Burkholderia_383_chromosome_1<>Burkholderia_cepacia_AMMD_chromosome_1	-	2	Candidate_255_NC_008060(para),Candidate_144_NC_008060(para)	Cobalamin1_NC_002516|3'(0)	-	-	-
Burkholderia_cenocepacia_AU_1054	|	Candidate_115_NC_008060	|	Bcen_1892		ribosomal protein L33	*	>>>	7	|	2087460	2087517	>>>	57	|	111	>>>	Bcen_1893	L-aspartate oxidase	*	candidate	590	1.2e-20	Z	1	RNA	Burkholderia_vietnamiensis_G4_chromosome_1	-	0	Candidate_114_NC_008060(anti)	P30_yes_NC_002516|3'(0)	-	-	-
Burkholderia_cenocepacia_AU_1054	|	Candidate_118_NC_008060	|	Bcen_1909		cold-shock DNA-binding domain protein	*	>>>	1	|	2108527	2108619	>>>	92	|	87	<<<	Bcen_1910	multicopper oxidase, type 3	*	candidate	509	5.3e-17	Y	3	RNA	Burkholderia_383_chromosome_1<>Burkholderia_cepacia_AMMD_chromosome_1<>Burkholderia_vietnamiensis_G4_chromosome_1	-	0	Candidate_36_NC_008060(anti)	P20_yes_NC_002516|3'(0)	-	-	-
Burkholderia_cenocepacia_AU_1054	|	Candidate_119_NC_008060	|	Bcen_1910		multicopper oxidase, type 3	*	<<<	76	|	2110391	2110691	<<<	300	|	0	<<<	Bcen_1911	hypothetical protein	*	candidate	583	6.1e-21	Z	3	RNA	Burkholderia_383_chromosome_1<>Burkholderia_cepacia_AMMD_chromosome_1<>Burkholderia_vietnamiensis_G4_chromosome_1	-	0	-	P20_yes_NC_002516|3'(0),SRP_bact_NC_003047|3'(0)	-	-	-
Burkholderia_cenocepacia_AU_1054	|	Candidate_124_NC_008060	|	Bcen_1938		integral membrane protein MviN	*	<<<	-42	|	2143119	2143228	<<<	109	|	147	>>>	Bcen_1939	ribosomal protein S20	*	candidate	221	6.1e-26	F	7	-	Burkholderia_mallei_ATCC_23344_chromosome_1<>Burkholderia_pseudomallei_K96243_chromosome_1<>Burkholderia_383_chromosome_1<>Burkholderia_thailandensis_E264_chromosome_1<>Burkholderia_cepacia_AMMD_chromosome_1<>Burkholderia_mallei_SAVP1_chromosome_2<>Burkholderia_vietnamiensis_G4_chromosome_1	-	1	Candidate_125_NC_008060(tandem)	P20_yes_NC_002516|3'(0)	5	-	-
Burkholderia_cenocepacia_AU_1054	|	Candidate_125_NC_008060	|	Bcen_1938		integral membrane protein MviN	*	<<<	152	|	2143313	2143375	<<<	62	|	0	>>>	Bcen_1939	ribosomal protein S20	*	candidate	939	1.2e-36	F	12	-	Burkholderia_mallei_ATCC_23344_chromosome_1<>Burkholderia_pseudomallei_K96243_chromosome_1<>Burkholderia_pseudomallei_1710b_chromosome_1<>Burkholderia_383_chromosome_1<>Burkholderia_thailandensis_E264_chromosome_1<>Burkholderia_cepacia_AMMD_chromosome_1<>Burkholderia_mallei_SAVP1_chromosome_2<>Burkholderia_mallei_NCTC_10229_chromosome_2<>Burkholderia_pseudomallei_668_chromosome_1<>Burkholderia_ps…	-	1	Candidate_124_NC_008060(tandem)	P20_yes_NC_002516|3'(0)	-	-	-
Burkholderia_cenocepacia_AU_1054	|	Candidate_126_NC_008060	|	Bcen_1995		carbohydrate kinase, FGGY	*	<<<	132	|	2200307	2200613	<<<	306	|	0	>>>	Bcen_1996	uracil-xanthine permease	*	candidate	1084	2.2e-43	F	7	COD	Burkholderia_pseudomallei_1710b_chromosome_1<>Burkholderia_383_chromosome_1<>Burkholderia_thailandensis_E264_chromosome_1<>Burkholderia_cepacia_AMMD_chromosome_1<>Burkholderia_pseudomallei_668_chromosome_1<>Burkholderia_mallei_NCTC_10247_chromosome_2<>Burkholderia_vietnamiensis_G4_chromosome_1	-	0	-	P20_yes_NC_002516|3'(0),SRP_bact_NC_003047|3'(0),Cobalamin2_NC_002516|3'(0),THI_NC_002516|3'(0)	-	-	-
Burkholderia_cenocepacia_AU_1054	|	Candidate_128_NC_008060	|	Bcen_2015		Fructose-bisphosphate aldolase, class II, Calvin	*	<<<	1	|	2225912	2226021	>>>	109	|	204	<<<	Bcen_2016	Pyruvate kinase	*	candidate	1053	8.5e-42	F	12	-	Burkholderia_mallei_ATCC_23344_chromosome_1<>Burkholderia_pseudomallei_K96243_chromosome_1<>Burkholderia_pseudomallei_1710b_chromosome_1<>Burkholderia_383_chromosome_1<>Burkholderia_thailandensis_E264_chromosome_1<>Burkholderia_cepacia_AMMD_chromosome_1<>Burkholderia_mallei_SAVP1_chromosome_2<>Burkholderia_mallei_NCTC_10229_chromosome_2<>Burkholderia_pseudomallei_668_chromosome_1<>Burkholderia_ps…	-	1	Candidate_127_NC_008060(anti),Candidate_129_NC_008060(opp),Candidate_131_NC_008060(opp),Candidate_195_NC_008060(para)	P34_yes_NC_002516|3'(0),Cobalamin3_NC_002516|3'(0)	-	-	-
Burkholderia_cenocepacia_AU_1054	|	Candidate_130_NC_008060	|	Bcen_2015		Fructose-bisphosphate aldolase, class II, Calvin	*	<<<	1	|	2225912	2226148	>>>	236	|	77	<<<	Bcen_2016	Pyruvate kinase	*	candidate	1053	8.5e-42	X	12	RNA	Burkholderia_mallei_ATCC_23344_chromosome_1<>Burkholderia_pseudomallei_K96243_chromosome_1<>Burkholderia_pseudomallei_1710b_chromosome_1<>Burkholderia_383_chromosome_1<>Burkholderia_thailandensis_E264_chromosome_1<>Burkholderia_cepacia_AMMD_chromosome_1<>Burkholderia_mallei_SAVP1_chromosome_2<>Burkholderia_mallei_NCTC_10229_chromosome_2<>Burkholderia_pseudomallei_668_chromosome_1<>Burkholderia_ps…	-	1	Candidate_127_NC_008060(anti),Candidate_129_NC_008060(anti),Candidate_131_NC_008060(opp),Candidate_195_NC_008060(para)	P34_yes_NC_002516|3'(0),Cobalamin3_NC_002516|3'(0)	-	-	-
Burkholderia_cenocepacia_AU_1054	|	Candidate_133_NC_008060	|	Bcen_2056		copper resistance D	*	<<<	187	|	2272043	2272245	<<<	202	|	0	>>>	Bcen_2057	cytochrome c, class I	*	candidate	1366	4.8e-56	F	3	-	Burkholderia_383_chromosome_1<>Burkholderia_cepacia_AMMD_chromosome_1<>Burkholderia_vietnamiensis_G4_chromosome_1	-	0	-	P20_yes_NC_002516|3'(0),Cobalamin3_NC_002516|3'(0)	-	-	-
Burkholderia_cenocepacia_AU_1054	|	Candidate_134_NC_008060	|	Bcen_2061		hypothetical protein	*	<<<	1	|	2277326	2277406	>>>	80	|	245	<<<	Bcen_2062	Gamma-glutamyltransferase	*	candidate	782	1.3e-29	F	3	-	Burkholderia_383_chromosome_1<>Burkholderia_cepacia_AMMD_chromosome_1<>Burkholderia_vietnamiensis_G4_chromosome_1	-	1	Candidate_135_NC_008060(opp)	Cobalamin1_NC_002516|3'(0),P34_yes_NC_002516|3'(0)	-	-	-
Burkholderia_cenocepacia_AU_1054	|	Candidate_145_NC_008060	|	Bcen_2123		FAD linked oxidase-like	*	<<<	445	|	2348800	2348952	<<<	152	|	0	>>>	Bcen_2124	threonine dehydratase, biosynthetic	*	candidate	2068	6e-88	F	1	RNA	Burkholderia_vietnamiensis_G4_chromosome_1	-	1	Candidate_6_NC_008060(opp)	SRP_bact_NC_003047|3'(0),P26_yes_NC_002516|3'(0),P11_yes_NC_002516|3'(0),P20_yes_NC_002516|3'(0)	-	-	-
Burkholderia_cenocepacia_AU_1054	|	Candidate_155_NC_008060	|	Bcen_2205		Cyd operon protein YbgT	*	>>>	27	|	2431148	2431214	>>>	66	|	462	>>>	Bcen_2206	Beta-N-acetylhexosaminidase	*	candidate	935	9.1e-37	Z	7	RNA	Burkholderia_pseudomallei_K96243_chromosome_1<>Burkholderia_pseudomallei_1710b_chromosome_1<>Burkholderia_383_chromosome_1<>Burkholderia_thailandensis_E264_chromosome_1<>Burkholderia_cepacia_AMMD_chromosome_1<>Burkholderia_pseudomallei_1106a_chromosome_1<>Burkholderia_vietnamiensis_G4_chromosome_1	-	0	Candidate_154_NC_008060(anti)	Cobalamin2_NC_002516|3'(0),SRP_bact_NC_003047|3'(0),P20_yes_NC_002516|3'(0),P36_yes_NC_002516|3'(0)	-	-	-
Burkholderia_cenocepacia_AU_1054	|	Candidate_156_NC_008060	|	Bcen_2207		Phosphotransferase system,	*	<<<	199	|	2436353	2436451	<<<	98	|	0	>>>	Bcen_2208	transposase IS116/IS110/IS902	*	candidate	528	1.8e-18	F	10	-	Burkholderia_mallei_ATCC_23344_chromosome_1<>Burkholderia_pseudomallei_K96243_chromosome_1<>Burkholderia_pseudomallei_1710b_chromosome_1<>Acidovorax_JS42_chromosome<>Burkholderia_mallei_SAVP1_chromosome_2<>Verminephrobacter_eiseniae_EF01-2_chromosome<>Burkholderia_mallei_NCTC_10229_chromosome_2<>Burkholderia_pseudomallei_668_chromosome_1<>Burkholderia_pseudomallei_1106a_chromosome_1<>Burkholderia…	-	1	Candidate_102_NC_008060(para)	Cobalamin2_NC_002516|UD(5'(1-1)|3'(1-0)),SRP_bact_NC_002516|UD(5'(1-1)|3'(0-1))	-	-	-
Burkholderia_cenocepacia_AU_1054	|	Candidate_158_NC_008060	|	Bcen_2250		Glutamate--cysteine ligase GshA	*	<<<	152	|	2480831	2480921	<<<	90	|	0	<<<	Bcen_2251	ammonium transporter	*	candidate	976	3.1e-38	Z	3	-	Burkholderia_383_chromosome_1<>Burkholderia_cepacia_AMMD_chromosome_1<>Burkholderia_vietnamiensis_G4_chromosome_1	-	0	-	P20_yes_NC_002516|3'(0)	-	-	-
Burkholderia_cenocepacia_AU_1054	|	Candidate_159_NC_008060	|	Bcen_2252		nitrogen regulatory protein P-II	*	<<<	137	|	2482938	2483155	<<<	217	|	0	>>>	Bcen_2253	protein of unknown function DUF526	*	candidate	1421	1.7e-58	F	10	RNA	Burkholderia_mallei_ATCC_23344_chromosome_1<>Burkholderia_pseudomallei_K96243_chromosome_1<>Burkholderia_383_chromosome_1<>Burkholderia_cepacia_AMMD_chromosome_1<>Burkholderia_mallei_SAVP1_chromosome_2<>Burkholderia_mallei_NCTC_10229_chromosome_2<>Burkholderia_pseudomallei_668_chromosome_1<>Burkholderia_pseudomallei_1106a_chromosome_1<>Burkholderia_mallei_NCTC_10247_chromosome_2<>Burkholderia_vie…	-	0	-	Cobalamin3_NC_002516|UD(5'(1-0)|3'(1-1))	-	-	-
Burkholderia_cenocepacia_AU_1054	|	Candidate_160_NC_008060	|	Bcen_2254		Mg chelatase-related protein	*	>>>	118	|	2485375	2485465	>>>	90	|	124	<<<	Bcen_2255	hypothetical protein	*	candidate	490	3.2e-16	F	12	-	Burkholderia_mallei_ATCC_23344_chromosome_1<>Burkholderia_pseudomallei_K96243_chromosome_1<>Burkholderia_pseudomallei_1710b_chromosome_1<>Burkholderia_383_chromosome_1<>Burkholderia_thailandensis_E264_chromosome_1<>Burkholderia_cepacia_AMMD_chromosome_1<>Burkholderia_mallei_SAVP1_chromosome_2<>Burkholderia_mallei_NCTC_10229_chromosome_2<>Burkholderia_pseudomallei_668_chromosome_1<>Burkholderia_ps…	-	1	Candidate_230_NC_008060(para)	Cobalamin1_NC_002516|UD(5'(0-0)|3'(0-1))	-	-	-
Burkholderia_cenocepacia_AU_1054	|	Candidate_162_NC_008060	|	Bcen_2291		putative transcriptional acitvator, Baf family	*	>>>	121	|	2527598	2527669	<<<	71	|	0	>>>	Bcen_2292	hypothetical protein	*	candidate	506	6.7e-17	X	1	RNA	Burkholderia_383_chromosome_1	-	0	-	PrrF_NC_002516|3'(0),Prrf1_NC_002516|3'(0),Prrf2_NC_002516|3'(0)	-	-	-
Burkholderia_cenocepacia_AU_1054	|	Candidate_167_NC_008060	|	Bcen_2316		dienelactone hydrolase and related enzymes-like	*	>>>	134	|	2556507	2556874	>>>	367	|	-20	>>>	Bcen_2317	adenosylmethionine-8-amino-7-oxononanoate	*	candidate	842	1.1e-32	Y	3	-	Burkholderia_383_chromosome_1<>Burkholderia_cepacia_AMMD_chromosome_1<>Burkholderia_vietnamiensis_G4_chromosome_1	-	0	-	Cobalamin1_NC_002516|UD(5'(0-0)|3'(1-0)),P36_yes_NC_002516|3'(0),Cobalamin4_NC_002516|3'(0),SRP_bact_NC_003047|3'(0)	5	-	-
Burkholderia_cenocepacia_AU_1054	|	Candidate_172_NC_008060	|	Bcen_2392		Glutathione reductase	*	<<<	86	|	2636494	2636647	<<<	153	|	0	<<<	Bcen_2393	hypothetical protein	*	candidate	751	1.4e-28	Z	3	RNA	Burkholderia_383_chromosome_1<>Burkholderia_cepacia_AMMD_chromosome_1<>Burkholderia_vietnamiensis_G4_chromosome_1	-	0	-	P11_yes_NC_002516|3'(0),P20_yes_NC_002516|3'(0)	-	-	-
Burkholderia_cenocepacia_AU_1054	|	Candidate_177_NC_008060	|	Bcen_2439		Ferredoxin--NADP(+) reductase	*	>>>	13	|	2685081	2685223	>>>	142	|	259	>>>	Bcen_2440	putative signal transduction histidine kinase	*	candidate	574	2.3e-20	F	12	RNA	Burkholderia_mallei_ATCC_23344_chromosome_1<>Burkholderia_pseudomallei_K96243_chromosome_1<>Burkholderia_pseudomallei_1710b_chromosome_1<>Burkholderia_383_chromosome_1<>Burkholderia_thailandensis_E264_chromosome_1<>Burkholderia_cepacia_AMMD_chromosome_1<>Burkholderia_mallei_SAVP1_chromosome_2<>Burkholderia_mallei_NCTC_10229_chromosome_2<>Burkholderia_pseudomallei_668_chromosome_1<>Burkholderia_ps…	-	0	-	Cobalamin1_NC_002516|UD(5'(1-0)|3'(0-0)),P15_yes_NC_002516|3'(0),P20_yes_NC_002516|3'(0)	-	-	-
Burkholderia_cenocepacia_AU_1054	|	Candidate_178_NC_008060	|	Bcen_2441		two component transcriptional regulator, LuxR	*	>>>	11	|	2686972	2687074	>>>	102	|	119	>>>	Bcen_2442	amino acid permease-associated region	*	candidate	533	3.5e-18	F	2	-	Burkholderia_cepacia_AMMD_chromosome_1<>Burkholderia_vietnamiensis_G4_chromosome_1	-	1	Candidate_239_NC_008060(para)	Cobalamin2_NC_002516|3'(0)	-	-	-
Burkholderia_cenocepacia_AU_1054	|	Candidate_181_NC_008060	|	Bcen_2449		flagellar hook-basal body complex protein	*	<<<	11	|	2694128	2694248	>>>	120	|	101	>>>	Bcen_2450	flagellar M-ring protein FliF	*	candidate	537	2.1e-18	F	10	-	Burkholderia_mallei_ATCC_23344_chromosome_1<>Burkholderia_pseudomallei_K96243_chromosome_1<>Burkholderia_383_chromosome_1<>Burkholderia_cepacia_AMMD_chromosome_1<>Burkholderia_mallei_SAVP1_chromosome_2<>Burkholderia_mallei_NCTC_10229_chromosome_2<>Burkholderia_pseudomallei_668_chromosome_1<>Burkholderia_pseudomallei_1106a_chromosome_1<>Burkholderia_mallei_NCTC_10247_chromosome_2<>Burkholderia_vie…	-	0	Candidate_180_NC_008060(anti)	Cobalamin1_NC_002516|3'(0),P20_yes_NC_002516|3'(0),Cobalamin3_NC_002516|3'(0)	-	-	-
Burkholderia_cenocepacia_AU_1054	|	Candidate_182_NC_008060	|	Bcen_2457		hypothetical protein	*	>>>	1	|	2703103	2703436	>>>	333	|	127	>>>	Bcen_2458	aldehyde dehydrogenase	*	candidate	857	2.6e-33	F	1	-	Burkholderia_vietnamiensis_G4_chromosome_1	-	0	-	Cobalamin1_NC_002516|3'(0)	-	-	-
Burkholderia_cenocepacia_AU_1054	|	Candidate_185_NC_008060	|	Bcen_0254		phospho-2-dehydro-3-deoxyheptonate aldolase	*	<<<	132	|	275216	275472	<<<	256	|	9	<<<	Bcen_0255	peptidase U62, modulator of DNA gyrase	*	candidate	635	5.1e-23	Z	6	RNA	Burkholderia_pseudomallei_K96243_chromosome_1<>Burkholderia_pseudomallei_1710b_chromosome_1<>Burkholderia_383_chromosome_1<>Burkholderia_thailandensis_E264_chromosome_1<>Burkholderia_xenovorans_LB400_chromosome_1<>Burkholderia_vietnamiensis_G4_chromosome_1	-	0	Candidate_186_NC_008060(anti)	P15_yes_NC_002516|3'(0)	-	-	-E.coli_sig70_2(7.4|-163)
Burkholderia_cenocepacia_AU_1054	|	Candidate_186_NC_008060	|	Bcen_0254		phospho-2-dehydro-3-deoxyheptonate aldolase	*	<<<	18	|	275102	275248	>>>	146	|	233	<<<	Bcen_0255	peptidase U62, modulator of DNA gyrase	*	candidate	980	1.2e-38	X	4	RNA	Burkholderia_pseudomallei_K96243_chromosome_1<>Burkholderia_383_chromosome_1<>Burkholderia_thailandensis_E264_chromosome_1<>Burkholderia_vietnamiensis_G4_chromosome_1	-	2	Candidate_185_NC_008060(anti),Candidate_213_NC_008060(para),Candidate_214_NC_008060(para)	P20_yes_NC_002516|3'(0)	-	-	-
Burkholderia_cenocepacia_AU_1054	|	Candidate_196_NC_008060	|	Bcen_2619		peptidase M15B and M15C, D,D-carboxypeptidase	*	>>>	2	|	2880127	2880236	>>>	109	|	189	>>>	Bcen_2620	ImcF-related	*	candidate	1392	4.1e-57	F	3	-	Burkholderia_383_chromosome_1<>Burkholderia_cepacia_AMMD_chromosome_1<>Burkholderia_vietnamiensis_G4_chromosome_1	-	0	-	P11_yes_NC_002516|3'(0),Cobalamin2_NC_002516|3'(0)	-	-	-
Burkholderia_cenocepacia_AU_1054	|	Candidate_200_NC_008060	|	Bcen_2697		FAD dependent oxidoreductase	*	<<<	146	|	2963791	2963914	<<<	123	|	349	>>>	Bcen_2698	ABC transporter-like	*	candidate	588	9.5e-21	F	8	RNA	Burkholderia_mallei_ATCC_23344_chromosome_1<>Burkholderia_pseudomallei_K96243_chromosome_1<>Burkholderia_pseudomallei_1710b_chromosome_1<>Burkholderia_383_chromosome_1<>Burkholderia_thailandensis_E264_chromosome_1<>Burkholderia_xenovorans_LB400_chromosome_1<>Burkholderia_cepacia_AMMD_chromosome_1<>Burkholderia_vietnamiensis_G4_chromosome_1	-	0	Candidate_201_NC_008060(anti)	Cobalamin1_NC_002516|UD(5'(1-0)|3'(0-0)),P15_yes_NC_002516|3'(0)	-	-	-
Burkholderia_cenocepacia_AU_1054	|	Candidate_203_NC_008060	|	Bcen_2707		OmpW	*	>>>	1	|	2980199	2980319	>>>	120	|	56	<<<	Bcen_2708	Glycerophosphodiester phosphodiesterase	*	candidate	597	5.9e-21	Z	3	RNA	Burkholderia_383_chromosome_1<>Burkholderia_cepacia_AMMD_chromosome_1<>Burkholderia_vietnamiensis_G4_chromosome_1	-	0	Candidate_202_NC_008060(anti)	P20_yes_NC_002516|3'(0)	-	-	-
Burkholderia_cenocepacia_AU_1054	|	Candidate_219_NC_008060	|	Bcen_2830		2-nitropropane dioxygenase, NPD	*	<<<	1	|	3107370	3107547	>>>	177	|	43	>>>	Bcen_2831	Carboxymethylenebutenolidase	*	candidate	770	6.9e-29	F	3	RNA	Burkholderia_383_chromosome_1<>Burkholderia_cepacia_AMMD_chromosome_1<>Burkholderia_vietnamiensis_G4_chromosome_1	-	0	-	Cobalamin4_NC_002516|UD(5'(0-1)|3'(1-0))	5	-	-
Burkholderia_cenocepacia_AU_1054	|	Candidate_226_NC_008060	|	Bcen_2911		glycine dehydrogenase	*	>>>	1	|	3210170	3210239	>>>	69	|	83	>>>	Bcen_2912	hypothetical protein	*	candidate	482	1e-15	Z	3	RNA	Burkholderia_383_chromosome_1<>Burkholderia_cepacia_AMMD_chromosome_1<>Burkholderia_vietnamiensis_G4_chromosome_1	-	0	-	Cobalamin1_NC_002516|UD(5'(0-0)|3'(0-0)),P20_yes_NC_002516|3'(0)	-	-	-
Burkholderia_cenocepacia_AU_1054	|	Candidate_228_NC_008060	|	Bcen_2923		major facilitator superfamily MFS_1	*	<<<	11	|	3223539	3223684	<<<	145	|	7	>>>	Bcen_2924	transcriptional regulator, LysR family	*	candidate	648	3.2e-23	X	1	RNA	Burkholderia_383_chromosome_1	-	0	-	Cobalamin4_NC_002516|UD(5'(0-1)|3'(0-0)),Cobalamin1_NC_002516|3'(0),P20_yes_NC_002516|3'(0),SRP_bact_NC_003047|3'(0)	5	-	-
Burkholderia_cenocepacia_AU_1054	|	Candidate_240_NC_008060	|	Bcen_0357		hypothetical protein	*	>>>	103	|	398767	399021	>>>	254	|	258	>>>	Bcen_0358	peptidase S10, serine carboxypeptidase	*	candidate	302	4.7e-25	F	4	-	Burkholderia_pseudomallei_K96243_chromosome_1<>Burkholderia_pseudomallei_1710b_chromosome_1<>Burkholderia_383_chromosome_1<>Burkholderia_mallei_NCTC_10229_chromosome_2	-	0	-	Cobalamin1_NC_002516|3'(0)	-	-	-
Burkholderia_cenocepacia_AU_1054	|	Candidate_244_NC_008060	|	Bcen_0413		membrane protein	*	<<<	94	|	457986	458054	<<<	68	|	7	>>>	Bcen_0414	Phosphomannomutase	*	candidate	497	1.2e-16	F	2	-	Burkholderia_383_chromosome_1<>Burkholderia_vietnamiensis_G4_chromosome_1	-	0	-	P20_yes_NC_002516|3'(0)	-	-	-
Burkholderia_cenocepacia_AU_1054	|	Candidate_252_NC_008060	|	Bcen_0494		Smr protein/MutS2	*	<<<	40	|	537106	537196	<<<	90	|	4	<<<	Bcen_0495	thioredoxin reductase	*	candidate	550	9.7e-19	Z	1	RNA	Burkholderia_cepacia_AMMD_chromosome_1	-	0	-	Cobalamin1_NC_002516|3'(0)	-	-	-
Burkholderia_cenocepacia_AU_1054	|	Candidate_254_NC_008060	|	Bcen_0535		Inositol	*	<<<	1	|	576083	576160	>>>	77	|	203	<<<	Bcen_0536	Peptidase M1, alanyl aminopeptidase	*	candidate	641	3.6e-23	F	2	-	Burkholderia_383_chromosome_1<>Burkholderia_cepacia_AMMD_chromosome_1	-	0	-	Cobalamin1_NC_002516|3'(0),P11_yes_NC_002516|3'(0)	-	-	-
Burkholderia_cenocepacia_AU_1054	|	Candidate_265_NC_008060	|	Bcen_0630		Molybdenum cofactor biosynthesis protein A	*	<<<	1	|	676761	676871	>>>	110	|	19	<<<	Bcen_0631	ribonuclease, Rne/Rng family	*	candidate	551	9.1e-19	X	2	RNA	Burkholderia_383_chromosome_1<>Burkholderia_cepacia_AMMD_chromosome_1	-	3	Candidate_79_NC_008060(para),Candidate_80_NC_008060(para),Candidate_53_NC_008060(para)	rne5_NC_000913|3'(0),P20_yes_NC_002516|3'(0),P26_yes_NC_002516|3'(0),PrrF_NC_002516|3'(0),Prrf1_NC_002516|3'(0),Prrf2_NC_002516|3'(0)	-	-	-
Burkholderia_cenocepacia_AU_1054	|	Candidate_273_NC_008060	|	Bcen_0719		secretion protein HlyD	*	<<<	118	|	777876	778011	<<<	135	|	0	<<<	Bcen_0720	transcriptional regulator, IclR family	*	candidate	144	3.4e-26	F	3	-	Burkholderia_383_chromosome_1<>Burkholderia_cepacia_AMMD_chromosome_1<>Burkholderia_vietnamiensis_G4_chromosome_1	-	2	Candidate_10_NC_008060(para),Candidate_166_NC_008060(para)	ryeC_tp11_QUAD1a_NC_000913|3'(0),ryeD_tpe60_QUAD1b_NC_000913|3'(0),P18_yes_NC_002516|3'(0)	-	-	-
Burkholderia_cenocepacia_AU_1054	|	Candidate_281_NC_008060	|	Bcen_0774		major facilitator superfamily MFS_1	*	<<<	432	|	844279	844579	<<<	300	|	20	<<<	Bcen_0775	transcriptional regulator, LysR family	*	candidate	623	1.4e-22	Y	3	RNA	Burkholderia_383_chromosome_1<>Burkholderia_cepacia_AMMD_chromosome_1<>Burkholderia_vietnamiensis_G4_chromosome_1	-	1	Candidate_280_NC_008060(opp)	P20_yes_NC_002516|3'(0)	-	-	-
Burkholderia_cenocepacia_AU_1054	|	Candidate_283_NC_008060	|	Bcen_0808		major facilitator superfamily MFS_1	*	>>>	53	|	873835	873906	>>>	71	|	244	>>>	Bcen_0809	carbamoyl-phosphate synthase, small subunit	*	candidate	890	1.6e-34	F	10	RNA	Burkholderia_mallei_ATCC_23344_chromosome_1<>Burkholderia_pseudomallei_K96243_chromosome_1<>Burkholderia_pseudomallei_1710b_chromosome_1<>Burkholderia_383_chromosome_1<>Burkholderia_thailandensis_E264_chromosome_1<>Burkholderia_cepacia_AMMD_chromosome_1<>Burkholderia_mallei_SAVP1_chromosome_2<>Burkholderia_mallei_NCTC_10229_chromosome_2<>Burkholderia_mallei_NCTC_10247_chromosome_2<>Burkholderia_v…	-	0	Candidate_282_NC_008060(anti)	P32_yes_NC_002516|3'(0)	-	-	-
Burkholderia_cenocepacia_AU_1054	|	Candidate_4_NC_008061	|	Bcen_4762		protein of unknown function DUF156	*	<<<	3	|	2033664	2033727	>>>	63	|	287	>>>	Bcen_4763	sodium/calcium exchanger membrane region	*	candidate	1031	6.2e-41	R	1	RNA	Burkholderia_383_chromosome_2	-	0	-	P20_yes_NC_002516|3'(0)	-	-	-
Burkholderia_cenocepacia_AU_1054	|	Candidate_9_NC_008061	|	Bcen_3678		Amidase	*	>>>	192	|	804903	805085	<<<	182	|	1	>>>	Bcen_3679	hypothetical protein	*	candidate	591	6.7e-21	R	2	-	Burkholderia_cepacia_AMMD_chromosome_2<>Burkholderia_vietnamiensis_G4_chromosome_2	-	1	Candidate_74_NC_008061(para)	P30_yes_NC_002516|3'(0),SRP_bact_NC_003047|3'(0)	-	-	-
Burkholderia_cenocepacia_AU_1054	|	Candidate_13_NC_008061	|	Bcen_3245		GAF modulated sigma54 specific transcriptional	*	>>>	241	|	323666	323876	<<<	210	|	1	>>>	Bcen_3246	Coenzyme PQQ biosynthesis protein B	*	candidate	887	1.8e-34	R	2	-	Burkholderia_cepacia_AMMD_chromosome_3<>Burkholderia_vietnamiensis_G4_chromosome_3	-	0	-	P36_yes_NC_002516|3'(0),SRP_bact_NC_003047|3'(0),P30_yes_NC_002516|3'(0),P15_yes_NC_002516|3'(0)	-	-	-
Burkholderia_cenocepacia_AU_1054	|	Candidate_19_NC_008061	|	Bcen_3509		transcriptional regulator, LuxR family	*	>>>	18	|	620681	620752	>>>	71	|	160	>>>	Bcen_3510	type III secretion FHIPEP	*	candidate	661	6.6e-24	T	2	RNA	Burkholderia_cepacia_AMMD_chromosome_2<>Burkholderia_vietnamiensis_G4_chromosome_2	-	2	Candidate_110_NC_008061(opp),Candidate_112_NC_008061(para)	Cobalamin2_NC_002516|3'(0),P15_yes_NC_002516|3'(0),P20_yes_NC_002516|3'(0)	-	-	-
Burkholderia_cenocepacia_AU_1054	|	Candidate_25_NC_008061	|	Bcen_4604		protein of unknown function DUF521	*	<<<	76	|	1863631	1863744	<<<	113	|	16	<<<	Bcen_4605	transcriptional regulator, MarR family	*	candidate	504	8.5e-17	T	1	-	Burkholderia_383_chromosome_2	-	0	-	Cobalamin1_NC_002516|3'(0)	-	-	-
Burkholderia_cenocepacia_AU_1054	|	Candidate_27_NC_008061	|	Bcen_3851		peptidase S1 and S6, chymotrypsin/Hap	*	>>>	45	|	1009419	1009571	>>>	152	|	40	>>>	Bcen_3852	Drug resistance transporter Bcr/CflA subfamily	*	candidate	532	3.8e-18	Z	2	-	Burkholderia_383_chromosome_2<>Burkholderia_vietnamiensis_G4_chromosome_2	-	0	-	P18_yes_NC_002516|UD(5'(0-0)|3'(0-1))	5	-	-E.coli_sig70_3(8.25|-163)
Burkholderia_cenocepacia_AU_1054	|	Candidate_28_NC_008061	|	Bcen_3926		methyl-accepting chemotaxis sensory transducer	*	<<<	403	|	1090278	1090347	<<<	69	|	0	<<<	Bcen_3927	TonB-dependent receptor	*	candidate	1082	2.6e-43	F	1	-	Burkholderia_383_chromosome_2	-	0	-	P20_yes_NC_002516|3'(0)	3	-	-
Burkholderia_cenocepacia_AU_1054	|	Candidate_34_NC_008061	|	Bcen_4006		Peptidoglycan glycosyltransferase	*	<<<	81	|	1177410	1177501	<<<	91	|	22	<<<	Bcen_4007	proline racemase	*	candidate	500	1.4e-16	Y	1	-	Burkholderia_383_chromosome_2	-	0	-	P20_yes_NC_002516|3'(0),Cobalamin1_NC_002516|3'(0),P11_yes_NC_002516|3'(0),P26_yes_NC_002516|3'(0)	-	-	-
Burkholderia_cenocepacia_AU_1054	|	Candidate_38_NC_008061	|	Bcen_4041		transcriptional regulator, LysR family	*	<<<	1	|	1211403	1211601	>>>	198	|	-1	>>>	Bcen_4042	Fusaric acid resistance protein conserved	*	candidate	596	5.8e-21	F	3	-	Burkholderia_383_chromosome_2<>Burkholderia_cepacia_AMMD_chromosome_2<>Burkholderia_vietnamiensis_G4_chromosome_2	-	0	-	P20_yes_NC_002516|3'(0),Cobalamin1_NC_002516|3'(0),P34_yes_NC_002516|3'(0),SRP_bact_NC_003047|3'(0)	5	-	-
Burkholderia_cenocepacia_AU_1054	|	Candidate_39_NC_008061	|	Bcen_4071		AMP-dependent synthetase and ligase	*	<<<	1	|	1244578	1244631	>>>	53	|	113	>>>	Bcen_4072	cyclic nucleotide-binding protein	*	candidate	672	2.4e-24	F	2	-	Burkholderia_383_chromosome_2<>Burkholderia_vietnamiensis_G4_chromosome_2	-	0	-	SRP_bact_NC_002516|UD(5'(1-1)|3'(1-1))	-	-	-
Burkholderia_cenocepacia_AU_1054	|	Candidate_40_NC_008061	|	Bcen_4138		hypothetical protein	*	>>>	3	|	1319500	1319601	>>>	101	|	315	>>>	Bcen_4139	Peptidoglycan glycosyltransferase	*	candidate	1073	7.5e-43	Z	2	-	Burkholderia_383_chromosome_2<>Burkholderia_vietnamiensis_G4_chromosome_2	-	0	-	SRP_bact_NC_003047|3'(0)	-	-	-E.coli_sig70_1(7.25|-97)
Burkholderia_cenocepacia_AU_1054	|	Candidate_43_NC_008061	|	Bcen_3100		MscS Mechanosensitive ion channel	*	<<<	280	|	136648	136811	<<<	163	|	12	>>>	Bcen_3101	major facilitator superfamily MFS_1	*	candidate	589	5.2e-21	F	2	-	Burkholderia_383_chromosome_2<>Burkholderia_vietnamiensis_G4_chromosome_2	-	0	-	P20_yes_NC_002516|3'(0),Cobalamin2_NC_002516|3'(0)	-	-	-
Burkholderia_cenocepacia_AU_1054	|	Candidate_44_NC_008061	|	Bcen_4185		Gamma-glutamyltransferase	*	<<<	279	|	1383830	1383947	<<<	117	|	0	>>>	Bcen_4186	hypothetical protein	*	candidate	978	1.6e-38	X	2	-	Burkholderia_383_chromosome_2<>Burkholderia_cepacia_AMMD_chromosome_2	-	0	-	SRP_bact_NC_002516|UD(5'(1-1)|3'(0-1))	-	-	-
Burkholderia_cenocepacia_AU_1054	|	Candidate_48_NC_008061	|	Bcen_4209		porin, Gram-negative type	*	>>>	35	|	1412736	1412833	>>>	97	|	156	>>>	Bcen_4210	choline/carnitine/betaine transport	*	candidate	654	7.3e-24	X	2	-	Burkholderia_383_chromosome_2<>Burkholderia_cepacia_AMMD_chromosome_2	-	0	-	P18_yes_NC_002516|UD(5'(1-0)|3'(0-1)),Cobalamin1_NC_002516|3'(0),P20_yes_NC_002516|3'(0),Cobalamin3_NC_002516|3'(0)	-	-	-
Burkholderia_cenocepacia_AU_1054	|	Candidate_49_NC_008061	|	Bcen_4254		protein of unknown function DUF404	*	<<<	1	|	1464925	1465035	>>>	110	|	102	<<<	Bcen_4255	transglutaminase-like	*	candidate	749	6.3e-28	F	1	RNA	Burkholderia_383_chromosome_2	-	0	-	Cobalamin1_NC_002516|UD(5'(0-1)|3'(0-0)),P34_yes_NC_002516|3'(0),Cobalamin3_NC_002516|3'(0)	-	-	-
Burkholderia_cenocepacia_AU_1054	|	Candidate_57_NC_008061	|	Bcen_4412		hypothetical protein	*	<<<	74	|	1645706	1645860	<<<	154	|	582	>>>	Bcen_4413	flagellar basal body FlaE	*	candidate	771	5.2e-29	X	2	RNA	Burkholderia_cepacia_AMMD_chromosome_2<>Burkholderia_vietnamiensis_G4_chromosome_2	-	0	-	P15_yes_NC_002516|3'(0)	-	-	-
Burkholderia_cenocepacia_AU_1054	|	Candidate_59_NC_008061	|	Bcen_4424		Dimethylargininase	*	<<<	6	|	1658763	1658937	>>>	174	|	15	<<<	Bcen_4425	protein of unknown function DUF1479	*	candidate	532	3.8e-18	F	2	-	Burkholderia_383_chromosome_2<>Burkholderia_cepacia_AMMD_chromosome_2	-	0	-	P20_yes_NC_002516|3'(0)	-	-	-
Burkholderia_cenocepacia_AU_1054	|	Candidate_61_NC_008061	|	Bcen_4481		DNA primase	*	<<<	45	|	1732834	1732971	<<<	137	|	4	<<<	Bcen_4482	ribosomal protein S21	*	candidate	549	7e-19	Y	2	RNA	Burkholderia_383_chromosome_2<>Burkholderia_cepacia_AMMD_chromosome_2	-	0	-	P20_yes_NC_002516|3'(0)	-	-	-
Burkholderia_cenocepacia_AU_1054	|	Candidate_68_NC_008061	|	Bcen_4552		hypothetical protein	*	<<<	1	|	1807272	1807426	>>>	154	|	50	>>>	Bcen_4553	Endonuclease/exonuclease/phosphatase	*	candidate	678	1.1e-24	F	1	RNA	Burkholderia_383_chromosome_2	-	0	-	Cobalamin1_NC_002516|3'(0),P34_yes_NC_002516|3'(0),SRP_bact_NC_003047|3'(0)	5	-	-
Burkholderia_cenocepacia_AU_1054	|	Candidate_71_NC_008061	|	Bcen_4577		methyl-accepting chemotaxis sensory transducer	*	<<<	31	|	1835103	1835195	<<<	92	|	0	<<<	Bcen_4578	response regulator receiver sensor signal	*	candidate	542	2.5e-18	F	1	RNA	Burkholderia_383_chromosome_2	-	0	-	Cobalamin1_NC_002516|3'(0),P20_yes_NC_002516|3'(0),Cobalamin2_NC_002516|3'(0)	-	-	-
Burkholderia_cenocepacia_AU_1054	|	Candidate_72_NC_008061	|	Bcen_4579		Na+/H+ antiporter	*	<<<	159	|	1838557	1838624	<<<	67	|	2	<<<	Bcen_4580	aldehyde dehydrogenase	*	candidate	775	3.8e-29	Y	1	RNA	Burkholderia_383_chromosome_2	-	2	Candidate_8_NC_008061(para),Candidate_90_NC_008061(para)	P20_yes_NC_002516|3'(0)	3	-	-
Burkholderia_cenocepacia_AU_1054	|	Candidate_77_NC_008061	|	Bcen_4737		NAD/NADP octopine/nopaline dehydrogenase	*	<<<	59	|	2008276	2008365	<<<	89	|	0	>>>	Bcen_4738	transcriptional regulator, AraC family	*	candidate	506	8.6e-17	F	1	-	Burkholderia_cepacia_AMMD_chromosome_2	-	0	-	Cobalamin1_NC_002516|UD(5'(0-1)|3'(1-1))	-	-	-
Burkholderia_cenocepacia_AU_1054	|	Candidate_91_NC_008061	|	Bcen_5328		GCN5-related N-acetyltransferase	*	>>>	3	|	2627913	2628054	>>>	141	|	10	>>>	Bcen_5329	Thioredoxin domain	*	candidate	504	8e-17	F	1	-	Burkholderia_383_chromosome_2	-	0	-	Cobalamin2_NC_002516|3'(0),Cobalamin1_NC_002516|3'(0)	5	-	-
Burkholderia_cenocepacia_AU_1054	|	Candidate_93_NC_008061	|	Bcen_5335		histone-like nucleoid-structuring protein H-NS	*	>>>	1	|	2634955	2635025	>>>	70	|	507	>>>	Bcen_5336	GCN5-related N-acetyltransferase	*	candidate	1141	5.5e-46	Y	1	-	Burkholderia_cepacia_AMMD_chromosome_2	-	0	-	P26_yes_NC_002516|3'(0)	-	-	-
Burkholderia_cenocepacia_AU_1054	|	Candidate_94_NC_008061	|	Bcen_5369		hypothetical protein	*	<<<	61	|	2677798	2677986	<<<	188	|	0	>>>	Bcen_5370	type I phosphodiesterase/nucleotide	*	candidate	857	7.2e-33	F	3	-	Burkholderia_383_chromosome_2<>Burkholderia_cepacia_AMMD_chromosome_2<>Burkholderia_vietnamiensis_G4_chromosome_2	-	0	-	SRP_bact_NC_002516|UD(5'(0-1)|3'(1-1))	-	-	-
Burkholderia_cenocepacia_AU_1054	|	Candidate_95_NC_008061	|	Bcen_5431		TonB-dependent	*	<<<	155	|	2738179	2738250	<<<	71	|	0	<<<	Bcen_5432	hypothetical protein	*	candidate	777	3.2e-29	F	2	RNA	Burkholderia_383_chromosome_2<>Burkholderia_cepacia_AMMD_chromosome_2	-	0	-	Cobalamin2_NC_002516|3'(0),P11_yes_NC_002516|3'(0)	3	-	-
Burkholderia_cenocepacia_AU_1054	|	Candidate_99_NC_008061	|	Bcen_3259		major facilitator superfamily MFS_1	*	<<<	15	|	336124	336264	<<<	140	|	5	<<<	Bcen_3260	ABC-2 type transporter	*	candidate	648	3.1e-23	Y	1	RNA	Burkholderia_383_chromosome_2	-	0	-	P20_yes_NC_002516|3'(0)	5	-	-
Burkholderia_cenocepacia_AU_1054	|	Candidate_111_NC_008061	|	Bcen_3509		transcriptional regulator, LuxR family	*	>>>	18	|	620681	620813	>>>	132	|	99	>>>	Bcen_3510	type III secretion FHIPEP	*	candidate	661	6.6e-24	X	2	RNA	Burkholderia_cepacia_AMMD_chromosome_2<>Burkholderia_vietnamiensis_G4_chromosome_2	-	1	Candidate_110_NC_008061(anti),Candidate_112_NC_008061(para)	Cobalamin2_NC_002516|3'(0),P15_yes_NC_002516|3'(0),P20_yes_NC_002516|3'(0)	-	RS	-
Burkholderia_cenocepacia_AU_1054	|	Candidate_121_NC_008061	|	Bcen_3702		Drug resistance transporter EmrB/QacA subfamily	*	<<<	1	|	831052	831249	>>>	197	|	16	>>>	Bcen_3703	methyl-accepting chemotaxis sensory transducer	*	candidate	527	6.2e-18	X	3	-	Burkholderia_383_chromosome_2<>Burkholderia_cepacia_AMMD_chromosome_2<>Burkholderia_vietnamiensis_G4_chromosome_2	-	0	-	sokB_NC_000913|3'(0)	5	-	-
Burkholderia_cenocepacia_AU_1054	|	Candidate_122_NC_008061	|	Bcen_3062		4-hydroxyphenylpyruvate dioxygenase	*	<<<	154	|	84729	84828	<<<	99	|	3	>>>	Bcen_3063	3-dehydroquinate dehydratase, type II	*	candidate	807	1.3e-30	X	3	-	Burkholderia_383_chromosome_2<>Burkholderia_cepacia_AMMD_chromosome_2<>Burkholderia_vietnamiensis_G4_chromosome_2	-	0	-	P30_yes_NC_002516|3'(0),P20_yes_NC_002516|3'(0),Cobalamin2_NC_002516|3'(0)	-	-	-
Burkholderia_cenocepacia_AU_1054	|	Candidate_27_NC_008062	|	Bcen_5911		N-formylglutamate amidohydrolase	*	>>>	82	|	479287	479392	<<<	105	|	148	>>>	Bcen_5912	hypothetical protein	*	candidate	534	3.7e-18	X	2	RNA	Burkholderia_383_chromosome_1<>Burkholderia_cepacia_AMMD_chromosome_1	-	0	Candidate_28_NC_008062(anti)	P15_yes_NC_002516|UD(5'(1-0)|3'(1-1))	-	-	-
Burkholderia_cenocepacia_AU_1054	|	Candidate_28_NC_008062	|	Bcen_5911		N-formylglutamate amidohydrolase	*	>>>	6	|	479211	479328	>>>	117	|	212	>>>	Bcen_5912	hypothetical protein	*	candidate	534	3.7e-18	Z	2	RNA	Burkholderia_383_chromosome_1<>Burkholderia_cepacia_AMMD_chromosome_1	-	0	Candidate_27_NC_008062(anti)	yybP1ykoY_NC_002516|UD(5'(1-1)|3'(1-1))	-	-	-
Burkholderia_cenocepacia_AU_1054	|	Candidate_31_NC_008062	|	Bcen_5941		Dihydrolipoamide acetyltransferase	*	>>>	9	|	522618	522728	>>>	110	|	166	>>>	Bcen_5942	Dihydrolipoamide dehydrogenase	*	candidate	736	1.9e-27	Z	15	RNA	Burkholderia_mallei_ATCC_23344_chromosome_1<>Burkholderia_pseudomallei_K96243_chromosome_1<>Burkholderia_pseudomallei_1710b_chromosome_1<>Burkholderia_383_chromosome_1<>Burkholderia_thailandensis_E264_chromosome_1<>Burkholderia_xenovorans_LB400_chromosome_1<>Burkholderia_cepacia_AMMD_chromosome_1<>Burkholderia_cepacia_AMMD_chromosome_3<>Burkholderia_mallei_SAVP1_chromosome_2<>Burkholderia_mallei_…	-	1	Candidate_32_NC_008062(opp)	Cobalamin1_NC_002516|3'(0),RFN_NC_002516|3'(0)	-	-	-
Burkholderia_cenocepacia_AU_1054	|	Candidate_38_NC_008062	|	Bcen_6058		ribosomal protein S2	*	>>>	17	|	656098	656242	<<<	144	|	0	>>>	Bcen_6059	translation elongation factor Ts	*	candidate	756	4.1e-28	X	3	RNA	Burkholderia_383_chromosome_1<>Burkholderia_cepacia_AMMD_chromosome_1<>Burkholderia_vietnamiensis_G4_chromosome_1	-	0	-	tff_t44_ECK0167_NC_000913|3'(0)	-	-	-
Burkholderia_cenocepacia_AU_1054	|	Candidate_40_NC_008062	|	Bcen_6087		hypothetical protein	*	>>>	1	|	685003	685083	>>>	80	|	25	>>>	Bcen_6088	GMP synthase	*	candidate	499	2.5e-16	Z	1	-	Burkholderia_cepacia_AMMD_chromosome_1	-	0	-	THI_NC_002516|3'(0)	5	-	-
Burkholderia_cenocepacia_AU_1054	|	Candidate_47_NC_008062	|	Bcen_6164		D-amino-acid dehydrogenase	*	<<<	85	|	766263	766504	<<<	241	|	0	>>>	Bcen_6165	phosphoribosylformylglycinamidine synthase	*	candidate	945	5.9e-37	F	5	-	Burkholderia_mallei_ATCC_23344_chromosome_1<>Burkholderia_pseudomallei_K96243_chromosome_1<>Burkholderia_383_chromosome_1<>Burkholderia_cepacia_AMMD_chromosome_1<>Burkholderia_vietnamiensis_G4_chromosome_1	-	0	-	Cobalamin4_NC_002516|UD(5'(0-1)|3'(1-0)),P15_yes_NC_002516|UD(5'(1-1)|3'(0-0)),Cobalamin1_NC_002516|3'(0),P20_yes_NC_002516|3'(0),Cobalamin2_NC_002516|3'(0)	-	-	-
Burkholderia_cenocepacia_AU_1054	|	Candidate_54_NC_008062	|	Bcen_6231		transcriptional regulator, BadM/Rrf2 family	*	>>>	2	|	837972	838039	>>>	67	|	83	>>>	Bcen_6232	ATPase AAA-2	*	candidate	533	4.9e-18	F	1	-	Burkholderia_383_chromosome_1	-	0	-	RyfD_NC_000913|3'(0),SRP_bact_NC_003047|3'(0)	-	-	-
Burkholderia_cenocepacia_AU_1054	|	Candidate_56_NC_008062	|	Bcen_6245		4-amino-4-deoxy-L-arabinose transferase and	*	<<<	74	|	855011	855080	<<<	69	|	0	<<<	Bcen_6246	ribosomal protein L31	*	candidate	487	4.3e-16	Z	2	RNA	Burkholderia_383_chromosome_1<>Burkholderia_cepacia_AMMD_chromosome_1	-	0	-	Cobalamin1_NC_002516|3'(0),P11_yes_NC_002516|3'(0)	3	-	-
Burkholderia_cenocepacia_HI2424	|	Candidate_1_NC_008542	|	Bcen2424_0266		3-demethylubiquinone-9 3-methyltransferase	*	>>>	24	|	306680	306738	>>>	58	|	313	>>>	Bcen2424_0267	flagellar biosynthetic protein FlhB	*	candidate	476	4.1e-16	R	5	-	Burkholderia_mallei_SAVP1_chromosome_2<>Burkholderia_mallei_NCTC_10229_chromosome_2<>Burkholderia_pseudomallei_668_chromosome_1<>Burkholderia_pseudomallei_1106a_chromosome_1<>Burkholderia_mallei_NCTC_10247_chromosome_2	-	1	Candidate_92_NC_008542(para)	Cobalamin1_NC_002516|UD(5'(1-0)|3'(1-0))	-	-	-
Burkholderia_cenocepacia_HI2424	|	Candidate_3_NC_008542	|	Bcen2424_1213		protein of unknown function DUF893, YccS/YhfK	*	<<<	1	|	1338717	1338832	>>>	115	|	62	>>>	Bcen2424_1214	exodeoxyribonuclease V, gamma subunit	*	candidate	553	5.4e-19	R	3	-	Burkholderia_383_chromosome_1<>Burkholderia_cepacia_AMMD_chromosome_1<>Burkholderia_vietnamiensis_G4_chromosome_1	-	0	-	Cobalamin4_NC_002516|UD(5'(0-1)|3'(0-0)),Cobalamin1_NC_002516|3'(0),P20_yes_NC_002516|3'(0),Cobalamin2_NC_002516|3'(0),P26_yes_NC_002516|3'(0),SRP_bact_NC_003047|3'(0),P15_yes_NC_002516|3'(0),P36_yes_NC_002516|3'(0)	5	-	-
Burkholderia_cenocepacia_HI2424	|	Candidate_16_NC_008542	|	Bcen2424_2439		surface antigen (D15)	*	<<<	41	|	2714147	2714354	<<<	207	|	0	>>>	Bcen2424_2440	hypothetical protein	*	candidate	621	3.4e-22	R	1	RNA	Burkholderia_vietnamiensis_G4_chromosome_1	-	1	Candidate_11_NC_008542(para)	SRP_bact_NC_003047|3'(0)	-	RS	-
Burkholderia_cenocepacia_HI2424	|	Candidate_22_NC_008542	|	Bcen2424_0112		primosomal protein N'	*	>>>	123	|	117640	117871	>>>	231	|	71	>>>	Bcen2424_0113	delta-1-pyrroline-5-carboxylate dehydrogenase	*	candidate	932	2.2e-36	T	3	-	Burkholderia_383_chromosome_1<>Burkholderia_cepacia_AMMD_chromosome_1<>Burkholderia_vietnamiensis_G4_chromosome_1	-	0	-	Cobalamin1_NC_002516|UD(5'(0-0)|3'(0-0)),SRP_bact_NC_003047|3'(0),P15_yes_NC_002516|3'(0),Cobalamin2_NC_002516|3'(0),P20_yes_NC_002516|3'(0),P26_yes_NC_002516|3'(0)	5	-	-
Burkholderia_cenocepacia_HI2424	|	Candidate_23_NC_008542	|	Bcen2424_0325		hypothetical protein	*	<<<	18	|	371004	371114	<<<	110	|	0	<<<	Bcen2424_0326	phenylacetate-CoA oxygenase/reductase, PaaK	*	candidate	555	6.1e-19	T	3	RNA	Burkholderia_383_chromosome_1<>Burkholderia_cepacia_AMMD_chromosome_1<>Burkholderia_vietnamiensis_G4_chromosome_1	-	0	-	P15_yes_NC_002516|3'(0)	5	-	-
Burkholderia_cenocepacia_HI2424	|	Candidate_55_NC_008542	|	Bcen2424_2930		dienelactone hydrolase and related enzymes-like	*	>>>	134	|	3239747	3239897	>>>	150	|	197	>>>	Bcen2424_2931	adenosylmethionine-8-amino-7-oxononanoate	*	candidate	842	1.1e-32	T	3	-	Burkholderia_383_chromosome_1<>Burkholderia_cepacia_AMMD_chromosome_1<>Burkholderia_vietnamiensis_G4_chromosome_1	-	0	-	Cobalamin1_NC_002516|UD(5'(0-0)|3'(1-0)),P36_yes_NC_002516|3'(0),Cobalamin4_NC_002516|3'(0),SRP_bact_NC_003047|3'(0)	-	-	-
Burkholderia_cenocepacia_HI2424	|	Candidate_57_NC_008542	|	Bcen2424_3052		Endonuclease/exonuclease/phosphatase	*	>>>	69	|	3367306	3367462	>>>	156	|	54	>>>	Bcen2424_3053	Ferredoxin--NADP(+) reductase	*	candidate	662	5.5e-24	T	12	RNA	Burkholderia_mallei_ATCC_23344_chromosome_1<>Burkholderia_pseudomallei_K96243_chromosome_1<>Burkholderia_pseudomallei_1710b_chromosome_1<>Burkholderia_383_chromosome_1<>Burkholderia_thailandensis_E264_chromosome_1<>Burkholderia_cepacia_AMMD_chromosome_1<>Burkholderia_mallei_SAVP1_chromosome_2<>Burkholderia_mallei_NCTC_10229_chromosome_2<>Burkholderia_pseudomallei_668_chromosome_1<>Burkholderia_ps…	-	0	-	Cobalamin1_NC_002516|UD(5'(0-0)|3'(1-0))	5	-	-
Burkholderia_cenocepacia_HI2424	|	Candidate_58_NC_008542	|	Bcen2424_3123		sun protein	*	<<<	154	|	3439991	3440064	<<<	73	|	2	<<<	Bcen2424_3124	peptidase M48, Ste24p	*	candidate	803	2.1e-30	T	1	RNA	Burkholderia_383_chromosome_1	-	0	-	Cobalamin1_NC_002516|3'(0),SRP_bact_NC_003047|3'(0)	3	-	-
Burkholderia_cenocepacia_HI2424	|	Candidate_59_NC_008542	|	Bcen2424_0892		polysaccharide biosynthesis protein	*	<<<	94	|	1002641	1002709	<<<	68	|	7	>>>	Bcen2424_0893	Phosphomannomutase	*	candidate	497	1.2e-16	F	2	-	Burkholderia_383_chromosome_1<>Burkholderia_vietnamiensis_G4_chromosome_1	-	0	-	P20_yes_NC_002516|3'(0)	-	-	-
Burkholderia_cenocepacia_HI2424	|	Candidate_66_NC_008542	|	Bcen2424_0973		Smr protein/MutS2	*	<<<	40	|	1081750	1081840	<<<	90	|	4	<<<	Bcen2424_0974	thioredoxin reductase	*	candidate	550	9.7e-19	Z	1	RNA	Burkholderia_cepacia_AMMD_chromosome_1	-	1	Candidate_148_NC_008542(para)	Cobalamin1_NC_002516|3'(0)	-	RS	-
Burkholderia_cenocepacia_HI2424	|	Candidate_69_NC_008542	|	Bcen2424_0108		AMP-dependent synthetase and ligase	*	>>>	14	|	112072	112342	<<<	270	|	0	<<<	Bcen2424_0109	hypothetical protein	*	candidate	878	3.6e-34	F	7	-	Burkholderia_mallei_ATCC_23344_chromosome_1<>Burkholderia_pseudomallei_K96243_chromosome_1<>Burkholderia_383_chromosome_1<>Burkholderia_thailandensis_E264_chromosome_1<>Burkholderia_xenovorans_LB400_chromosome_1<>Burkholderia_cepacia_AMMD_chromosome_1<>Burkholderia_pseudomallei_668_chromosome_1	-	0	-	SRP_bact_NC_003047|3'(0)	-	-	-
Burkholderia_cenocepacia_HI2424	|	Candidate_70_NC_008542	|	Bcen2424_1014		Inositol	*	<<<	1	|	1120726	1120803	>>>	77	|	203	<<<	Bcen2424_1015	aminopeptidase N	*	candidate	641	3.6e-23	F	2	-	Burkholderia_383_chromosome_1<>Burkholderia_cepacia_AMMD_chromosome_1	-	0	-	Cobalamin1_NC_002516|3'(0),P11_yes_NC_002516|3'(0)	-	-	-
Burkholderia_cenocepacia_HI2424	|	Candidate_71_NC_008542	|	Bcen2424_0108		AMP-dependent synthetase and ligase	*	>>>	59	|	112117	112342	<<<	225	|	0	<<<	Bcen2424_0109	hypothetical protein	*	candidate	878	3.6e-34	Z	7	-	Burkholderia_mallei_ATCC_23344_chromosome_1<>Burkholderia_pseudomallei_K96243_chromosome_1<>Burkholderia_383_chromosome_1<>Burkholderia_thailandensis_E264_chromosome_1<>Burkholderia_xenovorans_LB400_chromosome_1<>Burkholderia_cepacia_AMMD_chromosome_1<>Burkholderia_pseudomallei_668_chromosome_1	-	0	-	SRP_bact_NC_003047|3'(0)	-	-	-
Burkholderia_cenocepacia_HI2424	|	Candidate_72_NC_008542	|	Bcen2424_0108		AMP-dependent synthetase and ligase	*	>>>	83	|	112141	112342	<<<	201	|	0	<<<	Bcen2424_0109	hypothetical protein	*	candidate	878	3.6e-34	F	7	-	Burkholderia_mallei_ATCC_23344_chromosome_1<>Burkholderia_pseudomallei_K96243_chromosome_1<>Burkholderia_383_chromosome_1<>Burkholderia_thailandensis_E264_chromosome_1<>Burkholderia_xenovorans_LB400_chromosome_1<>Burkholderia_cepacia_AMMD_chromosome_1<>Burkholderia_pseudomallei_668_chromosome_1	-	0	-	SRP_bact_NC_003047|3'(0)	-	-	-
Burkholderia_cenocepacia_HI2424	|	Candidate_84_NC_008542	|	Bcen2424_1109		molybdenum cofactor biosynthesis protein A	*	<<<	1	|	1221397	1221507	>>>	110	|	19	<<<	Bcen2424_1110	ribonuclease, Rne/Rng family	*	candidate	551	9.1e-19	X	2	RNA	Burkholderia_383_chromosome_1<>Burkholderia_cepacia_AMMD_chromosome_1	-	5	Candidate_5_NC_008542(para),Candidate_167_NC_008542(para),Candidate_325_NC_008542(para),Candidate_326_NC_008542(para),Candidate_119_NC_008542(para)	rne5_NC_000913|3'(0),P20_yes_NC_002516|3'(0),P26_yes_NC_002516|3'(0),PrrF_NC_002516|3'(0),Prrf1_NC_002516|3'(0),Prrf2_NC_002516|3'(0)	-	-	-
Burkholderia_cenocepacia_HI2424	|	Candidate_92_NC_008542	|	Bcen2424_1198		efflux transporter, RND family, MFP subunit	*	<<<	118	|	1322511	1322646	<<<	135	|	0	<<<	Bcen2424_1199	transcriptional regulator, IclR family	*	candidate	144	3.4e-26	F	3	-	Burkholderia_383_chromosome_1<>Burkholderia_cepacia_AMMD_chromosome_1<>Burkholderia_vietnamiensis_G4_chromosome_1	-	4	Candidate_1_NC_008542(para),Candidate_153_NC_008542(para),Candidate_264_NC_008542(para),Candidate_202_NC_008542(para)	ryeC_tp11_QUAD1a_NC_000913|3'(0),ryeD_tpe60_QUAD1b_NC_000913|3'(0),P18_yes_NC_002516|3'(0)	-	-	-
Burkholderia_cenocepacia_HI2424	|	Candidate_99_NC_008542	|	Bcen2424_1255		major facilitator superfamily MFS_1	*	<<<	432	|	1388914	1389214	<<<	300	|	20	<<<	Bcen2424_1256	transcriptional regulator, LysR family	*	candidate	623	1.4e-22	Y	3	RNA	Burkholderia_383_chromosome_1<>Burkholderia_cepacia_AMMD_chromosome_1<>Burkholderia_vietnamiensis_G4_chromosome_1	-	1	Candidate_98_NC_008542(opp)	P20_yes_NC_002516|3'(0)	-	-	-
Burkholderia_cenocepacia_HI2424	|	Candidate_101_NC_008542	|	Bcen2424_1289		major facilitator superfamily MFS_1	*	>>>	41	|	1418459	1418542	>>>	83	|	244	>>>	Bcen2424_1290	carbamoyl-phosphate synthase, small subunit	*	candidate	895	9.3e-35	F	10	RNA	Burkholderia_mallei_ATCC_23344_chromosome_1<>Burkholderia_pseudomallei_K96243_chromosome_1<>Burkholderia_pseudomallei_1710b_chromosome_1<>Burkholderia_383_chromosome_1<>Burkholderia_thailandensis_E264_chromosome_1<>Burkholderia_cepacia_AMMD_chromosome_1<>Burkholderia_mallei_SAVP1_chromosome_2<>Burkholderia_mallei_NCTC_10229_chromosome_2<>Burkholderia_mallei_NCTC_10247_chromosome_2<>Burkholderia_v…	-	0	Candidate_100_NC_008542(anti)	P32_yes_NC_002516|3'(0)	-	-	-
Burkholderia_cenocepacia_HI2424	|	Candidate_106_NC_008542	|	Bcen2424_0131		transcriptional regulator, LysR family	*	<<<	9	|	143336	143480	>>>	144	|	10	>>>	Bcen2424_0132	major facilitator superfamily MFS_1	*	candidate	648	3.2e-23	X	1	RNA	Burkholderia_383_chromosome_1	-	0	-	Cobalamin4_NC_002516|UD(5'(0-1)|3'(0-0)),Cobalamin1_NC_002516|3'(0),P20_yes_NC_002516|3'(0),SRP_bact_NC_003047|3'(0)	5	-	-
Burkholderia_cenocepacia_HI2424	|	Candidate_111_NC_008542	|	Bcen2424_0143		hypothetical protein	*	<<<	84	|	156773	156842	<<<	69	|	0	<<<	Bcen2424_0144	glycine dehydrogenase	*	candidate	482	1e-15	Z	3	RNA	Burkholderia_383_chromosome_1<>Burkholderia_cepacia_AMMD_chromosome_1<>Burkholderia_vietnamiensis_G4_chromosome_1	-	0	-	P20_yes_NC_002516|3'(0),Cobalamin1_NC_002516|3'(0)	3	-	-
Burkholderia_cenocepacia_HI2424	|	Candidate_112_NC_008542	|	Bcen2424_1444		major facilitator superfamily MFS_1	*	<<<	1	|	1598124	1598358	>>>	234	|	169	>>>	Bcen2424_1445	methyl-accepting chemotaxis sensory transducer	*	candidate	1142	6e-46	X	3	RNA	Burkholderia_383_chromosome_1<>Burkholderia_cepacia_AMMD_chromosome_1<>Burkholderia_vietnamiensis_G4_chromosome_1	-	0	-	sokB_NC_000913|3'(0),Cobalamin1_NC_002516|3'(0)	-	-	-
Burkholderia_cenocepacia_HI2424	|	Candidate_124_NC_008542	|	Bcen2424_1507		GTP-binding protein TypA	*	>>>	24	|	1665442	1665734	<<<	292	|	0	>>>	Bcen2424_1508	2-oxoglutarate dehydrogenase, E1 subunit	*	candidate	1345	5.2e-55	X	3	RNA	Burkholderia_383_chromosome_1<>Burkholderia_cepacia_AMMD_chromosome_1<>Burkholderia_vietnamiensis_G4_chromosome_1	-	0	-	P30_yes_NC_002516|3'(0)	-	-	-
Burkholderia_cenocepacia_HI2424	|	Candidate_125_NC_008542	|	Bcen2424_1507		GTP-binding protein TypA	*	>>>	118	|	1665536	1665734	<<<	198	|	0	>>>	Bcen2424_1508	2-oxoglutarate dehydrogenase, E1 subunit	*	candidate	1345	5.2e-55	F	13	-	Burkholderia_mallei_ATCC_23344_chromosome_1<>Burkholderia_pseudomallei_K96243_chromosome_1<>Burkholderia_pseudomallei_1710b_chromosome_1<>Burkholderia_383_chromosome_1<>Burkholderia_thailandensis_E264_chromosome_1<>Burkholderia_xenovorans_LB400_chromosome_1<>Burkholderia_cepacia_AMMD_chromosome_1<>Burkholderia_mallei_SAVP1_chromosome_2<>Burkholderia_mallei_NCTC_10229_chromosome_2<>Burkholderia_ps…	-	0	-	P30_yes_NC_002516|3'(0)	-	-	-
Burkholderia_cenocepacia_HI2424	|	Candidate_126_NC_008542	|	Bcen2424_1544		ROK family protein	*	<<<	254	|	1709069	1709257	<<<	188	|	4	<<<	trRNA	trRNA	*	candidate	247	5.5e-24	Z	2	RNA	Burkholderia_383_chromosome_1<>Burkholderia_cepacia_AMMD_chromosome_1	-	5	Candidate_5_NC_008542(para),Candidate_167_NC_008542(para),Candidate_4_NC_008542(para),Candidate_155_NC_008542(para),Candidate_156_NC_008542(para)	P15_yes_NC_002516|3'(0)	-	-	-E.coli_sig70_1(10.5|-311)
Burkholderia_cenocepacia_HI2424	|	Candidate_127_NC_008542	|	trRNA		trRNA	*	<<<	1	|	1711074	1711202	>>>	128	|	119	>>>	Bcen2424_1546	ribonuclease R	*	candidate	1031	1e-40	F	3	-	Burkholderia_383_chromosome_1<>Burkholderia_cepacia_AMMD_chromosome_1<>Burkholderia_vietnamiensis_G4_chromosome_1	-	0	-	P20_yes_NC_002516|3'(0),Cobalamin2_NC_002516|3'(0)	-	-	-
Burkholderia_cenocepacia_HI2424	|	Candidate_137_NC_008542	|	Bcen2424_1639		cyclic peptide transporter	*	<<<	57	|	1808108	1808202	<<<	94	|	0	>>>	Bcen2424_1640	amino acid adenylation domain	*	candidate	575	3.6e-20	F	2	RNA	Burkholderia_383_chromosome_1<>Burkholderia_cepacia_AMMD_chromosome_1	-	0	-	Cobalamin3_NC_002516|UD(5'(0-0)|3'(0-1)),P15_yes_NC_002516|UD(5'(0-0)|3'(0-1)),P30_yes_NC_002516|UD(5'(1-1)|3'(0-0)),P20_yes_NC_002516|3'(0)	-	-	-
Burkholderia_cenocepacia_HI2424	|	Candidate_145_NC_008542	|	Bcen2424_1833		ribosomal protein L31	*	>>>	1	|	2036625	2036695	>>>	70	|	72	>>>	Bcen2424_1834	4-amino-4-deoxy-L-arabinose transferase and	*	candidate	487	4.3e-16	Z	2	RNA	Burkholderia_383_chromosome_1<>Burkholderia_cepacia_AMMD_chromosome_1	-	0	-	Cobalamin1_NC_002516|3'(0),P11_yes_NC_002516|3'(0)	5	-	-
Burkholderia_cenocepacia_HI2424	|	Candidate_147_NC_008542	|	Bcen2424_1847		ATPase AAA-2 domain protein	*	<<<	83	|	2053665	2053734	<<<	69	|	0	<<<	Bcen2424_1848	transcriptional regulator, BadM/Rrf2 family	*	candidate	533	4.9e-18	F	1	-	Burkholderia_383_chromosome_1	-	0	-	RyfD_NC_000913|3'(0),SRP_bact_NC_003047|3'(0)	3	-	-
Burkholderia_cenocepacia_HI2424	|	Candidate_148_NC_008542	|	Bcen2424_1864		alkyl hydroperoxide reductase/ Thiol specific	*	>>>	87	|	2070230	2070292	>>>	62	|	182	>>>	Bcen2424_1865	PhoH family protein	*	candidate	495	5.4e-24	Y	13	RNA	Burkholderia_mallei_ATCC_23344_chromosome_1<>Burkholderia_pseudomallei_K96243_chromosome_1<>Burkholderia_pseudomallei_1710b_chromosome_1<>Burkholderia_383_chromosome_1<>Burkholderia_thailandensis_E264_chromosome_1<>Burkholderia_xenovorans_LB400_chromosome_1<>Burkholderia_cepacia_AMMD_chromosome_1<>Burkholderia_mallei_SAVP1_chromosome_2<>Burkholderia_mallei_NCTC_10229_chromosome_2<>Burkholderia_ps…	-	1	Candidate_66_NC_008542(para)	P34_yes_NC_002516|3'(0)	-	-	-
Burkholderia_cenocepacia_HI2424	|	Candidate_154_NC_008542	|	Bcen2424_1914		phosphoribosylformylglycinamidine synthase	*	<<<	1	|	2125200	2125440	>>>	240	|	85	>>>	Bcen2424_1915	D-amino-acid dehydrogenase	*	candidate	945	5.9e-37	F	5	-	Burkholderia_mallei_ATCC_23344_chromosome_1<>Burkholderia_pseudomallei_K96243_chromosome_1<>Burkholderia_383_chromosome_1<>Burkholderia_cepacia_AMMD_chromosome_1<>Burkholderia_vietnamiensis_G4_chromosome_1	-	2	Candidate_109_NC_008542(para),Candidate_271_NC_008542(para)	P15_yes_NC_002516|UD(5'(1-0)|3'(0-0)),Cobalamin4_NC_002516|UD(5'(0-1)|3'(1-0)),RFN_NC_002516|UD(5'(0-0)|3'(1-1)),Cobalamin1_NC_002516|3'(0),P20_yes_NC_002516|3'(0),Cobalamin2_NC_002516|3'(0),P34_yes_NC_002516|3'(0)	-	-	-
Burkholderia_cenocepacia_HI2424	|	Candidate_162_NC_008542	|	Bcen2424_1989		GMP synthase, large subunit	*	<<<	25	|	2206620	2206701	<<<	81	|	0	<<<	Bcen2424_1990	hypothetical protein	*	candidate	499	2.5e-16	Z	1	-	Burkholderia_cepacia_AMMD_chromosome_1	-	0	-	THI_NC_002516|3'(0)	5	-	-
Burkholderia_cenocepacia_HI2424	|	Candidate_171_NC_008542	|	Bcen2424_2135		dihydrolipoamide dehydrogenase	*	<<<	166	|	2368976	2369088	<<<	112	|	7	<<<	Bcen2424_2136	pyruvate dehydrogenase complex dihydrolipoamide	*	candidate	736	1.9e-27	X	15	RNA	Burkholderia_mallei_ATCC_23344_chromosome_1<>Burkholderia_pseudomallei_K96243_chromosome_1<>Burkholderia_pseudomallei_1710b_chromosome_1<>Burkholderia_383_chromosome_1<>Burkholderia_thailandensis_E264_chromosome_1<>Burkholderia_xenovorans_LB400_chromosome_1<>Burkholderia_cepacia_AMMD_chromosome_1<>Burkholderia_cepacia_AMMD_chromosome_3<>Burkholderia_mallei_SAVP1_chromosome_2<>Burkholderia_mallei_…	-	3	Candidate_170_NC_008542(opp),Candidate_89_NC_008542(para),Candidate_90_NC_008542(para)	Cobalamin1_NC_002516|3'(0),RFN_NC_002516|3'(0)	-	-	-
Burkholderia_cenocepacia_HI2424	|	Candidate_174_NC_008542	|	Bcen2424_2165		hypothetical protein	*	<<<	150	|	2412314	2412417	>>>	103	|	82	<<<	Bcen2424_2166	N-formylglutamate amidohydrolase	*	candidate	534	3.7e-18	X	2	RNA	Burkholderia_383_chromosome_1<>Burkholderia_cepacia_AMMD_chromosome_1	-	0	Candidate_173_NC_008542(anti)	P15_yes_NC_002516|UD(5'(1-0)|3'(1-1))	-	-	-
Burkholderia_cenocepacia_HI2424	|	Candidate_185_NC_008542	|	Bcen2424_2265		acetolactate synthase, large subunit,	*	<<<	175	|	2521676	2521768	<<<	92	|	87	>>>	Bcen2424_2266	RNA polymerase, sigma-24 subunit, ECF subfamily	*	candidate	860	3.3e-33	F	10	RNA	Burkholderia_pseudomallei_K96243_chromosome_1<>Burkholderia_pseudomallei_1710b_chromosome_1<>Burkholderia_383_chromosome_1<>Burkholderia_thailandensis_E264_chromosome_1<>Burkholderia_xenovorans_LB400_chromosome_1<>Burkholderia_cepacia_AMMD_chromosome_1<>Burkholderia_mallei_SAVP1_chromosome_2<>Burkholderia_mallei_NCTC_10229_chromosome_2<>Burkholderia_mallei_NCTC_10247_chromosome_2<>Burkholderia_vi…	-	0	-	T1box11_NC_000964|3'(0)	-	-	-
Burkholderia_cenocepacia_HI2424	|	Candidate_187_NC_008542	|	Bcen2424_2285		osmosensitive K+ channel signal transduction	*	<<<	62	|	2541370	2541455	<<<	85	|	5	<<<	Bcen2424_2286	potassium-transporting ATPase, C subunit	*	candidate	513	4.3e-17	X	1	RNA	Burkholderia_cepacia_AMMD_chromosome_1	-	0	-	P30_yes_NC_002516|UD(5'(1-1)|3'(0-0)),P20_yes_NC_002516|3'(0),Cobalamin2_NC_002516|3'(0),Cobalamin1_NC_002516|3'(0),SRP_bact_NC_003047|3'(0)	-	-	-
Burkholderia_cenocepacia_HI2424	|	Candidate_207_NC_008542	|	trRNA		trRNA	*	>>>	34	|	2749854	2749906	>>>	52	|	264	<<<	Bcen2424_2478	transcriptional regulator, LysR family	*	candidate	724	5.6e-27	Y	2	-	Burkholderia_383_chromosome_1<>Burkholderia_cepacia_AMMD_chromosome_1	-	2	Candidate_321_NC_008542(para),Candidate_243_NC_008542(para)	Cobalamin1_NC_002516|3'(0)	-	-	-
Burkholderia_cenocepacia_HI2424	|	Candidate_208_NC_008542	|	trRNA		trRNA	*	>>>	34	|	2749854	2750035	>>>	181	|	135	<<<	Bcen2424_2478	transcriptional regulator, LysR family	*	candidate	724	5.6e-27	F	2	COD	Burkholderia_383_chromosome_1<>Burkholderia_cepacia_AMMD_chromosome_1	-	2	Candidate_321_NC_008542(para),Candidate_243_NC_008542(para)	Cobalamin1_NC_002516|3'(0)	-	-	-
Burkholderia_cenocepacia_HI2424	|	Candidate_214_NC_008542	|	Bcen2424_2503		ribosomal protein L33	*	>>>	7	|	2771830	2771887	>>>	57	|	111	>>>	Bcen2424_2504	L-aspartate oxidase	*	candidate	590	1.2e-20	Z	1	RNA	Burkholderia_vietnamiensis_G4_chromosome_1	-	0	Candidate_213_NC_008542(anti)	P30_yes_NC_002516|3'(0)	-	-	-
Burkholderia_cenocepacia_HI2424	|	Candidate_215_NC_008542	|	Bcen2424_2520		cold-shock DNA-binding domain protein	*	>>>	1	|	2792897	2792989	>>>	92	|	87	<<<	Bcen2424_2521	multicopper oxidase, type 3	*	candidate	509	5.3e-17	Y	3	RNA	Burkholderia_383_chromosome_1<>Burkholderia_cepacia_AMMD_chromosome_1<>Burkholderia_vietnamiensis_G4_chromosome_1	-	0	Candidate_49_NC_008542(anti)	P20_yes_NC_002516|3'(0)	-	-	-
Burkholderia_cenocepacia_HI2424	|	Candidate_216_NC_008542	|	Bcen2424_2521		multicopper oxidase, type 3	*	<<<	76	|	2794761	2795189	<<<	428	|	72	>>>	Bcen2424_2522	hypothetical protein	*	candidate	1036	2.2e-41	X	3	RNA	Burkholderia_383_chromosome_1<>Burkholderia_cepacia_AMMD_chromosome_1<>Burkholderia_vietnamiensis_G4_chromosome_1	-	1	Candidate_165_NC_008542(para)	P20_yes_NC_002516|3'(0),SRP_bact_NC_003047|3'(0)	-	RS	-
Burkholderia_cenocepacia_HI2424	|	Candidate_221_NC_008542	|	Bcen2424_2550		integral membrane protein MviN	*	<<<	48	|	2827464	2827573	<<<	109	|	147	>>>	Bcen2424_2551	ribosomal protein S20	*	candidate	298	1.8e-29	F	7	-	Burkholderia_mallei_ATCC_23344_chromosome_1<>Burkholderia_pseudomallei_K96243_chromosome_1<>Burkholderia_383_chromosome_1<>Burkholderia_thailandensis_E264_chromosome_1<>Burkholderia_cepacia_AMMD_chromosome_1<>Burkholderia_mallei_SAVP1_chromosome_2<>Burkholderia_vietnamiensis_G4_chromosome_1	-	1	Candidate_222_NC_008542(tandem)	P20_yes_NC_002516|3'(0)	-	-	-
Burkholderia_cenocepacia_HI2424	|	Candidate_222_NC_008542	|	Bcen2424_2550		integral membrane protein MviN	*	<<<	242	|	2827658	2827720	<<<	62	|	0	>>>	Bcen2424_2551	ribosomal protein S20	*	candidate	1156	1.9e-46	F	12	-	Burkholderia_mallei_ATCC_23344_chromosome_1<>Burkholderia_pseudomallei_K96243_chromosome_1<>Burkholderia_pseudomallei_1710b_chromosome_1<>Burkholderia_383_chromosome_1<>Burkholderia_thailandensis_E264_chromosome_1<>Burkholderia_cepacia_AMMD_chromosome_1<>Burkholderia_mallei_SAVP1_chromosome_2<>Burkholderia_mallei_NCTC_10229_chromosome_2<>Burkholderia_pseudomallei_668_chromosome_1<>Burkholderia_ps…	-	1	Candidate_221_NC_008542(tandem)	P20_yes_NC_002516|3'(0)	-	-	-
Burkholderia_cenocepacia_HI2424	|	Candidate_226_NC_008542	|	Bcen2424_2626		fructose-bisphosphate aldolase, class II, Calvin	*	<<<	1	|	2910259	2910368	>>>	109	|	204	<<<	Bcen2424_2627	Pyruvate kinase	*	candidate	1044	2.2e-41	F	12	-	Burkholderia_mallei_ATCC_23344_chromosome_1<>Burkholderia_pseudomallei_K96243_chromosome_1<>Burkholderia_pseudomallei_1710b_chromosome_1<>Burkholderia_383_chromosome_1<>Burkholderia_thailandensis_E264_chromosome_1<>Burkholderia_cepacia_AMMD_chromosome_1<>Burkholderia_mallei_SAVP1_chromosome_2<>Burkholderia_mallei_NCTC_10229_chromosome_2<>Burkholderia_pseudomallei_668_chromosome_1<>Burkholderia_ps…	-	1	Candidate_225_NC_008542(anti),Candidate_227_NC_008542(opp),Candidate_229_NC_008542(opp),Candidate_310_NC_008542(para)	P34_yes_NC_002516|3'(0),Cobalamin3_NC_002516|3'(0)	-	-	-
Burkholderia_cenocepacia_HI2424	|	Candidate_228_NC_008542	|	Bcen2424_2626		fructose-bisphosphate aldolase, class II, Calvin	*	<<<	1	|	2910259	2910495	>>>	236	|	77	<<<	Bcen2424_2627	Pyruvate kinase	*	candidate	1044	2.2e-41	X	12	RNA	Burkholderia_mallei_ATCC_23344_chromosome_1<>Burkholderia_pseudomallei_K96243_chromosome_1<>Burkholderia_pseudomallei_1710b_chromosome_1<>Burkholderia_383_chromosome_1<>Burkholderia_thailandensis_E264_chromosome_1<>Burkholderia_cepacia_AMMD_chromosome_1<>Burkholderia_mallei_SAVP1_chromosome_2<>Burkholderia_mallei_NCTC_10229_chromosome_2<>Burkholderia_pseudomallei_668_chromosome_1<>Burkholderia_ps…	-	1	Candidate_225_NC_008542(anti),Candidate_227_NC_008542(anti),Candidate_229_NC_008542(opp),Candidate_310_NC_008542(para)	P34_yes_NC_002516|3'(0),Cobalamin3_NC_002516|3'(0)	-	-	-
Burkholderia_cenocepacia_HI2424	|	Candidate_232_NC_008542	|	Bcen2424_2667		copper resistance D domain protein	*	<<<	187	|	2956390	2956592	<<<	202	|	0	>>>	Bcen2424_2668	cytochrome c, class I	*	candidate	1366	4.8e-56	F	3	-	Burkholderia_383_chromosome_1<>Burkholderia_cepacia_AMMD_chromosome_1<>Burkholderia_vietnamiensis_G4_chromosome_1	-	0	-	P20_yes_NC_002516|3'(0),Cobalamin3_NC_002516|3'(0)	-	-	-
Burkholderia_cenocepacia_HI2424	|	Candidate_233_NC_008542	|	Bcen2424_2672		hypothetical protein	*	<<<	1	|	2961673	2961753	>>>	80	|	245	<<<	Bcen2424_2673	Gamma-glutamyltransferase	*	candidate	782	1.3e-29	F	3	-	Burkholderia_383_chromosome_1<>Burkholderia_cepacia_AMMD_chromosome_1<>Burkholderia_vietnamiensis_G4_chromosome_1	-	1	Candidate_234_NC_008542(opp)	Cobalamin1_NC_002516|3'(0),P34_yes_NC_002516|3'(0)	-	-	-
Burkholderia_cenocepacia_HI2424	|	Candidate_244_NC_008542	|	Bcen2424_2735		FAD linked oxidase domain protein	*	<<<	445	|	3033147	3033299	<<<	152	|	0	>>>	Bcen2424_2736	threonine dehydratase, biosynthetic	*	candidate	2068	6e-88	F	1	RNA	Burkholderia_vietnamiensis_G4_chromosome_1	-	1	Candidate_9_NC_008542(opp)	SRP_bact_NC_003047|3'(0),P11_yes_NC_002516|3'(0),P26_yes_NC_002516|3'(0),P20_yes_NC_002516|3'(0)	-	-	-
Burkholderia_cenocepacia_HI2424	|	Candidate_252_NC_008542	|	Bcen2424_2819		cyd operon protein YbgT	*	>>>	27	|	3115506	3115572	>>>	66	|	462	>>>	Bcen2424_2820	Beta-N-acetylhexosaminidase	*	candidate	935	9.1e-37	Z	7	RNA	Burkholderia_pseudomallei_K96243_chromosome_1<>Burkholderia_pseudomallei_1710b_chromosome_1<>Burkholderia_383_chromosome_1<>Burkholderia_thailandensis_E264_chromosome_1<>Burkholderia_cepacia_AMMD_chromosome_1<>Burkholderia_pseudomallei_1106a_chromosome_1<>Burkholderia_vietnamiensis_G4_chromosome_1	-	0	Candidate_251_NC_008542(anti)	Cobalamin2_NC_002516|3'(0),SRP_bact_NC_003047|3'(0),P20_yes_NC_002516|3'(0),P36_yes_NC_002516|3'(0)	-	-	-
Burkholderia_cenocepacia_HI2424	|	Candidate_255_NC_008542	|	Bcen2424_2864		glutamate--cysteine ligase	*	<<<	152	|	3164005	3164095	<<<	90	|	0	<<<	Bcen2424_2865	ammonium transporter	*	candidate	976	3.1e-38	Z	3	-	Burkholderia_383_chromosome_1<>Burkholderia_cepacia_AMMD_chromosome_1<>Burkholderia_vietnamiensis_G4_chromosome_1	-	0	-	P20_yes_NC_002516|3'(0)	-	-	-
Burkholderia_cenocepacia_HI2424	|	Candidate_256_NC_008542	|	Bcen2424_2866		nitrogen regulatory protein P-II	*	<<<	65	|	3166112	3166329	<<<	217	|	0	>>>	Bcen2424_2867	protein of unknown function DUF526	*	candidate	1131	2.1e-45	F	10	RNA	Burkholderia_mallei_ATCC_23344_chromosome_1<>Burkholderia_pseudomallei_K96243_chromosome_1<>Burkholderia_383_chromosome_1<>Burkholderia_cepacia_AMMD_chromosome_1<>Burkholderia_mallei_SAVP1_chromosome_2<>Burkholderia_mallei_NCTC_10229_chromosome_2<>Burkholderia_pseudomallei_668_chromosome_1<>Burkholderia_pseudomallei_1106a_chromosome_1<>Burkholderia_mallei_NCTC_10247_chromosome_2<>Burkholderia_vie…	-	0	-	Cobalamin3_NC_002516|UD(5'(1-0)|3'(1-1))	-	-	-
Burkholderia_cenocepacia_HI2424	|	Candidate_257_NC_008542	|	Bcen2424_2868		Mg chelatase, subunit ChlI	*	>>>	118	|	3168549	3168639	>>>	90	|	124	<<<	Bcen2424_2869	hypothetical protein	*	candidate	490	3.2e-16	F	12	-	Burkholderia_mallei_ATCC_23344_chromosome_1<>Burkholderia_pseudomallei_K96243_chromosome_1<>Burkholderia_pseudomallei_1710b_chromosome_1<>Burkholderia_383_chromosome_1<>Burkholderia_thailandensis_E264_chromosome_1<>Burkholderia_cepacia_AMMD_chromosome_1<>Burkholderia_mallei_SAVP1_chromosome_2<>Burkholderia_mallei_NCTC_10229_chromosome_2<>Burkholderia_pseudomallei_668_chromosome_1<>Burkholderia_ps…	-	1	Candidate_76_NC_008542(para)	Cobalamin1_NC_002516|UD(5'(0-0)|3'(0-1))	-	-	-
Burkholderia_cenocepacia_HI2424	|	Candidate_258_NC_008542	|	Bcen2424_0276		Carboxymethylenebutenolidase	*	<<<	43	|	319097	319275	<<<	178	|	0	>>>	Bcen2424_0277	2-nitropropane dioxygenase, NPD	*	candidate	770	6.9e-29	F	3	RNA	Burkholderia_383_chromosome_1<>Burkholderia_cepacia_AMMD_chromosome_1<>Burkholderia_vietnamiensis_G4_chromosome_1	-	0	-	P15_yes_NC_002516|UD(5'(0-0)|3'(1-1)),Cobalamin4_NC_002516|UD(5'(0-1)|3'(1-0))	-	-	-
Burkholderia_cenocepacia_HI2424	|	Candidate_261_NC_008542	|	Bcen2424_2905		putative transcriptional acitvator, Baf family	*	>>>	121	|	3210838	3210909	<<<	71	|	0	>>>	Bcen2424_2906	hypothetical protein	*	candidate	506	6.7e-17	X	1	RNA	Burkholderia_383_chromosome_1	-	0	-	PrrF_NC_002516|3'(0),Prrf1_NC_002516|3'(0),Prrf2_NC_002516|3'(0)	-	-	-
Burkholderia_cenocepacia_HI2424	|	Candidate_265_NC_008542	|	Bcen2424_2930		dienelactone hydrolase and related enzymes-like	*	>>>	134	|	3239747	3240114	>>>	367	|	-20	>>>	Bcen2424_2931	adenosylmethionine-8-amino-7-oxononanoate	*	candidate	842	1.1e-32	Y	3	-	Burkholderia_383_chromosome_1<>Burkholderia_cepacia_AMMD_chromosome_1<>Burkholderia_vietnamiensis_G4_chromosome_1	-	0	-	Cobalamin1_NC_002516|UD(5'(0-0)|3'(1-0)),P36_yes_NC_002516|3'(0),Cobalamin4_NC_002516|3'(0),SRP_bact_NC_003047|3'(0)	5	-	-
Burkholderia_cenocepacia_HI2424	|	Candidate_271_NC_008542	|	Bcen2424_3006		glutathione-disulfide reductase	*	<<<	86	|	3319730	3319883	<<<	153	|	0	<<<	Bcen2424_3007	hypothetical protein	*	candidate	751	1.4e-28	Z	3	RNA	Burkholderia_383_chromosome_1<>Burkholderia_cepacia_AMMD_chromosome_1<>Burkholderia_vietnamiensis_G4_chromosome_1	-	1	Candidate_154_NC_008542(para)	P11_yes_NC_002516|3'(0),P20_yes_NC_002516|3'(0)	-	RS	-
Burkholderia_cenocepacia_HI2424	|	Candidate_277_NC_008542	|	Bcen2424_3053		Ferredoxin--NADP(+) reductase	*	>>>	13	|	3368301	3368443	>>>	142	|	259	>>>	Bcen2424_3054	putative signal transduction histidine kinase	*	candidate	574	2.3e-20	F	12	RNA	Burkholderia_mallei_ATCC_23344_chromosome_1<>Burkholderia_pseudomallei_K96243_chromosome_1<>Burkholderia_pseudomallei_1710b_chromosome_1<>Burkholderia_383_chromosome_1<>Burkholderia_thailandensis_E264_chromosome_1<>Burkholderia_cepacia_AMMD_chromosome_1<>Burkholderia_mallei_SAVP1_chromosome_2<>Burkholderia_mallei_NCTC_10229_chromosome_2<>Burkholderia_pseudomallei_668_chromosome_1<>Burkholderia_ps…	-	0	-	Cobalamin1_NC_002516|UD(5'(1-0)|3'(0-0)),P15_yes_NC_002516|3'(0)	-	-	-
Burkholderia_cenocepacia_HI2424	|	Candidate_278_NC_008542	|	Bcen2424_3055		two component transcriptional regulator, LuxR	*	>>>	11	|	3370194	3370296	>>>	102	|	119	>>>	Bcen2424_3056	amino acid permease-associated region	*	candidate	533	3.5e-18	F	2	-	Burkholderia_cepacia_AMMD_chromosome_1<>Burkholderia_vietnamiensis_G4_chromosome_1	-	0	-	Cobalamin2_NC_002516|3'(0)	-	-	-
Burkholderia_cenocepacia_HI2424	|	Candidate_281_NC_008542	|	Bcen2424_3063		flagellar hook-basal body complex subunit FliE	*	<<<	11	|	3377350	3377470	>>>	120	|	101	>>>	Bcen2424_3064	flagellar M-ring protein FliF	*	candidate	537	2.1e-18	F	10	-	Burkholderia_mallei_ATCC_23344_chromosome_1<>Burkholderia_pseudomallei_K96243_chromosome_1<>Burkholderia_383_chromosome_1<>Burkholderia_cepacia_AMMD_chromosome_1<>Burkholderia_mallei_SAVP1_chromosome_2<>Burkholderia_mallei_NCTC_10229_chromosome_2<>Burkholderia_pseudomallei_668_chromosome_1<>Burkholderia_pseudomallei_1106a_chromosome_1<>Burkholderia_mallei_NCTC_10247_chromosome_2<>Burkholderia_vie…	-	0	Candidate_280_NC_008542(anti)	Cobalamin1_NC_002516|3'(0),P20_yes_NC_002516|3'(0),Cobalamin3_NC_002516|3'(0)	-	-	-
Burkholderia_cenocepacia_HI2424	|	Candidate_285_NC_008542	|	Bcen2424_3142		phosphonoacetate hydrolase	*	<<<	1	|	3460189	3460391	>>>	202	|	319	>>>	Bcen2424_3143	FAD dependent oxidoreductase	*	candidate	499	1.6e-16	F	1	-	Burkholderia_cepacia_AMMD_chromosome_1	-	0	-	Cobalamin1_NC_002516|3'(0)	-	-	-E.coli_sig70_2(8.39|-100)
Burkholderia_cenocepacia_HI2424	|	Candidate_304_NC_008542	|	Bcen2424_0409		ABC transporter domain protein	*	<<<	351	|	462733	462854	>>>	121	|	146	>>>	Bcen2424_0410	FAD dependent oxidoreductase	*	candidate	579	2.4e-20	F	8	RNA	Burkholderia_mallei_ATCC_23344_chromosome_1<>Burkholderia_pseudomallei_K96243_chromosome_1<>Burkholderia_pseudomallei_1710b_chromosome_1<>Burkholderia_383_chromosome_1<>Burkholderia_thailandensis_E264_chromosome_1<>Burkholderia_xenovorans_LB400_chromosome_1<>Burkholderia_cepacia_AMMD_chromosome_1<>Burkholderia_vietnamiensis_G4_chromosome_1	-	0	Candidate_303_NC_008542(anti)	Cobalamin1_NC_002516|UD(5'(1-0)|3'(0-0)),P15_yes_NC_002516|3'(0)	-	-	-
Burkholderia_cenocepacia_HI2424	|	Candidate_309_NC_008542	|	Bcen2424_0485		ImcF domain protein	*	<<<	189	|	544951	545062	<<<	111	|	0	<<<	Bcen2424_0486	peptidase M15B and M15C, D,D-carboxypeptidase	*	candidate	1280	4.7e-52	F	3	-	Burkholderia_383_chromosome_1<>Burkholderia_cepacia_AMMD_chromosome_1<>Burkholderia_vietnamiensis_G4_chromosome_1	-	0	-	P11_yes_NC_002516|3'(0),Cobalamin2_NC_002516|3'(0)	-	-	-
Burkholderia_cenocepacia_HI2424	|	Candidate_317_NC_008542	|	Bcen2424_0063		Lytic transglycosylase, catalytic	*	>>>	3	|	64971	65096	>>>	125	|	24	>>>	Bcen2424_0064	cobalamin synthesis protein, P47K	*	candidate	555	5e-19	Y	1	-	Burkholderia_383_chromosome_1	-	1	Candidate_44_NC_008542(para)	Cobalamin3_NC_002516|3'(0)	5	-	-
Burkholderia_cenocepacia_HI2424	|	Candidate_320_NC_008542	|	Bcen2424_0593		N-acetylmuramyl-L-alanine amidase, negative	*	>>>	48	|	664936	665296	>>>	360	|	43	>>>	Bcen2424_0594	ribonucleoside-diphosphate reductase, alpha	*	candidate	1717	5.6e-72	F	7	-	Burkholderia_mallei_ATCC_23344_chromosome_1<>Burkholderia_pseudomallei_K96243_chromosome_1<>Burkholderia_pseudomallei_1710b_chromosome_1<>Burkholderia_383_chromosome_1<>Burkholderia_thailandensis_E264_chromosome_1<>Burkholderia_cepacia_AMMD_chromosome_1<>Burkholderia_vietnamiensis_G4_chromosome_1	-	0	Candidate_319_NC_008542(anti)	Cobalamin2_NC_002516|3'(0),Cobalamin1_NC_002516|3'(0)	5	-	-
Burkholderia_cenocepacia_HI2424	|	Candidate_321_NC_008542	|	Bcen2424_0064		cobalamin synthesis protein, P47K	*	>>>	12	|	66447	66546	>>>	99	|	16	<<<	Bcen2424_0065	histone family protein DNA-binding protein	*	candidate	485	9.7e-16	Z	1	-	Burkholderia_383_chromosome_1	-	1	Candidate_207_NC_008542(para)	Cobalamin1_NC_002516|UD(5'(0-0)|3'(1-0))	-	-	-
Burkholderia_cenocepacia_HI2424	|	Candidate_338_NC_008542	|	Bcen2424_0738		phospho-2-dehydro-3-deoxyheptonate aldolase	*	<<<	132	|	824393	824649	<<<	256	|	9	<<<	Bcen2424_0739	peptidase U62, modulator of DNA gyrase	*	candidate	635	5.1e-23	Z	6	RNA	Burkholderia_pseudomallei_K96243_chromosome_1<>Burkholderia_pseudomallei_1710b_chromosome_1<>Burkholderia_383_chromosome_1<>Burkholderia_thailandensis_E264_chromosome_1<>Burkholderia_xenovorans_LB400_chromosome_1<>Burkholderia_vietnamiensis_G4_chromosome_1	-	0	Candidate_339_NC_008542(anti)	P15_yes_NC_002516|3'(0)	-	-	-E.coli_sig70_2(7.4|-163)
Burkholderia_cenocepacia_HI2424	|	Candidate_339_NC_008542	|	Bcen2424_0738		phospho-2-dehydro-3-deoxyheptonate aldolase	*	<<<	18	|	824279	824425	>>>	146	|	233	<<<	Bcen2424_0739	peptidase U62, modulator of DNA gyrase	*	candidate	980	1.2e-38	X	4	RNA	Burkholderia_pseudomallei_K96243_chromosome_1<>Burkholderia_383_chromosome_1<>Burkholderia_thailandensis_E264_chromosome_1<>Burkholderia_vietnamiensis_G4_chromosome_1	-	2	Candidate_338_NC_008542(anti),Candidate_290_NC_008542(para),Candidate_291_NC_008542(para)	P20_yes_NC_002516|3'(0)	-	-	-
Burkholderia_cenocepacia_HI2424	|	Candidate_348_NC_008542	|	Bcen2424_0840		hypothetical protein	*	>>>	103	|	945272	945526	>>>	254	|	258	>>>	Bcen2424_0841	peptidase S10, serine carboxypeptidase	*	candidate	302	4.7e-25	F	4	-	Burkholderia_pseudomallei_K96243_chromosome_1<>Burkholderia_pseudomallei_1710b_chromosome_1<>Burkholderia_383_chromosome_1<>Burkholderia_mallei_NCTC_10229_chromosome_2	-	0	-	Cobalamin1_NC_002516|3'(0)	-	-	-
Burkholderia_cenocepacia_HI2424	|	Candidate_1_NC_008543	|	Bcen2424_4688		hypothetical protein	*	<<<	3	|	1674584	1674764	>>>	180	|	192	<<<	Bcen2424_4689	Amidase	*	candidate	591	6.7e-21	R	2	-	Burkholderia_cepacia_AMMD_chromosome_2<>Burkholderia_vietnamiensis_G4_chromosome_2	-	0	-	Cobalamin1_NC_002516|3'(0)	-	-	-
Burkholderia_cenocepacia_HI2424	|	Candidate_5_NC_008543	|	Bcen2424_5122		coenzyme PQQ biosynthesis protein B	*	<<<	3	|	2155786	2155994	>>>	208	|	241	<<<	Bcen2424_5123	GAF modulated sigma54 specific transcriptional	*	candidate	887	1.8e-34	R	2	-	Burkholderia_cepacia_AMMD_chromosome_3<>Burkholderia_vietnamiensis_G4_chromosome_3	-	0	-	P36_yes_NC_002516|3'(0),P20_yes_NC_002516|3'(0)	-	-	-
Burkholderia_cenocepacia_HI2424	|	Candidate_6_NC_008543	|	Bcen2424_5496		hypothetical protein	*	<<<	1	|	2598111	2598168	>>>	57	|	115	<<<	Bcen2424_5497	hypothetical protein	*	candidate	674	6.8e-25	R	1	-	Burkholderia_383_chromosome_2	-	0	-	Cobalamin1_NC_002516|3'(0)	-	-	-
Burkholderia_cenocepacia_HI2424	|	Candidate_11_NC_008543	|	Bcen2424_3404		sodium/calcium exchanger membrane region	*	<<<	287	|	236087	236152	<<<	65	|	1	>>>	Bcen2424_3405	protein of unknown function DUF156	*	candidate	1031	6.2e-41	R	1	RNA	Burkholderia_383_chromosome_2	-	0	-	P20_yes_NC_002516|3'(0)	-	-	-
Burkholderia_cenocepacia_HI2424	|	Candidate_15_NC_008543	|	Bcen2424_3758		transcriptional regulator, MarR family	*	>>>	18	|	617376	617487	>>>	111	|	76	>>>	Bcen2424_3759	protein of unknown function DUF521	*	candidate	504	8.5e-17	T	1	-	Burkholderia_383_chromosome_2	-	0	-	Cobalamin1_NC_002516|3'(0)	5	-	-
Burkholderia_cenocepacia_HI2424	|	Candidate_19_NC_008543	|	Bcen2424_4563		peptidase S8 and S53, subtilisin, kexin,	*	>>>	8	|	1531491	1531878	>>>	387	|	-40	>>>	Bcen2424_4564	hypothetical protein	*	candidate	749	2.4e-28	T	8	RNA	Burkholderia_pseudomallei_K96243_chromosome_2<>Burkholderia_383_chromosome_2<>Burkholderia_thailandensis_E264_chromosome_2<>Burkholderia_cepacia_AMMD_chromosome_2<>Burkholderia_mallei_SAVP1_chromosome_1<>Burkholderia_mallei_NCTC_10229_chromosome_1<>Burkholderia_mallei_NCTC_10247_chromosome_1<>Burkholderia_vietnamiensis_G4_chromosome_2	-	0	-	Cobalamin3_NC_002516|UD(5'(0-0)|3'(1-1))	5	-	-E.coli_sig70_3(7.99|-230)
Burkholderia_cenocepacia_HI2424	|	Candidate_20_NC_008543	|	Bcen2424_4856		type III secretion FHIPEP protein	*	<<<	160	|	1858916	1858989	<<<	73	|	16	<<<	Bcen2424_4857	transcriptional regulator, LuxR family	*	candidate	661	6.6e-24	T	2	RNA	Burkholderia_cepacia_AMMD_chromosome_2<>Burkholderia_vietnamiensis_G4_chromosome_2	-	2	Candidate_58_NC_008543(opp),Candidate_56_NC_008543(para)	Cobalamin2_NC_002516|3'(0),P15_yes_NC_002516|3'(0),P20_yes_NC_002516|3'(0)	-	-	-
Burkholderia_cenocepacia_HI2424	|	Candidate_25_NC_008543	|	Bcen2424_5530		Citrate transporter	*	>>>	16	|	2636605	2636697	>>>	92	|	236	>>>	Bcen2424_5531	hypothetical protein	*	candidate	476	5.7e-16	T	1	-	Burkholderia_cepacia_AMMD_chromosome_2	-	0	-	P18_yes_NC_002516|UD(5'(1-0)|3'(1-1)),Cobalamin1_NC_002516|UD(5'(0-1)|3'(1-0))	-	-	-
Burkholderia_cenocepacia_HI2424	|	Candidate_29_NC_008543	|	Bcen2424_4156		choline/carnitine/betaine transporter	*	<<<	156	|	1068282	1068381	<<<	99	|	33	<<<	Bcen2424_4157	porin, Gram-negative type	*	candidate	654	7.3e-24	Z	2	-	Burkholderia_383_chromosome_2<>Burkholderia_cepacia_AMMD_chromosome_2	-	0	-	Cobalamin1_NC_002516|3'(0),P20_yes_NC_002516|3'(0),Cobalamin3_NC_002516|3'(0)	-	-	-
Burkholderia_cenocepacia_HI2424	|	Candidate_32_NC_008543	|	Bcen2424_4208		hypothetical protein	*	>>>	34	|	1136007	1136067	>>>	60	|	561	>>>	Bcen2424_4209	sigma54 specific transcriptional regulator, Fis	*	candidate	1998	8.4e-85	F	3	-	Burkholderia_383_chromosome_2<>Burkholderia_cepacia_AMMD_chromosome_2<>Burkholderia_vietnamiensis_G4_chromosome_2	-	1	Candidate_33_NC_008543(opp)	P36_yes_NC_002516|3'(0)	-	-	-
Burkholderia_cenocepacia_HI2424	|	Candidate_34_NC_008543	|	Bcen2424_4227		Peptidoglycan glycosyltransferase	*	<<<	315	|	1161515	1161618	<<<	103	|	1	<<<	Bcen2424_4228	hypothetical protein	*	candidate	1073	7.5e-43	Z	2	-	Burkholderia_383_chromosome_2<>Burkholderia_vietnamiensis_G4_chromosome_2	-	0	-	SRP_bact_NC_003047|3'(0)	-	-	-E.coli_sig70_1(7.25|-98)
Burkholderia_cenocepacia_HI2424	|	Candidate_35_NC_008543	|	Bcen2424_4294		cyclic nucleotide-binding protein	*	<<<	113	|	1236483	1236537	<<<	54	|	0	>>>	Bcen2424_4295	AMP-dependent synthetase and ligase	*	candidate	672	2.4e-24	F	2	-	Burkholderia_383_chromosome_2<>Burkholderia_vietnamiensis_G4_chromosome_2	-	0	-	SRP_bact_NC_002516|UD(5'(1-1)|3'(1-1))	-	-	-
Burkholderia_cenocepacia_HI2424	|	Candidate_36_NC_008543	|	Bcen2424_4324		Fusaric acid resistance protein conserved	*	<<<	-1	|	1269513	1269712	<<<	199	|	0	>>>	Bcen2424_4325	transcriptional regulator, LysR family	*	candidate	596	5.8e-21	F	3	-	Burkholderia_383_chromosome_2<>Burkholderia_cepacia_AMMD_chromosome_2<>Burkholderia_vietnamiensis_G4_chromosome_2	-	0	-	P20_yes_NC_002516|3'(0),Cobalamin1_NC_002516|3'(0),SRP_bact_NC_003047|3'(0)	5	-	-
Burkholderia_cenocepacia_HI2424	|	Candidate_38_NC_008543	|	Bcen2424_4360		proline racemase	*	>>>	24	|	1303618	1303707	>>>	89	|	81	>>>	Bcen2424_4361	Peptidoglycan glycosyltransferase	*	candidate	500	1.4e-16	Y	1	-	Burkholderia_383_chromosome_2	-	0	-	P20_yes_NC_002516|3'(0),Cobalamin1_NC_002516|3'(0),P11_yes_NC_002516|3'(0),P26_yes_NC_002516|3'(0)	-	-	-
Burkholderia_cenocepacia_HI2424	|	Candidate_43_NC_008543	|	Bcen2424_4439		TonB-dependent receptor	*	>>>	1	|	1390763	1390831	>>>	68	|	403	>>>	Bcen2424_4440	methyl-accepting chemotaxis sensory transducer	*	candidate	1082	2.6e-43	Y	1	-	Burkholderia_383_chromosome_2	-	0	-	P20_yes_NC_002516|3'(0)	-	-	-
Burkholderia_cenocepacia_HI2424	|	Candidate_44_NC_008543	|	Bcen2424_4516		drug resistance transporter, Bcr/CflA subfamily	*	<<<	-31	|	1471561	1471755	<<<	194	|	0	<<<	Bcen2424_4517	peptidase S1 and S6, chymotrypsin/Hap	*	candidate	484	6.7e-16	X	1	-	Burkholderia_383_chromosome_2	-	0	-	P15_yes_NC_002516|UD(5'(0-0)|3'(0-1))	5	-	-E.coli_sig70_3(8.25|-161)
Burkholderia_cenocepacia_HI2424	|	Candidate_46_NC_008543	|	Bcen2424_4665		methyl-accepting chemotaxis sensory transducer	*	<<<	16	|	1649875	1650073	<<<	198	|	0	>>>	Bcen2424_4666	drug resistance transporter, EmrB/QacA	*	candidate	527	6.2e-18	X	3	-	Burkholderia_383_chromosome_2<>Burkholderia_cepacia_AMMD_chromosome_2<>Burkholderia_vietnamiensis_G4_chromosome_2	-	0	-	sokB_NC_000913|3'(0)	5	-	-
Burkholderia_cenocepacia_HI2424	|	Candidate_57_NC_008543	|	Bcen2424_4856		type III secretion FHIPEP protein	*	<<<	99	|	1858855	1858989	<<<	134	|	16	<<<	Bcen2424_4857	transcriptional regulator, LuxR family	*	candidate	661	6.6e-24	X	2	RNA	Burkholderia_cepacia_AMMD_chromosome_2<>Burkholderia_vietnamiensis_G4_chromosome_2	-	1	Candidate_58_NC_008543(anti),Candidate_56_NC_008543(para)	Cobalamin2_NC_002516|3'(0),P15_yes_NC_002516|3'(0),P20_yes_NC_002516|3'(0)	-	RS	-
Burkholderia_cenocepacia_HI2424	|	Candidate_66_NC_008543	|	Bcen2424_5046		hypothetical protein	*	>>>	1	|	2072199	2072285	>>>	86	|	105	<<<	Bcen2424_5047	Gamma-butyrobetaine dioxygenase	*	candidate	569	9.7e-20	Z	3	RNA	Burkholderia_383_chromosome_2<>Burkholderia_cepacia_AMMD_chromosome_2<>Burkholderia_vietnamiensis_G4_chromosome_2	-	0	-	P20_yes_NC_002516|3'(0)	-	-	-
Burkholderia_cenocepacia_HI2424	|	Candidate_67_NC_008543	|	Bcen2424_5046		hypothetical protein	*	>>>	1	|	2072199	2072355	>>>	156	|	35	<<<	Bcen2424_5047	Gamma-butyrobetaine dioxygenase	*	candidate	569	9.7e-20	Z	3	RNA	Burkholderia_383_chromosome_2<>Burkholderia_cepacia_AMMD_chromosome_2<>Burkholderia_vietnamiensis_G4_chromosome_2	-	0	-	P20_yes_NC_002516|3'(0)	-	-	-
Burkholderia_cenocepacia_HI2424	|	Candidate_69_NC_008543	|	Bcen2424_5108		ABC-2 type transporter	*	>>>	7	|	2143398	2143537	>>>	139	|	14	>>>	Bcen2424_5109	major facilitator superfamily MFS_1	*	candidate	648	3.1e-23	Y	1	RNA	Burkholderia_383_chromosome_2	-	0	-	P20_yes_NC_002516|3'(0)	5	-	-
Burkholderia_cenocepacia_HI2424	|	Candidate_71_NC_008543	|	Bcen2424_5172		glycine betaine/L-proline ABC transporter,	*	<<<	358	|	2220450	2220617	<<<	167	|	80	>>>	Bcen2424_5173	membrane protein-like protein	*	candidate	596	1.4e-21	F	4	-	Burkholderia_pseudomallei_K96243_chromosome_2<>Burkholderia_pseudomallei_1710b_chromosome_2<>Burkholderia_cepacia_AMMD_chromosome_2<>Burkholderia_vietnamiensis_G4_chromosome_2	-	0	-	Cobalamin2_NC_002516|UD(5'(1-1)|3'(0-1))	-	-	-
Burkholderia_cenocepacia_HI2424	|	Candidate_74_NC_008543	|	Bcen2424_5266		major facilitator superfamily MFS_1	*	<<<	14	|	2341651	2341812	>>>	161	|	280	>>>	Bcen2424_5267	MscS Mechanosensitive ion channel	*	candidate	589	5.2e-21	F	2	-	Burkholderia_383_chromosome_2<>Burkholderia_vietnamiensis_G4_chromosome_2	-	0	-	P20_yes_NC_002516|3'(0),Cobalamin2_NC_002516|3'(0)	-	-	-
Burkholderia_cenocepacia_HI2424	|	Candidate_75_NC_008543	|	Bcen2424_5304		3-dehydroquinate dehydratase, type II	*	<<<	5	|	2393723	2393820	>>>	97	|	154	>>>	Bcen2424_5305	4-hydroxyphenylpyruvate dioxygenase	*	candidate	807	1.3e-30	X	3	-	Burkholderia_383_chromosome_2<>Burkholderia_cepacia_AMMD_chromosome_2<>Burkholderia_vietnamiensis_G4_chromosome_2	-	0	-	P30_yes_NC_002516|3'(0),P20_yes_NC_002516|3'(0),Cobalamin2_NC_002516|3'(0),P34_yes_NC_002516|3'(0)	-	-	-
Burkholderia_cenocepacia_HI2424	|	Candidate_80_NC_008543	|	Bcen2424_5430		hypothetical protein	*	>>>	2	|	2528758	2528827	>>>	69	|	155	>>>	Bcen2424_5431	TonB-dependent	*	candidate	777	3.2e-29	F	2	RNA	Burkholderia_383_chromosome_2<>Burkholderia_cepacia_AMMD_chromosome_2	-	0	-	Cobalamin2_NC_002516|3'(0),P11_yes_NC_002516|3'(0)	-	-	-
Burkholderia_cenocepacia_HI2424	|	Candidate_83_NC_008543	|	Bcen2424_5532		Thioredoxin domain	*	<<<	115	|	2638936	2639079	<<<	143	|	1	<<<	Bcen2424_5533	GCN5-related N-acetyltransferase	*	candidate	660	7.2e-24	F	1	-	Burkholderia_383_chromosome_2	-	0	-	Cobalamin1_NC_002516|UD(5'(1-0)|3'(0-0)),Cobalamin2_NC_002516|3'(0)	-	-	-
Burkholderia_cenocepacia_HI2424	|	Candidate_84_NC_008543	|	Bcen2424_5533		GCN5-related N-acetyltransferase	*	<<<	4	|	2639586	2640035	>>>	449	|	138	>>>	Bcen2424_5534	Phospholipase C	*	candidate	491	1.1e-16	F	2	RNA	Burkholderia_383_chromosome_2<>Burkholderia_cepacia_AMMD_chromosome_2	-	0	-	P26_yes_NC_002516|3'(0),P15_yes_NC_002516|3'(0)	-	-	-
Burkholderia_cenocepacia_HI2424	|	Candidate_91_NC_008543	|	Bcen2424_5789		hypothetical protein	*	<<<	5	|	2913613	2913703	>>>	90	|	209	>>>	Bcen2424_5790	putative integral membrane sensor protein	*	candidate	481	8.6e-16	F	2	-	Burkholderia_383_chromosome_2<>Burkholderia_cepacia_AMMD_chromosome_2	-	0	-	SRP_bact_NC_003047|3'(0)	-	-	-
Burkholderia_cenocepacia_HI2424	|	Candidate_97_NC_008543	|	Bcen2424_3619		Rieske (2Fe-2S) domain protein	*	<<<	22	|	465398	465515	<<<	117	|	0	>>>	Bcen2424_3620	transcriptional regulator, LysR family	*	candidate	613	1.4e-21	F	1	-	Burkholderia_cepacia_AMMD_chromosome_2	-	0	-	Cobalamin1_NC_003047|3'(0)	5	-	-
Burkholderia_cenocepacia_HI2424	|	Candidate_98_NC_008543	|	Bcen2424_3622		major facilitator superfamily MFS_1	*	<<<	24	|	469198	469573	<<<	375	|	10	>>>	Bcen2424_3623	porin, Gram-negative type	*	candidate	728	3.3e-27	F	3	RNA	Burkholderia_383_chromosome_2<>Burkholderia_thailandensis_E264_chromosome_2<>Burkholderia_cepacia_AMMD_chromosome_2	-	0	-	Cobalamin1_NC_002516|3'(0)	5	-	-
Burkholderia_cenocepacia_HI2424	|	Candidate_104_NC_008543	|	Bcen2424_3783		aldehyde dehydrogenase	*	>>>	4	|	642499	642564	>>>	65	|	159	>>>	Bcen2424_3784	Na+/H+ antiporter	*	candidate	775	3.8e-29	Y	1	RNA	Burkholderia_383_chromosome_2	-	2	Candidate_7_NC_008543(para),Candidate_85_NC_008543(para)	P20_yes_NC_002516|3'(0)	-	-	-
Burkholderia_cenocepacia_HI2424	|	Candidate_105_NC_008543	|	Bcen2424_3785		response regulator receiver sensor signal	*	>>>	1	|	645927	646018	>>>	91	|	31	>>>	Bcen2424_3786	methyl-accepting chemotaxis sensory transducer	*	candidate	542	2.5e-18	F	1	RNA	Burkholderia_383_chromosome_2	-	0	-	Cobalamin1_NC_002516|UD(5'(1-1)|3'(0-0)),P20_yes_NC_002516|3'(0),Cobalamin2_NC_002516|3'(0)	5	-	-
Burkholderia_cenocepacia_HI2424	|	Candidate_108_NC_008543	|	Bcen2424_3810		Endonuclease/exonuclease/phosphatase	*	<<<	113	|	673695	673850	<<<	155	|	0	>>>	Bcen2424_3811	DGPFAETKE family protein	*	candidate	678	1.1e-24	F	1	RNA	Burkholderia_383_chromosome_2	-	0	-	Cobalamin1_NC_002516|3'(0),SRP_bact_NC_003047|3'(0)	-	-	-
Burkholderia_cenocepacia_HI2424	|	Candidate_118_NC_008543	|	Bcen2424_3954		flagellar basal body FlaE domain protein	*	<<<	584	|	835263	835415	>>>	152	|	74	>>>	Bcen2424_3955	hypothetical protein	*	candidate	771	5.2e-29	X	2	RNA	Burkholderia_cepacia_AMMD_chromosome_2<>Burkholderia_vietnamiensis_G4_chromosome_2	-	0	-	P34_yes_NC_002516|3'(0),P15_yes_NC_002516|3'(0)	5	-	-
Burkholderia_cenocepacia_HI2424	|	Candidate_5_NC_008544	|	Bcen2424_6429		hypothetical protein	*	>>>	21	|	644069	644180	>>>	111	|	246	>>>	Bcen2424_6430	transcriptional regulator, GntR family	*	candidate	1252	6.6e-51	T	2	-	Burkholderia_383_chromosome_3<>Burkholderia_cepacia_AMMD_chromosome_3	-	0	-	P20_yes_NC_002516|3'(0)	-	-	-
Burkholderia_cenocepacia_HI2424	|	Candidate_12_NC_008544	|	Bcen2424_6273		transcriptional regulator, AraC family	*	>>>	197	|	454242	454312	>>>	70	|	135	>>>	Bcen2424_6274	acyl-CoA dehydrogenase domain protein	*	candidate	521	5.6e-18	F	1	COD	Burkholderia_cepacia_AMMD_chromosome_3	-	0	-	Cobalamin1_NC_002516|3'(0)	-	-	-
Burkholderia_cenocepacia_HI2424	|	Candidate_14_NC_008544	|	Bcen2424_6349		transcriptional regulator, AraC family	*	<<<	1	|	539980	540231	>>>	251	|	145	>>>	Bcen2424_6350	transcriptional regulator, winged helix family	*	candidate	989	4.9e-39	F	1	-	Burkholderia_vietnamiensis_G4_chromosome_3	-	0	-	P20_yes_NC_002516|3'(0),Cobalamin1_NC_002516|3'(0),Cobalamin2_NC_002516|3'(0),SRP_bact_NC_003047|3'(0),P34_yes_NC_002516|3'(0),Cobalamin3_NC_002516|3'(0),THI_NC_002516|3'(0),P11_yes_NC_002516|3'(0),P30_yes_NC_002516|3'(0)	-	-	-
Burkholderia_cepacia_AMMD	|	Candidate_2_NC_008385	|	Bamb_6603		parB-like partition proteins	*	>>>	2	|	10308	10390	>>>	82	|	94	>>>	Bamb_6604	hypothetical protein	*	candidate	210	3.2e-21	Z	2	RNA	Ralstonia_eutropha_JMP134_plasmid_1<>Acidovorax_JS42_plasmid_pAOVO02	-	0	-	P15_yes_NC_002516|3'(0)	-	-	-
Burkholderia_cepacia_AMMD	|	Candidate_20_NC_008390	|	Bamb_0102		primosomal protein N'	*	>>>	17	|	116489	116750	>>>	261	|	71	>>>	Bamb_0103	delta-1-pyrroline-5-carboxylate dehydrogenase	*	candidate	954	2.2e-37	T	4	-	Burkholderia_383_chromosome_1<>Burkholderia_cenocepacia_AU_1054_chromosome_1<>Burkholderia_cenocepacia_HI2424_chromosome_1<>Burkholderia_vietnamiensis_G4_chromosome_1	-	0	-	Cobalamin1_NC_002516|UD(5'(0-0)|3'(0-0)),P36_yes_NC_002516|UD(5'(0-0)|3'(0-1)),Cobalamin2_NC_002516|3'(0),P11_yes_NC_002516|3'(0),SRP_bact_NC_003047|3'(0),P34_yes_NC_002516|3'(0),P20_yes_NC_002516|3'(0)	5	-	-
Burkholderia_cepacia_AMMD	|	Candidate_35_NC_008390	|	Bamb_1790		molybdenum cofactor synthesis domain	*	<<<	160	|	1978495	1978577	<<<	82	|	7	<<<	Bamb_1791	threonine synthase	*	candidate	809	1.1e-30	T	3	RNA	Burkholderia_383_chromosome_1<>Burkholderia_cenocepacia_AU_1054_chromosome_3<>Burkholderia_cenocepacia_HI2424_chromosome_1	-	0	-	P28_yes_NC_002516|3'(0)	-	-	-
Burkholderia_cepacia_AMMD	|	Candidate_39_NC_008390	|	Bamb_2568		cold-shock DNA-binding domain protein	*	>>>	1	|	2827840	2827930	>>>	90	|	84	<<<	Bamb_2569	multicopper oxidase, type 3	*	candidate	683	7.3e-25	T	4	RNA	Burkholderia_383_chromosome_1<>Burkholderia_cenocepacia_AU_1054_chromosome_1<>Burkholderia_cenocepacia_HI2424_chromosome_1<>Burkholderia_vietnamiensis_G4_chromosome_1	-	0	Candidate_38_NC_008390(anti)	Cobalamin1_NC_002516|3'(0)	-	-	-
Burkholderia_cepacia_AMMD	|	Candidate_43_NC_008390	|	Bamb_2979		dienelactone hydrolase and related enzyme-like	*	>>>	507	|	3288418	3288495	>>>	77	|	199	>>>	Bamb_2980	adenosylmethionine-8-amino-7-oxononanoate	*	candidate	847	1.3e-32	T	4	-	Burkholderia_383_chromosome_1<>Burkholderia_cenocepacia_AU_1054_chromosome_1<>Burkholderia_cenocepacia_HI2424_chromosome_1<>Burkholderia_vietnamiensis_G4_chromosome_1	-	0	-	P20_yes_NC_002516|3'(0),P15_yes_NC_002516|3'(0),SRP_bact_NC_003047|3'(0)	-	-	-
Burkholderia_cepacia_AMMD	|	Candidate_45_NC_008390	|	Bamb_3103		PepSY-associated TM helix domain protein	*	<<<	60	|	3425841	3426075	<<<	234	|	8	<<<	Bamb_3104	putative flagellar protein FhlB	*	candidate	503	6.6e-17	T	3	RNA	Burkholderia_383_chromosome_1<>Burkholderia_cenocepacia_AU_1054_chromosome_1<>Burkholderia_cenocepacia_HI2424_chromosome_1	-	0	-	P15_yes_NC_002516|UD(5'(1-0)|3'(1-1))	-	-	-
Burkholderia_cepacia_AMMD	|	Candidate_54_NC_008390	|	Bamb_0985		molybdenum cofactor biosynthesis protein A	*	<<<	1	|	1075484	1075594	>>>	110	|	19	<<<	Bamb_0986	ribonuclease, Rne/Rng family	*	candidate	551	9.1e-19	X	3	RNA	Burkholderia_383_chromosome_1<>Burkholderia_cenocepacia_AU_1054_chromosome_1<>Burkholderia_cenocepacia_HI2424_chromosome_1	-	2	Candidate_88_NC_008390(para),Candidate_118_NC_008390(para)	rne5_NC_000913|3'(0),Cobalamin1_NC_002516|3'(0)	-	-	-
Burkholderia_cepacia_AMMD	|	Candidate_68_NC_008390	|	Bamb_1096		protein of unknown function DUF893, YccS/YhfK	*	<<<	1	|	1199588	1199708	>>>	120	|	58	>>>	Bamb_1097	exodeoxyribonuclease V, gamma subunit	*	candidate	678	1.2e-24	F	4	-	Burkholderia_383_chromosome_1<>Burkholderia_cenocepacia_AU_1054_chromosome_1<>Burkholderia_cenocepacia_HI2424_chromosome_1<>Burkholderia_vietnamiensis_G4_chromosome_1	-	0	-	Cobalamin4_NC_002516|UD(5'(0-1)|3'(0-0)),P18_yes_NC_002516|UD(5'(0-0)|3'(0-1)),Cobalamin1_NC_002516|3'(0),Cobalamin2_NC_002516|3'(0),P34_yes_NC_002516|3'(0),P26_yes_NC_002516|3'(0)	5	-	-
Burkholderia_cepacia_AMMD	|	Candidate_70_NC_008390	|	Bamb_1110		protein of unknown function DUF891	*	<<<	44	|	1218346	1218634	>>>	288	|	162	>>>	Bamb_1111	protein of unknown function DUF6, transmembrane	*	candidate	1064	1.8e-42	X	4	-	Burkholderia_383_chromosome_1<>Burkholderia_cenocepacia_AU_1054_chromosome_1<>Burkholderia_cenocepacia_HI2424_chromosome_1<>Burkholderia_vietnamiensis_G4_chromosome_1	-	0	-	P20_yes_NC_002516|3'(0),SRP_bact_NC_003047|3'(0)	-	-	-
Burkholderia_cepacia_AMMD	|	Candidate_72_NC_008390	|	Bamb_1134		major facilitator superfamily MFS_1	*	<<<	237	|	1246325	1246617	<<<	292	|	45	<<<	Bamb_1135	transcriptional regulator, LysR family	*	candidate	902	3.4e-35	Y	4	RNA	Burkholderia_383_chromosome_1<>Burkholderia_cenocepacia_AU_1054_chromosome_1<>Burkholderia_cenocepacia_HI2424_chromosome_1<>Burkholderia_vietnamiensis_G4_chromosome_1	-	0	-	P20_yes_NC_002516|3'(0),Cobalamin4_NC_002516|3'(0),Cobalamin1_NC_002516|3'(0)	-	-	-
Burkholderia_cepacia_AMMD	|	Candidate_73_NC_008390	|	Bamb_1166		major facilitator superfamily MFS_1	*	>>>	39	|	1275561	1275634	>>>	73	|	244	>>>	Bamb_1167	carbamoyl-phosphate synthase, small subunit	*	candidate	843	2.1e-32	F	11	RNA	Burkholderia_mallei_ATCC_23344_chromosome_1<>Burkholderia_pseudomallei_K96243_chromosome_1<>Burkholderia_pseudomallei_1710b_chromosome_1<>Burkholderia_383_chromosome_1<>Burkholderia_thailandensis_E264_chromosome_1<>Burkholderia_cenocepacia_AU_1054_chromosome_1<>Burkholderia_cenocepacia_HI2424_chromosome_1<>Burkholderia_mallei_SAVP1_chromosome_2<>Burkholderia_mallei_NCTC_10229_chromosome_2<>Burkho…	-	0	-	P32_yes_NC_002516|3'(0)	-	-	-
Burkholderia_cepacia_AMMD	|	Candidate_80_NC_008390	|	Bamb_1326		major facilitator superfamily MFS_1	*	<<<	1	|	1457804	1457981	>>>	177	|	216	>>>	Bamb_1327	methyl-accepting chemotaxis sensory transducer	*	candidate	609	7.1e-22	F	4	-	Burkholderia_383_chromosome_1<>Burkholderia_cenocepacia_AU_1054_chromosome_1<>Burkholderia_cenocepacia_HI2424_chromosome_1<>Burkholderia_vietnamiensis_G4_chromosome_1	-	0	-	sokB_NC_000913|3'(0),Cobalamin1_NC_002516|3'(0),Cobalamin2_NC_002516|3'(0),P20_yes_NC_002516|3'(0)	-	-	-
Burkholderia_cepacia_AMMD	|	Candidate_82_NC_008390	|	Bamb_1339		putative transcriptional regulator, XRE family	*	>>>	3	|	1472002	1472084	>>>	82	|	56	>>>	Bamb_1340	phospholipid/glycerol acyltransferase	*	candidate	559	3.8e-19	Z	2	RNA	Burkholderia_383_chromosome_1<>Burkholderia_vietnamiensis_G4_chromosome_1	-	0	-	P20_yes_NC_002516|3'(0)	5	-	-
Burkholderia_cepacia_AMMD	|	Candidate_84_NC_008390	|	trRNA		trRNA	*	>>>	12	|	1492861	1493044	>>>	183	|	74	>>>	Bamb_1359	threonyl-tRNA synthetase	*	candidate	785	1.2e-29	Z	11	RNA	Burkholderia_mallei_ATCC_23344_chromosome_1<>Burkholderia_pseudomallei_K96243_chromosome_1<>Burkholderia_383_chromosome_1<>Burkholderia_thailandensis_E264_chromosome_1<>Burkholderia_xenovorans_LB400_chromosome_1<>Burkholderia_mallei_SAVP1_chromosome_2<>Burkholderia_mallei_NCTC_10229_chromosome_2<>Burkholderia_pseudomallei_668_chromosome_1<>Burkholderia_pseudomallei_1106a_chromosome_1<>Burkholderi…	-	0	-	T1box15_NC_000964|3'(0),T1box16_NC_000964|3'(0),T1box17_NC_000964|3'(0),T1box12_NC_000964|3'(0),T1box6_NC_003210|3'(0),T1box8_NC_002745|3'(0)	5	-	-E.coli_sig70_2(11.14|-284)
Burkholderia_cepacia_AMMD	|	Candidate_102_NC_008390	|	Bamb_1513		metabolite/H+ symporter, major facilitator	*	>>>	13	|	1661229	1661300	>>>	71	|	275	>>>	Bamb_1514	Rhomboid family protein	*	candidate	825	1.4e-31	Y	2	RNA	Burkholderia_pseudomallei_K96243_chromosome_1<>Burkholderia_vietnamiensis_G4_chromosome_1	-	1	Candidate_103_NC_008390(tandem)	P34_yes_NC_002516|3'(0)	-	-	-
Burkholderia_cepacia_AMMD	|	Candidate_103_NC_008390	|	Bamb_1513		metabolite/H+ symporter, major facilitator	*	>>>	96	|	1661312	1661472	>>>	160	|	103	>>>	Bamb_1514	Rhomboid family protein	*	candidate	517	9e-18	Z	5	RNA	Burkholderia_pseudomallei_K96243_chromosome_1<>Burkholderia_thailandensis_E264_chromosome_1<>Burkholderia_cenocepacia_AU_1054_chromosome_1<>Burkholderia_cenocepacia_HI2424_chromosome_1<>Burkholderia_vietnamiensis_G4_chromosome_1	-	1	Candidate_102_NC_008390(tandem)	P34_yes_NC_002516|3'(0)	-	-	-
Burkholderia_cepacia_AMMD	|	Candidate_104_NC_008390	|	Bamb_1518		peptidase M23B	*	<<<	86	|	1667491	1667716	<<<	225	|	17	<<<	Bamb_1519	transcriptional regulator, TetR family	*	candidate	1154	2.3e-46	Z	4	RNA	Burkholderia_383_chromosome_1<>Burkholderia_cenocepacia_AU_1054_chromosome_1<>Burkholderia_cenocepacia_HI2424_chromosome_1<>Burkholderia_vietnamiensis_G4_chromosome_1	-	0	-	P20_yes_NC_002516|3'(0)	-	-	-
Burkholderia_cepacia_AMMD	|	Candidate_112_NC_008390	|	Bamb_1771		ribosomal protein L31	*	>>>	1	|	1958584	1958655	>>>	71	|	143	>>>	Bamb_1772	4-amino-4-deoxy-L-arabinose transferase and	*	candidate	676	1.2e-24	Z	4	RNA	Burkholderia_383_chromosome_1<>Burkholderia_cenocepacia_AU_1054_chromosome_3<>Burkholderia_cenocepacia_HI2424_chromosome_1<>Burkholderia_vietnamiensis_G4_chromosome_1	-	0	Candidate_111_NC_008390(anti)	P20_yes_NC_002516|3'(0),P15_yes_NC_002516|3'(0)	-	-	-
Burkholderia_cepacia_AMMD	|	Candidate_118_NC_008390	|	Bamb_1908		PpiC-type peptidyl-prolyl cis-trans isomerase	*	<<<	103	|	2100702	2100868	<<<	166	|	52	<<<	trRNA	trRNA	*	candidate	545	9.7e-19	Z	5	RNA	Burkholderia_383_chromosome_1<>Burkholderia_cenocepacia_AU_1054_chromosome_3<>Ralstonia_eutropha_H16_chromosome_1<>Burkholderia_cenocepacia_HI2424_chromosome_1<>Burkholderia_vietnamiensis_G4_chromosome_1	-	1	Candidate_54_NC_008390(para)	P20_yes_NC_002516|3'(0),Cobalamin1_NC_002516|3'(0)	-	-	-
Burkholderia_cepacia_AMMD	|	Candidate_119_NC_008390	|	Bamb_1912		trigger factor	*	<<<	1	|	2107513	2107869	>>>	356	|	26	>>>	Bamb_1913	Glycerate kinase	*	candidate	340	1.2e-58	F	4	-	Burkholderia_383_chromosome_1<>Burkholderia_cenocepacia_AU_1054_chromosome_3<>Burkholderia_cenocepacia_HI2424_chromosome_1<>Burkholderia_vietnamiensis_G4_chromosome_1	-	0	-	Cobalamin1_NC_002516|3'(0),SRP_bact_NC_003047|3'(0),P15_yes_NC_002516|3'(0)	5	-	-
Burkholderia_cepacia_AMMD	|	Candidate_143_NC_008390	|	Bamb_2239		Biopolymer transport protein ExbD/TolR	*	>>>	21	|	2472764	2472827	>>>	63	|	280	<<<	Bamb_2240	transcriptional regulator, LysR family	*	candidate	1009	6.8e-40	Z	8	RNA	Burkholderia_pseudomallei_K96243_chromosome_2<>Burkholderia_pseudomallei_1710b_chromosome_2<>Burkholderia_383_chromosome_1<>Burkholderia_thailandensis_E264_chromosome_2<>Burkholderia_cenocepacia_AU_1054_chromosome_3<>Burkholderia_cenocepacia_HI2424_chromosome_1<>Burkholderia_pseudomallei_668_chromosome_2<>Burkholderia_vietnamiensis_G4_chromosome_1	-	0	Candidate_142_NC_008390(anti)	Cobalamin1_NC_002516|3'(0)	-	-	-
Burkholderia_cepacia_AMMD	|	Candidate_153_NC_008390	|	Bamb_2323		osmosensitive K+ channel signal transduction	*	<<<	61	|	2561038	2561120	<<<	82	|	1	<<<	Bamb_2324	potassium-transporting ATPase, C subunit	*	candidate	513	4.1e-17	X	2	RNA	Burkholderia_cenocepacia_AU_1054_chromosome_1<>Burkholderia_cenocepacia_HI2424_chromosome_1	-	0	-	P15_yes_NC_002516|UD(5'(1-0)|3'(0-1)),Cobalamin2_NC_002516|3'(0),Cobalamin1_NC_002516|3'(0),P20_yes_NC_002516|3'(0),SRP_bact_NC_003047|3'(0),THI_NC_002516|3'(0),PrrF_NC_002516|3'(0),Prrf1_NC_002516|3'(0),Prrf2_NC_002516|3'(0)	-	-	-
Burkholderia_cepacia_AMMD	|	Candidate_154_NC_008390	|	Bamb_2346		lipid A ABC exporter, fused ATPase and inner	*	<<<	31	|	2584059	2584231	>>>	172	|	20	>>>	Bamb_2347	glycosyl transferase, family 2	*	candidate	531	5.4e-18	F	3	RNA	Burkholderia_383_chromosome_1<>Burkholderia_cenocepacia_HI2424_chromosome_1<>Burkholderia_vietnamiensis_G4_chromosome_1	-	0	-	Cobalamin1_NC_002516|3'(0)	5	-	-
Burkholderia_cepacia_AMMD	|	Candidate_155_NC_008390	|	Bamb_2355		DEAD/DEAH box helicase domain protein	*	<<<	370	|	2598326	2598405	<<<	79	|	51	<<<	Bamb_2356	periplasmic protein	*	candidate	930	2.4e-36	F	4	-	Burkholderia_383_chromosome_1<>Burkholderia_cenocepacia_AU_1054_chromosome_1<>Burkholderia_cenocepacia_HI2424_chromosome_1<>Burkholderia_vietnamiensis_G4_chromosome_1	-	1	Candidate_65_NC_008390(para)	C0343_NC_000913|3'(0)	-	-	-
Burkholderia_cepacia_AMMD	|	Candidate_171_NC_008390	|	Bamb_2483		OmpA/MotB domain protein	*	>>>	35	|	2739635	2739812	>>>	177	|	163	>>>	Bamb_2484	methionyl-tRNA synthetase	*	candidate	610	1.3e-21	Z	12	RNA	Burkholderia_pseudomallei_K96243_chromosome_1<>Burkholderia_pseudomallei_1710b_chromosome_1<>Burkholderia_383_chromosome_1<>Burkholderia_thailandensis_E264_chromosome_1<>Burkholderia_xenovorans_LB400_chromosome_1<>Burkholderia_cenocepacia_HI2424_chromosome_1<>Burkholderia_mallei_SAVP1_chromosome_2<>Burkholderia_mallei_NCTC_10229_chromosome_2<>Burkholderia_pseudomallei_668_chromosome_1<>Burkholder…	-	0	-	P18_yes_NC_002516|UD(5'(1-0)|3'(1-1))	-	-	-
Burkholderia_cepacia_AMMD	|	Candidate_182_NC_008390	|	Bamb_2599		integral membrane protein MviN	*	<<<	47	|	2863489	2863745	<<<	256	|	0	>>>	Bamb_2600	ribosomal protein S20	*	candidate	1227	1.2e-49	F	8	-	Burkholderia_mallei_ATCC_23344_chromosome_1<>Burkholderia_pseudomallei_K96243_chromosome_1<>Burkholderia_383_chromosome_1<>Burkholderia_thailandensis_E264_chromosome_1<>Burkholderia_cenocepacia_AU_1054_chromosome_1<>Burkholderia_cenocepacia_HI2424_chromosome_1<>Burkholderia_mallei_SAVP1_chromosome_2<>Burkholderia_vietnamiensis_G4_chromosome_1	-	0	-	P20_yes_NC_002516|3'(0)	-	-	-
Burkholderia_cepacia_AMMD	|	Candidate_183_NC_008390	|	Bamb_2599		integral membrane protein MviN	*	<<<	241	|	2863683	2863745	<<<	62	|	0	>>>	Bamb_2600	ribosomal protein S20	*	candidate	1227	1.2e-49	F	13	-	Burkholderia_mallei_ATCC_23344_chromosome_1<>Burkholderia_pseudomallei_K96243_chromosome_1<>Burkholderia_pseudomallei_1710b_chromosome_1<>Burkholderia_383_chromosome_1<>Burkholderia_thailandensis_E264_chromosome_1<>Burkholderia_cenocepacia_AU_1054_chromosome_1<>Burkholderia_cenocepacia_HI2424_chromosome_1<>Burkholderia_mallei_SAVP1_chromosome_2<>Burkholderia_mallei_NCTC_10229_chromosome_2<>Burkho…	-	0	-	P20_yes_NC_002516|3'(0)	-	-	-
Burkholderia_cepacia_AMMD	|	Candidate_191_NC_008390	|	Bamb_2673		fructose-bisphosphate aldolase, class II, Calvin	*	<<<	1	|	2945391	2945625	>>>	234	|	60	<<<	Bamb_2674	Pyruvate kinase	*	candidate	1097	8.8e-44	X	13	RNA	Burkholderia_mallei_ATCC_23344_chromosome_1<>Burkholderia_pseudomallei_K96243_chromosome_1<>Burkholderia_pseudomallei_1710b_chromosome_1<>Burkholderia_383_chromosome_1<>Burkholderia_thailandensis_E264_chromosome_1<>Burkholderia_cenocepacia_AU_1054_chromosome_1<>Burkholderia_cenocepacia_HI2424_chromosome_1<>Burkholderia_mallei_SAVP1_chromosome_2<>Burkholderia_mallei_NCTC_10229_chromosome_2<>Burkho…	-	0	Candidate_189_NC_008390(anti),Candidate_190_NC_008390(anti)	P34_yes_NC_002516|3'(0)	-	-	-
Burkholderia_cepacia_AMMD	|	Candidate_204_NC_008390	|	Bamb_0260		DNA-directed RNA polymerase, beta' subunit	*	>>>	8	|	312014	312088	>>>	74	|	160	>>>	Bamb_0261	ATP-dependent DNA helicase RecQ	*	candidate	921	9.7e-36	Z	1	RNA	Burkholderia_vietnamiensis_G4_chromosome_1	-	0	-	Cobalamin1_NC_002516|3'(0),P20_yes_NC_002516|3'(0)	-	-	-
Burkholderia_cepacia_AMMD	|	Candidate_209_NC_008390	|	Bamb_2879		cyd operon protein YbgT	*	>>>	31	|	3173117	3173171	>>>	54	|	507	>>>	Bamb_2880	Beta-N-acetylhexosaminidase	*	candidate	800	1.1e-30	Z	5	-	Burkholderia_383_chromosome_1<>Burkholderia_thailandensis_E264_chromosome_1<>Burkholderia_cenocepacia_AU_1054_chromosome_1<>Burkholderia_cenocepacia_HI2424_chromosome_1<>Burkholderia_vietnamiensis_G4_chromosome_1	-	0	-	Cobalamin1_NC_002516|3'(0),SRP_bact_NC_003047|3'(0),P20_yes_NC_002516|3'(0)	-	-	-
Burkholderia_cepacia_AMMD	|	Candidate_212_NC_008390	|	Bamb_2891		methyl-accepting chemotaxis sensory transducer	*	<<<	150	|	3192888	3192941	<<<	53	|	0	>>>	Bamb_2892	YCII-related	*	candidate	583	2.1e-20	F	1	RNA	Burkholderia_vietnamiensis_G4_chromosome_1	-	0	-	sokB_NC_000913|3'(0),Cobalamin1_NC_002516|3'(0),P20_yes_NC_002516|3'(0)	-	-	-
Burkholderia_cepacia_AMMD	|	Candidate_216_NC_008390	|	Bamb_2919		glutamate--cysteine ligase	*	<<<	152	|	3218542	3218633	<<<	91	|	0	<<<	Bamb_2920	ammonium transporter	*	candidate	1004	1.7e-39	Z	4	-	Burkholderia_383_chromosome_1<>Burkholderia_cenocepacia_AU_1054_chromosome_1<>Burkholderia_cenocepacia_HI2424_chromosome_1<>Burkholderia_vietnamiensis_G4_chromosome_1	-	0	-	SRP_bact_NC_003047|3'(0)	-	-	-
Burkholderia_cepacia_AMMD	|	Candidate_219_NC_008390	|	Bamb_2979		dienelactone hydrolase and related enzyme-like	*	>>>	507	|	3288418	3288713	>>>	295	|	-19	>>>	Bamb_2980	adenosylmethionine-8-amino-7-oxononanoate	*	candidate	847	1.3e-32	F	4	RNA	Burkholderia_383_chromosome_1<>Burkholderia_cenocepacia_AU_1054_chromosome_1<>Burkholderia_cenocepacia_HI2424_chromosome_1<>Burkholderia_vietnamiensis_G4_chromosome_1	-	0	-	P20_yes_NC_002516|3'(0),P15_yes_NC_002516|3'(0),SRP_bact_NC_003047|3'(0)	5	-	-
Burkholderia_cepacia_AMMD	|	Candidate_222_NC_008390	|	Bamb_0020		Site-specific DNA-methyltransferase	*	<<<	255	|	33221	33306	<<<	85	|	19	<<<	Bamb_0021	outer membrane protein (porin)-like protein	*	candidate	480	5.7e-16	Y	1	-	Burkholderia_383_chromosome_1	-	0	-	THI_NC_002516|3'(0),Cobalamin1_NC_002516|3'(0)	-	-	-
Burkholderia_cepacia_AMMD	|	Candidate_225_NC_008390	|	Bamb_3050		glutathione-disulfide reductase	*	<<<	97	|	3370681	3370834	<<<	153	|	0	<<<	Bamb_3051	hypothetical protein	*	candidate	838	1.6e-32	Z	4	RNA	Burkholderia_383_chromosome_1<>Burkholderia_cenocepacia_AU_1054_chromosome_1<>Burkholderia_cenocepacia_HI2424_chromosome_1<>Burkholderia_vietnamiensis_G4_chromosome_1	-	1	Candidate_132_NC_008390(para)	P20_yes_NC_002516|3'(0)	-	RS	-
Burkholderia_cepacia_AMMD	|	Candidate_230_NC_008390	|	Bamb_0297		Porphobilinogen synthase	*	<<<	66	|	337251	337373	>>>	122	|	64	<<<	Bamb_0298	GTP-binding protein, HSR1-related	*	candidate	553	4.5e-19	X	11	RNA	Burkholderia_mallei_ATCC_23344_chromosome_1<>Burkholderia_pseudomallei_K96243_chromosome_1<>Burkholderia_pseudomallei_1710b_chromosome_1<>Burkholderia_383_chromosome_1<>Burkholderia_xenovorans_LB400_chromosome_1<>Burkholderia_cenocepacia_AU_1054_chromosome_1<>Burkholderia_cenocepacia_HI2424_chromosome_1<>Burkholderia_mallei_NCTC_10229_chromosome_2<>Burkholderia_pseudomallei_668_chromosome_1<>Burk…	-	0	-	spot42_NC_000913|3'(0)	-	-	-
Burkholderia_cepacia_AMMD	|	Candidate_231_NC_008390	|	Bamb_3060		flagellar hook-associated protein FlgK	*	<<<	84	|	3381383	3381436	<<<	53	|	54	<<<	Bamb_3061	YcgR family protein	*	candidate	544	1.8e-18	Z	4	RNA	Burkholderia_383_chromosome_1<>Burkholderia_cenocepacia_AU_1054_chromosome_1<>Burkholderia_cenocepacia_HI2424_chromosome_1<>Burkholderia_vietnamiensis_G4_chromosome_1	-	0	-	P11_yes_NC_002516|3'(0)	-	-	-
Burkholderia_cepacia_AMMD	|	Candidate_236_NC_008390	|	Bamb_3100		two component transcriptional regulator, LuxR	*	>>>	4	|	3422060	3422154	>>>	94	|	124	>>>	Bamb_3101	amino acid permease-associated region	*	candidate	533	3.3e-18	F	3	-	Burkholderia_cenocepacia_AU_1054_chromosome_1<>Burkholderia_cenocepacia_HI2424_chromosome_1<>Burkholderia_vietnamiensis_G4_chromosome_1	-	0	-	Cobalamin2_NC_002516|3'(0)	-	-	-
Burkholderia_cepacia_AMMD	|	Candidate_237_NC_008390	|	Bamb_3108		flagellar hook-basal body complex subunit FliE	*	<<<	12	|	3429129	3429250	>>>	121	|	100	>>>	Bamb_3109	flagellar M-ring protein FliF	*	candidate	535	2.5e-18	F	11	-	Burkholderia_mallei_ATCC_23344_chromosome_1<>Burkholderia_pseudomallei_K96243_chromosome_1<>Burkholderia_383_chromosome_1<>Burkholderia_cenocepacia_AU_1054_chromosome_1<>Burkholderia_cenocepacia_HI2424_chromosome_1<>Burkholderia_mallei_SAVP1_chromosome_2<>Burkholderia_mallei_NCTC_10229_chromosome_2<>Burkholderia_pseudomallei_668_chromosome_1<>Burkholderia_pseudomallei_1106a_chromosome_1<>Burkhold…	-	0	-	P20_yes_NC_002516|3'(0),Cobalamin2_NC_002516|3'(0)	-	-	-
Burkholderia_cepacia_AMMD	|	Candidate_248_NC_008390	|	Bamb_0327		ABC transporter domain protein	*	<<<	351	|	375006	375127	>>>	121	|	155	>>>	Bamb_0328	FAD dependent oxidoreductase	*	candidate	615	5.7e-22	F	9	RNA	Burkholderia_mallei_ATCC_23344_chromosome_1<>Burkholderia_pseudomallei_K96243_chromosome_1<>Burkholderia_pseudomallei_1710b_chromosome_1<>Burkholderia_383_chromosome_1<>Burkholderia_thailandensis_E264_chromosome_1<>Burkholderia_xenovorans_LB400_chromosome_1<>Burkholderia_cenocepacia_AU_1054_chromosome_1<>Burkholderia_cenocepacia_HI2424_chromosome_1<>Burkholderia_vietnamiensis_G4_chromosome_1	-	0	-	Cobalamin1_NC_002516|3'(0),Cobalamin2_NC_002516|3'(0)	-	-	-
Burkholderia_cepacia_AMMD	|	Candidate_250_NC_008390	|	Bamb_0393		ImcF domain protein	*	<<<	189	|	443808	443919	<<<	111	|	0	<<<	Bamb_0394	peptidase M15B and M15C, D,D-carboxypeptidase	*	candidate	1289	1.8e-52	F	4	-	Burkholderia_383_chromosome_1<>Burkholderia_cenocepacia_AU_1054_chromosome_1<>Burkholderia_cenocepacia_HI2424_chromosome_1<>Burkholderia_vietnamiensis_G4_chromosome_1	-	0	-	P11_yes_NC_002516|3'(0)	-	-	-
Burkholderia_cepacia_AMMD	|	Candidate_257_NC_008390	|	Bamb_0496		N-acetylmuramyl-L-alanine amidase, negative	*	>>>	81	|	559899	560239	>>>	340	|	43	>>>	Bamb_0497	ribonucleoside-diphosphate reductase, alpha	*	candidate	753	2e-28	F	8	RNA	Burkholderia_mallei_ATCC_23344_chromosome_1<>Burkholderia_pseudomallei_K96243_chromosome_1<>Burkholderia_pseudomallei_1710b_chromosome_1<>Burkholderia_383_chromosome_1<>Burkholderia_thailandensis_E264_chromosome_1<>Burkholderia_cenocepacia_AU_1054_chromosome_1<>Burkholderia_cenocepacia_HI2424_chromosome_1<>Burkholderia_vietnamiensis_G4_chromosome_1	-	0	-	Cobalamin1_NC_002516|3'(0),P20_yes_NC_002516|3'(0)	5	-	-E.coli_sig70_1(8.5|-283)
Burkholderia_cepacia_AMMD	|	Candidate_275_NC_008390	|	Bamb_0771		membrane protein	*	<<<	103	|	860481	860532	<<<	51	|	18	>>>	Bamb_0772	Phosphomannomutase	*	candidate	508	4e-17	F	2	-	Burkholderia_383_chromosome_1<>Burkholderia_vietnamiensis_G4_chromosome_1	-	0	-	Cobalamin4_NC_002516|3'(0)	-	-	-
Burkholderia_cepacia_AMMD	|	Candidate_1_NC_008391	|	Bamb_4114		outer membrane efflux protein	*	>>>	52	|	1037759	1037813	>>>	54	|	246	>>>	Bamb_4115	MgtC/SapB transporter	*	candidate	1155	2.1e-46	R	8	-	Burkholderia_mallei_ATCC_23344_chromosome_2<>Burkholderia_pseudomallei_K96243_chromosome_2<>Burkholderia_pseudomallei_1710b_chromosome_2<>Burkholderia_383_chromosome_2<>Burkholderia_thailandensis_E264_chromosome_2<>Burkholderia_cenocepacia_AU_1054_chromosome_2<>Burkholderia_cenocepacia_HI2424_chromosome_2<>Burkholderia_vietnamiensis_G4_chromosome_2	-	0	-	P15_yes_NC_002516|3'(0)	-	-	-
Burkholderia_cepacia_AMMD	|	Candidate_2_NC_008391	|	Bamb_4352		hypothetical protein	*	<<<	54	|	1279803	1280021	>>>	218	|	59	<<<	Bamb_4353	PEP phosphonomutase	*	candidate	645	2.4e-23	R	3	-	Burkholderia_383_chromosome_2<>Burkholderia_cenocepacia_AU_1054_chromosome_2<>Burkholderia_vietnamiensis_G4_chromosome_2	-	0	-	Cobalamin1_NC_002516|3'(0)	-	-	-
Burkholderia_cepacia_AMMD	|	Candidate_4_NC_008391	|	Bamb_4830		hypothetical protein	*	<<<	2	|	1826785	1826839	>>>	54	|	116	<<<	Bamb_4831	hypothetical protein	*	candidate	498	1.7e-16	R	1	-	Burkholderia_vietnamiensis_G4_chromosome_2	-	0	-	Cobalamin1_NC_002516|3'(0)	-	-	-
Burkholderia_cepacia_AMMD	|	Candidate_14_NC_008391	|	Bamb_3937		major facilitator superfamily MFS_1	*	<<<	14	|	833724	833855	<<<	131	|	5	<<<	Bamb_3938	hypothetical protein	*	candidate	572	9.3e-20	T	3	RNA	Burkholderia_383_chromosome_2<>Burkholderia_thailandensis_E264_chromosome_2<>Burkholderia_vietnamiensis_G4_chromosome_2	-	0	-	Cobalamin1_NC_002516|UD(5'(1-0)|3'(1-0)),Cobalamin2_NC_002516|3'(0),P18_yes_NC_002516|3'(0)	5	-	-Multi_s54(12.36|-141)
Burkholderia_cepacia_AMMD	|	Candidate_15_NC_008391	|	Bamb_4009		transcriptional regulator, LysR family	*	>>>	124	|	924692	924887	>>>	195	|	99	>>>	Bamb_4010	drug resistance transporter, EmrB/QacA	*	candidate	497	7.9e-17	T	3	-	Burkholderia_383_chromosome_2<>Burkholderia_cenocepacia_AU_1054_chromosome_2<>Burkholderia_cenocepacia_HI2424_chromosome_2	-	0	-	P20_yes_NC_002516|3'(0)	-	-	-
Burkholderia_cepacia_AMMD	|	Candidate_19_NC_008391	|	Bamb_4631		amino acid permease-associated region	*	>>>	20	|	1604676	1604789	>>>	113	|	28	>>>	Bamb_4632	FAD dependent oxidoreductase	*	candidate	483	9.7e-16	T	1	RNA	Burkholderia_383_chromosome_2	-	0	-	SRP_bact_NC_003047|3'(0),Cobalamin1_NC_002516|3'(0)	5	-	-
Burkholderia_cepacia_AMMD	|	Candidate_20_NC_008391	|	Bamb_4825		protein of unknown function DUF748	*	<<<	12	|	1820107	1820245	<<<	138	|	0	<<<	Bamb_4826	protein of unknown function DUF1214	*	candidate	568	1.4e-19	T	3	RNA	Burkholderia_383_chromosome_2<>Burkholderia_cenocepacia_AU_1054_chromosome_2<>Burkholderia_cenocepacia_HI2424_chromosome_2	-	0	-	Cobalamin1_NC_002516|UD(5'(1-1)|3'(0-0)),SRP_bact_NC_003047|3'(0),P20_yes_NC_002516|3'(0),P15_yes_NC_002516|3'(0)	5	-	-
Burkholderia_cepacia_AMMD	|	Candidate_23_NC_008391	|	Bamb_5518		response regulator receiver modulated CheB	*	>>>	5	|	2589345	2589559	>>>	214	|	22	>>>	Bamb_5519	Cl- channel, voltage-gated family protein	*	candidate	889	2.5e-34	T	4	-	Burkholderia_383_chromosome_2<>Burkholderia_cenocepacia_AU_1054_chromosome_2<>Burkholderia_cenocepacia_HI2424_chromosome_2<>Burkholderia_vietnamiensis_G4_chromosome_2	-	1	Candidate_101_NC_008391(para)	SRP_bact_NC_002516|UD(5'(1-1)|3'(0-1)),Cobalamin2_NC_002516|UD(5'(1-1)|3'(0-0))	5	-	-E.coli_sig70_3(7.17|-161)
Burkholderia_cepacia_AMMD	|	Candidate_33_NC_008391	|	Bamb_4343		2-nitropropane dioxygenase, NPD	*	<<<	19	|	1269852	1270276	<<<	424	|	0	>>>	Bamb_4344	amino acid permease-associated region	*	candidate	617	2.5e-22	F	1	RNA	Burkholderia_vietnamiensis_G4_chromosome_2	-	0	-	P15_yes_NC_002516|UD(5'(1-0)|3'(0-1)),Cobalamin1_NC_002516|3'(0)	5	-	-
Burkholderia_cepacia_AMMD	|	Candidate_37_NC_008391	|	Bamb_3344		aspartate-semialdehyde dehydrogenase	*	>>>	37	|	137340	137494	>>>	154	|	74	>>>	Bamb_3345	hypothetical protein	*	candidate	771	1.7e-29	Z	3	RNA	Burkholderia_cenocepacia_AU_1054_chromosome_2<>Burkholderia_cenocepacia_HI2424_chromosome_2<>Burkholderia_vietnamiensis_G4_chromosome_2	-	0	-	Cobalamin2_NC_002516|3'(0),SRP_bact_NC_003047|3'(0),P34_yes_NC_002516|3'(0),P20_yes_NC_002516|3'(0),C22_NC_003047|3'(0)	5	-	-
Burkholderia_cepacia_AMMD	|	Candidate_40_NC_008391	|	Bamb_4454		hypothetical protein	*	>>>	1	|	1393416	1393500	>>>	84	|	106	<<<	Bamb_4455	Gamma-butyrobetaine dioxygenase	*	candidate	681	8.5e-25	Z	4	RNA	Burkholderia_383_chromosome_2<>Burkholderia_cenocepacia_AU_1054_chromosome_2<>Burkholderia_cenocepacia_HI2424_chromosome_2<>Burkholderia_vietnamiensis_G4_chromosome_2	-	1	Candidate_39_NC_008391(para)	P20_yes_NC_002516|3'(0)	-	-	-
Burkholderia_cepacia_AMMD	|	Candidate_41_NC_008391	|	Bamb_4454		hypothetical protein	*	>>>	1	|	1393416	1393570	>>>	154	|	36	<<<	Bamb_4455	Gamma-butyrobetaine dioxygenase	*	candidate	681	8.5e-25	Z	4	RNA	Burkholderia_383_chromosome_2<>Burkholderia_cenocepacia_AU_1054_chromosome_2<>Burkholderia_cenocepacia_HI2424_chromosome_2<>Burkholderia_vietnamiensis_G4_chromosome_2	-	1	Candidate_39_NC_008391(para)	P20_yes_NC_002516|3'(0)	-	-	-
Burkholderia_cepacia_AMMD	|	Candidate_44_NC_008391	|	Bamb_4567		glycine betaine/L-proline ABC transporter,	*	<<<	2	|	1519553	1519839	>>>	286	|	324	>>>	Bamb_4568	membrane protein-like protein	*	candidate	651	6.1e-24	F	6	RNA	Burkholderia_pseudomallei_K96243_chromosome_2<>Burkholderia_pseudomallei_1710b_chromosome_2<>Burkholderia_383_chromosome_2<>Burkholderia_cenocepacia_AU_1054_chromosome_2<>Burkholderia_cenocepacia_HI2424_chromosome_2<>Burkholderia_vietnamiensis_G4_chromosome_2	-	1	Candidate_45_NC_008391(opp)	Cobalamin2_NC_002516|3'(0),P20_yes_NC_002516|3'(0),Cobalamin1_NC_002516|3'(0),SRP_bact_NC_003047|3'(0),P36_yes_NC_002516|3'(0)	-	-	-
Burkholderia_cepacia_AMMD	|	Candidate_46_NC_008391	|	Bamb_3359		acyltransferase 3	*	<<<	38	|	154141	154341	>>>	200	|	230	>>>	Bamb_3361	hypothetical protein	*	candidate	1371	2.5e-56	F	4	-	Burkholderia_383_chromosome_2<>Burkholderia_cenocepacia_AU_1054_chromosome_2<>Burkholderia_cenocepacia_HI2424_chromosome_2<>Burkholderia_vietnamiensis_G4_chromosome_2	-	0	-	P20_yes_NC_002516|3'(0),P15_yes_NC_002516|3'(0)	-	-	-
Burkholderia_cepacia_AMMD	|	Candidate_54_NC_008391	|	Bamb_4771		hypothetical protein	*	>>>	9	|	1762744	1762813	>>>	69	|	154	>>>	Bamb_4772	TonB-dependent	*	candidate	777	3.3e-29	Y	3	-	Burkholderia_383_chromosome_2<>Burkholderia_cenocepacia_AU_1054_chromosome_2<>Burkholderia_cenocepacia_HI2424_chromosome_2	-	0	-	P11_yes_NC_002516|3'(0)	-	-	-
Burkholderia_cepacia_AMMD	|	Candidate_57_NC_008391	|	Bamb_4838		L-carnitine dehydratase/bile acid-inducible	*	<<<	273	|	1834906	1834976	<<<	70	|	14	<<<	Bamb_4839	putative AcnD-accessory protein PrpF	*	candidate	493	6.7e-17	Y	2	-	Burkholderia_pseudomallei_K96243_chromosome_1<>Burkholderia_pseudomallei_1106a_chromosome_1	-	0	-	Cobalamin3_NC_002516|3'(0),P20_yes_NC_002516|3'(0),Cobalamin1_NC_002516|3'(0)	-	-	-
Burkholderia_cepacia_AMMD	|	Candidate_58_NC_008391	|	Bamb_4849		GCN5-related N-acetyltransferase	*	<<<	415	|	1851132	1851203	<<<	71	|	0	<<<	Bamb_4850	histone family protein nucleoid-structuring	*	candidate	1141	4.6e-46	Y	1	-	Burkholderia_cenocepacia_AU_1054_chromosome_2	-	0	-	Cobalamin3_NC_002516|3'(0),PrrF_NC_002516|3'(0),Prrf1_NC_002516|3'(0),Prrf2_NC_002516|3'(0),SRP_bact_NC_003047|3'(0)	3	-	-
Burkholderia_cepacia_AMMD	|	Candidate_59_NC_008391	|	Bamb_4853		sigma54 specific transcriptional regulator, Fis	*	<<<	1	|	1854042	1854197	>>>	155	|	169	>>>	Bamb_4854	Citrate transporter	*	candidate	1101	5.5e-44	X	4	RNA	Burkholderia_383_chromosome_2<>Burkholderia_cenocepacia_AU_1054_chromosome_2<>Burkholderia_cenocepacia_HI2424_chromosome_2<>Burkholderia_vietnamiensis_G4_chromosome_2	-	0	-	SRP_bact_NC_003047|3'(0)	-	-	-
Burkholderia_cepacia_AMMD	|	Candidate_60_NC_008391	|	Bamb_4875		glycosyl transferase, family 2	*	<<<	81	|	1880743	1881091	<<<	348	|	2	>>>	Bamb_4876	hydroxymethylbutenyl pyrophosphate reductase	*	candidate	1477	4.2e-61	X	4	RNA	Burkholderia_383_chromosome_2<>Burkholderia_cenocepacia_AU_1054_chromosome_2<>Burkholderia_cenocepacia_HI2424_chromosome_2<>Burkholderia_vietnamiensis_G4_chromosome_2	-	0	-	Cobalamin1_NC_002516|3'(0),P30_yes_NC_002516|3'(0)	-	-	-
Burkholderia_cepacia_AMMD	|	Candidate_68_NC_008391	|	Bamb_5233		hypothetical protein	*	<<<	105	|	2273267	2273322	>>>	55	|	271	>>>	Bamb_5234	major facilitator superfamily MFS_1	*	candidate	664	2.9e-24	F	2	-	Burkholderia_383_chromosome_2<>Burkholderia_cenocepacia_HI2424_chromosome_2	-	0	-	P15_yes_NC_002516|3'(0)	-	-	-
Burkholderia_cepacia_AMMD	|	Candidate_70_NC_008391	|	Bamb_5242		hypothetical protein	*	>>>	16	|	2283769	2283977	<<<	208	|	0	<<<	Bamb_5243	CsbD family protein	*	candidate	736	2.2e-27	Z	1	COD	Burkholderia_cenocepacia_HI2424_chromosome_2	-	0	-	SRP_bact_NC_003047|3'(0)	-	-	-
Burkholderia_cepacia_AMMD	|	Candidate_72_NC_008391	|	Bamb_5361		transcriptional regulator, AraC family	*	<<<	2	|	2404296	2404383	>>>	87	|	59	>>>	Bamb_5362	NAD/NADP octopine/nopaline dehydrogenase	*	candidate	506	8.7e-17	F	2	-	Burkholderia_cenocepacia_AU_1054_chromosome_2<>Burkholderia_cenocepacia_HI2424_chromosome_2	-	0	-	P20_yes_NC_002516|3'(0),Cobalamin1_NC_002516|3'(0)	5	-	-
Burkholderia_cepacia_AMMD	|	Candidate_73_NC_008391	|	Bamb_5364		major facilitator superfamily MFS_1	*	<<<	99	|	2408065	2408118	<<<	53	|	321	>>>	Bamb_5365	GP29	*	candidate	151	1.7e-16	X	1	-	Burkholderia_383_chromosome_2	-	0	-	Cobalamin1_NC_002516|3'(0)	-	-	-
Burkholderia_cepacia_AMMD	|	Candidate_75_NC_008391	|	Bamb_5419		hypothetical protein	*	>>>	97	|	2467099	2467459	<<<	360	|	14	>>>	Bamb_5420	TonB-dependent siderophore receptor	*	candidate	1101	2.9e-44	F	2	-	Burkholderia_383_chromosome_2<>Burkholderia_vietnamiensis_G4_chromosome_2	-	1	Candidate_79_NC_008391(para)	SRP_bact_NC_002516|UD(5'(0-1)|3'(1-1))	-	-	-
Burkholderia_cepacia_AMMD	|	Candidate_78_NC_008391	|	Bamb_5456		hypothetical protein	*	>>>	4	|	2520471	2520537	>>>	66	|	223	>>>	Bamb_5457	transcriptional regulator, LysR family	*	candidate	536	2.9e-18	Z	2	RNA	Burkholderia_cenocepacia_AU_1054_chromosome_2<>Burkholderia_cenocepacia_HI2424_chromosome_2	-	0	-	C22_NC_003047|3'(0)	-	-	-
Burkholderia_cepacia_AMMD	|	Candidate_81_NC_008391	|	Bamb_5522		riboflavin synthase, alpha subunit	*	<<<	106	|	2592949	2593052	<<<	103	|	10	<<<	Bamb_5523	ABC transporter related	*	candidate	497	1.6e-16	Z	1	RNA	Burkholderia_383_chromosome_2	-	1	Candidate_61_NC_008391(para)	RFN_NC_002516|3'(0)	-	-	-
Burkholderia_cepacia_AMMD	|	Candidate_85_NC_008391	|	Bamb_5545		mannose-1-phosphate	*	<<<	223	|	2617798	2617953	<<<	155	|	0	>>>	Bamb_5546	sugar transferase	*	candidate	324	1.1e-43	F	7	-	Burkholderia_pseudomallei_K96243_chromosome_2<>Burkholderia_pseudomallei_1710b_chromosome_2<>Burkholderia_383_chromosome_2<>Burkholderia_thailandensis_E264_chromosome_2<>Burkholderia_cenocepacia_AU_1054_chromosome_2<>Burkholderia_cenocepacia_HI2424_chromosome_2<>Burkholderia_vietnamiensis_G4_chromosome_2	-	0	-	SRP_bact_NC_003047|3'(0),Cobalamin1_NC_002516|3'(0)	-	-	-
Burkholderia_cepacia_AMMD	|	Candidate_86_NC_008391	|	Bamb_3490		alanine racemase	*	<<<	214	|	297597	297684	<<<	87	|	1	>>>	Bamb_3491	membrane protein-like protein	*	candidate	895	1.2e-34	X	4	-	Burkholderia_383_chromosome_2<>Burkholderia_cenocepacia_AU_1054_chromosome_2<>Burkholderia_cenocepacia_HI2424_chromosome_2<>Burkholderia_vietnamiensis_G4_chromosome_2	-	0	-	SRP_bact_NC_003047|3'(0),P15_yes_NC_002516|3'(0)	-	-	-
Burkholderia_cepacia_AMMD	|	Candidate_109_NC_008391	|	Bamb_3946		major facilitator superfamily MFS_1	*	<<<	-30	|	841829	842009	<<<	180	|	0	<<<	Bamb_3947	peptidase S1 and S6, chymotrypsin/Hap	*	candidate	501	9.6e-17	X	1	-	Burkholderia_vietnamiensis_G4_chromosome_2	-	0	-	P20_yes_NC_002516|3'(0)	5	-	-E.coli_sig70_3(7.99|-147)
Burkholderia_cepacia_AMMD	|	Candidate_111_NC_008391	|	Bamb_3991		extracellular solute-binding protein, family 3	*	<<<	11	|	901752	901849	>>>	97	|	303	>>>	Bamb_3992	peptidase S8 and S53, subtilisin, kexin,	*	candidate	686	2.2e-25	F	4	-	Burkholderia_383_chromosome_2<>Burkholderia_cenocepacia_AU_1054_chromosome_2<>Burkholderia_cenocepacia_HI2424_chromosome_2<>Burkholderia_vietnamiensis_G4_chromosome_2	-	0	-	SRP_bact_NC_003047|3'(0),Cobalamin2_NC_002516|3'(0)	-	-	-
Burkholderia_cepacia_AMMD	|	Candidate_112_NC_008391	|	Bamb_3992		peptidase S8 and S53, subtilisin, kexin,	*	>>>	199	|	904020	904253	>>>	233	|	294	>>>	Bamb_3993	magnesium-translocating P-type ATPase	*	candidate	627	1.3e-22	Z	8	RNA	Burkholderia_pseudomallei_K96243_chromosome_2<>Burkholderia_383_chromosome_2<>Burkholderia_thailandensis_E264_chromosome_2<>Burkholderia_mallei_SAVP1_chromosome_1<>Burkholderia_mallei_NCTC_10229_chromosome_1<>Burkholderia_pseudomallei_668_chromosome_2<>Burkholderia_mallei_NCTC_10247_chromosome_1<>Burkholderia_vietnamiensis_G4_chromosome_2	-	0	-	ykoK_NC_003210|3'(0),P34_yes_NC_002516|3'(0),P26_yes_NC_002516|3'(0),P11_yes_NC_002516|3'(0)	-	-	-E.coli_sig70_3(7.99|-266)
Burkholderia_cepacia_AMMD	|	Candidate_113_NC_008391	|	Bamb_4009		transcriptional regulator, LysR family	*	>>>	124	|	924692	925035	>>>	343	|	-49	>>>	Bamb_4010	drug resistance transporter, EmrB/QacA	*	candidate	497	7.9e-17	F	3	-	Burkholderia_383_chromosome_2<>Burkholderia_cenocepacia_AU_1054_chromosome_2<>Burkholderia_cenocepacia_HI2424_chromosome_2	-	0	-	P20_yes_NC_002516|3'(0)	5	-	-
Burkholderia_cepacia_AMMD	|	Candidate_5_NC_008392	|	Bamb_5961		peptide methionine sulfoxide reductase	*	>>>	10	|	496099	496159	>>>	60	|	147	>>>	Bamb_5962	Rieske (2Fe-2S) domain protein	*	candidate	543	1.2e-18	T	1	-	Burkholderia_383_chromosome_3	-	0	-	P15_yes_NC_002516|3'(0)	-	-	-
Burkholderia_cepacia_AMMD	|	Candidate_14_NC_008392	|	Bamb_5782		AMP-dependent synthetase and ligase	*	<<<	64	|	256339	256482	<<<	143	|	110	>>>	Bamb_5783	transcriptional regulator, AraC family	*	candidate	506	4.3e-17	X	4	RNA	Burkholderia_383_chromosome_3<>Burkholderia_cenocepacia_AU_1054_chromosome_1<>Burkholderia_cenocepacia_HI2424_chromosome_3<>Burkholderia_vietnamiensis_G4_chromosome_3	-	0	-	P20_yes_NC_002516|3'(0),P15_yes_NC_002516|3'(0)	-	-	-
Burkholderia_cepacia_AMMD	|	Candidate_25_NC_008392	|	Bamb_6348		aminotransferase class-III	*	<<<	1	|	956862	956990	>>>	128	|	31	<<<	Bamb_6349	D-isomer specific 2-hydroxyacid dehydrogenase,	*	candidate	627	2.8e-22	F	3	-	Burkholderia_cenocepacia_AU_1054_chromosome_3<>Burkholderia_cenocepacia_HI2424_chromosome_3<>Burkholderia_vietnamiensis_G4_chromosome_3	-	0	-	Cobalamin1_NC_002516|UD(5'(0-0)|3'(0-0))	-	-	-
Burkholderia_mallei_ATCC_23344	|	Candidate_1_NC_006348	|	BMA0014		pseudogene	*	>>>	0	|	18395	18699	>>>	304	|	55	<<<	BMA0015	pseudogene	*	candidate	642	1.2e-19	R	16	RNA	Mycobacterium_tuberculosis_CDC1551_chromosome<>Bordetella_parapertussis_chromosome<>Ralstonia_solanacearum_plasmid_pGMI1000MP<>Leifsonia_xyli_xyli_CTCB0_chromosome<>Burkholderia_pseudomallei_K96243_chromosome_1<>Burkholderia_pseudomallei_K96243_chromosome_2<>Burkholderia_pseudomallei_1710b_chromosome_1<>Burkholderia_pseudomallei_1710b_chromosome_2<>Burkholderia_thailandensis_E264_chromosome_2<>Bu…	-	0	-	Cobalamin4_NC_002516|UD(5'(1-1)|3'(1-0)),P18_yes_NC_002516|UD(5'(1-0)|3'(1-1)),Cobalamin1_NC_002516|UD(5'(1-0)|3'(1-0)),P11_yes_NC_002516|UD(5'(1-0)|3'(1-0))	-	-	-
Burkholderia_mallei_ATCC_23344	|	Candidate_3_NC_006348	|	BMA0929		5'-methylthioadenosine/S-adenosylhomocysteine	*	>>>	1	|	978672	979017	>>>	345	|	-10	<<<	BMA0930	fosmidomycin resistance protein	*	candidate	1630	6.5e-68	R	4	RNA	Burkholderia_pseudomallei_K96243_chromosome_1<>Burkholderia_pseudomallei_1710b_chromosome_1<>Burkholderia_pseudomallei_668_chromosome_1<>Burkholderia_pseudomallei_1106a_chromosome_1	-	0	-	Cobalamin1_NC_002516|UD(5'(1-0)|3'(1-0)),P18_yes_NC_002516|UD(5'(1-0)|3'(0-1))	-	-	-
Burkholderia_mallei_ATCC_23344	|	Candidate_12_NC_006348	|	BMA3087		hypothetical protein	*	<<<	92	|	3182961	3183028	<<<	67	|	0	<<<	BMA3088	pseudogene	*	candidate	534	1e-17	R	1	RNA	Burkholderia_thailandensis_E264_chromosome_1	-	7	Candidate_221_NC_006348(para),Candidate_26_NC_006348(para),Candidate_274_NC_006348(para),Candidate_101_NC_006348(para),Candidate_419_NC_006348(para),Candidate_67_NC_006348(para),Candidate_357_NC_006348(para)	Cobalamin1_NC_002516|3'(0),P20_yes_NC_002516|3'(0)	3	RS	-
Burkholderia_mallei_ATCC_23344	|	Candidate_13_NC_006348	|	BMA2347		hypothetical protein	*	<<<	-29	|	2449977	2450183	<<<	206	|	0	>>>	BMA2348	tyrosyl-tRNA synthetase	*	candidate	866	4e-33	R	1	RNA	Burkholderia_pseudomallei_668_chromosome_1	-	0	-	Cobalamin1_NC_002516|3'(0)	5	-	-
Burkholderia_mallei_ATCC_23344	|	Candidate_19_NC_006348	|	BMA0018		pseudogene	*	<<<	13	|	20643	20872	>>>	229	|	16	>>>	BMA0019	FHA domain protein	*	candidate	1226	2.9e-48	T	5	RNA	Burkholderia_pseudomallei_K96243_chromosome_1<>Burkholderia_pseudomallei_1710b_chromosome_1<>Burkholderia_thailandensis_E264_chromosome_1<>Burkholderia_pseudomallei_668_chromosome_1<>Burkholderia_pseudomallei_1106a_chromosome_1	-	0	-	Cobalamin4_NC_002516|UD(5'(1-1)|3'(1-0)),P18_yes_NC_002516|UD(5'(1-0)|3'(1-1)),Cobalamin1_NC_002516|UD(5'(1-0)|3'(1-0)),P11_yes_NC_002516|UD(5'(1-0)|3'(1-0))	5	-	-E.coli_sig70_2(7.93|-86)
Burkholderia_mallei_ATCC_23344	|	Candidate_30_NC_006348	|	BMA0303		Sua5/YciO/YrdC/YwlC family protein	*	>>>	128	|	319346	319470	<<<	124	|	0	<<<	BMA0304	hypothetical protein	*	candidate	502	5.8e-17	T	3	RNA	Burkholderia_pseudomallei_K96243_chromosome_1<>Burkholderia_pseudomallei_668_chromosome_1<>Burkholderia_pseudomallei_1106a_chromosome_1	-	6	Candidate_31_NC_006348(anti),Candidate_48_NC_006348(para),Candidate_242_NC_006348(para),Candidate_357_NC_006348(para),Candidate_231_NC_006348(para),Candidate_439_NC_006348(para),Candidate_440_NC_006348(para)	P18_yes_NC_002516|UD(5'(0-0)|3'(0-1)),Cobalamin4_NC_002516|UD(5'(0-1)|3'(0-0))	-	-	-
Burkholderia_mallei_ATCC_23344	|	Candidate_31_NC_006348	|	BMA0303		Sua5/YciO/YrdC/YwlC family protein	*	>>>	1	|	319219	319388	>>>	169	|	82	<<<	BMA0304	hypothetical protein	*	candidate	502	5.8e-17	T	3	RNA	Burkholderia_pseudomallei_K96243_chromosome_1<>Burkholderia_pseudomallei_668_chromosome_1<>Burkholderia_pseudomallei_1106a_chromosome_1	-	6	Candidate_30_NC_006348(anti),Candidate_48_NC_006348(para),Candidate_242_NC_006348(para),Candidate_357_NC_006348(para),Candidate_231_NC_006348(para),Candidate_439_NC_006348(para),Candidate_440_NC_006348(para)	Cobalamin3_NC_002516|UD(5'(0-0)|3'(0-1)),P20_yes_NC_002516|3'(0)	-	-	-
Burkholderia_mallei_ATCC_23344	|	Candidate_32_NC_006348	|	BMA0303		Sua5/YciO/YrdC/YwlC family protein	*	>>>	1	|	319219	319476	>>>	257	|	-6	<<<	BMA0304	hypothetical protein	*	candidate	502	5.8e-17	T	3	RNA	Burkholderia_pseudomallei_K96243_chromosome_1<>Burkholderia_pseudomallei_668_chromosome_1<>Burkholderia_pseudomallei_1106a_chromosome_1	-	6	Candidate_30_NC_006348(anti),Candidate_48_NC_006348(para),Candidate_242_NC_006348(para),Candidate_357_NC_006348(para),Candidate_231_NC_006348(para),Candidate_439_NC_006348(para),Candidate_440_NC_006348(para)	Cobalamin3_NC_002516|UD(5'(0-0)|3'(0-1)),P20_yes_NC_002516|3'(0)	-	-	-
Burkholderia_mallei_ATCC_23344	|	Candidate_43_NC_006348	|	BMA0568		glycosyl transferase, group 1 family protein	*	>>>	3	|	594566	594687	>>>	121	|	219	>>>	BMA0569	hypothetical protein	*	candidate	1367	4.9e-56	T	5	RNA	Burkholderia_pseudomallei_K96243_chromosome_1<>Burkholderia_pseudomallei_1710b_chromosome_1<>Burkholderia_thailandensis_E264_chromosome_1<>Burkholderia_pseudomallei_668_chromosome_1<>Burkholderia_pseudomallei_1106a_chromosome_1	-	0	-	yybP1ykoY_NC_002516|UD(5'(1-1)|3'(0-1)),P20_yes_NC_002516|3'(0)	-	-	-
Burkholderia_mallei_ATCC_23344	|	Candidate_47_NC_006348	|	BMA0714		deoxycytidine triphosphate deaminase	*	>>>	1	|	740141	740227	>>>	86	|	14	>>>	BMA0715	Orn/Lys/Arg decarboxylase	*	candidate	510	8.3e-17	T	5	-	Burkholderia_pseudomallei_K96243_chromosome_1<>Burkholderia_pseudomallei_1710b_chromosome_1<>Burkholderia_thailandensis_E264_chromosome_1<>Burkholderia_pseudomallei_668_chromosome_1<>Burkholderia_pseudomallei_1106a_chromosome_1	-	0	-	Cobalamin1_NC_002516|3'(0)	5	-	-
Burkholderia_mallei_ATCC_23344	|	Candidate_48_NC_006348	|	BMA0769		transcriptional regulator, AraC family	*	>>>	50	|	801506	801888	>>>	382	|	-17	>>>	BMA0770	carbamoyl-phosphate synthase small subunit	*	candidate	490	1.9e-16	T	8	RNA	Burkholderia_pseudomallei_K96243_chromosome_1<>Burkholderia_pseudomallei_1710b_chromosome_1<>Burkholderia_383_chromosome_1<>Burkholderia_thailandensis_E264_chromosome_1<>Burkholderia_cenocepacia_AU_1054_chromosome_1<>Burkholderia_cepacia_AMMD_chromosome_1<>Burkholderia_cenocepacia_HI2424_chromosome_1<>Burkholderia_vietnamiensis_G4_chromosome_1	-	2	Candidate_30_NC_006348(para),Candidate_31_NC_006348(para)	P32_yes_NC_002516|3'(0)	5	RS	-E.coli_sig70_3(9.95|-257)
Burkholderia_mallei_ATCC_23344	|	Candidate_50_NC_006348	|	BMA0883		multidrug resistance protein, putative	*	<<<	130	|	921919	922027	<<<	108	|	0	<<<	BMA0884	hypothetical protein	*	candidate	1177	2.6e-47	T	1	RNA	Burkholderia_pseudomallei_668_chromosome_1	-	25	Candidate_386_NC_006348(para),Candidate_86_NC_006348(para),Candidate_357_NC_006348(para),Candidate_402_NC_006348(para),Candidate_99_NC_006348(para),Candidate_364_NC_006348(para),Candidate_407_NC_006348(para),Candidate_324_NC_006348(para),Candidate_325_NC_006348(para),Candidate_6_NC_006348(para),Candidate_63_NC_006348(para),Candidate_359_NC_006348(para),Candidate_101_NC_006348(para),Candidate_238_…	RsmY_NC_002516|3'(0)	-	-	-
Burkholderia_mallei_ATCC_23344	|	Candidate_52_NC_006348	|	BMA0931		methyl-accepting chemotaxis protein, putative	*	>>>	1	|	982288	982552	>>>	264	|	73	<<<	BMA0932	hypothetical protein	*	candidate	723	5.5e-27	T	1	RNA	Burkholderia_pseudomallei_K96243_chromosome_1	-	17	Candidate_51_NC_006348(anti),Candidate_26_NC_006348(para),Candidate_27_NC_006348(para),Candidate_341_NC_006348(para),Candidate_86_NC_006348(para),Candidate_419_NC_006348(para),Candidate_180_NC_006348(para),Candidate_399_NC_006348(para),Candidate_480_NC_006348(para),Candidate_265_NC_006348(para),Candidate_101_NC_006348(para),Candidate_221_NC_006348(para),Candidate_169_NC_006348(para),Candidate_15_…	P18_yes_NC_002516|3'(0)	-	-	-
Burkholderia_mallei_ATCC_23344	|	Candidate_55_NC_006348	|	BMA1058		drug resistance transporter, EmrB/QacA family	*	>>>	120	|	1107819	1107968	<<<	149	|	0	<<<	BMA1059	tRNA pseudouridine synthase B	*	candidate	1332	2.3e-54	T	3	RNA	Burkholderia_pseudomallei_K96243_chromosome_1<>Burkholderia_pseudomallei_1710b_chromosome_1<>Burkholderia_pseudomallei_668_chromosome_1	-	9	Candidate_292_NC_006348(para),Candidate_293_NC_006348(para),Candidate_89_NC_006348(para),Candidate_337_NC_006348(para),Candidate_483_NC_006348(para),Candidate_485_NC_006348(para),Candidate_15_NC_006348(para),Candidate_155_NC_006348(para),Candidate_105_NC_006348(para)	P15_yes_NC_002516|UD(5'(0-0)|3'(0-1))	-	-	-
Burkholderia_mallei_ATCC_23344	|	Candidate_60_NC_006348	|	BMA1397		lipoprotein, NLP/P60 family	*	>>>	118	|	1457693	1457809	<<<	116	|	0	<<<	BMA1398	phosphate transporter family protein	*	candidate	1166	8.4e-47	T	4	RNA	Burkholderia_pseudomallei_K96243_chromosome_1<>Burkholderia_pseudomallei_1710b_chromosome_1<>Burkholderia_pseudomallei_668_chromosome_1<>Burkholderia_pseudomallei_1106a_chromosome_1	-	1	Candidate_61_NC_006348(anti),Candidate_231_NC_006348(para)	SRP_bact_NC_003047|3'(0)	-	-	-
[truncated: 2,673 more rows]
